# Supplementary material
Source: PubMed Central journal article supplement (PMC2598838)

Comparison of theoretical (black, dashed line) and experimental (red, solid line) isotopic distributions

# Fatty acids

Negative ESI: FA 14:0; C<sub>14</sub>H<sub>27</sub>O<sub>2</sub>; theoretical *m/z* 227.2011, (M-H)<sup>-</sup>; isotopic fit 0.139

### Isotope 1

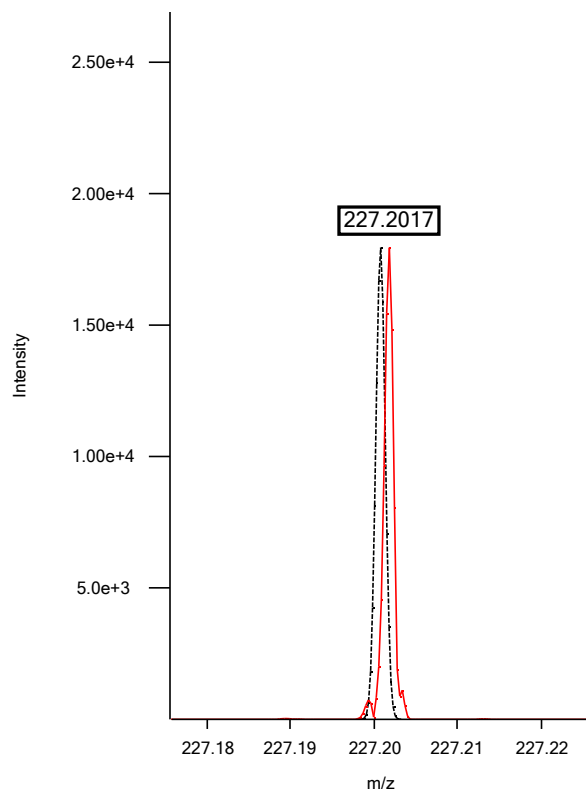

### Isotope 2

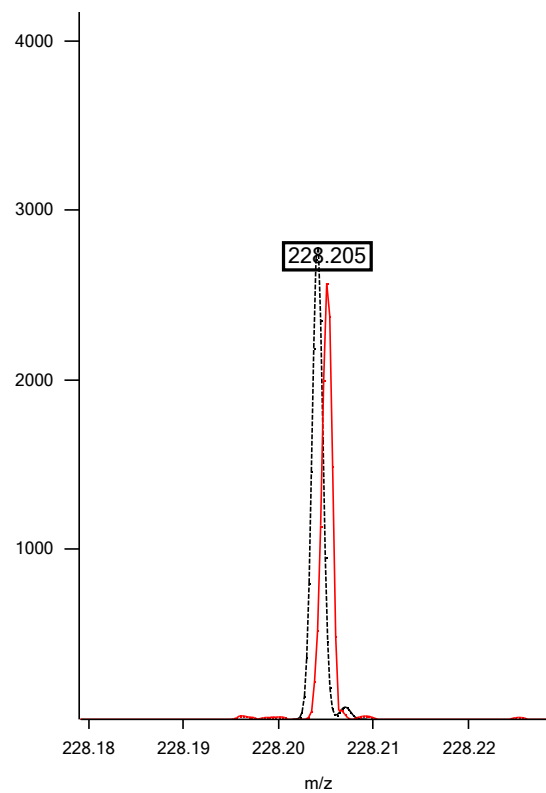

### Isotope 3

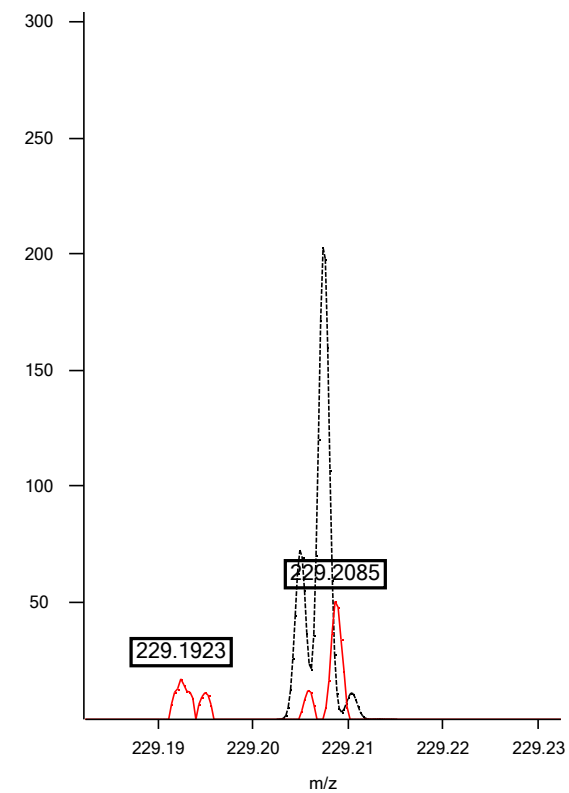

Negative ESI: FA 15:0; C<sub>15</sub>H<sub>29</sub>O<sub>2</sub>; theoretical *m/z* 241.2167, (M-H)<sup>-</sup>; isotopic fit 0.000

Isotope 1

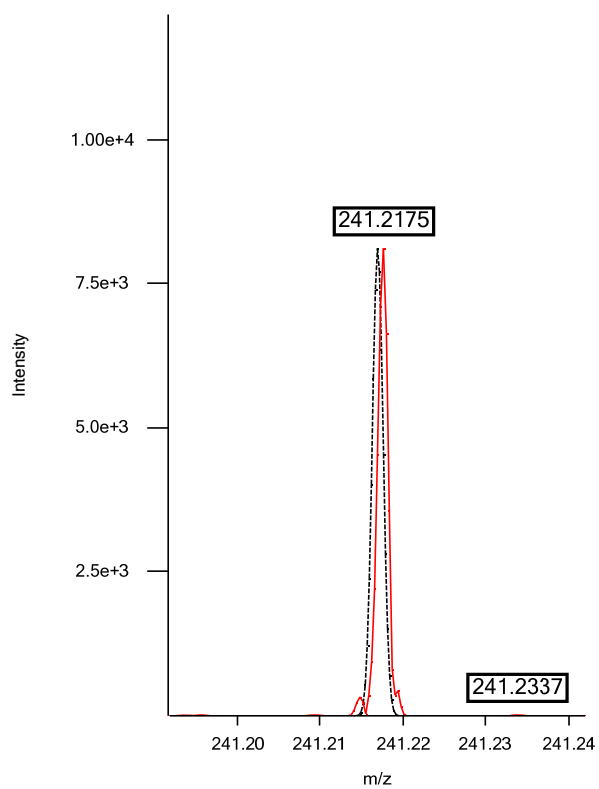

Isotope 2

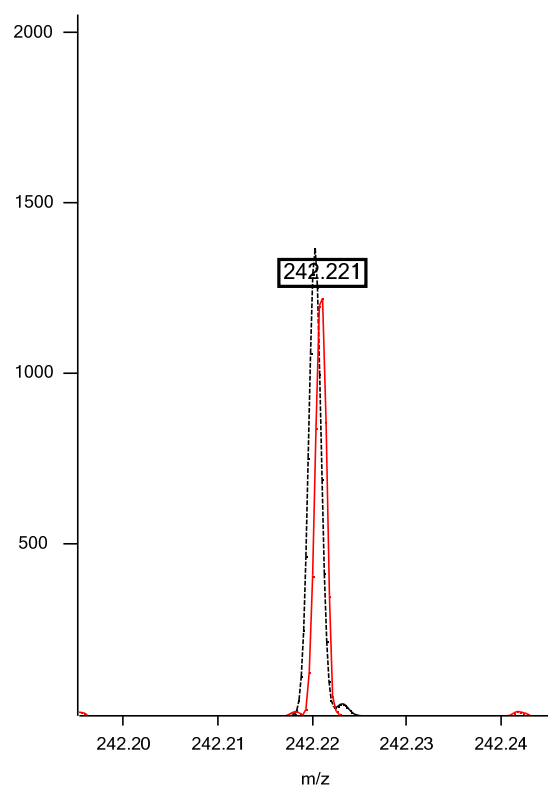

Isotope 3

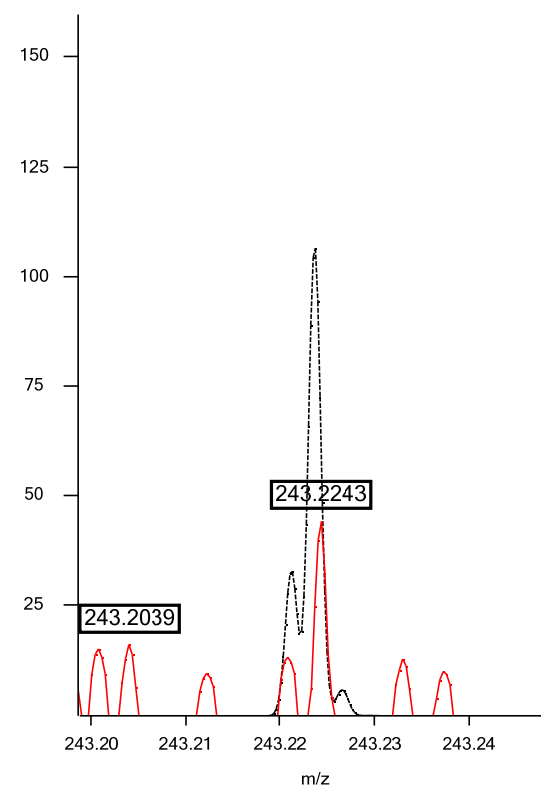

Negative ESI: FA 16:0; C<sub>16</sub>H<sub>31</sub>O<sub>2</sub>; theoretical *m/z* 255.2324, (M-H)<sup>-</sup>; isotopic fit 0.000

Isotope 1

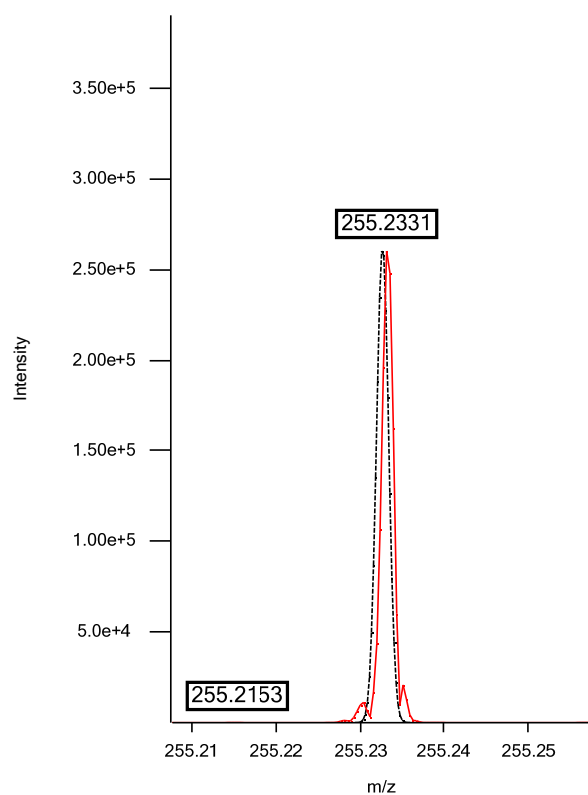

Isotope 2

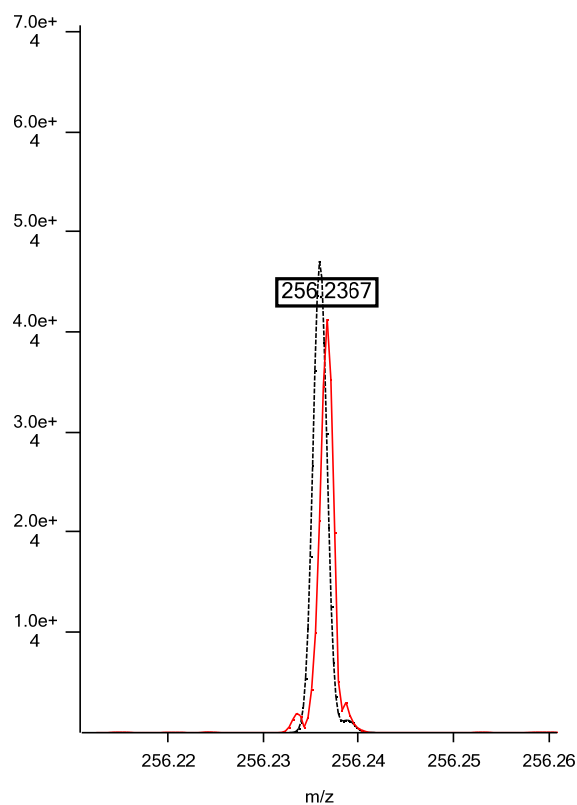

Isotope 3

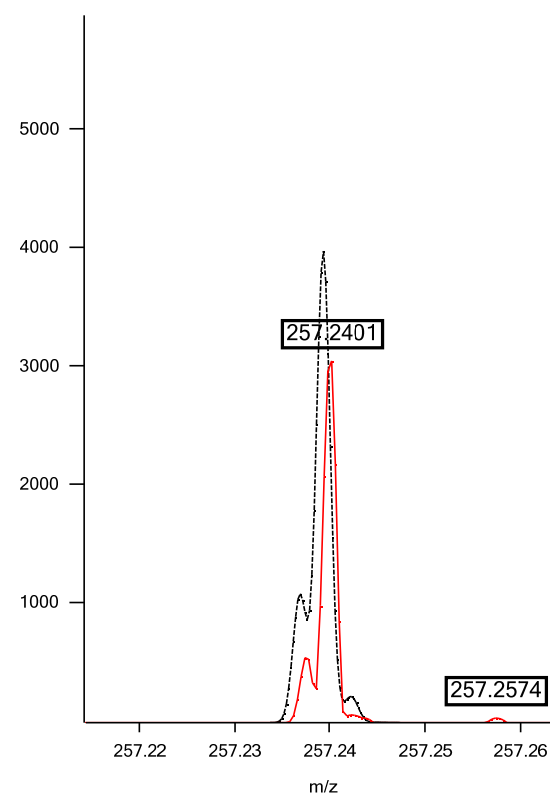

Negative ESI: FA 16:1; C<sub>16</sub>H<sub>29</sub>O<sub>2</sub>; theoretical *m/z* 255.2324, (M-H)<sup>-</sup>; isotopic fit 0.0823

Isotope 1

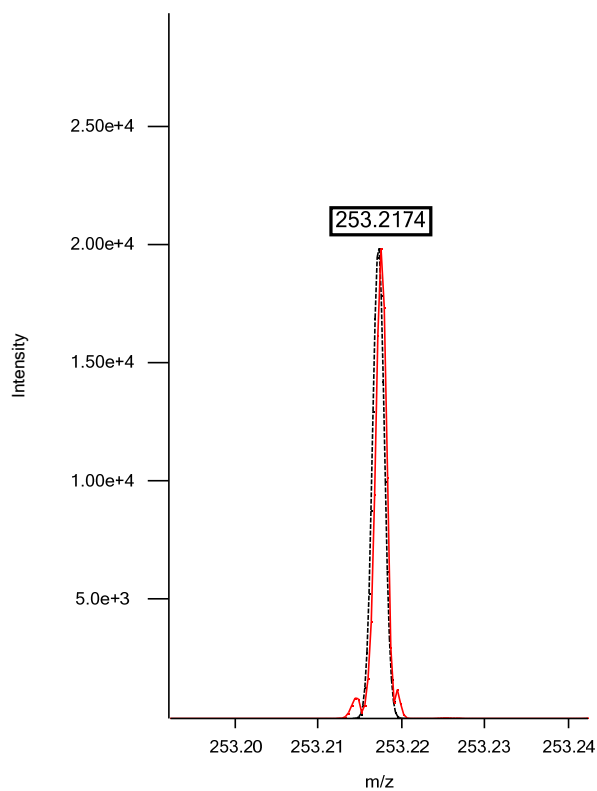

Isotope 2

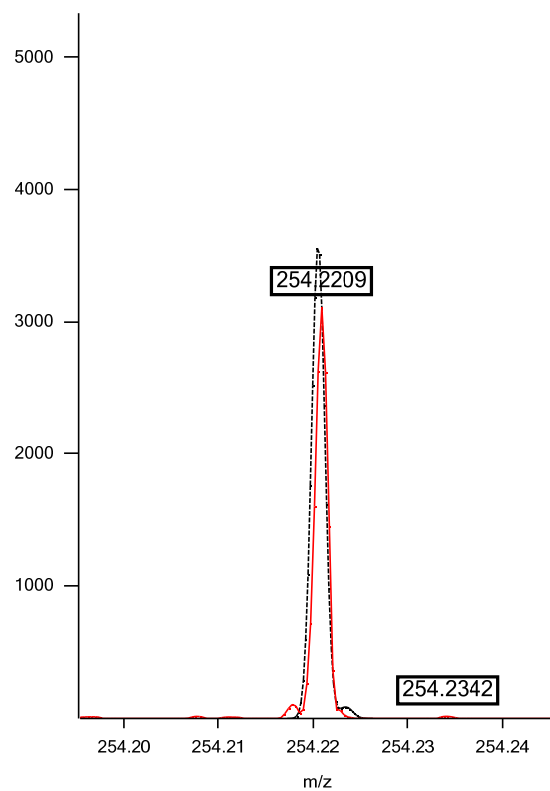

Isotope 3

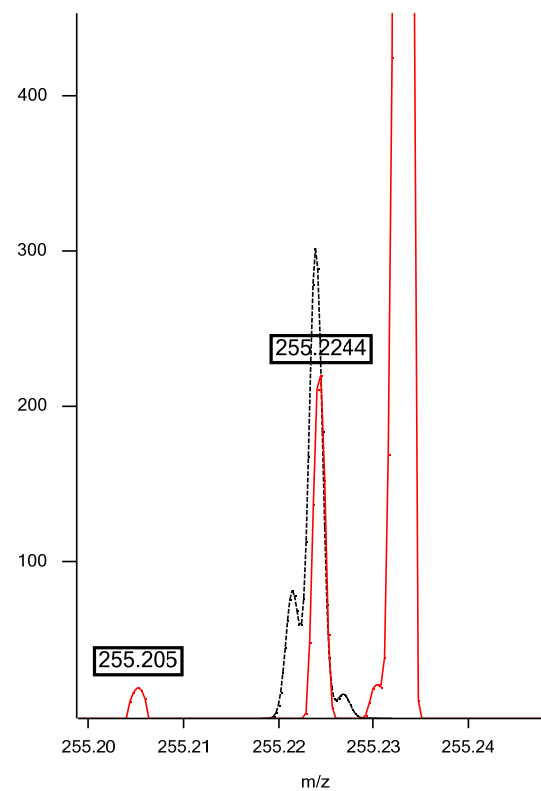

Negative ESI: FA 17:0;  $C_{17}H_{33}O_2$ ; theoretical  $m/z$  269.2481, (M-H)<sup>-</sup>; isotopic fit 0.1045

Isotope 1

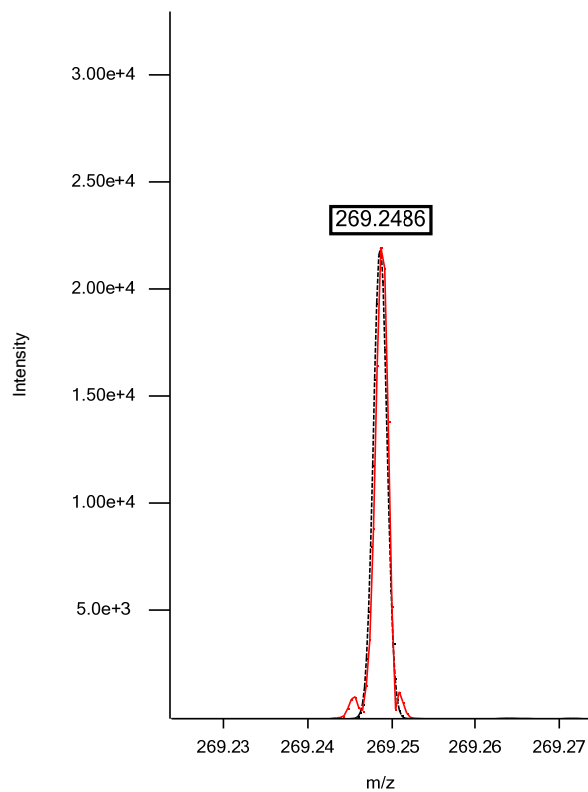

Isotope 2

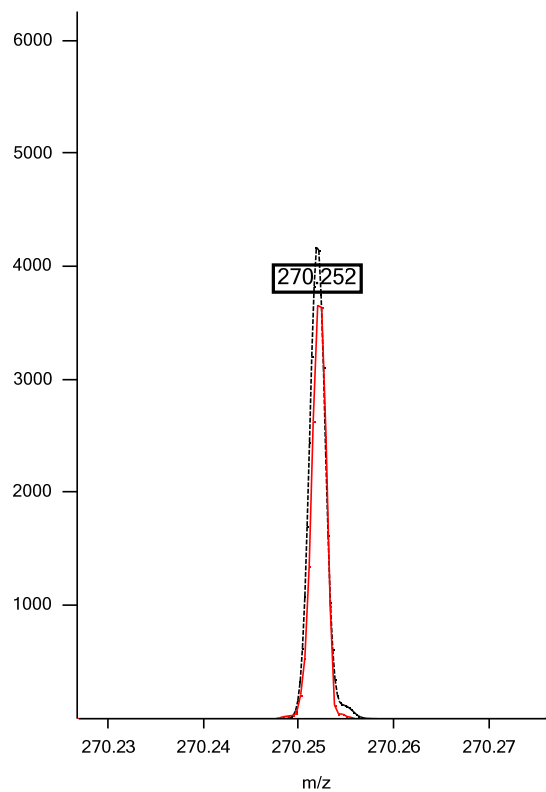

Isotope 3

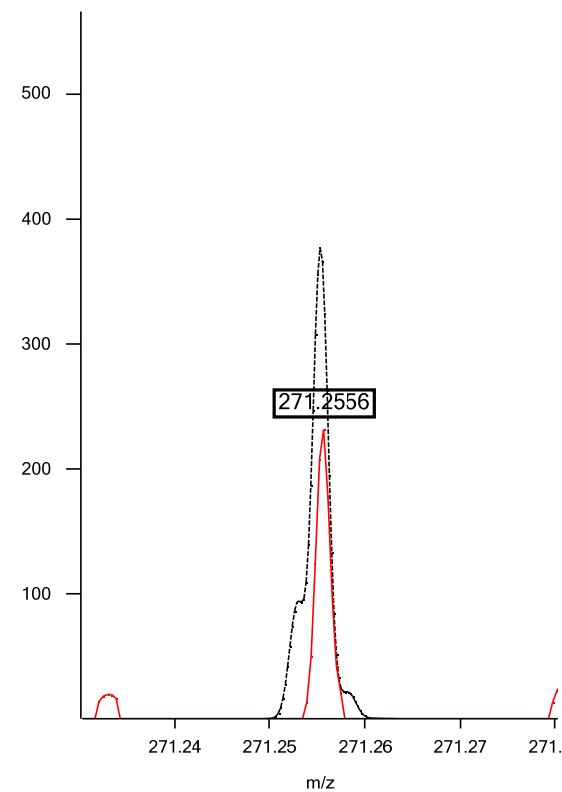

Negative ESI: FA 18:0; C<sub>18</sub>H<sub>35</sub>O<sub>2</sub>; theoretical *m/z* 283.2637, (M-H)<sup>-</sup>; isotopic fit 0.1743

Isotope 1

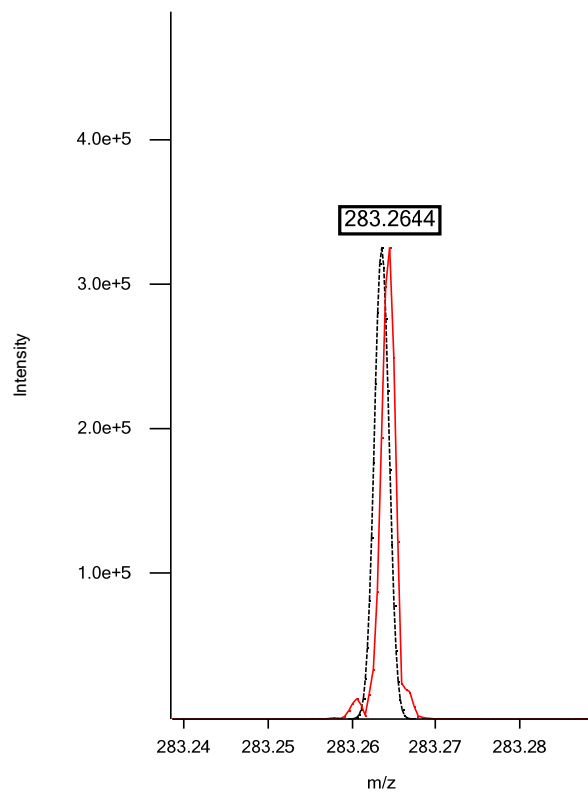

Isotope 2

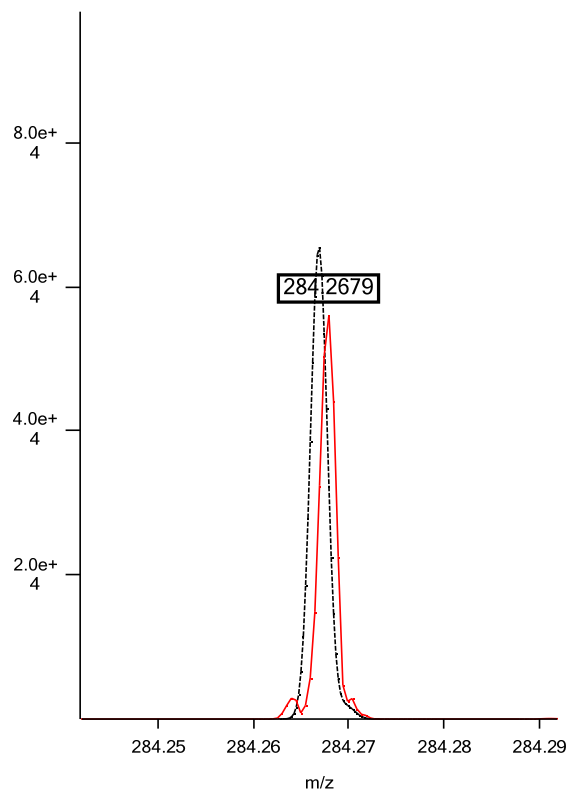

Isotope 3

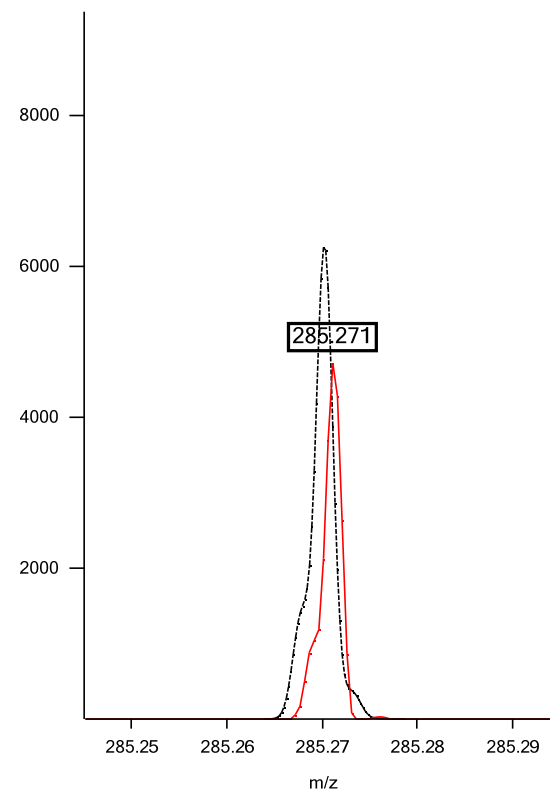



Negative ESI: FA 18:1; C<sub>18</sub>H<sub>33</sub>O<sub>2</sub>; theoretical *m/z* 281.2481, (M-H)<sup>-</sup>; isotopic fit 0.2398

Isotope 1

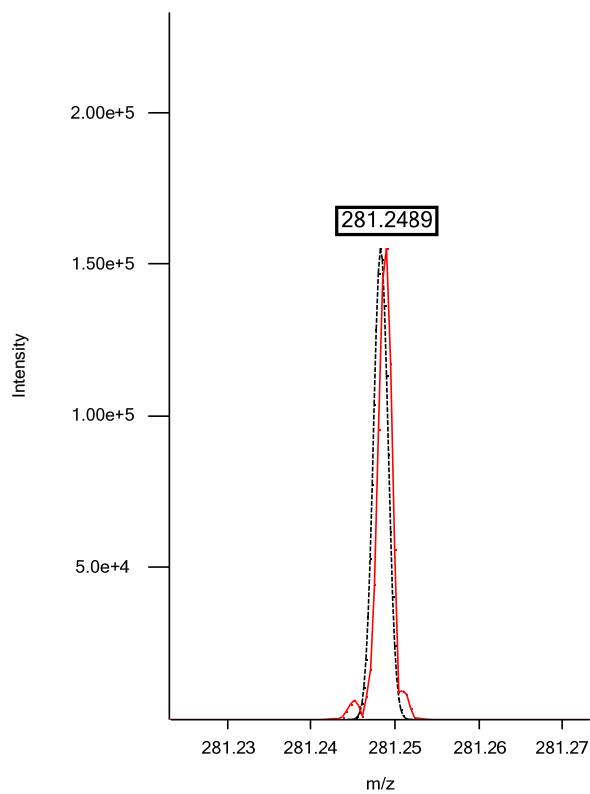

Isotope 2

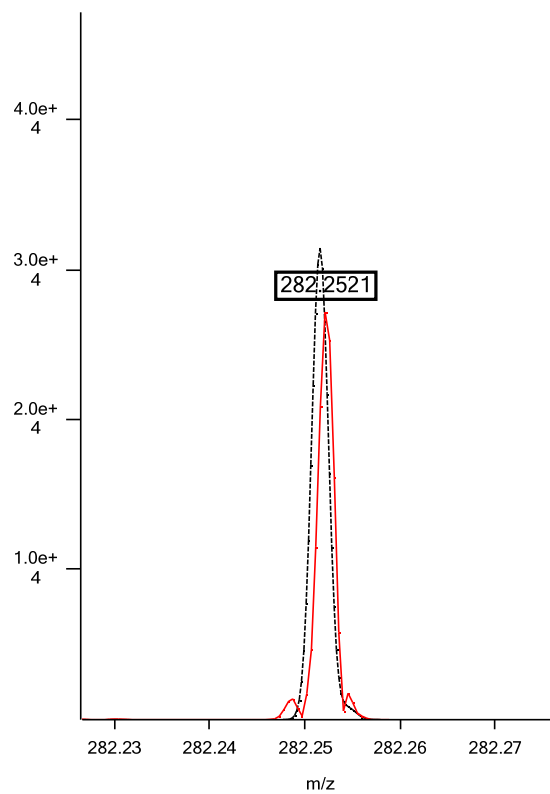

Isotope 3

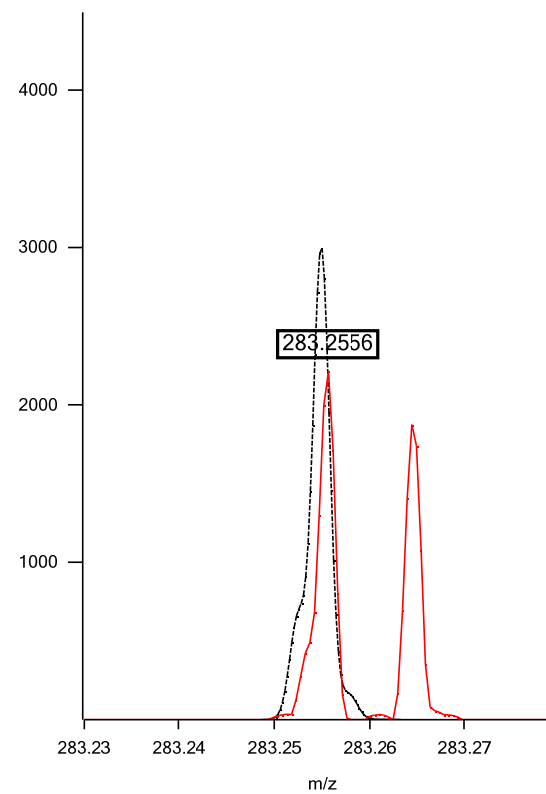

Negative ESI: FA 18:2; C<sub>18</sub>H<sub>31</sub>O<sub>2</sub>; theoretical *m/z* 279.2324, (M-H)<sup>-</sup>; isotopic fit 0.1243

Isotope 1

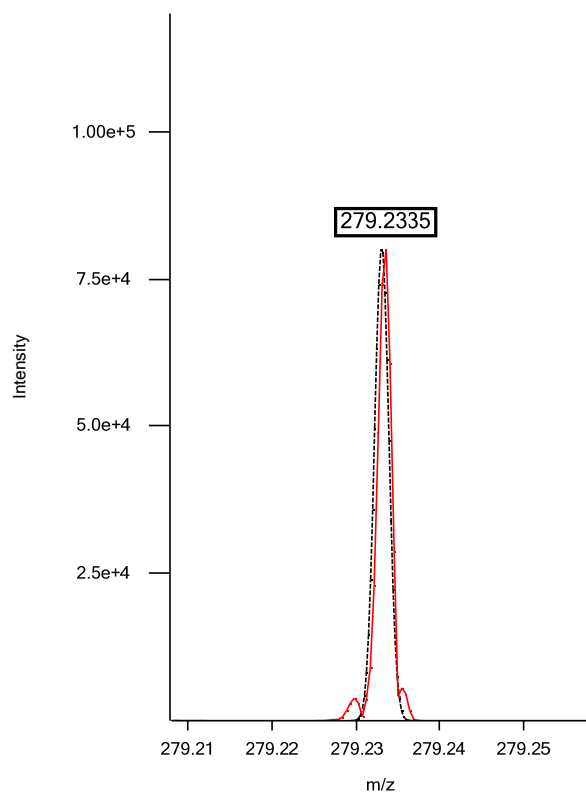

Isotope 2

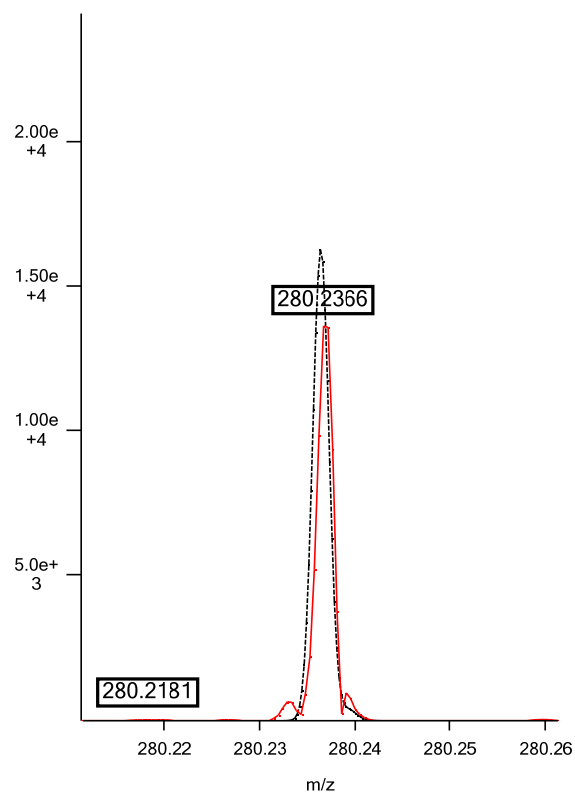

Isotope 3

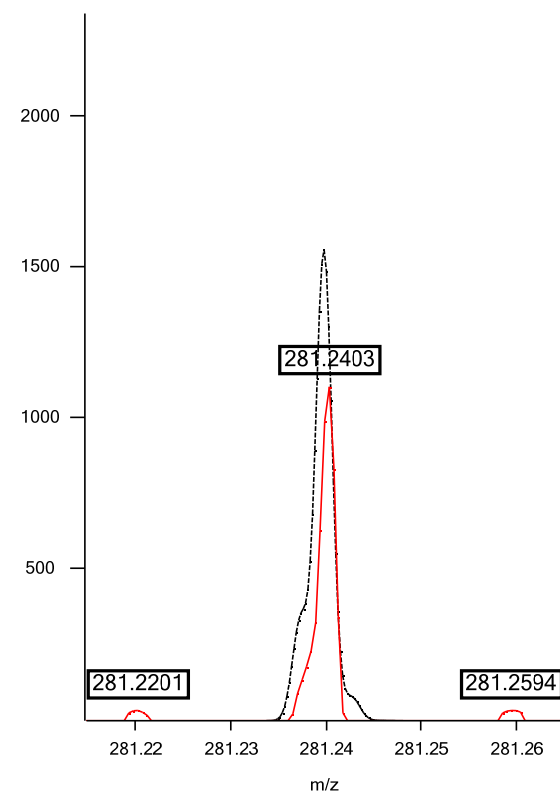

Negative ESI: FA 20:0; C<sub>20</sub>H<sub>39</sub>O<sub>2</sub>; theoretical *m/z* 311.2950, (M-H)<sup>-</sup>; isotopic fit 0.0537

### Isotope 1

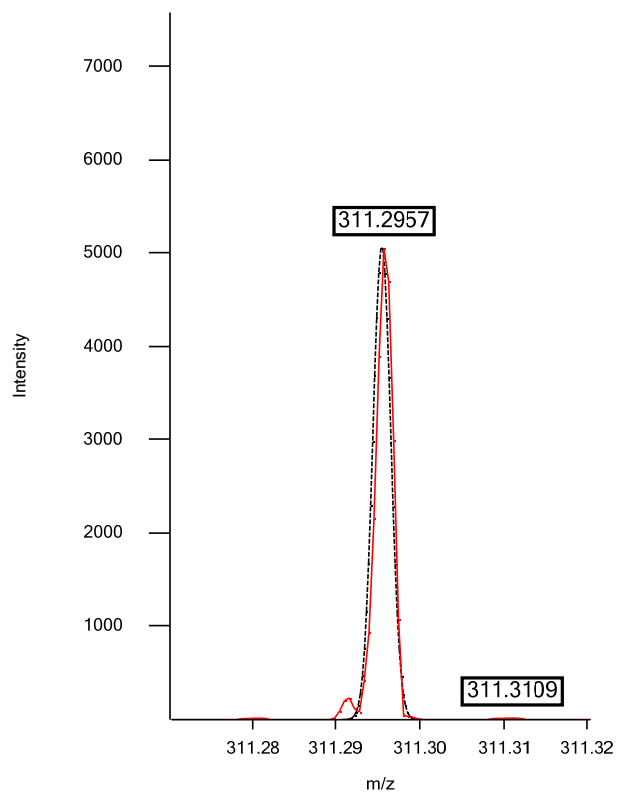

### Isotope 2

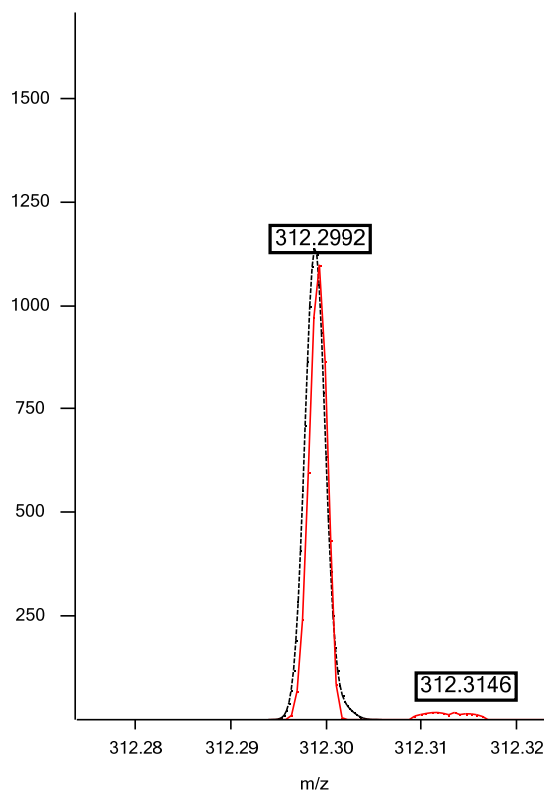

### Isotope 3

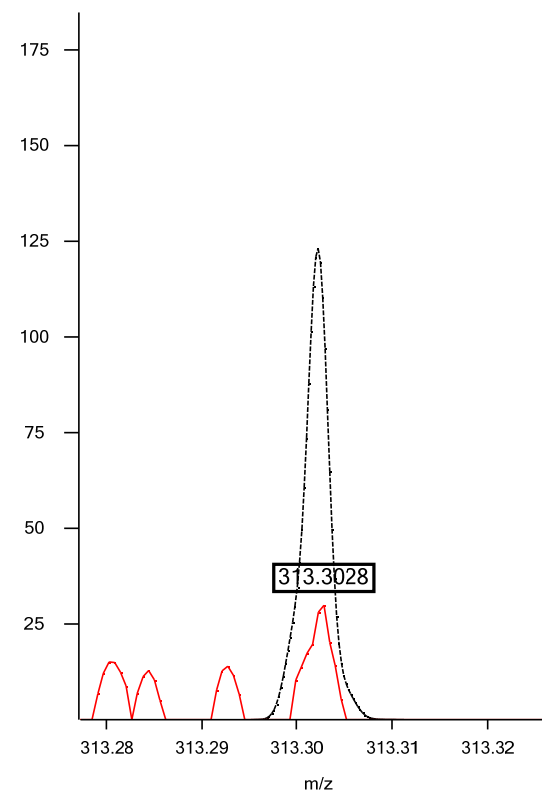

Negative ESI: FA 21:0; C<sub>21</sub>H<sub>41</sub>O<sub>2</sub>; theoretical *m/z* 325.3107, (M-H)<sup>-</sup>; isotopic fit 0.0139

Isotope 1

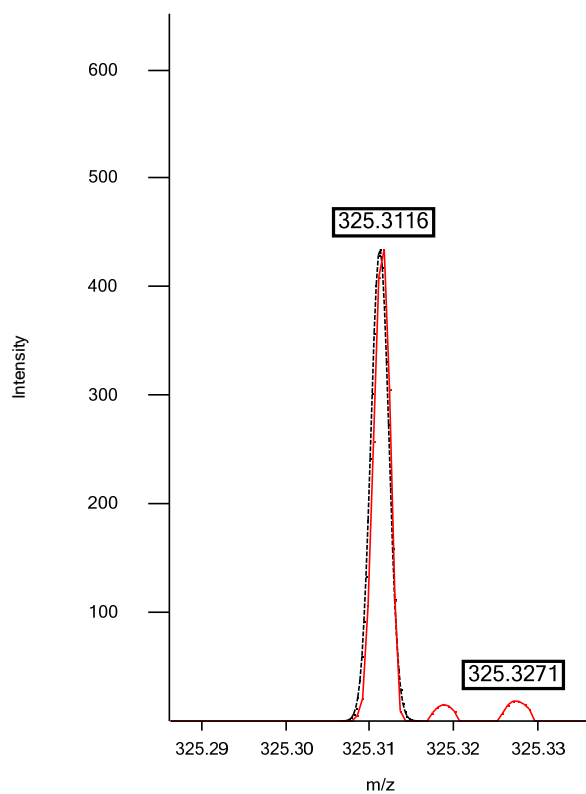

Isotope 2

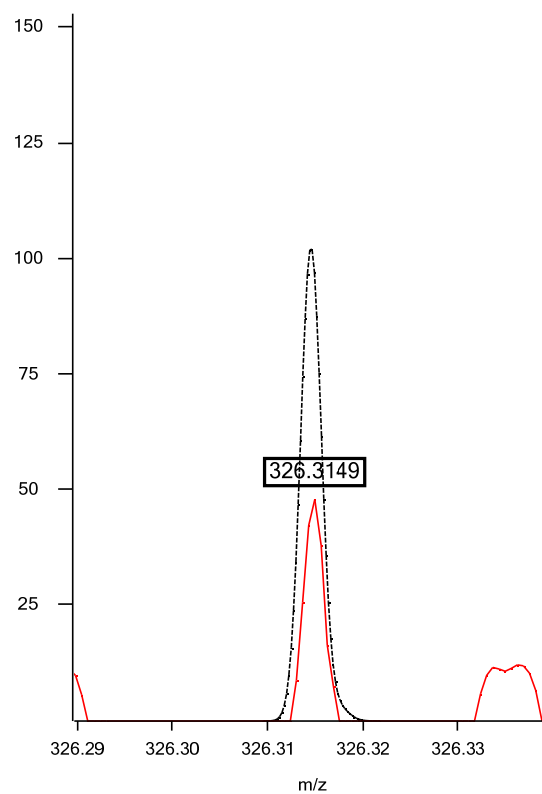

Isotope 3

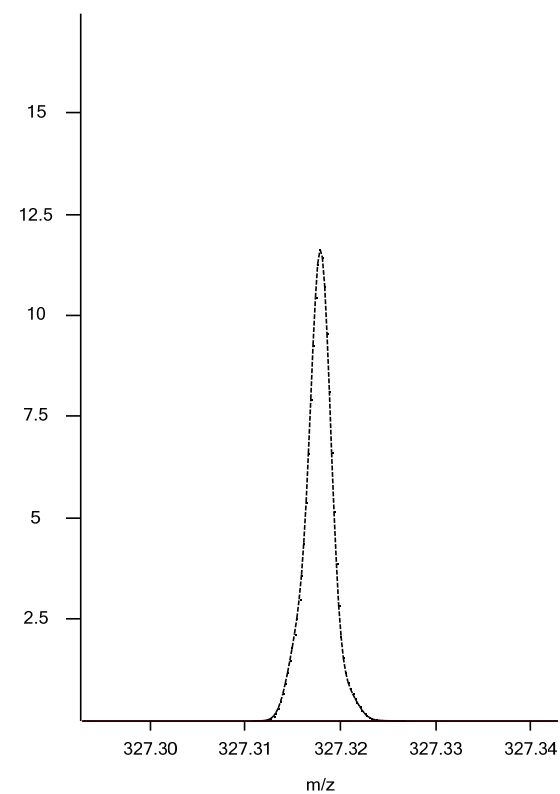

Negative ESI: FA 22:0; C<sub>22</sub>H<sub>43</sub>O<sub>2</sub>; theoretical *m/z* 339.3263, (M-H)<sup>-</sup>; isotopic fit 0.0174

Isotope 1

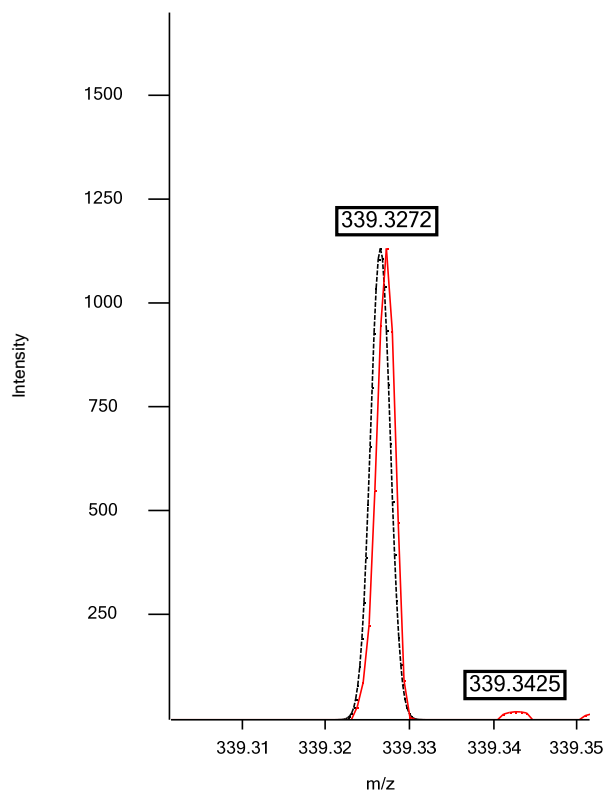

Isotope 2

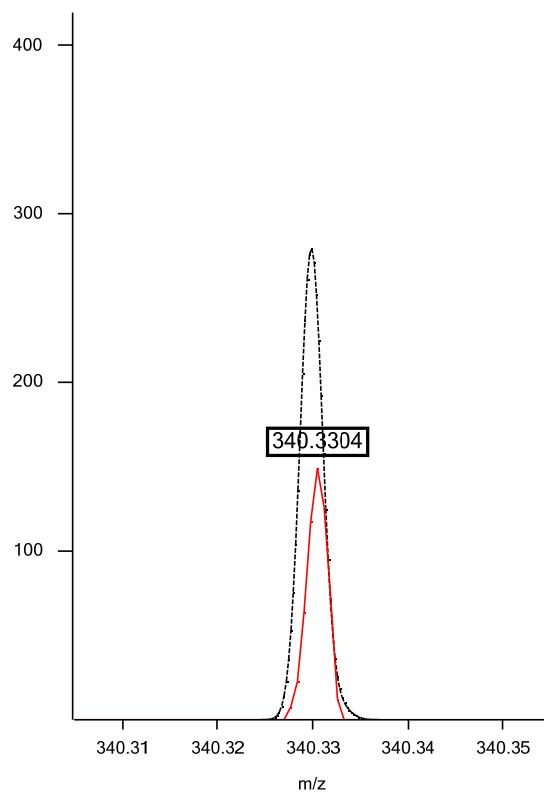

Isotope 3

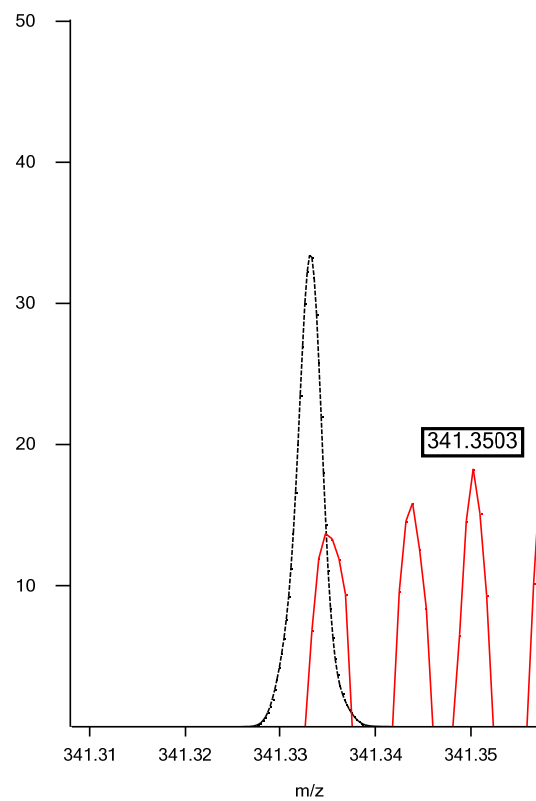

Negative ESI: FA 24:0; C<sub>24</sub>H<sub>47</sub>O<sub>2</sub>; theoretical *m/z* 367.3576, (M-H)<sup>-</sup>; isotopic fit 0.0151

Isotope 1

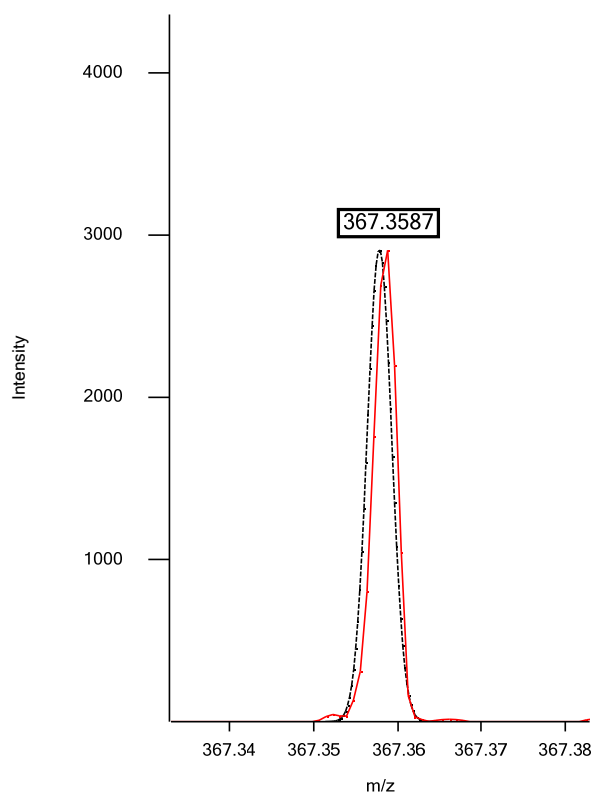

Isotope 2

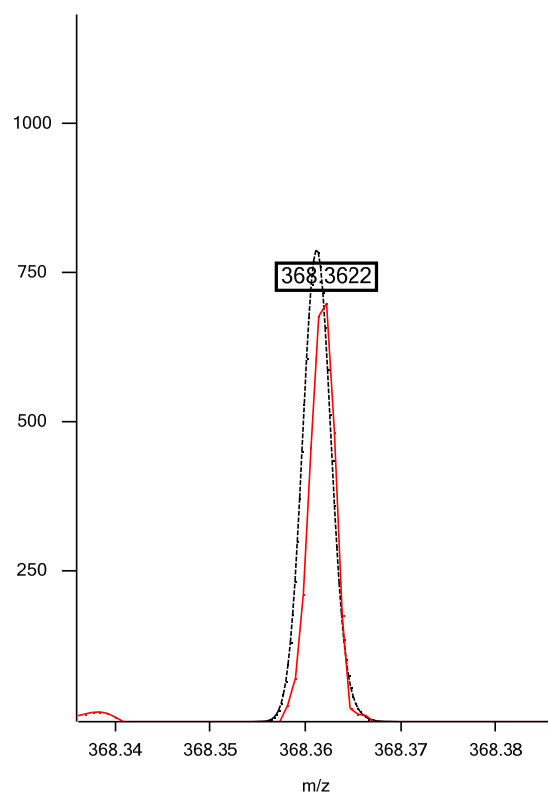

Isotope 3

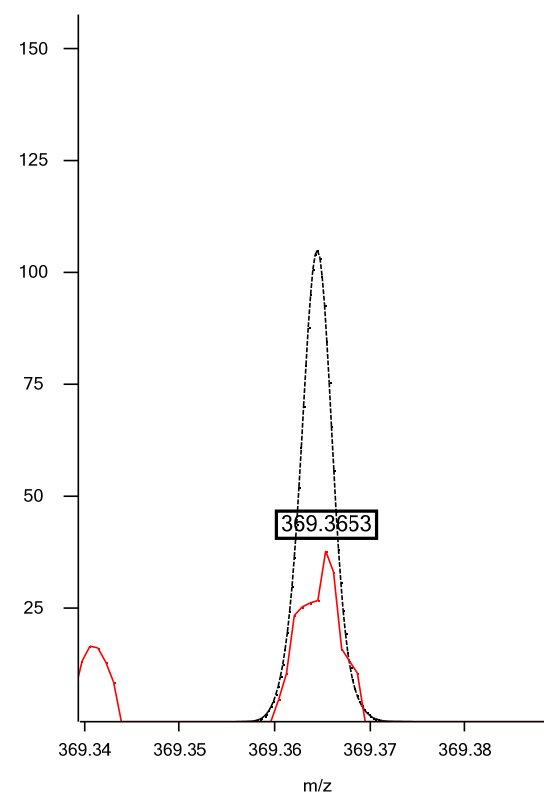

Negative ESI: FA 25:0; C<sub>25</sub>H<sub>49</sub>O<sub>2</sub>; theoretical *m/z* 381.3733, (M-H)<sup>-</sup>; isotopic fit 0.0548

Isotope 1

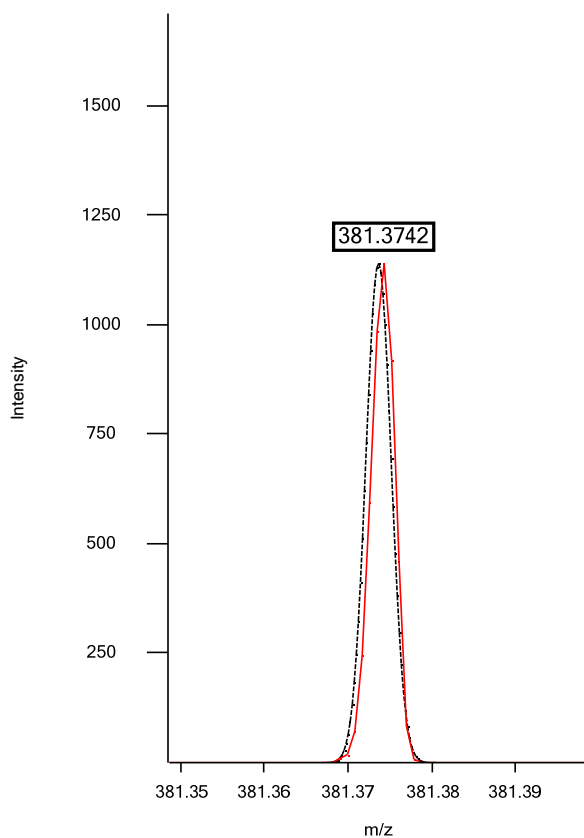

Isotope 2

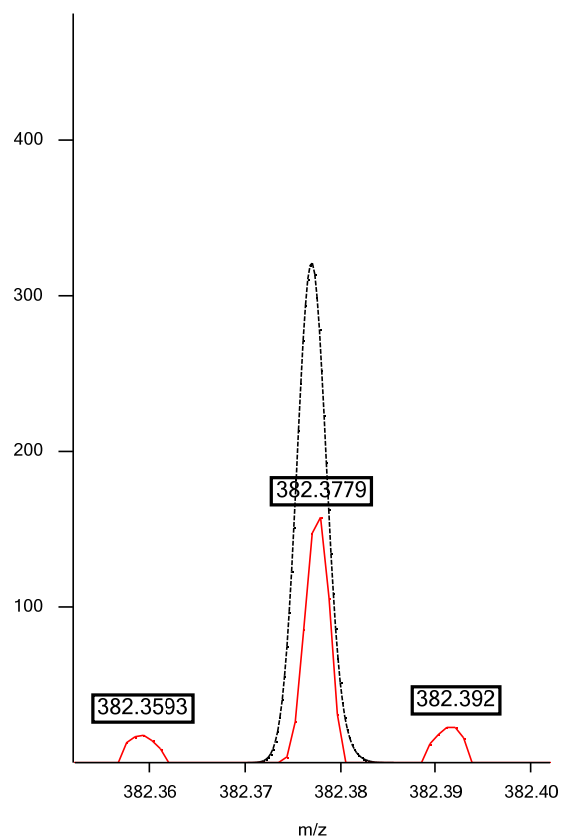

Isotope 3

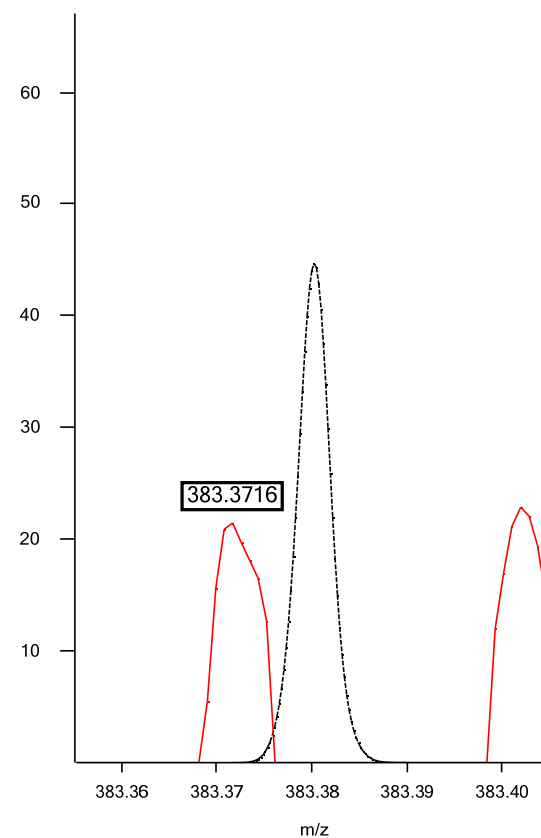

Glycerophosphoinositol



Positive ESI: PI 18:0/20:4; C<sub>47</sub>H<sub>87</sub>NO<sub>13</sub>P; theoretical *m/z* 904.5915, (M+H)<sup>+</sup>; isotopic fit 0.0148

### Isotope 1

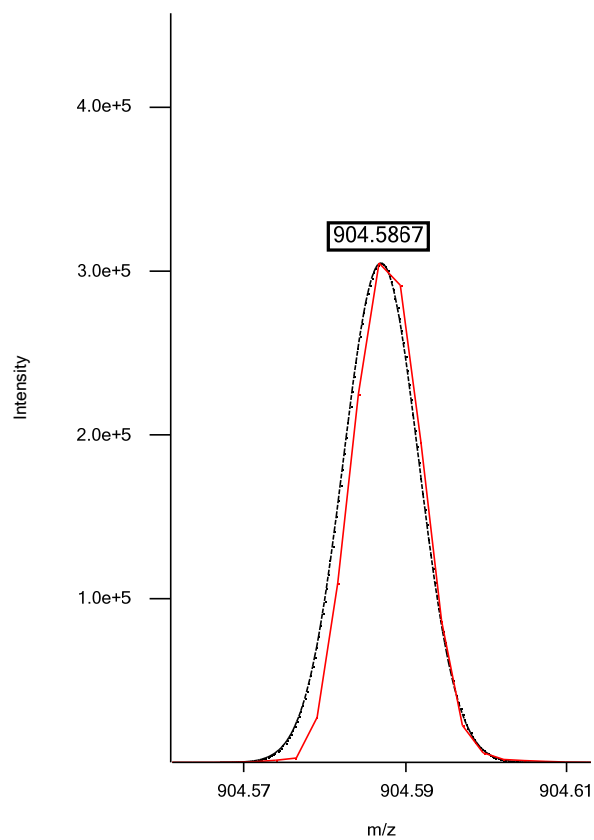

### Isotope 2

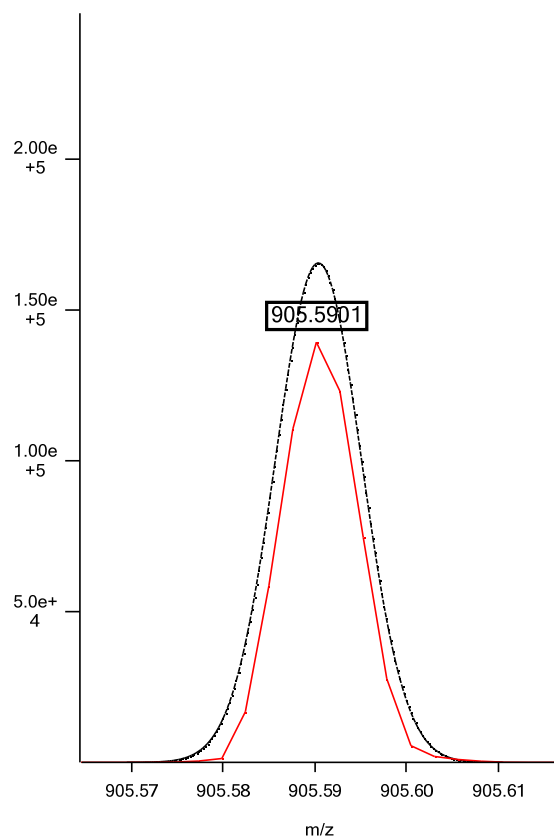

### Isotope 3

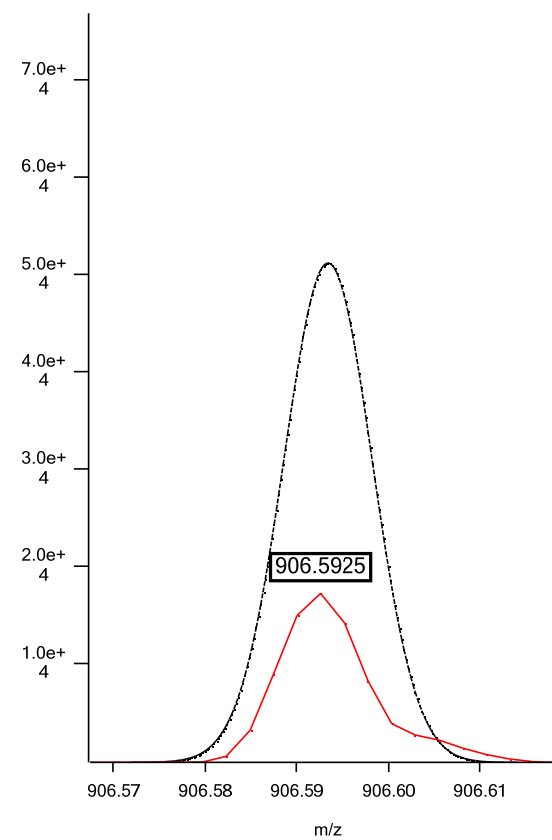

# Glycerophosphoserines

Positive ESI: LPS 18:2; C<sub>24</sub>H<sub>45</sub>NO<sub>9</sub>P; theoretical *m/z* 522.2832, (M+H)<sup>+</sup>; isotopic fit 0.0137

### Isotope 1

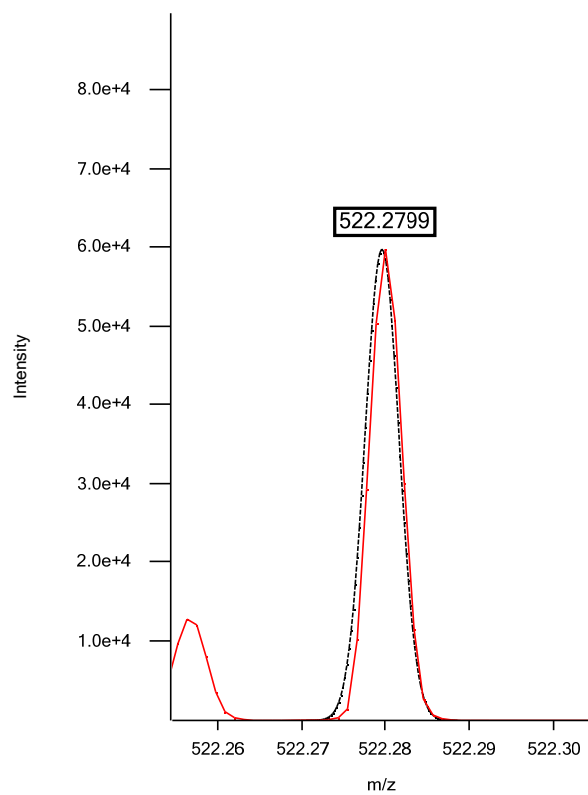

### Isotope 2

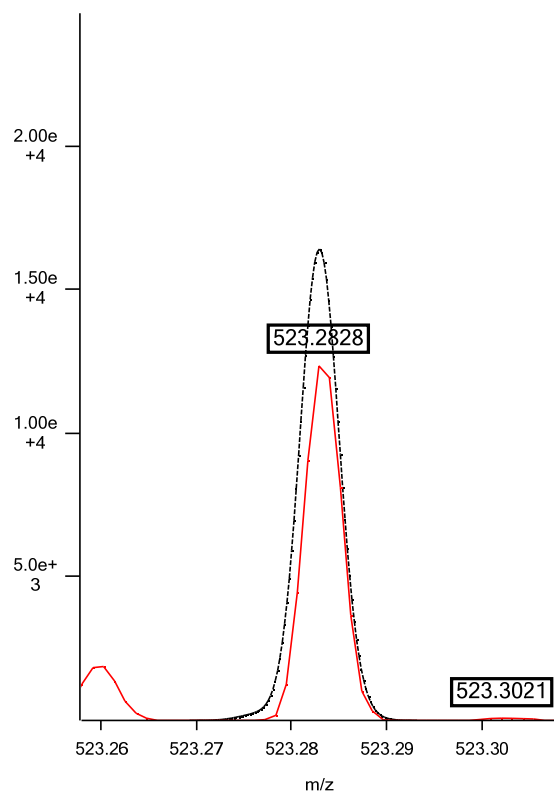

### Isotope 3

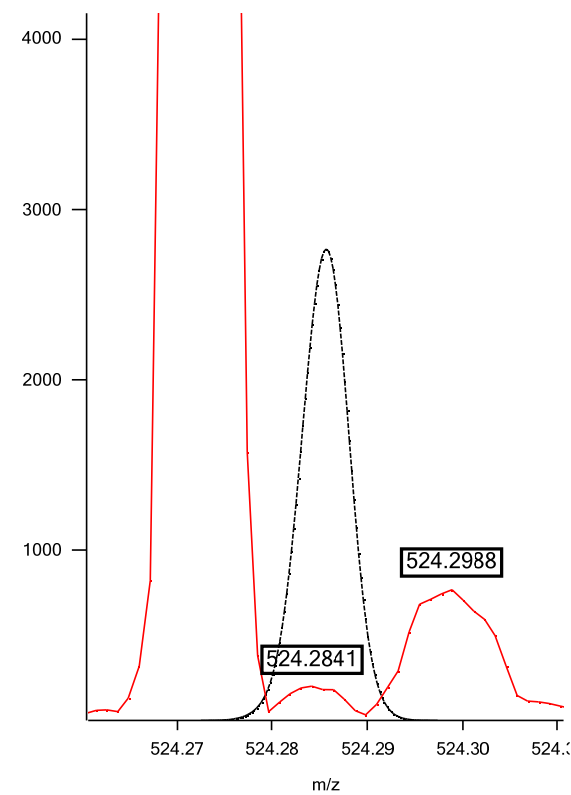

Positive ESI: LPS 18:1;  $C_{24}H_{47}NO_9P$ ; theoretical  $m/z$  524.2988,  $(M+H)^+$ ; isotopic fit 0.0210

### Isotope 1

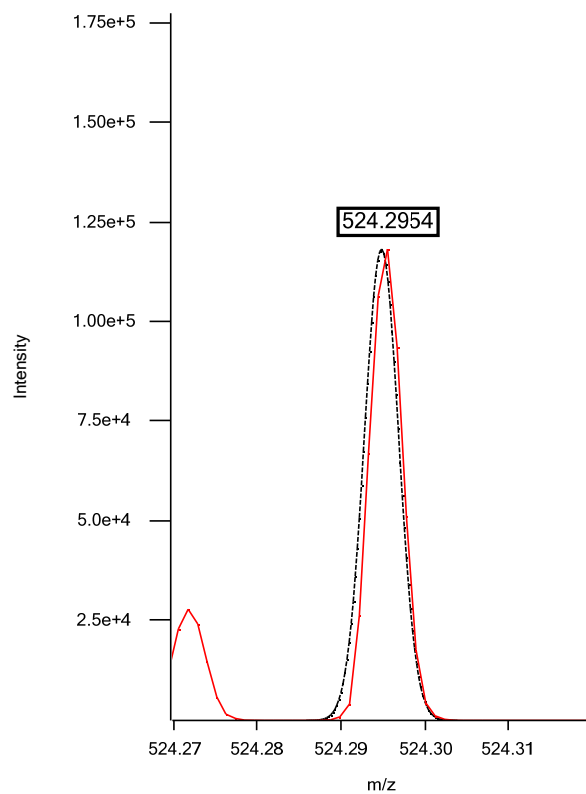

### Isotope 2

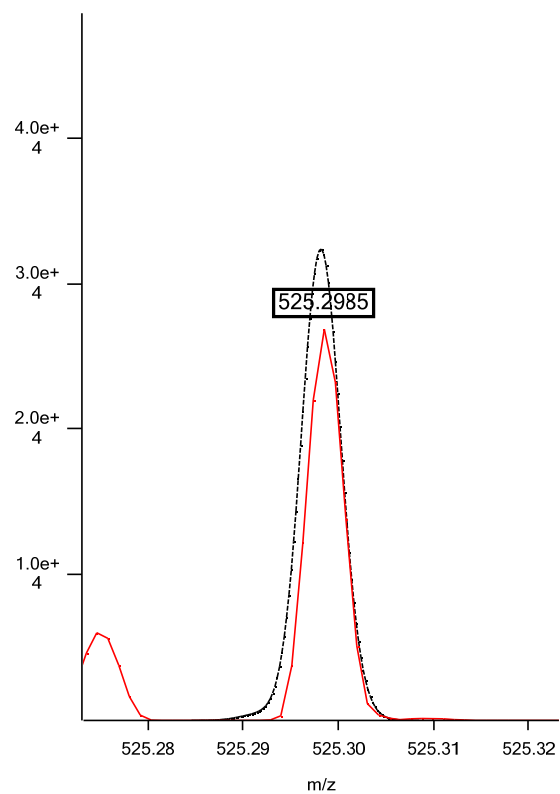

### Isotope 3

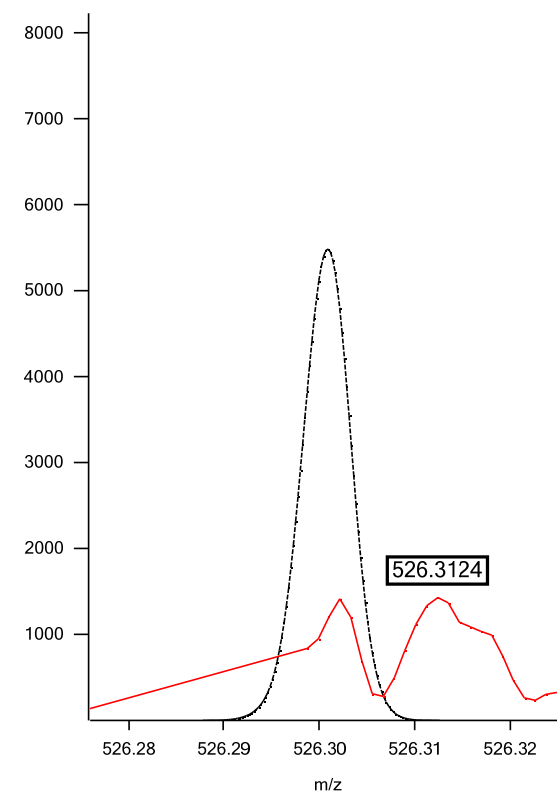

Positive ESI: LPS 18:0; C<sub>24</sub>H<sub>49</sub>NO<sub>9</sub>P; theoretical  $m/z$  526.3145, (M+H)<sup>+</sup>; isotopic fit 0.0075

### Isotope 1

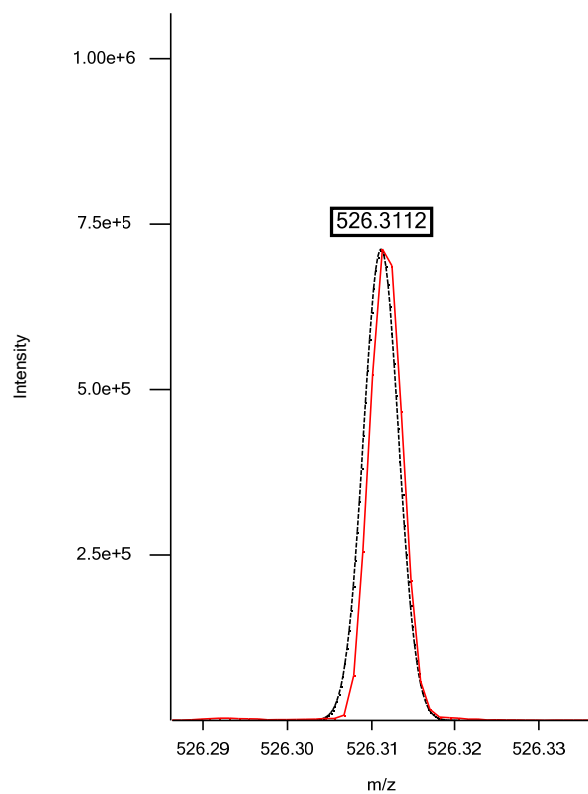

### Isotope 2

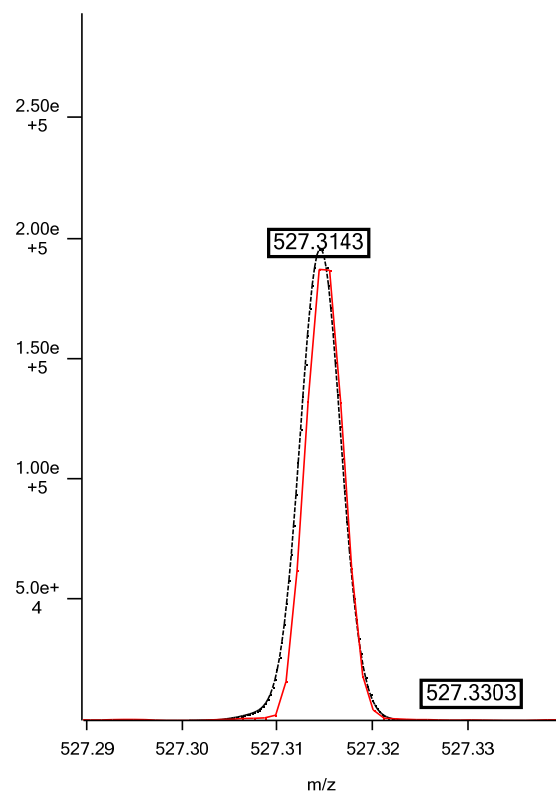

### Isotope 3

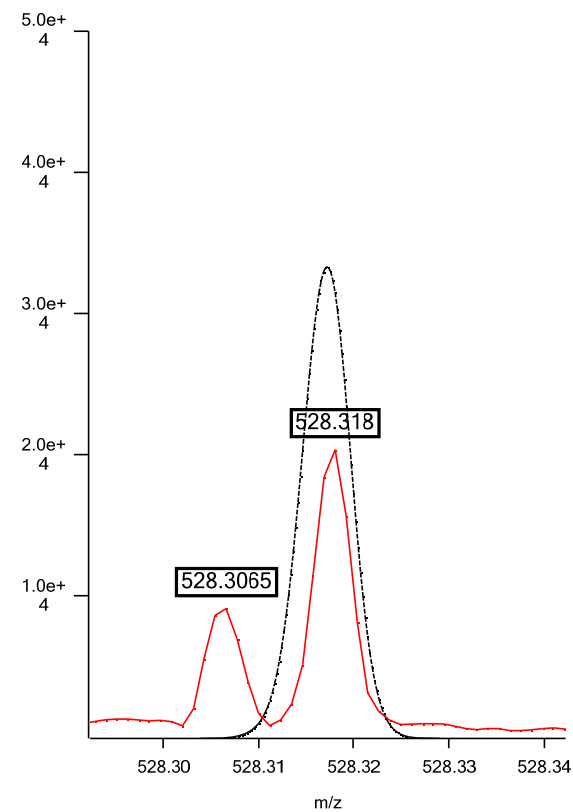

Positive ESI: PS 38:5; C<sub>44</sub>H<sub>77</sub>NO<sub>10</sub>P; theoretical *m/z* 810.5285, (M+H)<sup>+</sup>; isotopic fit 0.0061

### Isotope 1

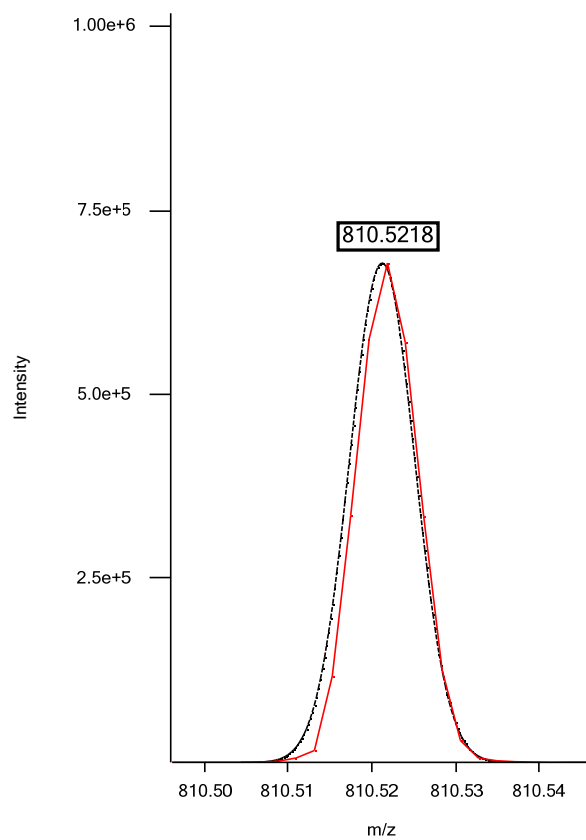

### Isotope 2

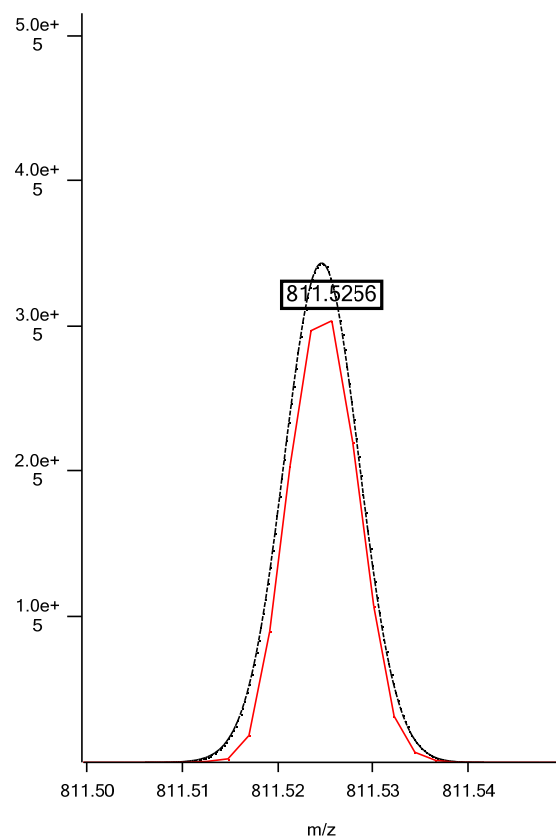

### Isotope 3

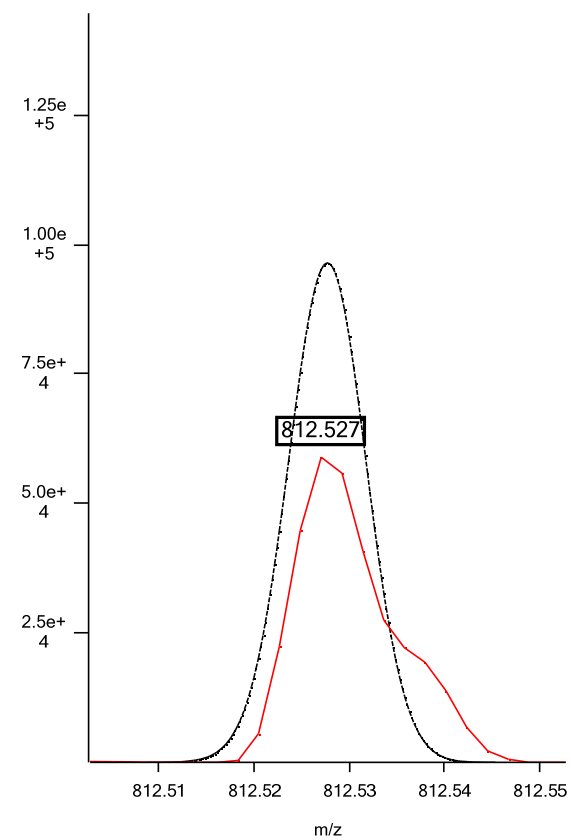

Positive ESI: PS 38:4; C<sub>44</sub>H<sub>79</sub>NO<sub>10</sub>P; theoretical *m/z* 812.5441, (M+H)<sup>+</sup>; isotopic fit 0.0052

### Isotope 1

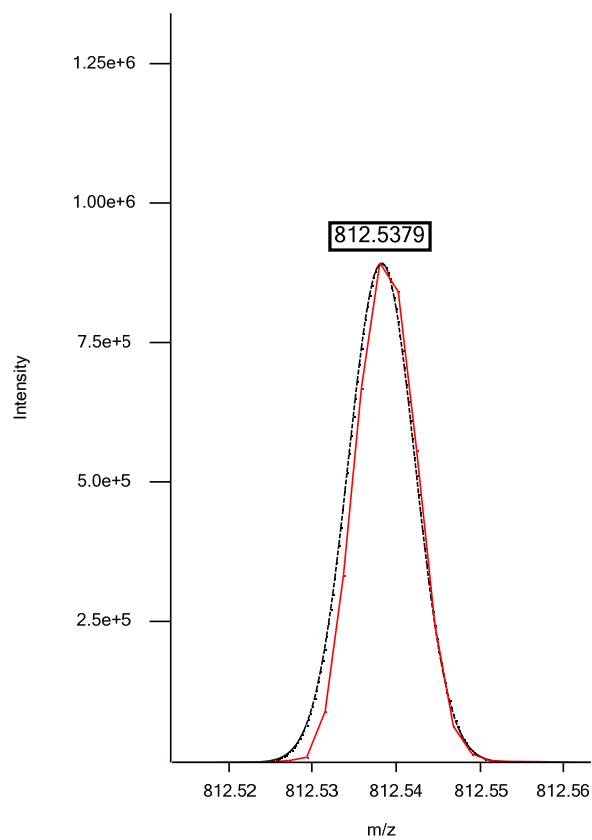

### Isotope 2

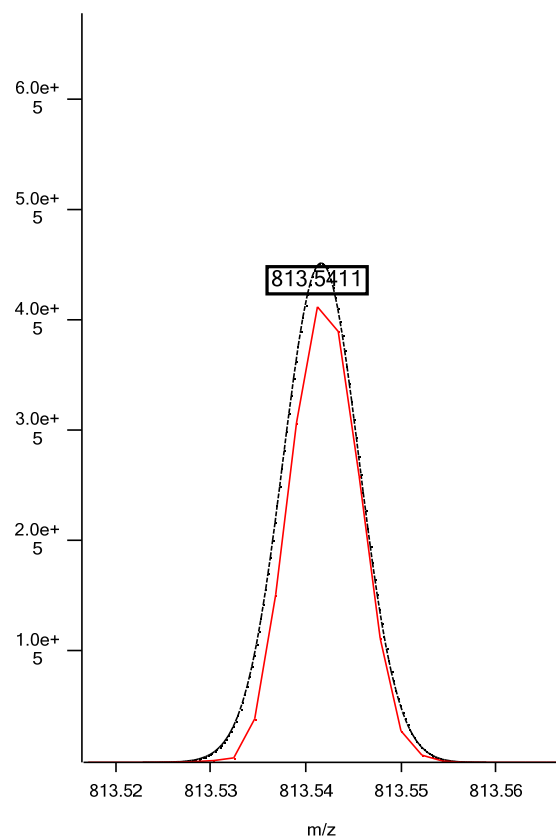

### Isotope 3

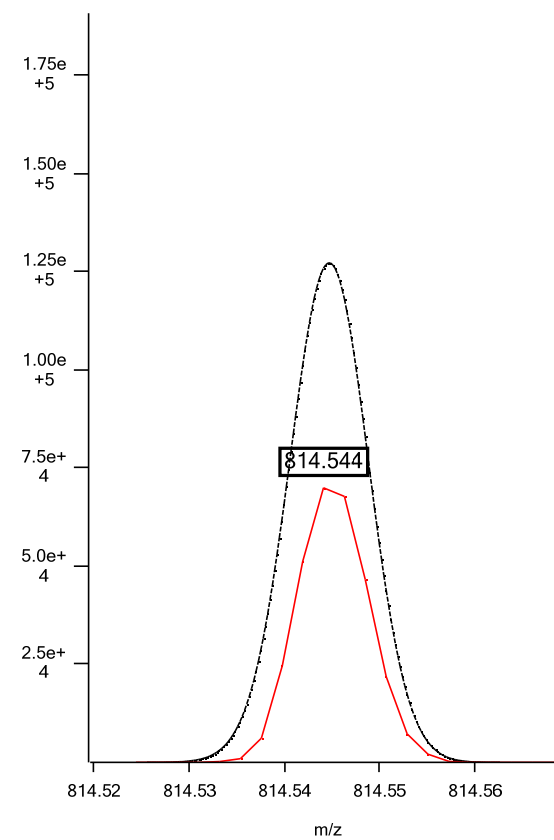

Positive ESI: PS 40:6; C<sub>46</sub>H<sub>79</sub>NO<sub>10</sub>P; theoretical *m/z* 836.5441, (M+H)<sup>+</sup>; isotopic fit 0.0044

### Isotope 1

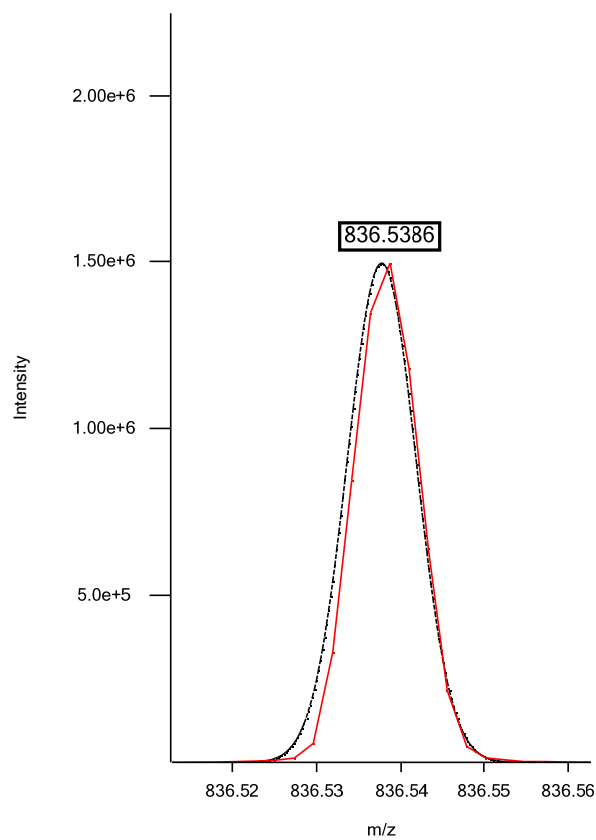

### Isotope 2

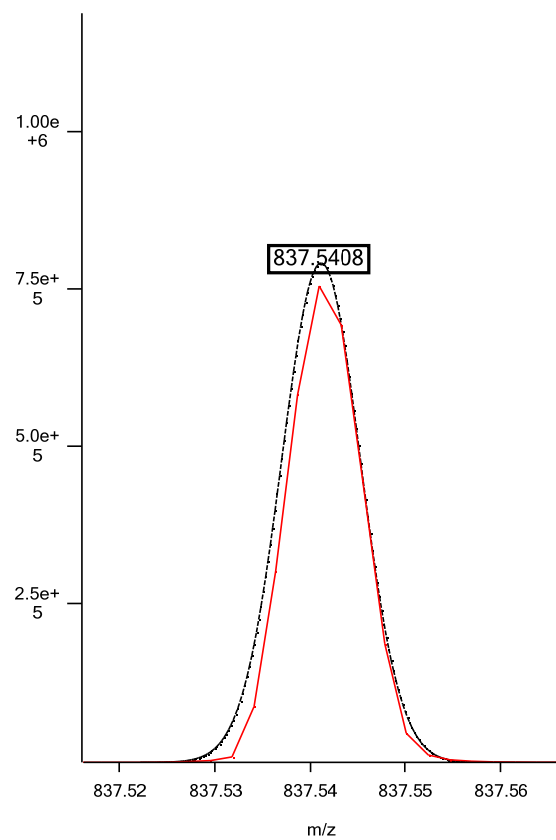

### Isotope 3

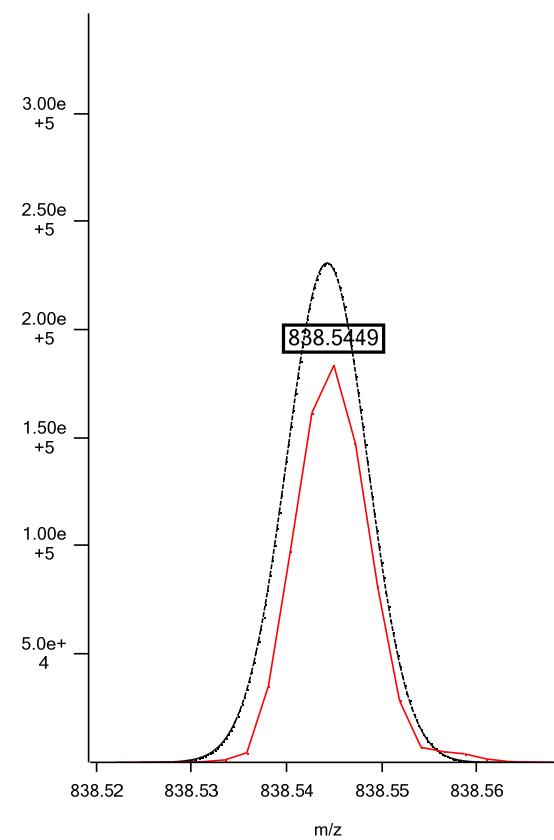



Positive ESI: PS 40:5; C<sub>46</sub>H<sub>81</sub>NO<sub>10</sub>P; theoretical *m/z* 838.5598, (M+H)<sup>+</sup>; isotopic fit 0.0107

### Isotope 1

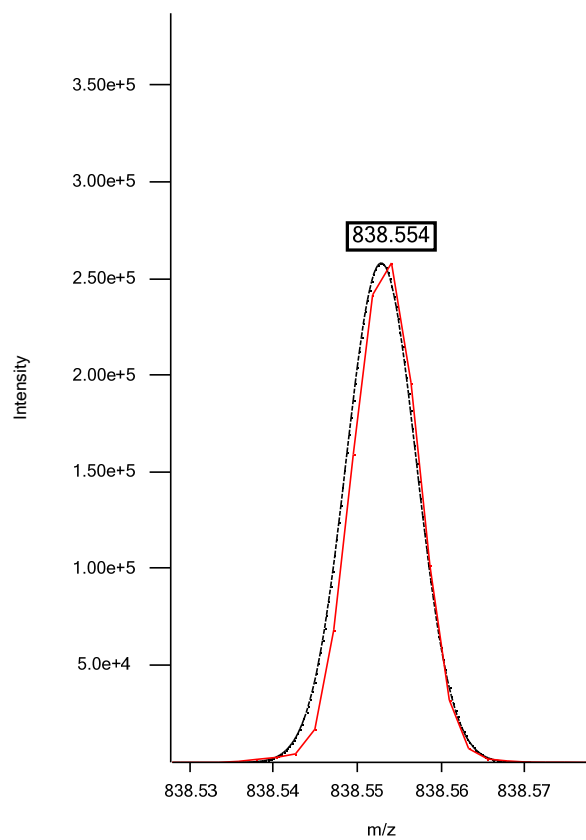

### Isotope 2

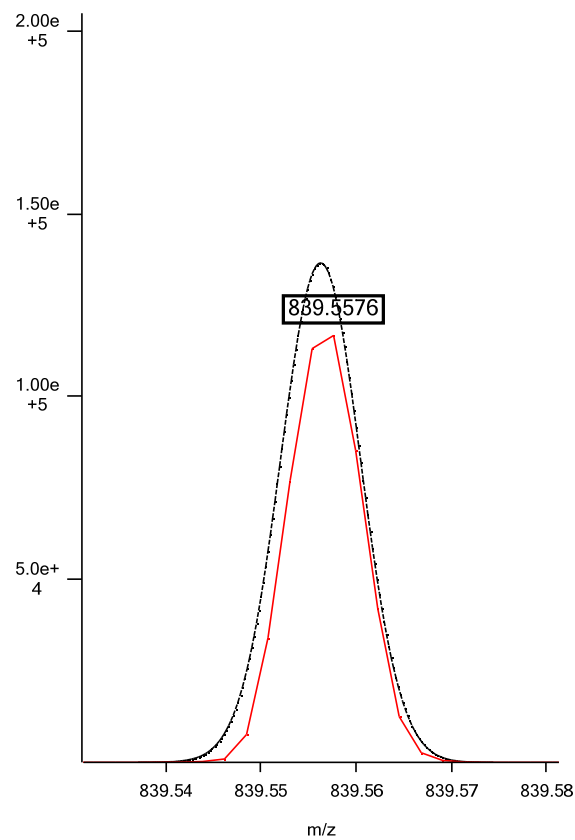

### Isotope 3

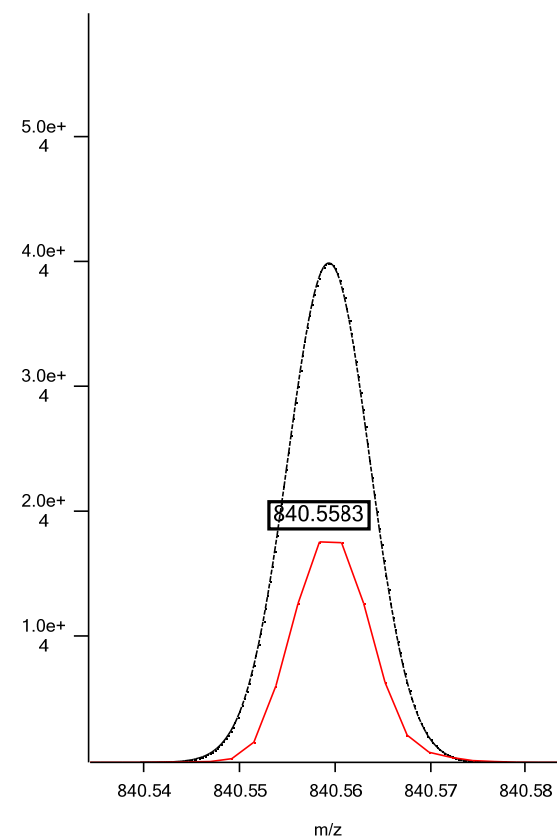

Positive ESI: PS 40:4; C<sub>46</sub>H<sub>83</sub>NO<sub>10</sub>P; theoretical *m/z* 840.5754, (M+H)<sup>+</sup>; isotopic fit 0.0050

### Isotope 1

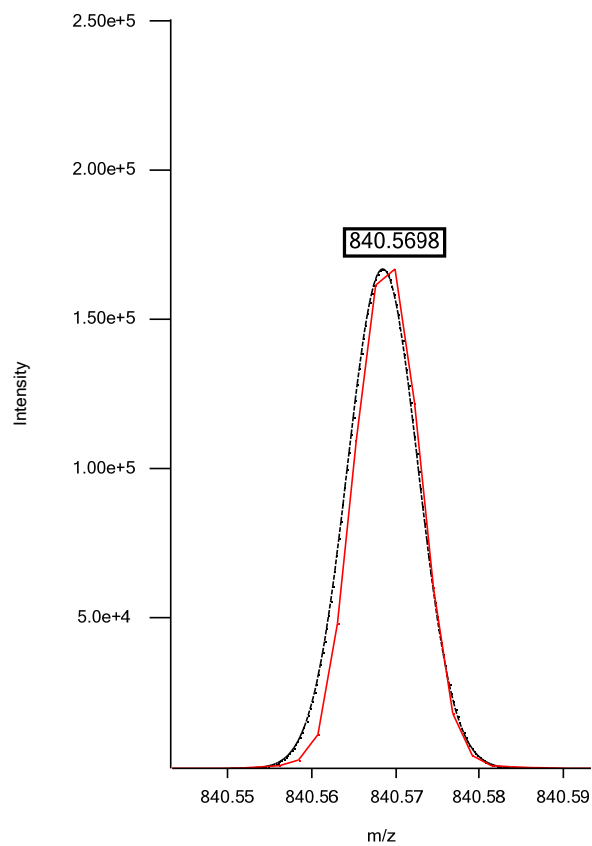

### Isotope 2

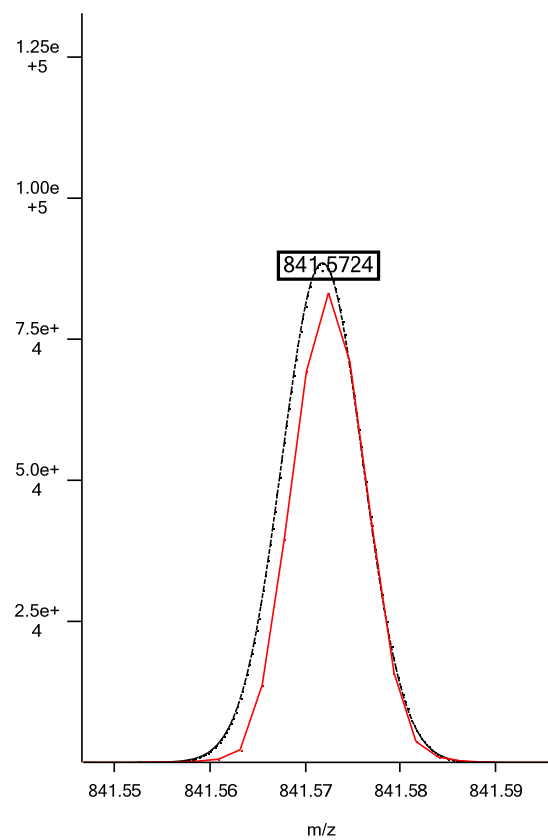

### Isotope 3

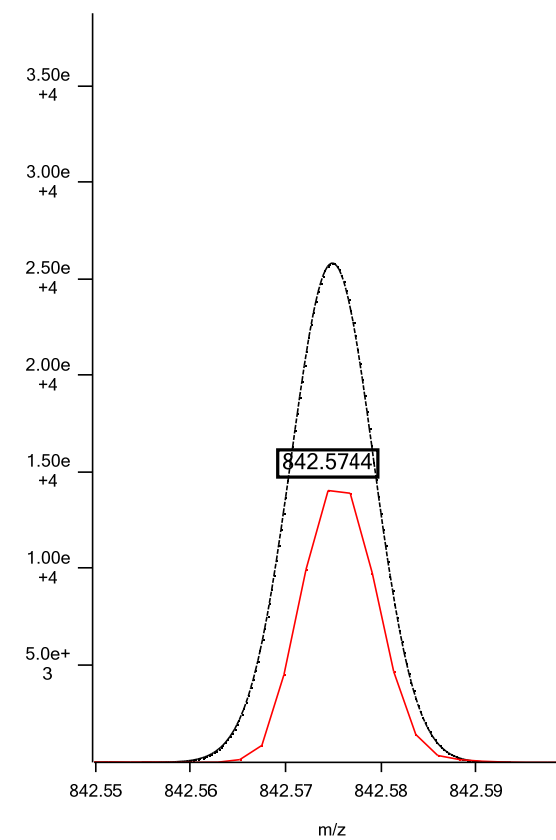

Glycerophosphoethanolamines

Positive ESI: LPE 16:0; C<sub>21</sub>H<sub>45</sub>NO<sub>7</sub>P; theoretical *m/z* 454.2934, (M+H)<sup>+</sup>; isotopic fit 0.0091

### Isotope 1

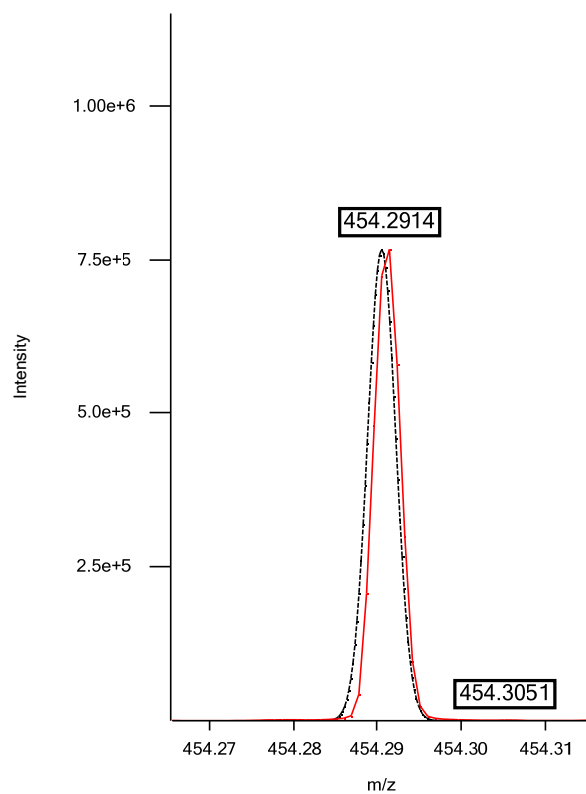

### Isotope 2

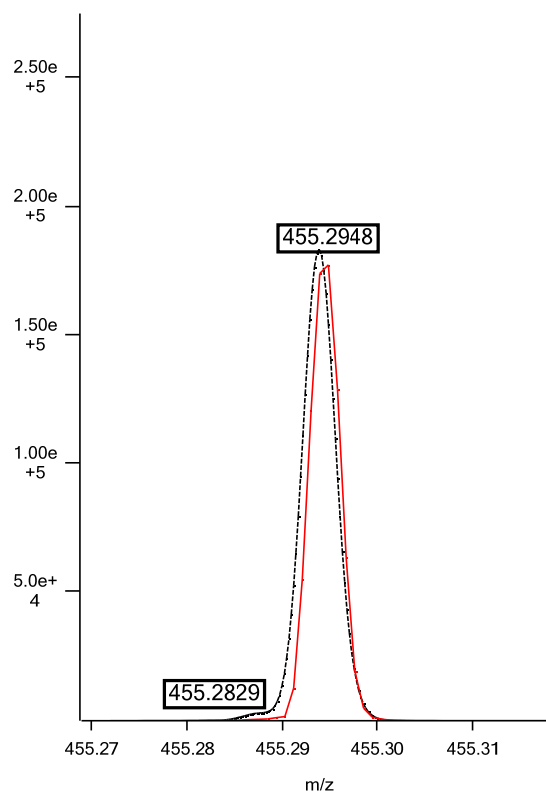

### Isotope 3

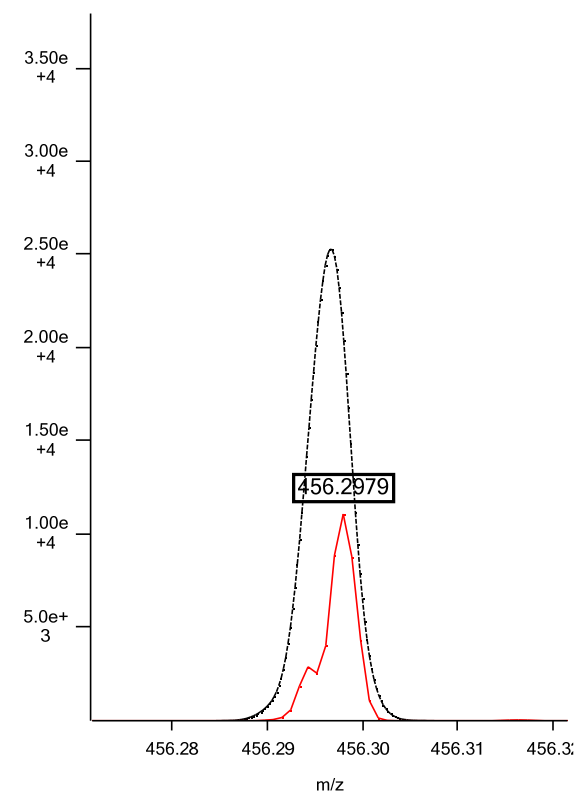

Positive ESI: LPE 16:1; C<sub>21</sub>H<sub>43</sub>NO<sub>7</sub>P; theoretical *m/z* 452.2777, (M+H)<sup>+</sup>; isotopic fit 0.0379

### Isotope 1

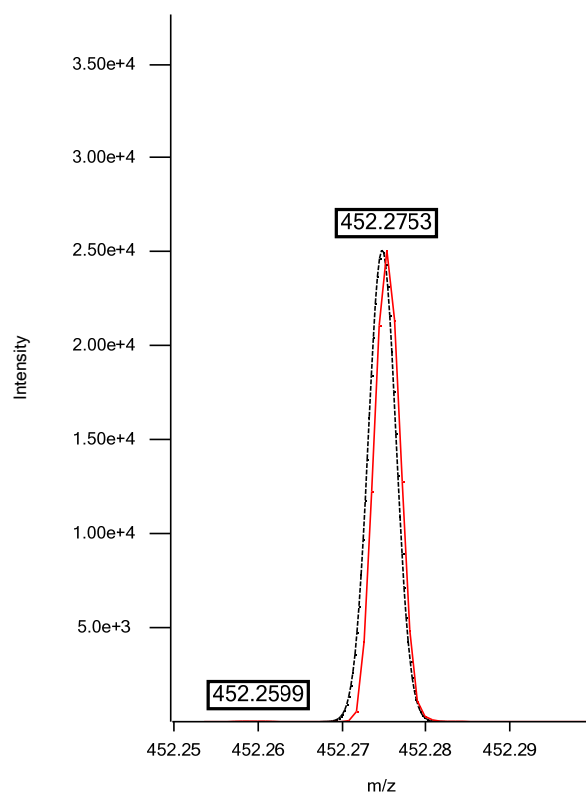

### Isotope 2

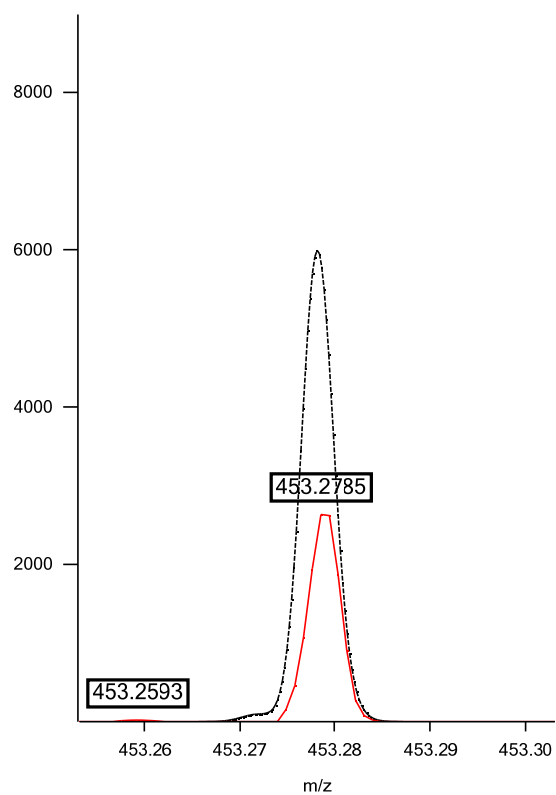

### Isotope 3

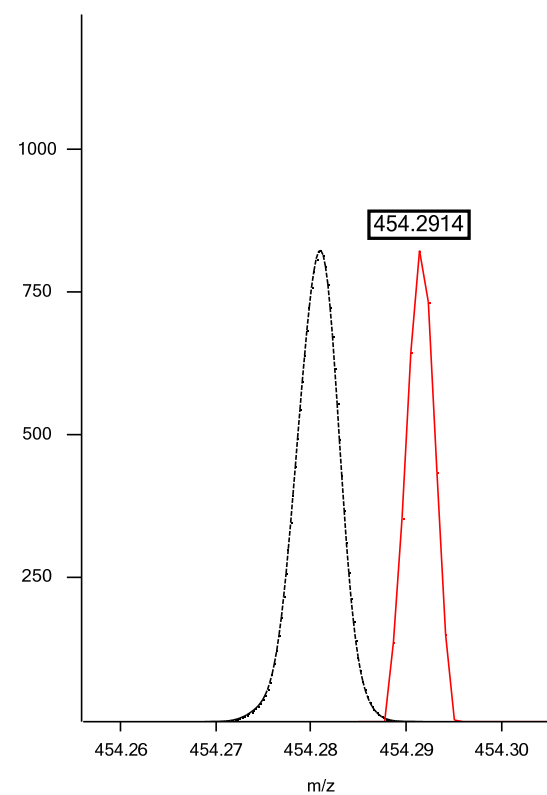

Positive ESI: LPE 18:0; C<sub>23</sub>H<sub>49</sub>NO<sub>7</sub>P; theoretical *m/z* 482.3247, (M+H)<sup>+</sup>; isotopic fit 0.0193

Isotope 1

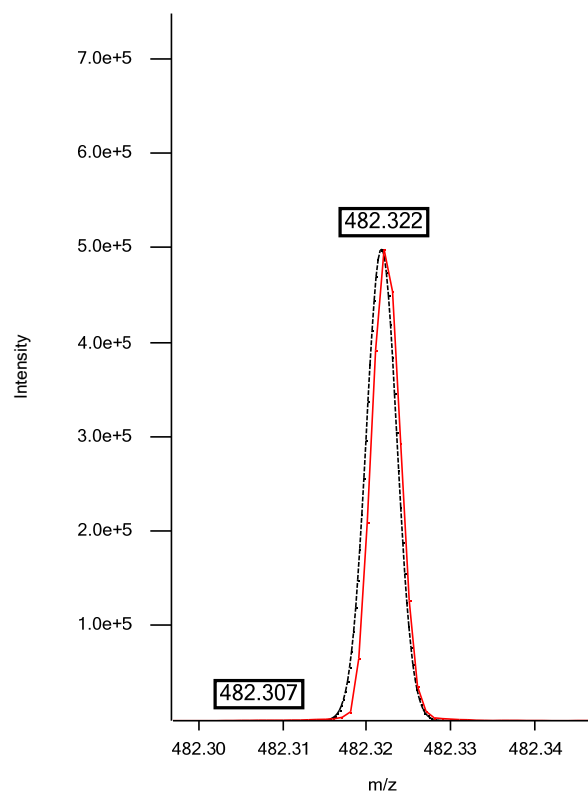

Isotope 2

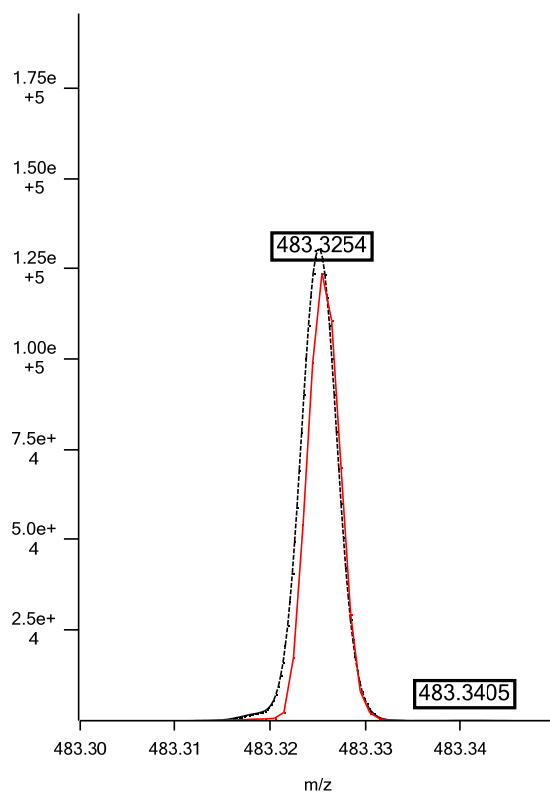

Isotope 3

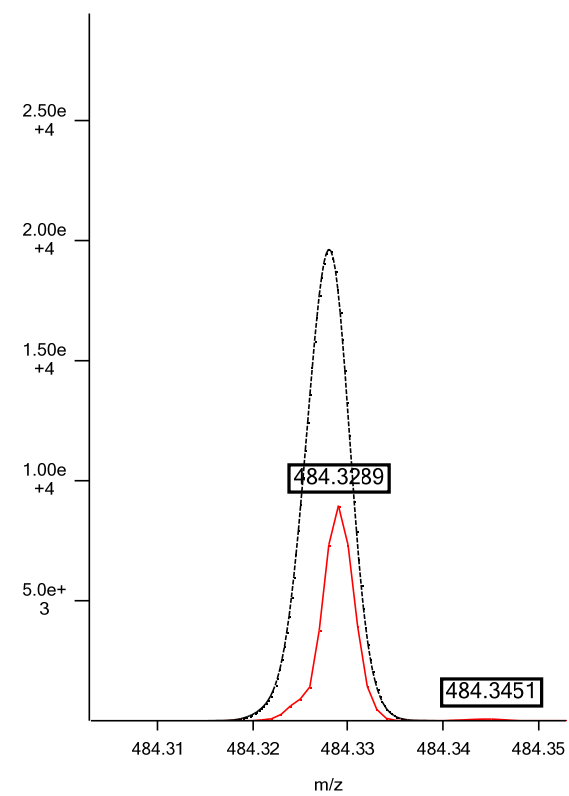

Positive ESI: LPE 18:1;  $C_{23}H_{47}NO_7P$ ; theoretical  $m/z$  480.3090,  $(M+H)^+$ ; isotopic fit 0.0076

### Isotope 1

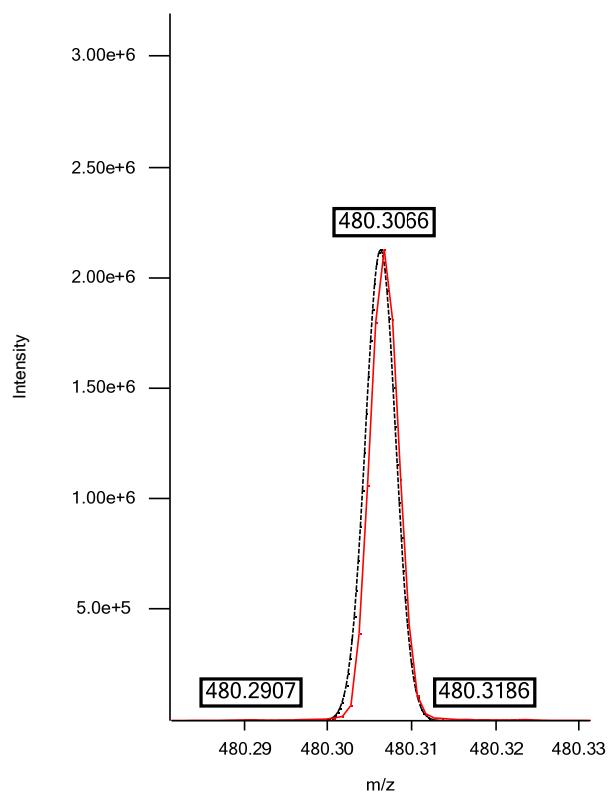

### Isotope 2

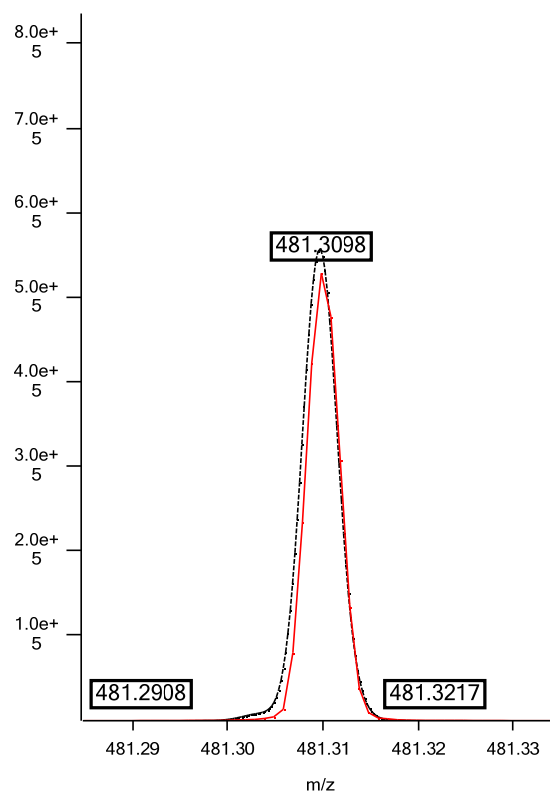

### Isotope 3

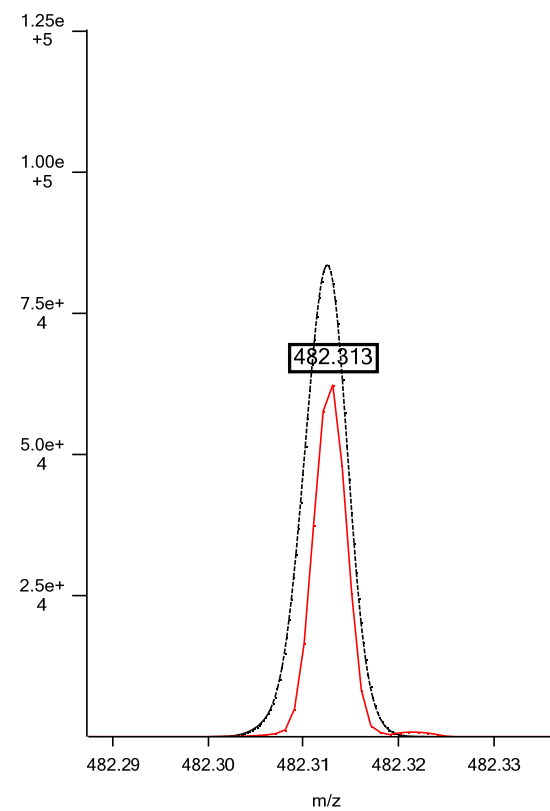

Positive ESI: LPE 18:2; C<sub>23</sub>H<sub>45</sub>NO<sub>7</sub>P; theoretical *m/z* 478.2934, (M+H)<sup>+</sup>; isotopic fit 0.0036

Isotope 1

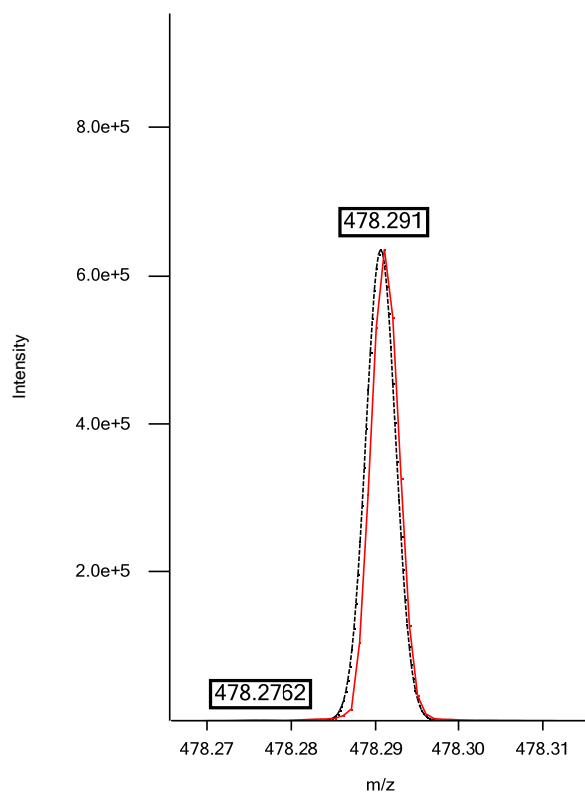

Isotope 2

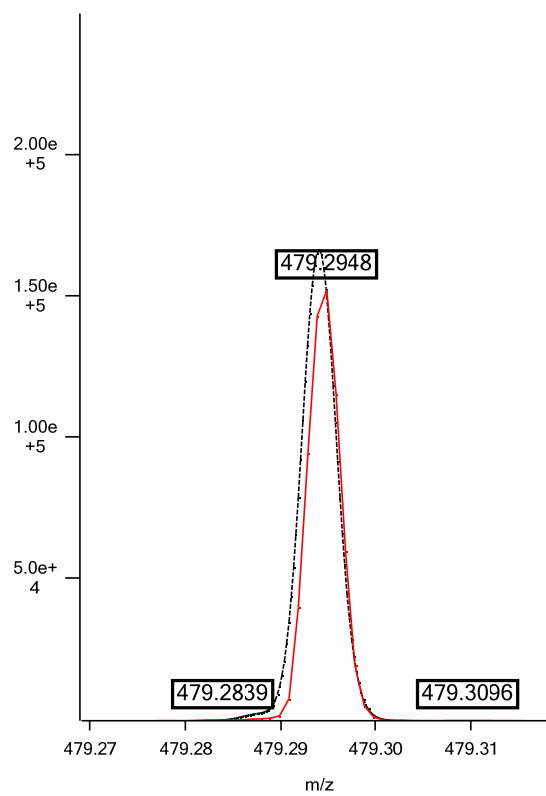

Isotope 3

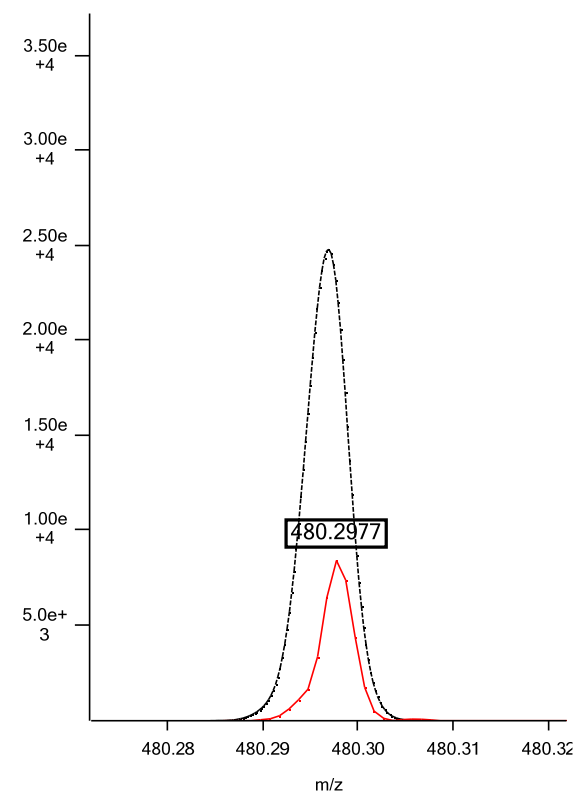



Positive ESI: LPE 20:3; C<sub>25</sub>H<sub>47</sub>NO<sub>7</sub>P; theoretical  $m/z$  504.3090, (M+H)<sup>+</sup>; isotopic fit 0.0125

### Isotope 1

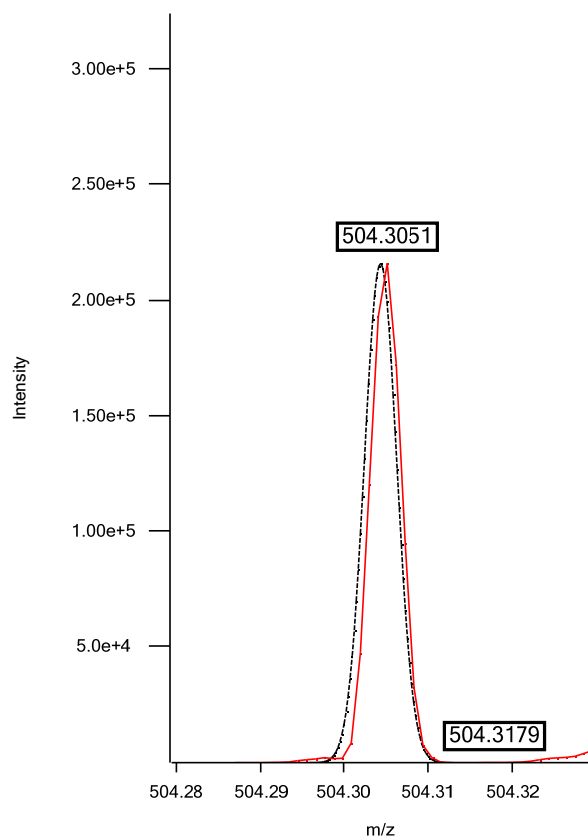

### Isotope 2

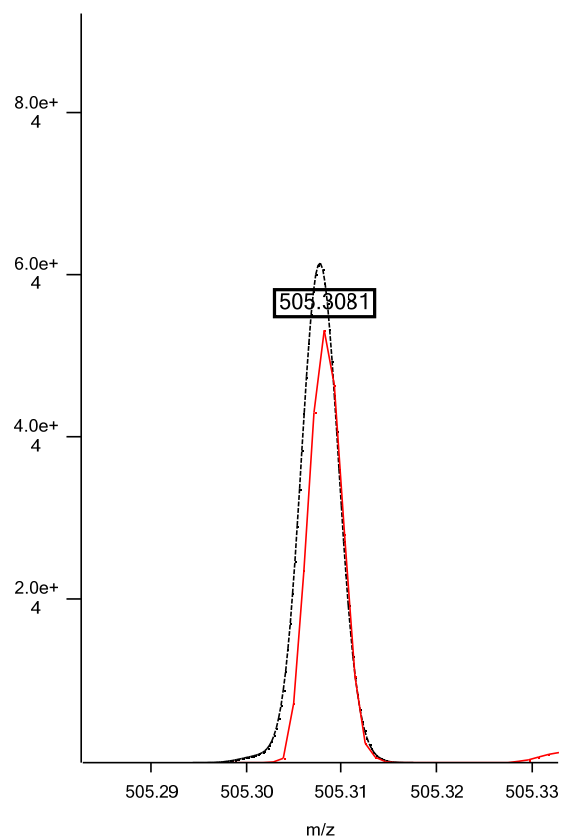

### Isotope 3

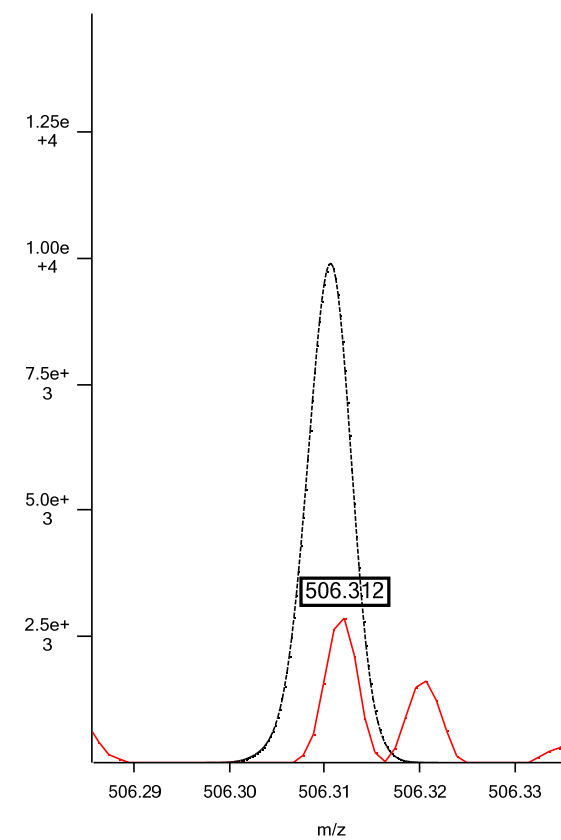

Positive ESI: LPE 20:4; C<sub>25</sub>H<sub>45</sub>NO<sub>7</sub>P; theoretical *m/z* 502.2934, (M+H)<sup>+</sup>; isotopic fit 0.0226

### Isotope 1

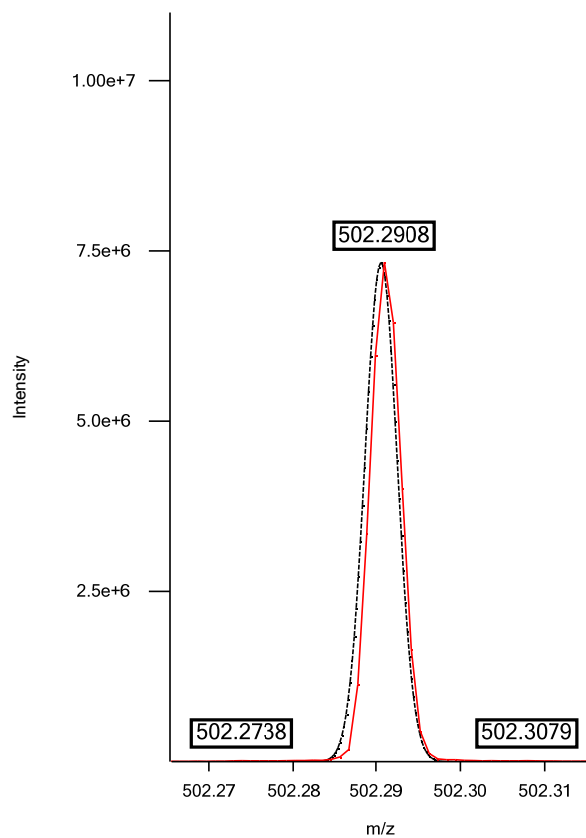

### Isotope 2

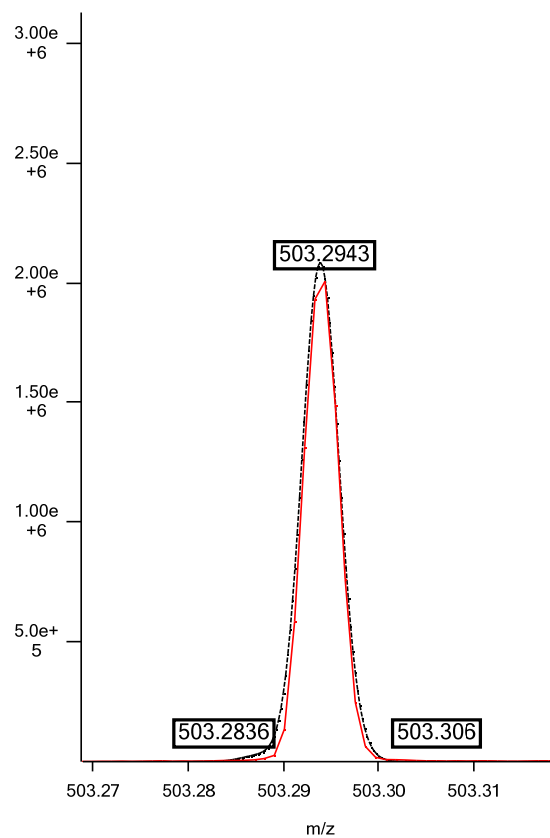

### Isotope 3

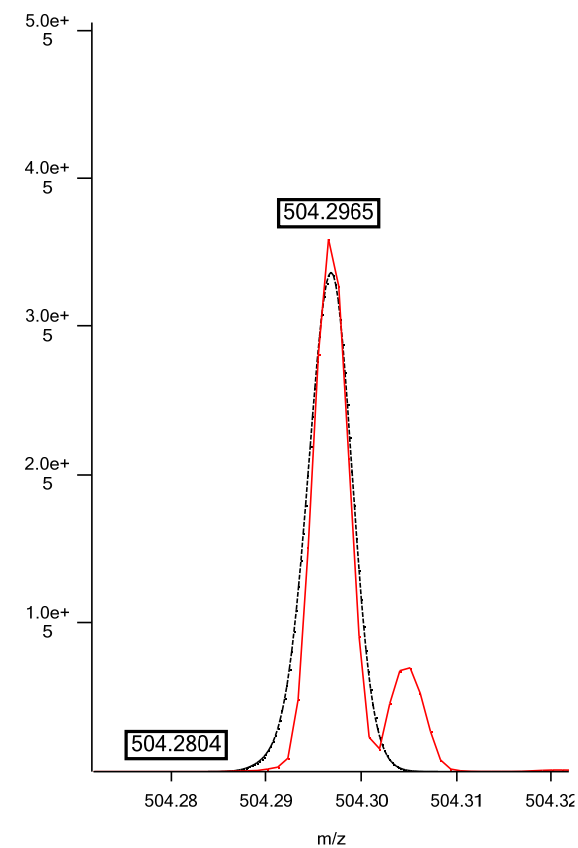

Positive ESI: LPE 20:5; C<sub>25</sub>H<sub>43</sub>NO<sub>7</sub>P; theoretical *m/z* 500.2777, (M+H)<sup>+</sup>; isotopic fit 0.0099

### Isotope 1

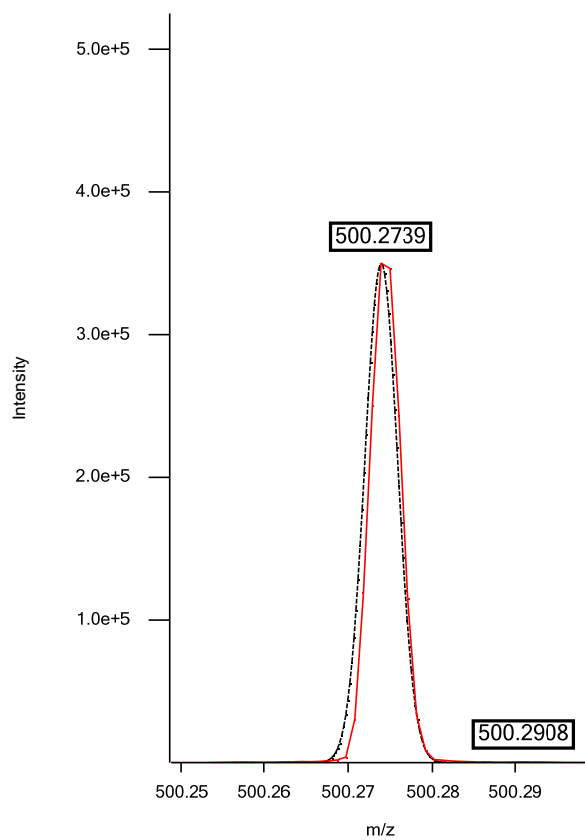

### Isotope 2

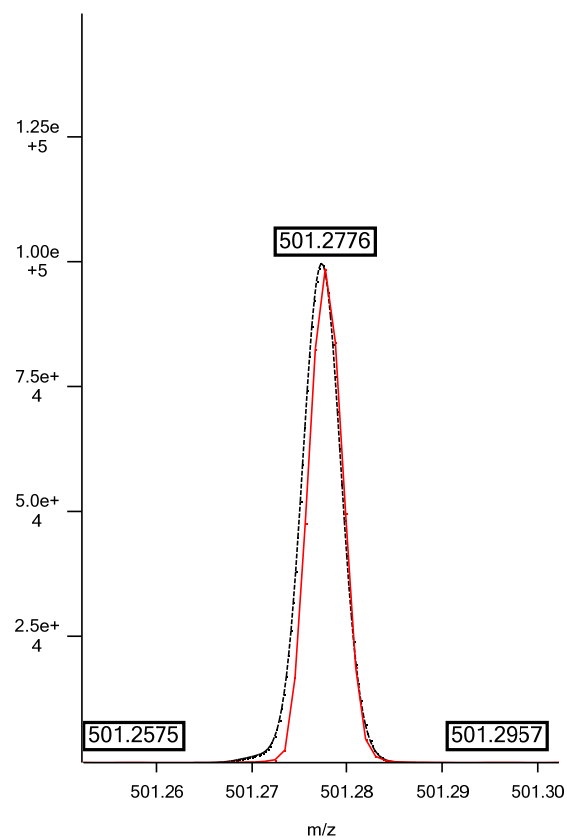

### Isotope 3

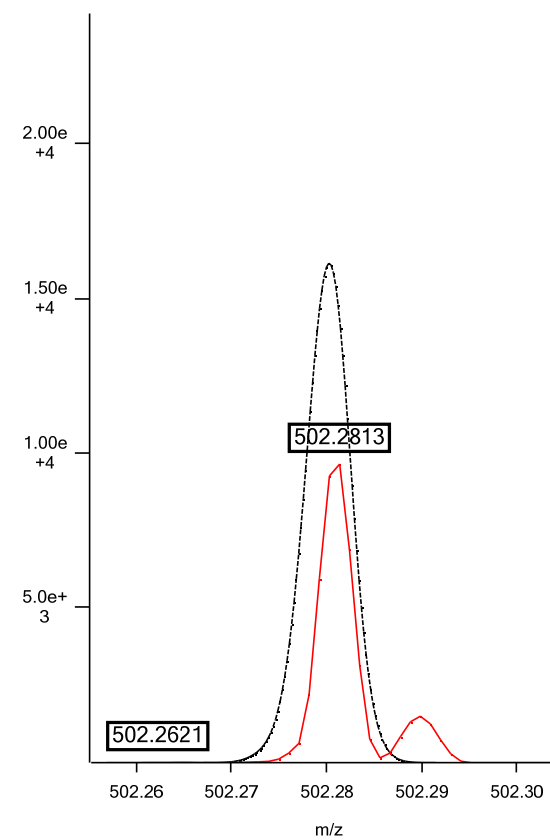

Positive ESI: LPE 22:2; C<sub>27</sub>H<sub>53</sub>NO<sub>7</sub>P; theoretical *m/z* 534.3560, (M+H)<sup>+</sup>; isotopic fit 0.0316

### Isotope 1

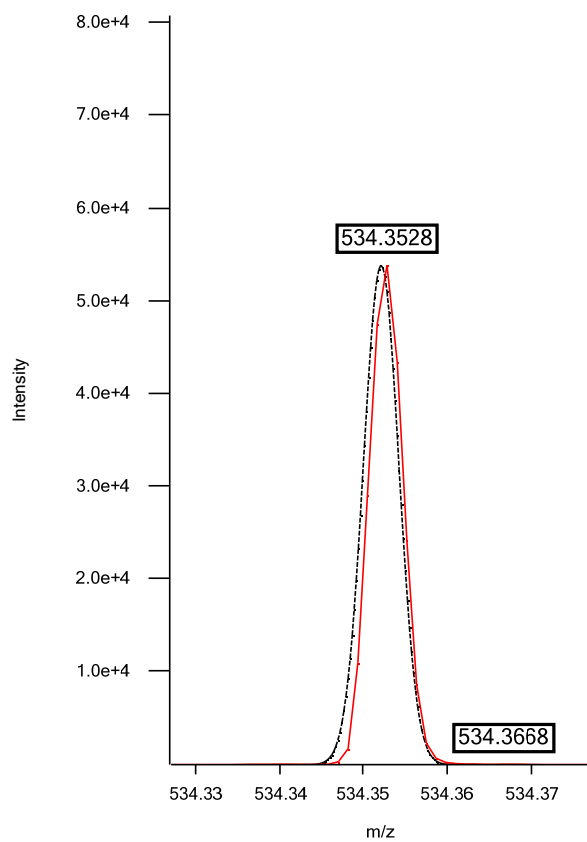

### Isotope 2

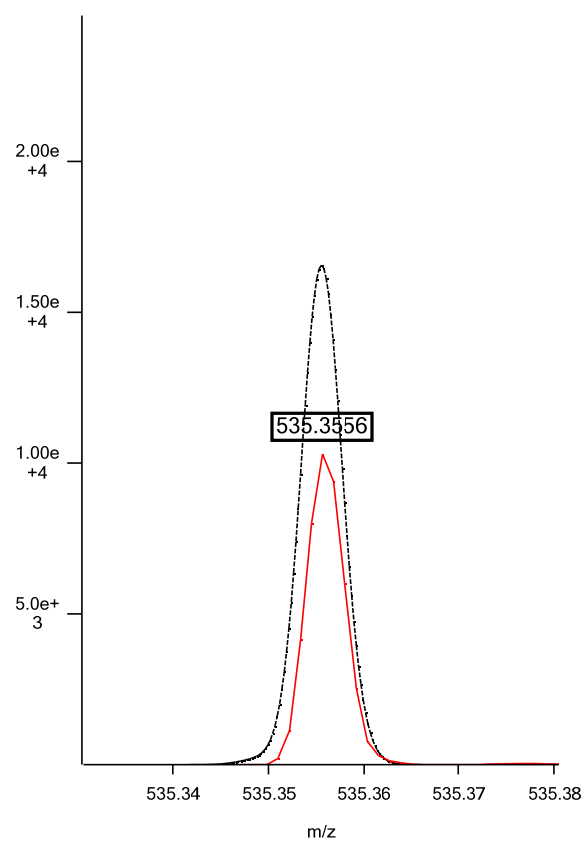

### Isotope 3

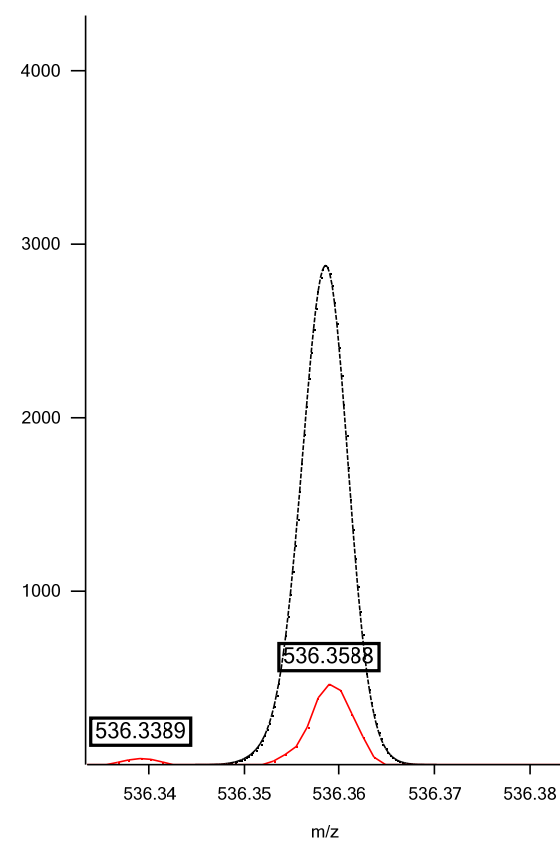

Positive ESI: LPE 22:3; C<sub>27</sub>H<sub>51</sub>NO<sub>7</sub>P; theoretical  $m/z$  532.3403, (M+H)<sup>+</sup>; isotopic fit 0.0111

### Isotope 1

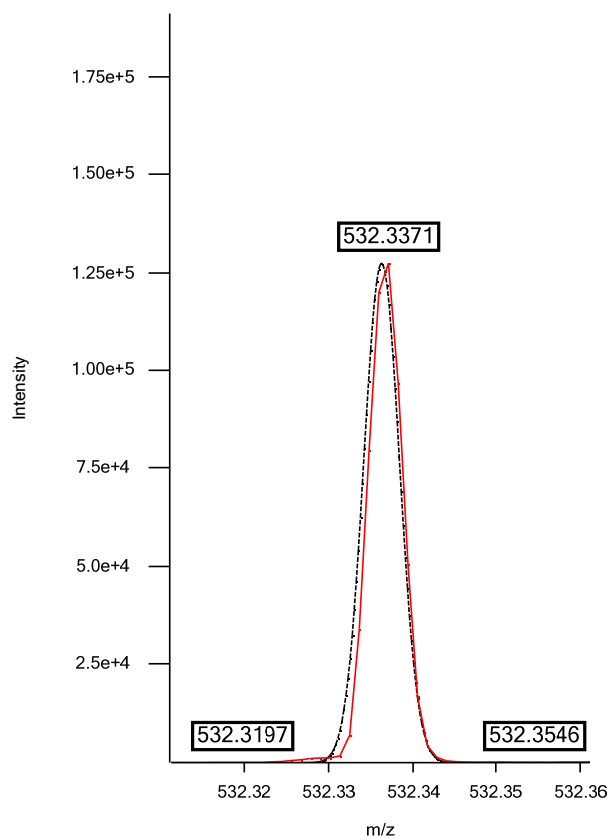

### Isotope 2

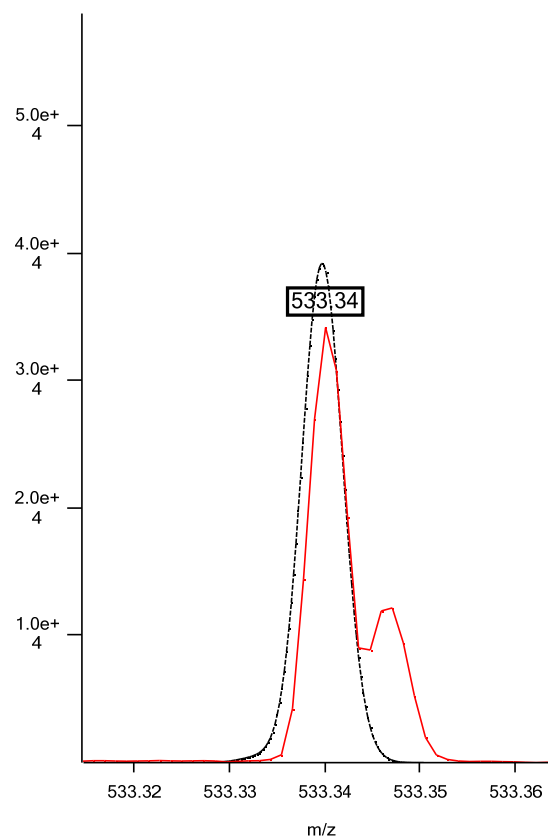

### Isotope 3

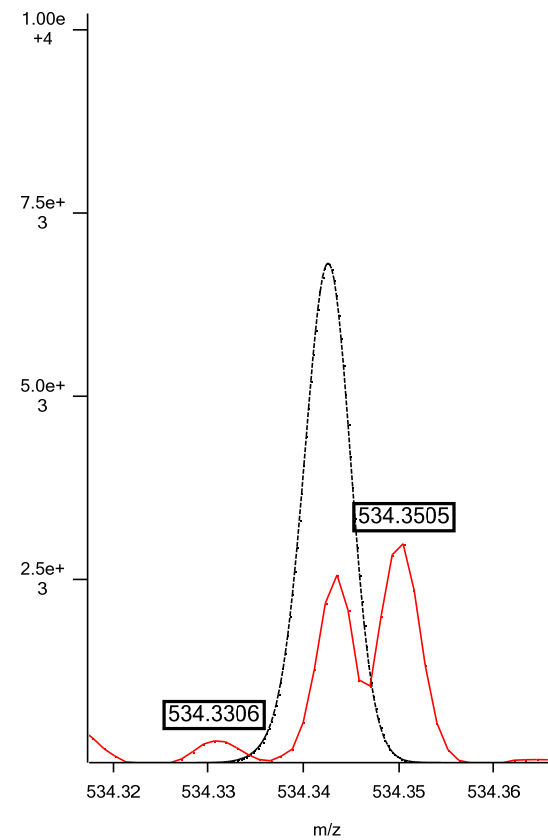

Positive ESI: LPE 22:4; C<sub>27</sub>H<sub>49</sub>NO<sub>7</sub>P; theoretical *m/z* 530.3247, (M+H)<sup>+</sup>; isotopic fit 0.0023

### Isotope 1

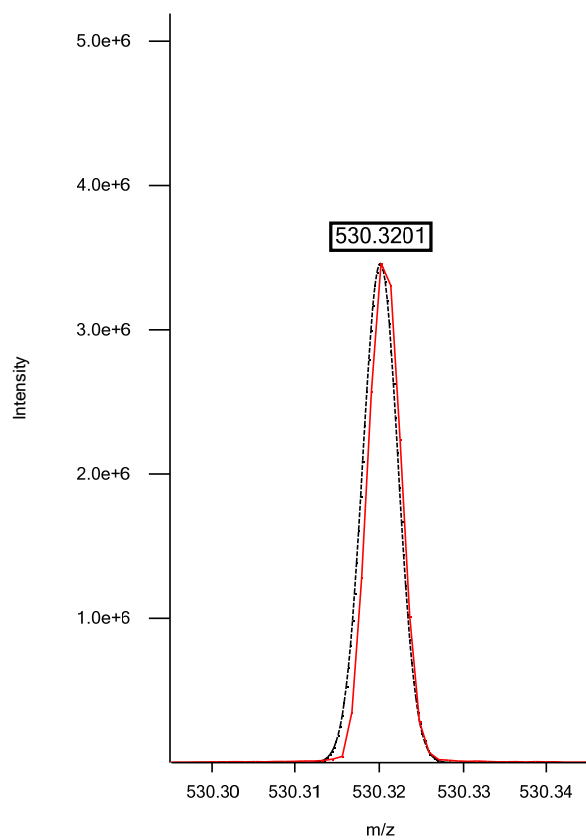

### Isotope 2

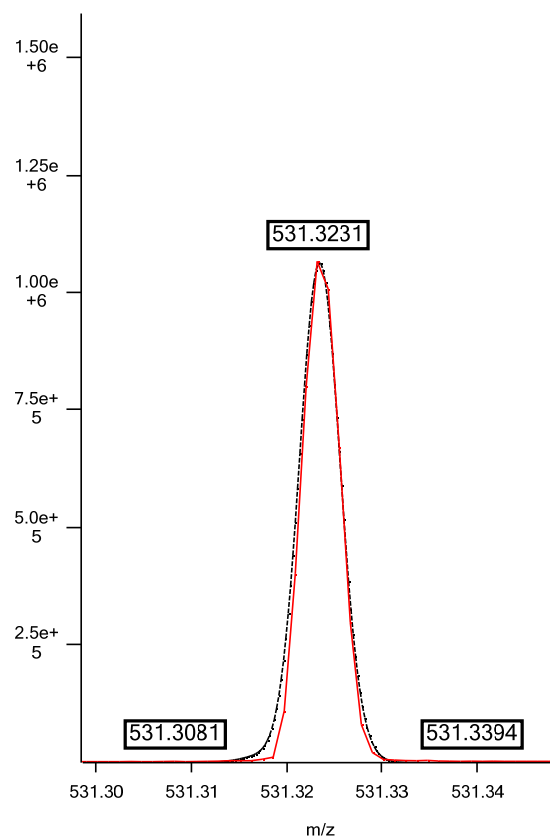

### Isotope 3

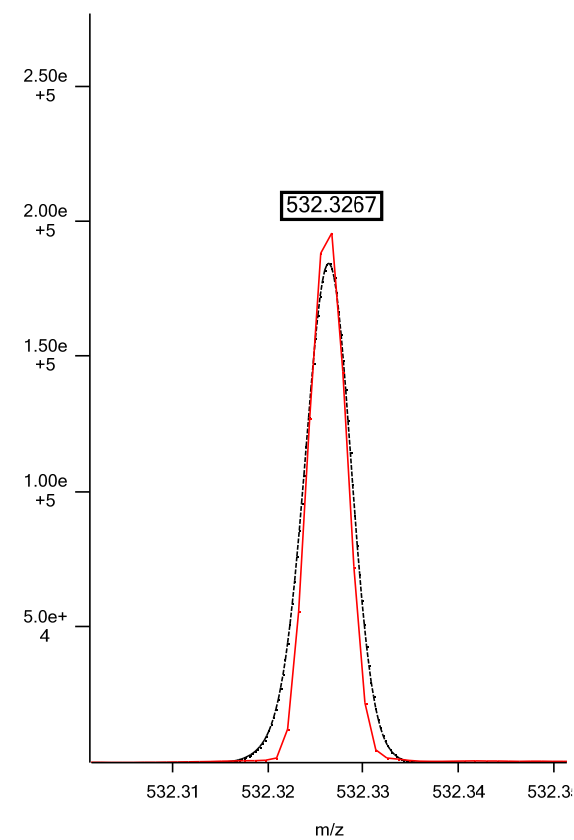

Positive ESI: LPE 22:5; C<sub>27</sub>H<sub>47</sub>NO<sub>7</sub>P; theoretical *m/z* 528.3090, (M+H)<sup>+</sup>; isotopic fit 0.0013

### Isotope 1

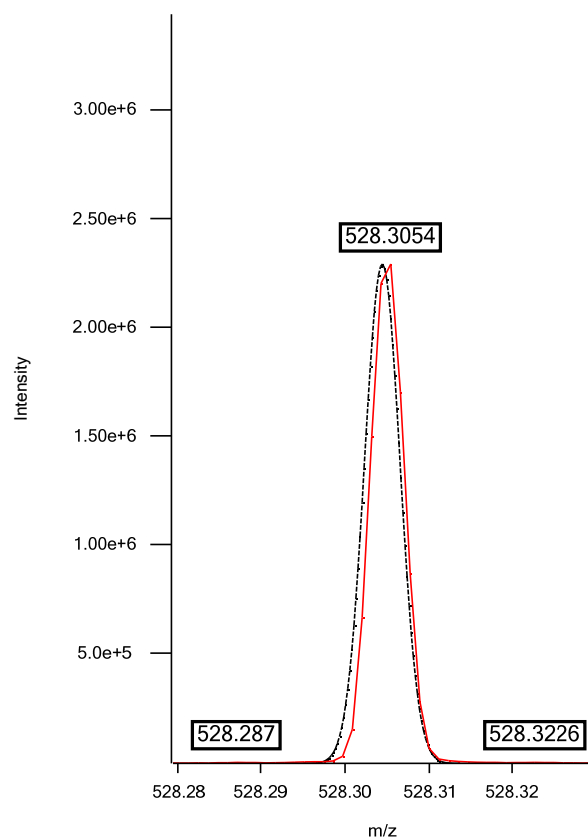

### Isotope 2

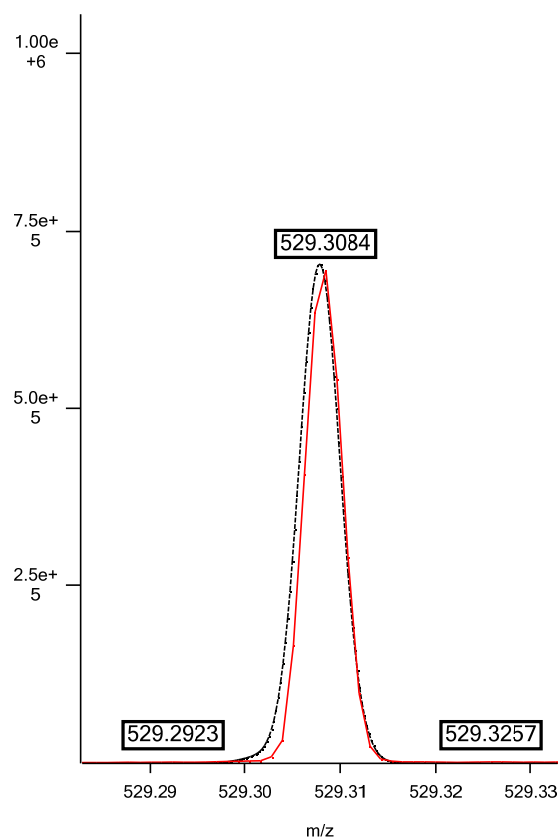

### Isotope 3

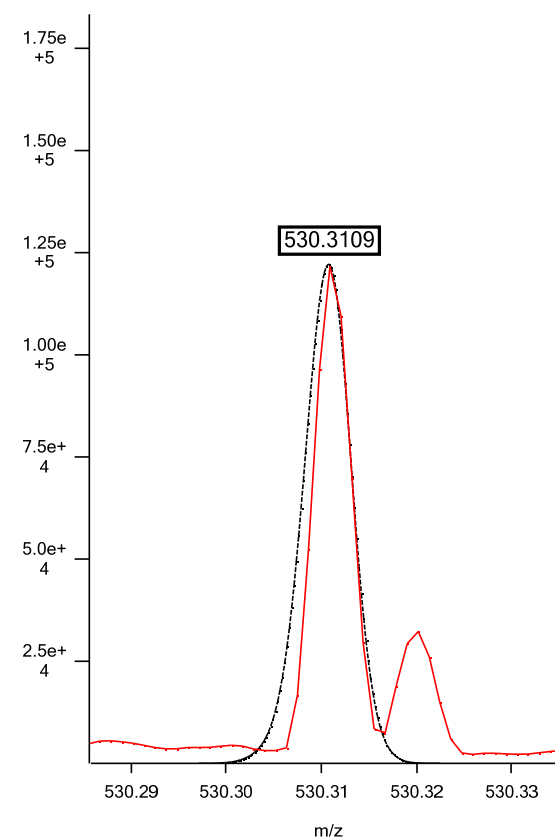

Positive ESI: LPE 22:6; C<sub>27</sub>H<sub>45</sub>NO<sub>7</sub>P; theoretical *m/z* 526.2934, (M+H)<sup>+</sup>; isotopic fit 0.0032

### Isotope 1

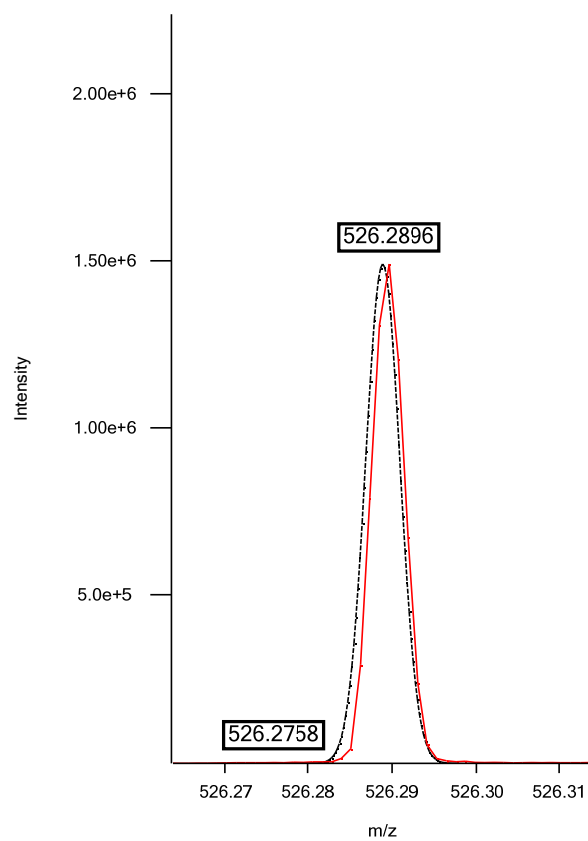

### Isotope 2

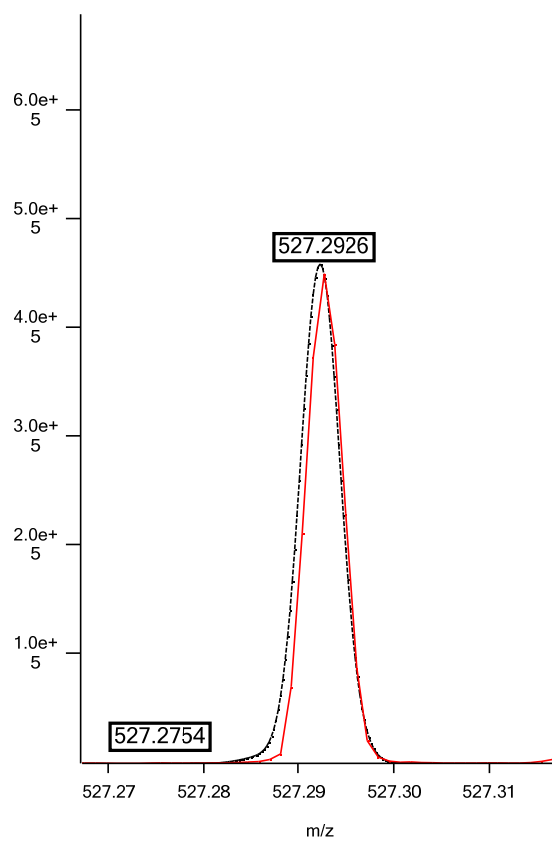

### Isotope 3

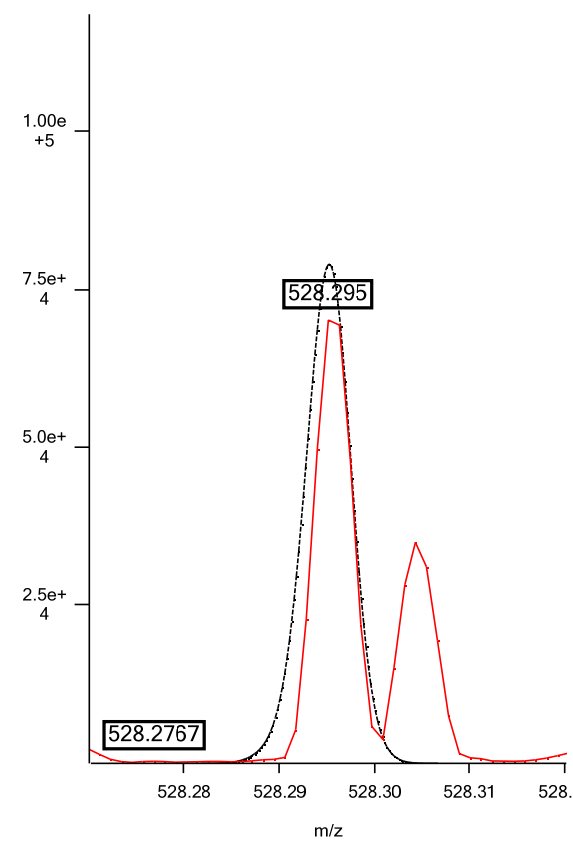



Negative ESI: Oxidized PE 18:0/Dihydroxy-5:0 or 18:0/Hydroperoxy-5:0;  $C_{28}H_{55}NO_{10}P$ ; theoretical  $m/z$  596.3563, (M-H)<sup>-</sup>; isotopic fit 0.0036

### Isotope 1

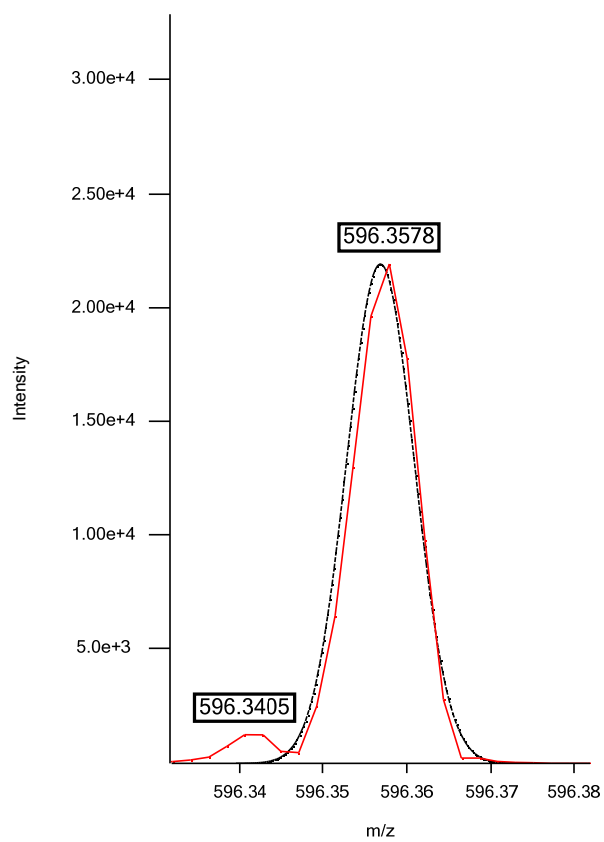

### Isotope 2

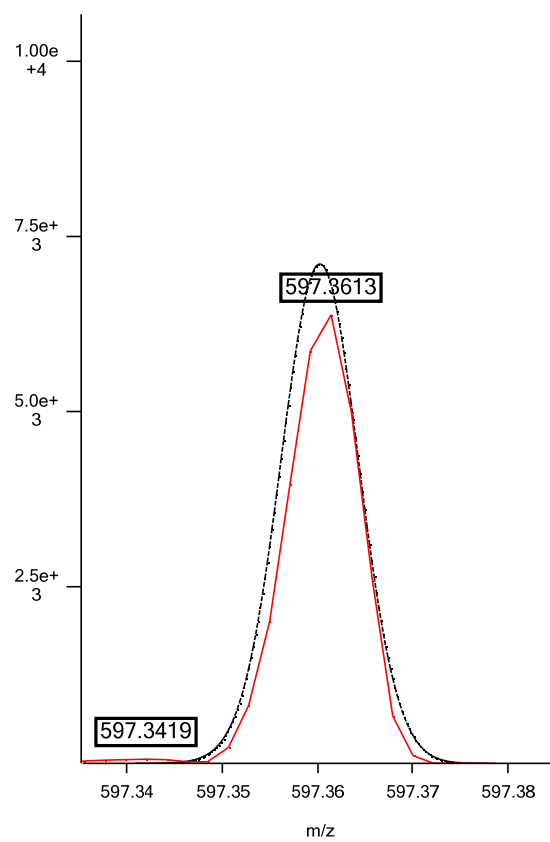

### Isotope 3

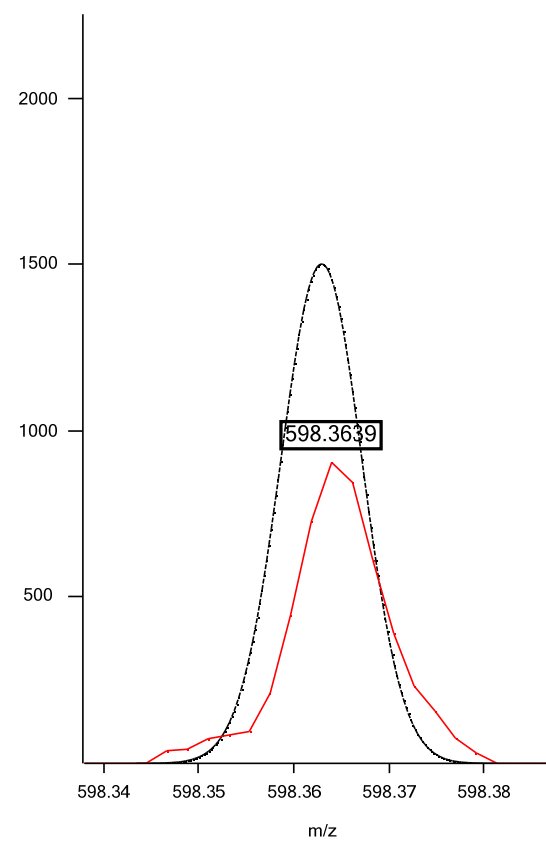

Negative ESI: Oxidized PE 18:0/Dihydroxy-6:0;  $C_{29}H_{57}NO_{10}P$ ; theoretical  $m/z$  610.3720, (M-H)<sup>-</sup>; isotopic fit 0.0048

### Isotope 1

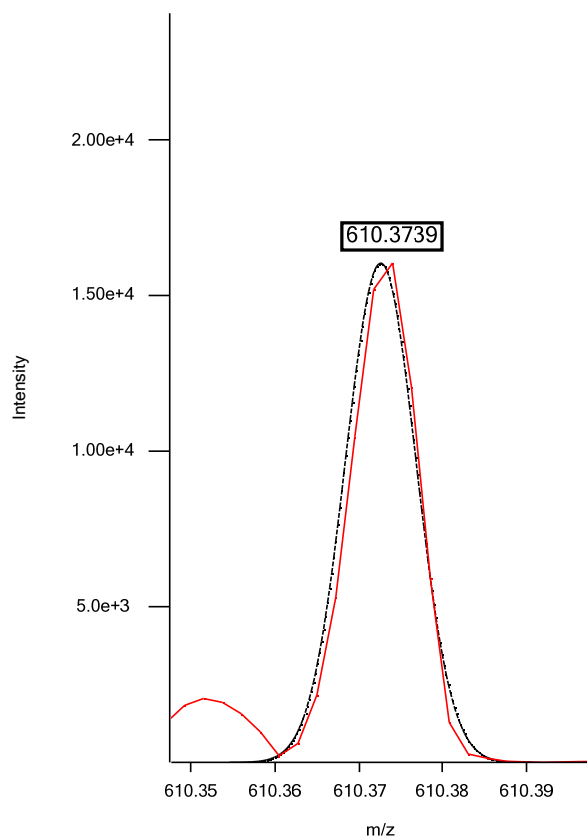

### Isotope 2

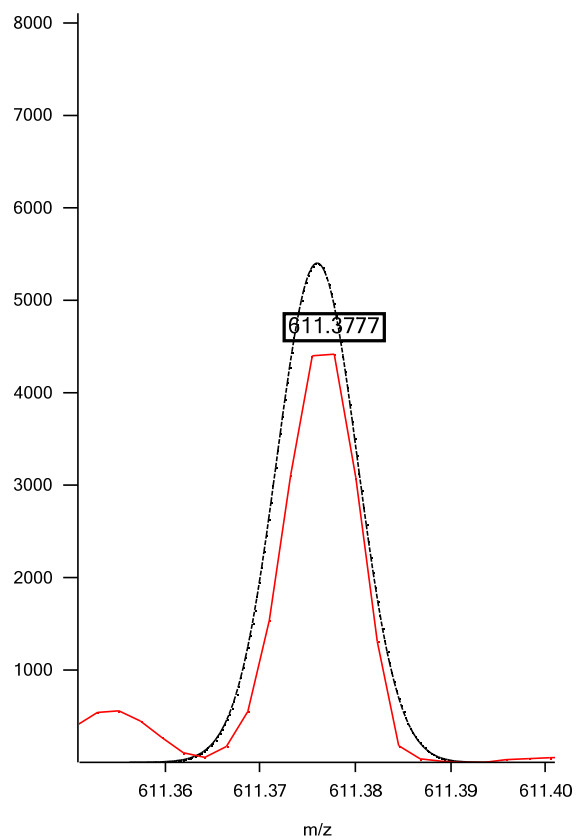

### Isotope 3

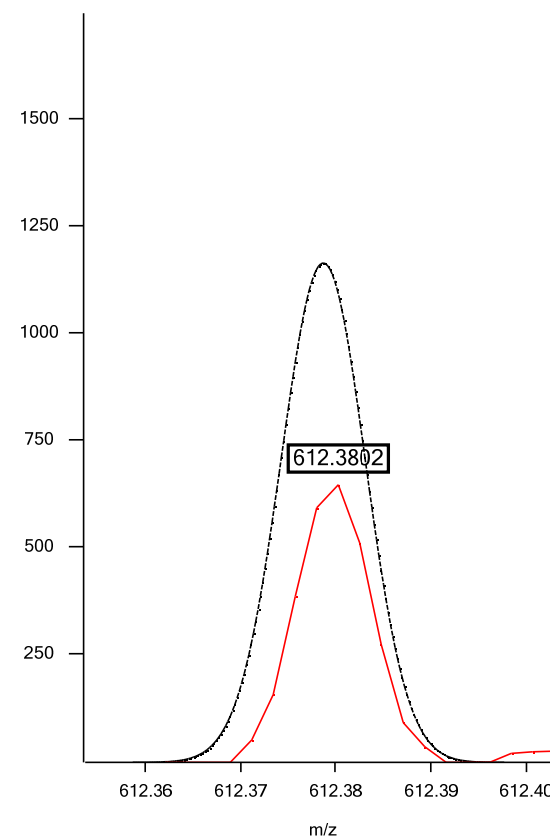

Negative ESI: Oxidized PE 16:0/ Tetrahydroxy-17:1;  $C_{38}H_{75}NO_{12}P$ ; theoretical  $m/z$  768.5027, (M-H)<sup>-</sup>; isotopic fit 0.0057

### Isotope 1

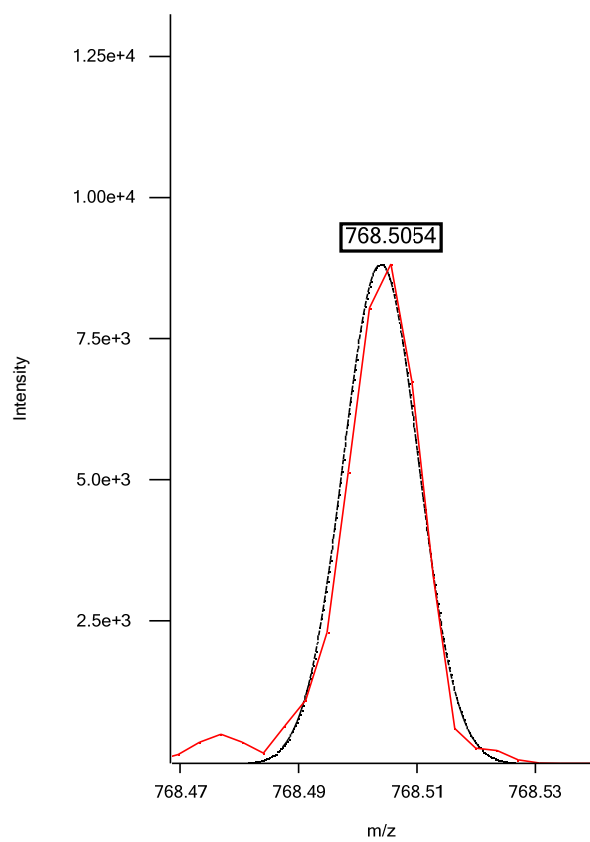

### Isotope 2

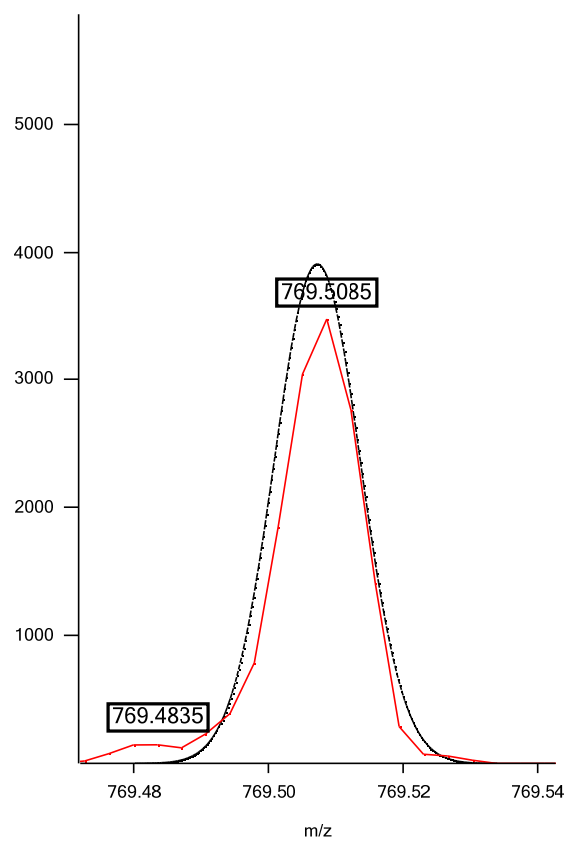

### Isotope 3

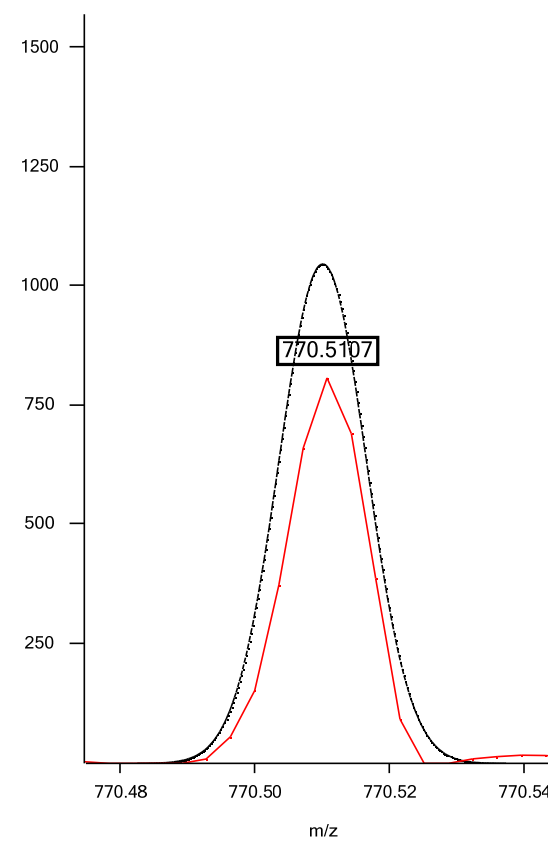

Positive ESI: PE 34:4; C<sub>39</sub>H<sub>71</sub>NO<sub>8</sub>P; theoretical  $m/z$  712.4917, (M+H)<sup>+</sup>; isotopic fit 0.0132

### Isotope 1

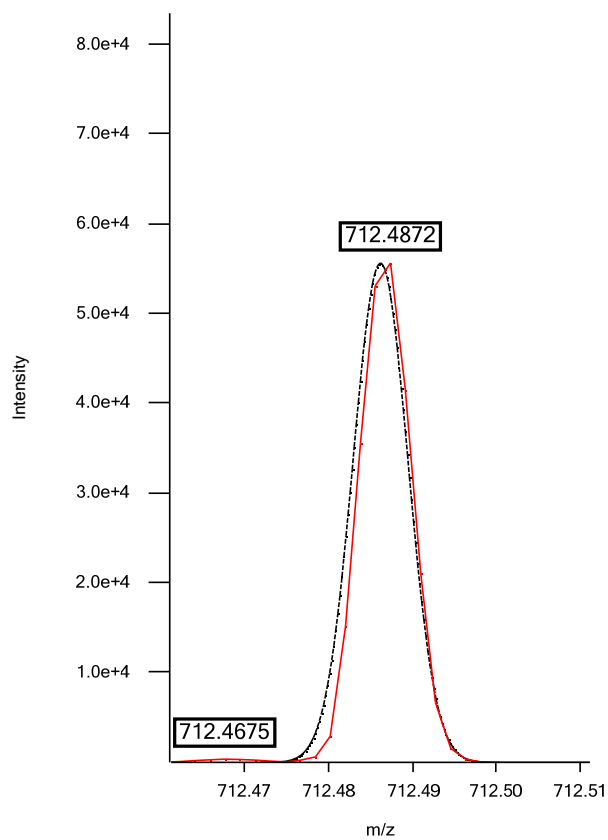

### Isotope 2

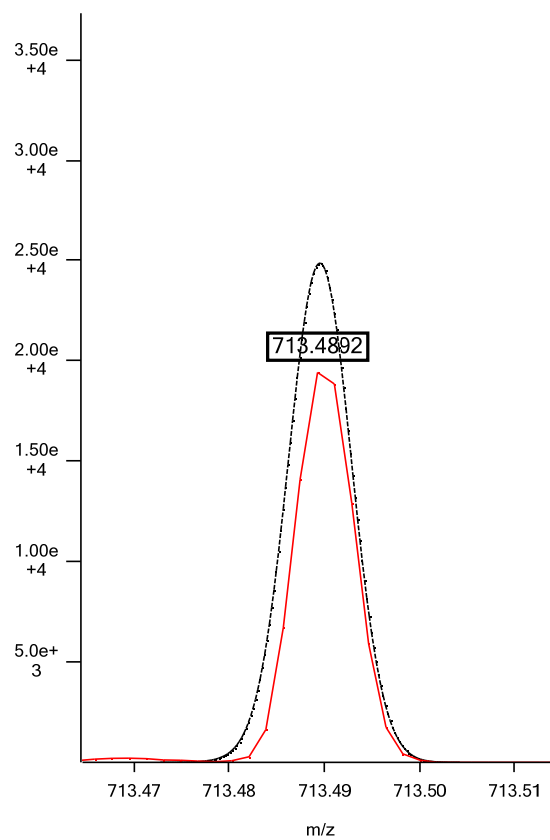

### Isotope 3

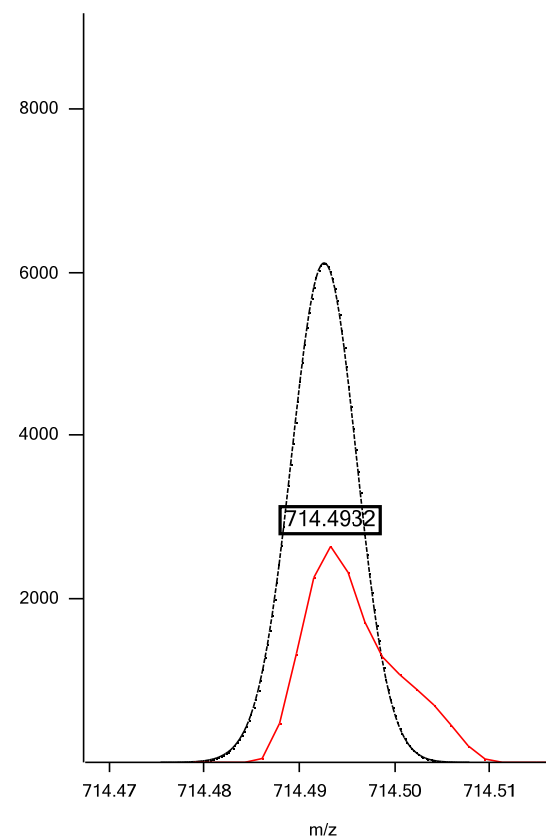

Positive ESI: PE 34:3; C<sub>39</sub>H<sub>73</sub>NO<sub>8</sub>P; theoretical  $m/z$  714.5074, (M+H)<sup>+</sup>; isotopic fit 0.0110

### Isotope 1

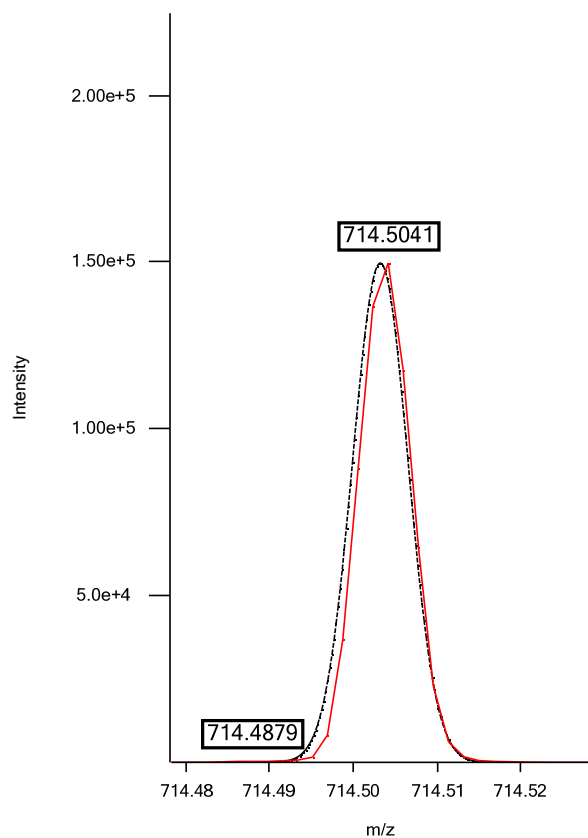

### Isotope 2

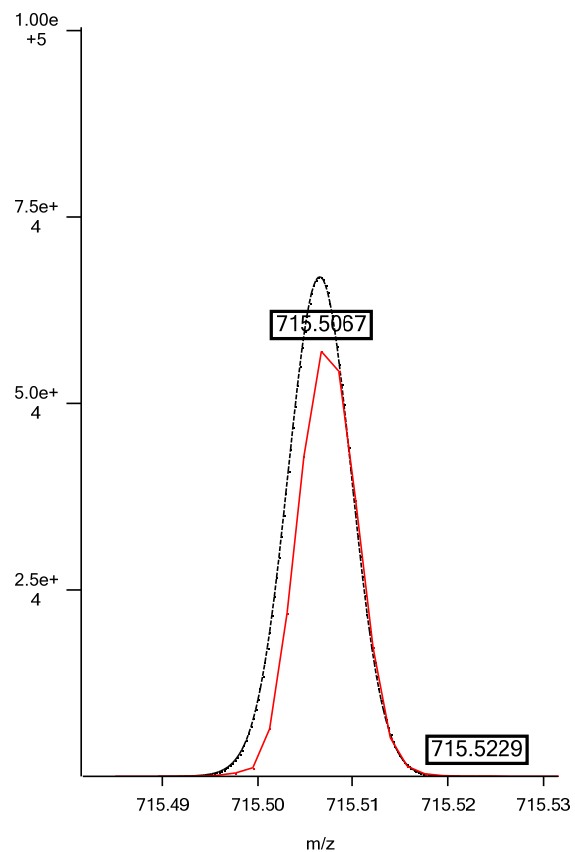

### Isotope 3

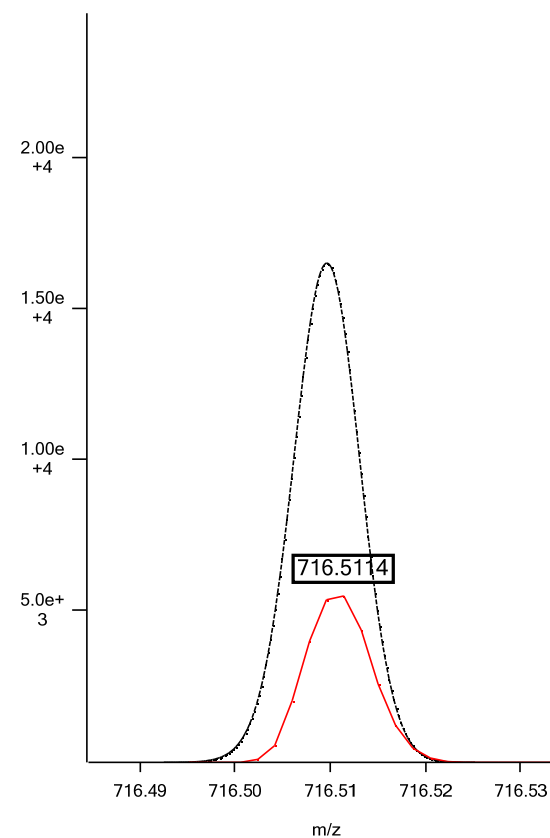

Negative ESI: PE 18:0p/16:1 or 16:0p/18:1;  $C_{39}H_{75}NO_7P$ ; theoretical  $m/z$  700.5281, (M-H)<sup>-</sup>; isotopic fit 0.0056

### Isotope 1

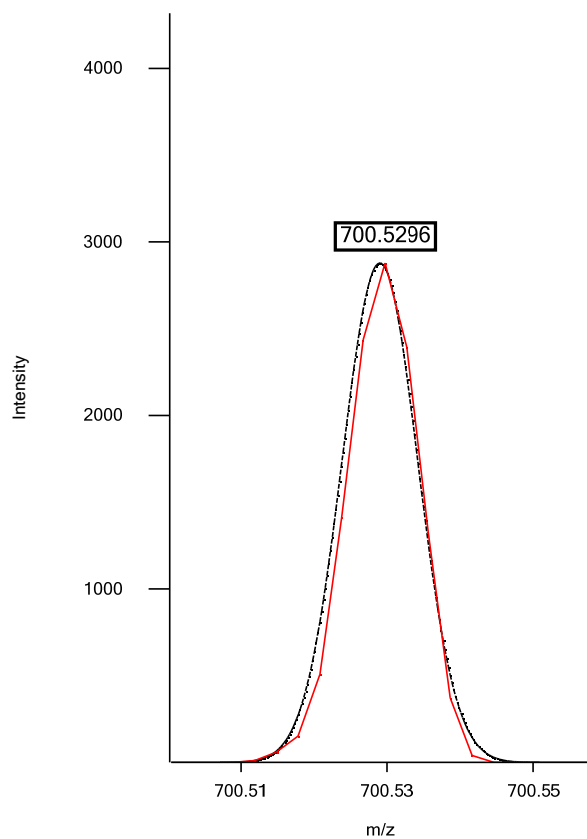

### Isotope 2

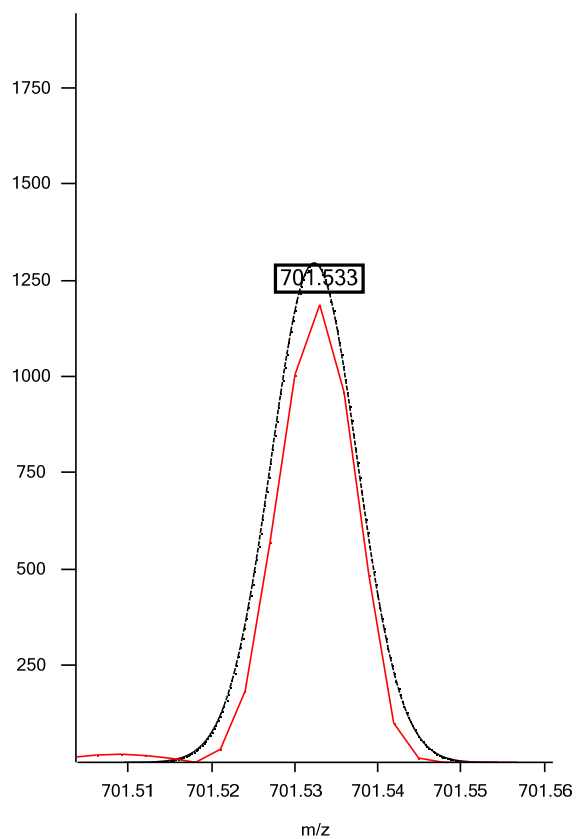

### Isotope 3

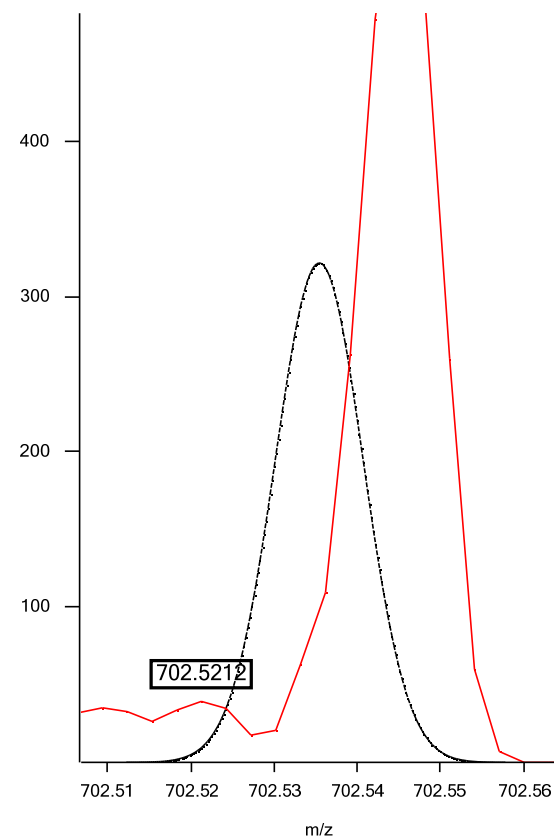

Positive ESI: PE 34:2; C<sub>39</sub>H<sub>75</sub>NO<sub>8</sub>P; theoretical  $m/z$  716.5230, (M+H)<sup>+</sup>; isotopic fit 0.0062

### Isotope 1

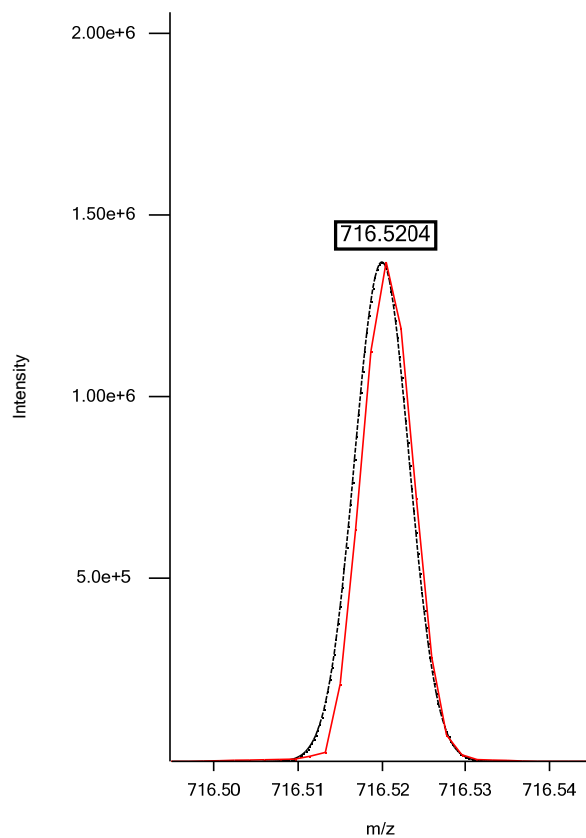

### Isotope 2

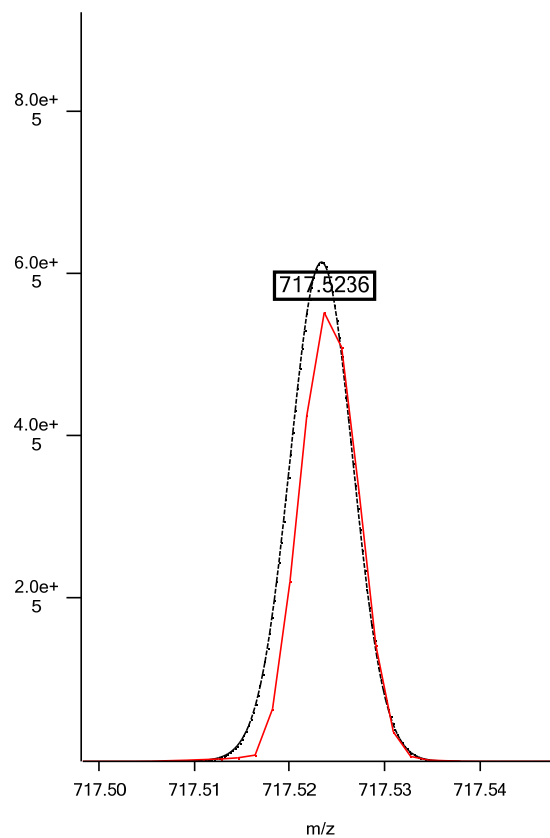

### Isotope 3

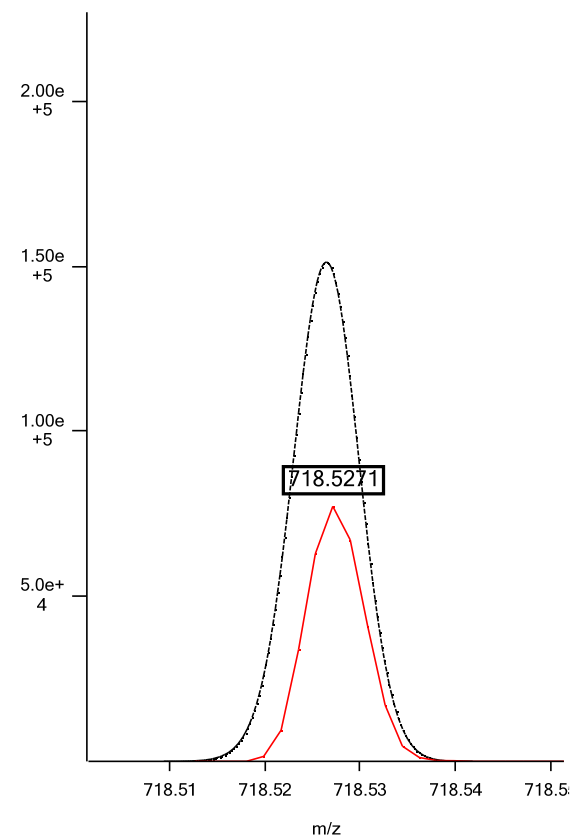

Positive ESI: PE 34:1; C<sub>39</sub>H<sub>77</sub>NO<sub>8</sub>P; theoretical  $m/z$  718.5387, (M+H)<sup>+</sup>; isotopic fit 0.0033

### Isotope 1

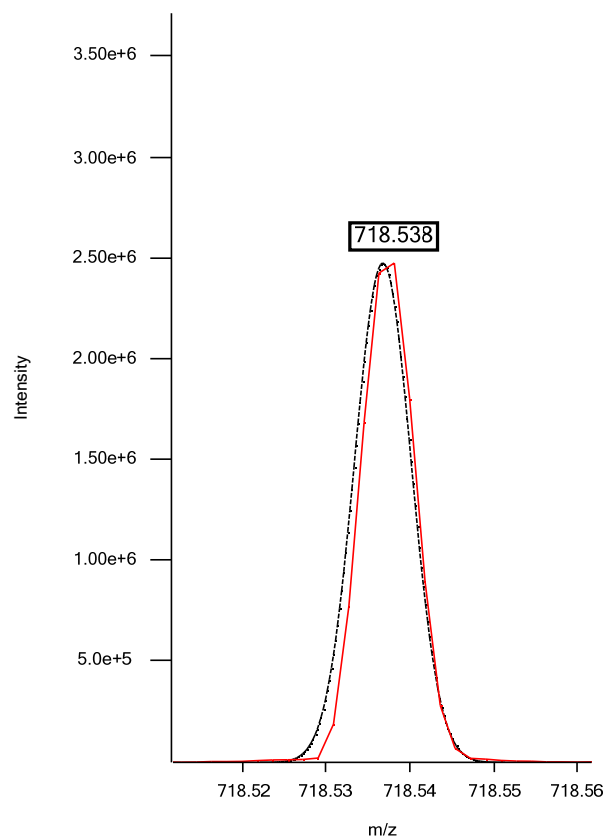

### Isotope 2

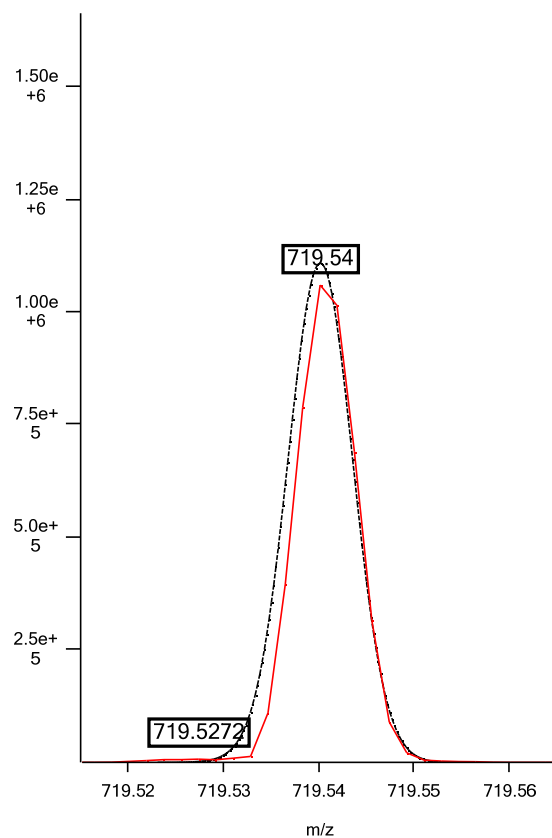

### Isotope 3

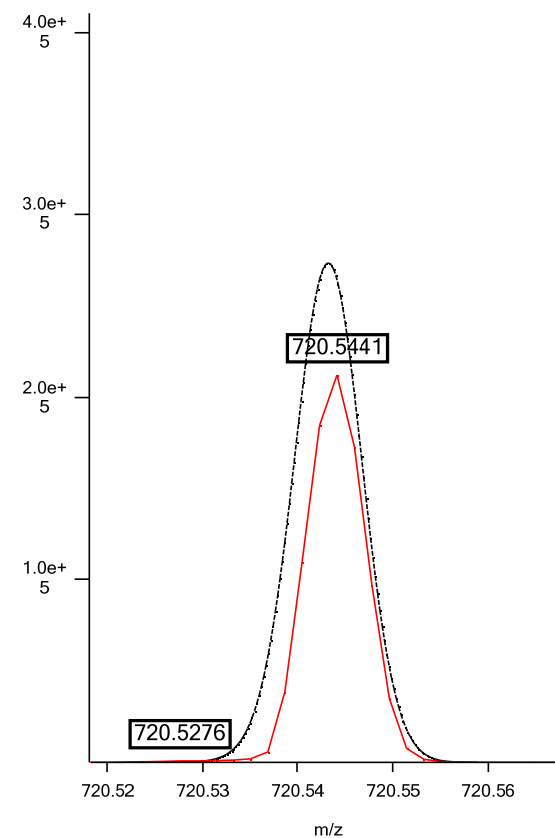



Negative ESI: Oxidized PE 16:0/Hydroperoxy-19:0; C<sub>40</sub>H<sub>81</sub>NO<sub>9</sub>P; theoretical *m/z* 750.5649, (M-H)<sup>-</sup>; isotopic fit 0.0059

### Isotope 1

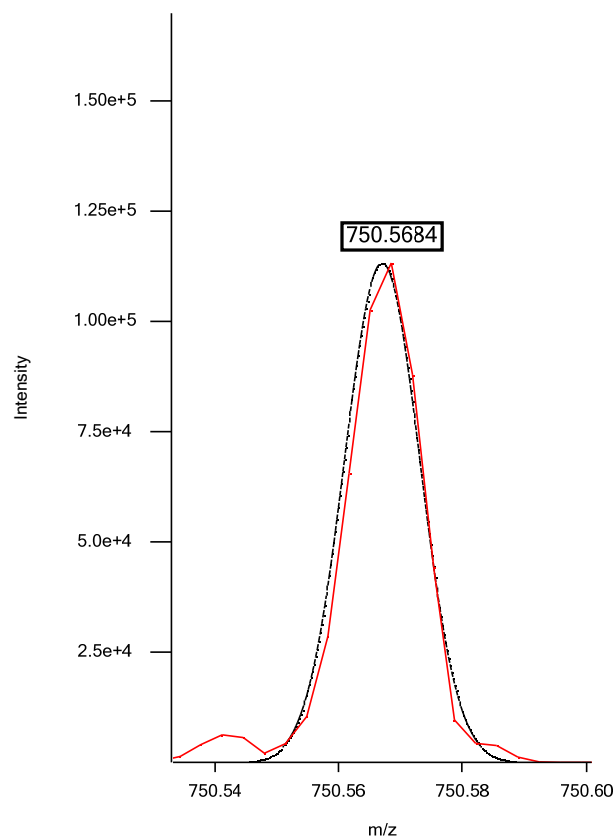

### Isotope 2

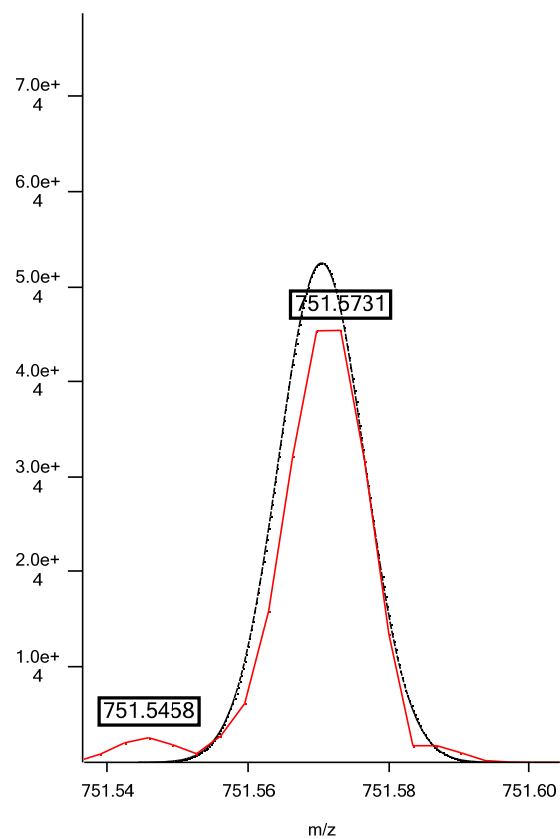

### Isotope 3

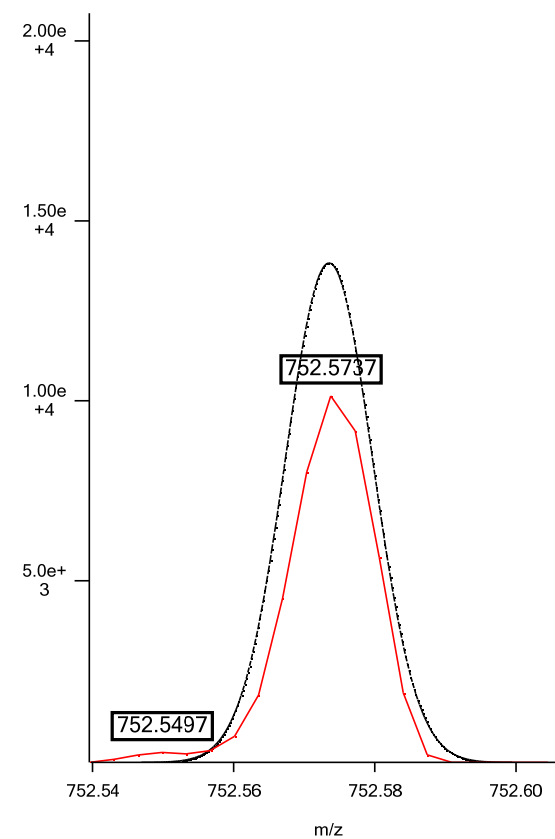

Positive ESI: PE 36:5; C<sub>41</sub>H<sub>73</sub>NO<sub>8</sub>P; theoretical  $m/z$  738.5074, (M+H)<sup>+</sup>; isotopic fit 0.0027

### Isotope 1

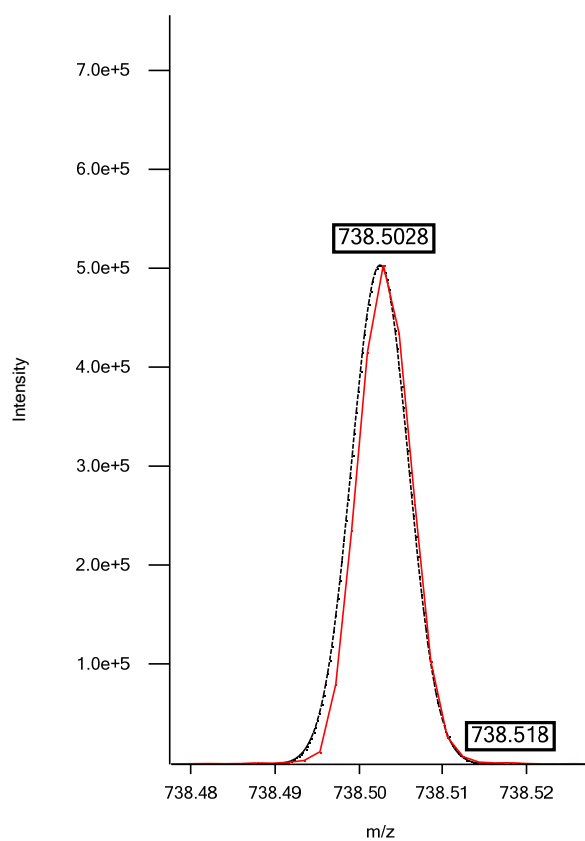

### Isotope 2

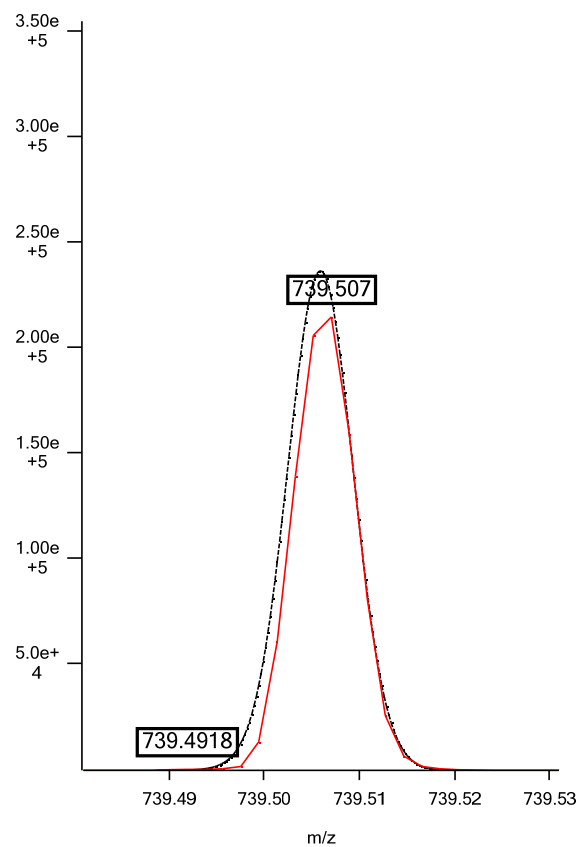

### Isotope 3

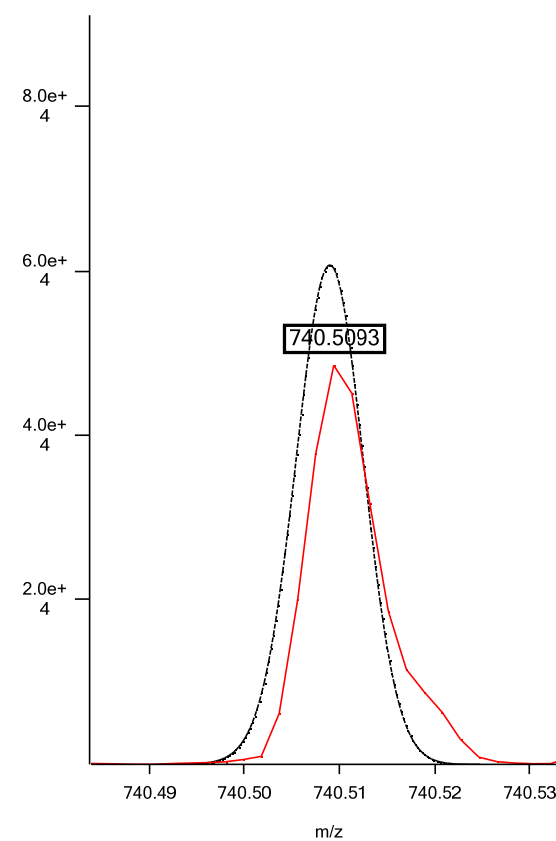

Positive ESI: PE 36:4; C<sub>41</sub>H<sub>75</sub>NO<sub>8</sub>P; theoretical *m/z* 740.5230, (M+H)<sup>+</sup>; isotopic fit 0.0033

### Isotope 1

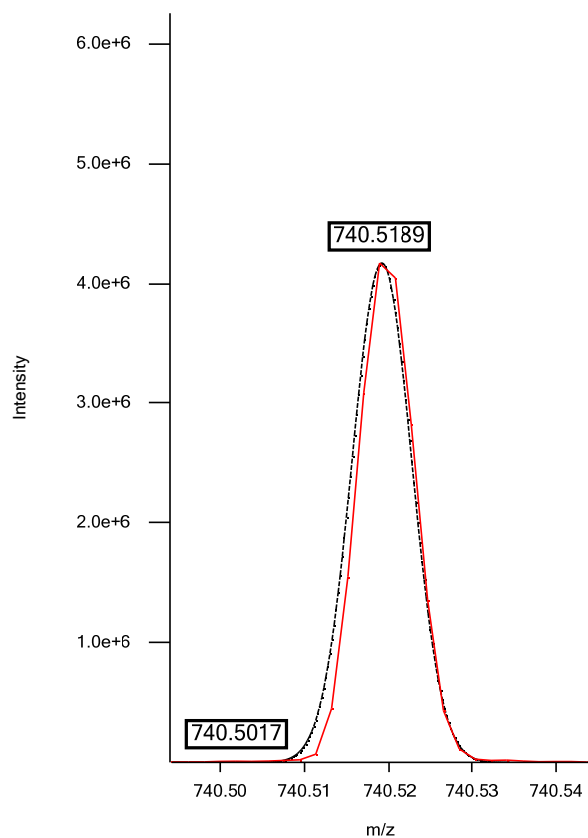

### Isotope 2

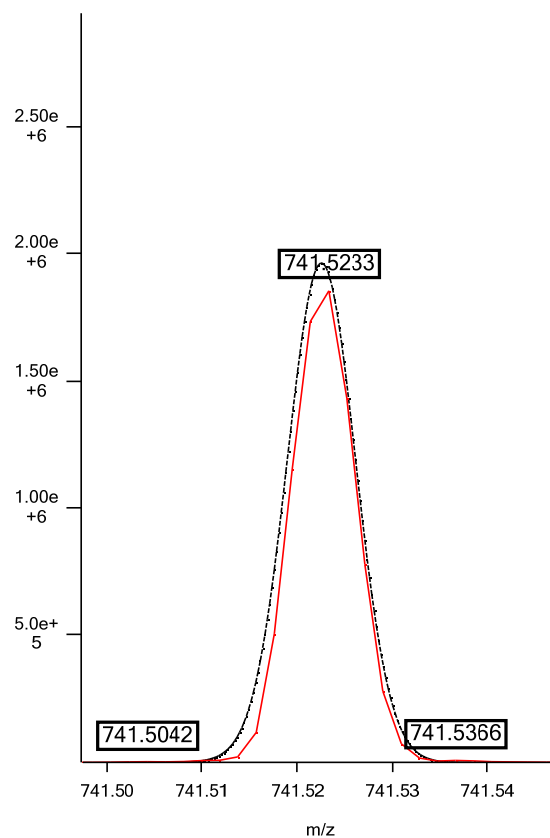

### Isotope 3

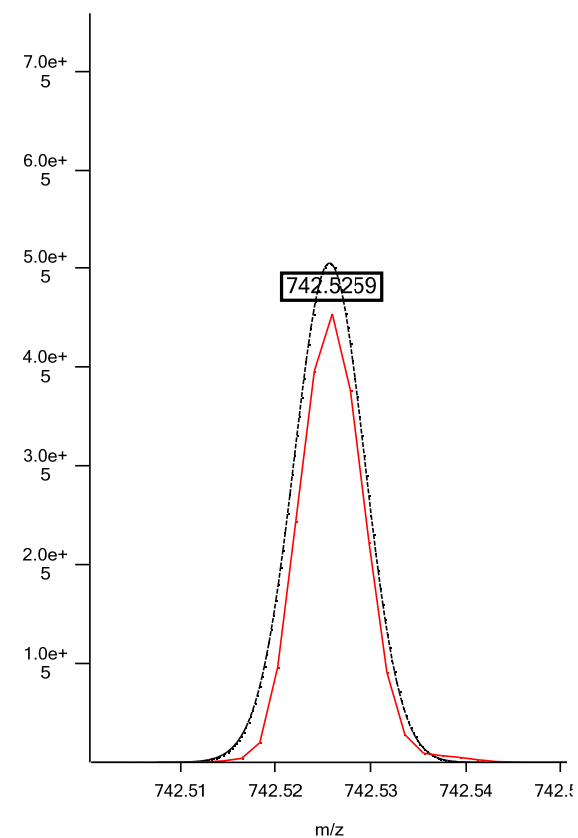

Positive ESI: PE 36:3; C<sub>41</sub>H<sub>77</sub>NO<sub>8</sub>P; theoretical *m/z* 742.5387, (M+H)<sup>+</sup>; isotopic fit 0.0072

### Isotope 1

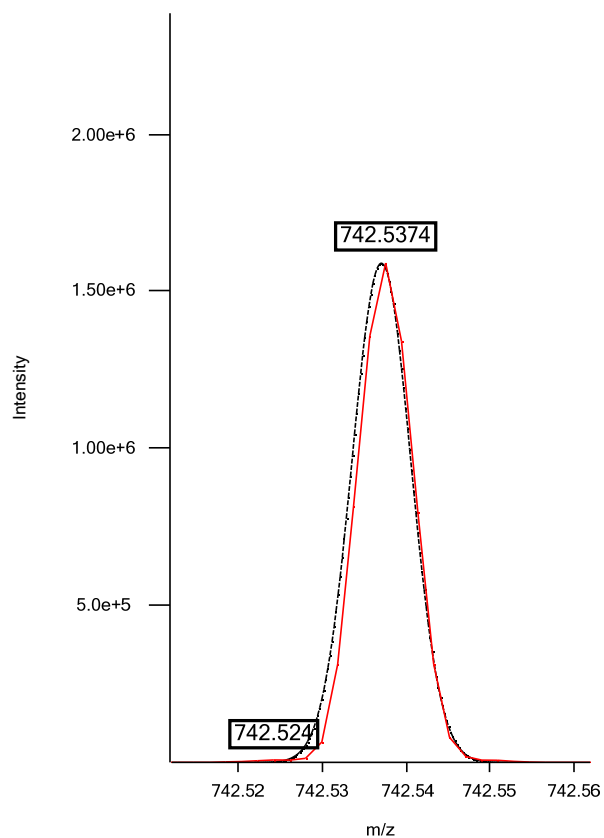

### Isotope 2

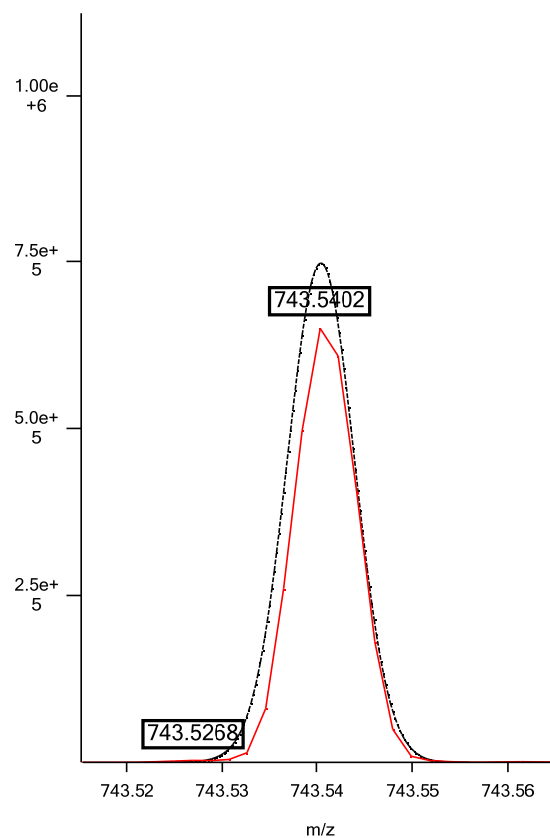

### Isotope 3

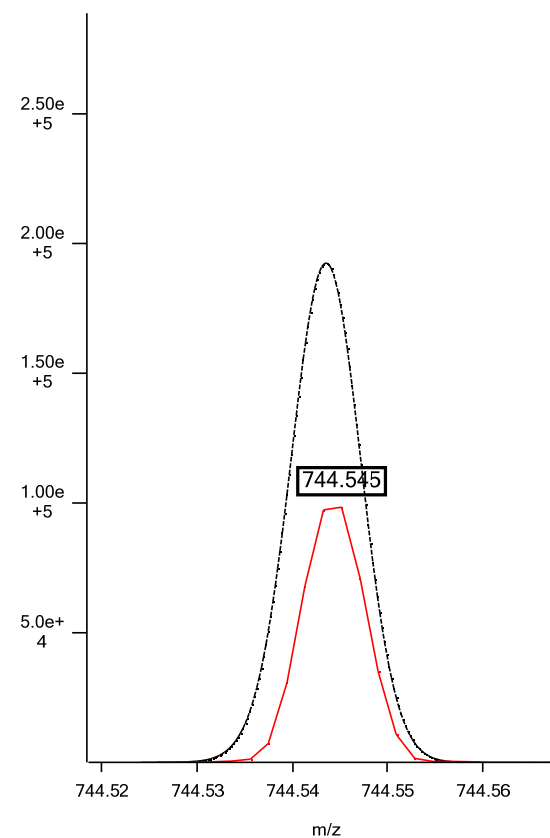

Positive ESI: PE 36:2; C<sub>41</sub>H<sub>79</sub>NO<sub>8</sub>P; theoretical  $m/z$  744.5543, (M+H)<sup>+</sup>; isotopic fit 0.0096

### Isotope 1

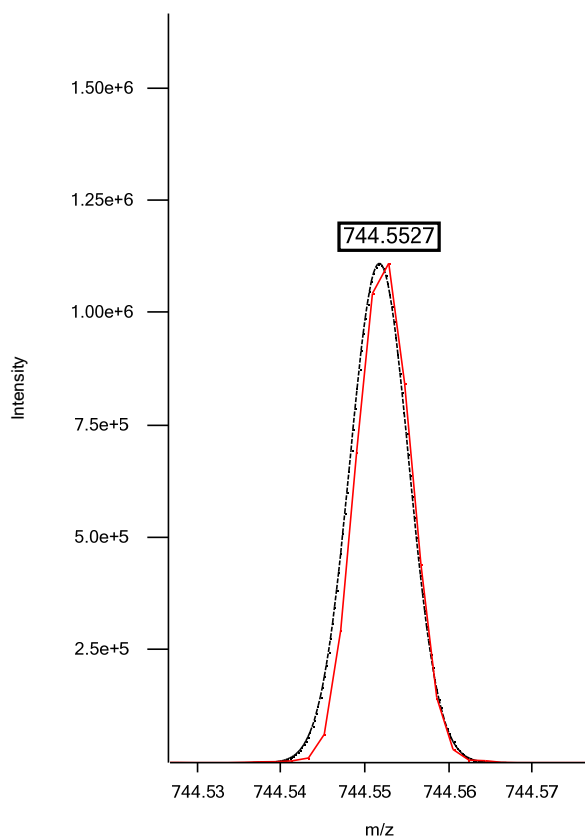

### Isotope 2

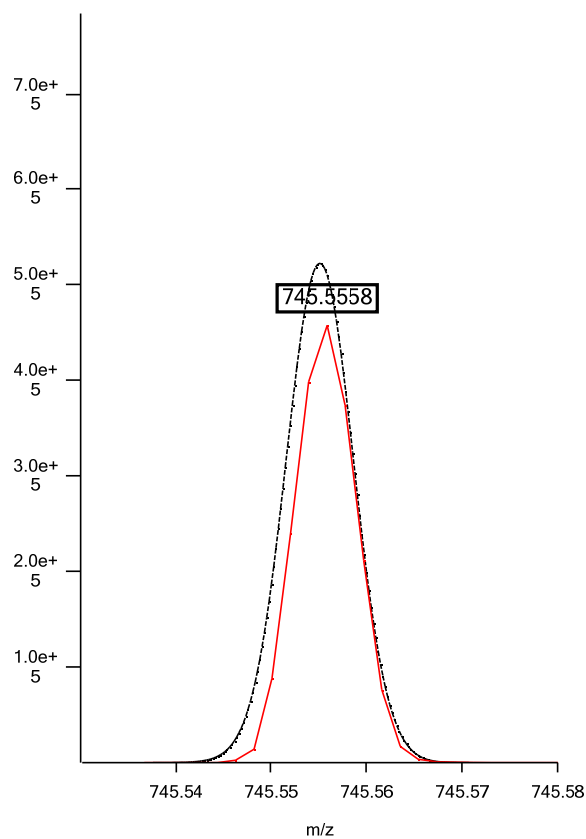

### Isotope 3

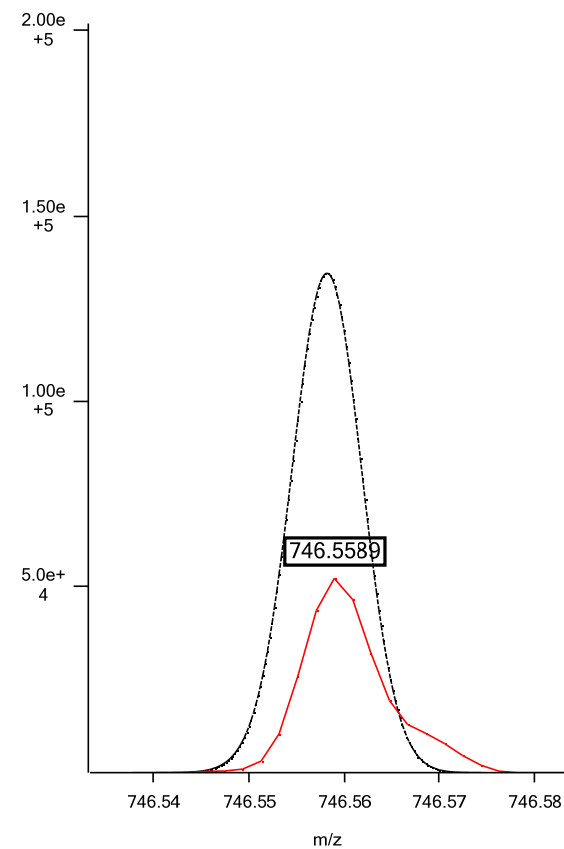

Positive ESI: PE 18:0p/18:1; C<sub>41</sub>H<sub>81</sub>NO<sub>7</sub>P; theoretical *m/z* 730.5750, (M+H)<sup>+</sup>; isotopic fit 0.024

### Isotope 1

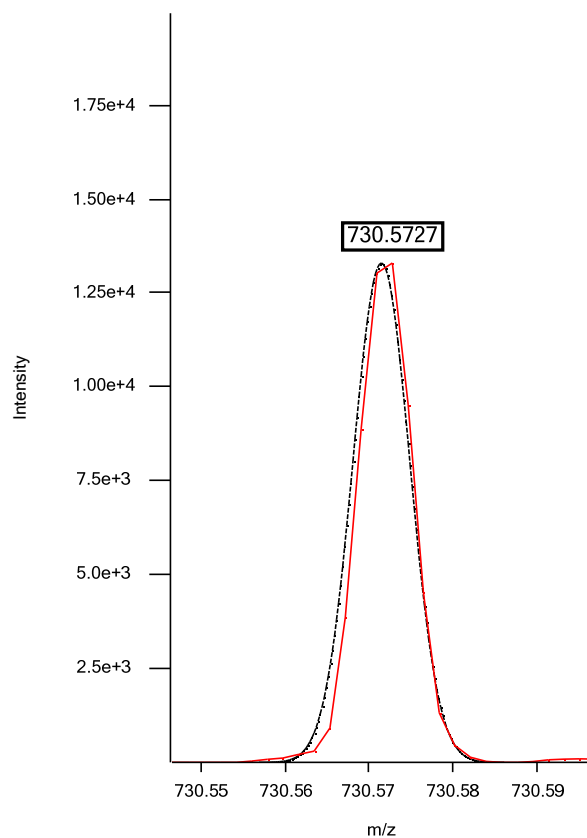

### Isotope 2

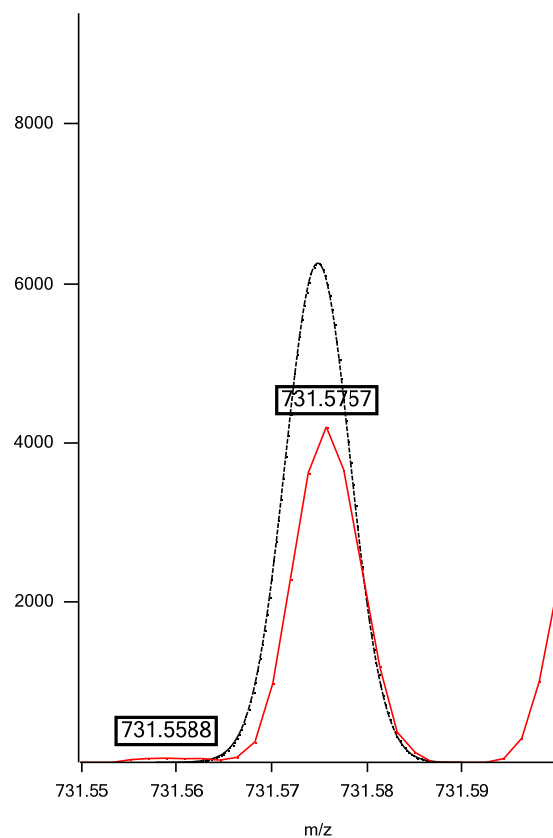

### Isotope 3

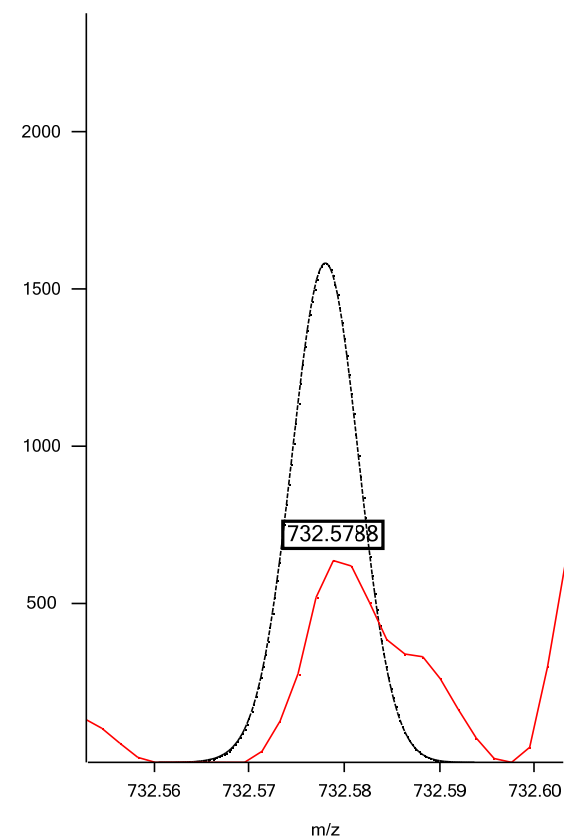

Positive ESI: PE 36:1; C<sub>41</sub>H<sub>81</sub>NO<sub>8</sub>P; theoretical *m/z* 746.5700, (M+H)<sup>+</sup>; isotopic fit 0.0073

### Isotope 1

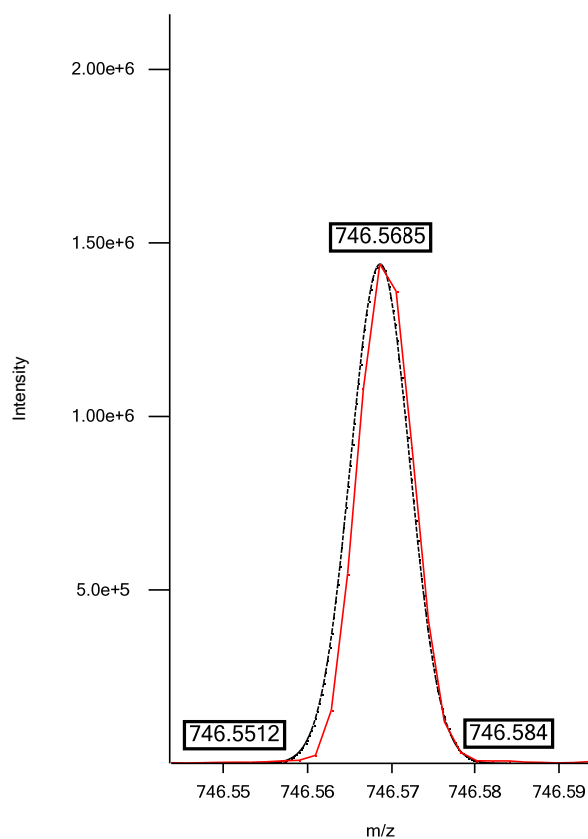

### Isotope 2

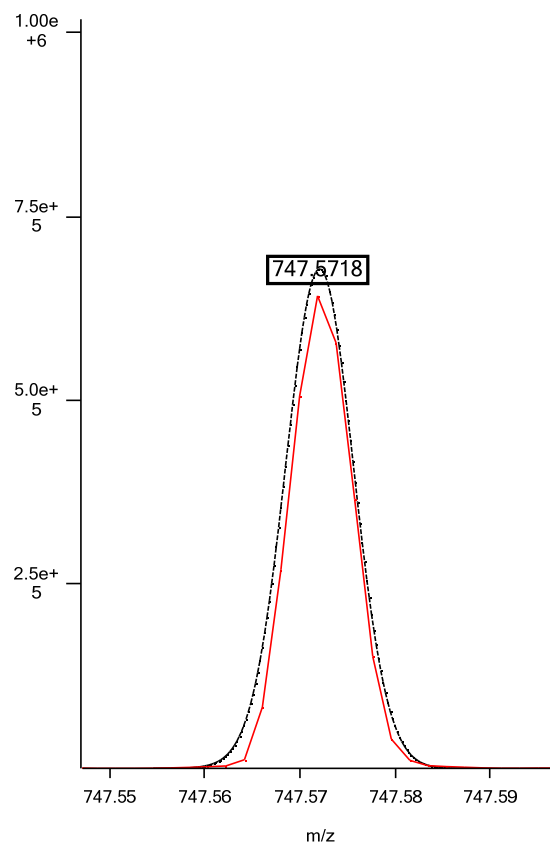

### Isotope 3

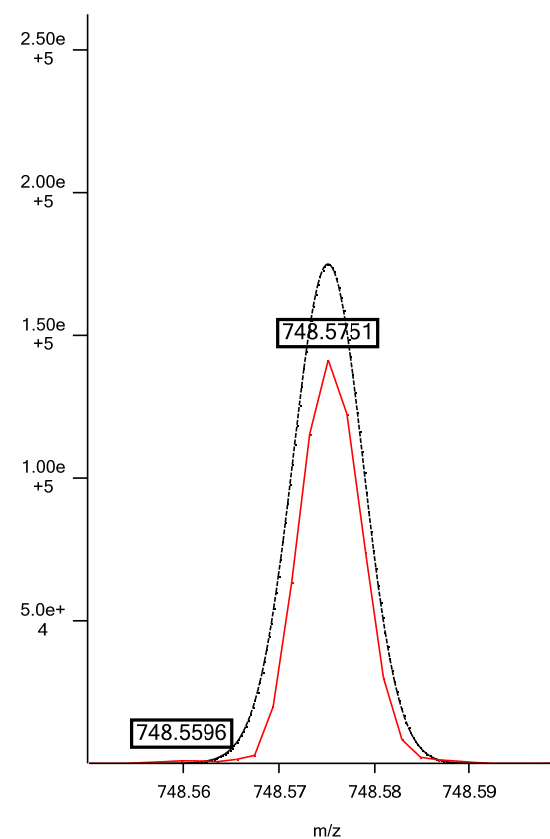

Negative ESI: PE 16:0p/22:6; C<sub>43</sub>H<sub>73</sub>NO<sub>7</sub>P; theoretical *m/z* 746.5124, (M-H)<sup>-</sup>; isotopic fit 0.0028

### Isotope 1

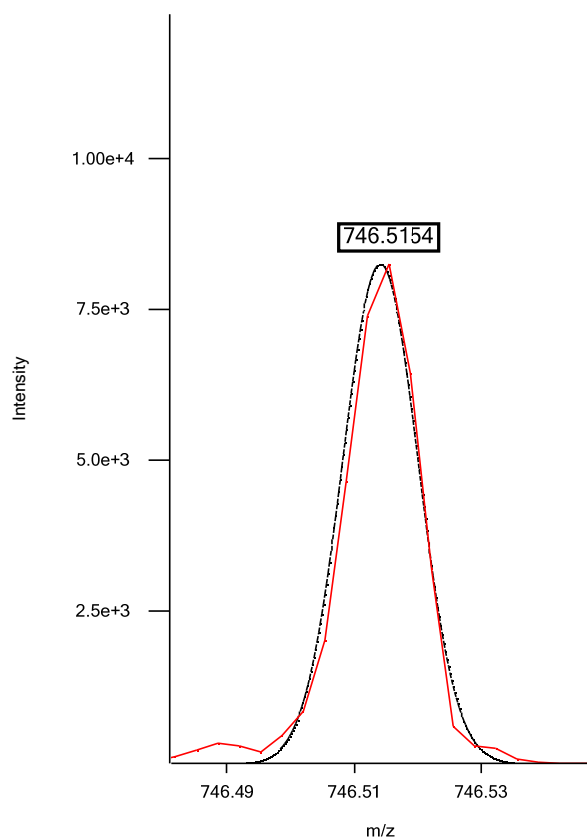

### Isotope 2

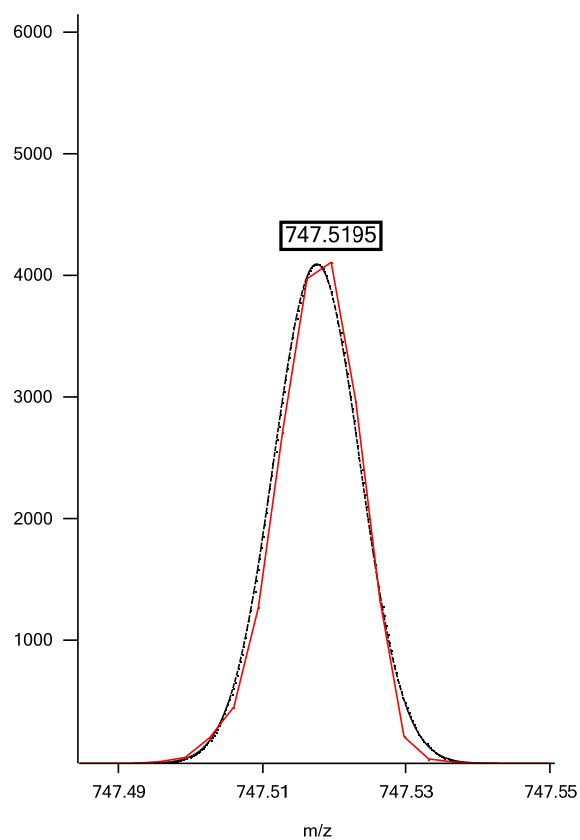

### Isotope 3

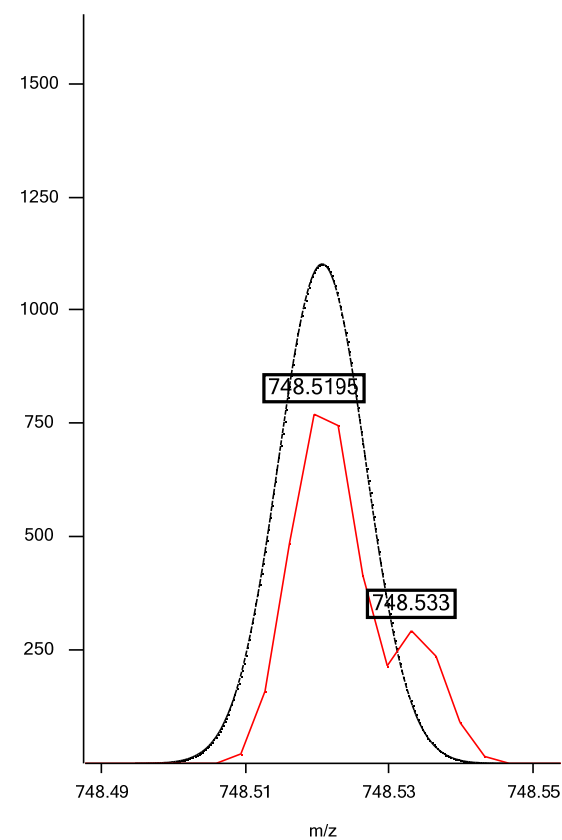



Positive ESI: PE 38:6; C<sub>43</sub>H<sub>75</sub>NO<sub>8</sub>P; theoretical  $m/z$  764.5230, (M+H)<sup>+</sup>; isotopic fit 0.0045

### Isotope 1

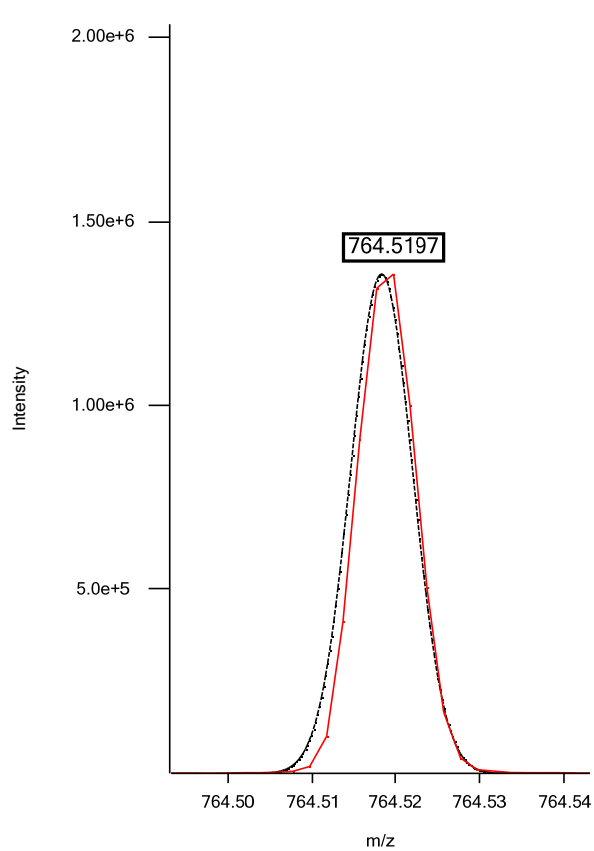

### Isotope 2

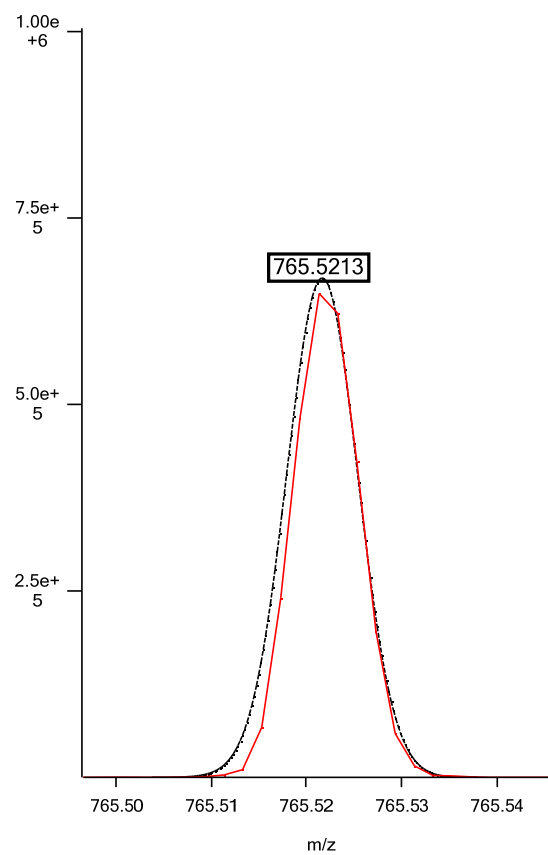

### Isotope 3

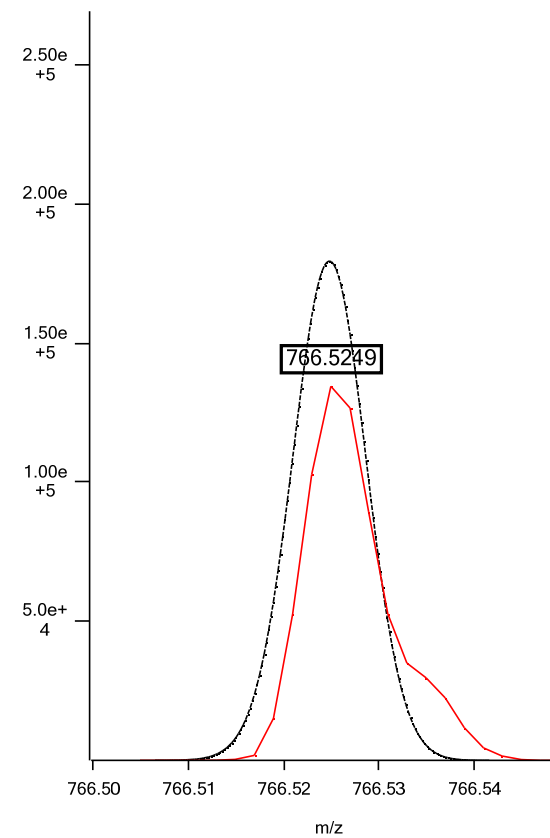

Positive ESI: PE 18:1p/20:4; C<sub>43</sub>H<sub>77</sub>NO<sub>7</sub>P; theoretical *m/z* 750.5437, (M+H)<sup>+</sup>; isotopic fit 0.0172

### Isotope 1

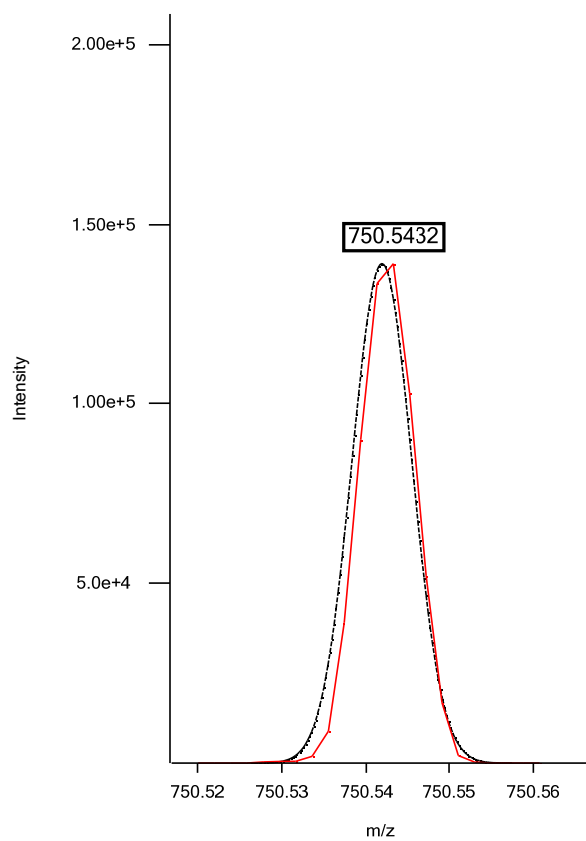

### Isotope 2

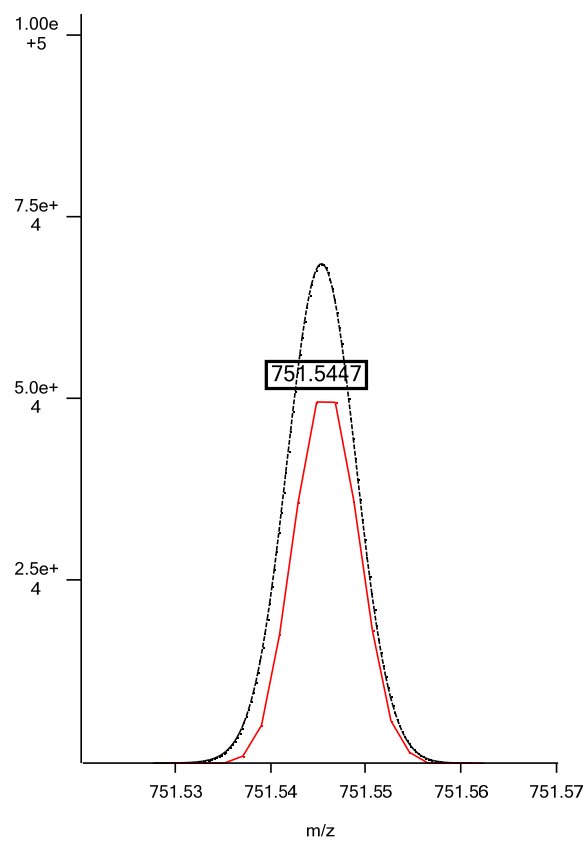

### Isotope 3

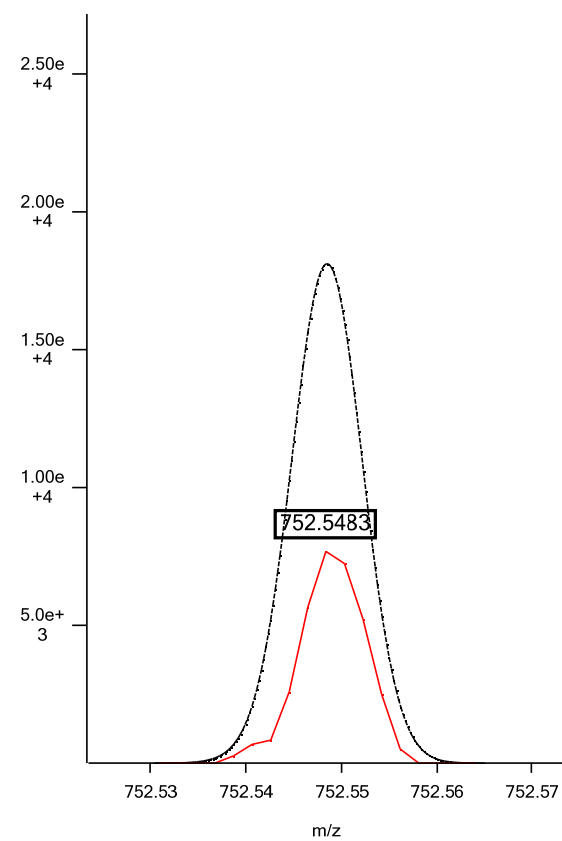

Positive ESI: PE 38:5; C<sub>43</sub>H<sub>77</sub>NO<sub>8</sub>P; theoretical *m/z* 766.5387, (M+H)<sup>+</sup>; isotopic fit 0.0052

### Isotope 1

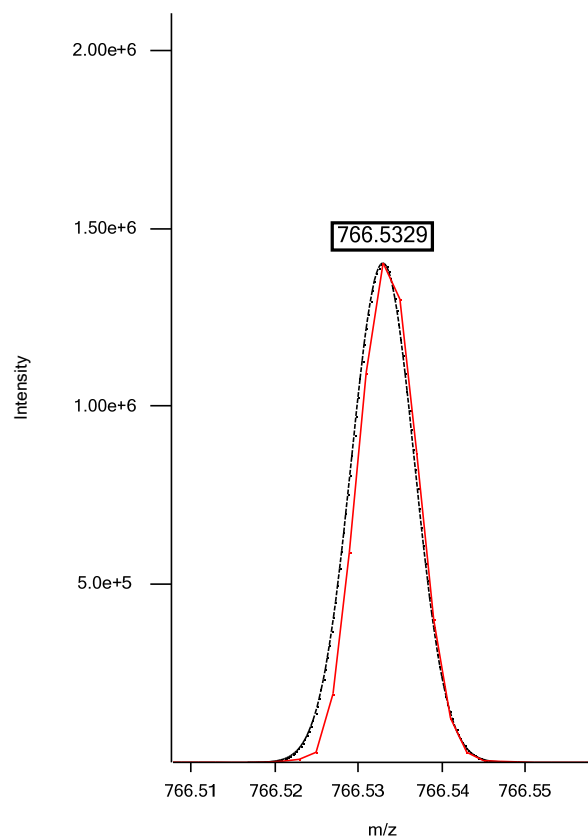

### Isotope 2

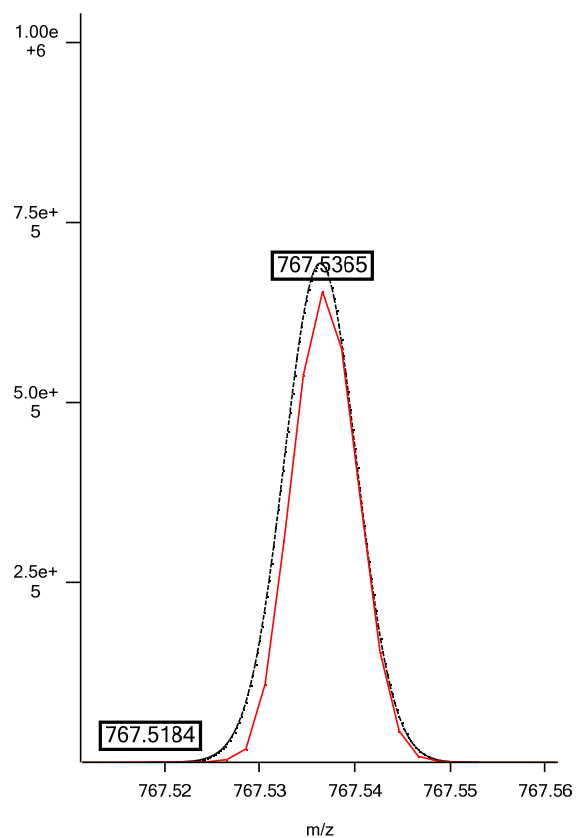

### Isotope 3

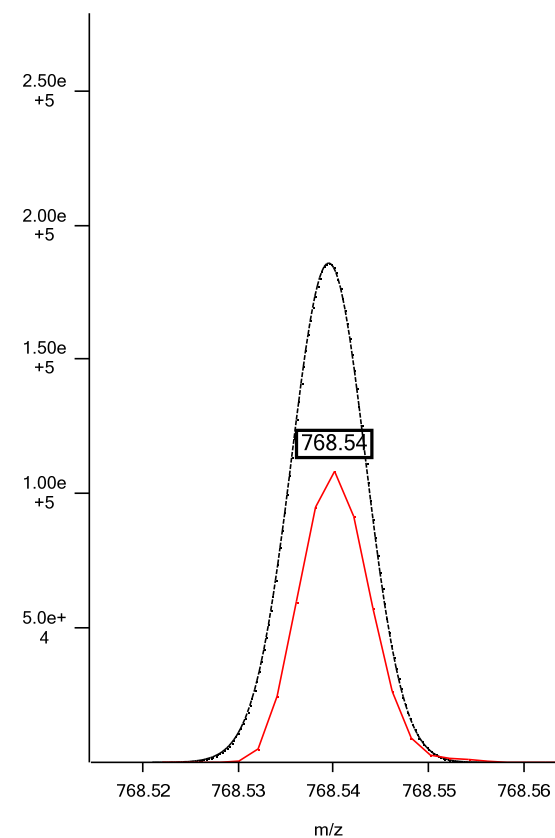

Positive ESI: PE 18:0p/20:4; C<sub>43</sub>H<sub>79</sub>NO<sub>7</sub>P; theoretical *m/z* 752.5594, (M+H)<sup>+</sup>; isotopic fit 0.0156

### Isotope 1

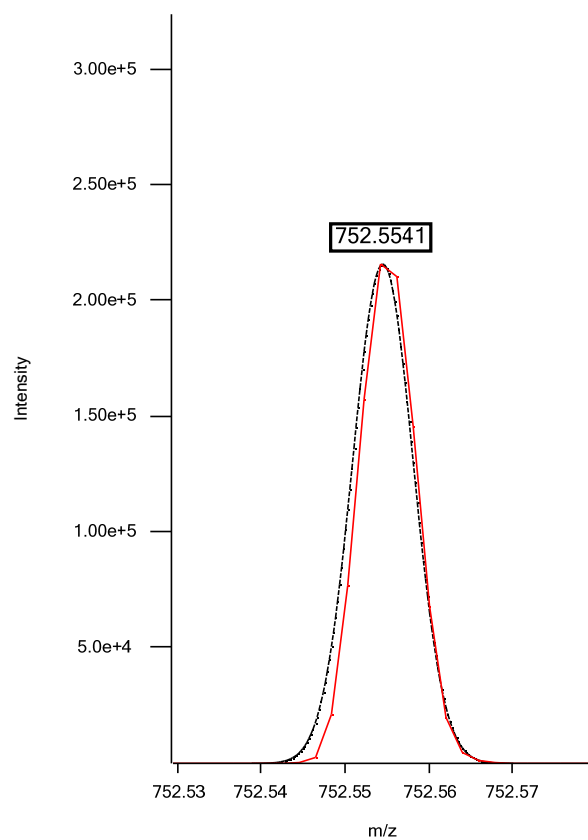

### Isotope 2

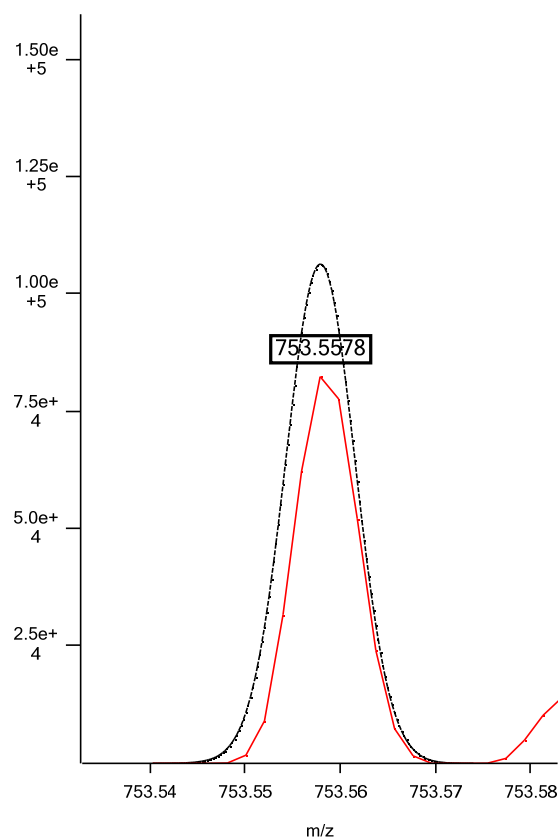

### Isotope 3

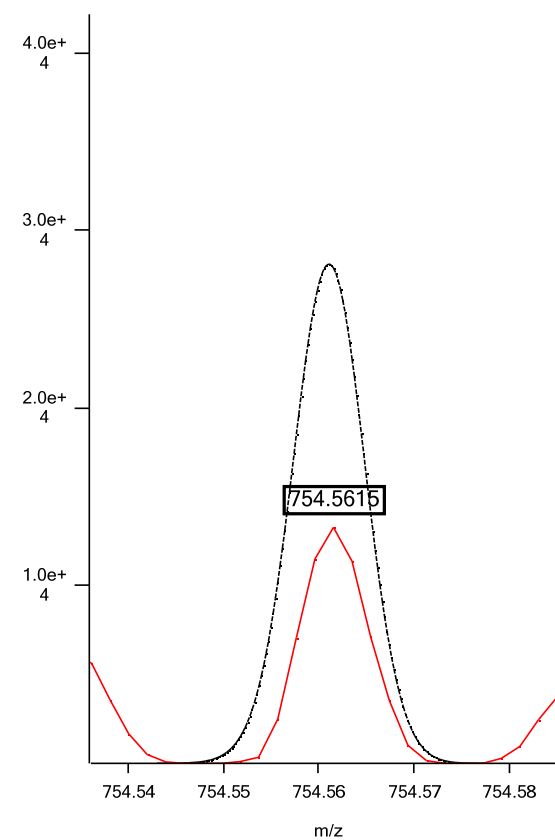

Positive ESI: PE 38:4; C<sub>43</sub>H<sub>79</sub>NO<sub>8</sub>P; theoretical  $m/z$  768.5543, (M+H)<sup>+</sup>; isotopic fit 0.0038

### Isotope 1

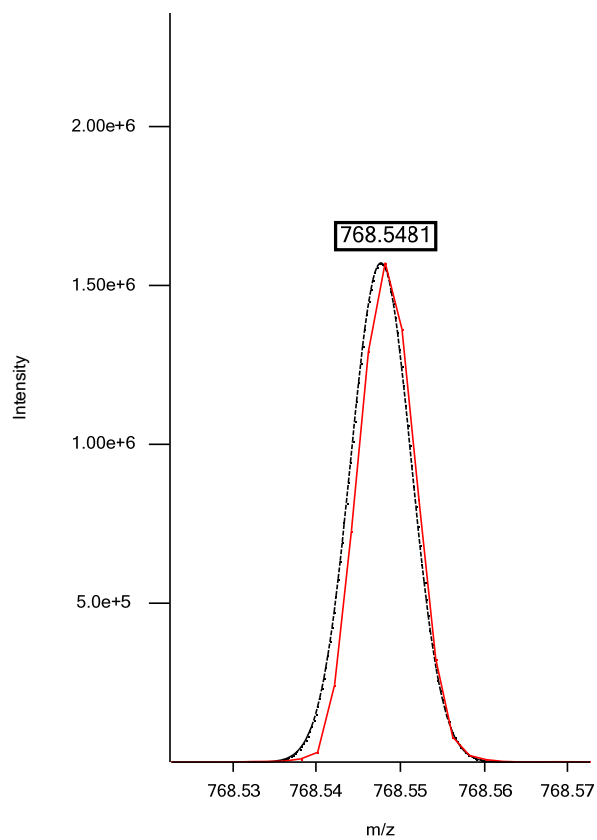

### Isotope 2

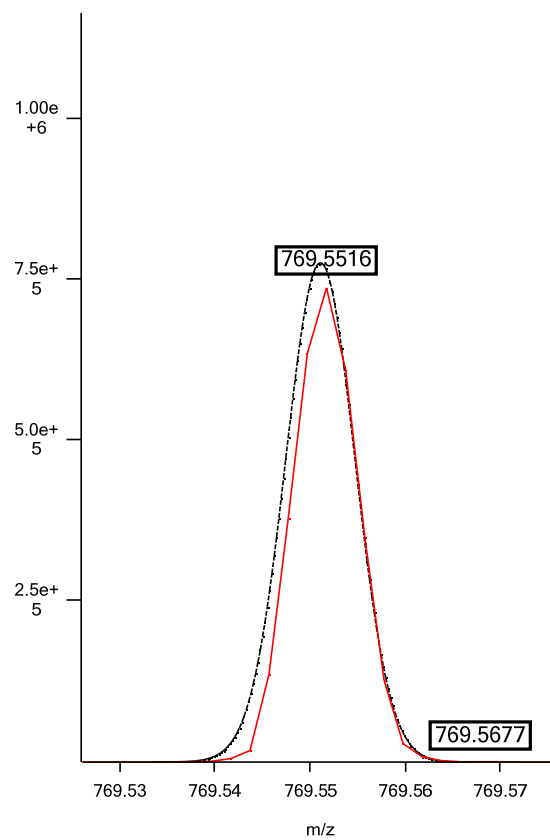

### Isotope 3

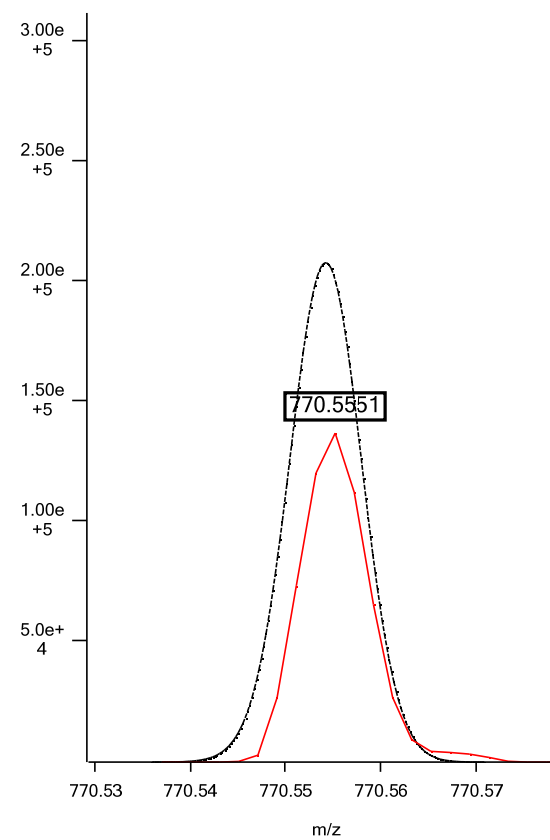

Positive ESI: PE 38:3; C<sub>43</sub>H<sub>81</sub>NO<sub>8</sub>P; theoretical  $m/z$  770.5700, (M+H)<sup>+</sup>; isotopic fit 0.0196

### Isotope 1

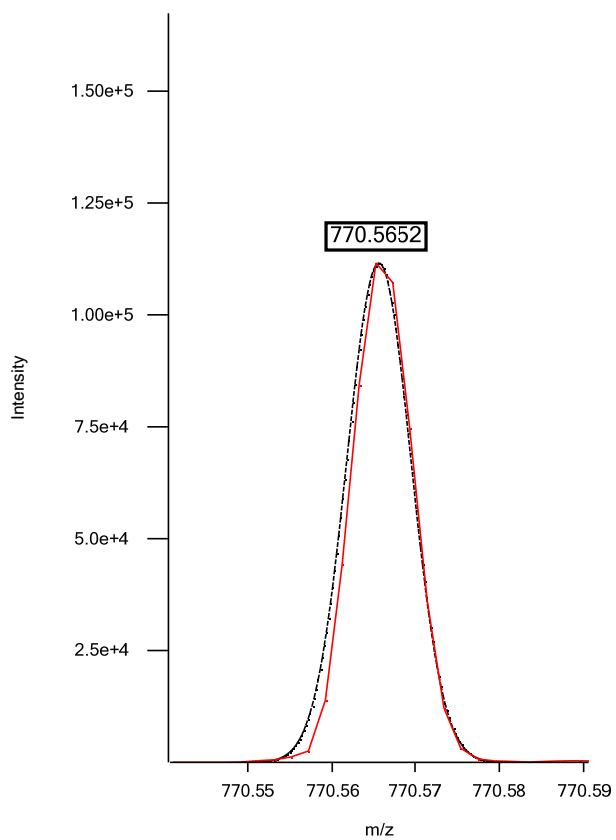

### Isotope 2

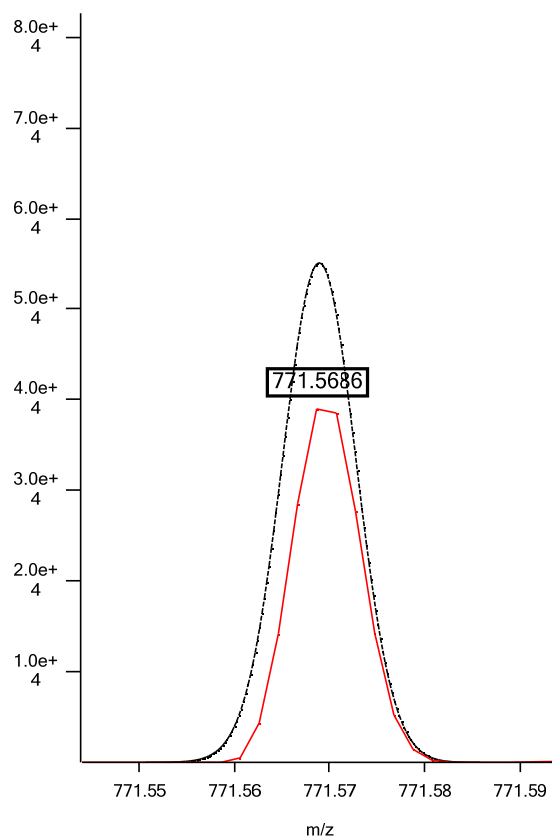

### Isotope 3

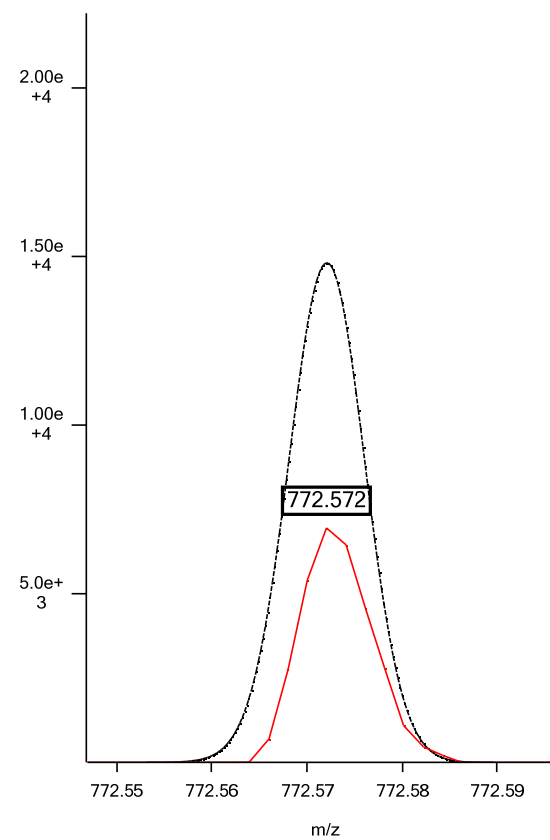

# Glycerophosphocholines

Positive ESI: LPC 14:0; C<sub>22</sub>H<sub>47</sub>NO<sub>7</sub>P; theoretical  $m/z$  468.3090, (M+H)<sup>+</sup>; isotopic fit 0.0208

### Isotope 1

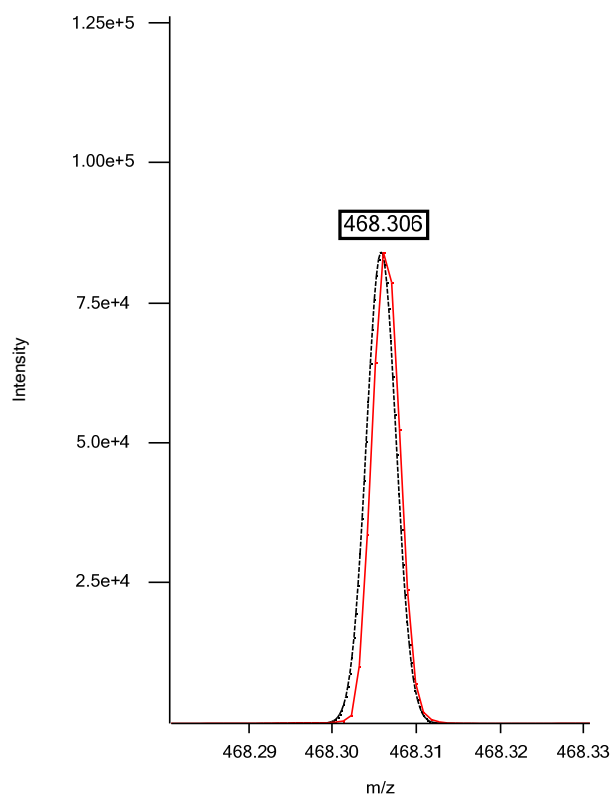

### Isotope 2

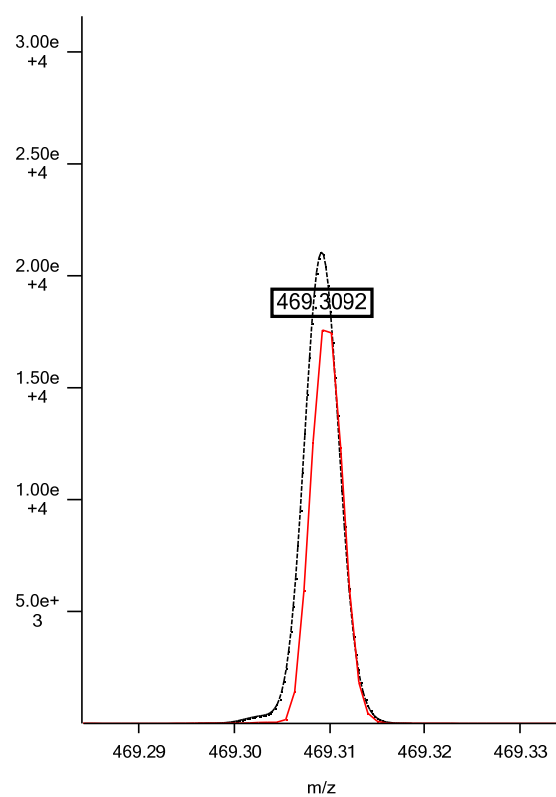

### Isotope 3

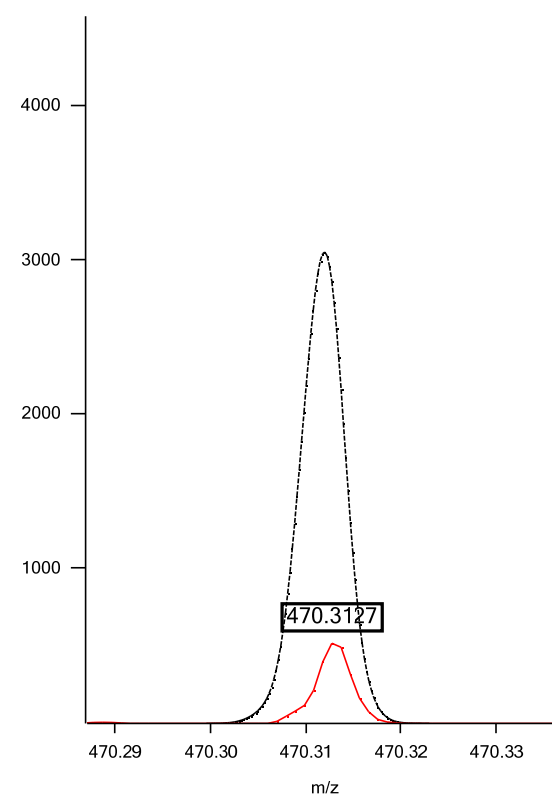



Positive ESI: LPC 15:0; C<sub>23</sub>H<sub>49</sub>NO<sub>7</sub>P; theoretical  $m/z$  482.3247, (M+H)<sup>+</sup>; isotopic fit 0.0302

### Isotope 1

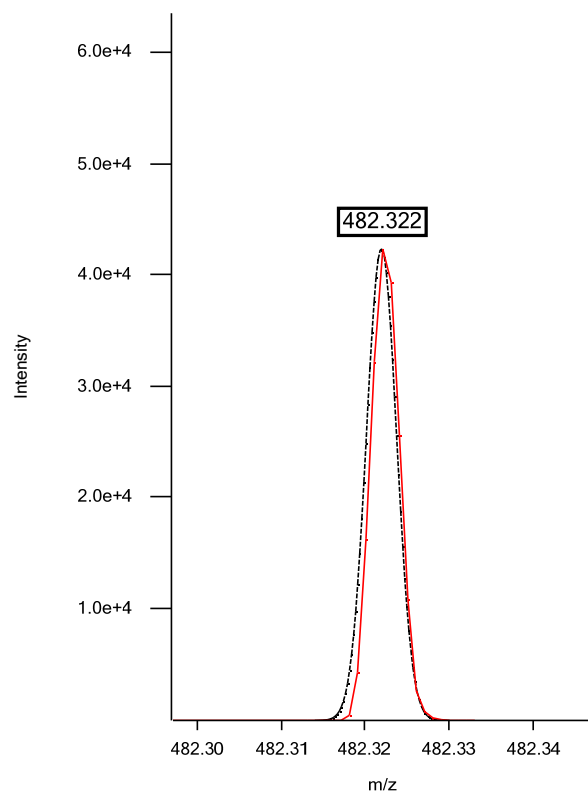

### Isotope 2

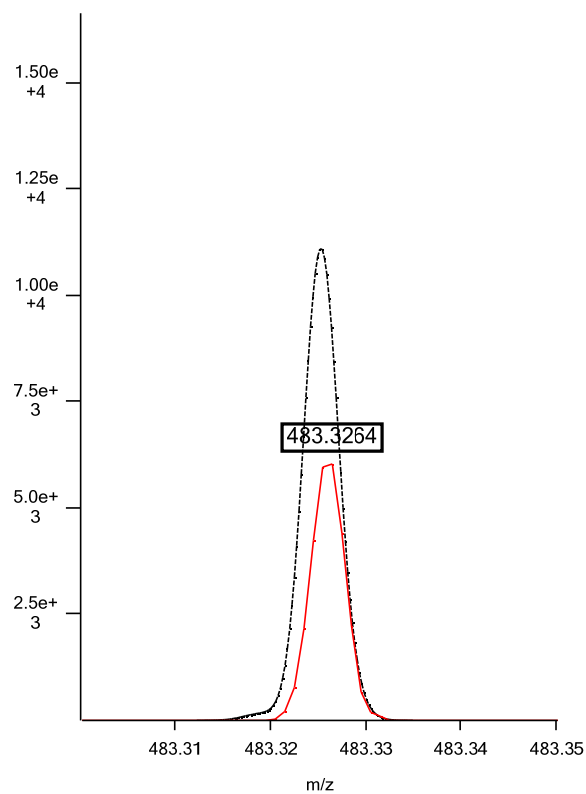

### Isotope 3

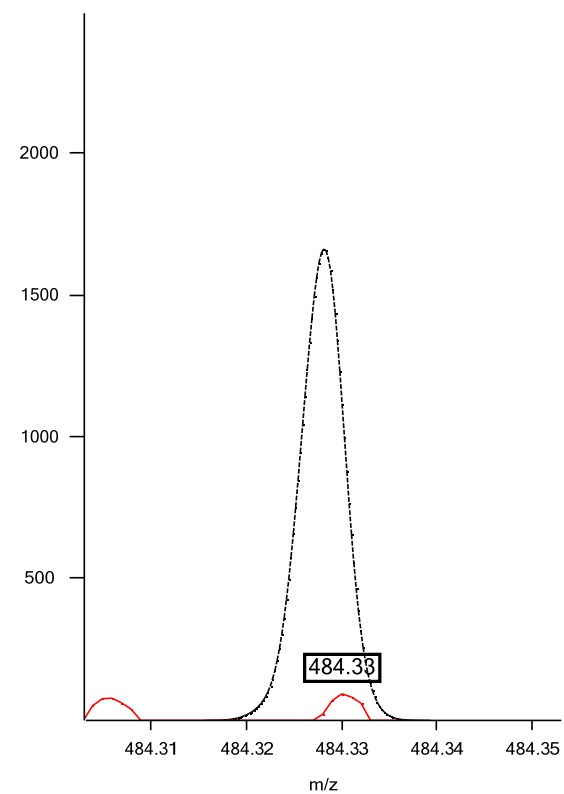

Positive ESI: LPC 16:1; C<sub>24</sub>H<sub>49</sub>NO<sub>7</sub>P; theoretical *m/z* 494.3247, (M+H)<sup>+</sup>; isotopic fit 0.0034

### Isotope 1

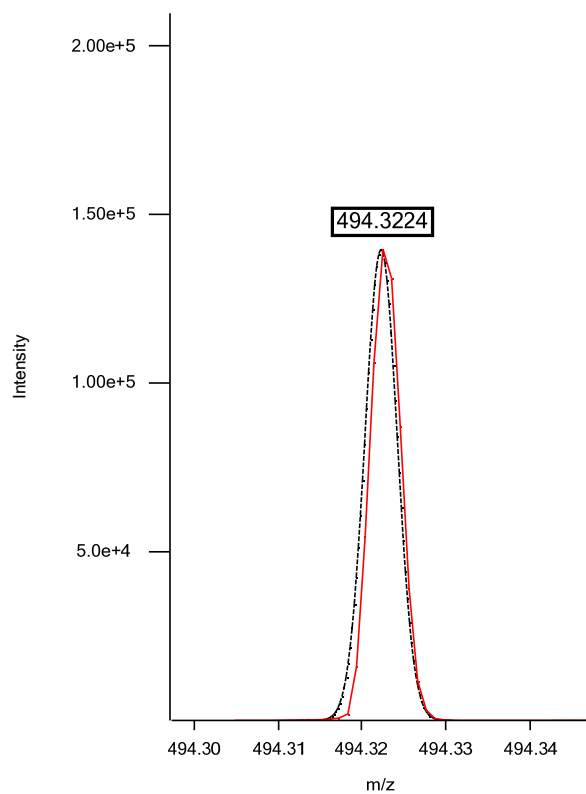

### Isotope 2

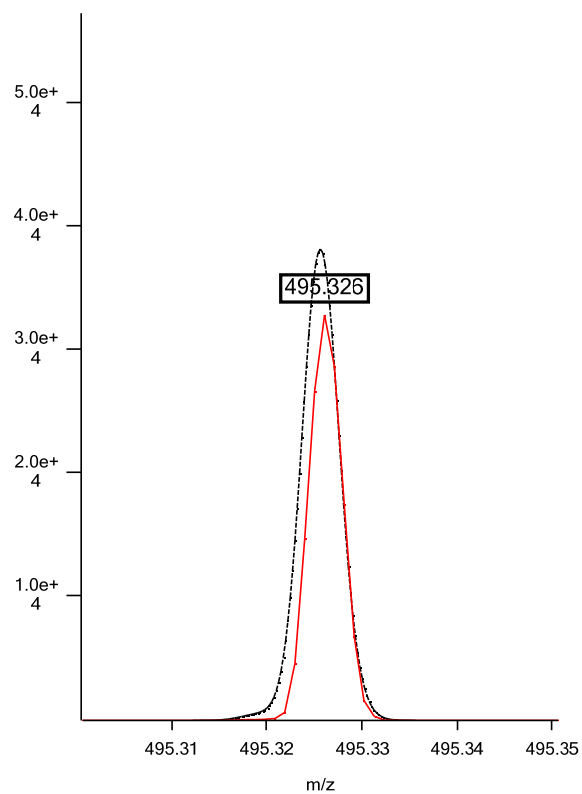

### Isotope 3

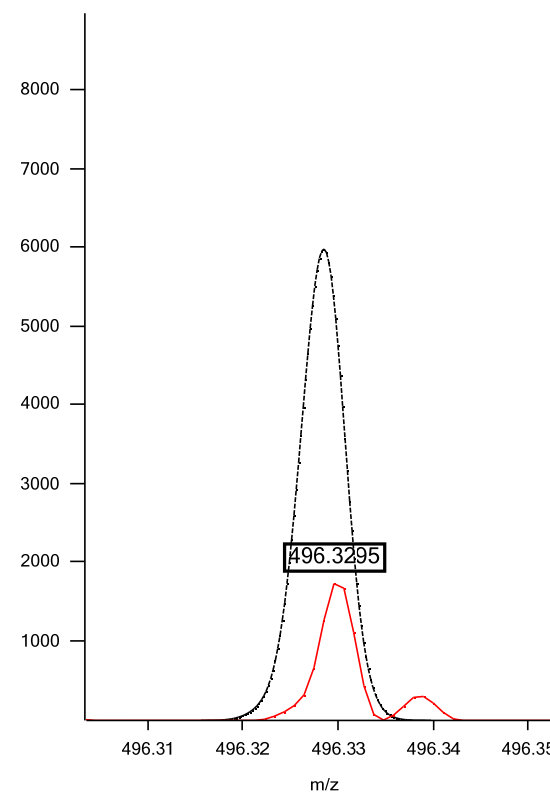

Positive ESI: LPC 16:0; C<sub>24</sub>H<sub>51</sub>NO<sub>7</sub>P; theoretical  $m/z$  496.3403, (M+H)<sup>+</sup>; isotopic fit 0.0036

### Isotope 1

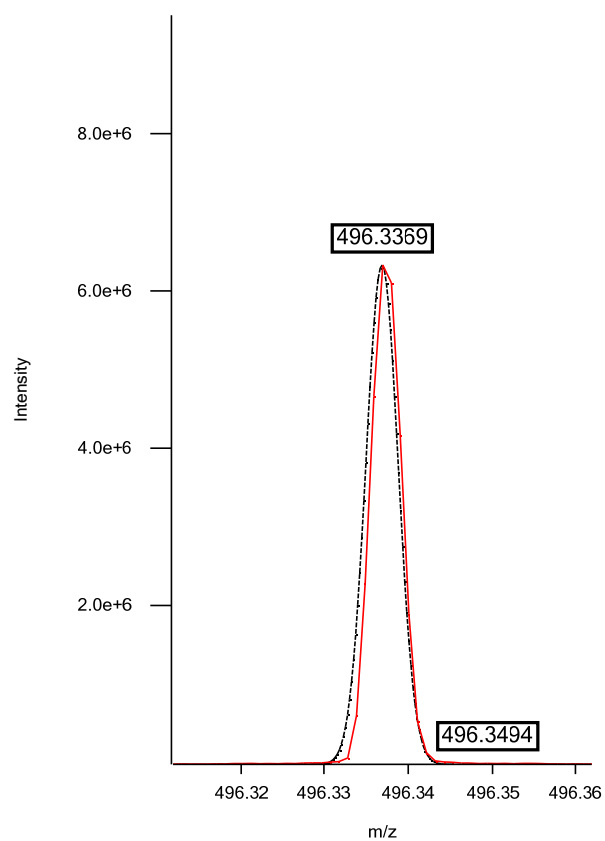

### Isotope 2

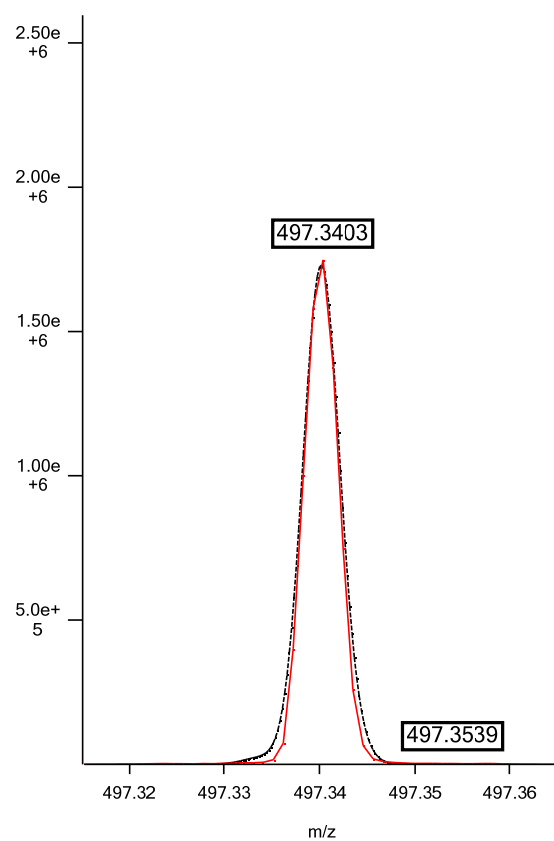

### Isotope 3

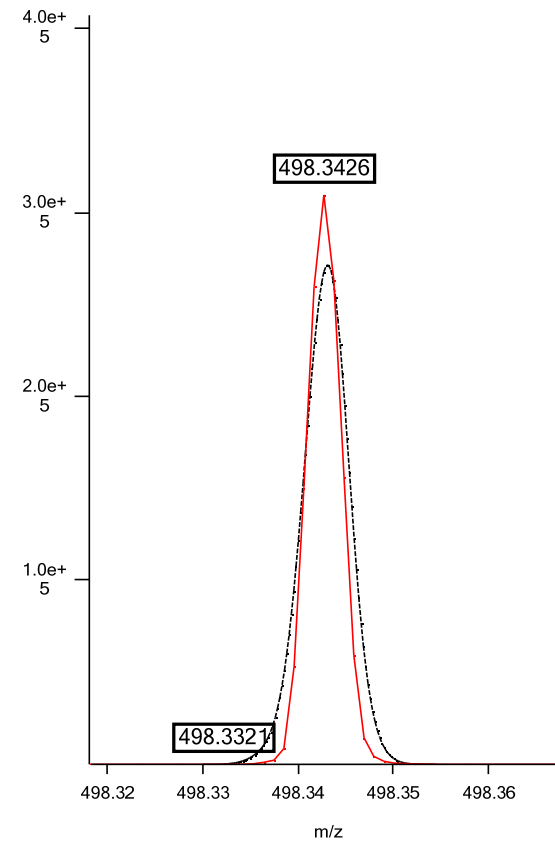

Positive ESI: LPC 17:0; C<sub>25</sub>H<sub>53</sub>NO<sub>7</sub>P; theoretical  $m/z$  510.3560, (M+H)<sup>+</sup>; isotopic fit 0.0037

### Isotope 1

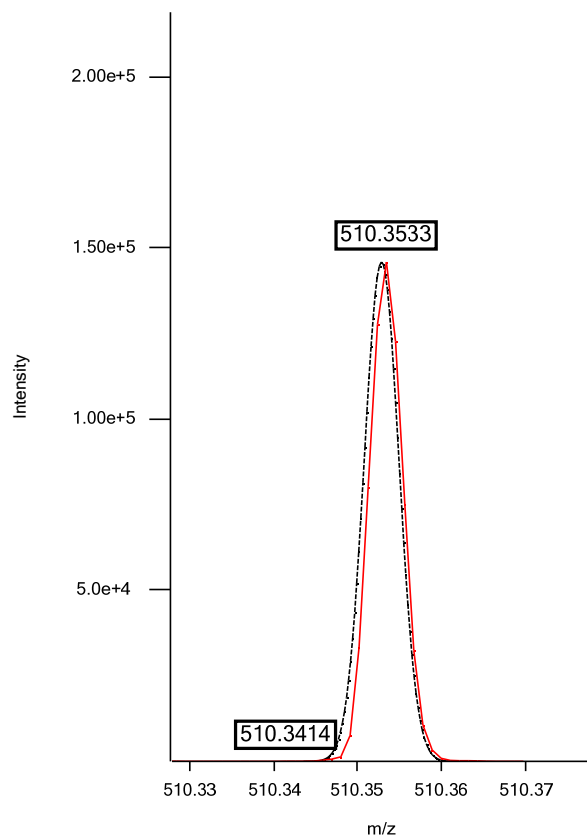

### Isotope 2

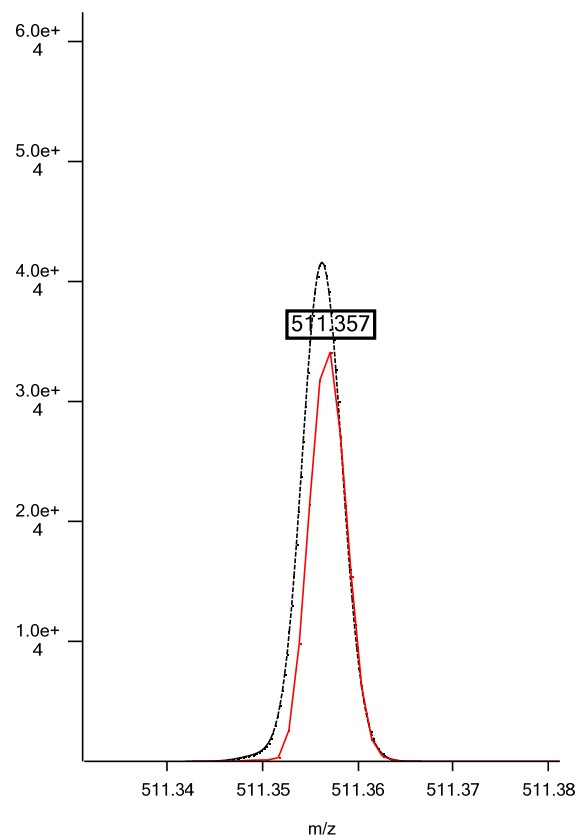

### Isotope 3

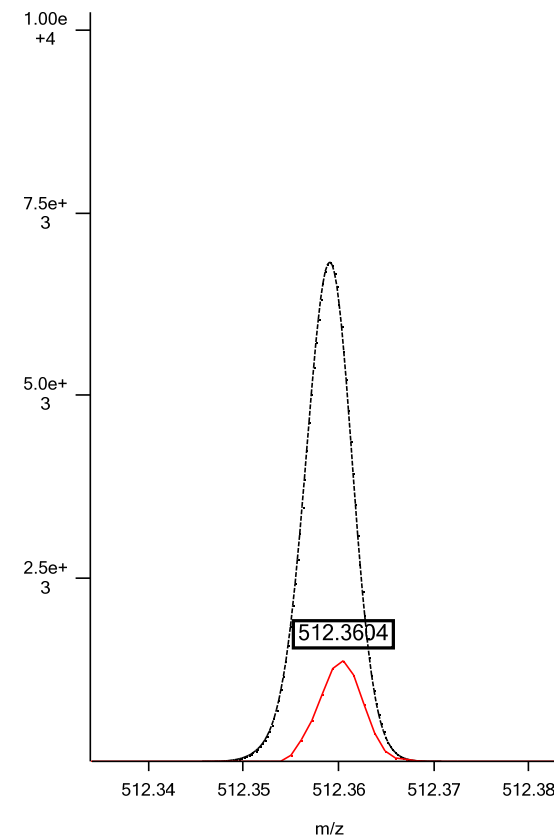

Positive ESI: LPC 18:3; C<sub>26</sub>H<sub>49</sub>NO<sub>7</sub>P; theoretical  $m/z$  518.3246, (M+H)<sup>+</sup>; isotopic fit 0.0326

### Isotope 1

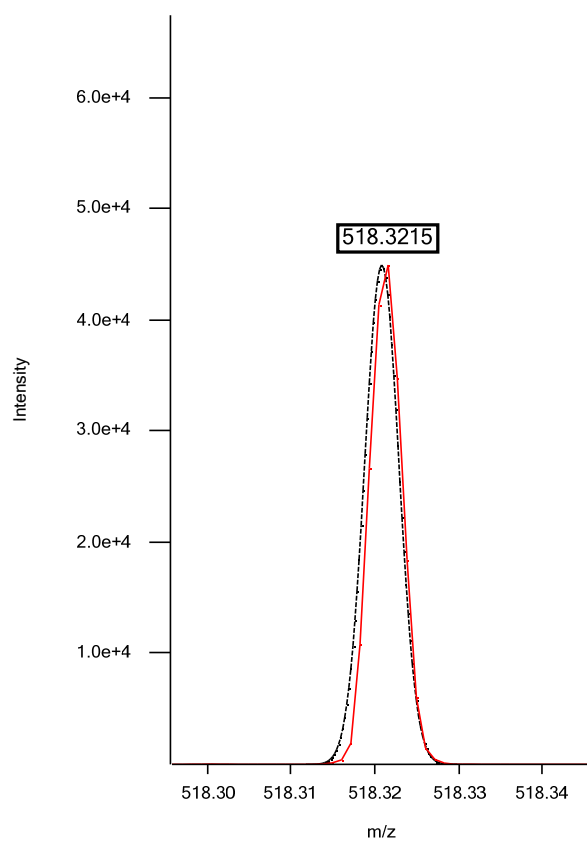

### Isotope 2

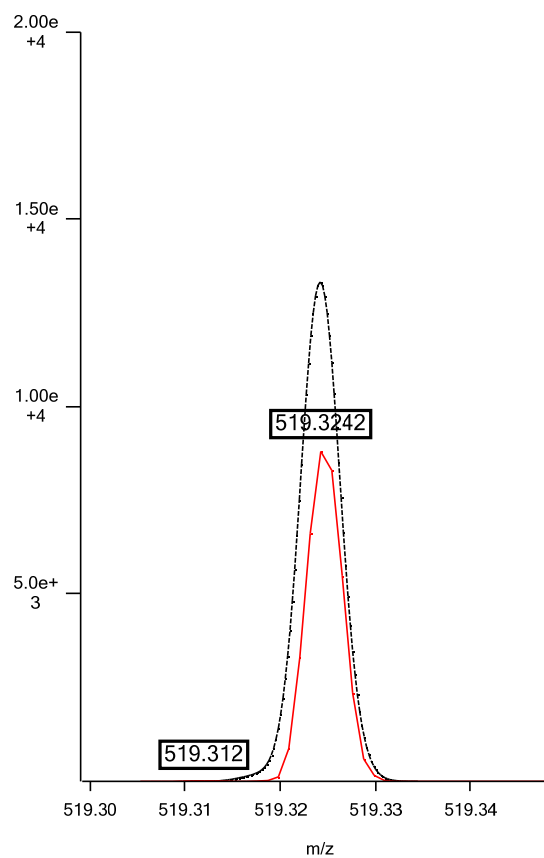

### Isotope 3

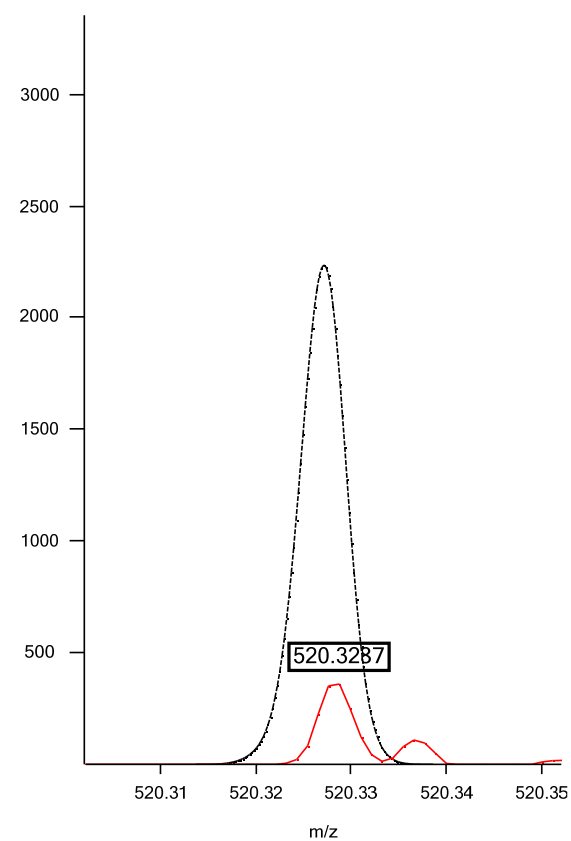

Positive ESI: LPC 18:2; C<sub>26</sub>H<sub>51</sub>NO<sub>7</sub>P; theoretical  $m/z$  520.3403, (M+H)<sup>+</sup>; isotopic fit 0.0113

### Isotope 1

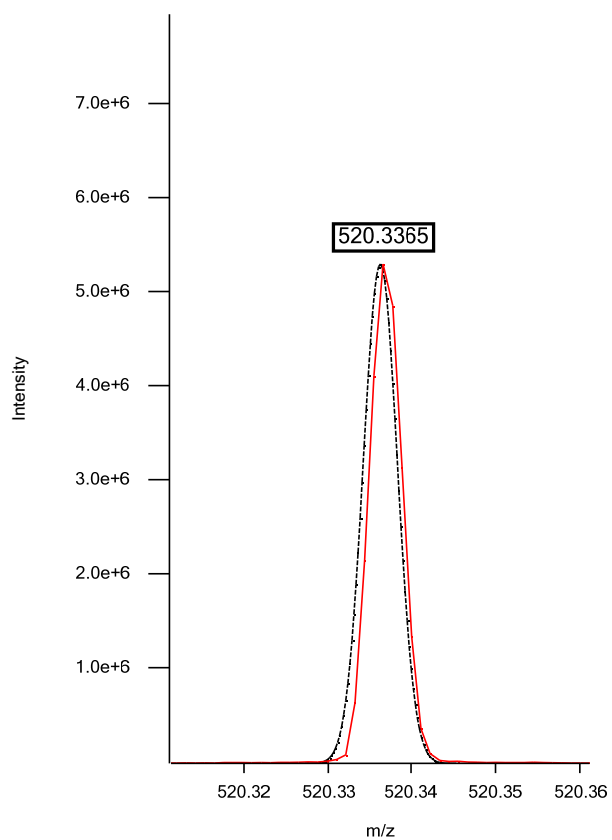

### Isotope 2

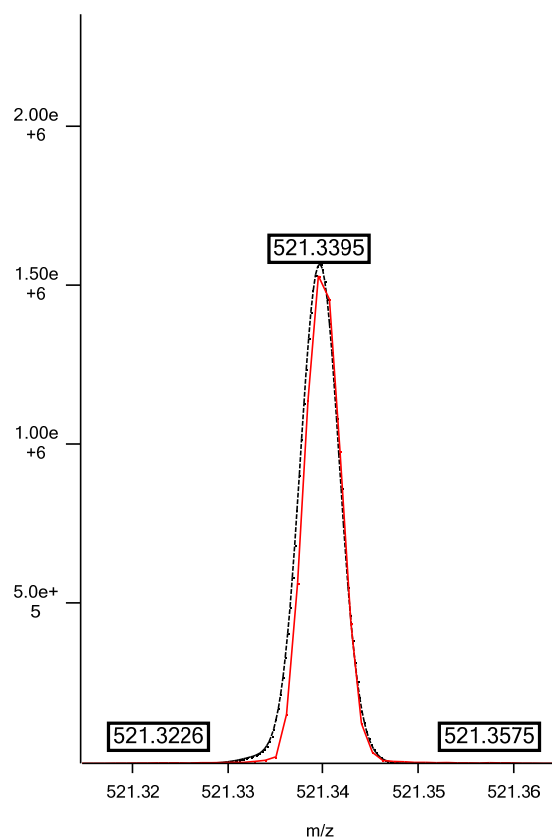

### Isotope 3

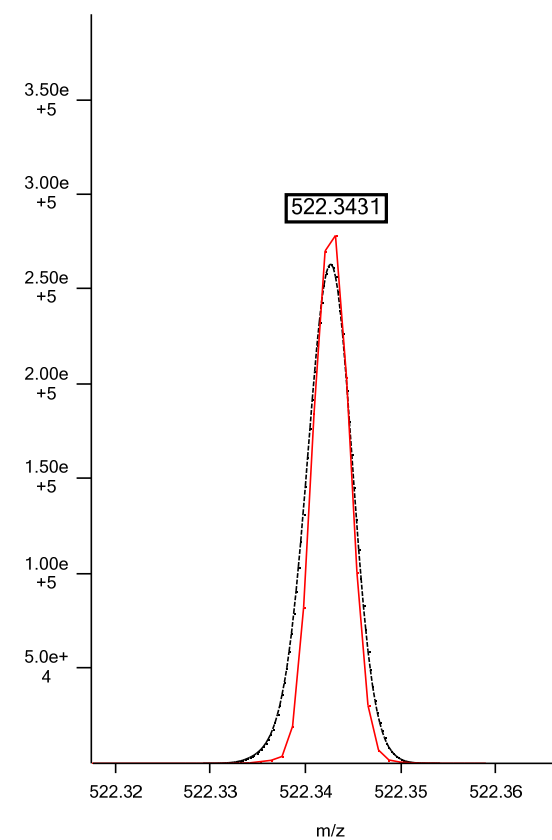

Positive ESI: LPC 18:1; C<sub>26</sub>H<sub>53</sub>NO<sub>7</sub>P; theoretical  $m/z$  522.3559, (M+H)<sup>+</sup>; isotopic fit 0.0032

### Isotope 1

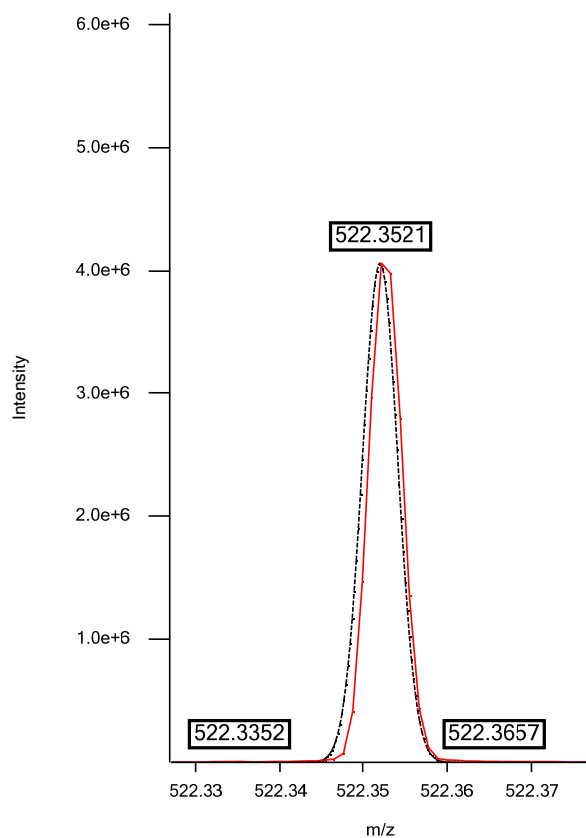

### Isotope 2

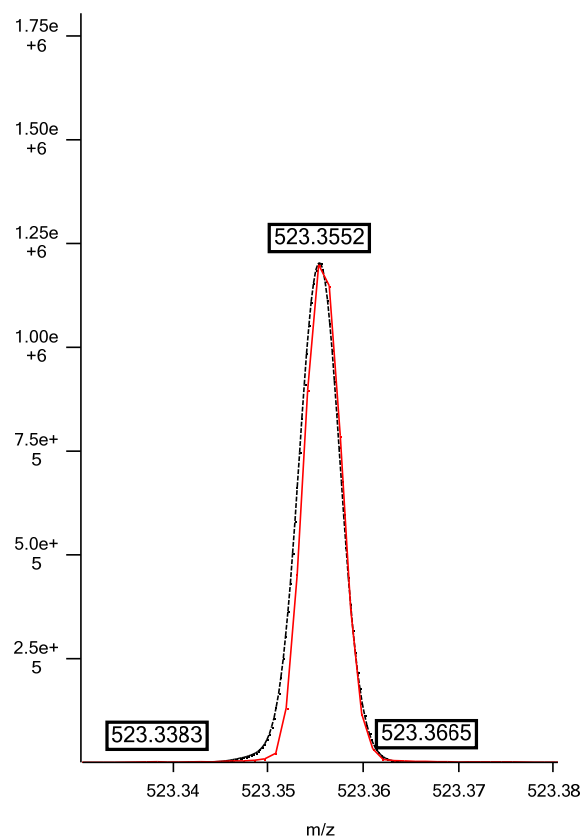

### Isotope 3

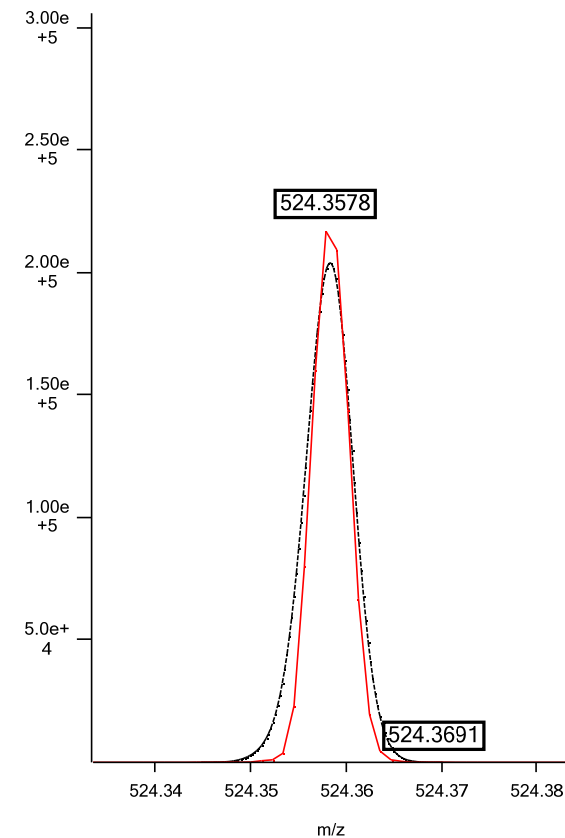

Positive ESI: LPC 18:0; C<sub>26</sub>H<sub>55</sub>NO<sub>7</sub>P; theoretical *m/z* 524.3716, (M+H)<sup>+</sup>; isotopic fit 0.0014

### Isotope 1

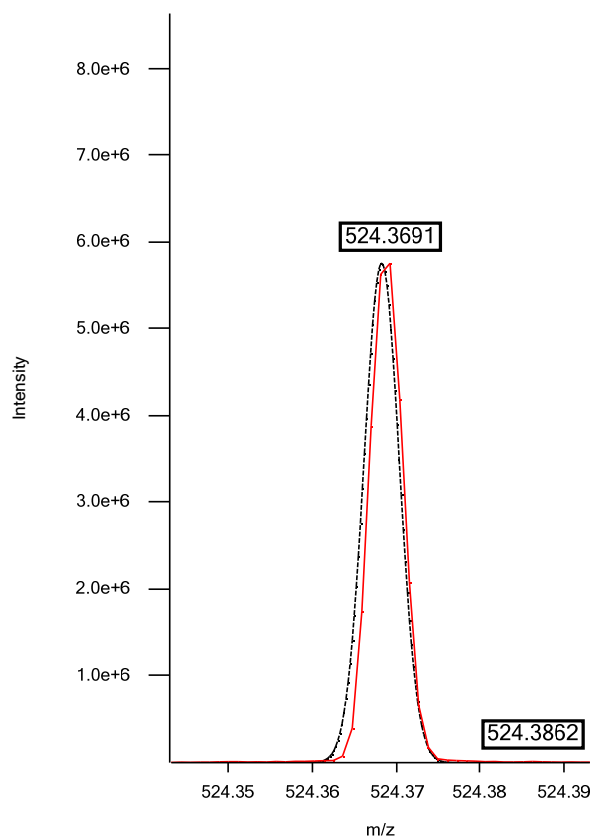

### Isotope 2

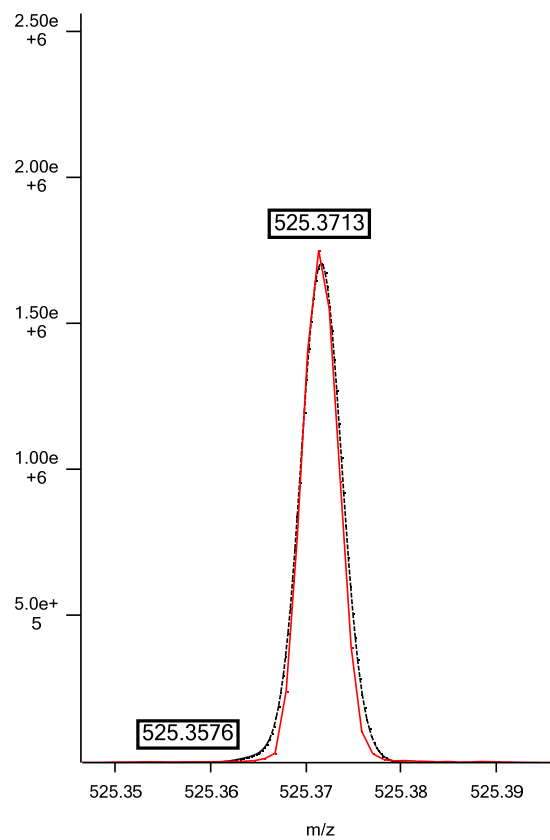

### Isotope 3

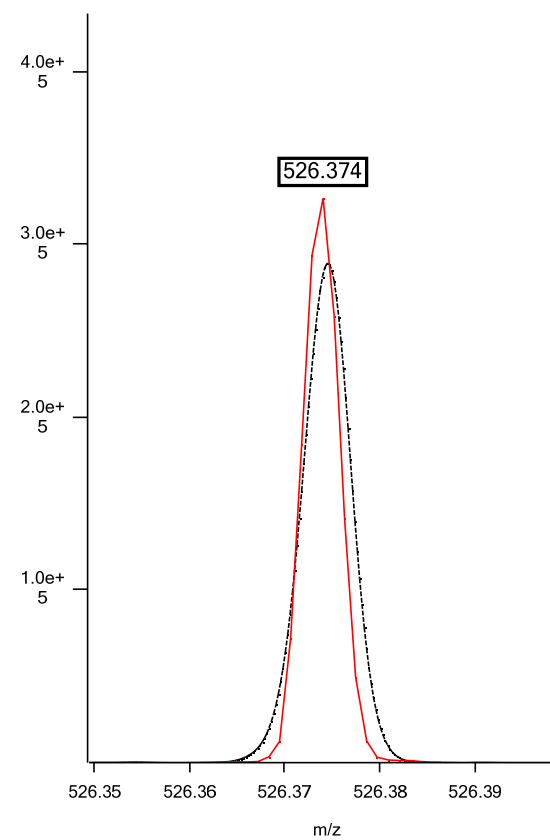



Positive ESI: LPC 19:0; C<sub>27</sub>H<sub>57</sub>NO<sub>7</sub>P; theoretical *m/z* 538.3872, (M+H)<sup>+</sup>; isotopic fit 0.0186

### Isotope 1

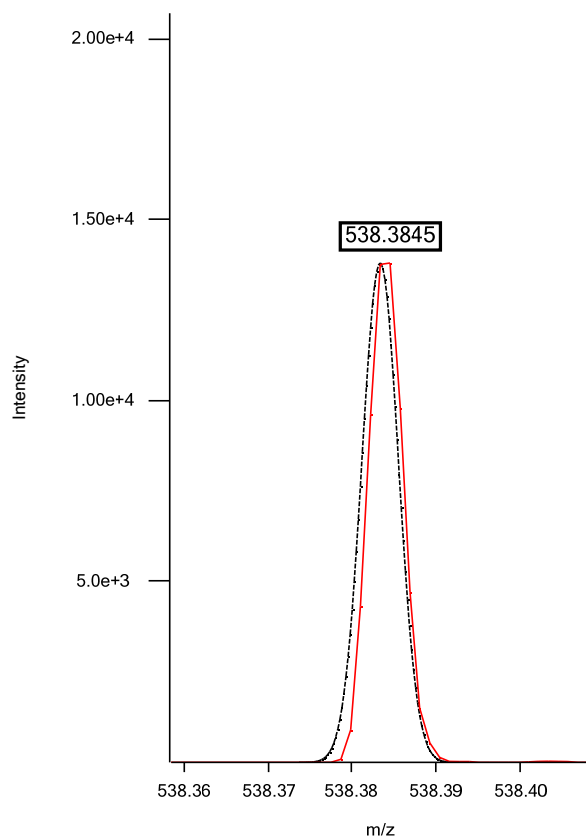

### Isotope 2

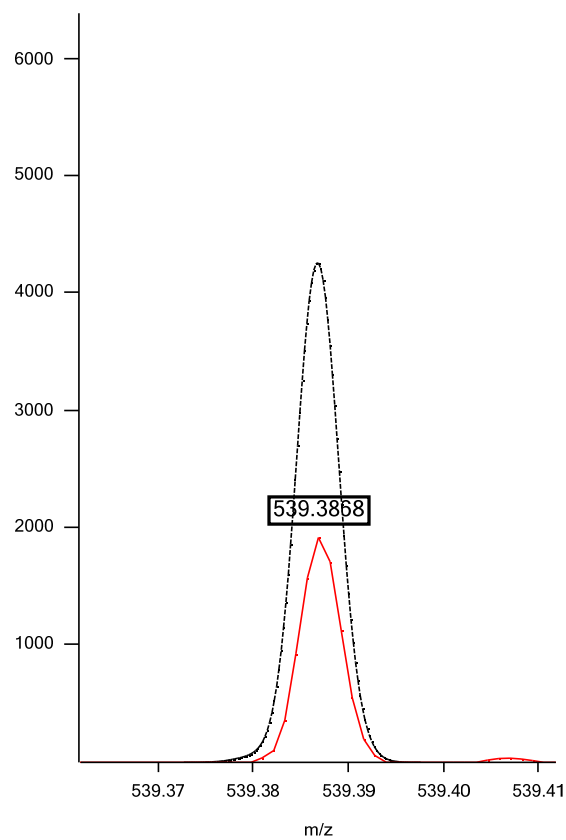

### Isotope 3

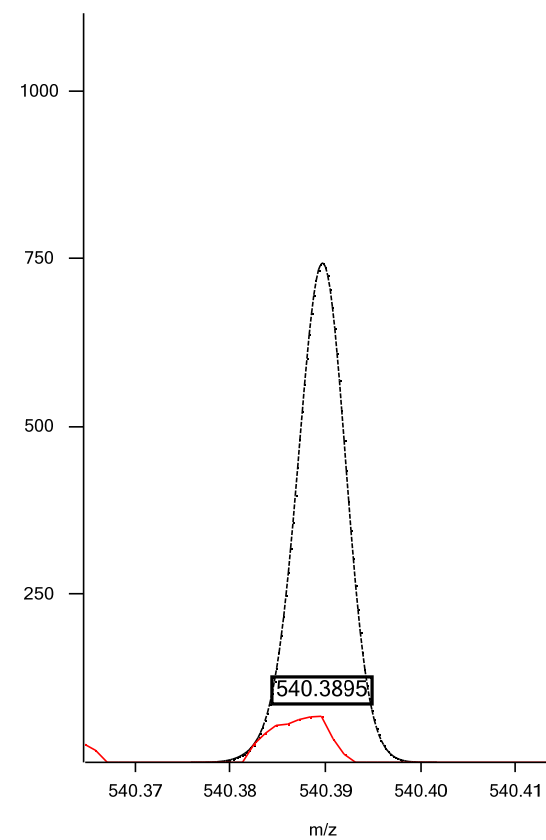

Positive ESI: LPC 20:5; C<sub>28</sub>H<sub>49</sub>NO<sub>7</sub>P; theoretical *m/z* 542.3246, (M+H)<sup>+</sup>; isotopic fit 0.0029

### Isotope 1

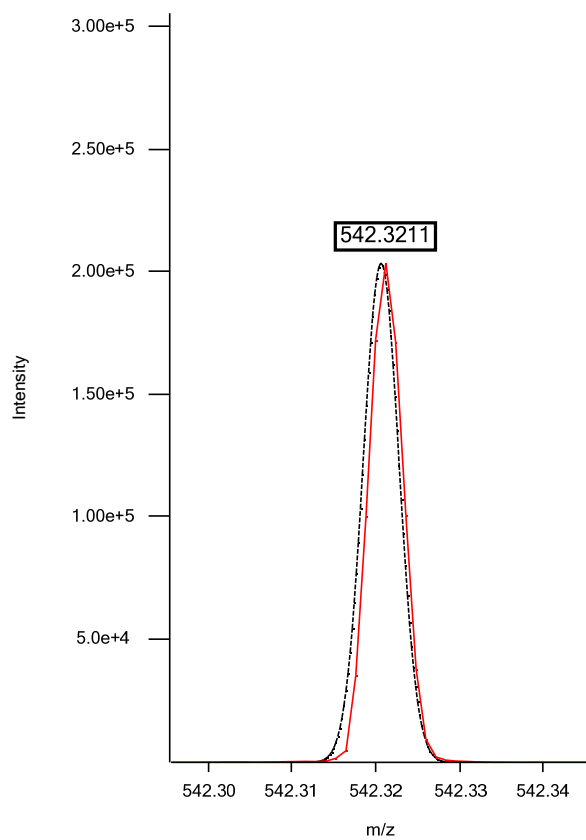

### Isotope 2

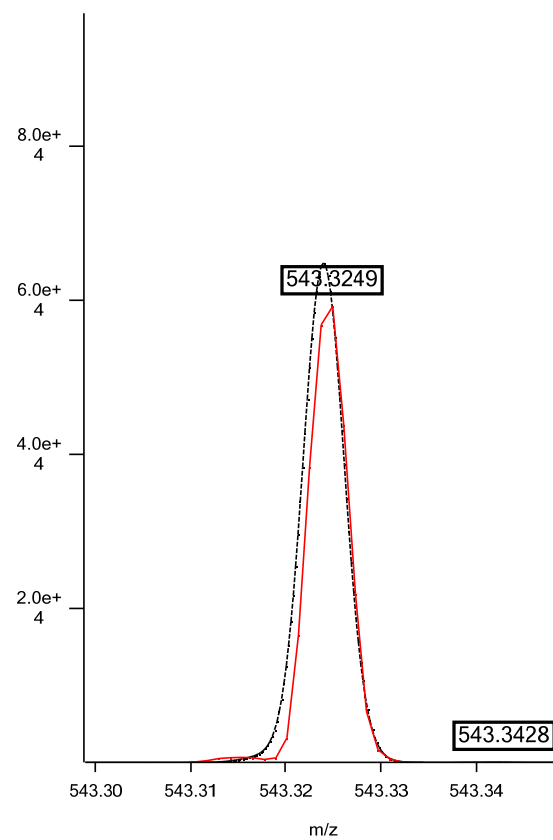

### Isotope 3

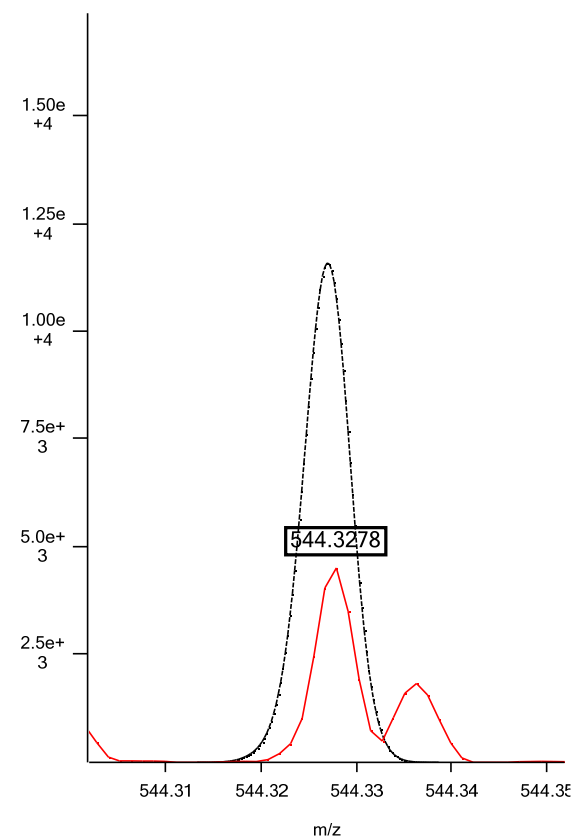

Positive ESI: LPC 20:4; C<sub>28</sub>H<sub>51</sub>NO<sub>7</sub>P; theoretical  $m/z$  544.3403, (M+H)<sup>+</sup>; isotopic fit 0.0006

### Isotope 1

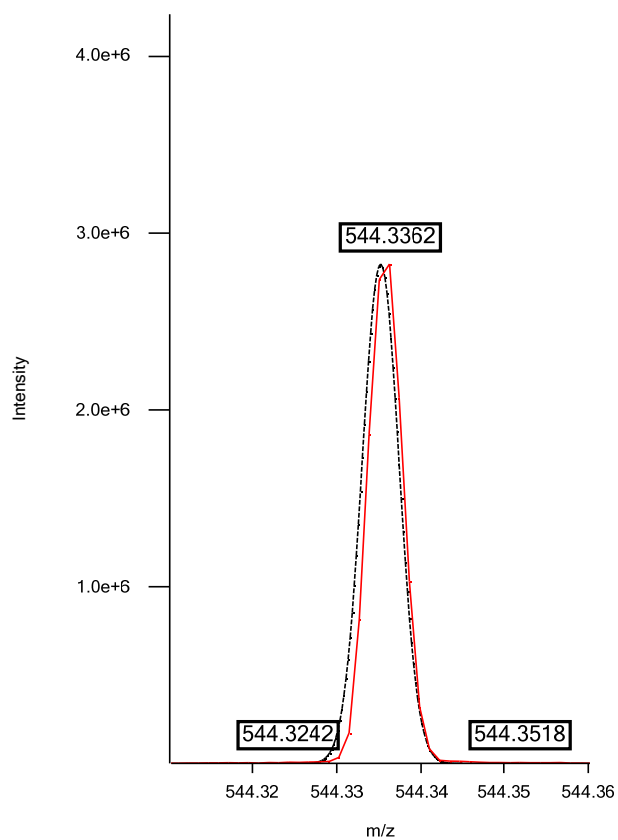

### Isotope 2

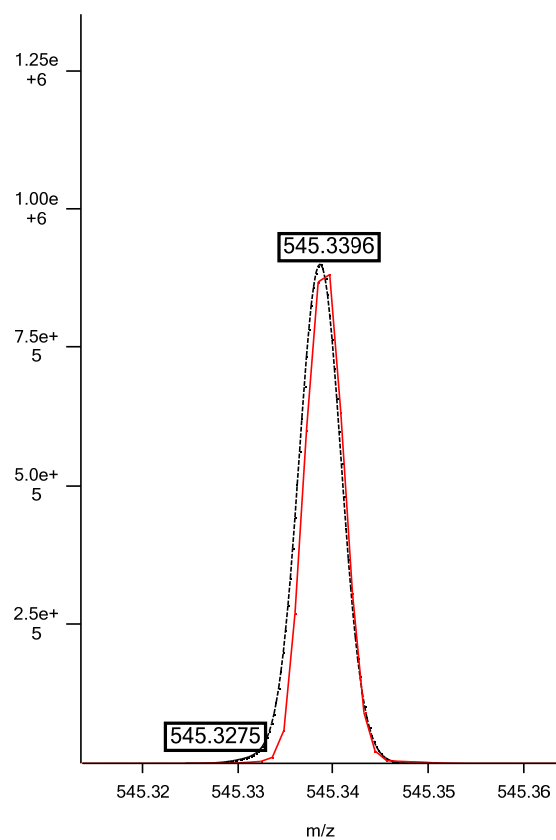

### Isotope 3

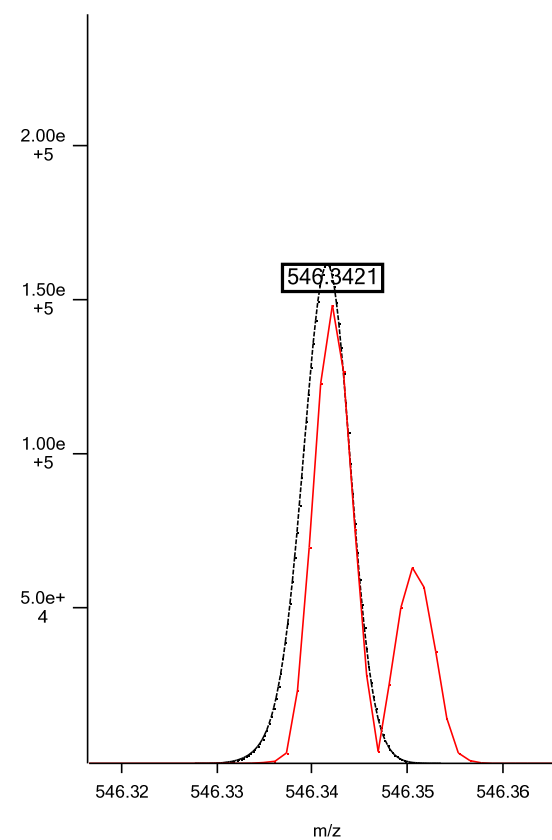

Positive ESI: LPC 20:3; C<sub>28</sub>H<sub>53</sub>NO<sub>7</sub>P; theoretical *m/z* 546.3559, (M+H)<sup>+</sup>; isotopic fit 0.0038

### Isotope 1

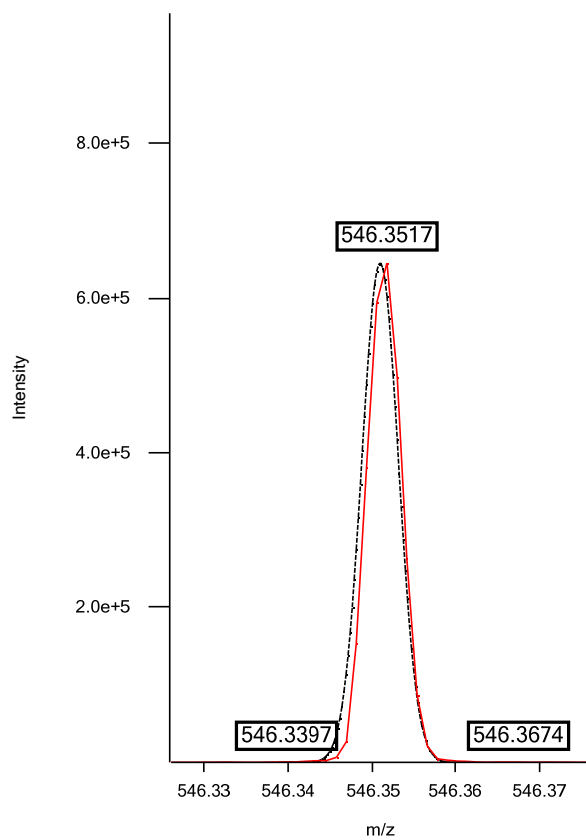

### Isotope 2

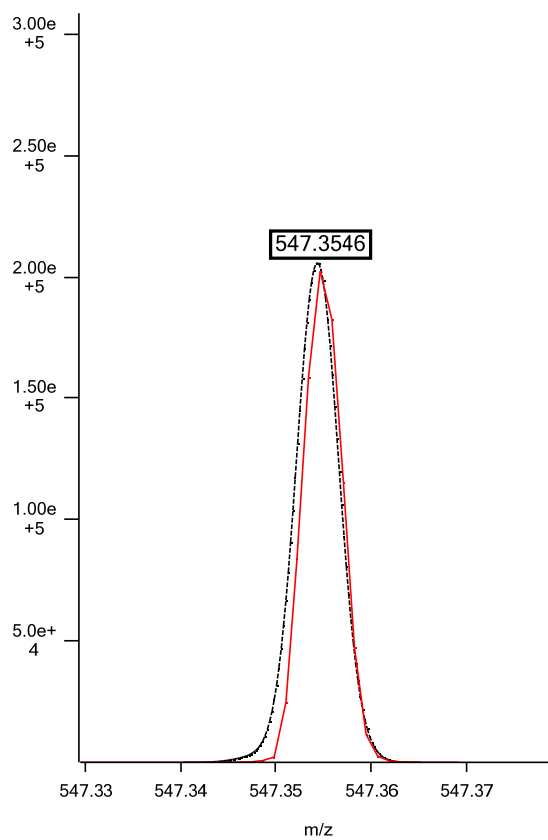

### Isotope 3

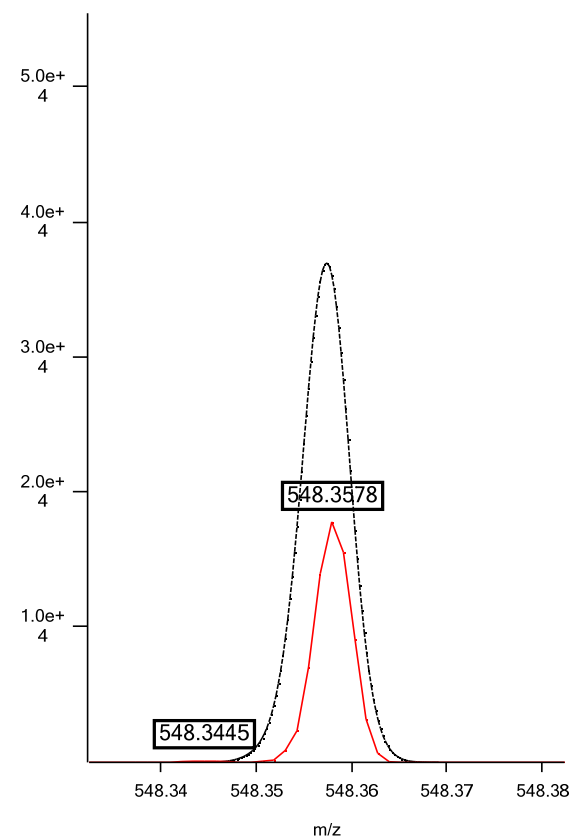

Positive ESI: LPC 20:0; C<sub>28</sub>H<sub>59</sub>NO<sub>7</sub>P; theoretical  $m/z$  552.4029, (M+H)<sup>+</sup>; isotopic fit 0.0211

### Isotope 1

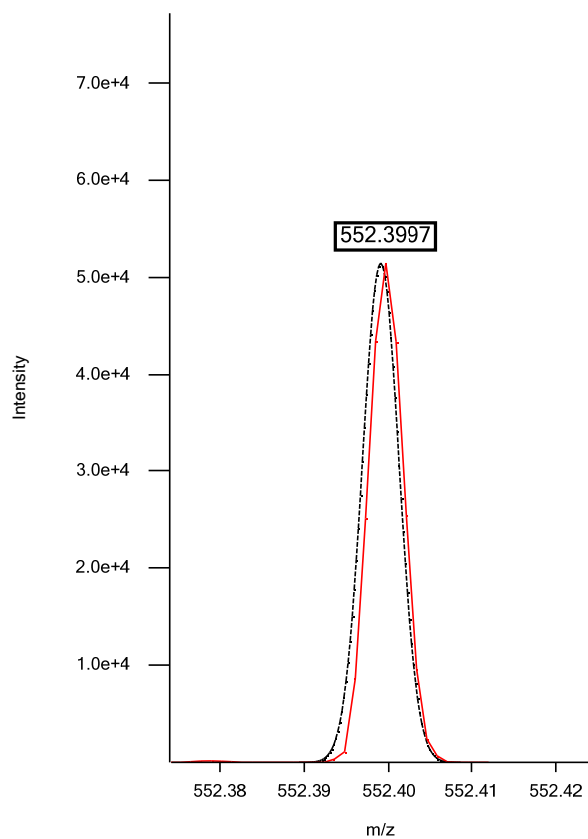

### Isotope 2

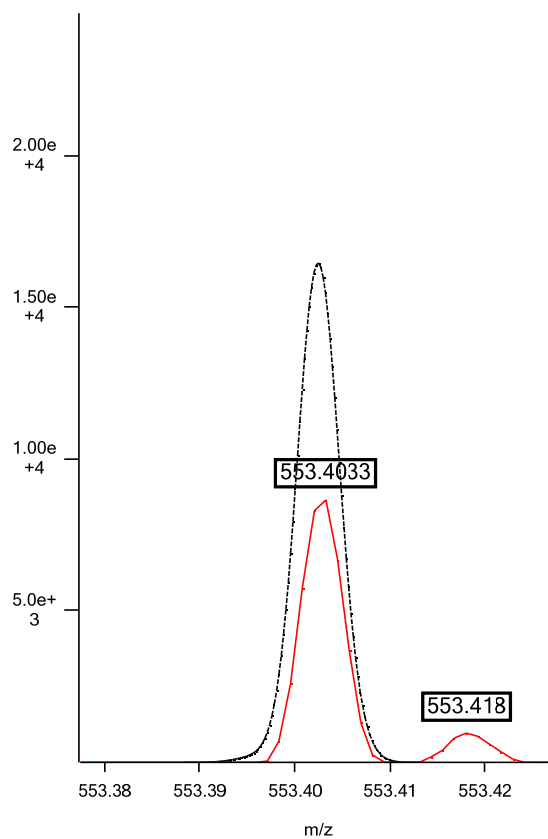

### Isotope 3

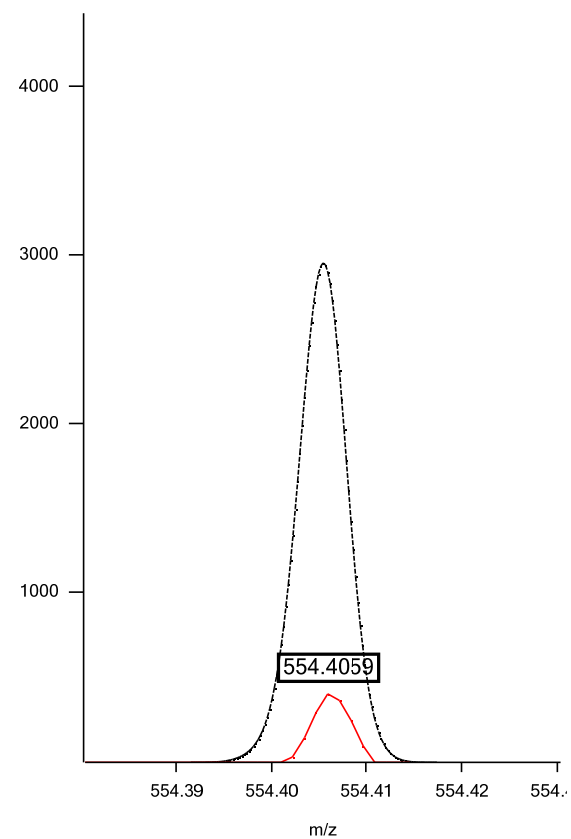

Positive ESI: LPC 22:6; C<sub>30</sub>H<sub>51</sub>NO<sub>7</sub>P; theoretical  $m/z$  568.3403, (M+H)<sup>+</sup>; isotopic fit 0.0089

### Isotope 1

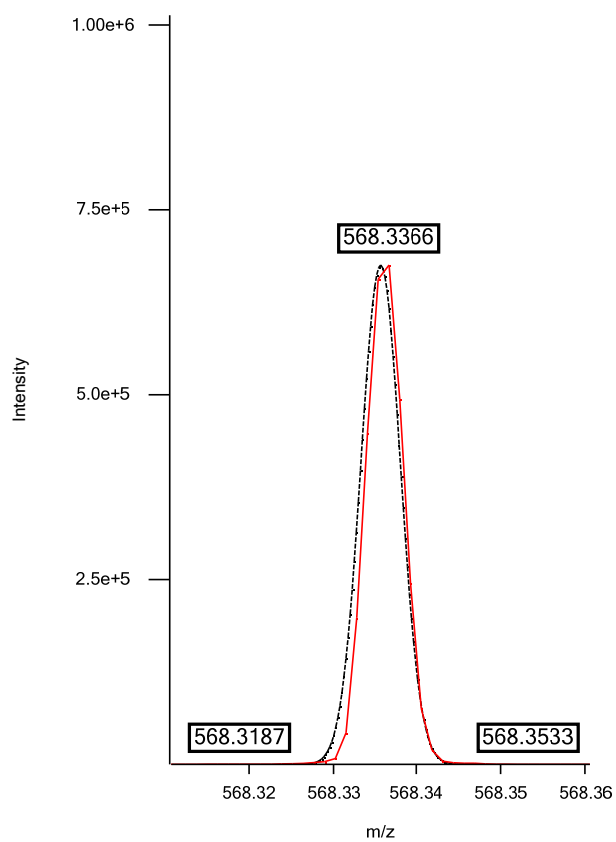

### Isotope 2

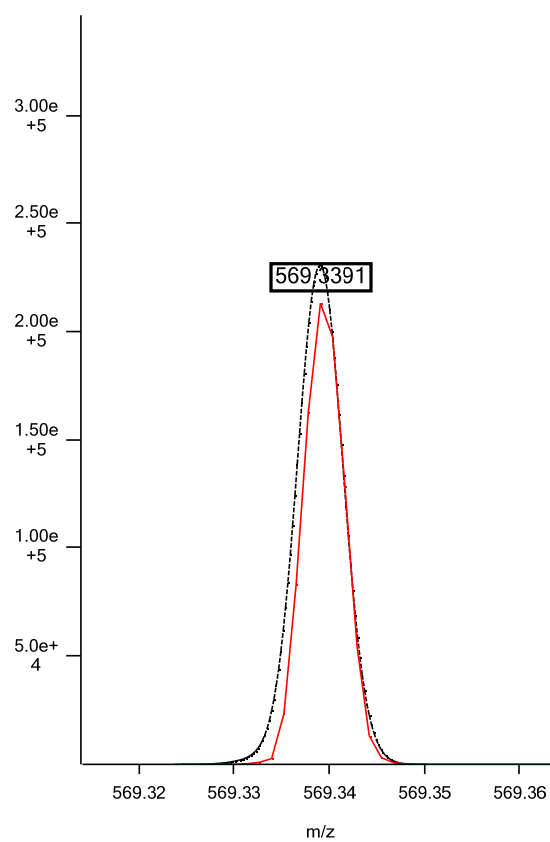

### Isotope 3

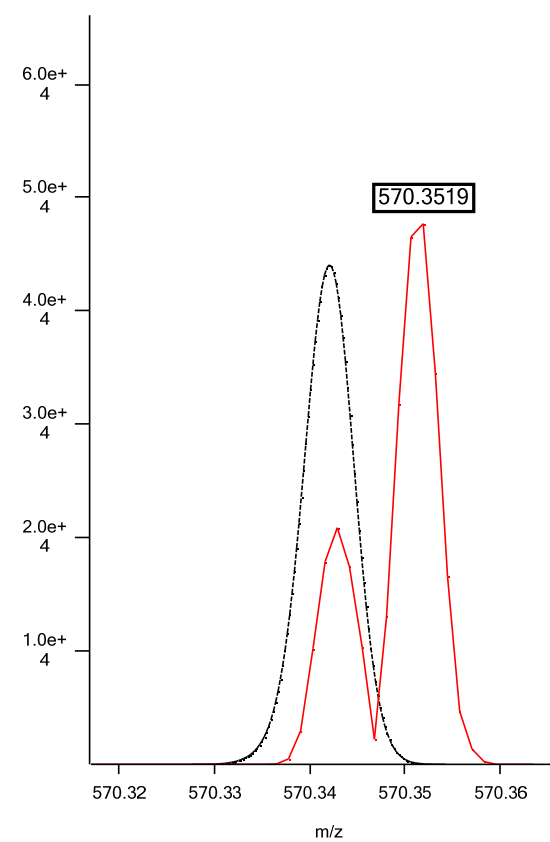

Positive ESI: LPC 22:5; C<sub>30</sub>H<sub>53</sub>NO<sub>7</sub>P; theoretical  $m/z$  570.3560, (M+H)<sup>+</sup>; isotopic fit 0.0200

### Isotope 1

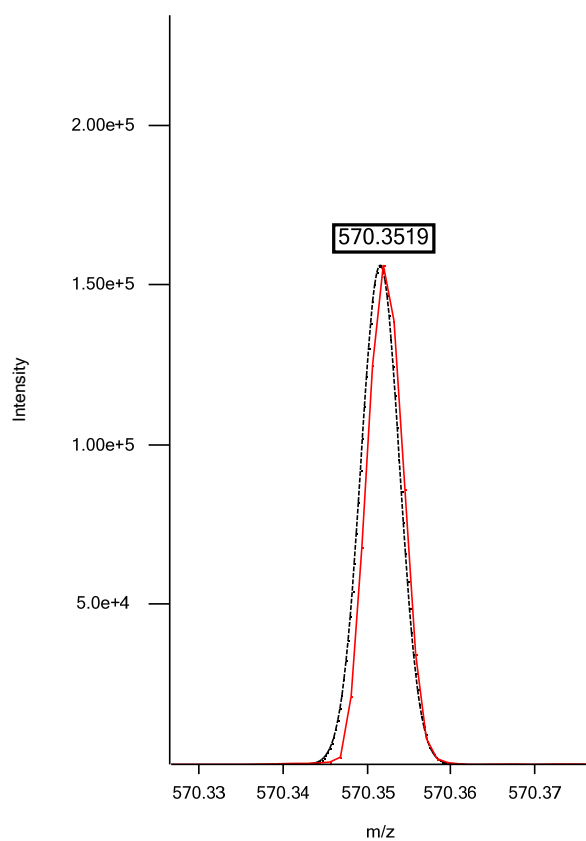

### Isotope 2

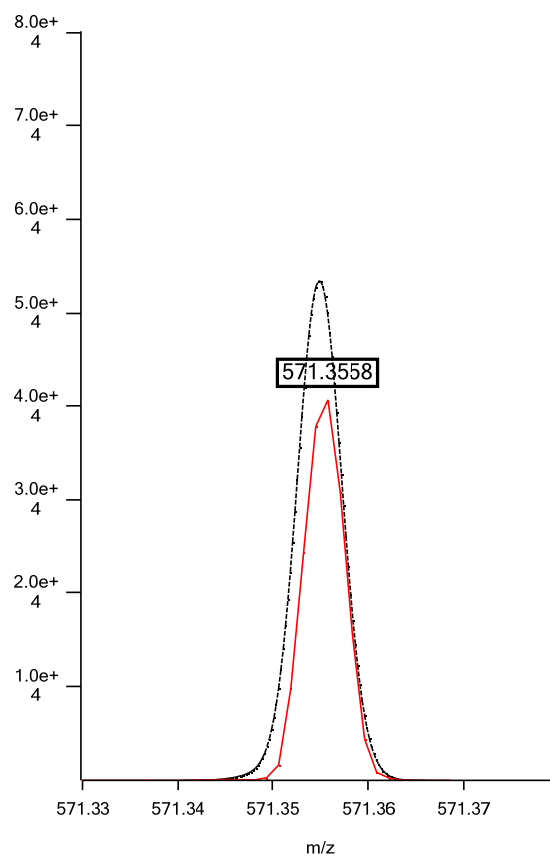

### Isotope 3

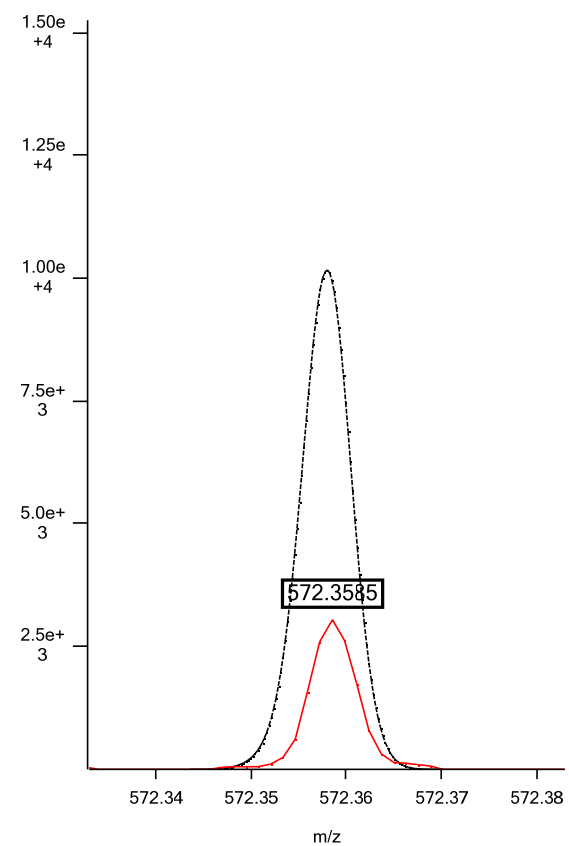

Positive ESI: Oxidized PC 17:1/Keto-5:0;  $C_{30}H_{57}NO_9P$ ; theoretical  $m/z$  606.3771, (M+H)<sup>+</sup>; isotopic fit 0.0050

### Isotope 1

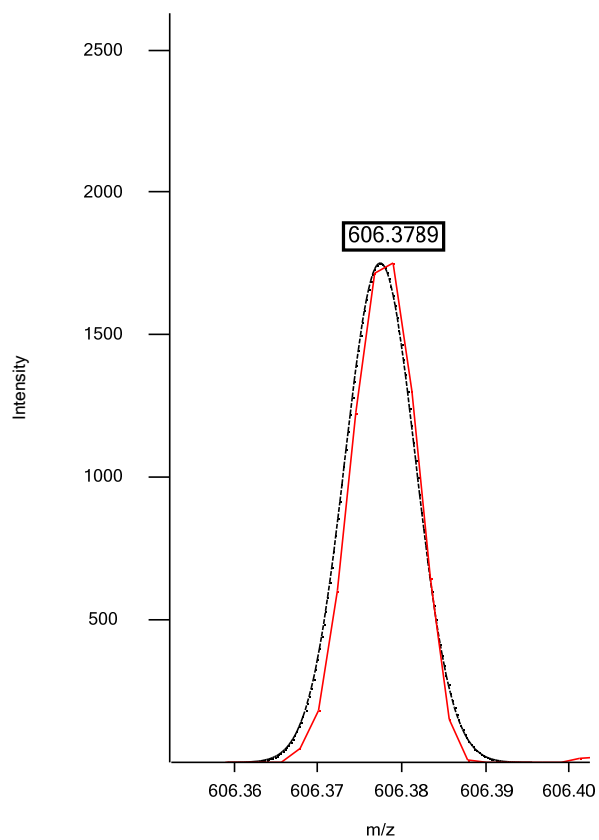

### Isotope 2

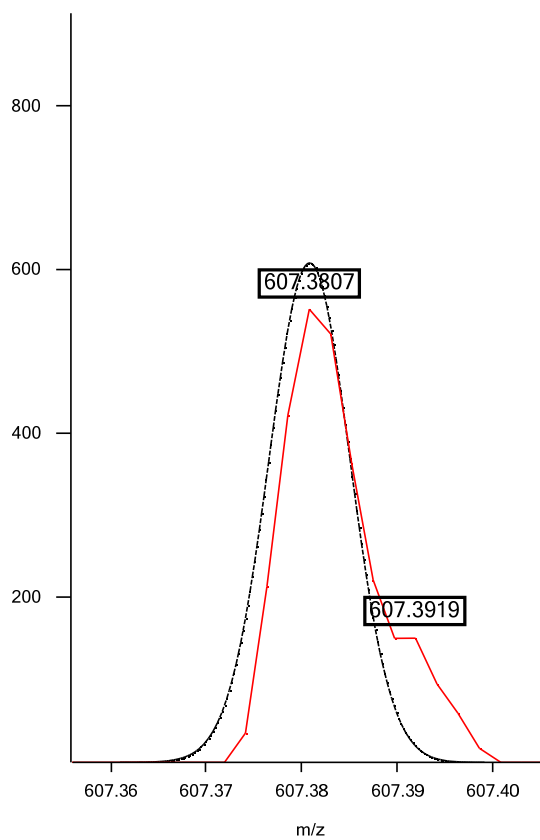

### Isotope 3

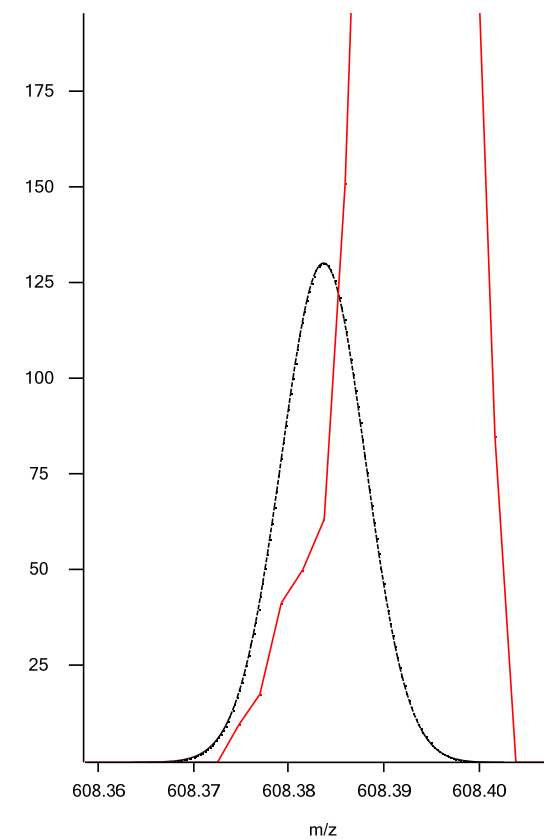



Positive ESI: Oxidized PC 17:0/Keto-5:0;  $C_{30}H_{59}NO_9P$ ; theoretical  $m/z$  608.3927, (M+H)<sup>+</sup>; isotopic fit 0.0249

### Isotope 1

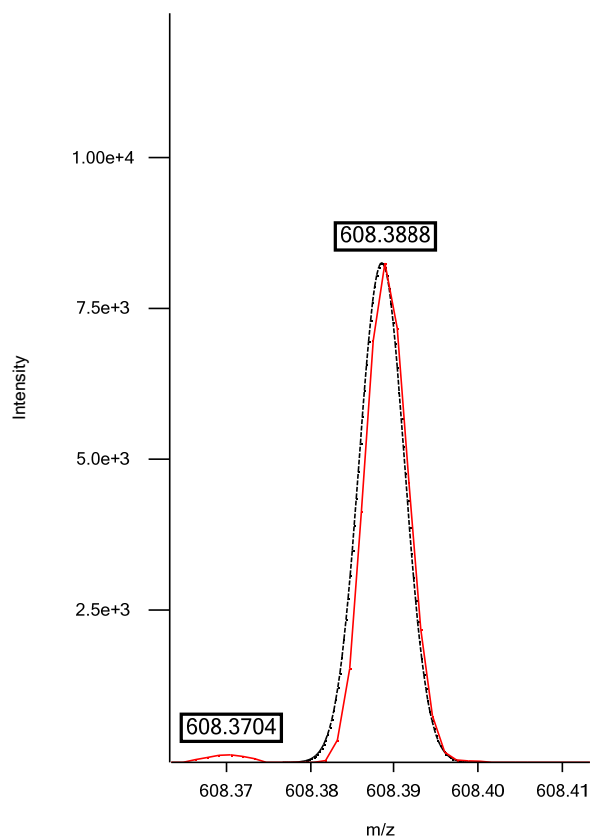

### Isotope 2

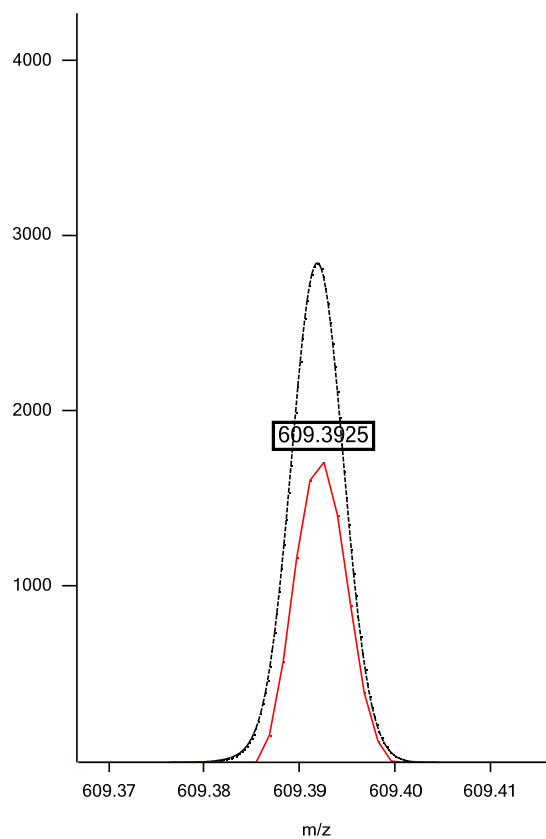

### Isotope 3

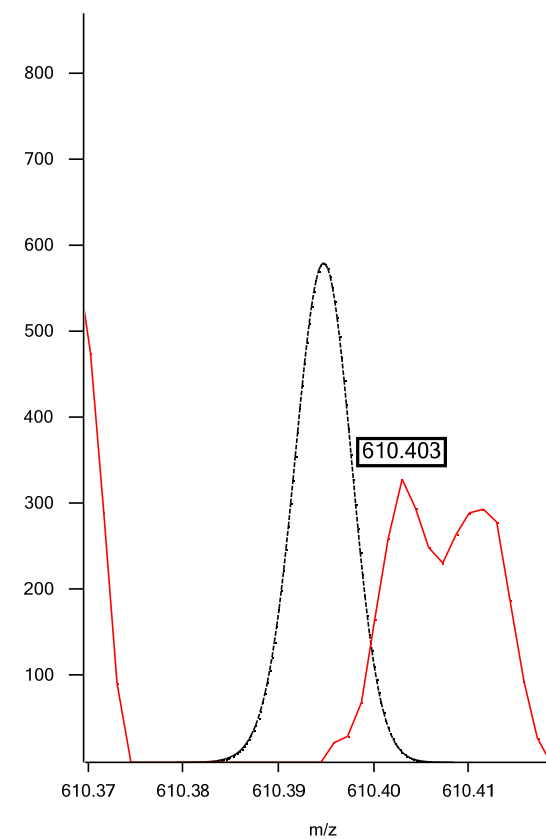

Positive ESI: Oxidized PC 18:1/Keto-5:0;  $C_{31}H_{59}NO_9P$ ; theoretical  $m/z$  620.3927, (M+H)<sup>+</sup>; isotopic fit 0.0045

### Isotope 1

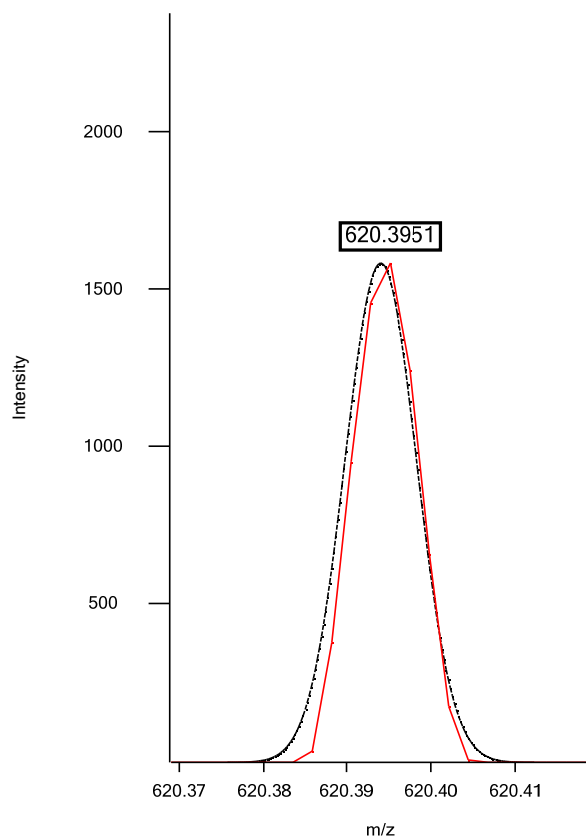

### Isotope 2

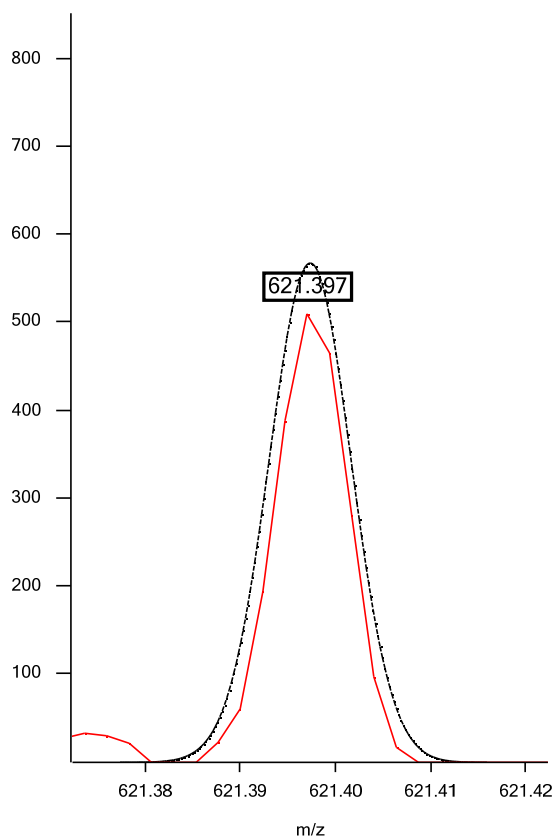

### Isotope 3

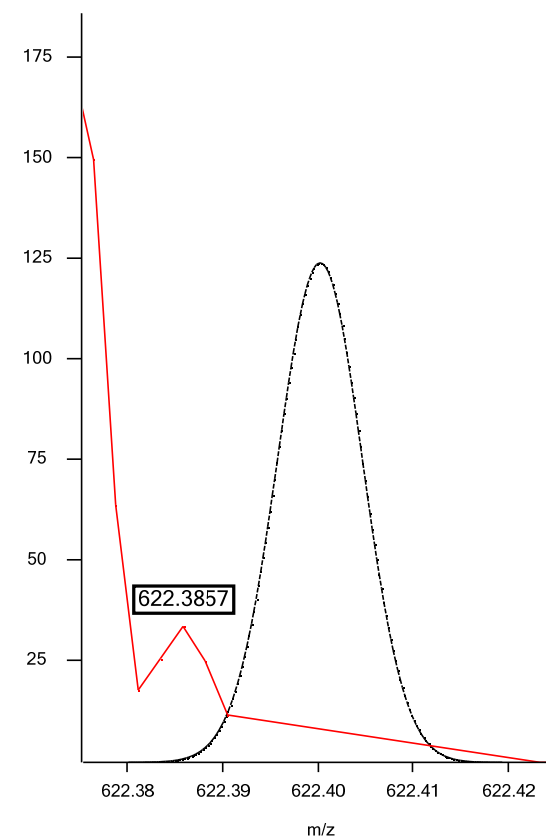

Positive ESI: Oxidized PC 18:0/Keto-5:0;  $C_{31}H_{61}NO_9P$ ; theoretical  $m/z$  622.4084, (M+H)<sup>+</sup>; isotopic fit 0.0263

### Isotope 1

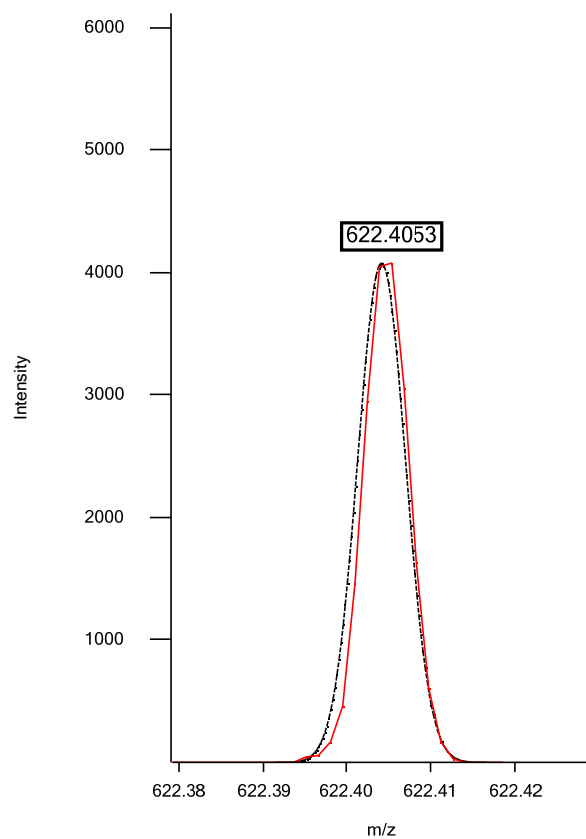

### Isotope 2

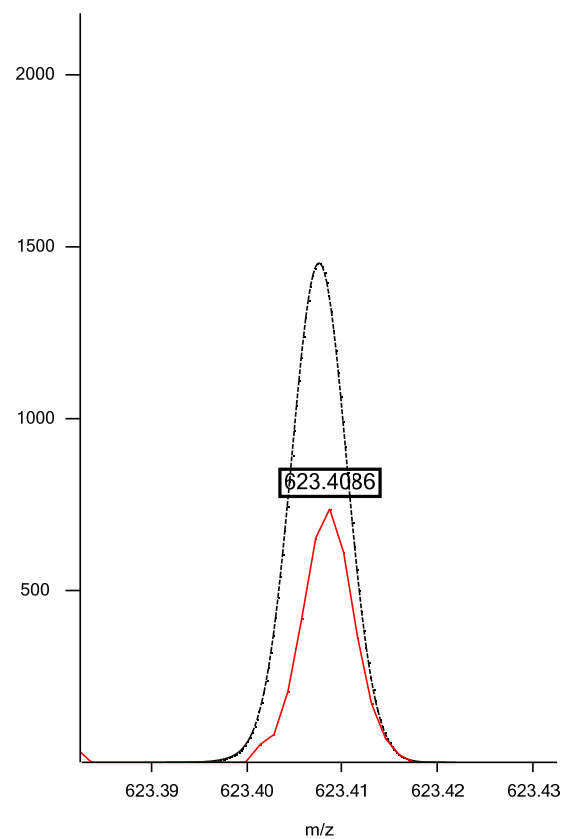

### Isotope 3

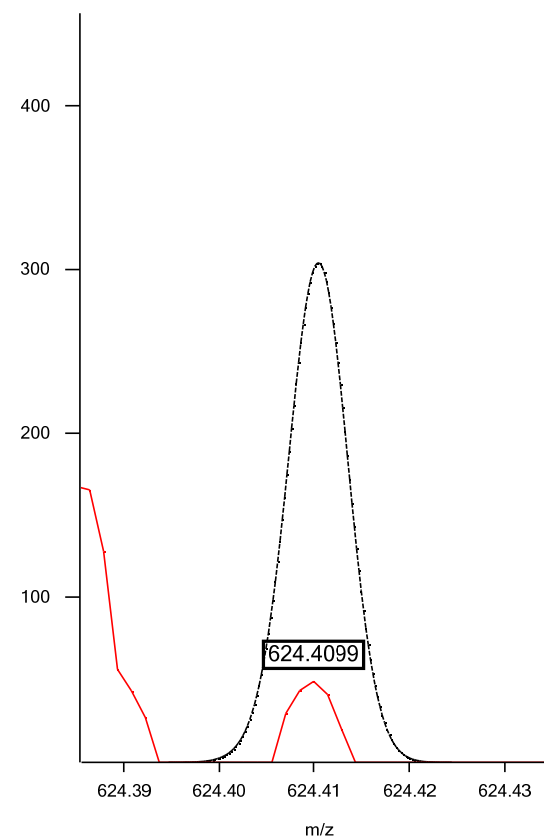

Negative ESI: Oxidized PC 16:0/Hydroperoxy-5:0;  $C_{31}H_{61}NO_{12}P$ ; theoretical  $m/z$  670.3931,  $(M-H)^-$ ; isotopic fit 0.0059

### Isotope 1

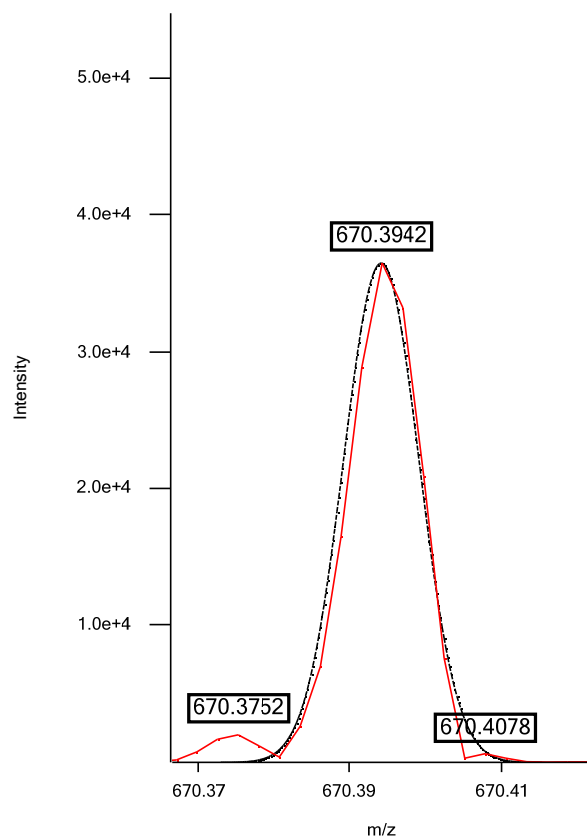

### Isotope 2

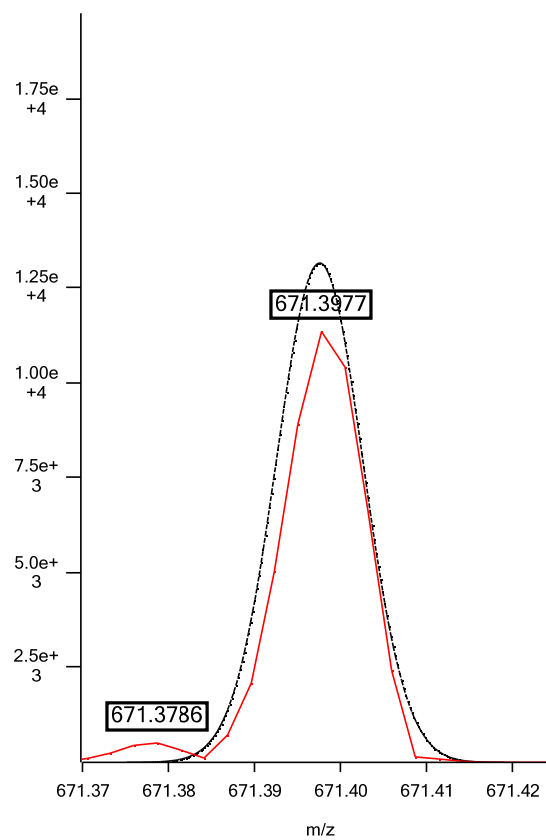

### Isotope 3

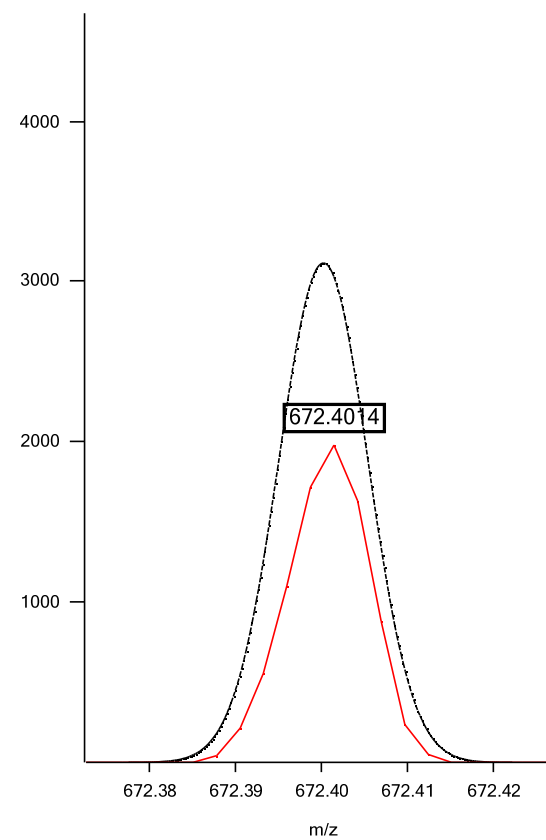

Negative ESI: Oxidized PC 16:0/Hydroxy-7:2e;  $C_{33}H_{63}NO_{10}P$ ; theoretical  $m/z$  664.4189, (M-H)<sup>-</sup>; isotopic fit 0.0035

### Isotope 1

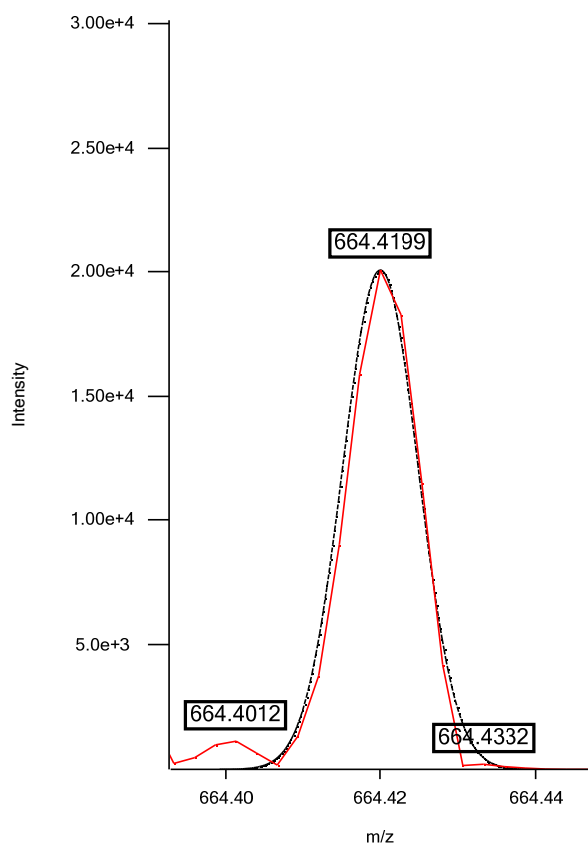

### Isotope 2

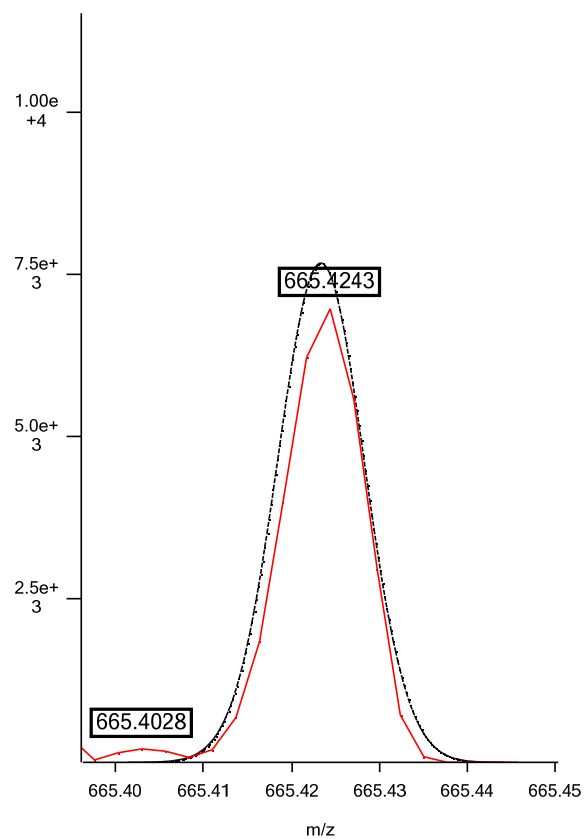

### Isotope 3

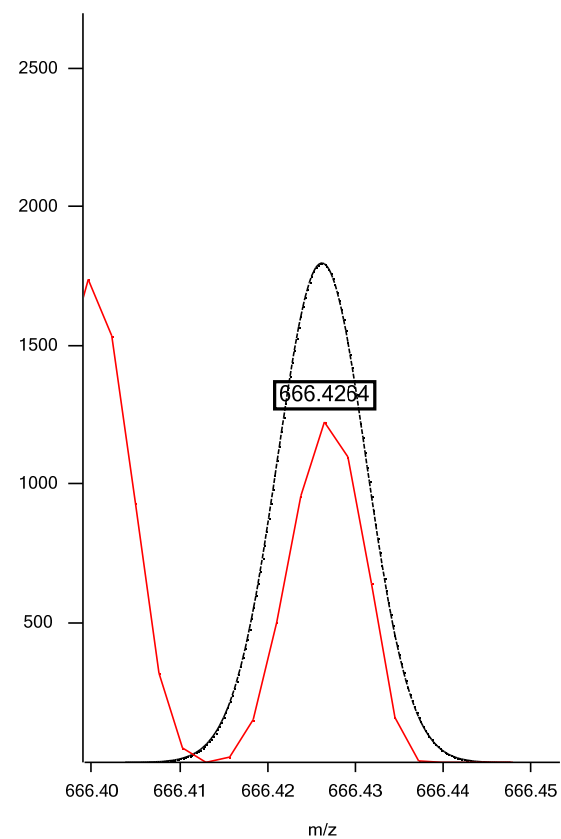

Positive ESI: Oxidized PC 18:0/Carboxy-7:0;  $C_{33}H_{65}NO_{10}P$ ; theoretical  $m/z$  666.4346,  $(M+H)^+$ ; isotopic fit 0.0211

### Isotope 1

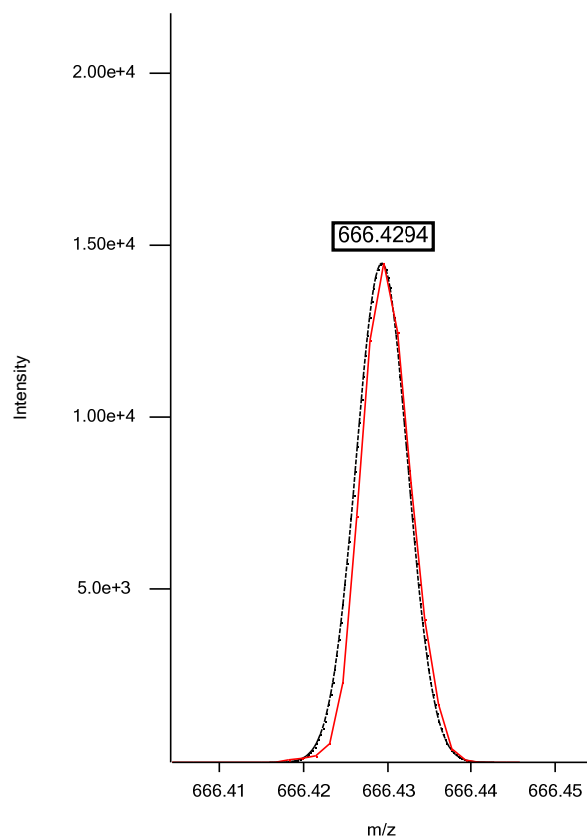

### Isotope 2

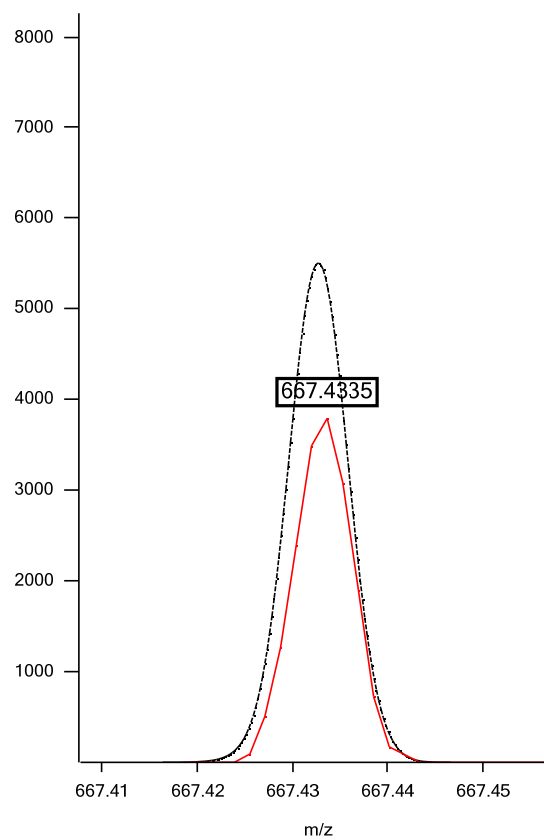

### Isotope 3

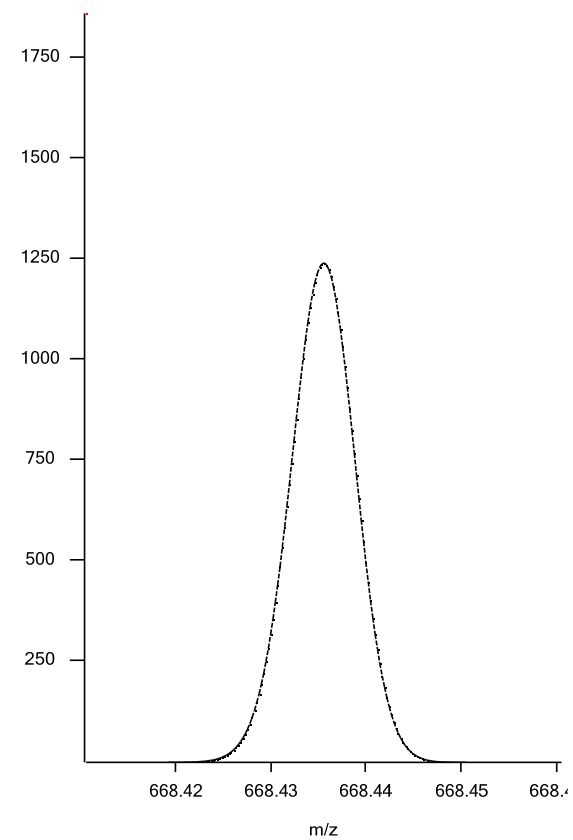

Positive ESI: Oxidized PC 18:0/Keto-7:0;  $C_{33}H_{65}NO_9P$ ; theoretical  $m/z$  650.4397,  $(M+H)^+$ ; isotopic fit 0.0080

### Isotope 1

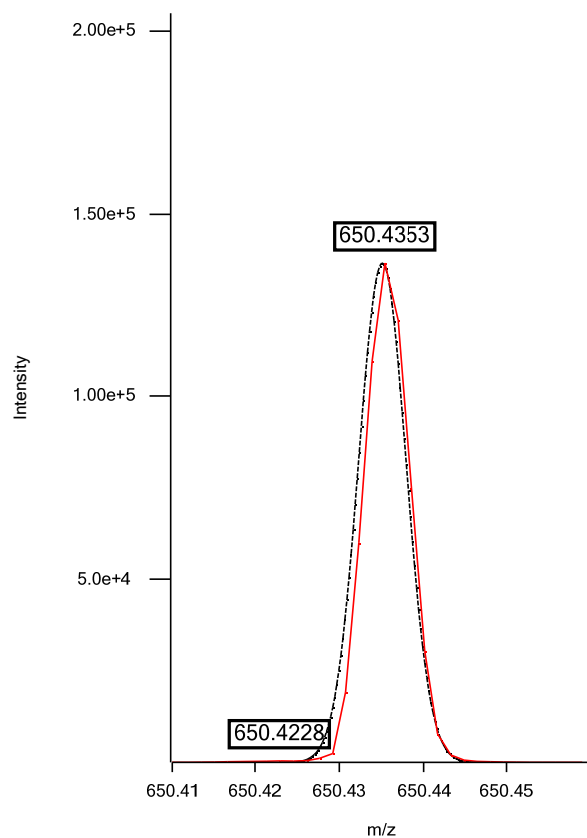

### Isotope 2

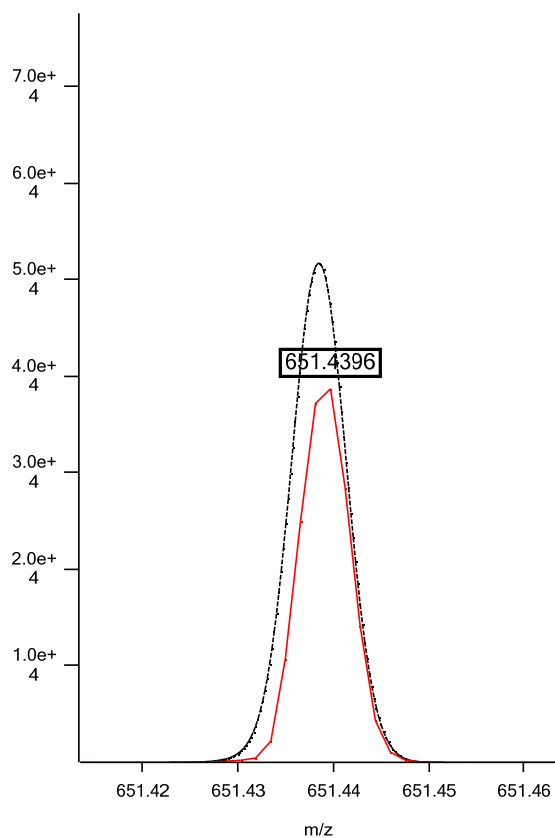

### Isotope 3

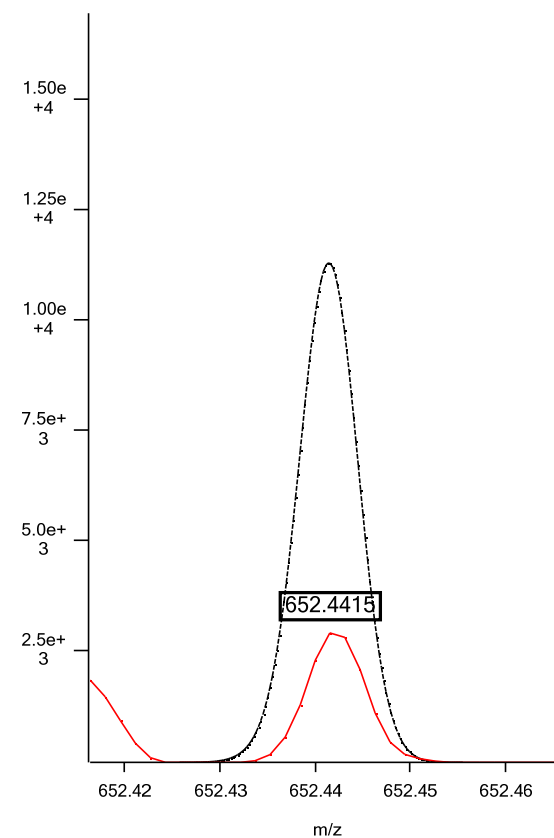

Negative ESI: Oxidized PC 18:0/Hydroperoxy-5:0;  $C_{33}H_{65}NO_{12}P$ ; theoretical  $m/z$  698.4244,  $(M-H)^-$ ; isotopic fit 0.0057

### Isotope 1

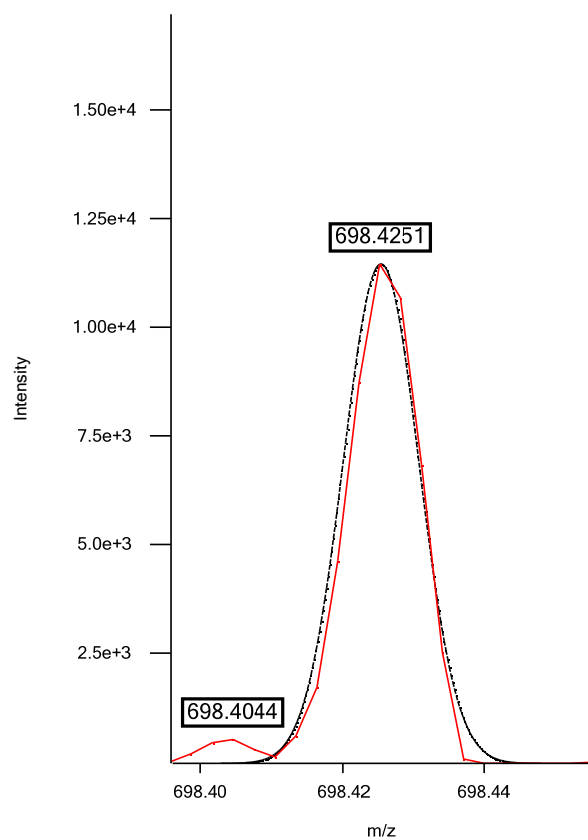

### Isotope 2

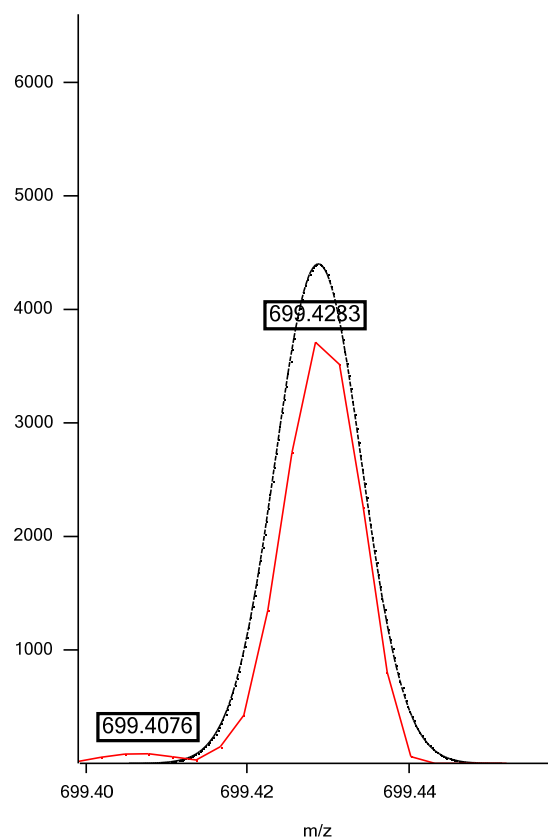

### Isotope 3

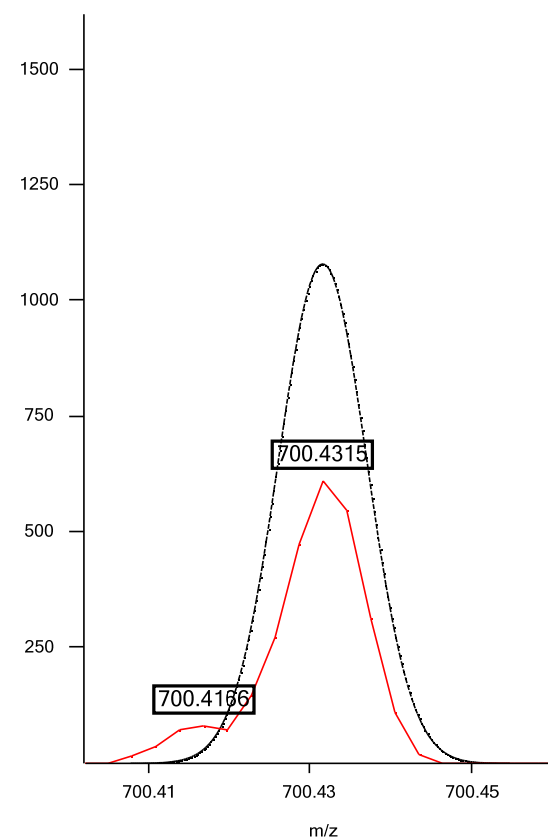



Negative ESI: Oxidized PC 18:0/Hydroperoxy-5:0e; C<sub>33</sub>H<sub>67</sub>NO<sub>11</sub>P; theoretical *m/z* 684.4452, (M-H)<sup>-</sup>; isotopic fit 0.0092

### Isotope 1

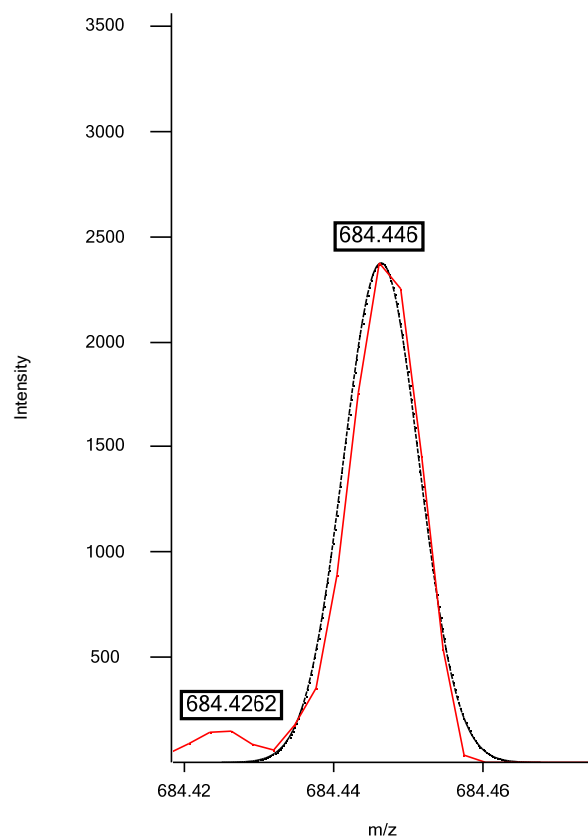

### Isotope 2

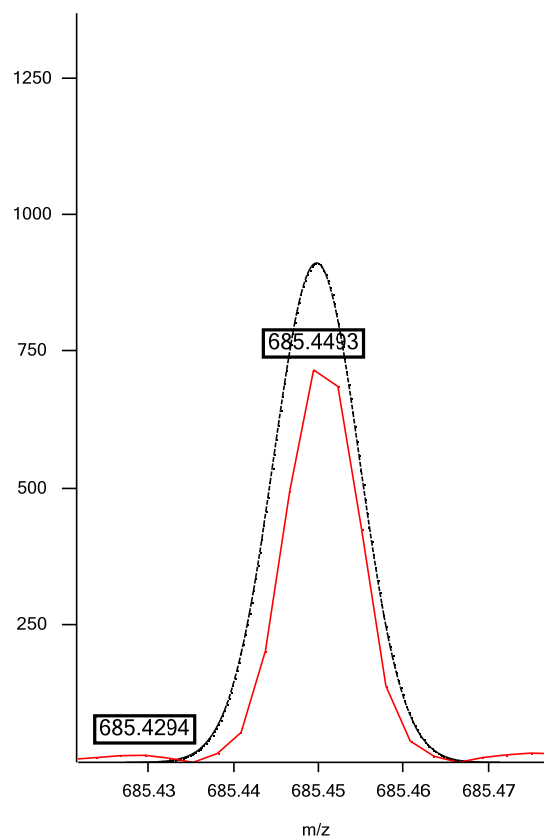

### Isotope 3

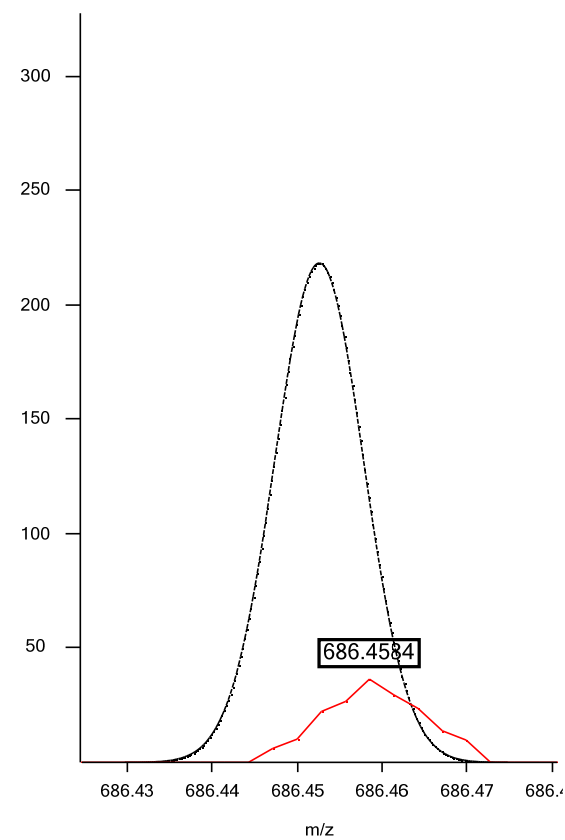

Negative ESI: Oxidized PC 18:0/Keto-6:1; C<sub>34</sub>H<sub>63</sub>NO<sub>11</sub>P; theoretical *m/z* 692.4138, (M-H)<sup>-</sup>; isotopic fit 0.0134

### Isotope 1

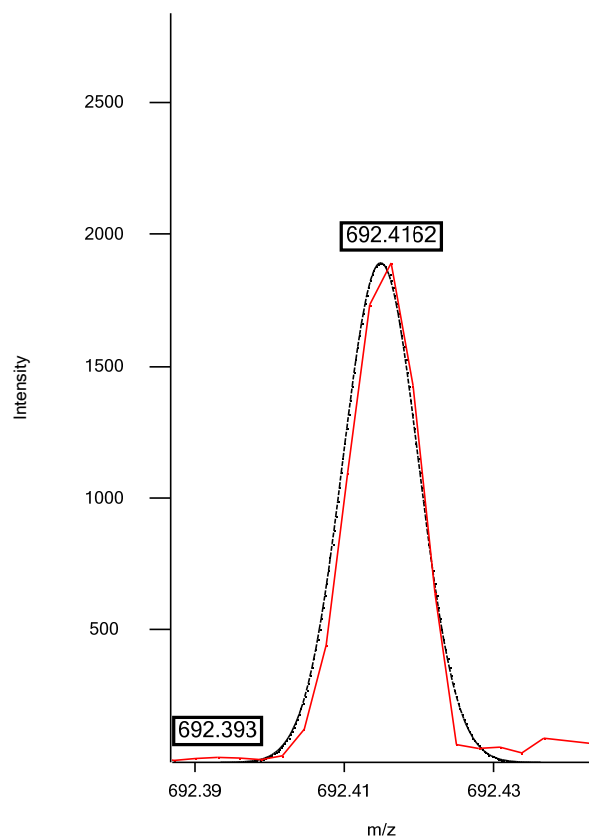

### Isotope 2

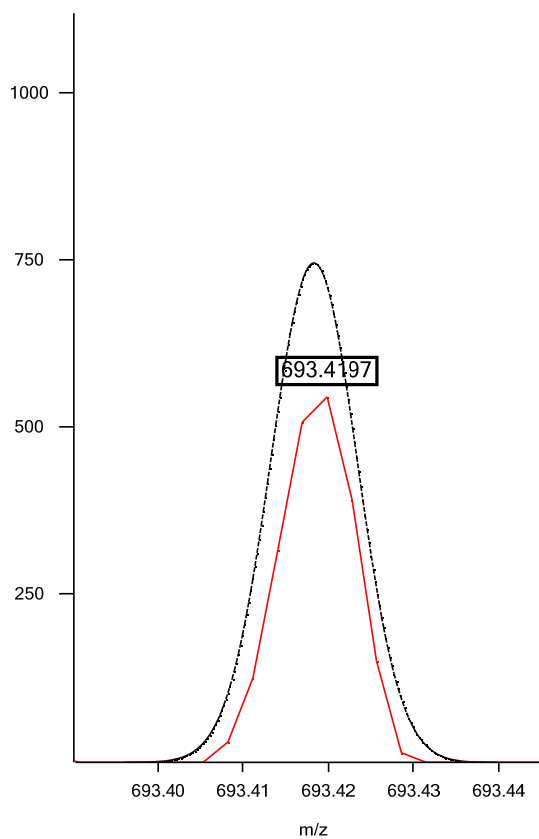

### Isotope 3

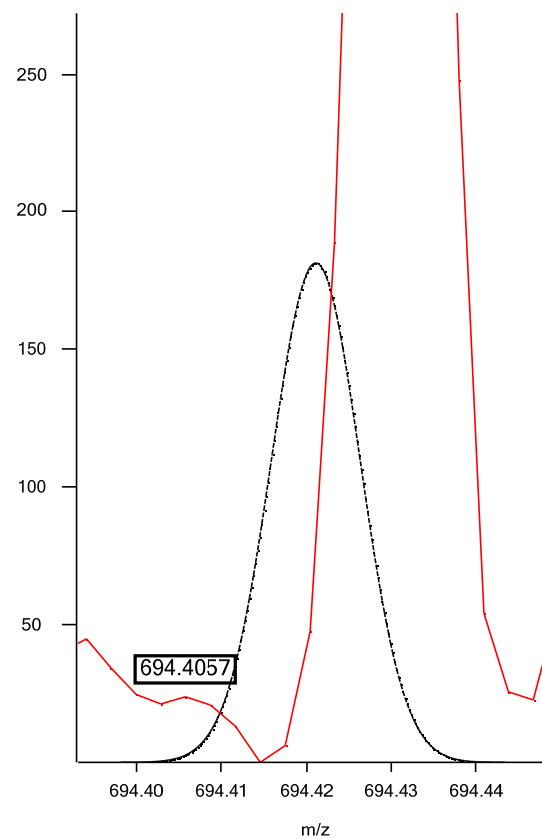

Negative ESI: Oxidized PC 18:1/Trihydroxy-6:0;  $C_{34}H_{65}NO_{13}P$ ; theoretical  $m/z$  726.4193, (M-H)<sup>-</sup>; isotopic fit 0.0041

### Isotope 1

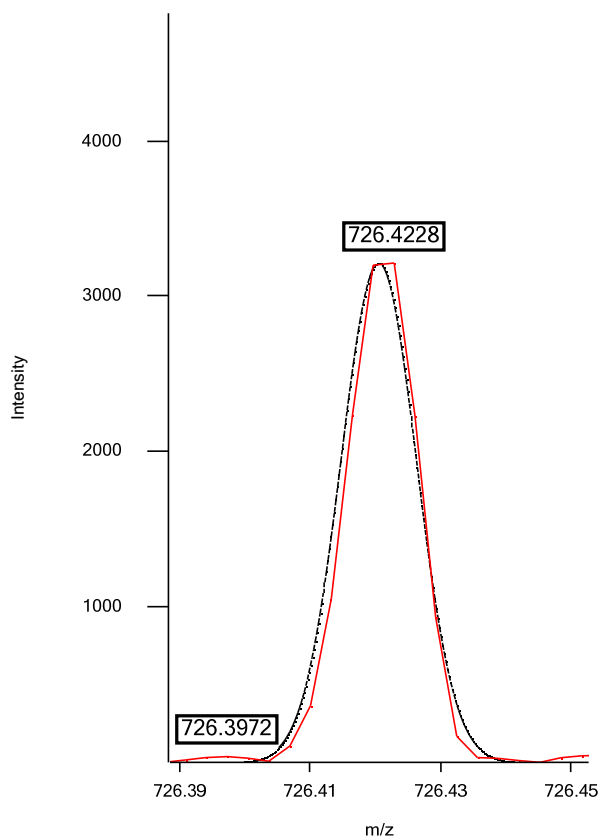

### Isotope 2

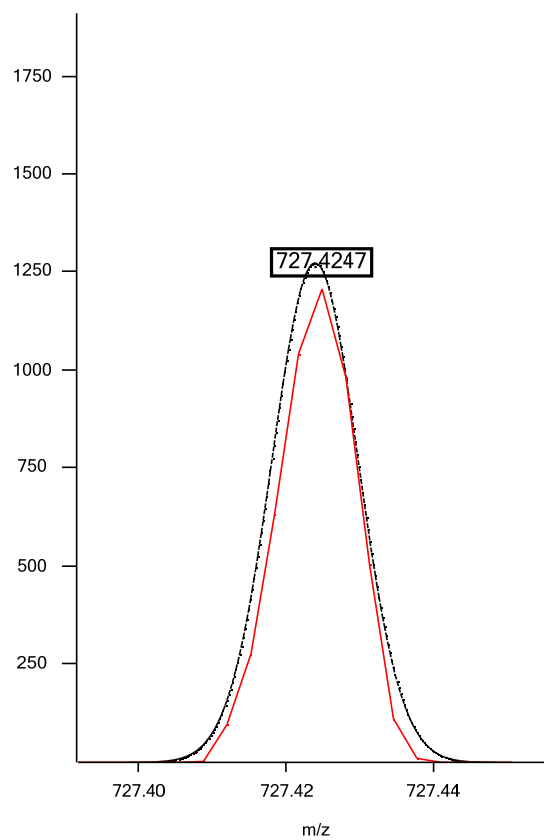

### Isotope 3

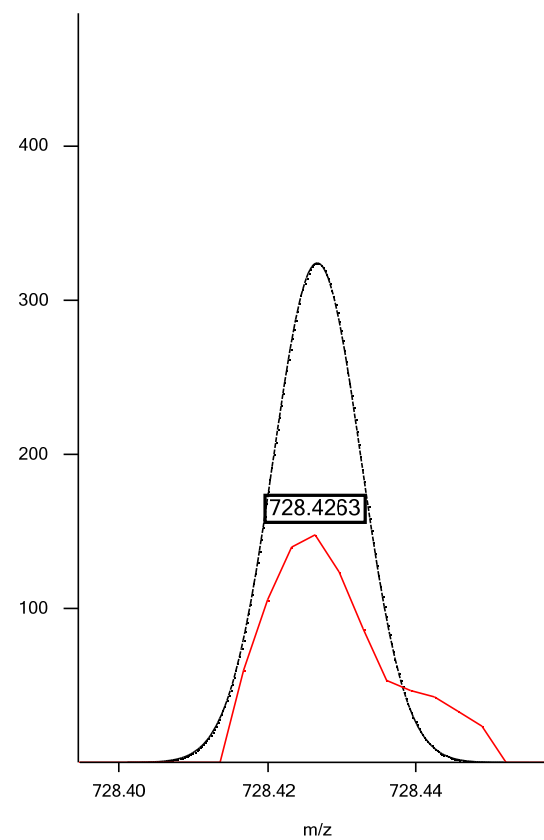

Positive ESI: Oxidized PC 19:0/Keto-7:0;  $C_{34}H_{67}NO_9P$ ; theoretical  $m/z$  664.4553,  $(M+H)^+$ ; isotopic fit 0.0150

### Isotope 1

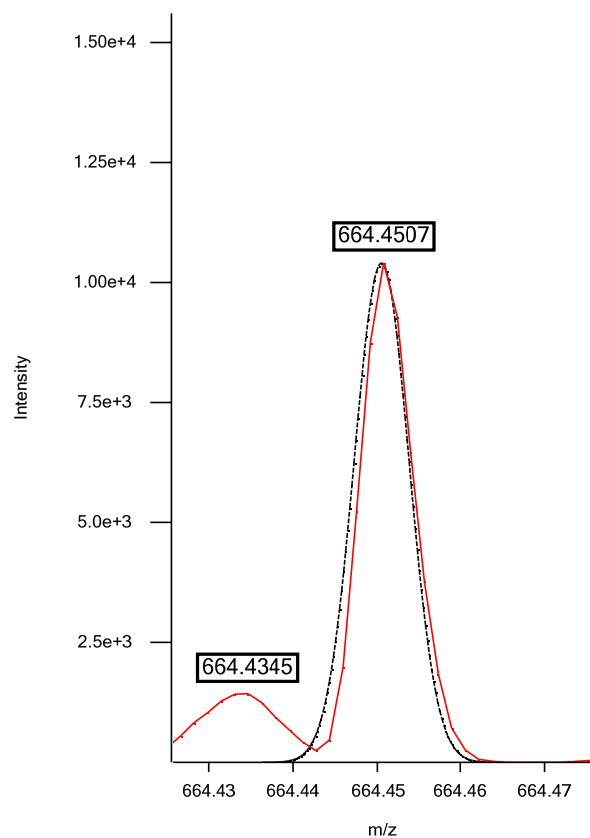

### Isotope 2

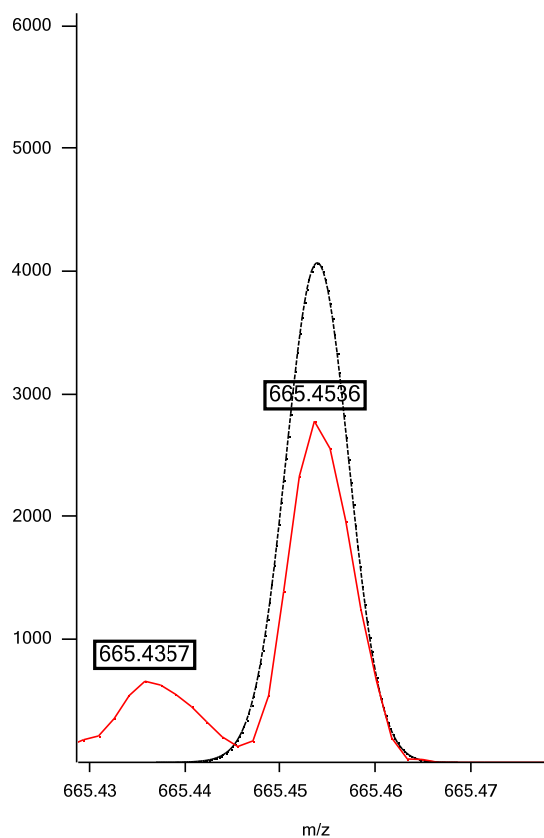

### Isotope 3

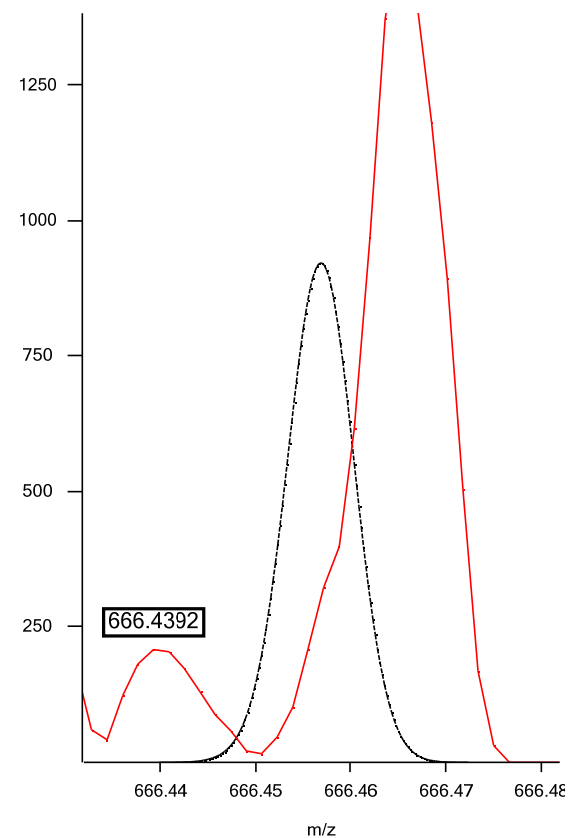

Positive ESI: Oxidized PC 20:0/Keto-7:0;  $C_{35}H_{69}NO_9P$ ; theoretical  $m/z$  678.4710, (M+H)<sup>+</sup>; isotopic fit 0.0269

### Isotope 1

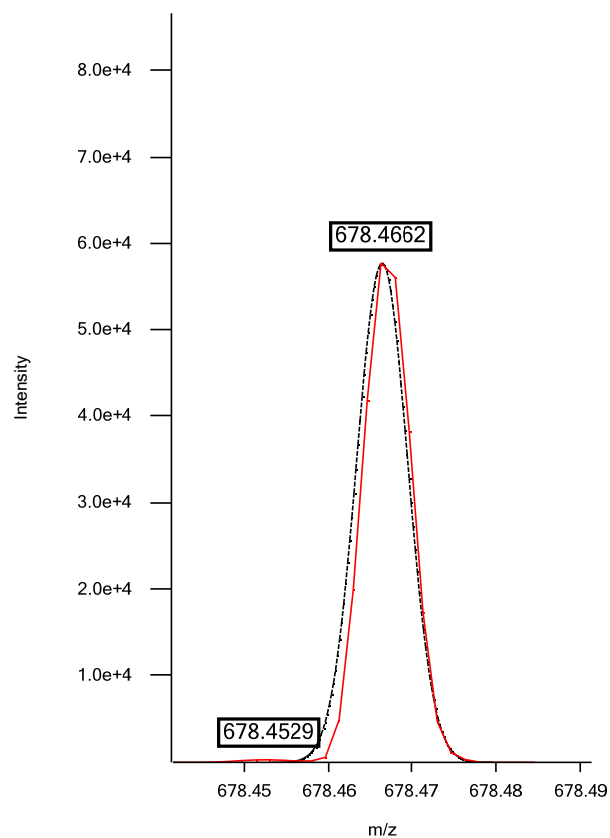

### Isotope 2

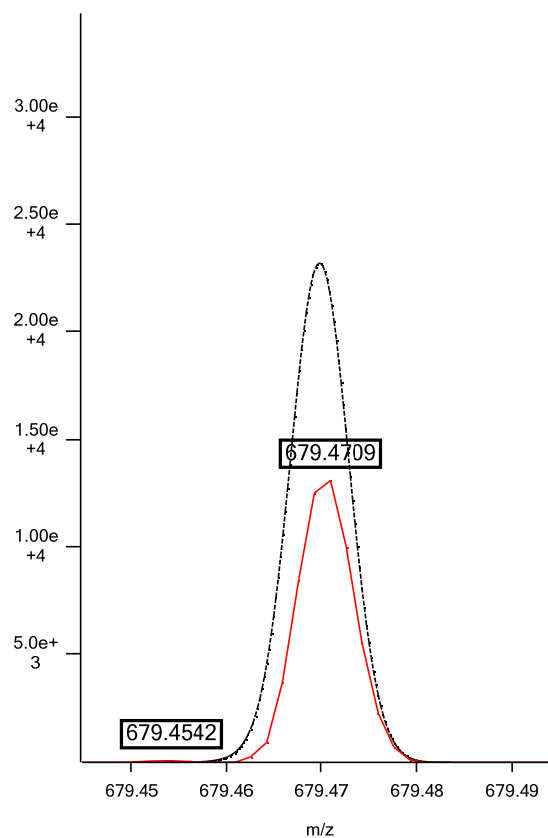

### Isotope 3

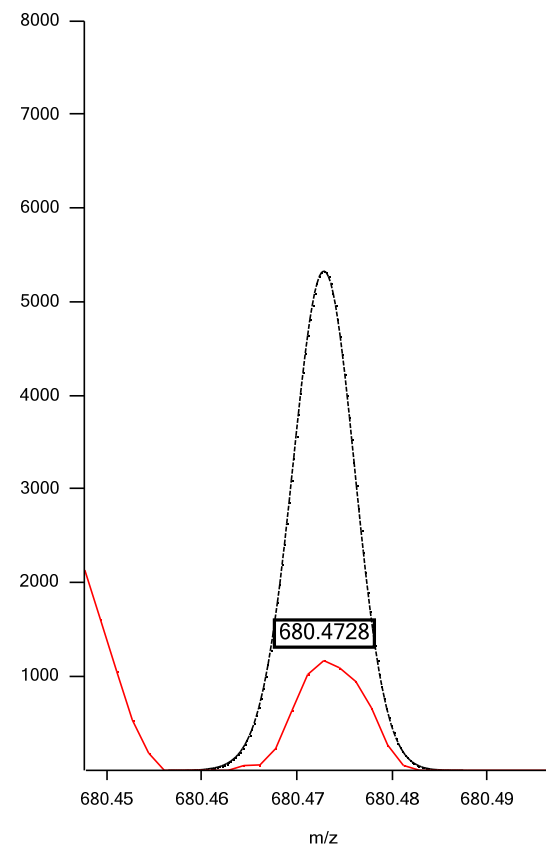

Positive ESI: Oxidized PC 21:1/Keto-7:0; C<sub>36</sub>H<sub>69</sub>NO<sub>9</sub>P; theoretical *m/z* 690.4710, (M+H)<sup>+</sup>; isotopic fit 0.0372

### Isotope 1

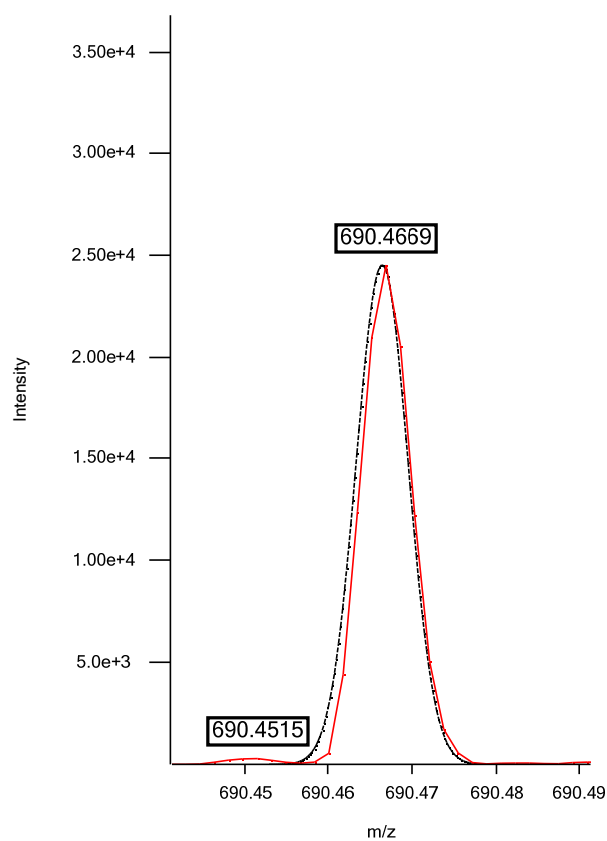

### Isotope 2

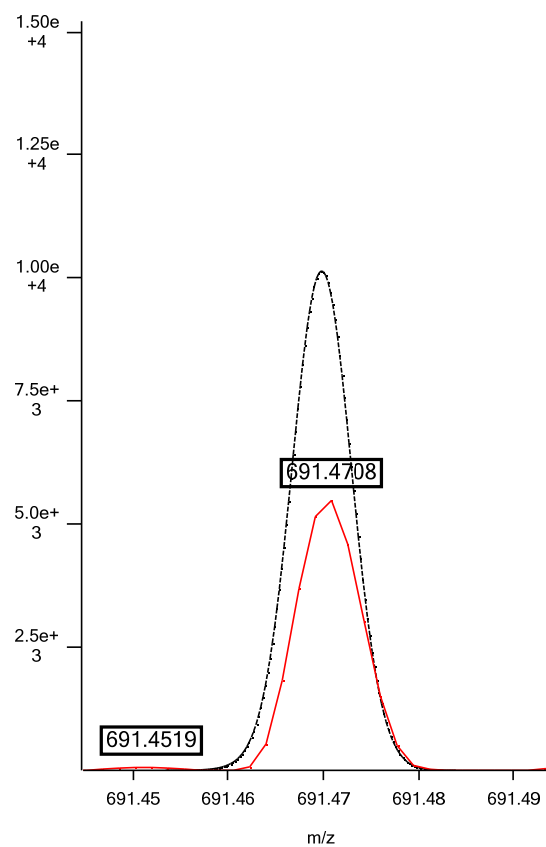

### Isotope 3

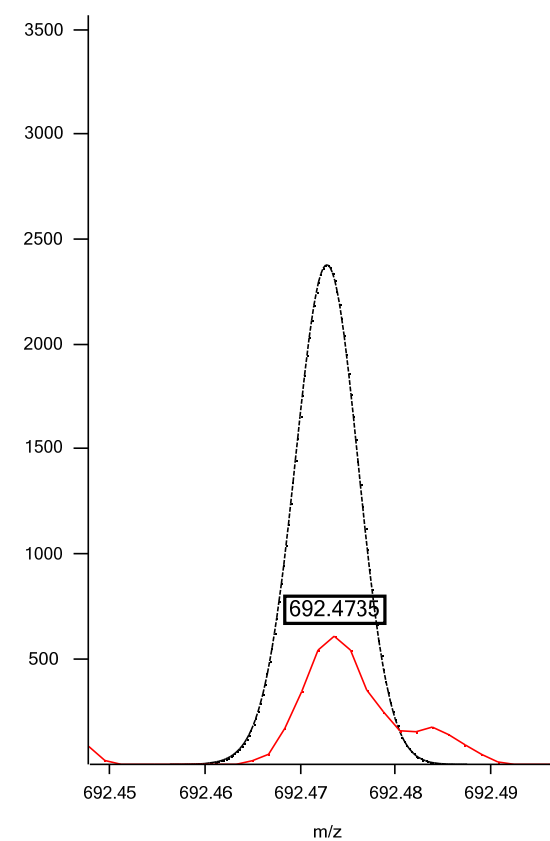

Negative ESI: Oxidized PC 18:2/Trihydroxy-9:0;  $C_{37}H_{69}NO_{13}P$ ; theoretical  $m/z$  766.4506, (M-H)<sup>-</sup>; isotopic fit 0.0372

### Isotope 1

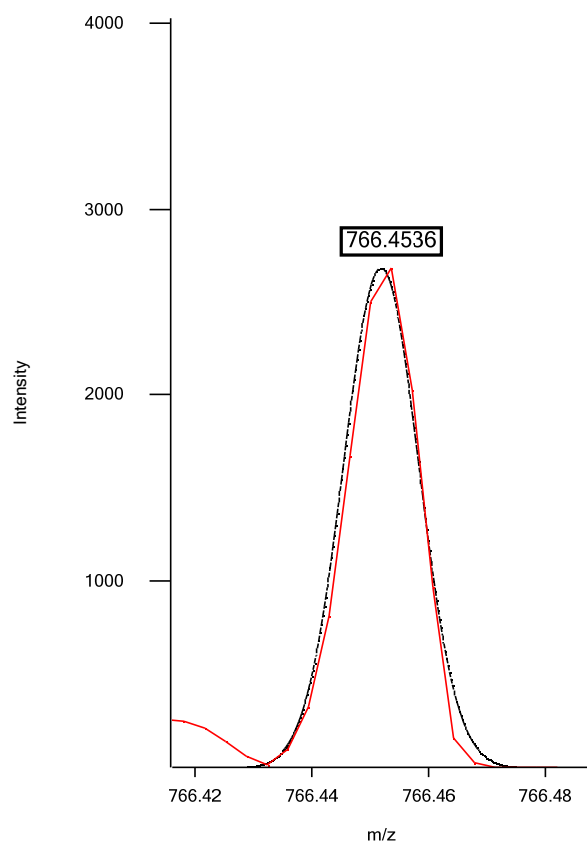

### Isotope 2

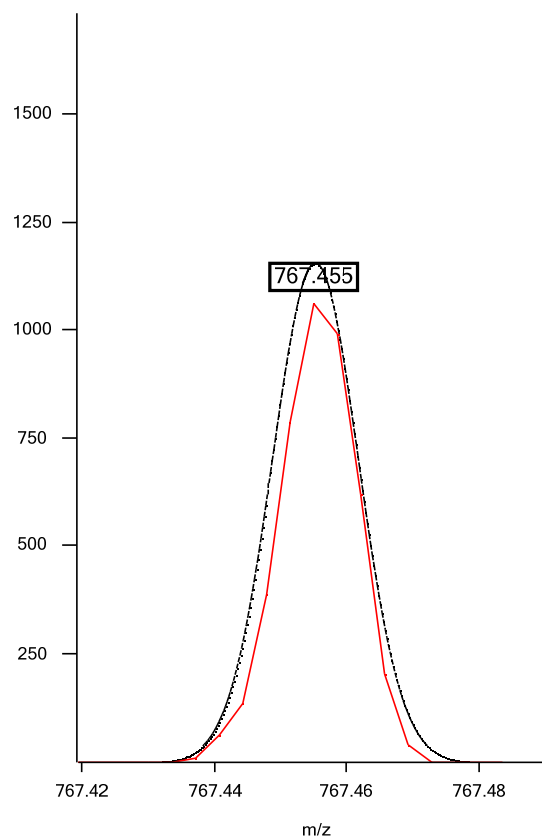

### Isotope 3

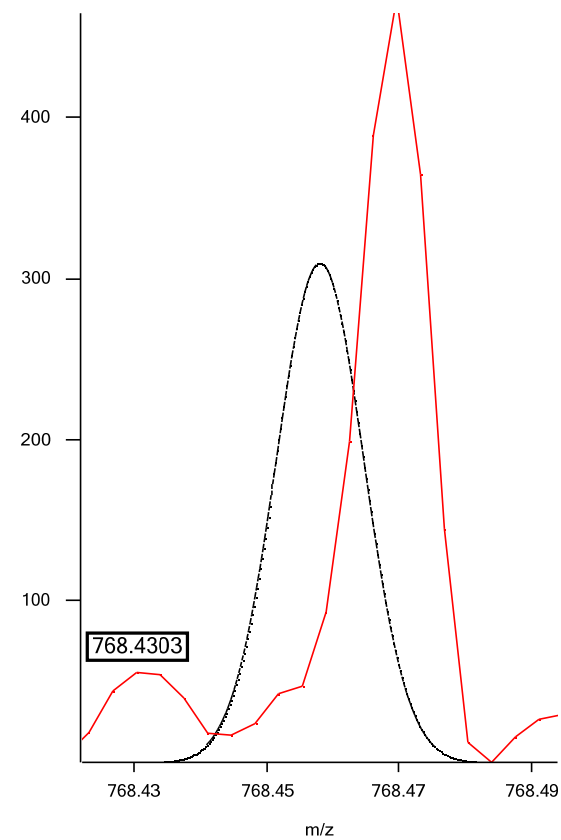

Positive ESI: PC 30:0; C<sub>38</sub>H<sub>77</sub>NO<sub>8</sub>P; theoretical  $m/z$  706.5387, (M+H)<sup>+</sup>; isotopic fit 0.0050

### Isotope 1

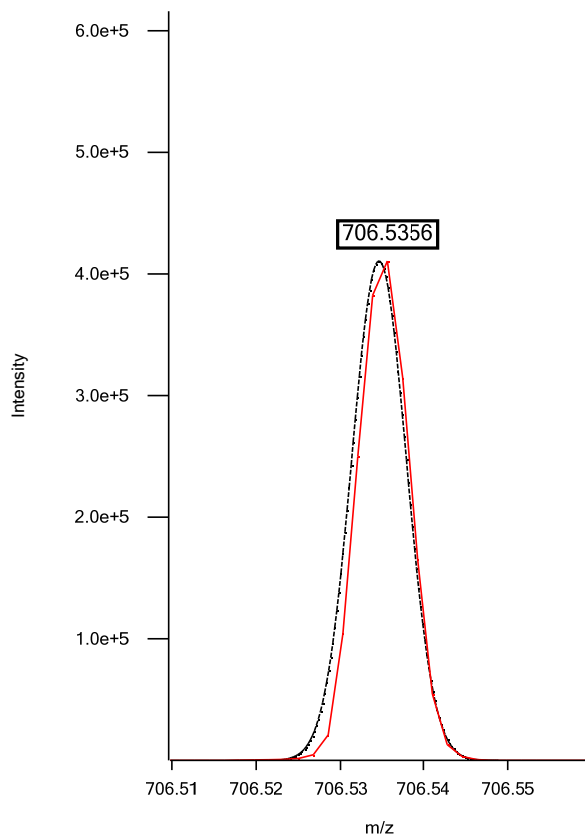

### Isotope 2

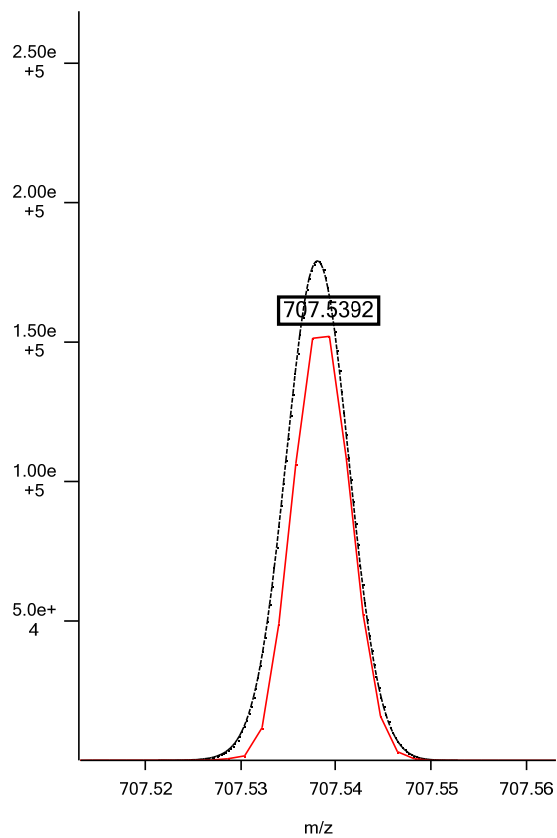

### Isotope 3

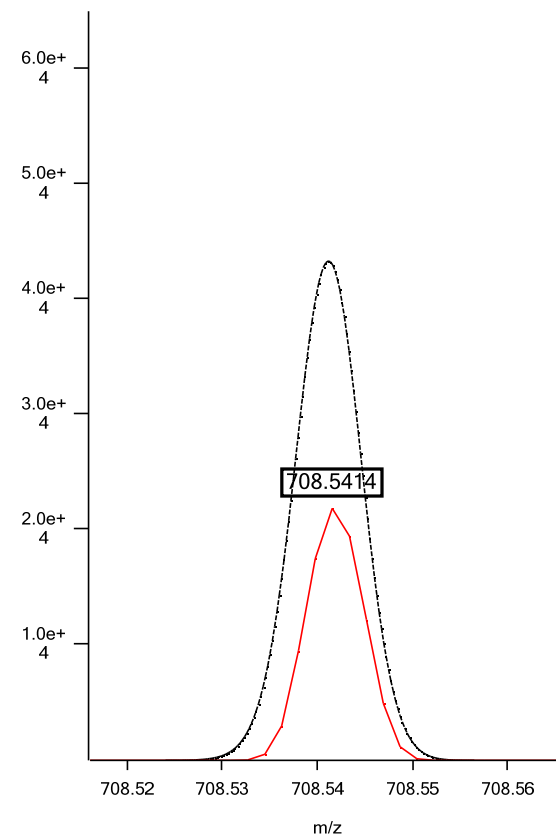



Positive ESI: PC 32:2; C<sub>40</sub>H<sub>77</sub>NO<sub>8</sub>P; theoretical *m/z* 730.5387, (M+H)<sup>+</sup>; isotopic fit 0.0069

### Isotope 1

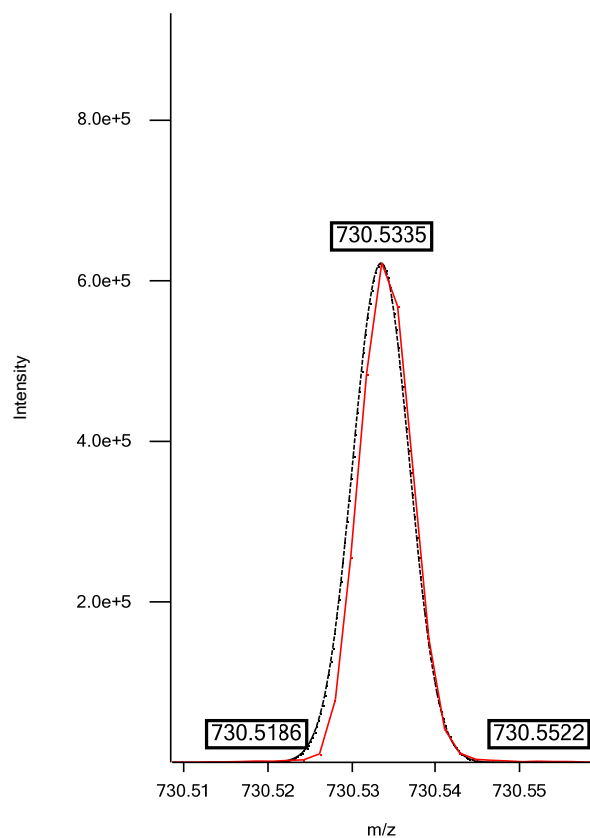

### Isotope 2

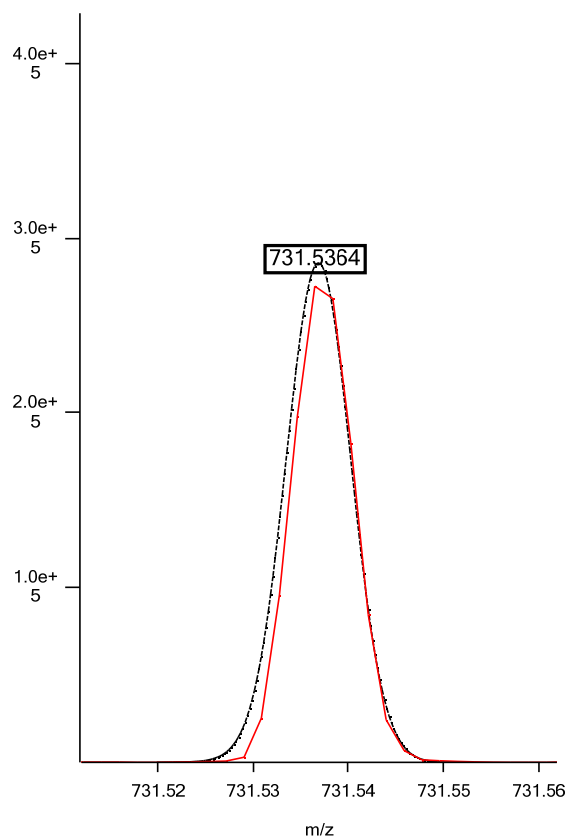

### Isotope 3

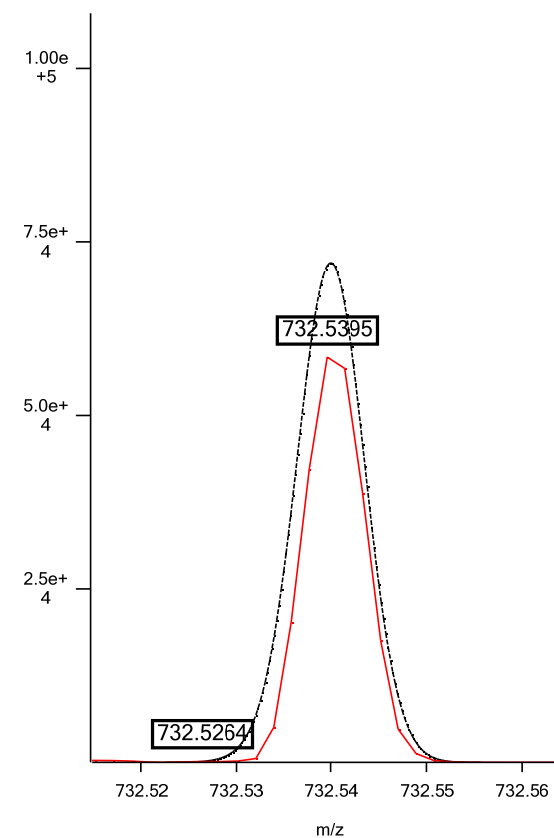

Positive ESI: PC 32:1; C<sub>40</sub>H<sub>79</sub>NO<sub>8</sub>P; theoretical *m/z* 732.5543, (M+H)<sup>+</sup>; isotopic fit 0.0052

### Isotope 1

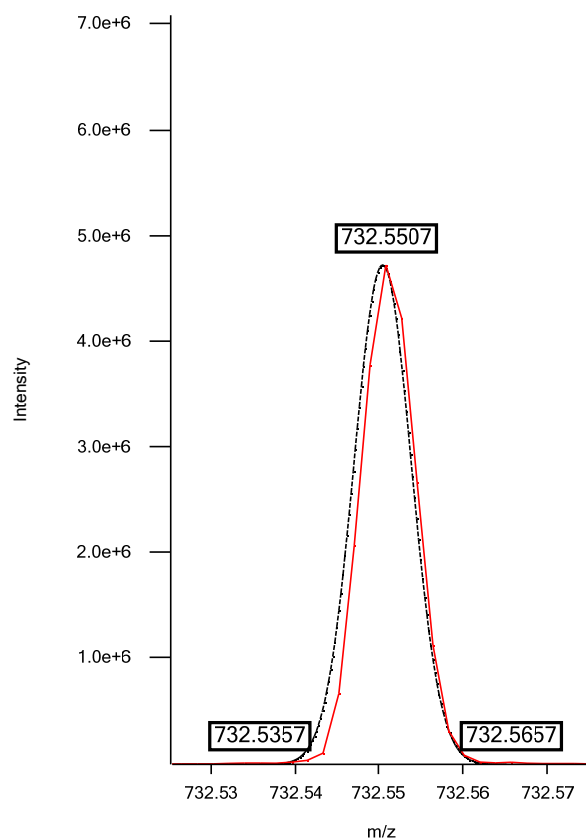

### Isotope 2

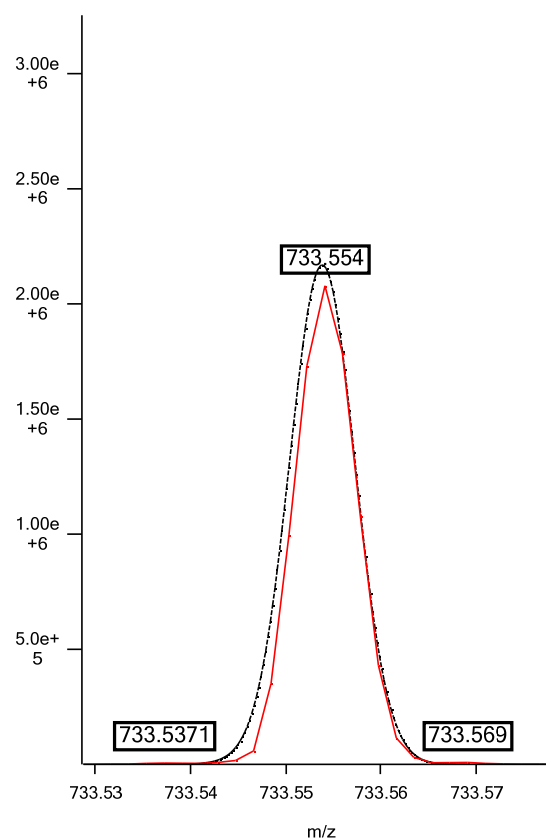

### Isotope 3

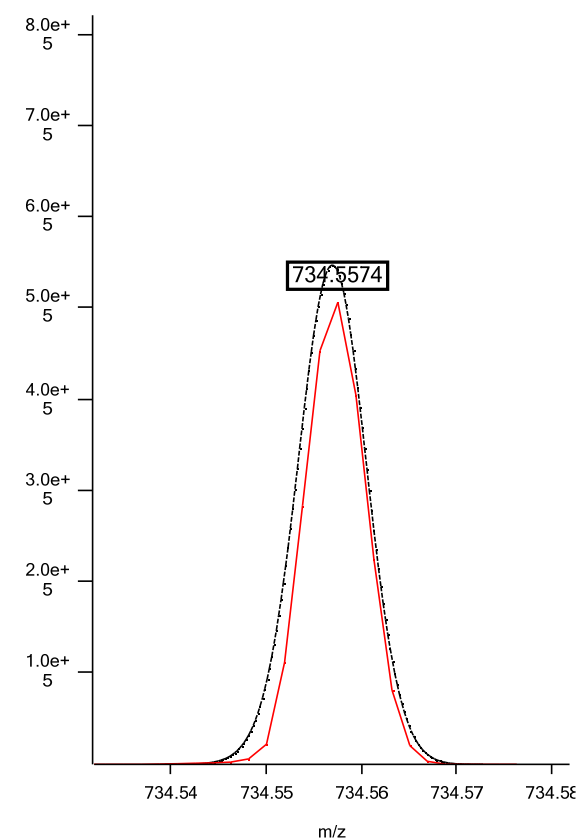

Positive ESI: PC 32:0; C<sub>40</sub>H<sub>81</sub>NO<sub>8</sub>P; theoretical *m/z* 734.5699, (M+H)<sup>+</sup>; isotopic fit 0.0045

### Isotope 1

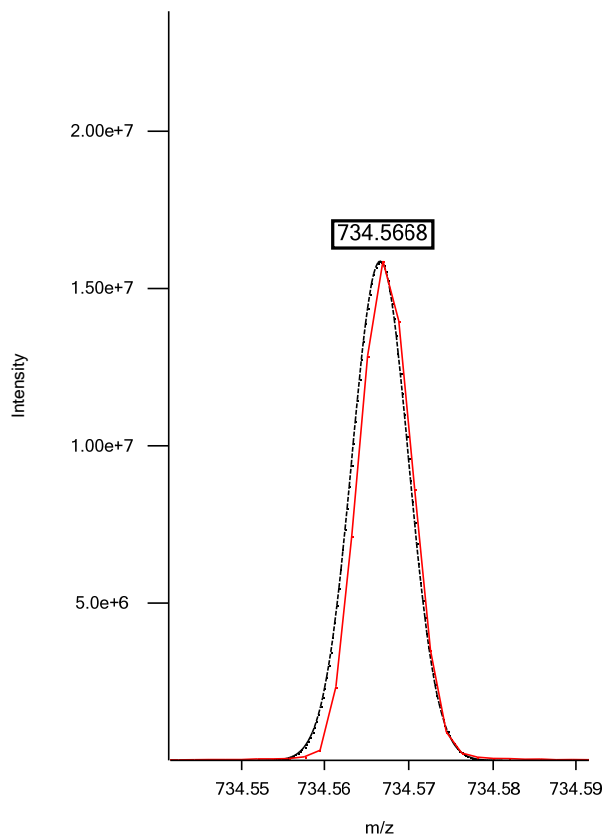

### Isotope 2

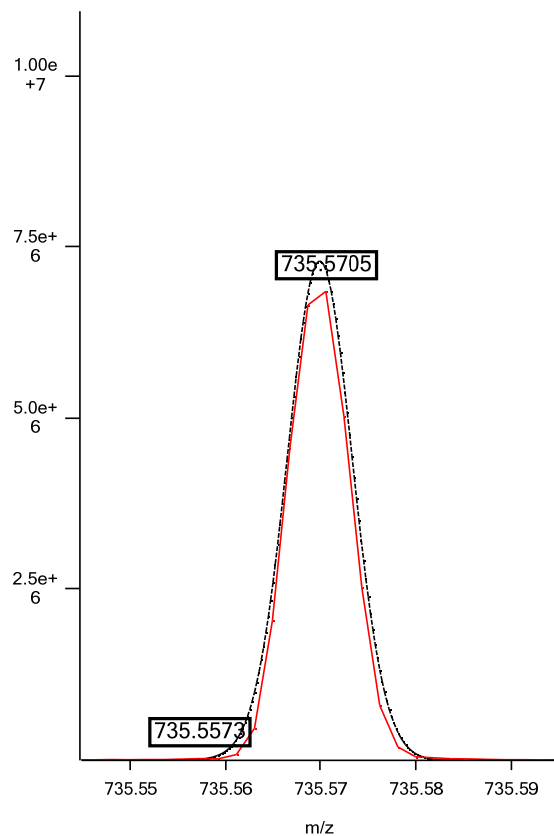

### Isotope 3

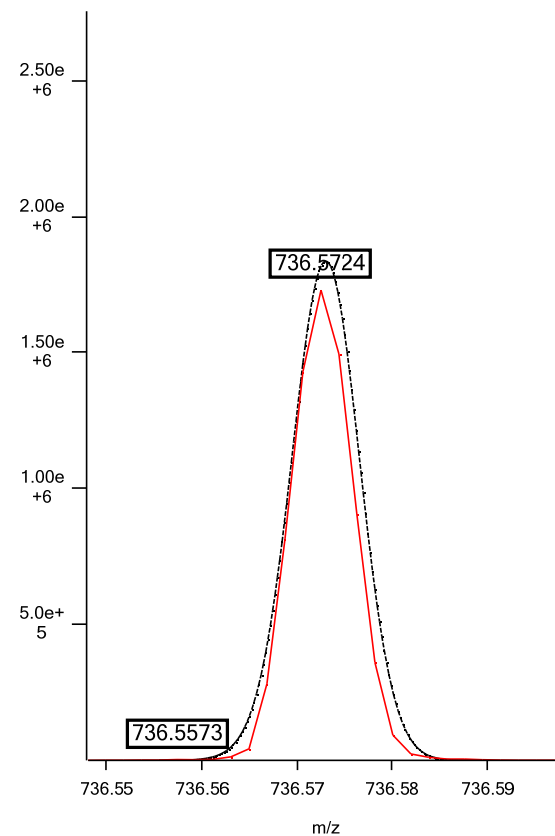

Positive ESI: PC 16:0e/16:0; C<sub>40</sub>H<sub>83</sub>NO<sub>7</sub>P; theoretical  $m/z$  720.5907, (M+H)<sup>+</sup>; isotopic fit 0.0039

### Isotope 1

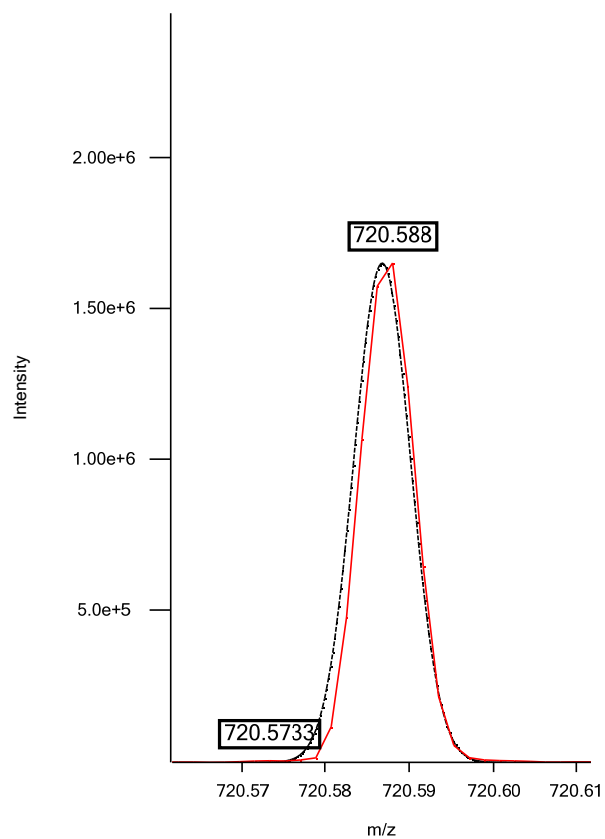

### Isotope 2

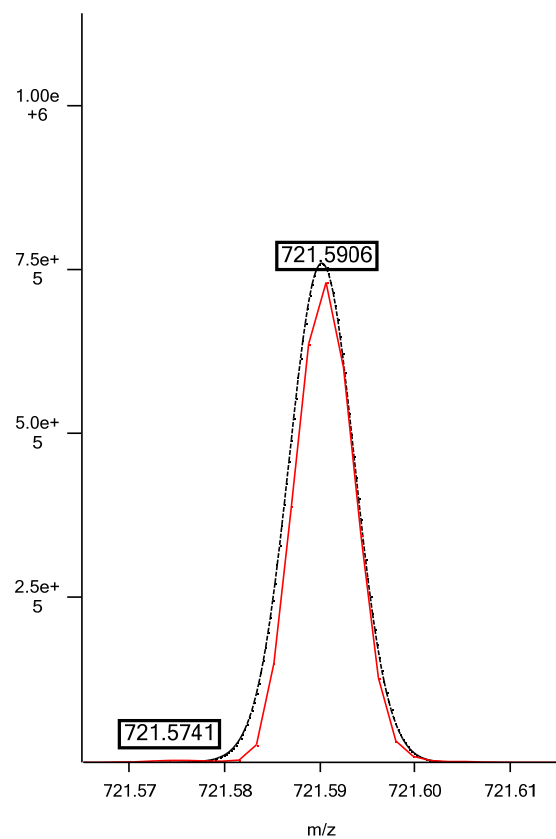

### Isotope 3

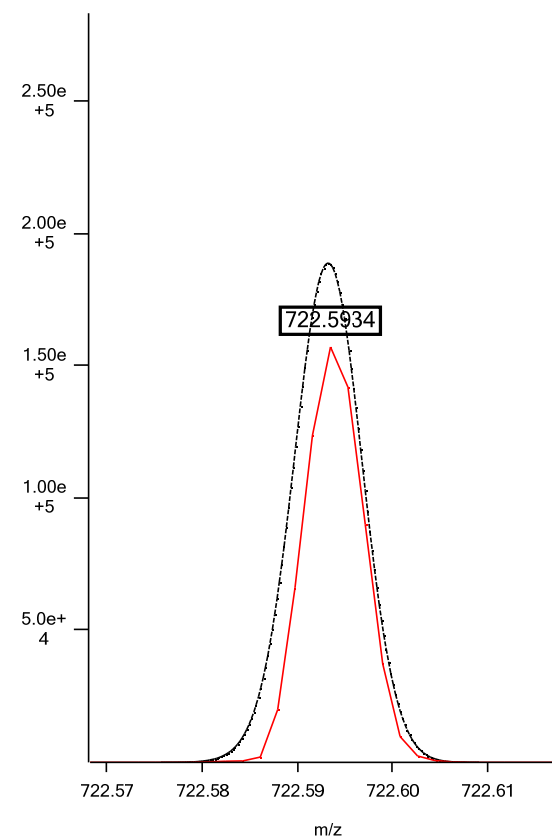

Positive ESI: PC 33:2; C<sub>41</sub>H<sub>79</sub>NO<sub>8</sub>P; theoretical *m/z* 744.5543, (M+H)<sup>+</sup>; isotopic fit 0.0066

### Isotope 1

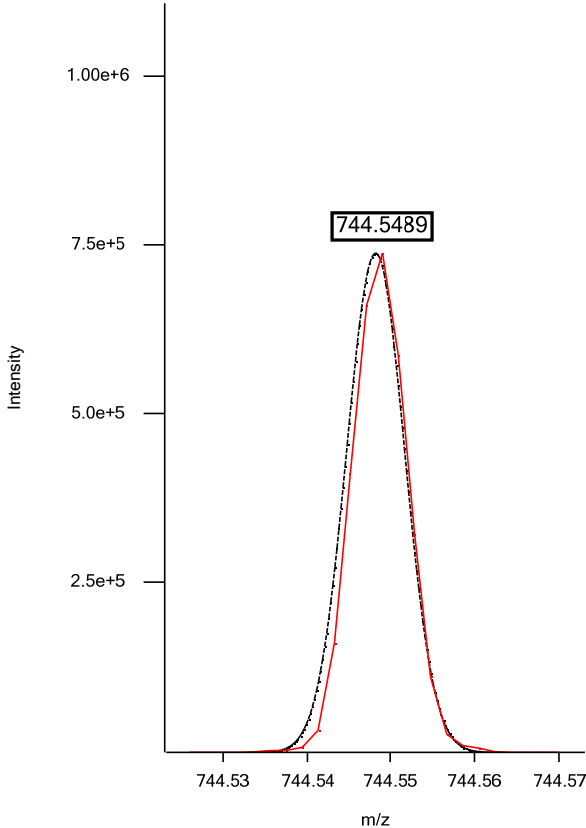

### Isotope 2

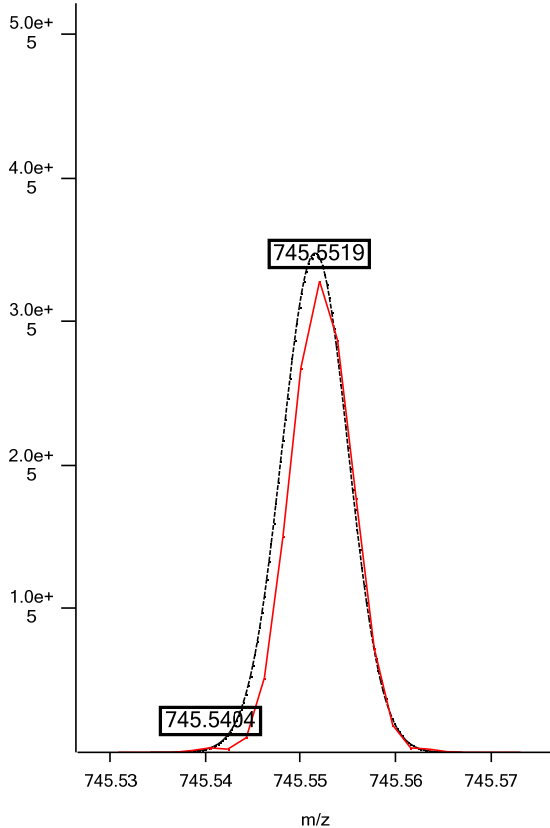

### Isotope 3

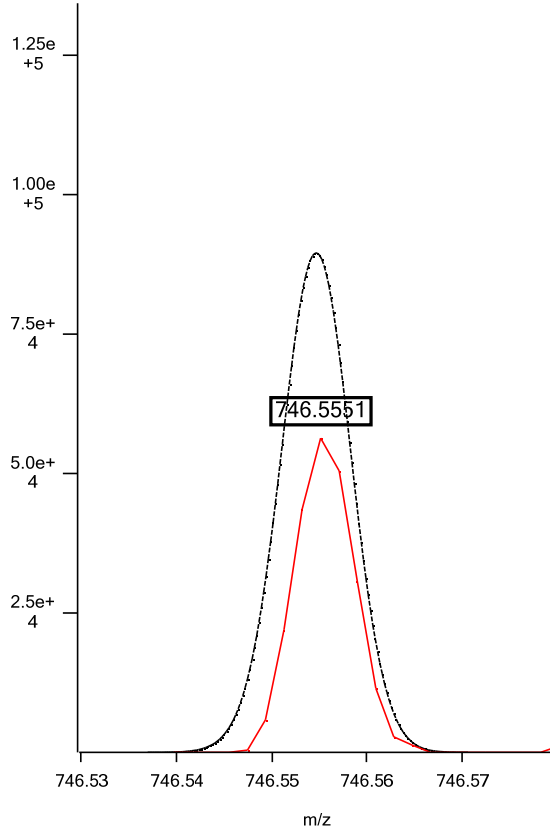

Positive ESI: PC 33:1; C<sub>41</sub>H<sub>81</sub>NO<sub>8</sub>P; theoretical *m/z* 746.5699, (M+H)<sup>+</sup>; isotopic fit 0.0075

### Isotope 1

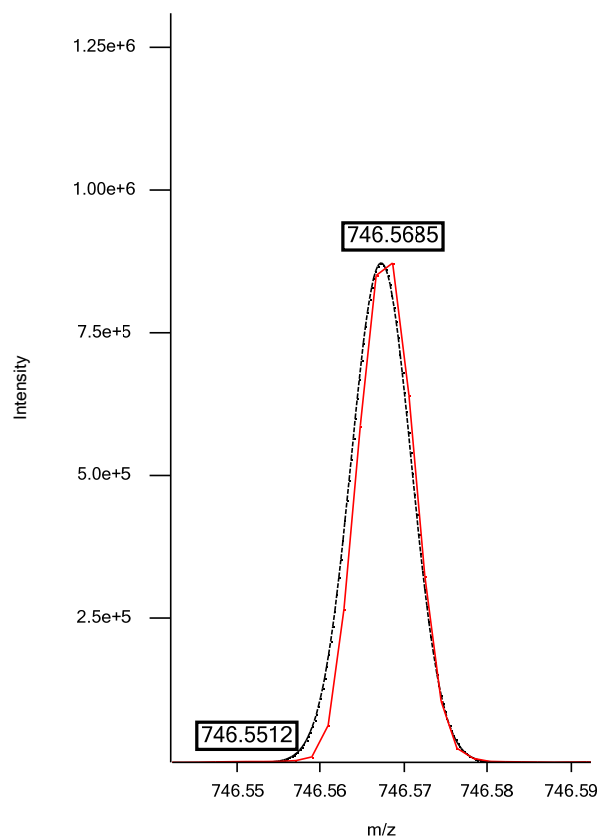

### Isotope 2

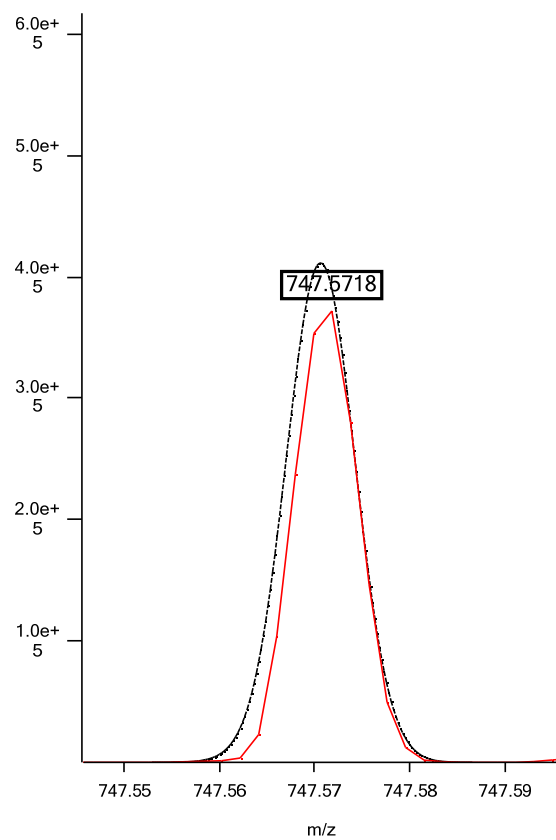

### Isotope 3

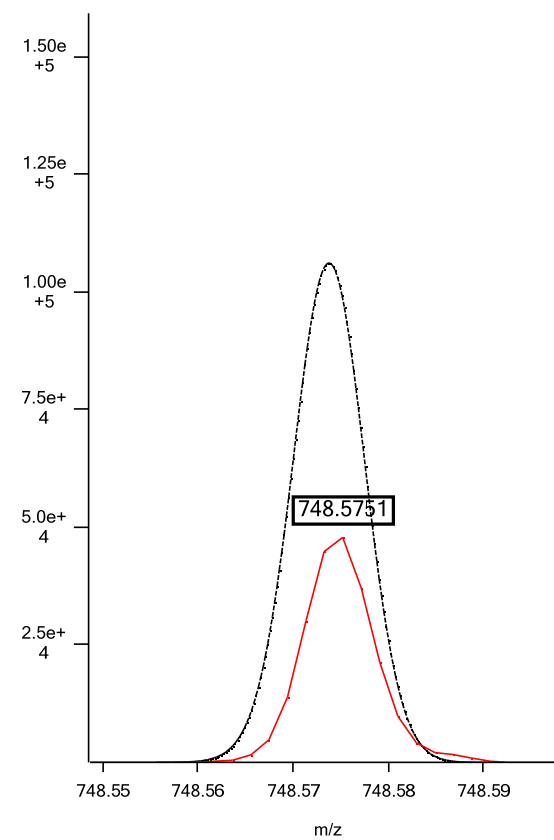

Positive ESI: PC 34:4; C<sub>42</sub>H<sub>77</sub>NO<sub>8</sub>P; theoretical *m/z* 754.5387, (M+H)<sup>+</sup>; isotopic fit 0.0066

### Isotope 1

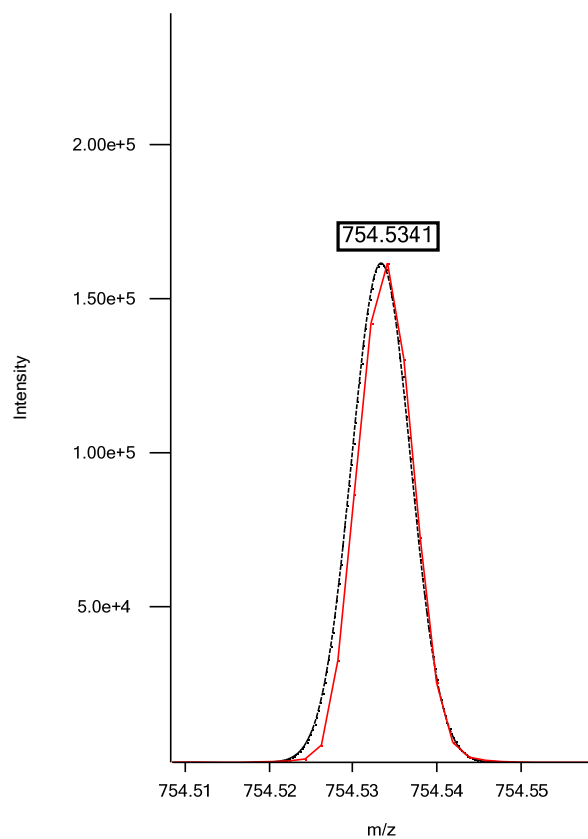

### Isotope 2

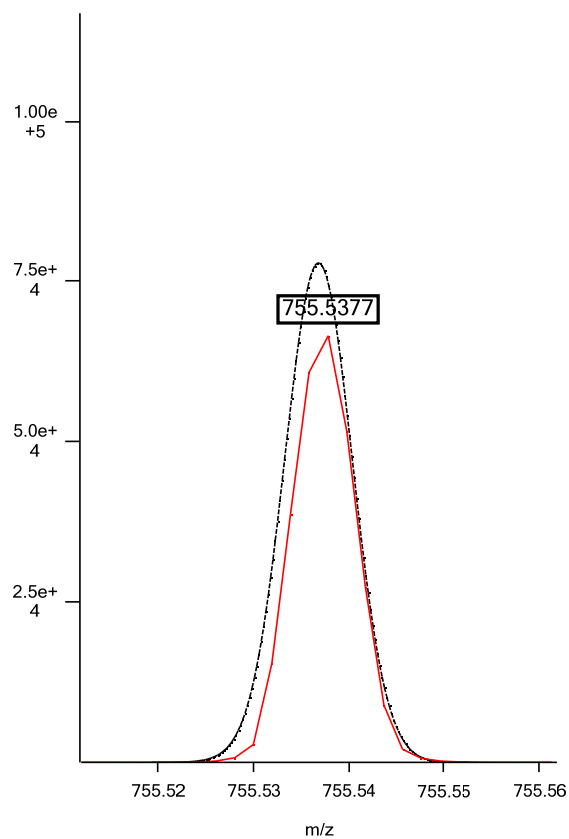

### Isotope 3

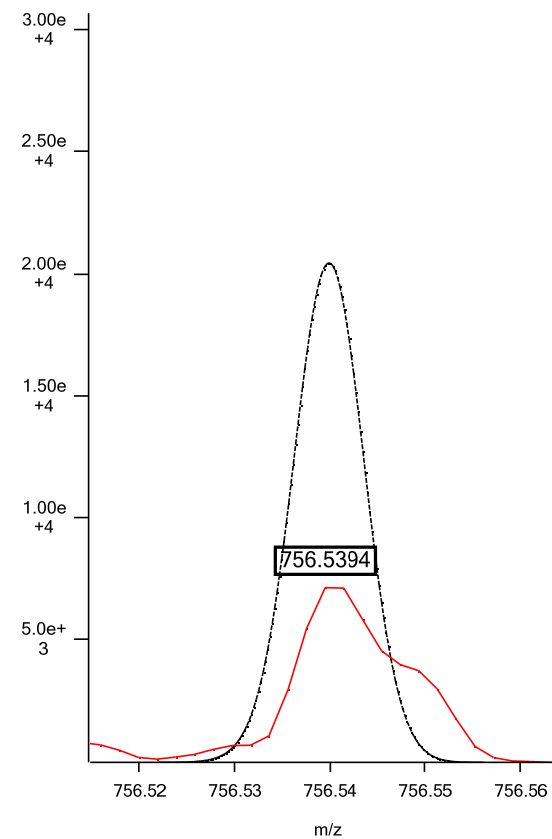

Positive ESI: PC 34:3; C<sub>42</sub>H<sub>79</sub>NO<sub>8</sub>P; theoretical *m/z* 756.5543, (M+H)<sup>+</sup>; isotopic fit 0.0025

### Isotope 1

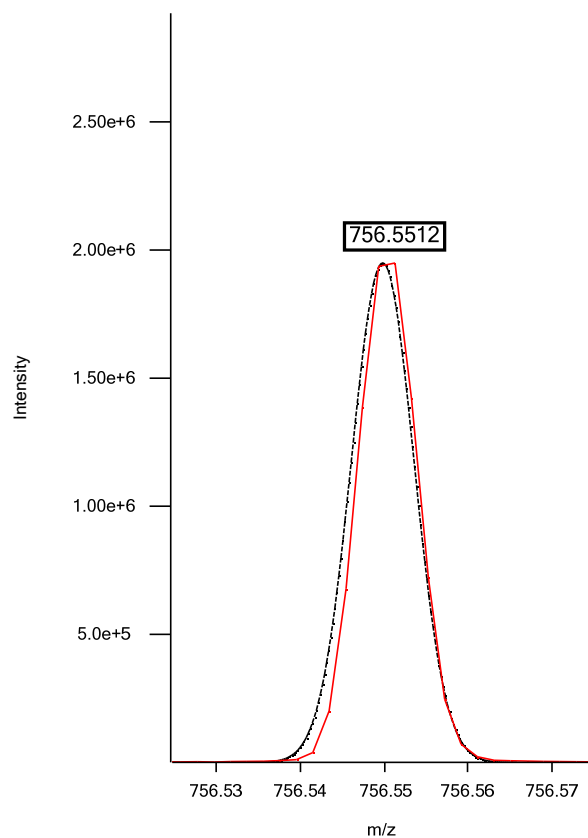

### Isotope 2

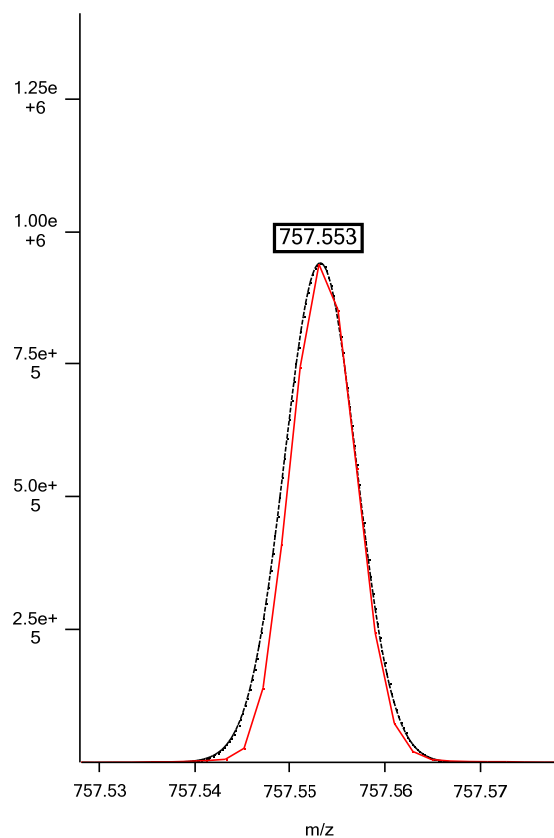

### Isotope 3

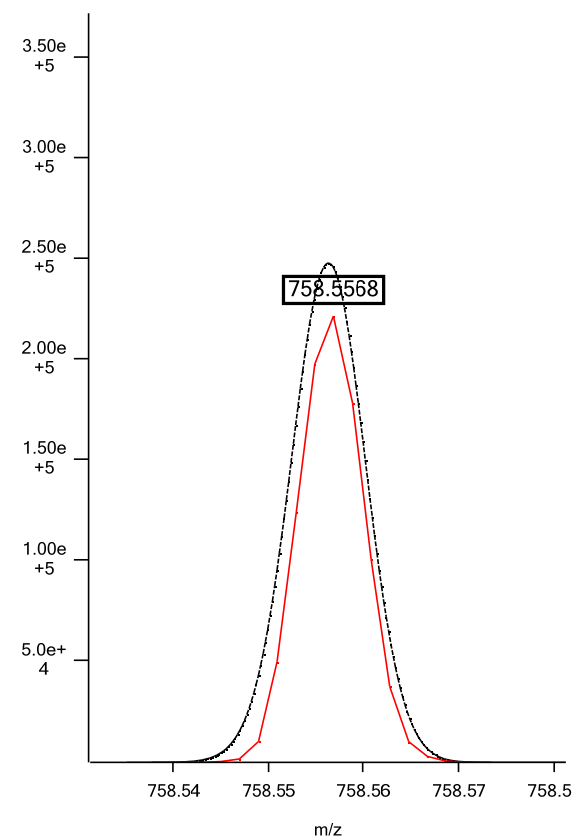



Positive ESI: Oxidized PC 18:0/Hydroxy-16:3;  $C_{42}H_{79}NO_9P$ ; theoretical  $m/z$  772.5492,  $(M+H)^+$ ; isotopic fit 0.0106

### Isotope 1

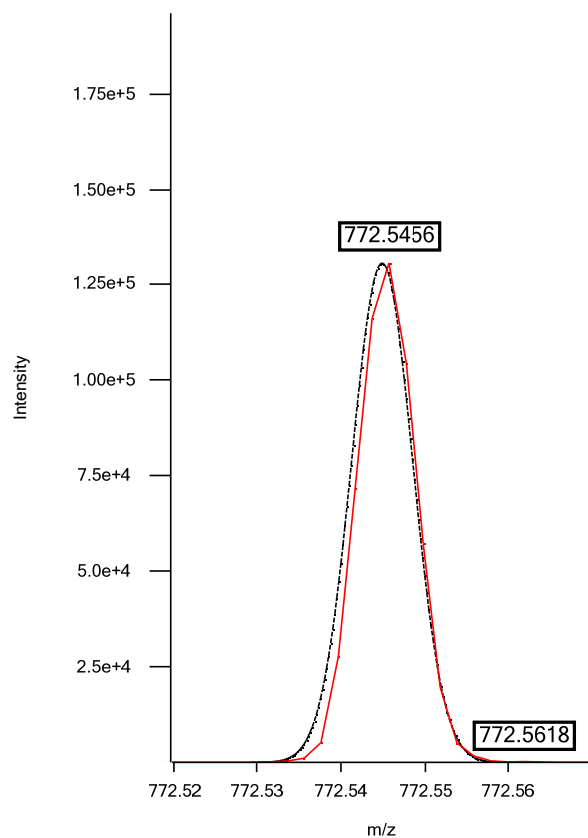

### Isotope 2

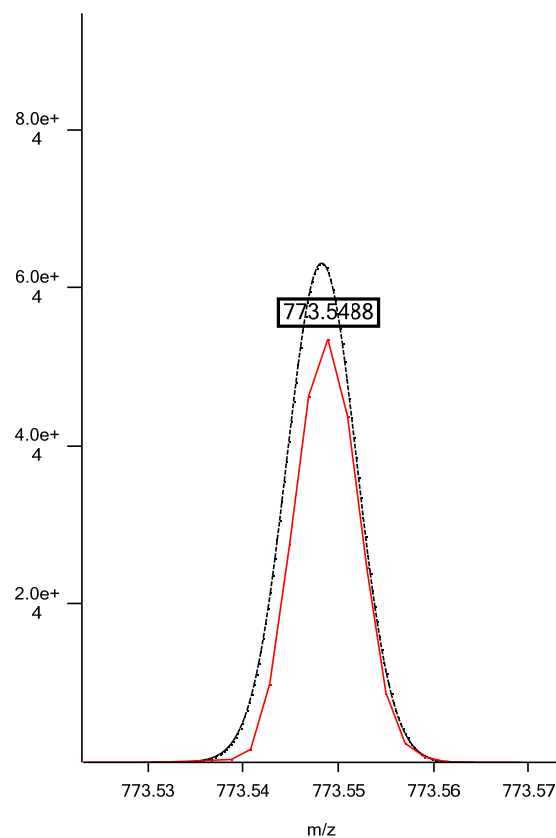

### Isotope 3

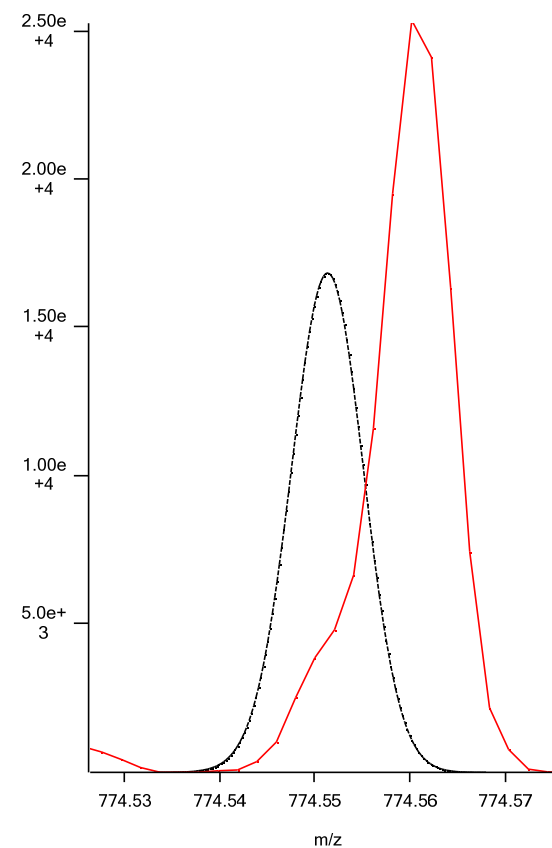

Positive ESI: Oxidized PC 16:0/Hydroperoxy-18:3;  $C_{42}H_{79}NO_{10}P$ ; theoretical  $m/z$  788.5441, (M+H)<sup>+</sup>; isotopic fit 0.0190

### Isotope 1

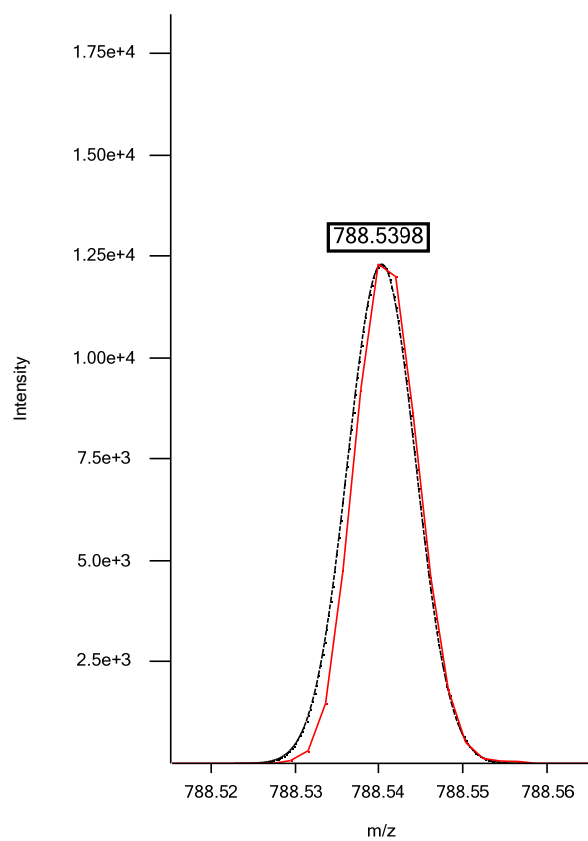

### Isotope 2

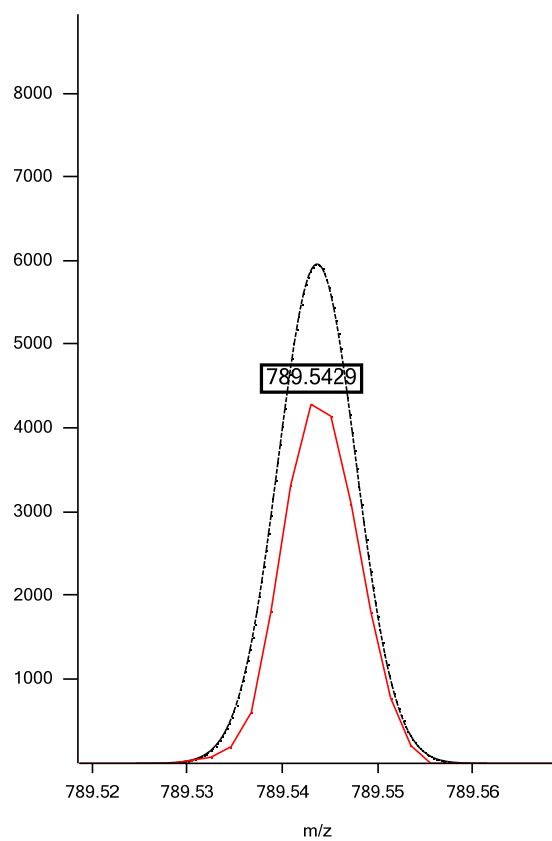

### Isotope 3

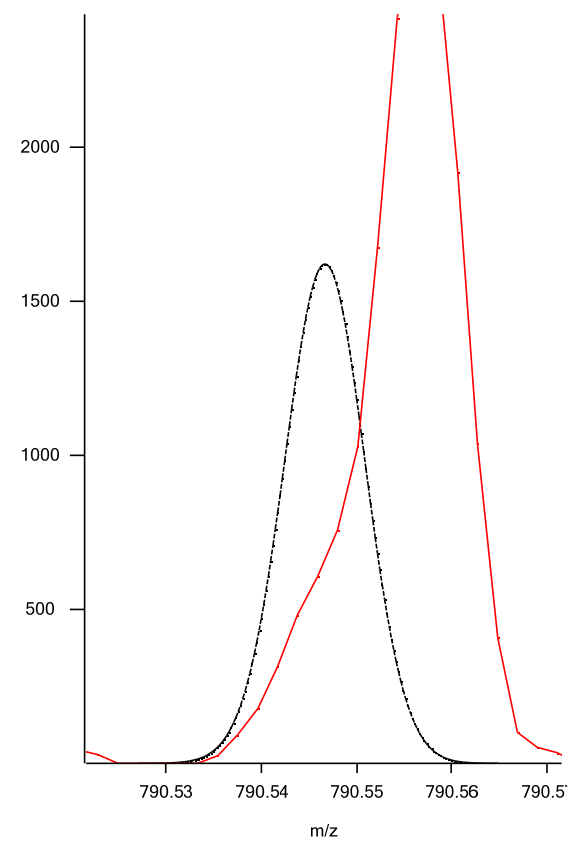

Positive ESI: PC 34:2; C<sub>42</sub>H<sub>81</sub>NO<sub>8</sub>P; theoretical *m/z* 758.5699, (M+H)<sup>+</sup>; isotopic fit 0.0126

### Isotope 1

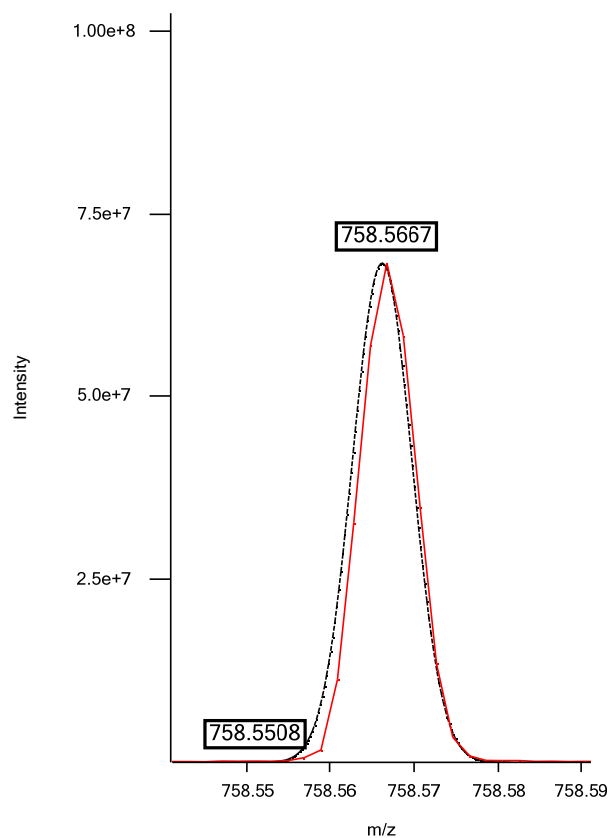

### Isotope 2

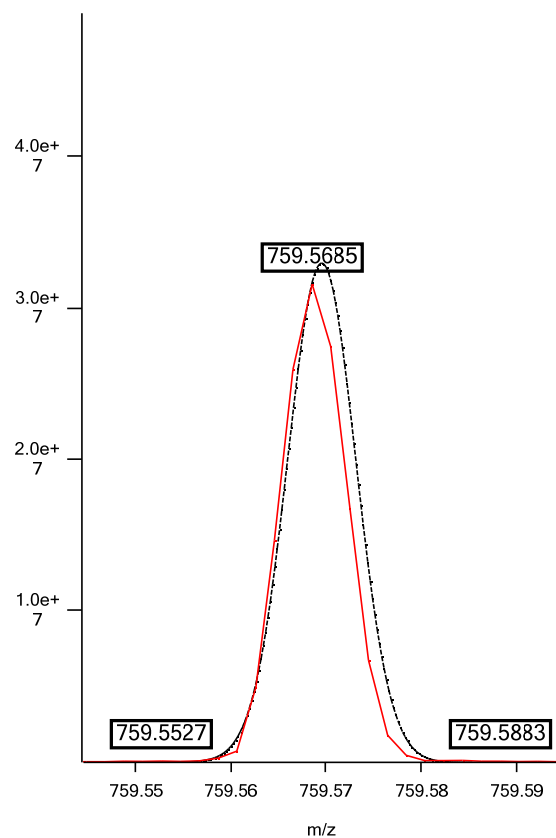

### Isotope 3

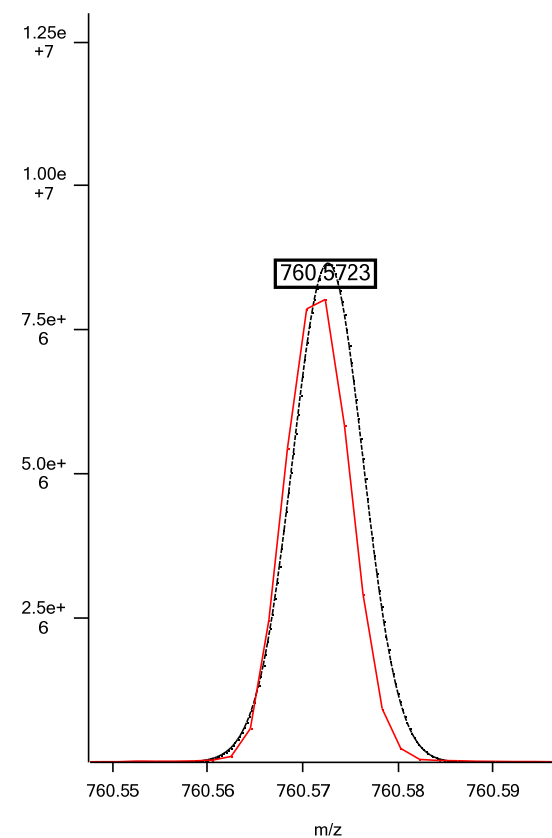

Positive ESI: Oxidized PC 16:0/Hydroxy-18:2; C<sub>42</sub>H<sub>81</sub>NO<sub>9</sub>P; theoretical *m/z* 774.5649, (M+H)<sup>+</sup>; isotopic fit 0.0328

### Isotope 1

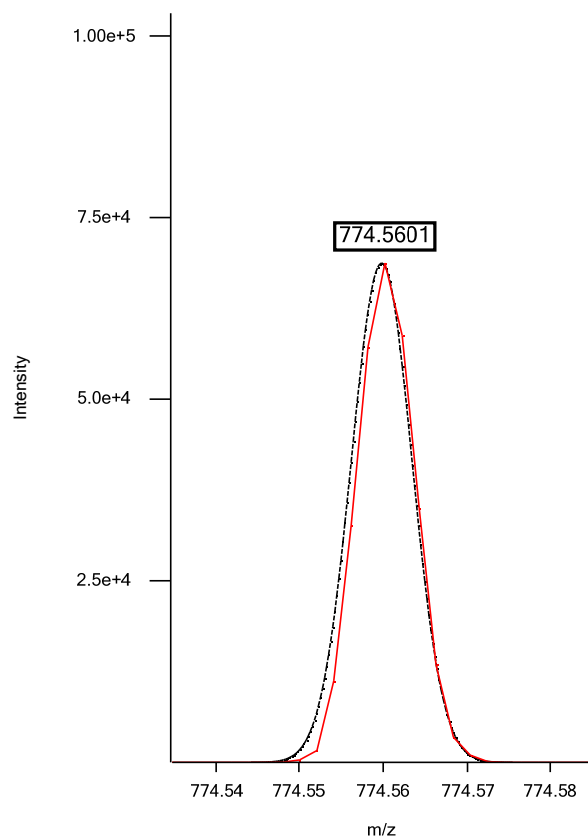

### Isotope 2

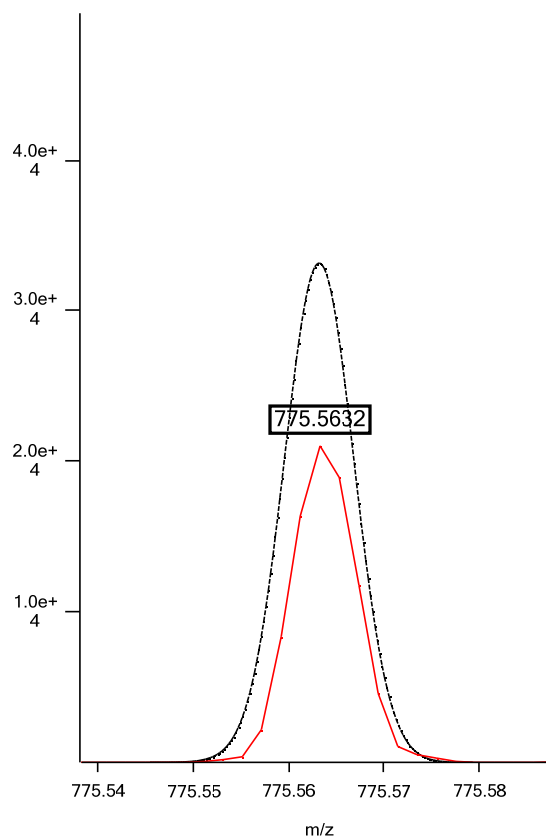

### Isotope 3

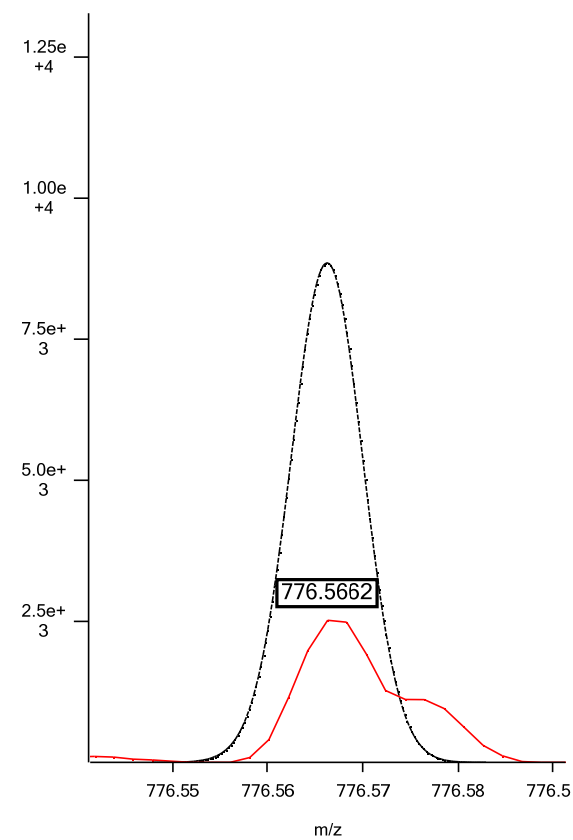

Positive ESI: Oxidized PC 16:0/Hydroperoxy-18:2;  $C_{42}H_{81}NO_{10}P$ ; theoretical  $m/z$  790.5598, (M+H)<sup>+</sup>; isotopic fit 0.0126

### Isotope 1

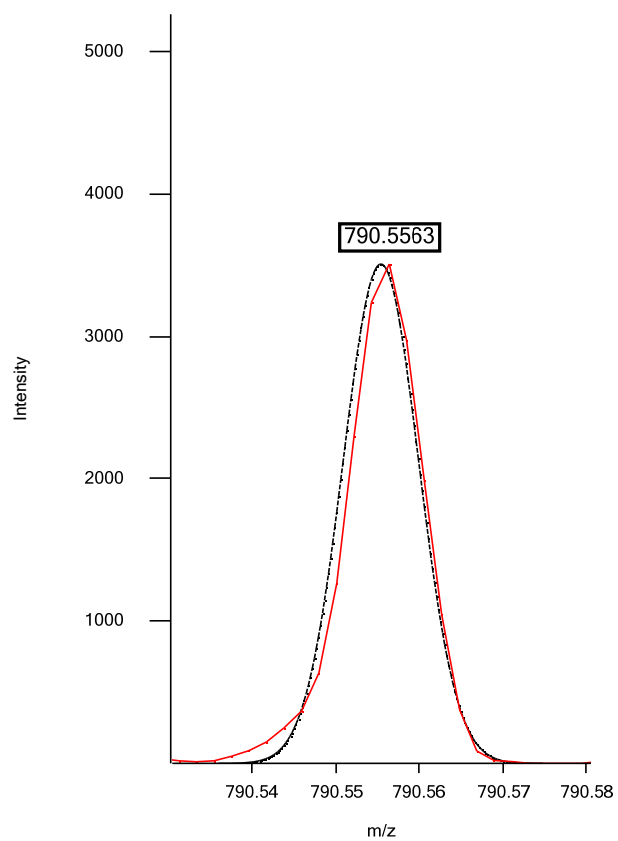

### Isotope 2

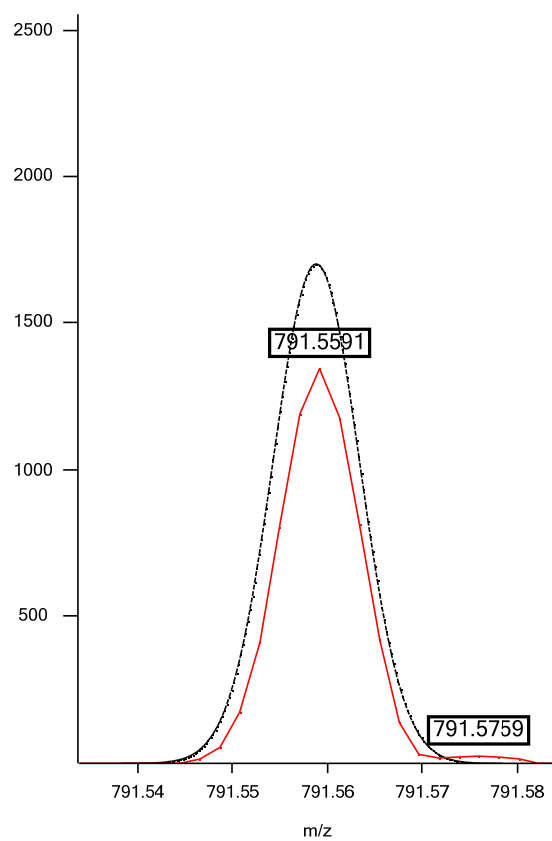

### Isotope 3

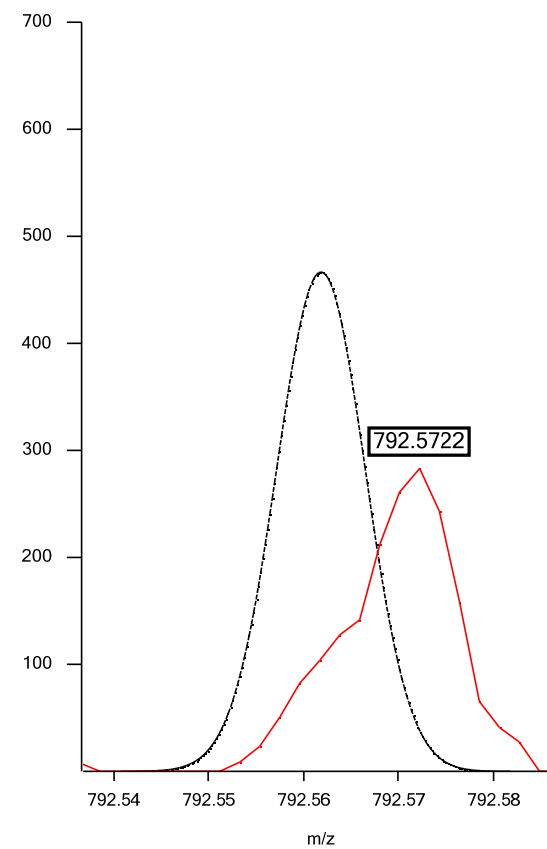

Positive ESI: PC 16:0e/18:2 or 16:1p/18:1; C<sub>42</sub>H<sub>83</sub>NO<sub>7</sub>P; theoretical *m/z* 744.5907, (M+H)<sup>+</sup>; isotopic fit 0.0024

### Isotope 1

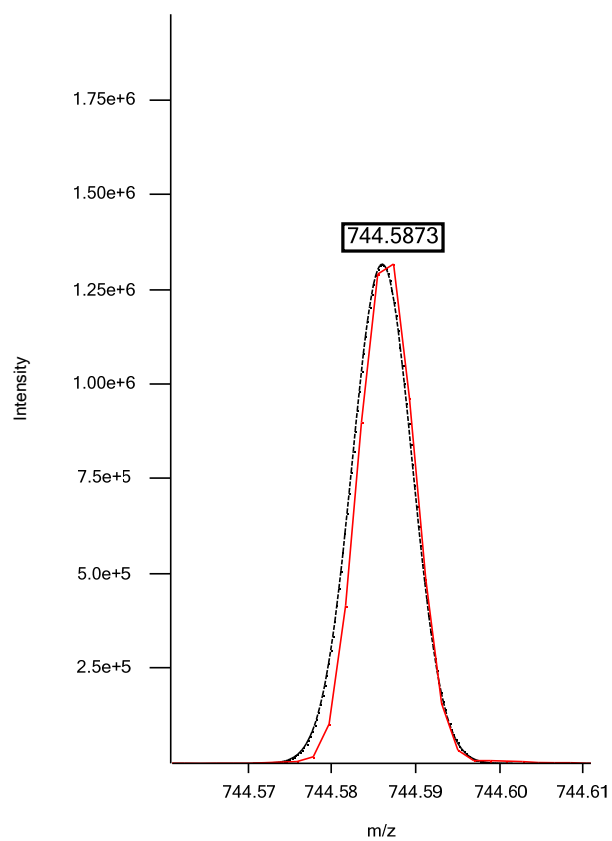

### Isotope 2

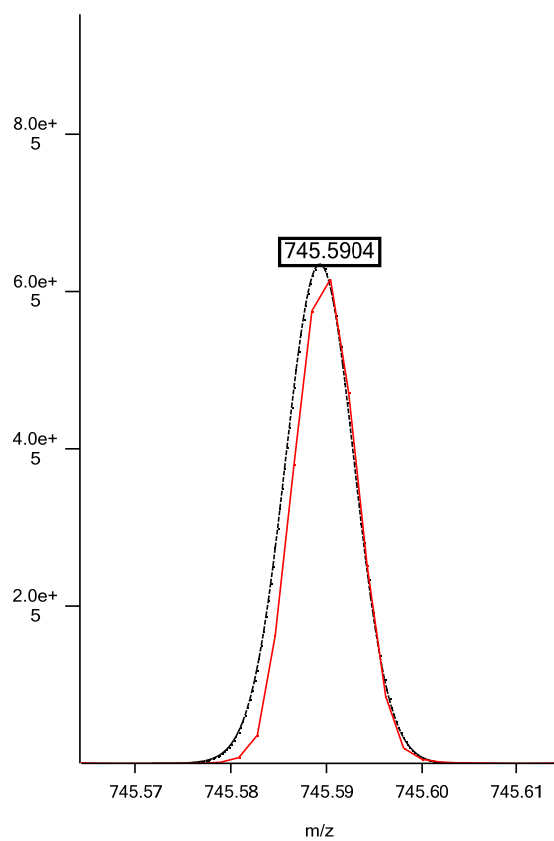

### Isotope 3

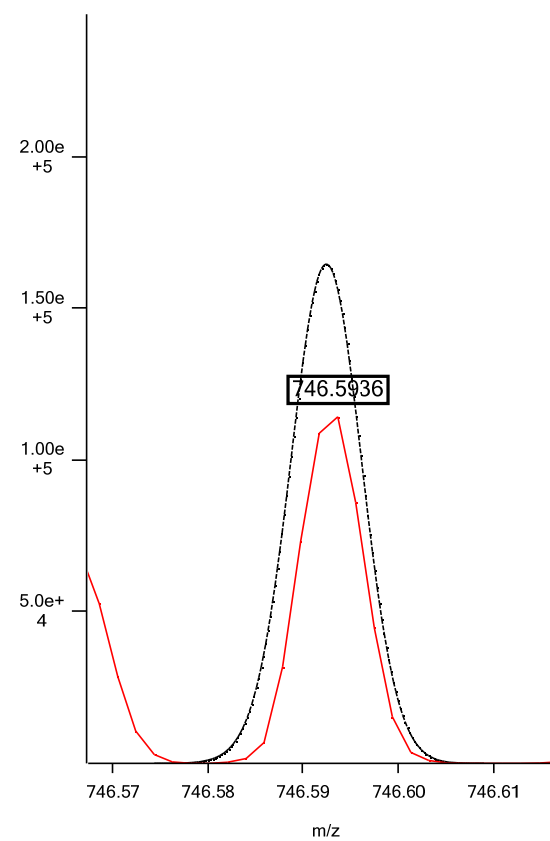

Positive ESI: PC 34:1; C<sub>42</sub>H<sub>83</sub>NO<sub>8</sub>P; theoretical  $m/z$  760.5856, (M+H)<sup>+</sup>; isotopic fit 0.0117

### Isotope 1

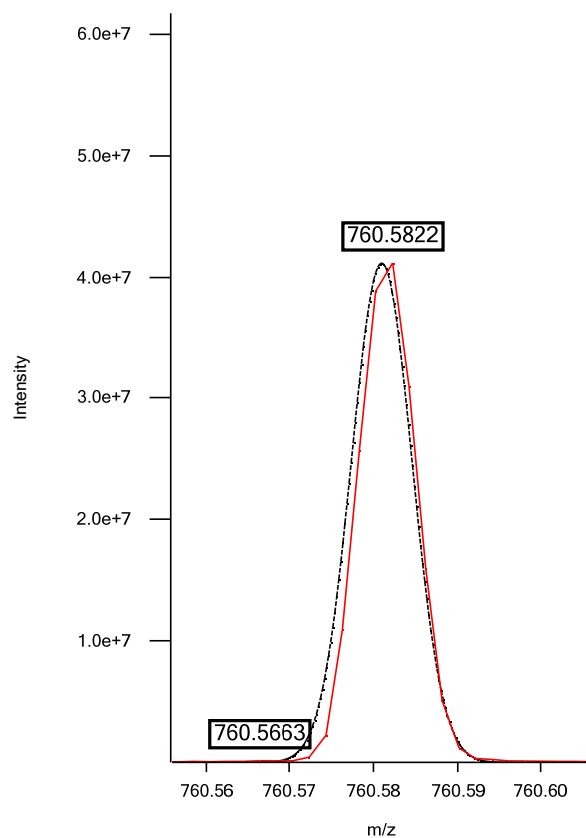

### Isotope 2

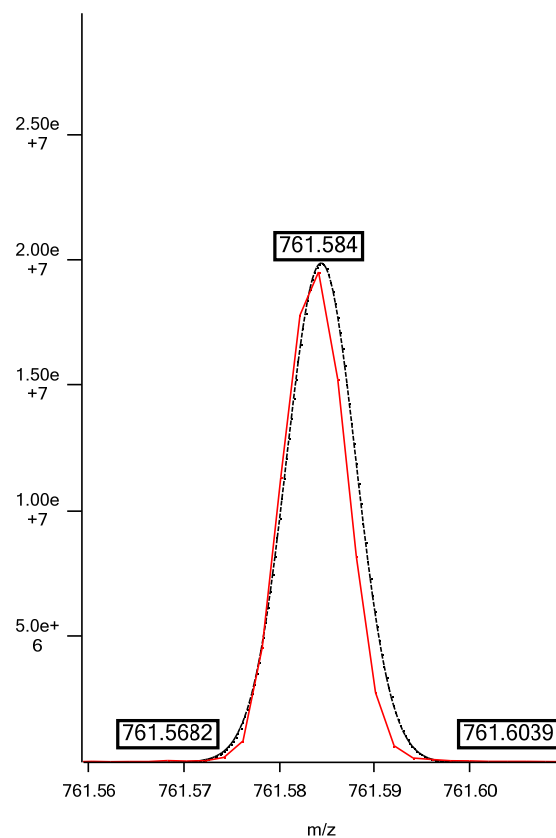

### Isotope 3

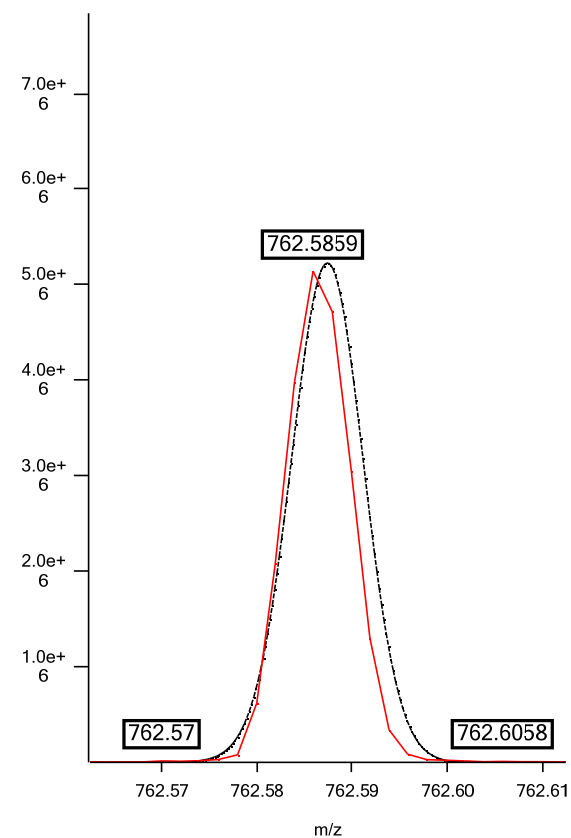

Positive ESI: Oxidized PC 16:0/Hydroxy-18:1;  $C_{42}H_{83}NO_9P$ ; theoretical  $m/z$  776.5805,  $(M+H)^+$ ; isotopic fit 0.0366

### Isotope 1

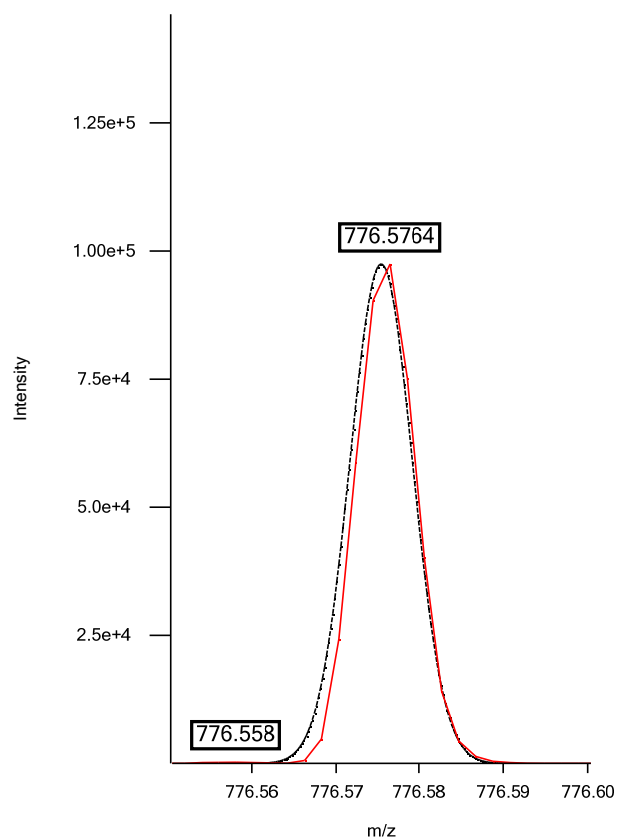

### Isotope 2

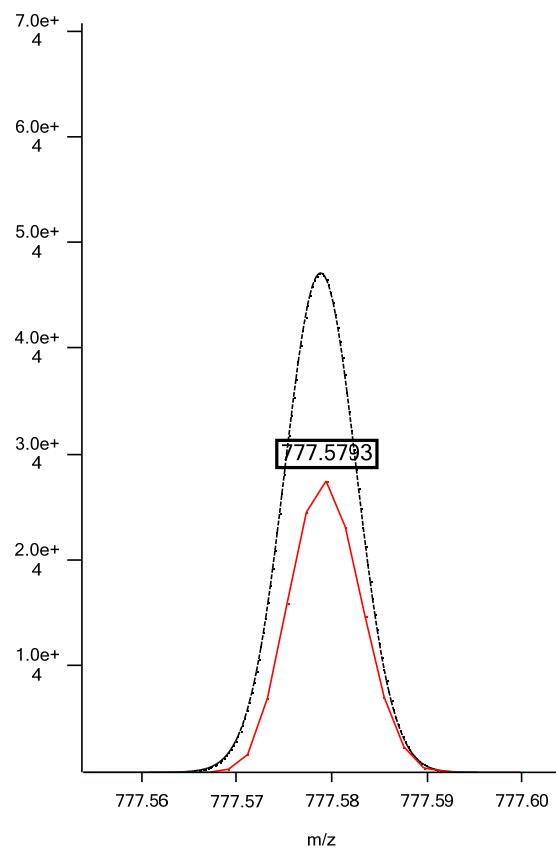

### Isotope 3

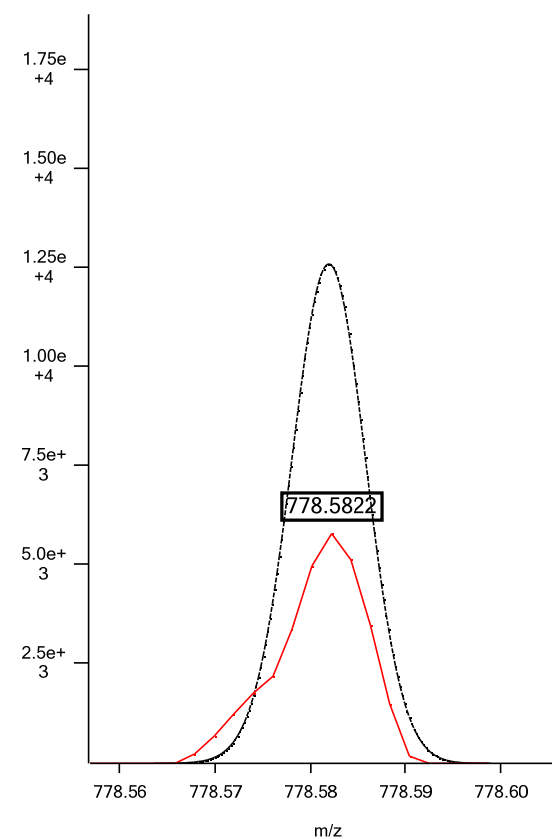



Positive ESI: PC 16:0e/18:1 or 16:1p/18:0; C<sub>42</sub>H<sub>85</sub>NO<sub>7</sub>P; theoretical *m/z* 746.6063, (M+H)<sup>+</sup>; isotopic fit 0.0070

### Isotope 1

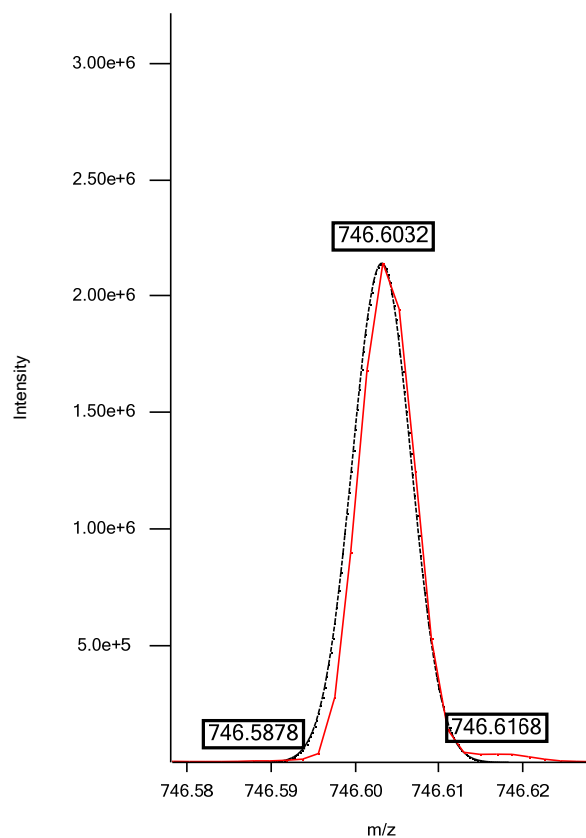

### Isotope 2

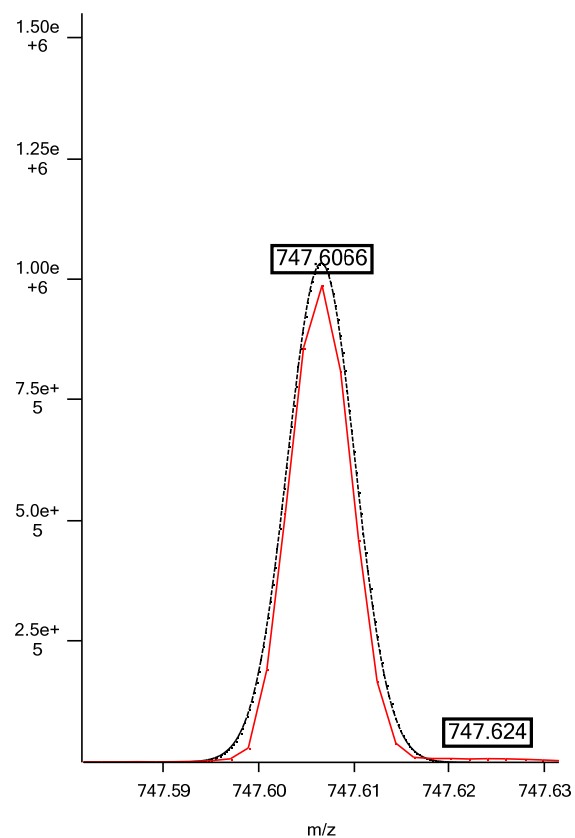

### Isotope 3

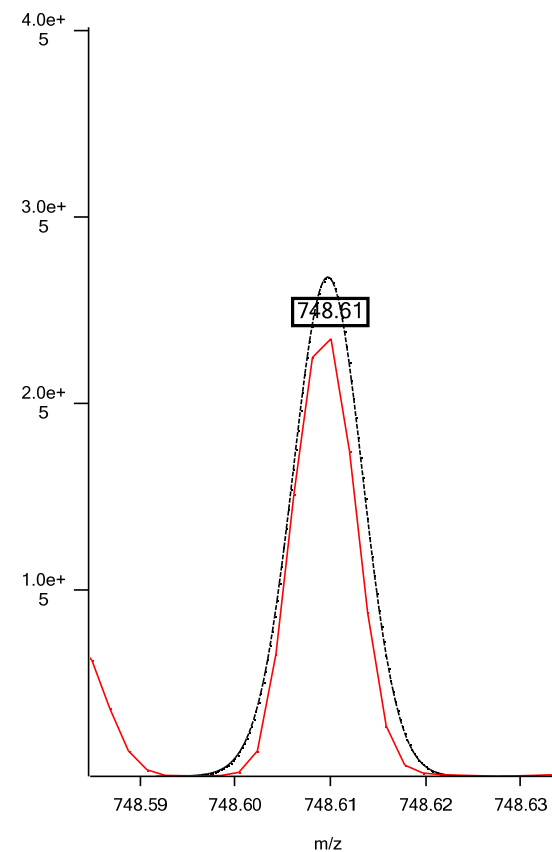

Positive ESI: PC 34:0; C<sub>42</sub>H<sub>85</sub>NO<sub>8</sub>P; theoretical *m/z* 762.6012, (M+H)<sup>+</sup>; isotopic fit 0.0079

### Isotope 1

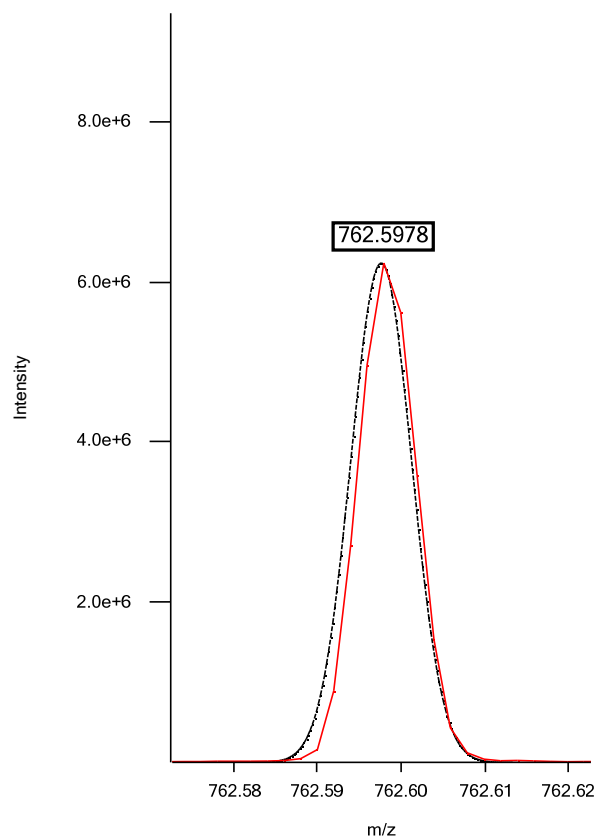

### Isotope 2

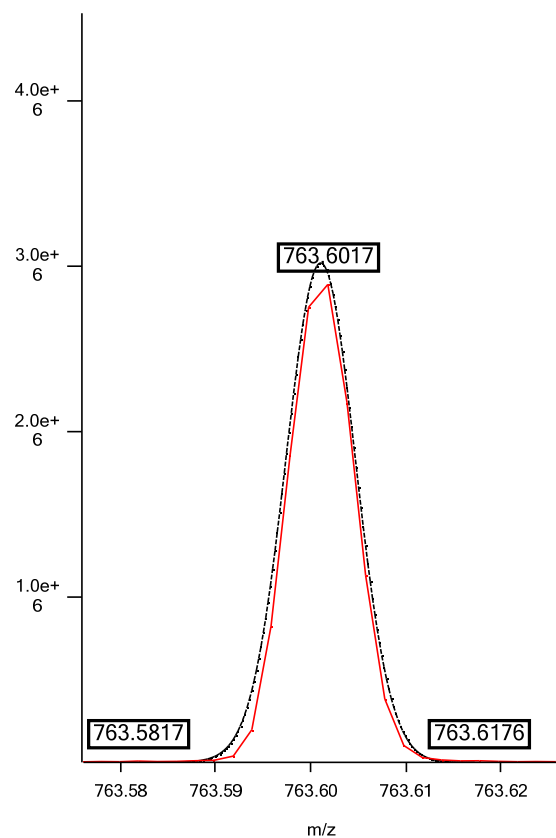

### Isotope 3

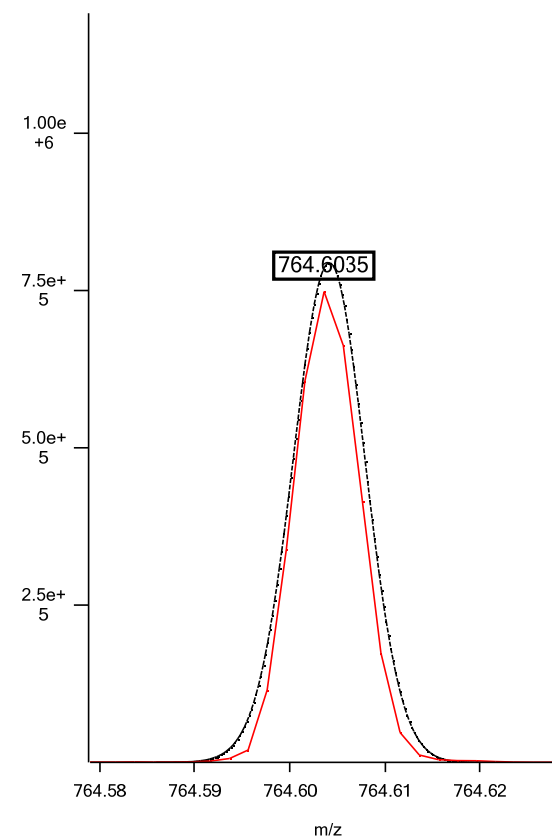

Positive ESI: PC 16:0e/18:0; C<sub>42</sub>H<sub>87</sub>NO<sub>7</sub>P; theoretical *m/z* 748.6220, (M+H)<sup>+</sup>; isotopic fit 0.0046

### Isotope 1

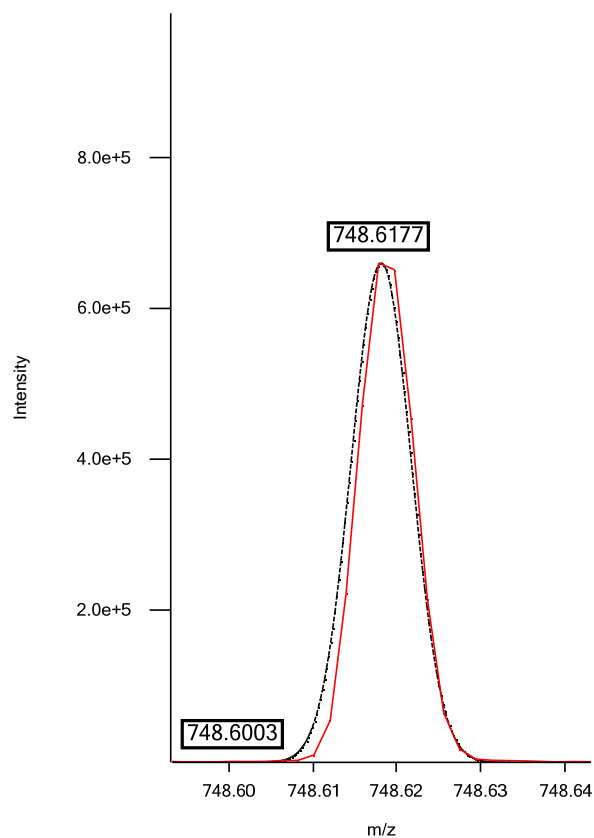

### Isotope 2

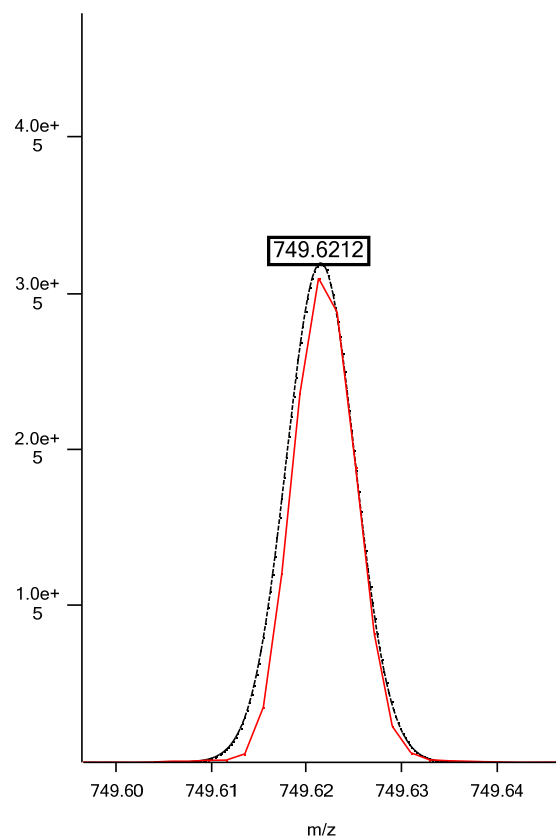

### Isotope 3

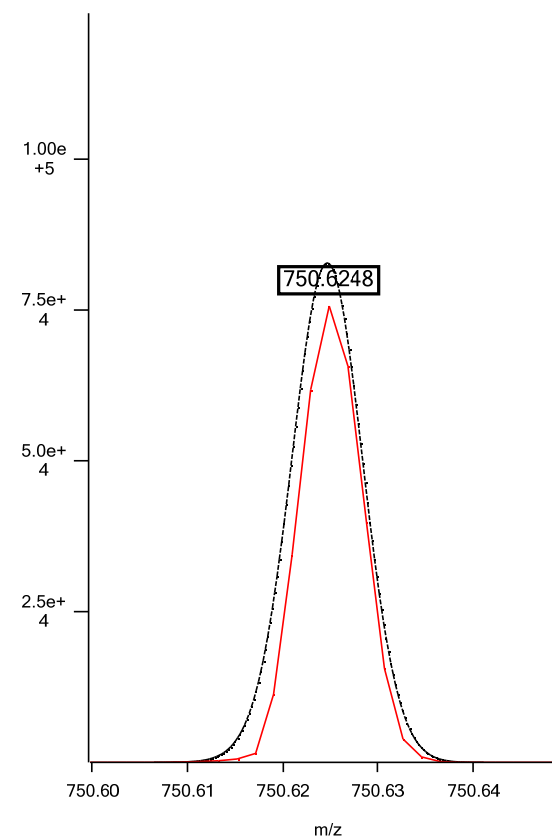

Positive ESI: PC 35:4; C<sub>43</sub>H<sub>79</sub>NO<sub>8</sub>P; theoretical  $m/z$  768.5543, (M+H)<sup>+</sup>; isotopic fit 0.0089

### Isotope 1

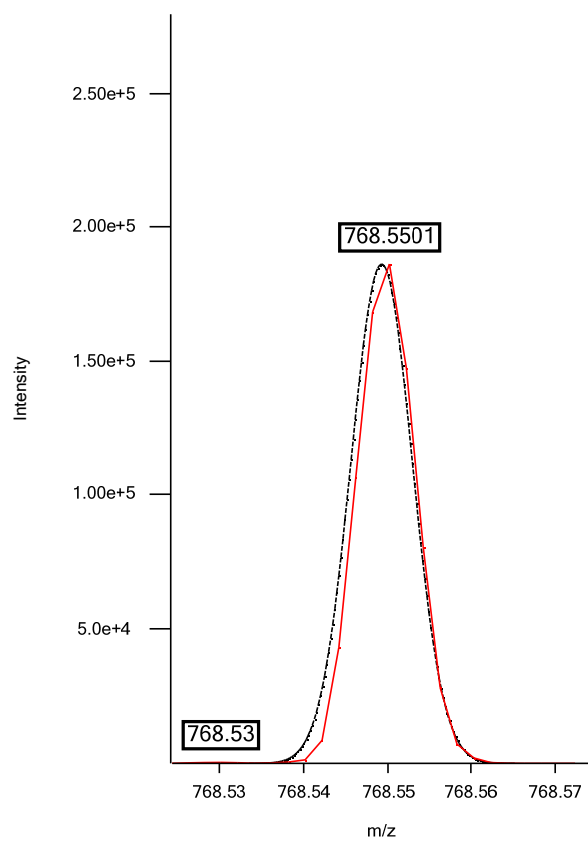

### Isotope 2

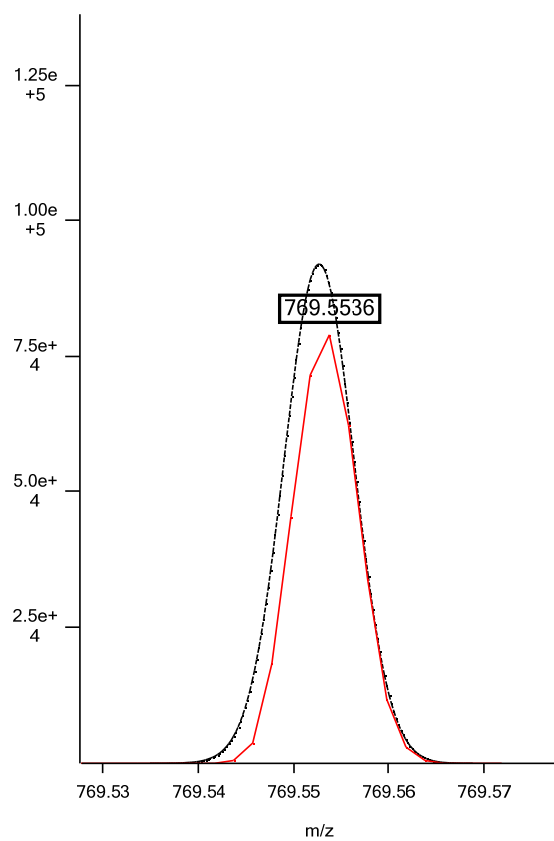

### Isotope 3

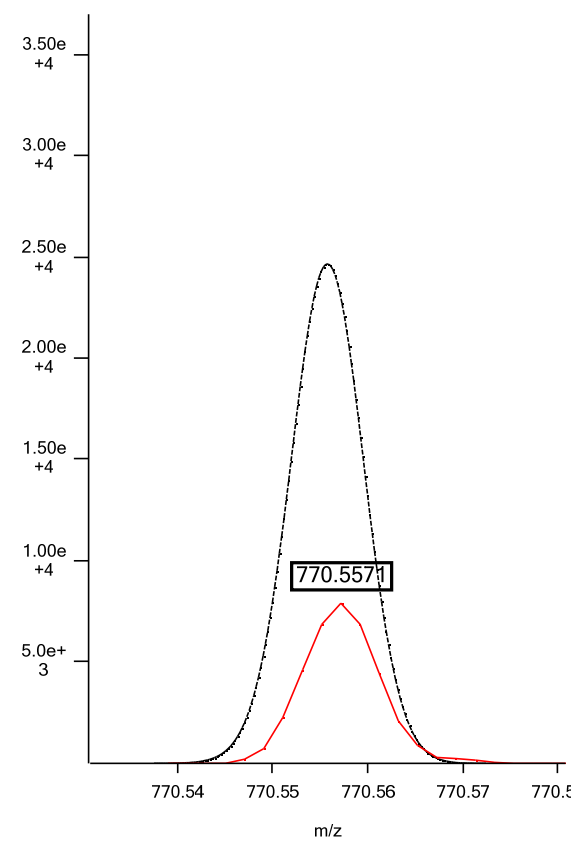

Positive ESI: PC 35:3; C<sub>43</sub>H<sub>81</sub>NO<sub>8</sub>P; theoretical  $m/z$  770.5699, (M+H)<sup>+</sup>; isotopic fit 0.0159

### Isotope 1

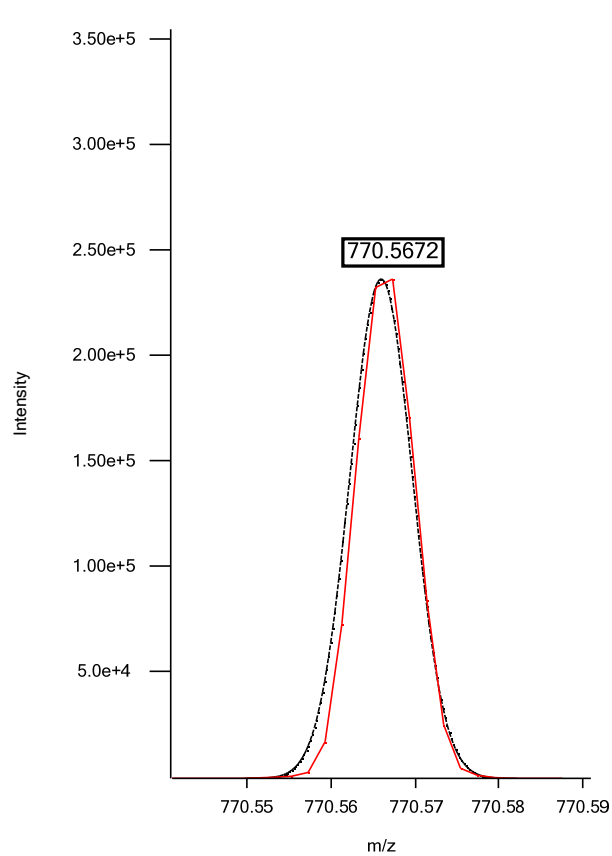

### Isotope 2

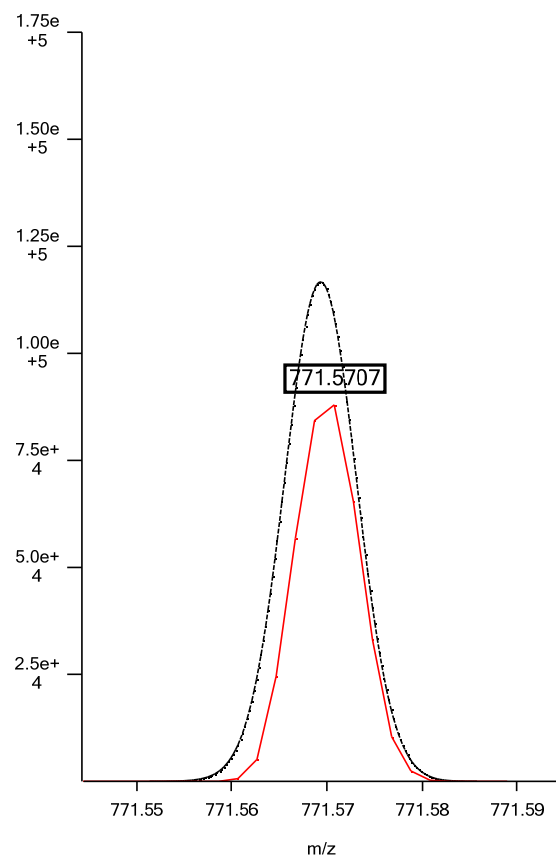

### Isotope 3

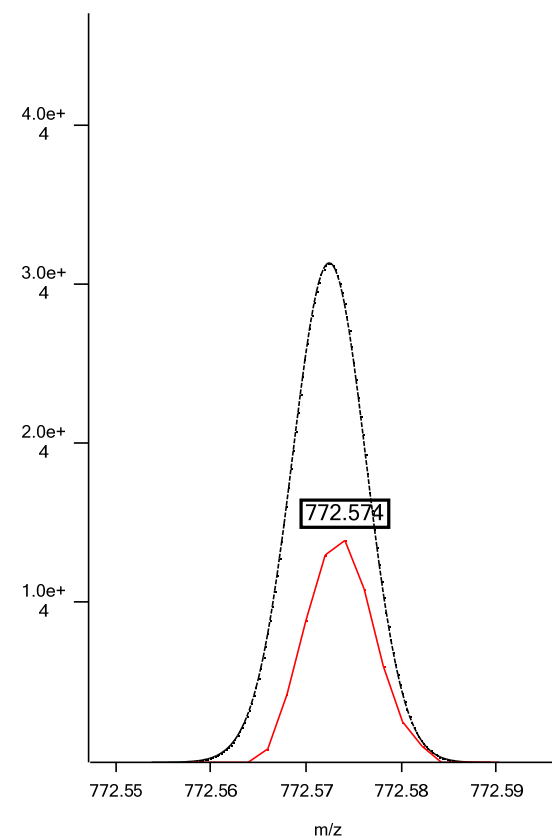

Positive ESI: PC 35:2; C<sub>43</sub>H<sub>83</sub>NO<sub>8</sub>P; theoretical  $m/z$  772.5856, (M+H)<sup>+</sup>; isotopic fit 0.0029

### Isotope 1

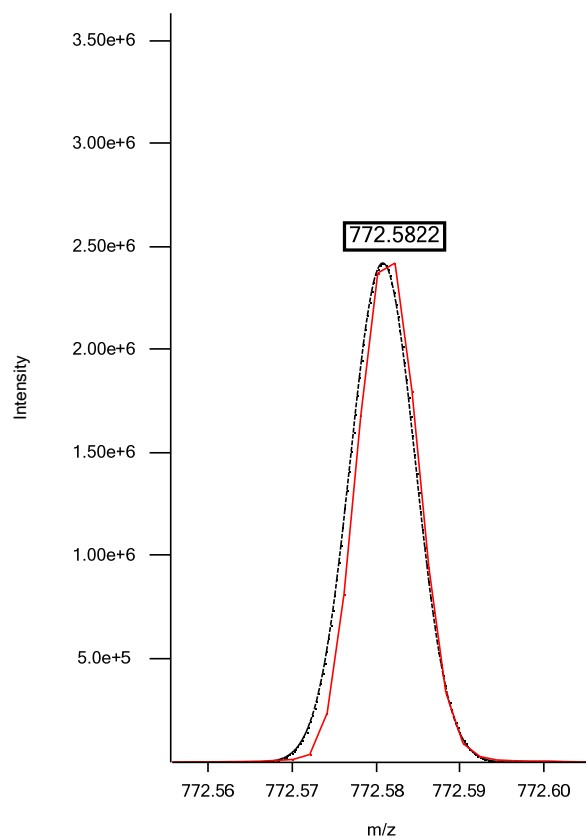

### Isotope 2

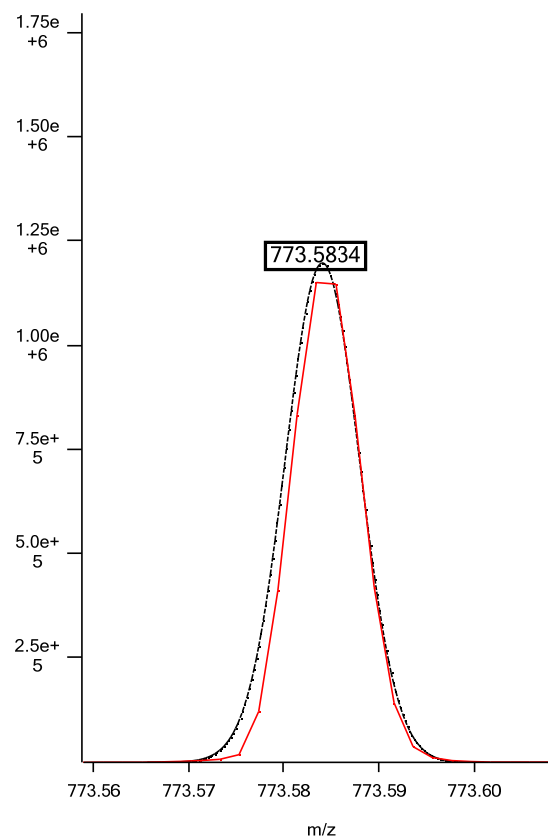

### Isotope 3

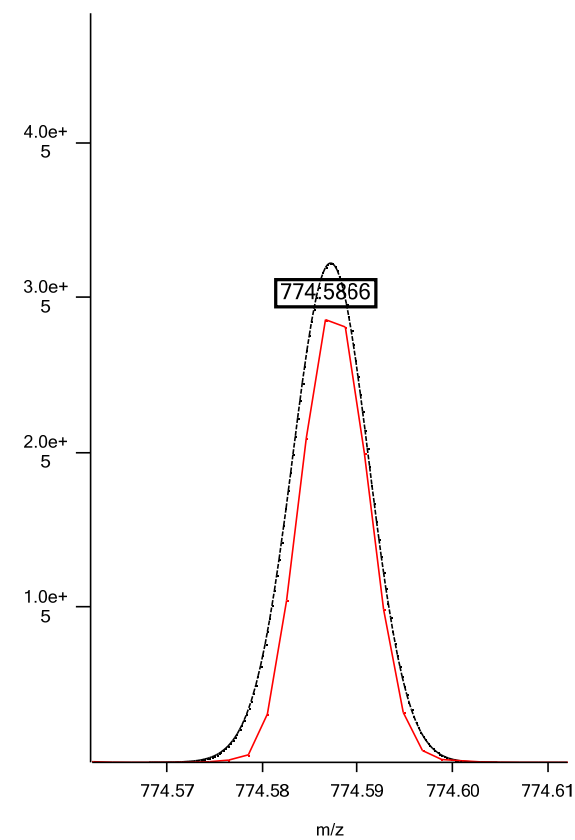

Positive ESI: PC 35:1; C<sub>43</sub>H<sub>85</sub>NO<sub>8</sub>P; theoretical *m/z* 774.6012, (M+H)<sup>+</sup>; isotopic fit 0.0037

### Isotope 1

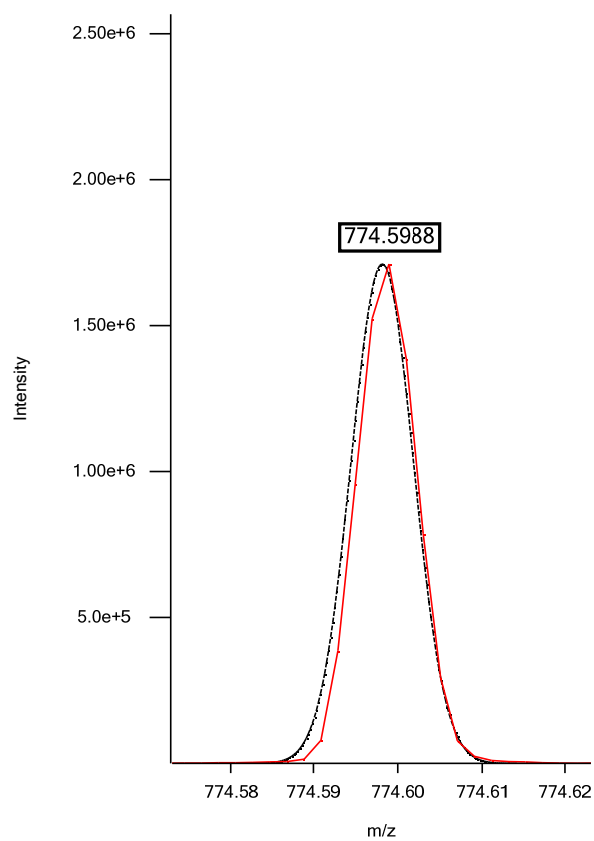

### Isotope 2

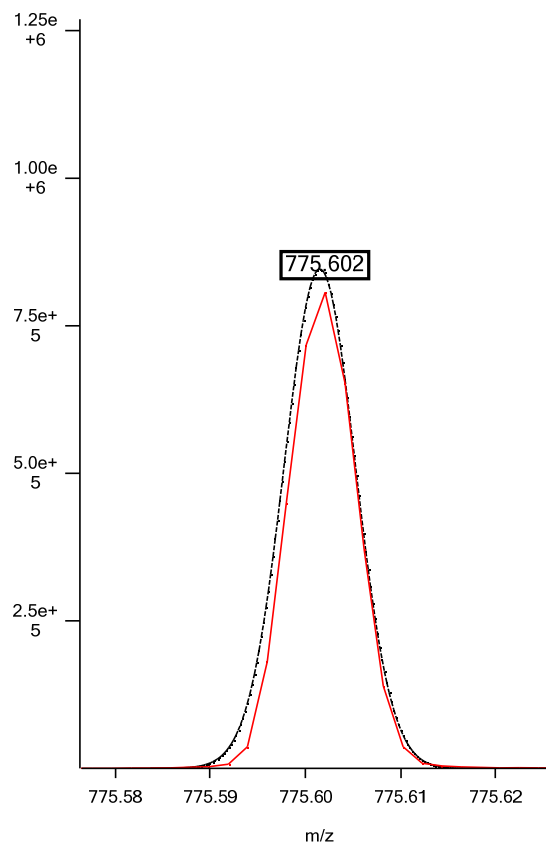

### Isotope 3

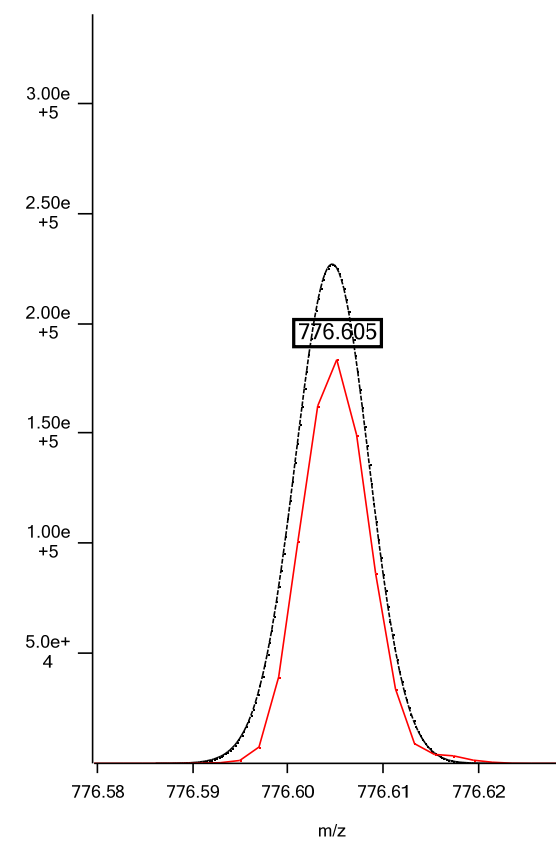

Positive ESI: PC 36:6; C<sub>44</sub>H<sub>77</sub>NO<sub>8</sub>P; theoretical  $m/z$  778.5387, (M+H)<sup>+</sup>; isotopic fit 0.0379

### Isotope 1

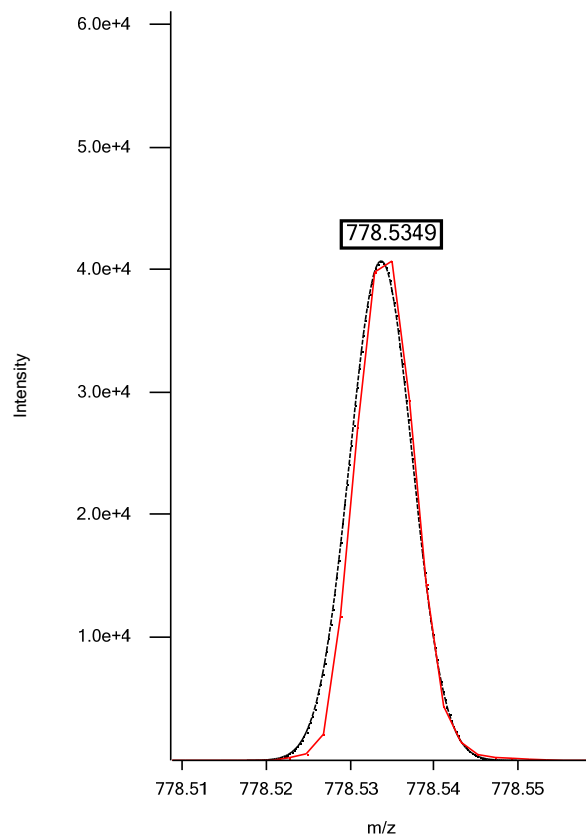

### Isotope 2

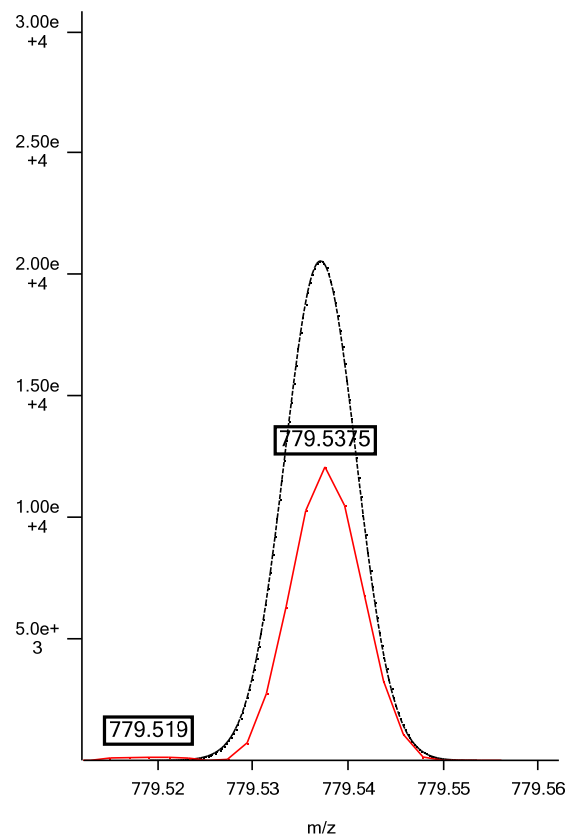

### Isotope 3

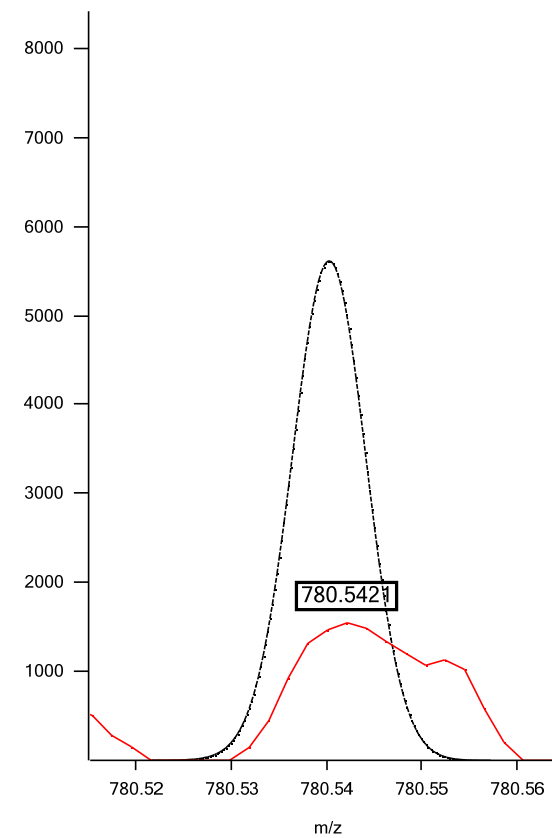



Positive ESI: PC 36:5; C<sub>44</sub>H<sub>79</sub>NO<sub>8</sub>P; theoretical  $m/z$  780.5543, (M+H)<sup>+</sup>; isotopic fit 0.0051

### Isotope 1

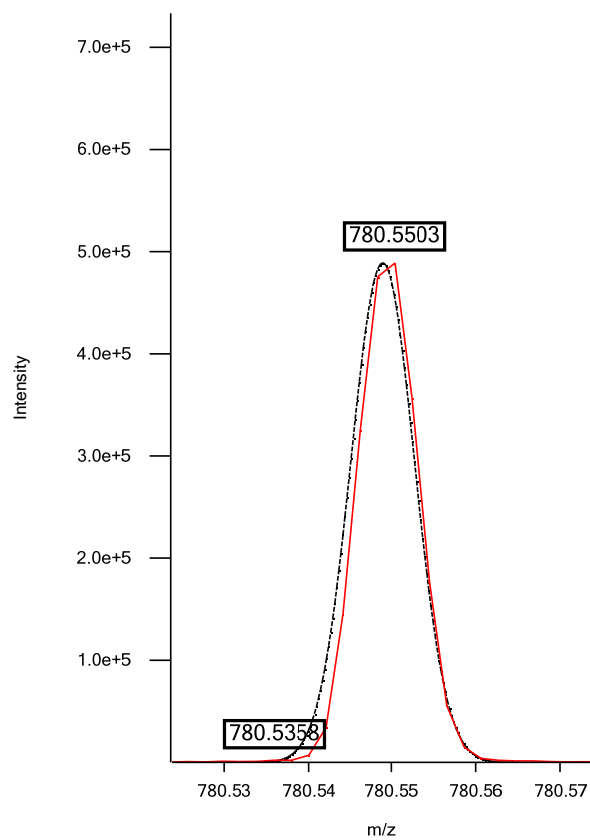

### Isotope 2

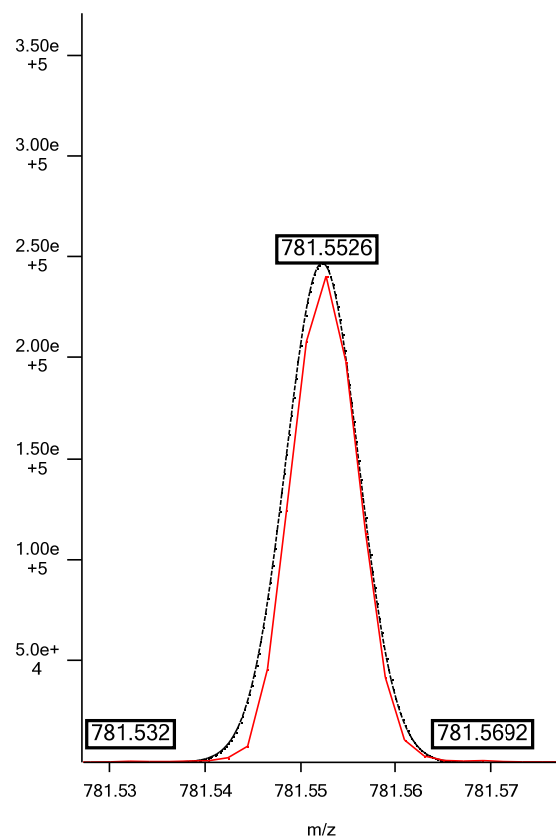

### Isotope 3

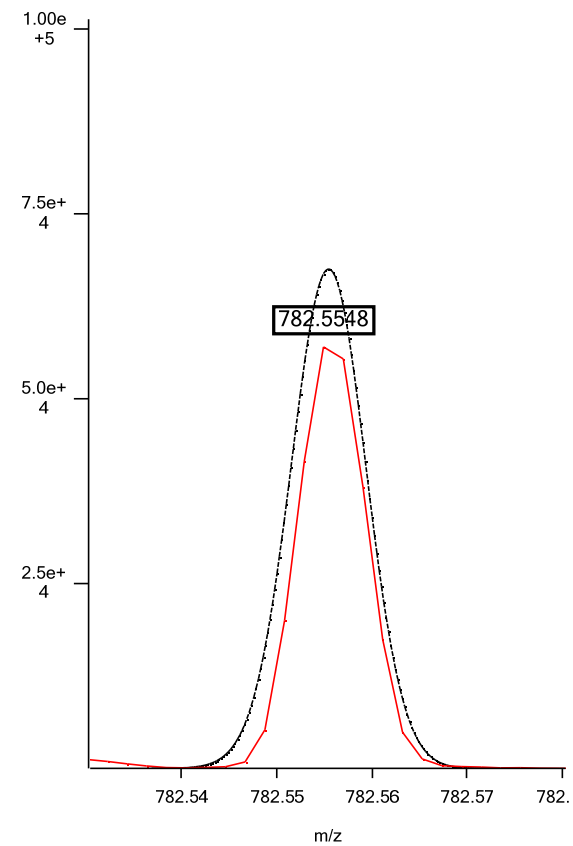

Positive ESI: PC 16:1p/20:4 or 16:0e/20:5; C<sub>44</sub>H<sub>81</sub>NO<sub>7</sub>P; theoretical *m/z* 766.5750, (M+H)<sup>+</sup>; isotopic fit 0.0098

### Isotope 1

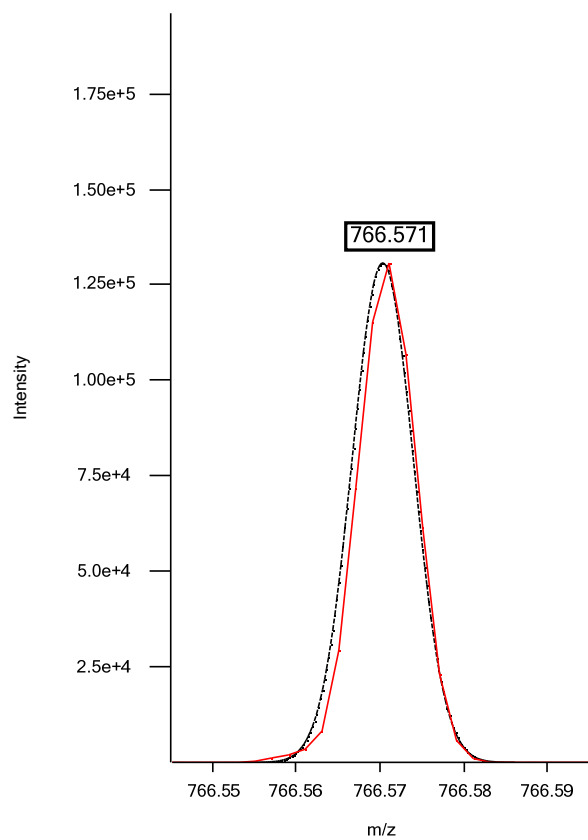

### Isotope 2

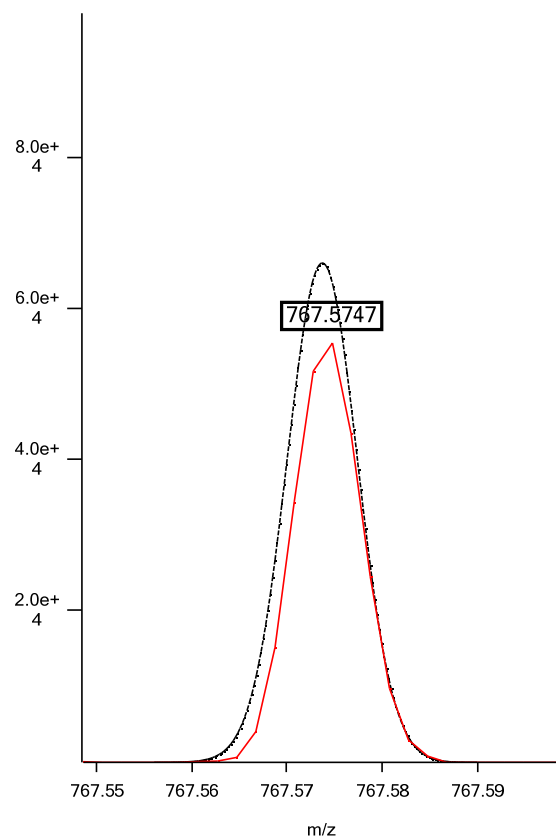

### Isotope 3

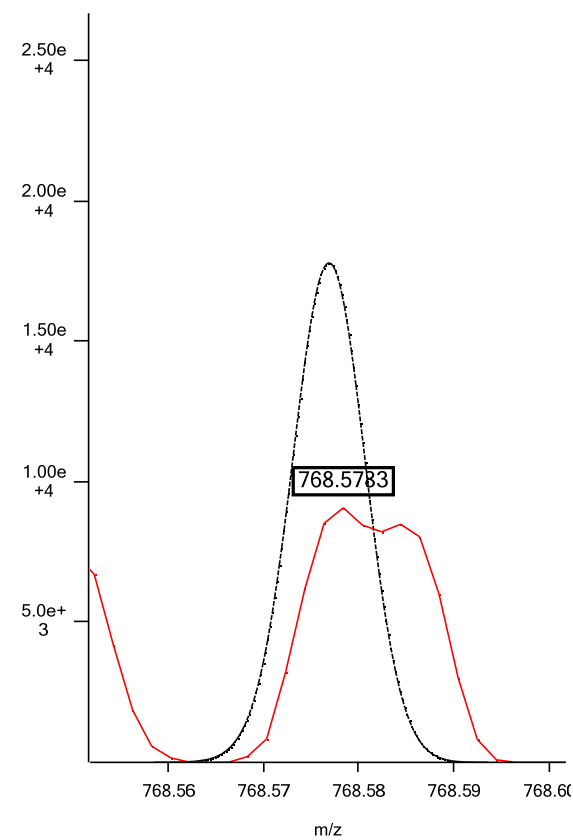

Positive ESI: PC 36:4; C<sub>44</sub>H<sub>81</sub>NO<sub>8</sub>P; theoretical  $m/z$  782.5699, (M+H)<sup>+</sup>; isotopic fit 0.0070

### Isotope 1

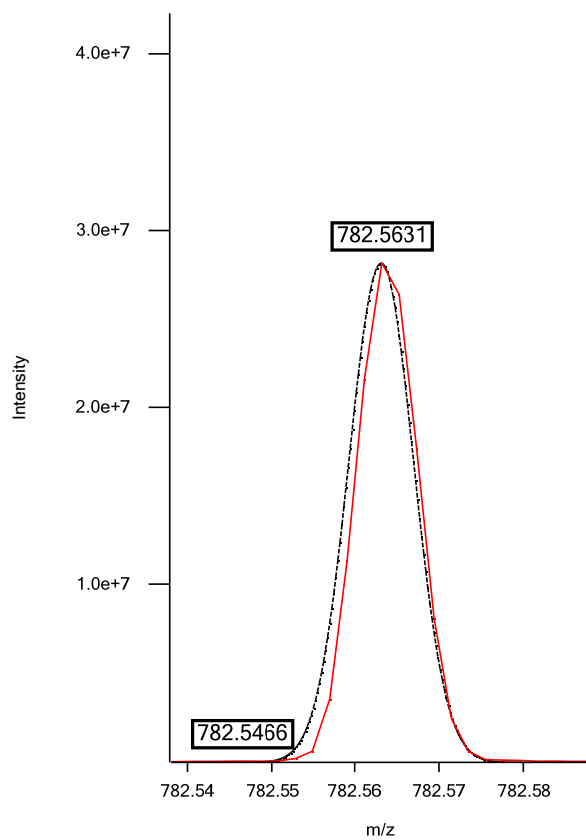

### Isotope 2

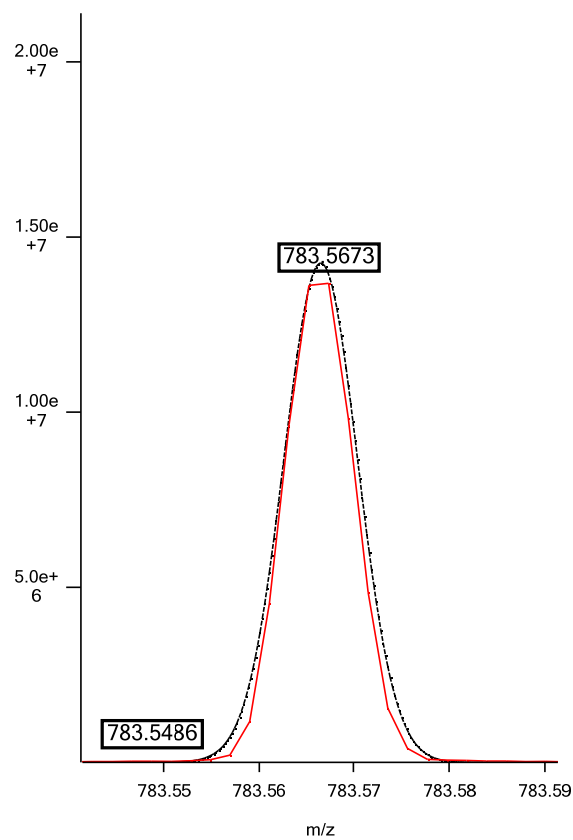

### Isotope 3

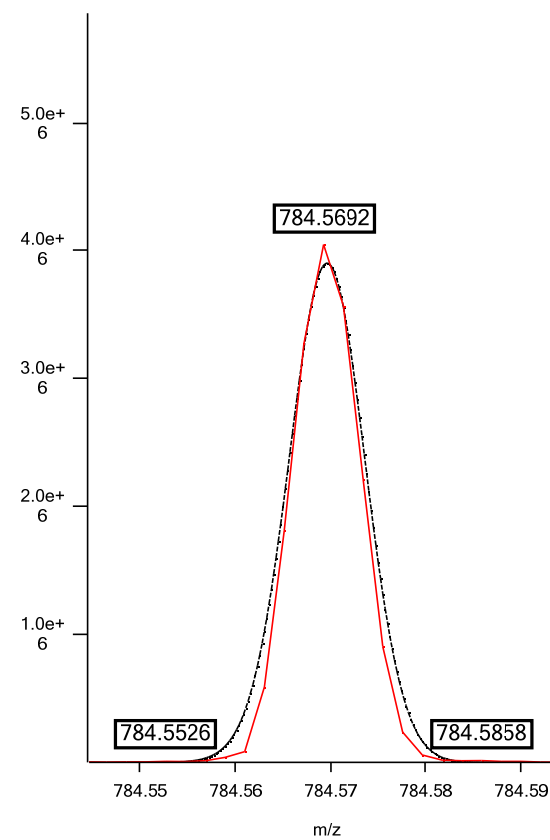

Negative ESI: Oxidized PC 16:0/Hydroxy-18:3;  $C_{44}H_{81}NO_{11}P$ ; theoretical  $m/z$  830.5547, (M-H)<sup>-</sup>; isotopic fit 0.0046

### Isotope 1

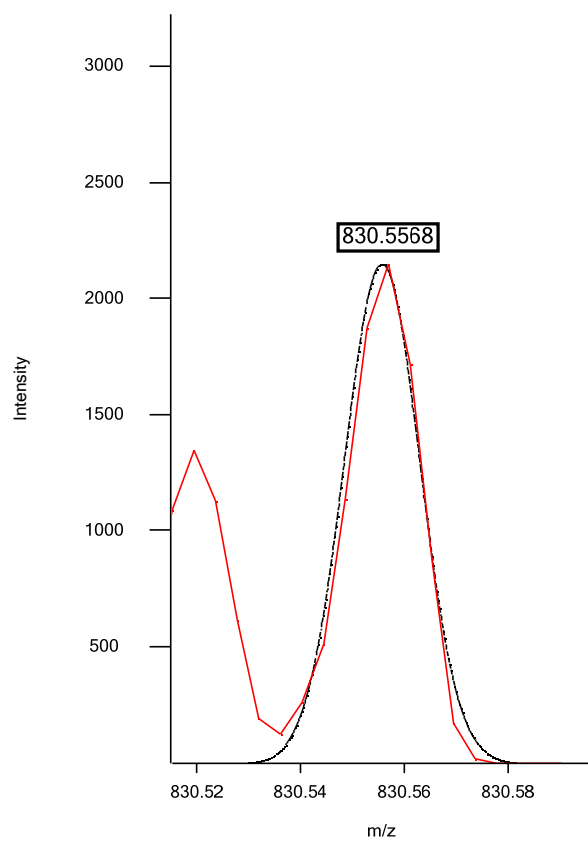

### Isotope 2

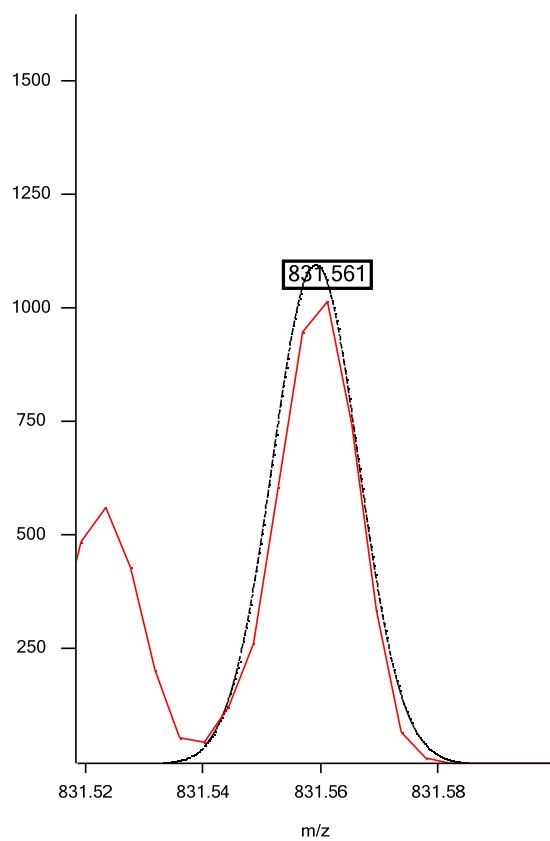

### Isotope 3

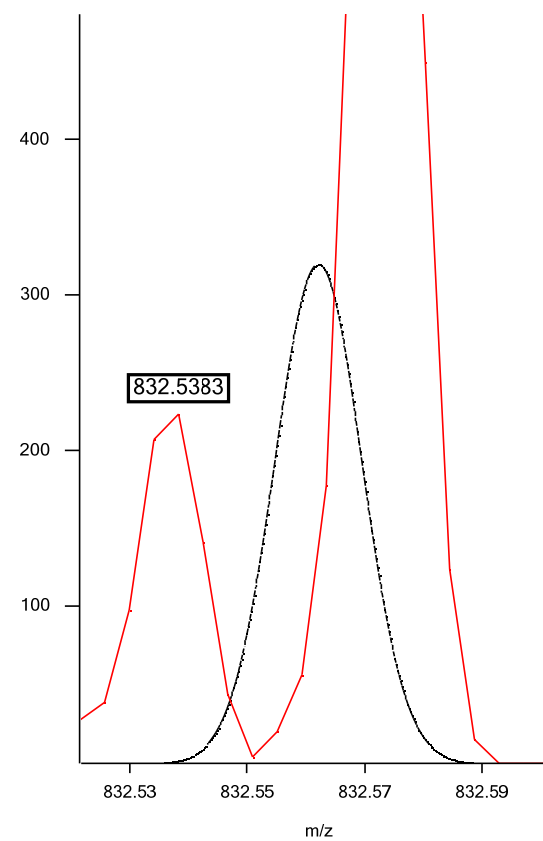

Positive ESI: PC 16:1p/20:3 or 16:0e/20:4; C<sub>44</sub>H<sub>83</sub>NO<sub>7</sub>P; theoretical *m/z* 768.5907, (M+H)<sup>+</sup>; isotopic fit 0.0062

### Isotope 1

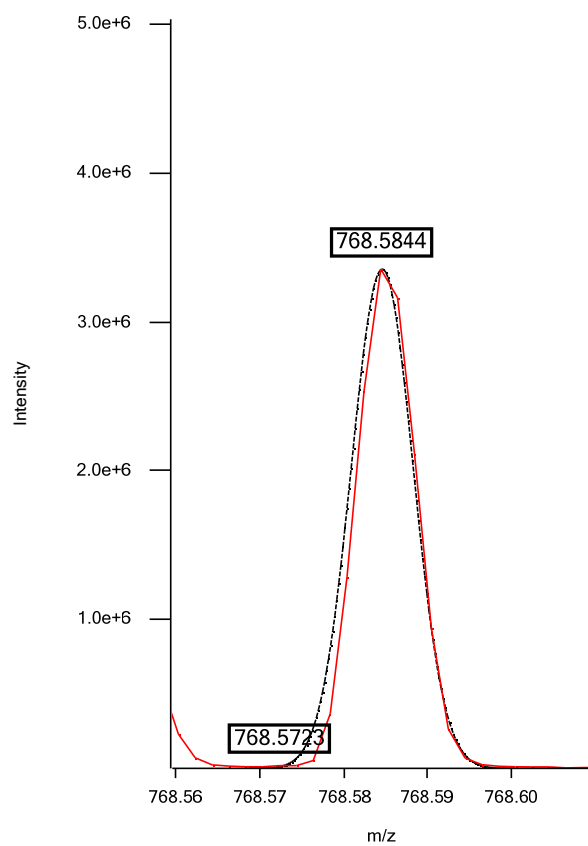

### Isotope 2

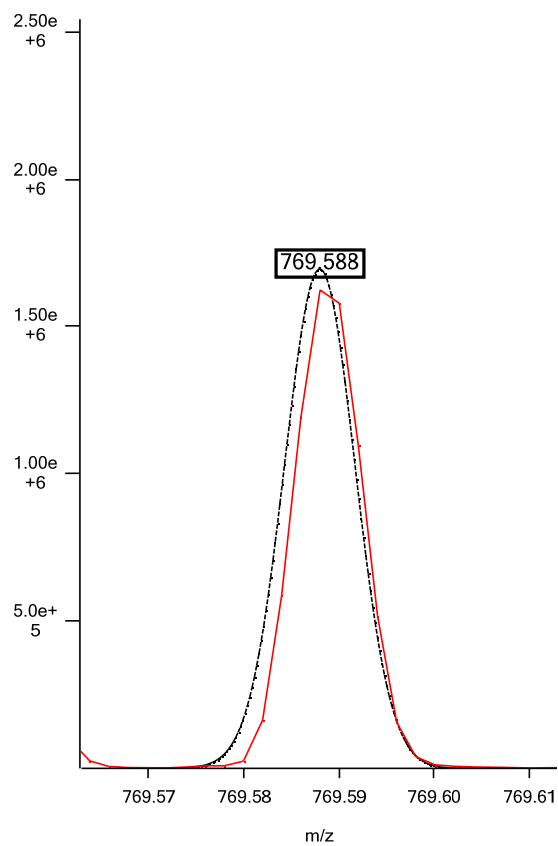

### Isotope 3

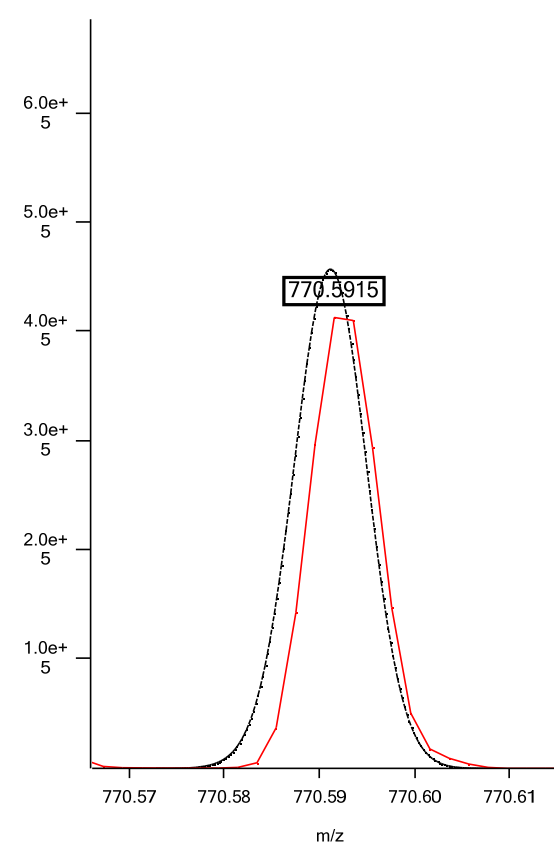

Positive ESI: PC 36:3; C<sub>44</sub>H<sub>83</sub>NO<sub>8</sub>P; theoretical  $m/z$  784.5856, (M+H)<sup>+</sup>; isotopic fit 0.0080

### Isotope 1

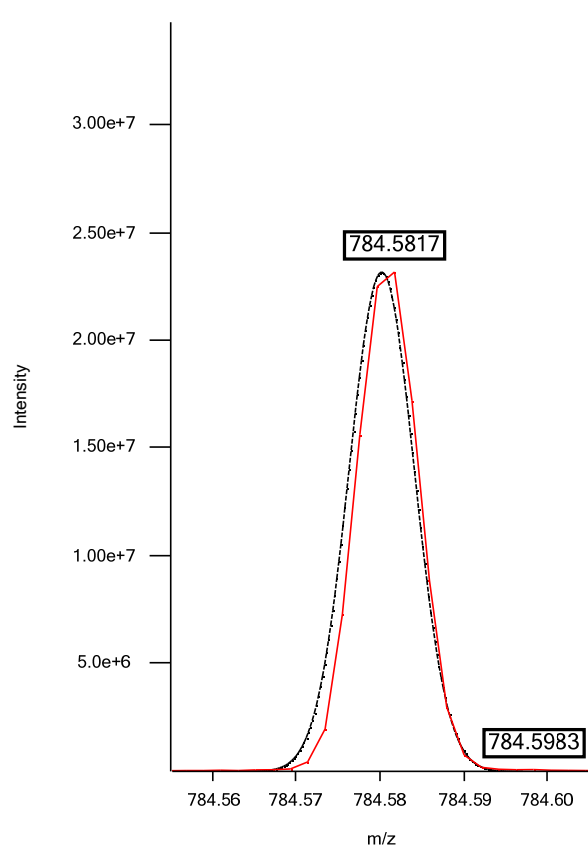

### Isotope 2

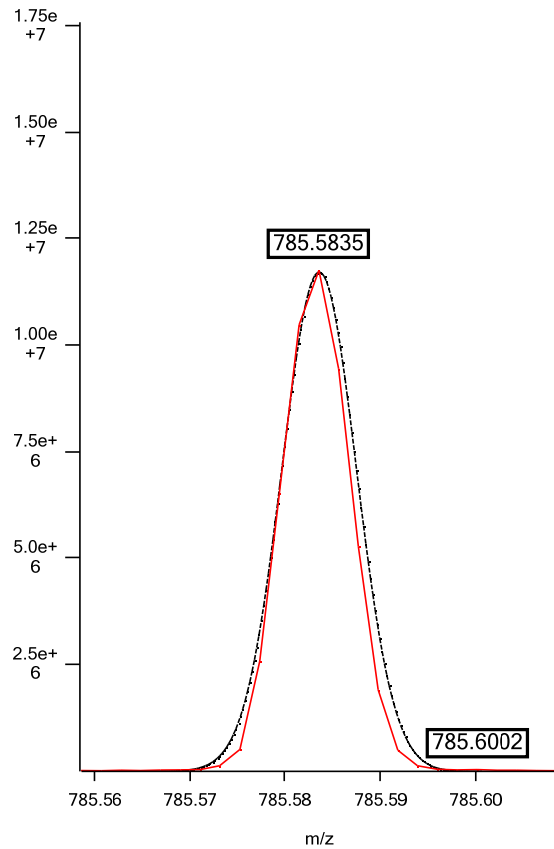

### Isotope 3

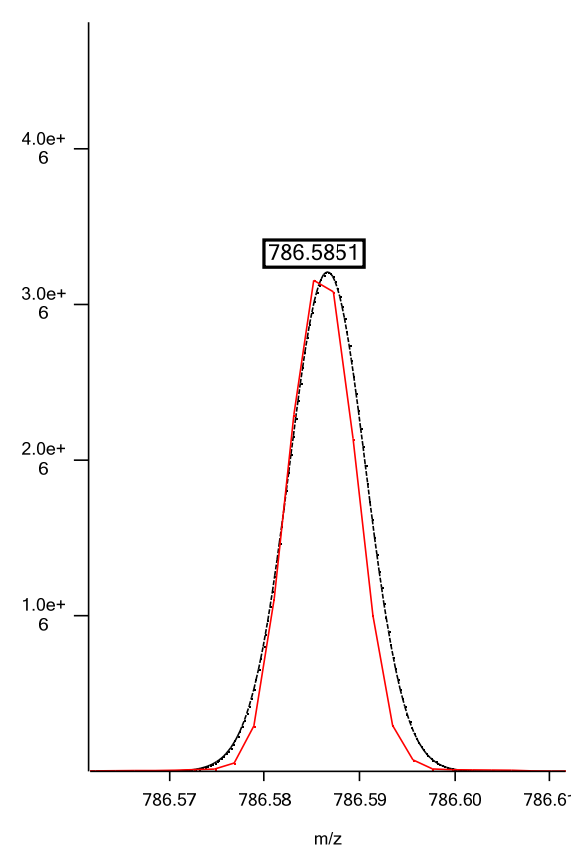

Positive ESI: Oxidized PC 18:0/Hydroxy-18:3;  $C_{44}H_{83}NO_9P$ ; theoretical  $m/z$  800.5805,  $(M+H)^+$ ; isotopic fit 0.0350

### Isotope 1

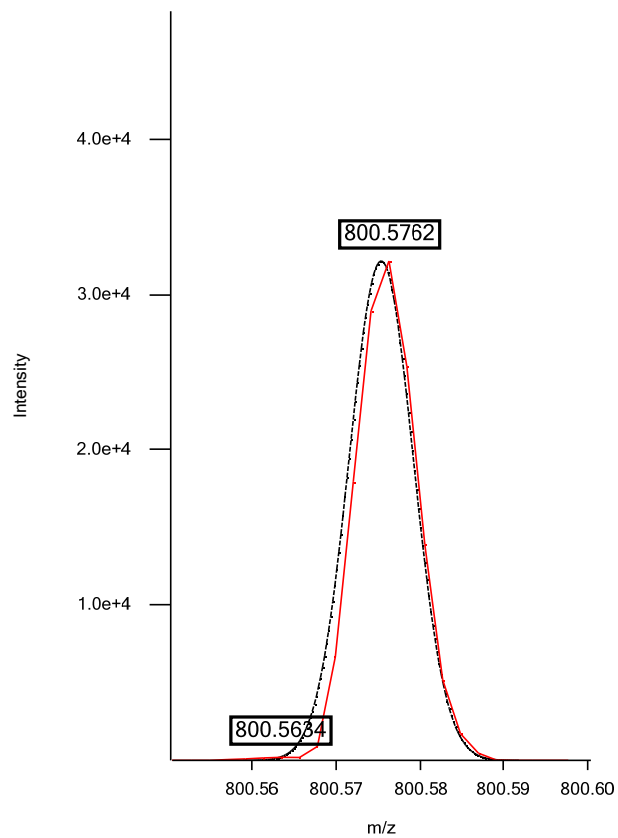

### Isotope 2

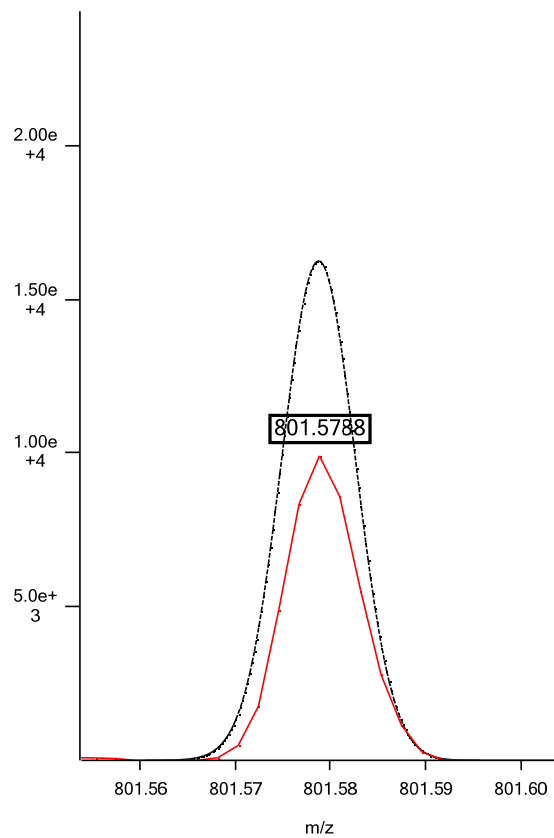

### Isotope 3

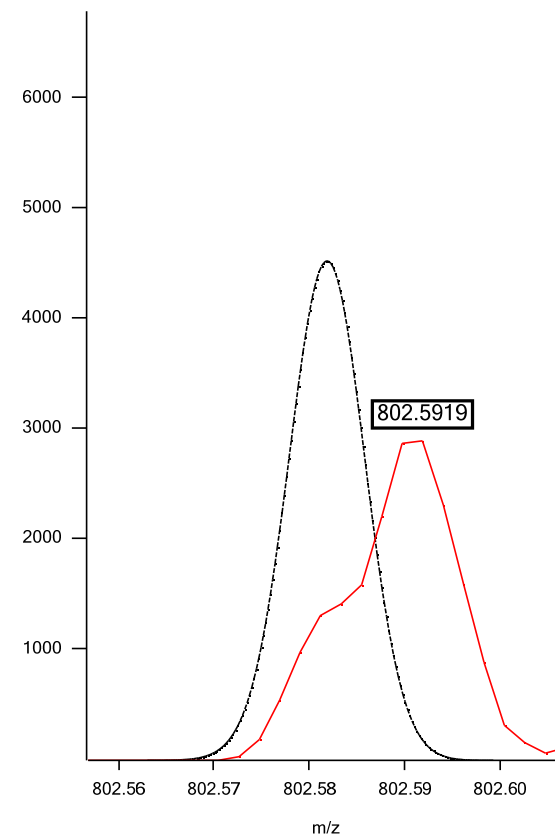

Negative ESI: Oxidized PC 16:0/Hydroperoxy-18:2;  $C_{44}H_{83}NO_{12}P$ ; theoretical  $m/z$  848.5653, (M-H)<sup>-</sup>; isotopic fit 0.0041

### Isotope 1

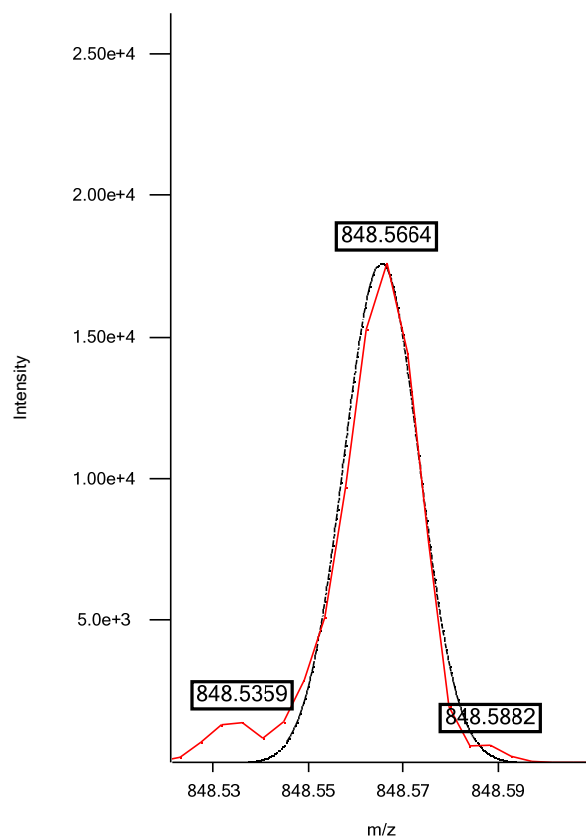

### Isotope 2

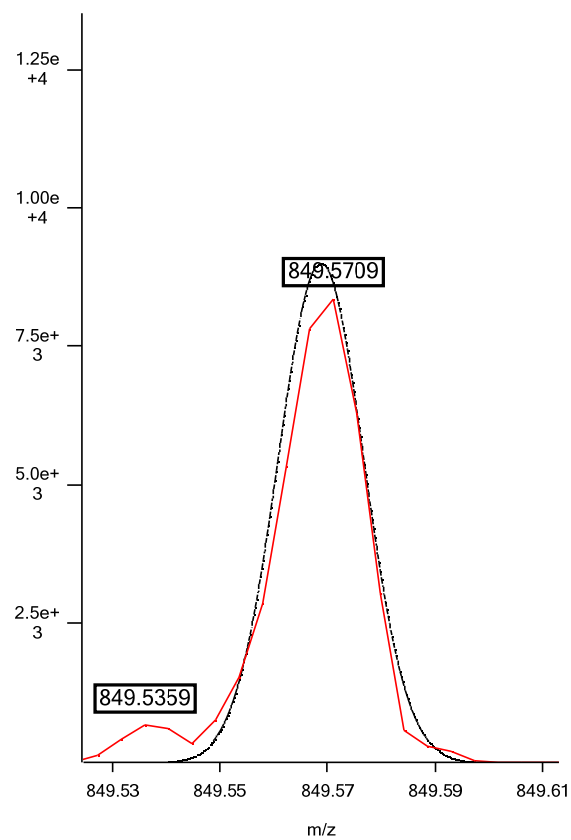

### Isotope 3

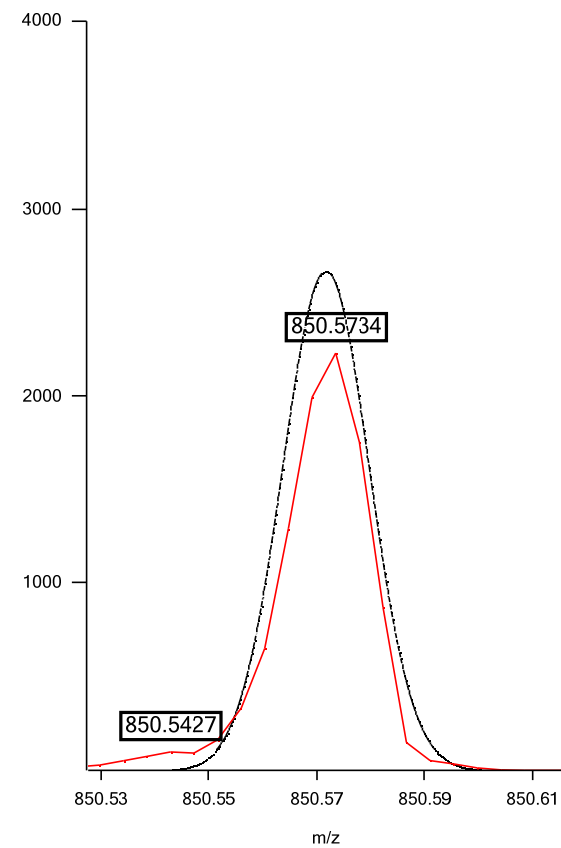



Negative ESI: Oxidized PC 16:0/Hydroxy-18:2;  $C_{44}H_{83}NO_{11}P$ ; theoretical  $m/z$  832.5703, (M-H)<sup>-</sup>; isotopic fit 0.0067

### Isotope 1

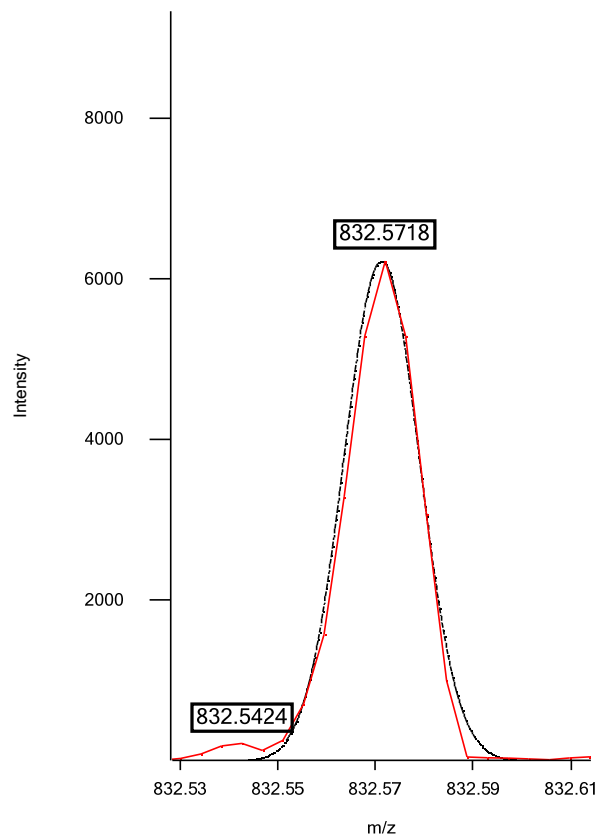

### Isotope 2

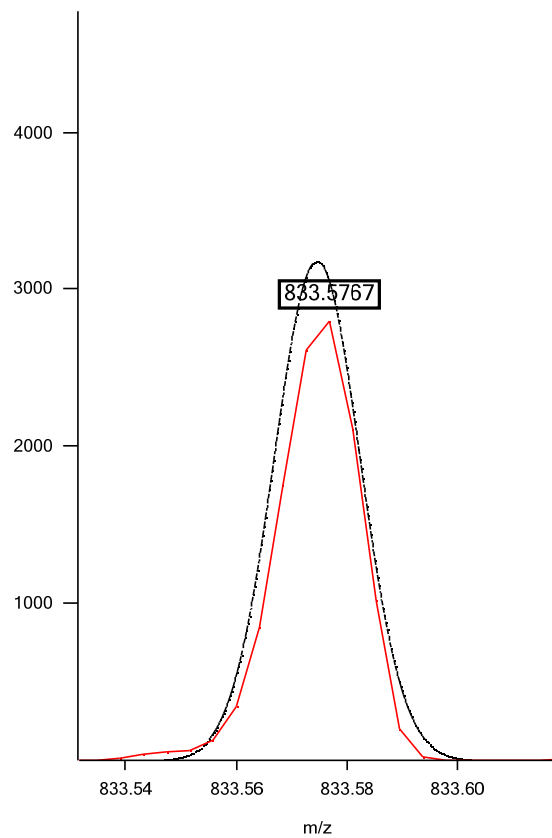

### Isotope 3

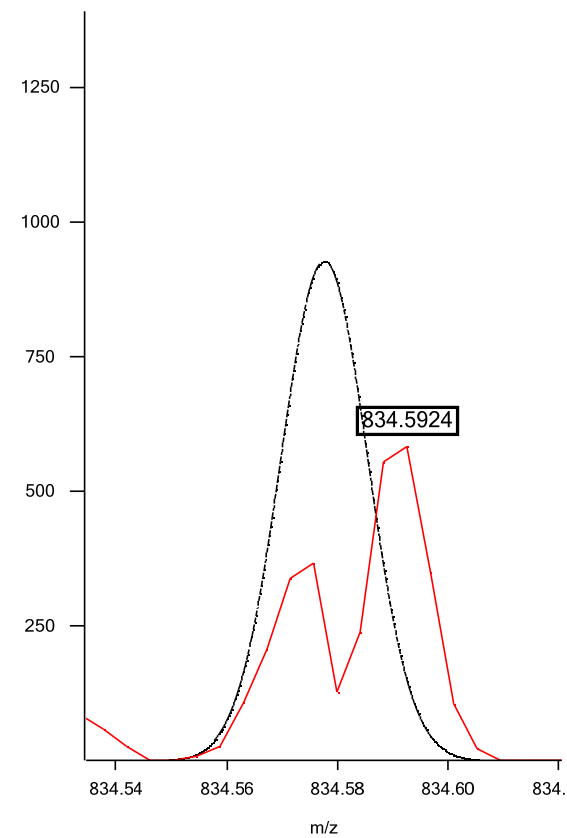

Positive ESI: PC 16:1p/20:2 or 16:0e/20:3;  $C_{44}H_{85}NO_7P$ ; theoretical  $m/z$  770.6063, (M+H)<sup>+</sup>; isotopic fit 0.0125

### Isotope 1

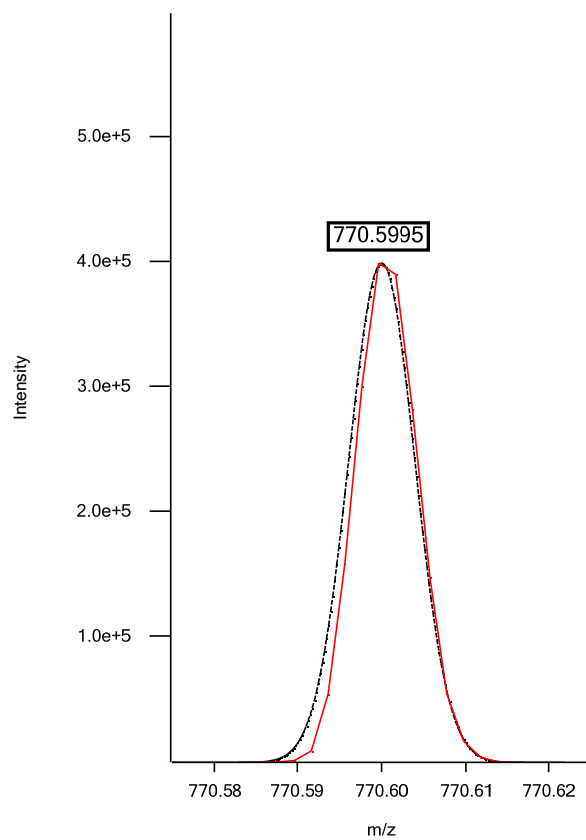

### Isotope 2

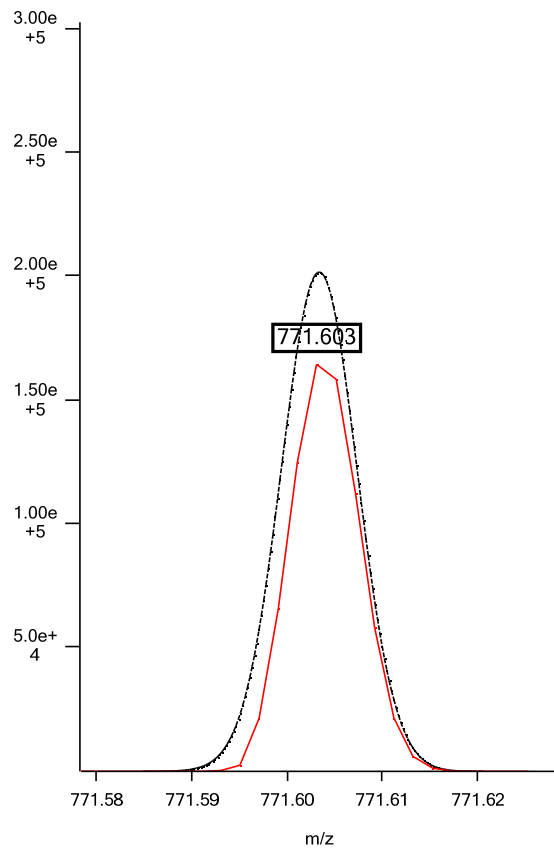

### Isotope 3

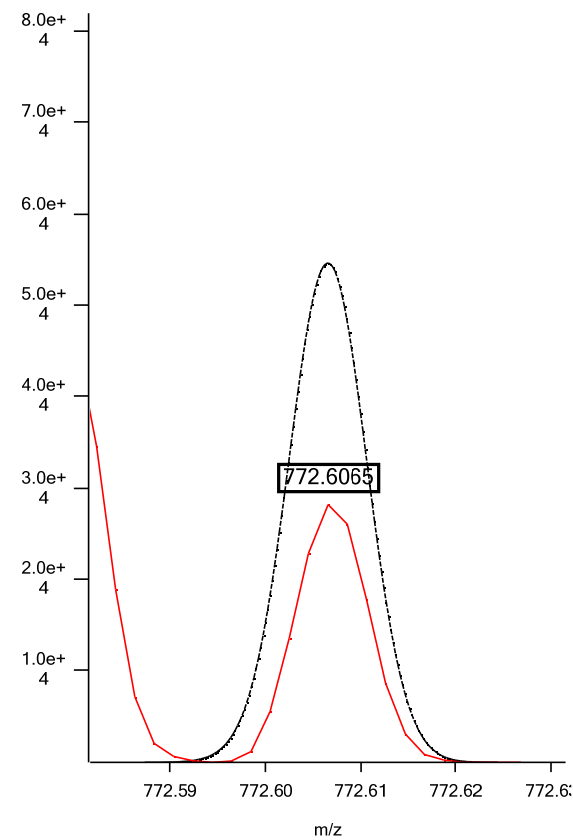

Positive ESI: PC 36:2; C<sub>44</sub>H<sub>85</sub>NO<sub>8</sub>P; theoretical  $m/z$  786.6013, (M+H)<sup>+</sup>; isotopic fit 0.0114

### Isotope 1

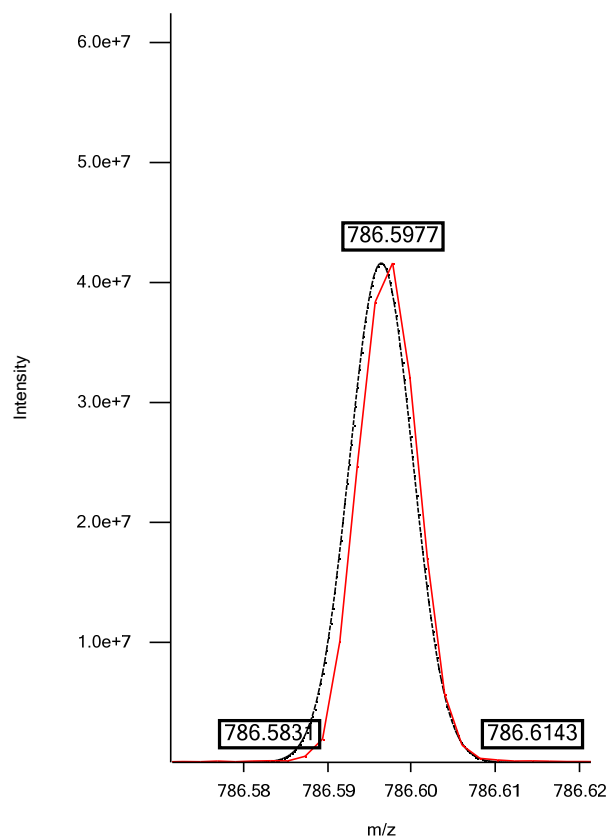

### Isotope 2

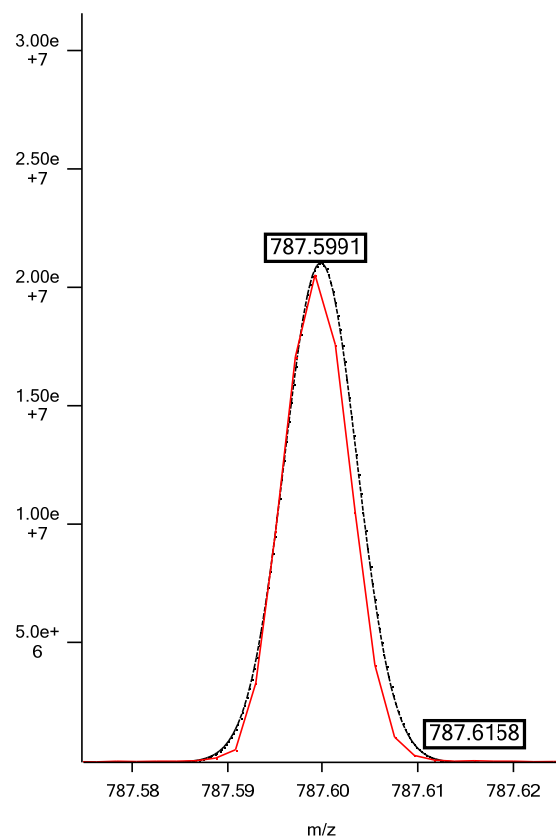

### Isotope 3

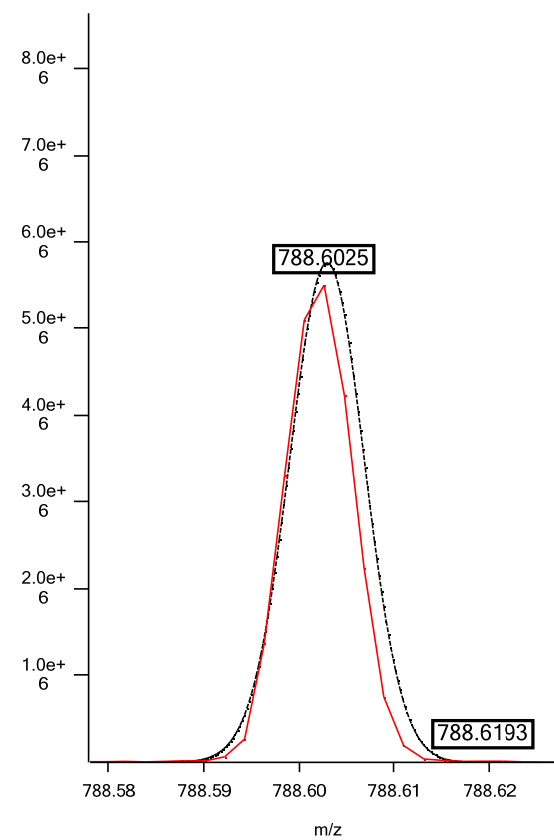

Negative ESI: Oxidized PC 18:0/Hydroxy-16:1 or 16:0/Hydroxy-18:1;  $C_{44}H_{85}NO_{11}P$ ; theoretical  $m/z$  834.5860, (M-H)<sup>-</sup>; isotopic fit 0.0025

### Isotope 1

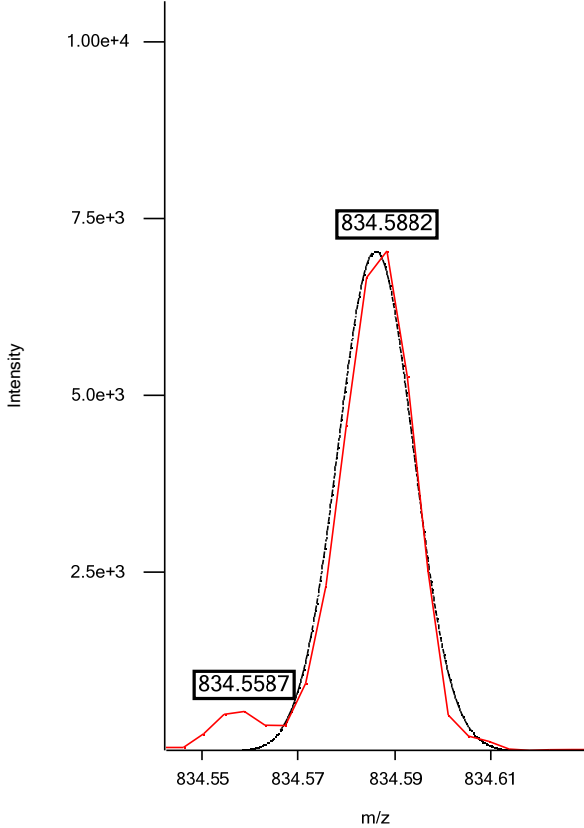

### Isotope 2

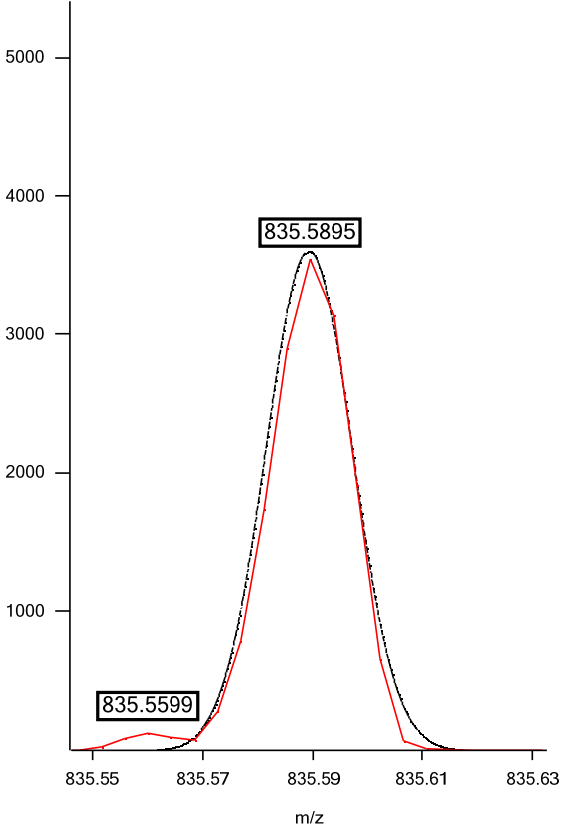

### Isotope 3

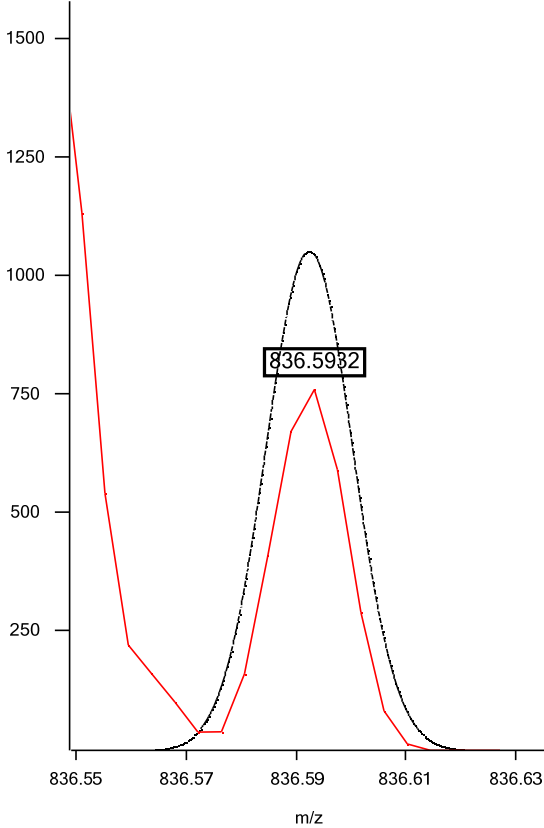

Positive ESI: PC 16:1p/20:1 or 16:0e/20:2;  $C_{44}H_{87}NO_7P$ ; theoretical  $m/z$  772.6220,  $(M+H)^+$ ; isotopic fit 0.0036

### Isotope 1

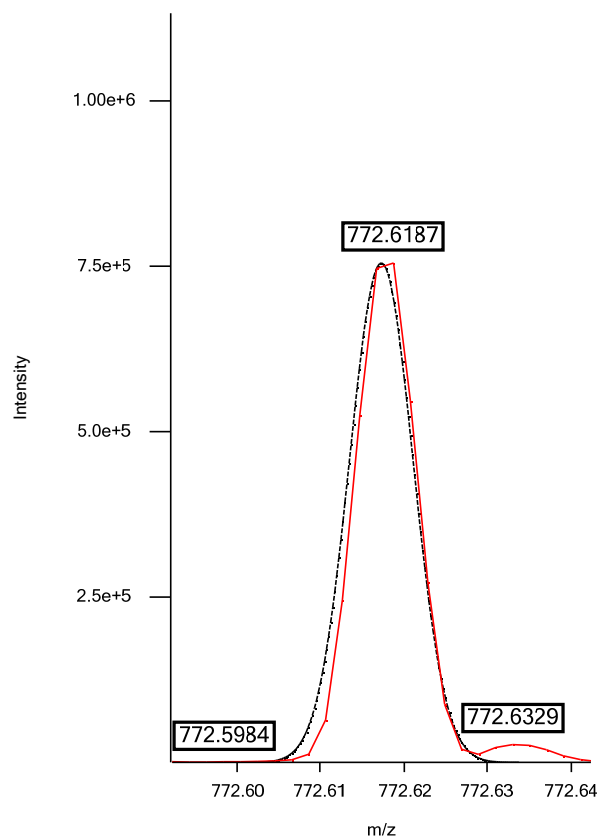

### Isotope 2

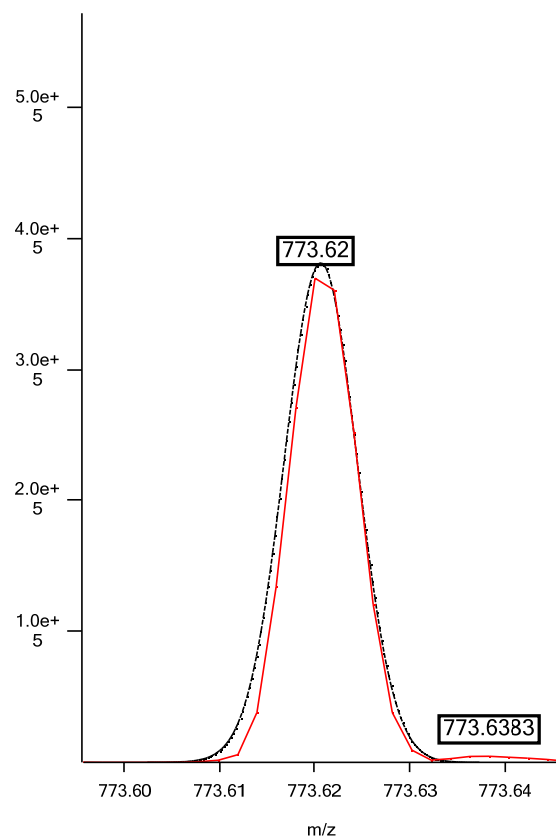

### Isotope 3

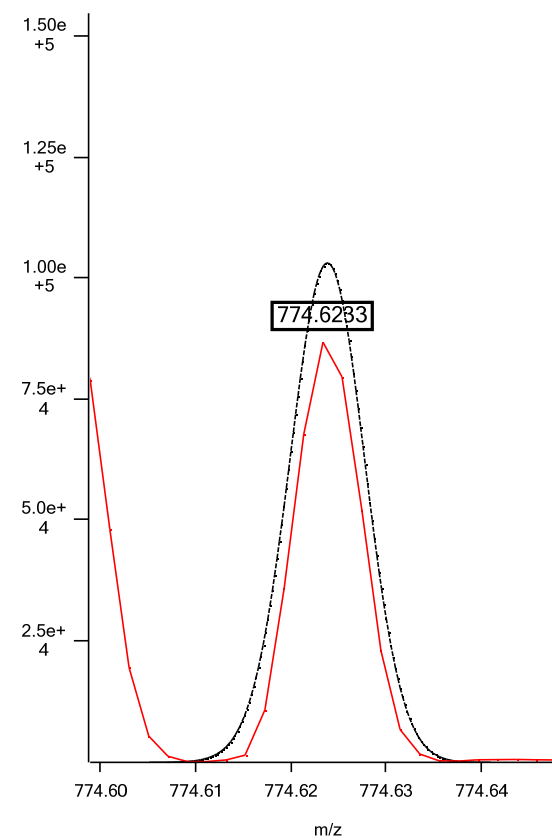

Positive ESI: PC 36:1; C<sub>44</sub>H<sub>87</sub>NO<sub>8</sub>P; theoretical  $m/z$  788.6169, (M+H)<sup>+</sup>; isotopic fit 0.0112

### Isotope 1

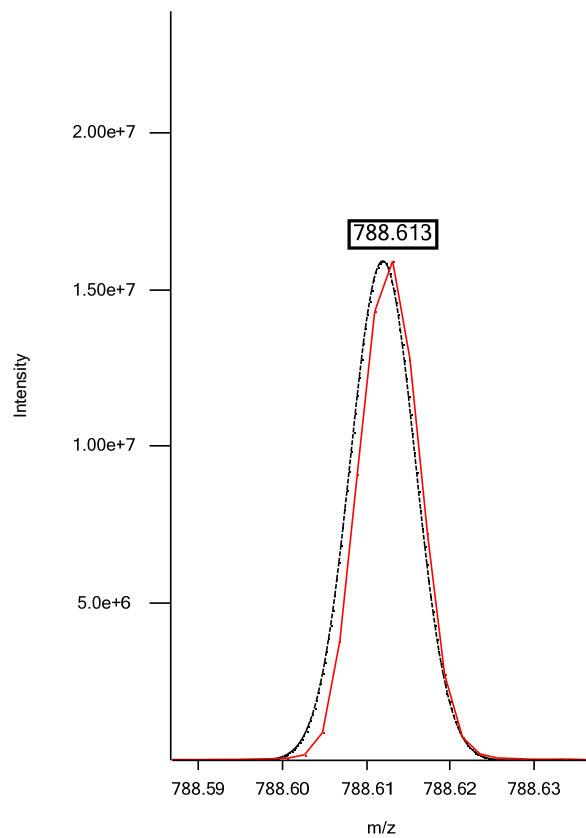

### Isotope 2

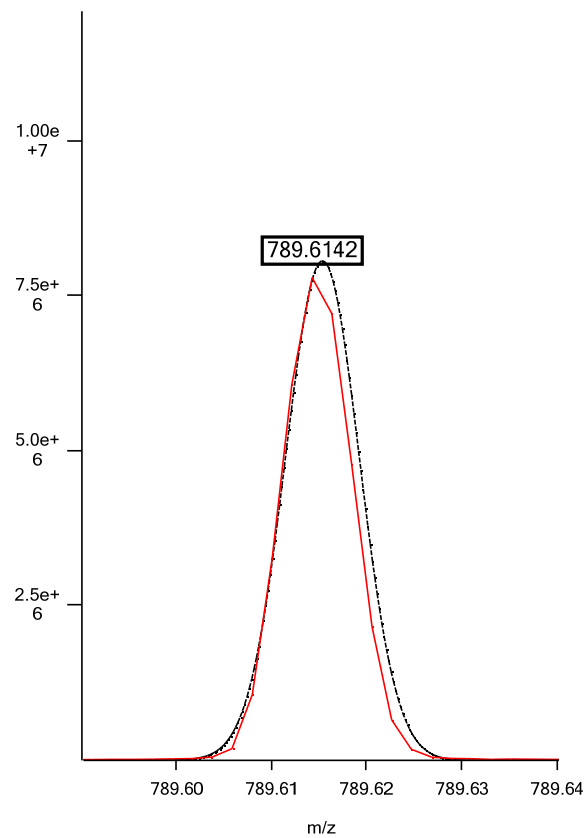

### Isotope 3

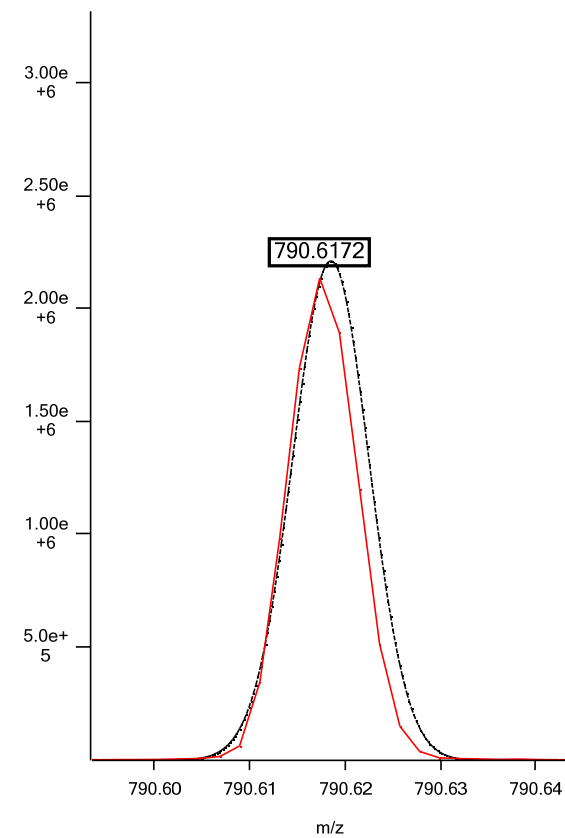

Positive ESI: PC 16:1p/20:0 or 16:0e/20:0;  $C_{44}H_{89}NO_7P$ ; theoretical  $m/z$  774.6376,  $(M+H)^+$ ; isotopic fit 0.0190

### Isotope 1

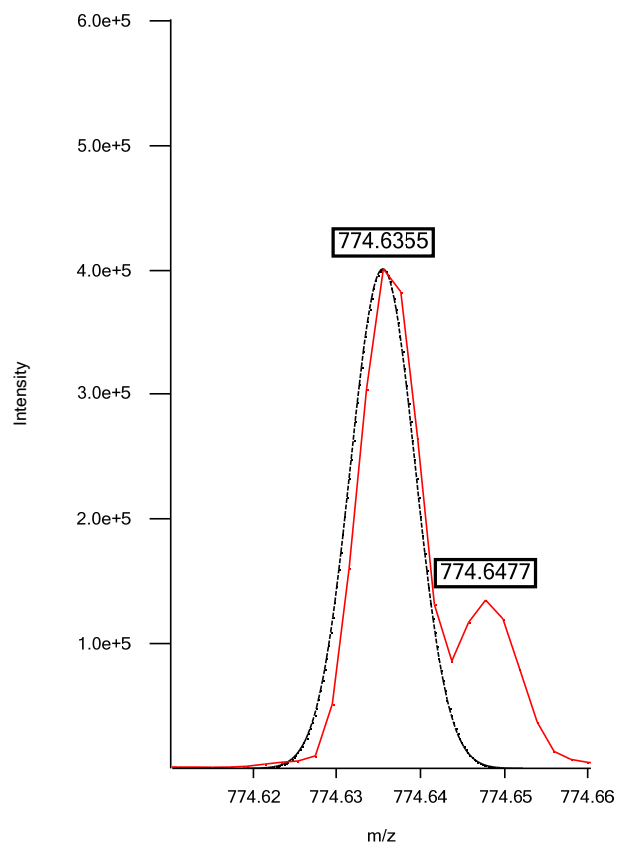

### Isotope 2

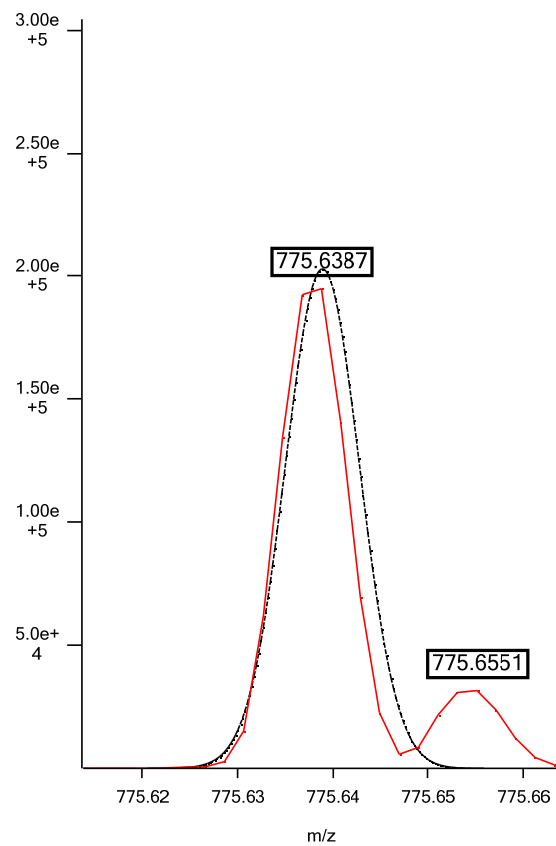

### Isotope 3

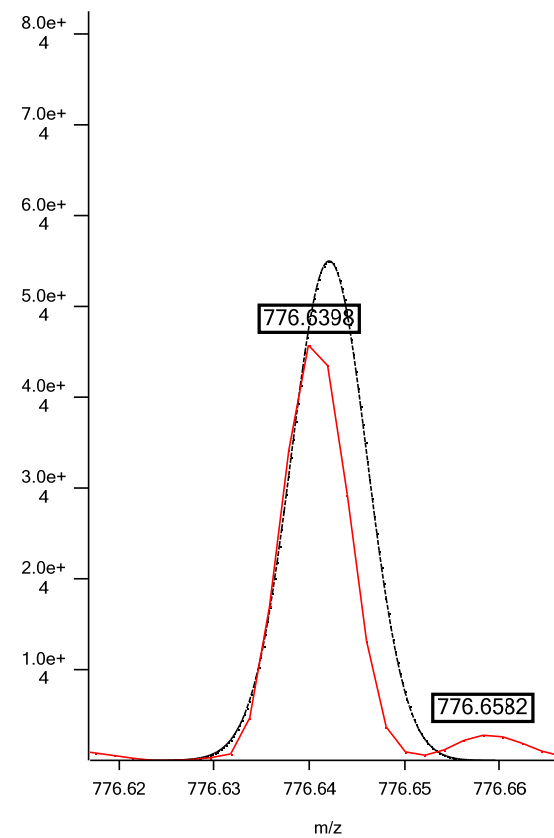

Positive ESI: PC 36:0; C<sub>44</sub>H<sub>89</sub>NO<sub>8</sub>P; theoretical  $m/z$  790.6325, (M+H)<sup>+</sup>; isotopic fit 0.0053

### Isotope 1

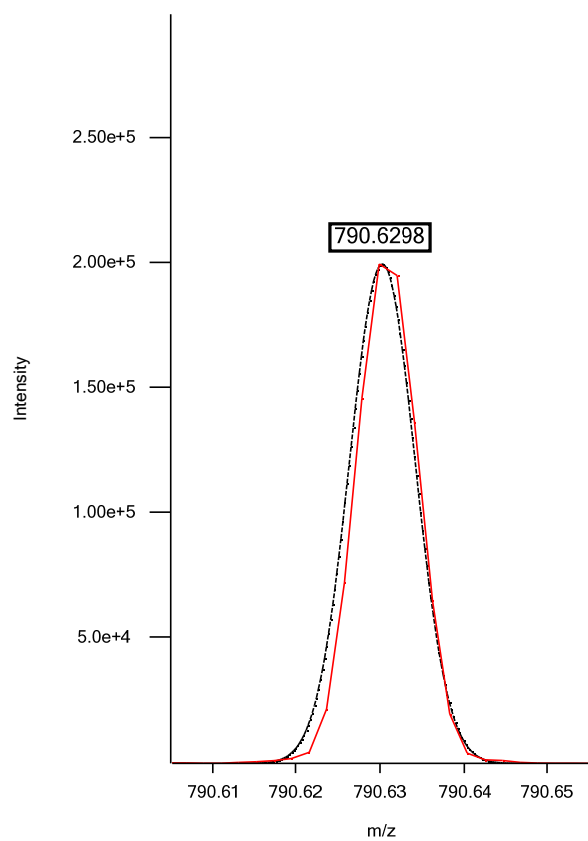

### Isotope 2

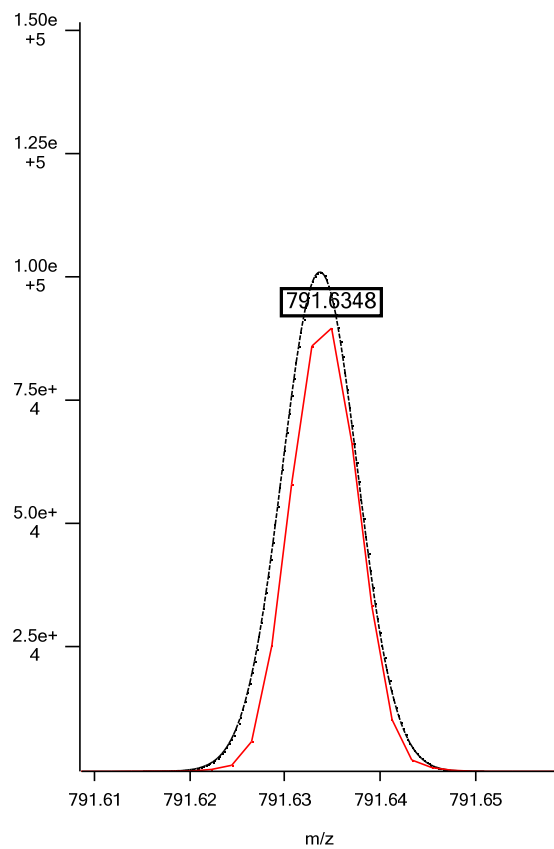

### Isotope 3

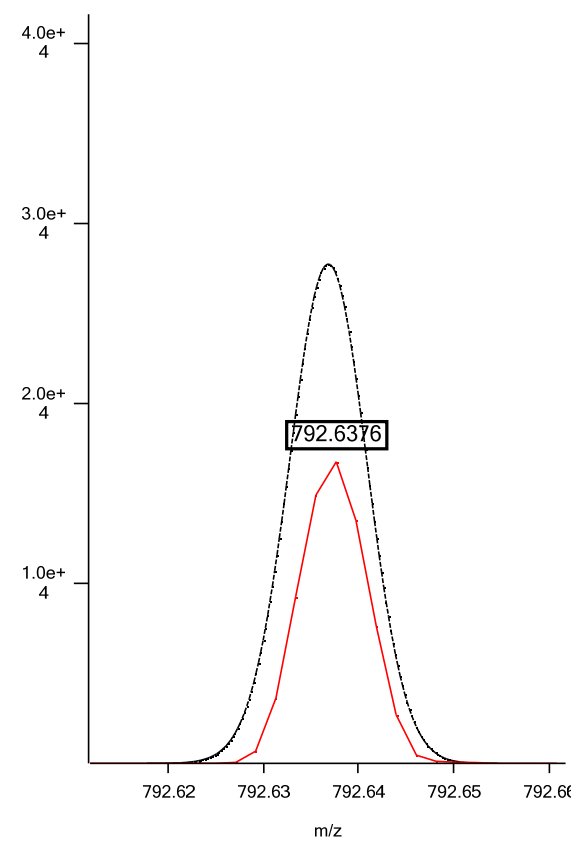



Positive ESI: PC 37:4; C<sub>45</sub>H<sub>83</sub>NO<sub>8</sub>P; theoretical  $m/z$  796.5856, (M+H)<sup>+</sup>; isotopic fit 0.0043

### Isotope 1

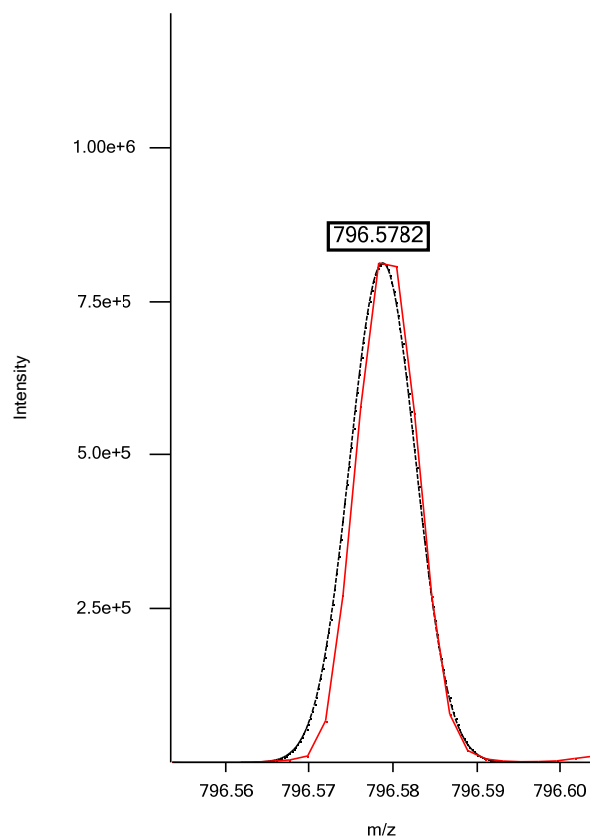

### Isotope 2

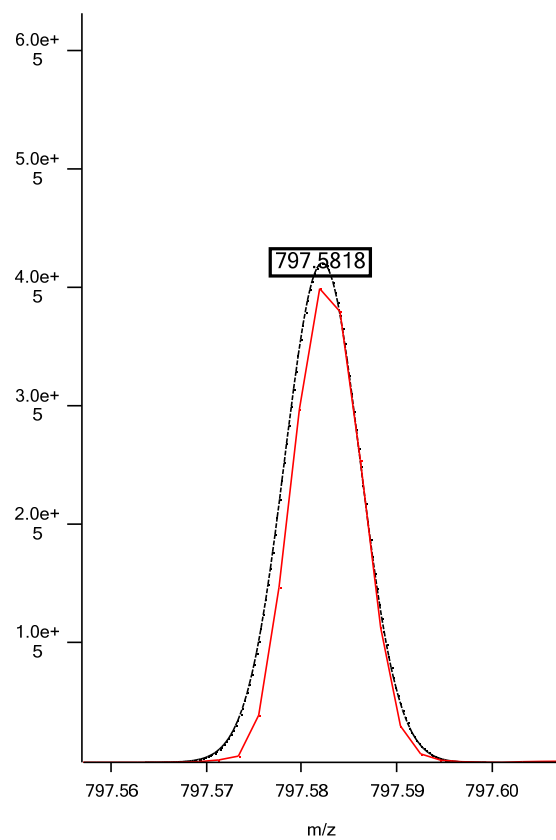

### Isotope 3

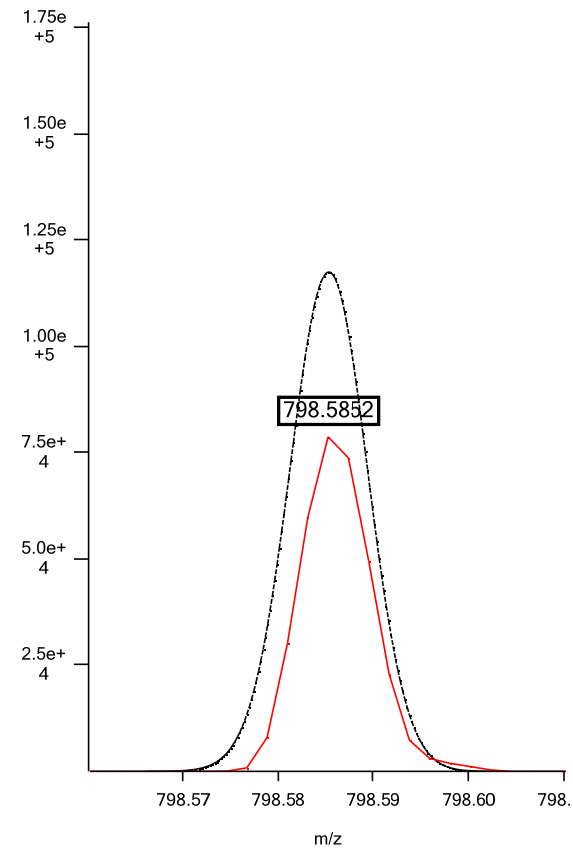

Positive ESI: PC 37:3; C<sub>45</sub>H<sub>85</sub>NO<sub>8</sub>P; theoretical *m/z* 798.6013, (M+H)<sup>+</sup>; isotopic fit 0.0132

### Isotope 1

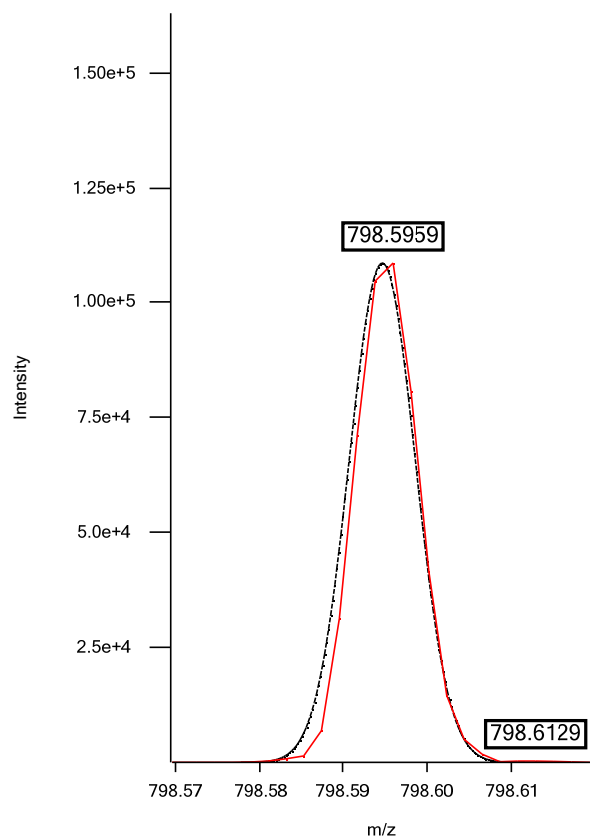

### Isotope 2

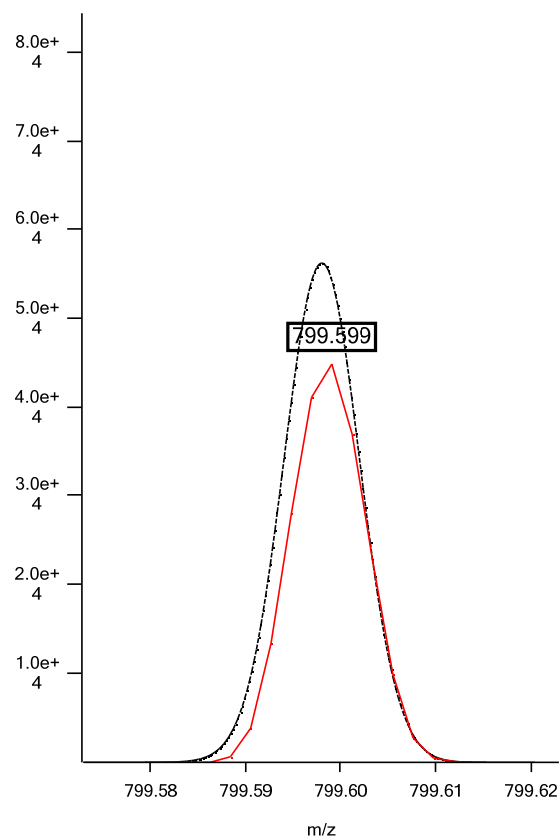

### Isotope 3

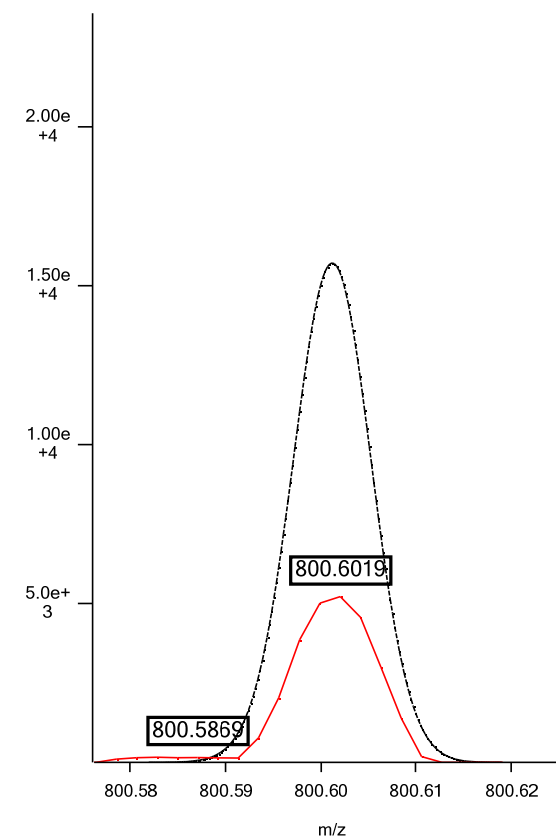

Positive ESI: PC 38:7; C<sub>46</sub>H<sub>79</sub>NO<sub>8</sub>P; theoretical  $m/z$  804.5543, (M+H)<sup>+</sup>; isotopic fit 0.0223

### Isotope 1

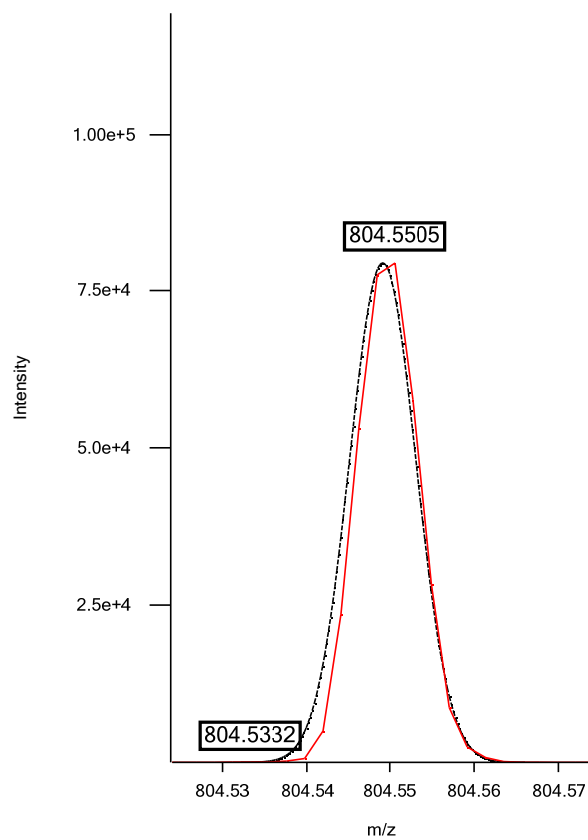

### Isotope 2

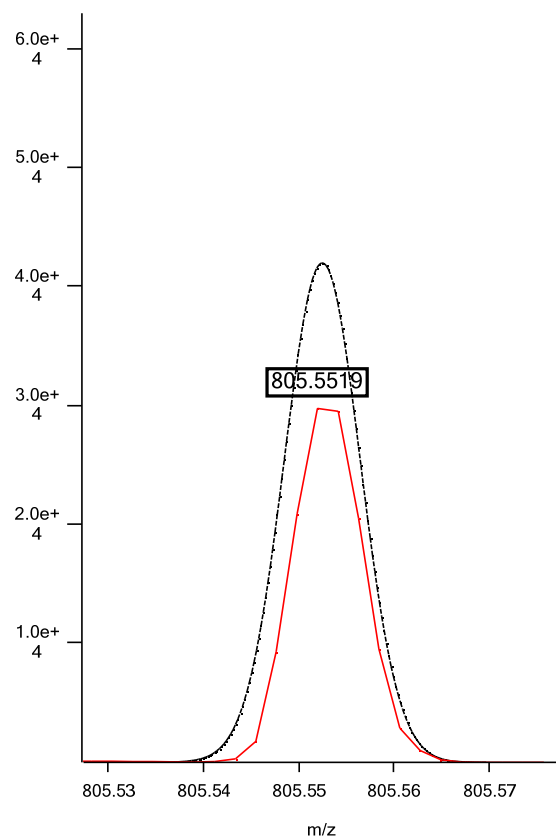

### Isotope 3

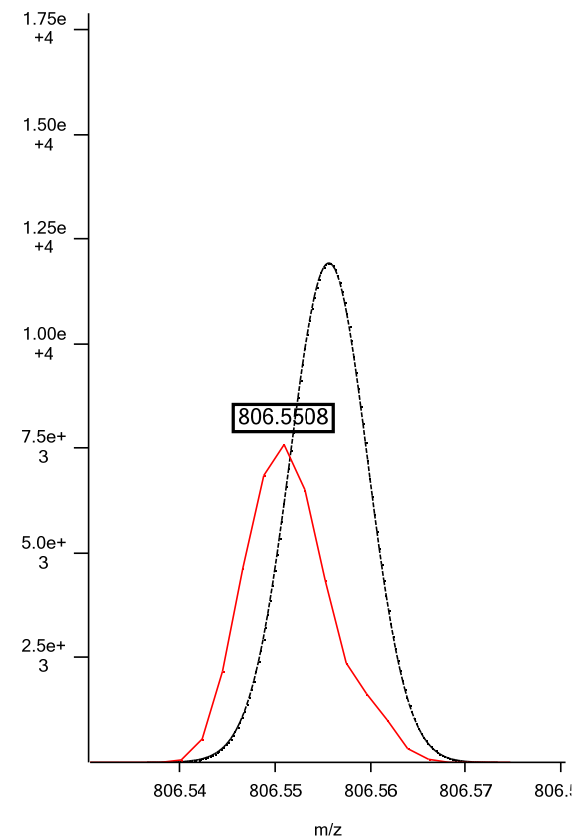

Positive ESI: PC 38:6; C<sub>46</sub>H<sub>81</sub>NO<sub>8</sub>P; theoretical  $m/z$  806.5699, (M+H)<sup>+</sup>; isotopic fit 0.0077

### Isotope 1

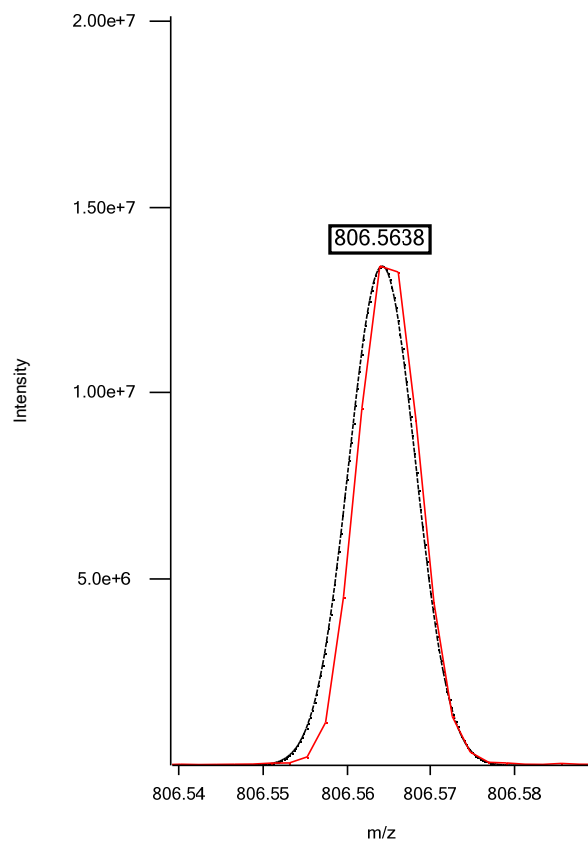

### Isotope 2

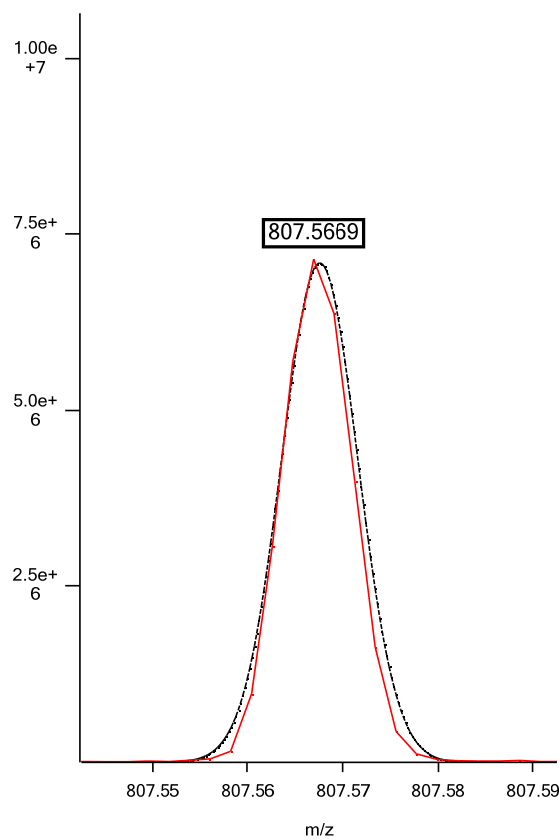

### Isotope 3

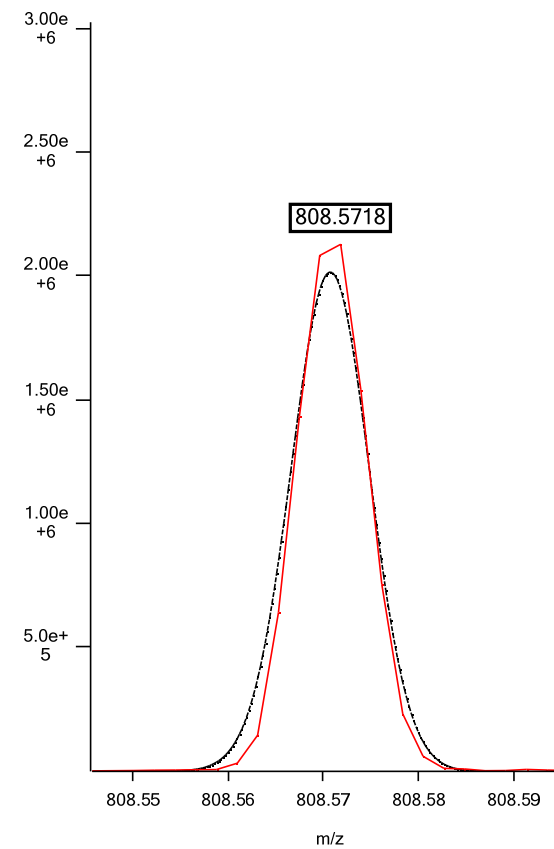

Positive ESI: PC 38:5; C<sub>46</sub>H<sub>83</sub>NO<sub>8</sub>P; theoretical  $m/z$  808.5856, (M+H)<sup>+</sup>; isotopic fit 0.0035

### Isotope 1

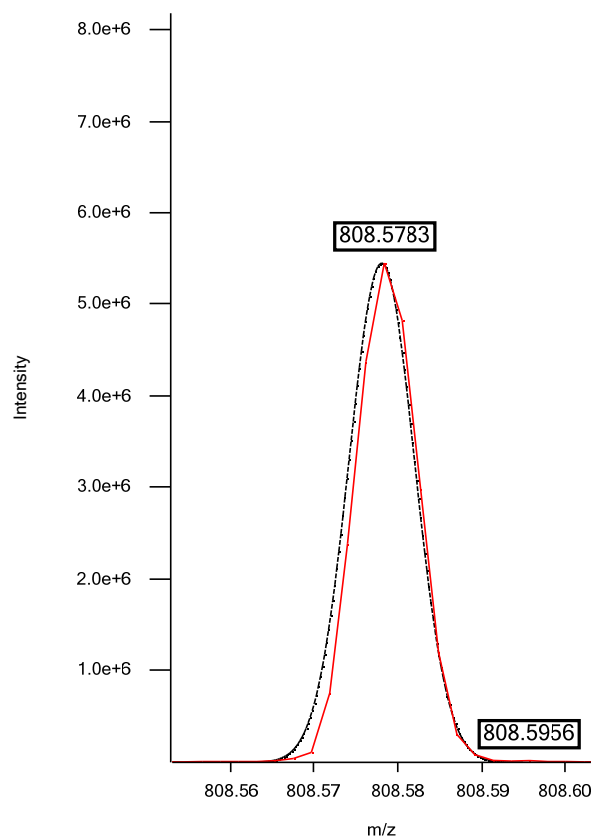

### Isotope 2

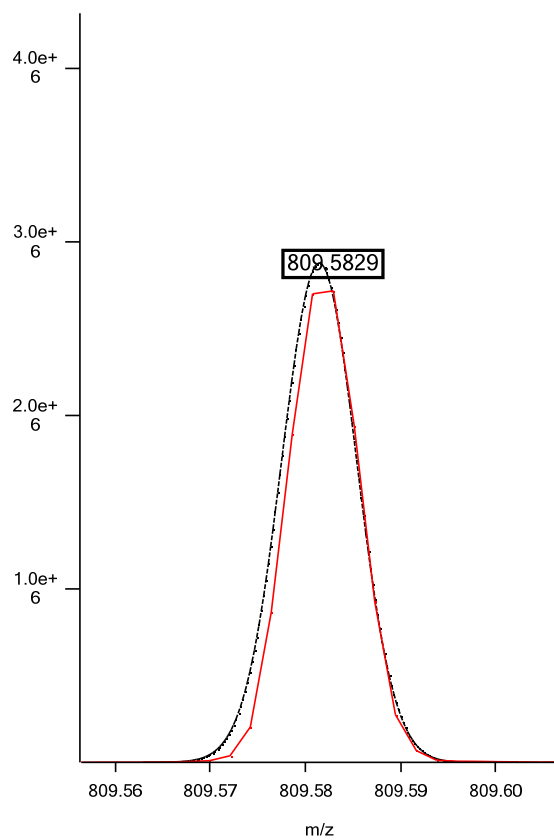

### Isotope 3

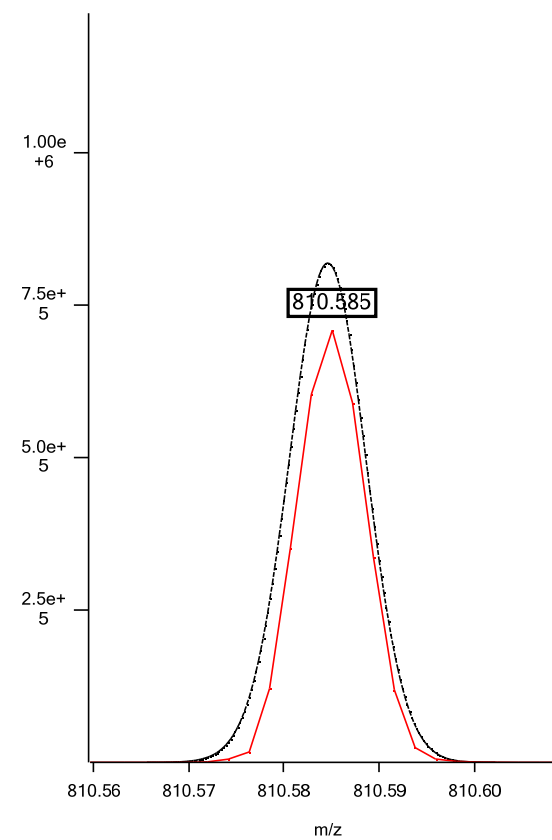

Positive ESI: PC 16:1p/22:4 or 16:0e/22:5; C<sub>46</sub>H<sub>85</sub>NO<sub>7</sub>P; theoretical *m/z* 794.6063, (M+H)<sup>+</sup>; isotopic fit 0.0032

### Isotope 1

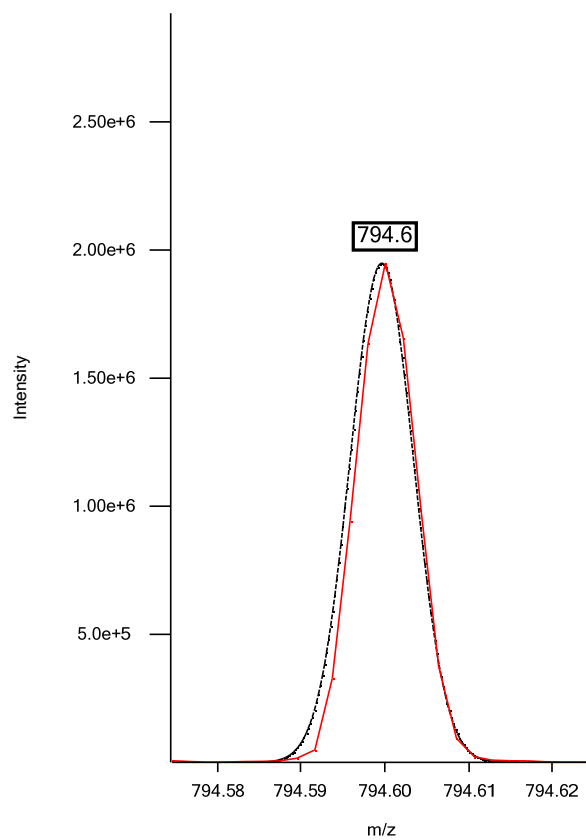

### Isotope 2

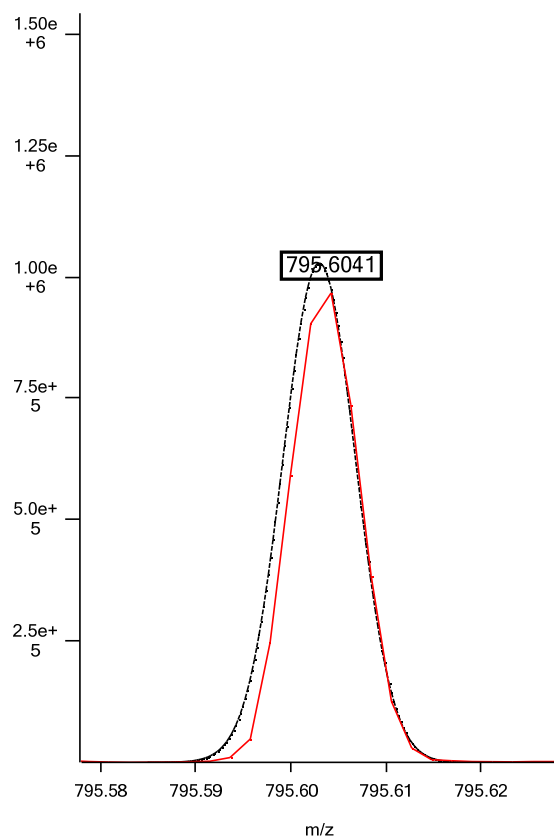

### Isotope 3

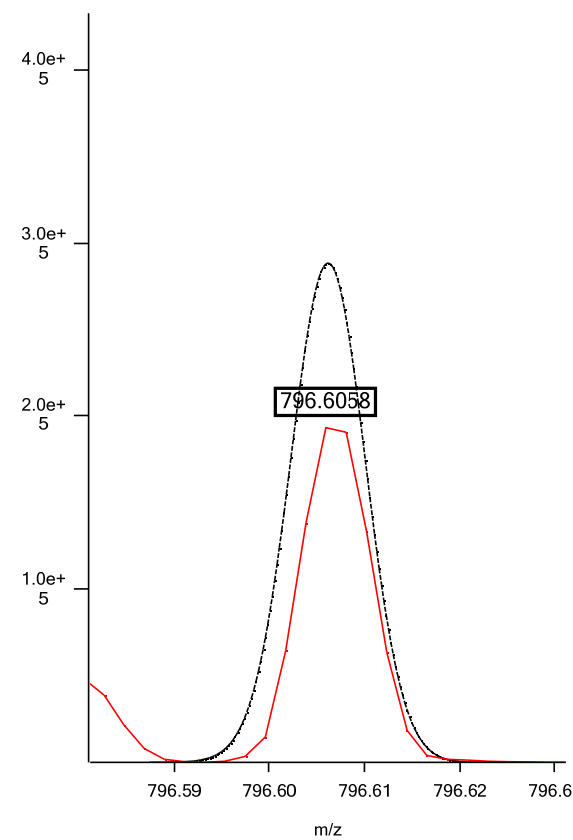

Positive ESI: PC 38:4; C<sub>46</sub>H<sub>85</sub>NO<sub>8</sub>P; theoretical  $m/z$  810.6013, (M+H)<sup>+</sup>; isotopic fit 0.0042

### Isotope 1

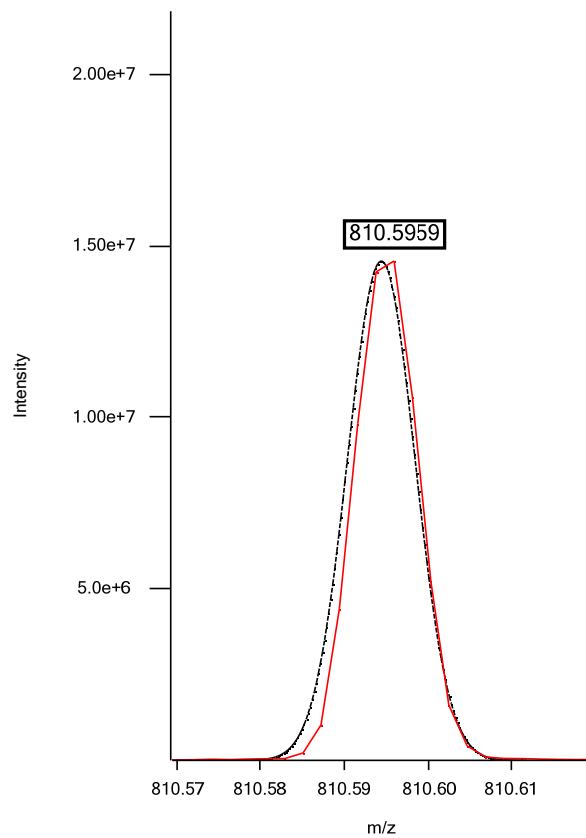

### Isotope 2

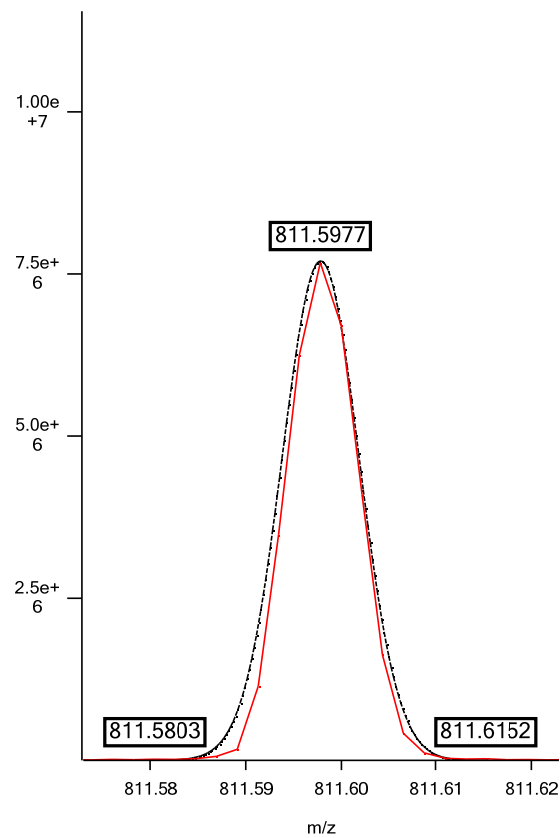

### Isotope 3

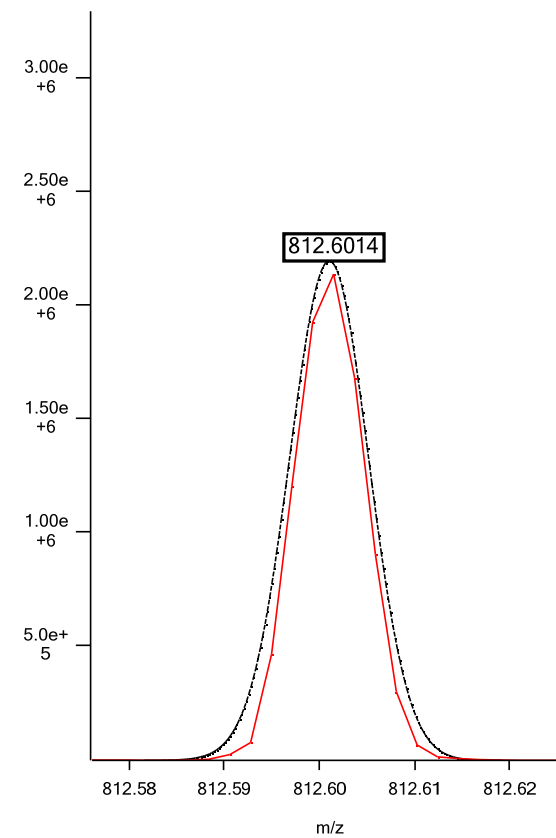

Negative ESI: Oxidized PC 18:1/Hydroperoxy-18:2;  $C_{46}H_{85}NO_{12}P$ ; theoretical  $m/z$  874.5809, (M-H)<sup>-</sup>; isotopic fit 0.0039

### Isotope 1

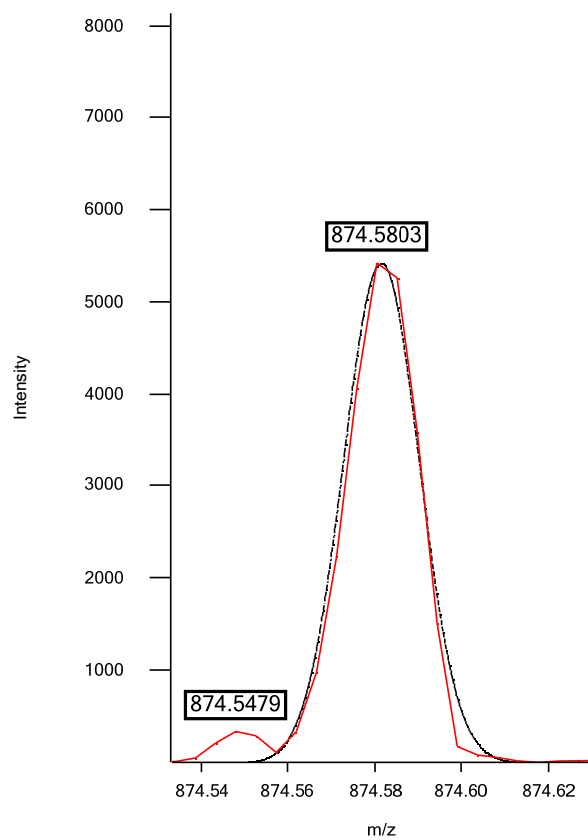

### Isotope 2

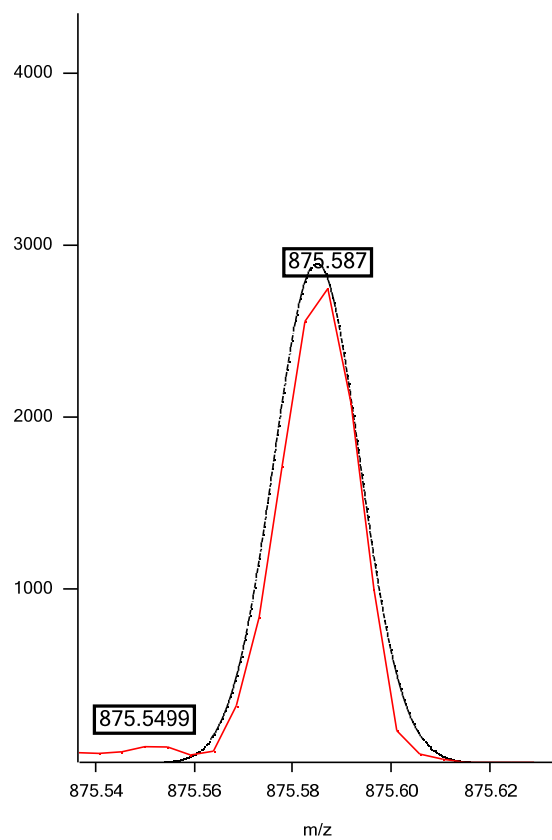

### Isotope 3

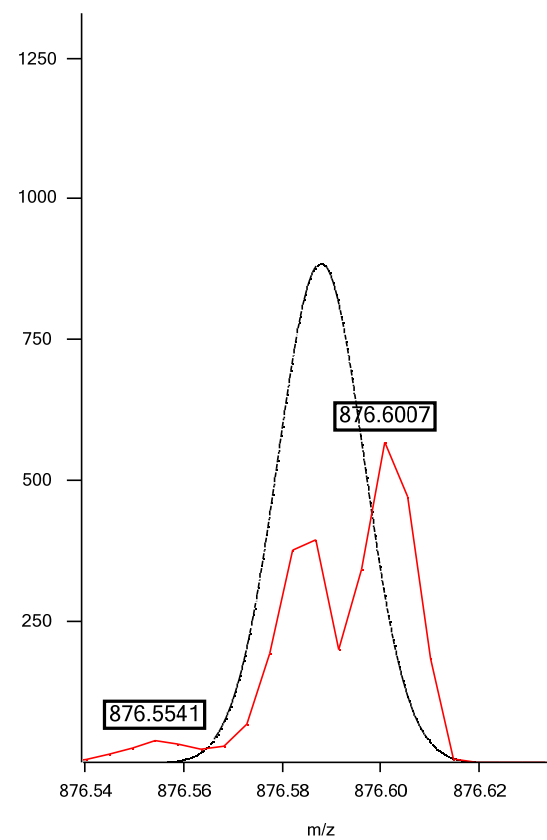



Negative ESI: Oxidized PC 16:0/Hydroxy-20:3;  $C_{46}H_{85}NO_{11}P$ ; theoretical  $m/z$  858.5860, (M-H)<sup>-</sup>; isotopic fit 0.0036

### Isotope 1

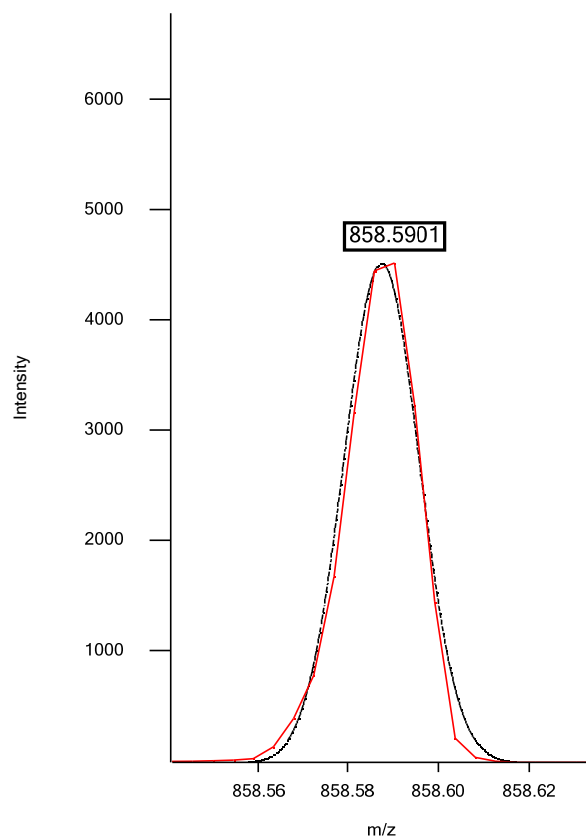

### Isotope 2

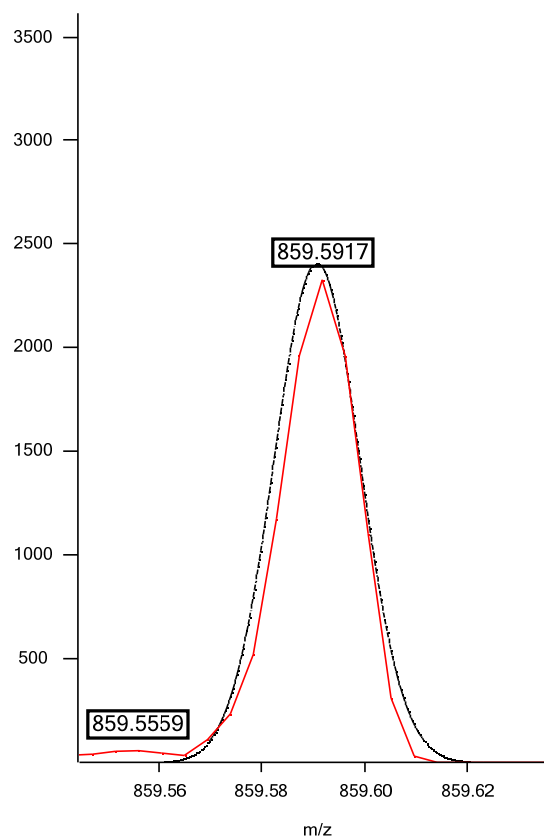

### Isotope 3

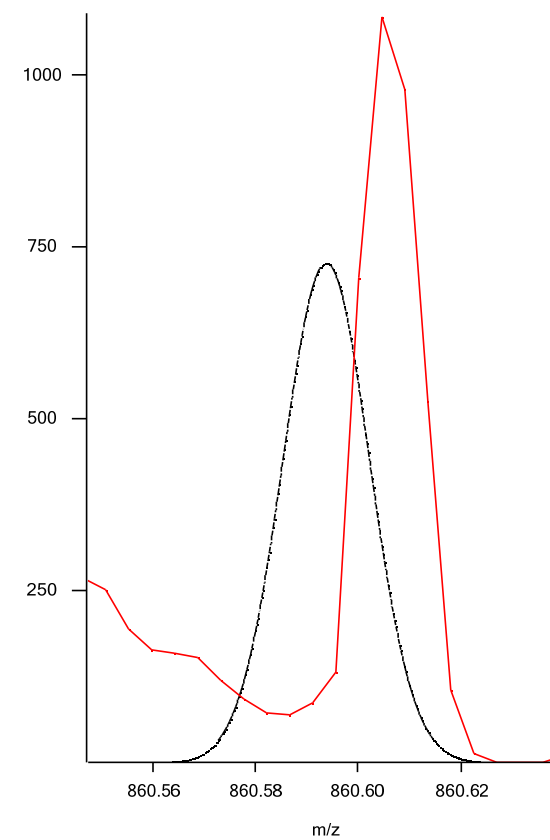

Positive ESI: PC 16:1p/22:3 or 16:0e/22:4; C<sub>46</sub>H<sub>87</sub>NO<sub>7</sub>P; theoretical *m/z* 796.6220, (M+H)<sup>+</sup>; isotopic fit 0.0050

### Isotope 1

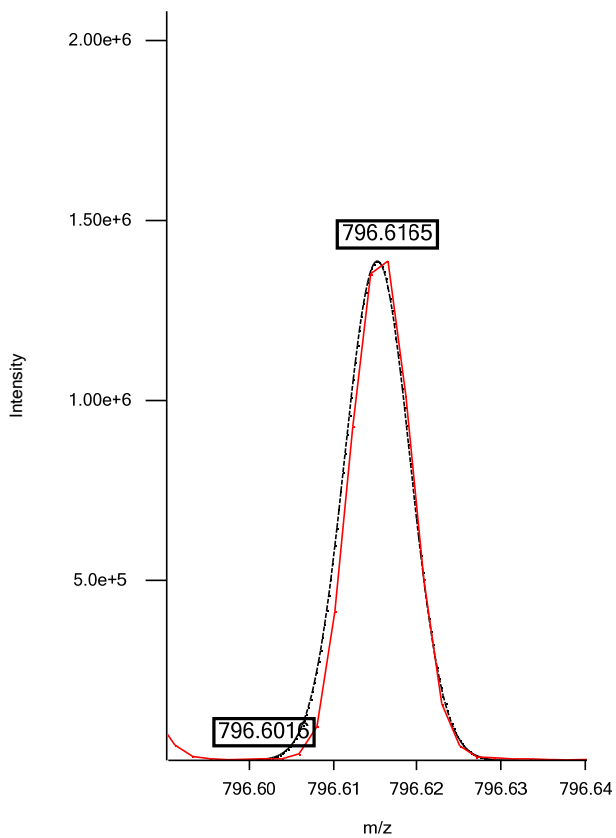

### Isotope 2

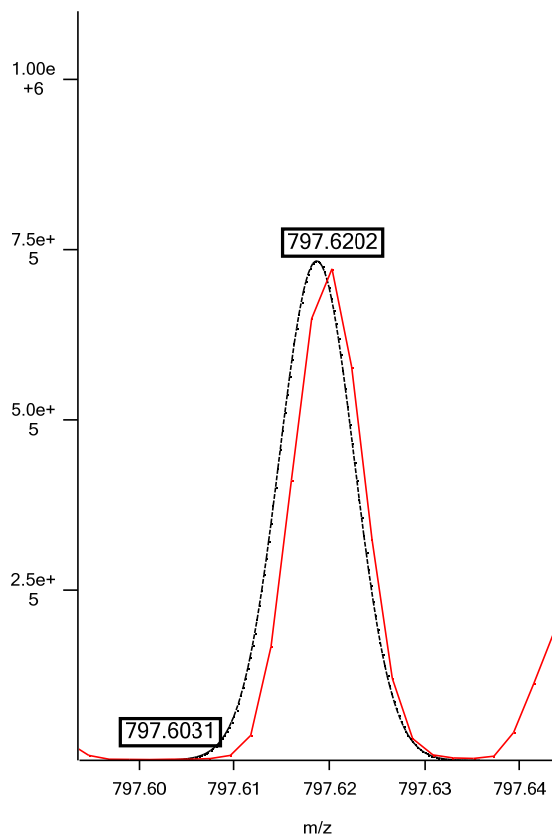

### Isotope 3

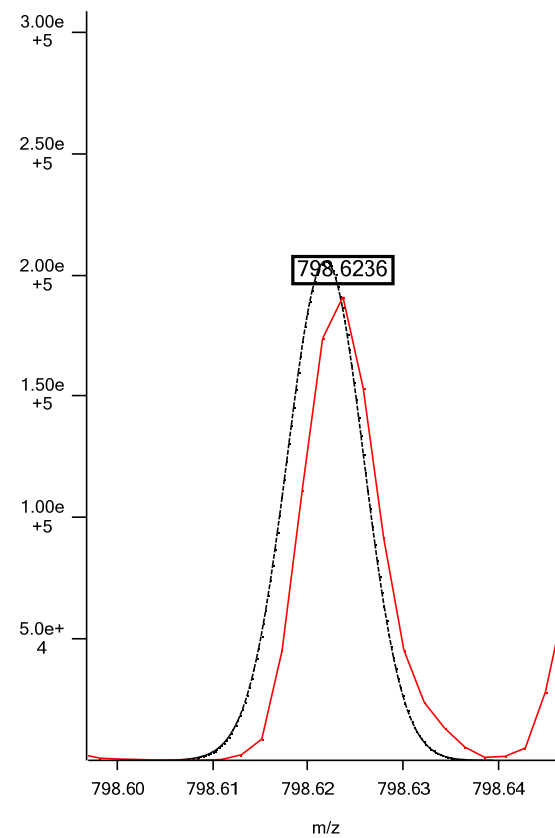

Positive ESI: PC 38:3; C<sub>46</sub>H<sub>87</sub>NO<sub>8</sub>P; theoretical  $m/z$  812.6169, (M+H)<sup>+</sup>; isotopic fit 0.0047

### Isotope 1

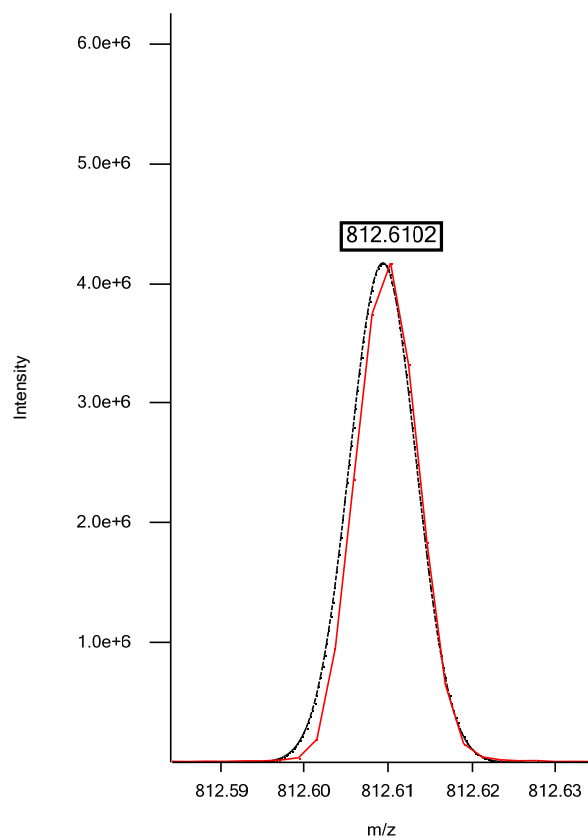

### Isotope 2

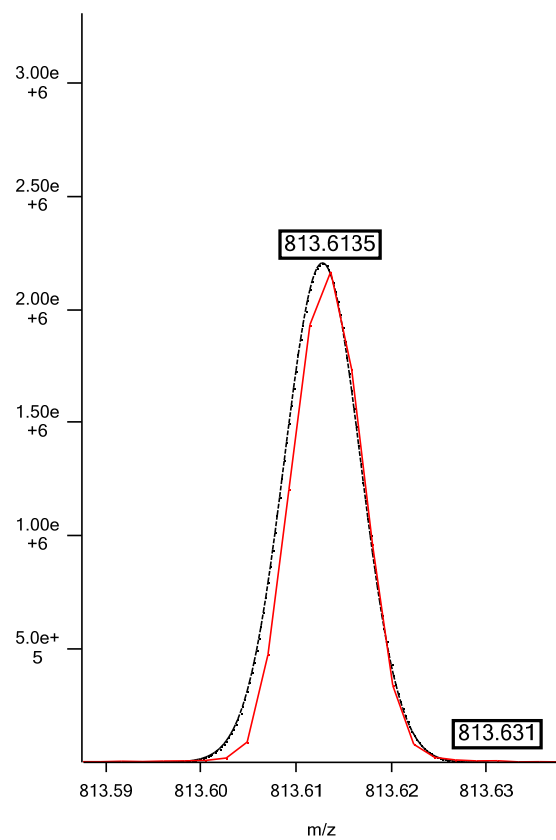

### Isotope 3

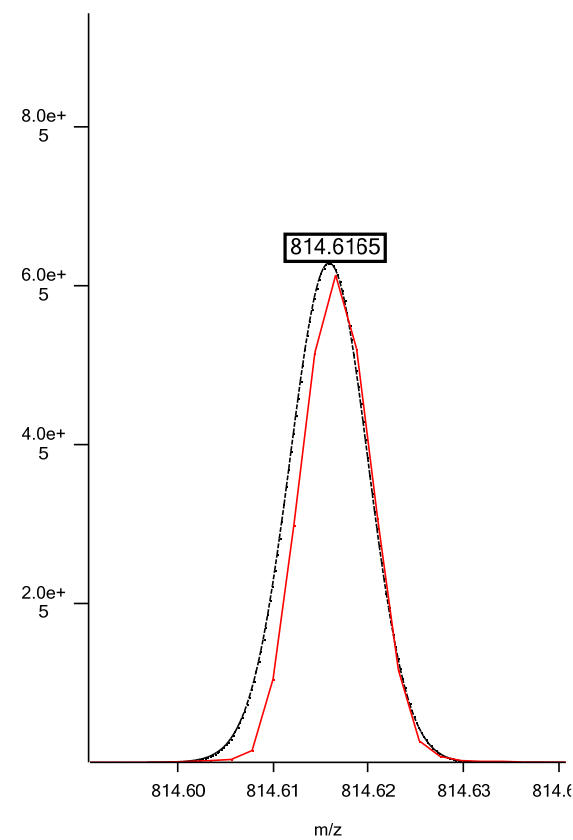

Negative ESI: Oxidized PC 18:0/Hydroperoxy-18:2;  $C_{46}H_{87}NO_{12}P$ ; theoretical  $m/z$  876.5966, (M-H)<sup>-</sup>; isotopic fit 0.0037

### Isotope 1

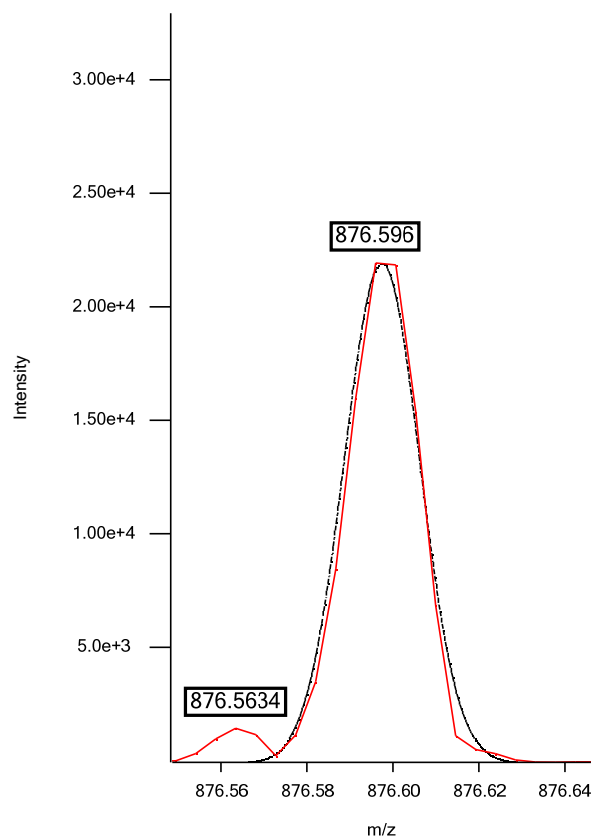

### Isotope 2

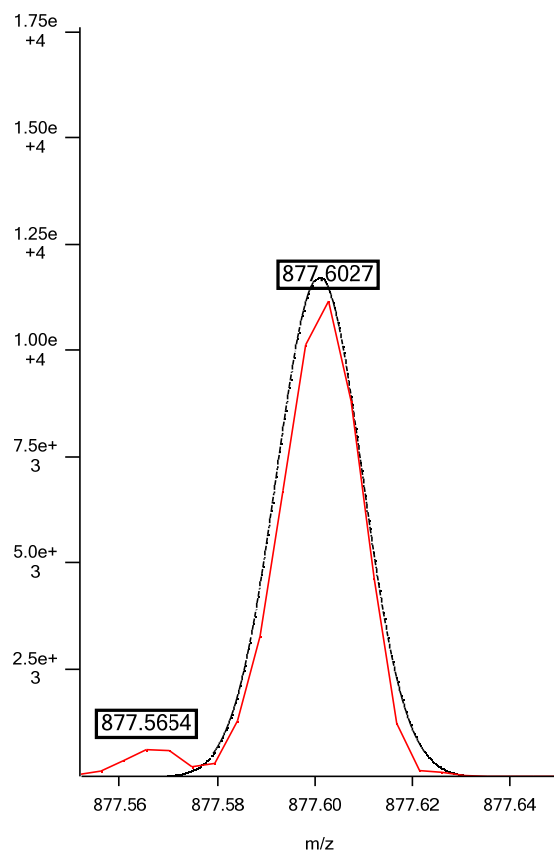

### Isotope 3

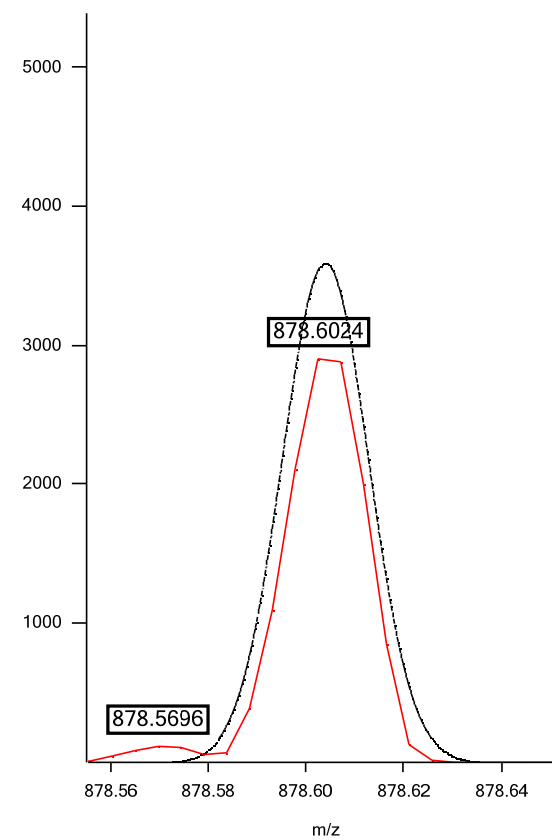

Positive ESI: PC 16:1p/22:2 or 16:0e/22:3; C<sub>46</sub>H<sub>89</sub>NO<sub>7</sub>P; theoretical  $m/z$  798.6376, (M+H)<sup>+</sup>; isotopic fit 0.0131

### Isotope 1

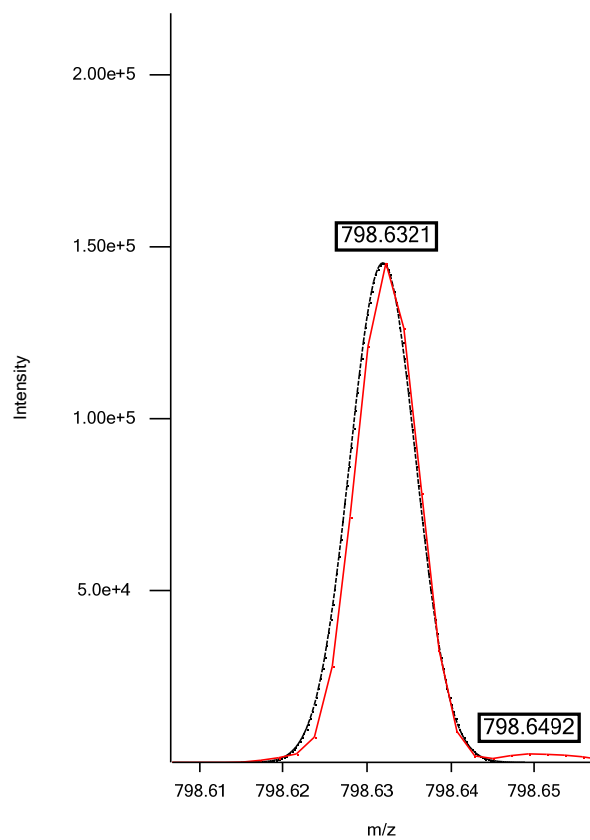

### Isotope 2

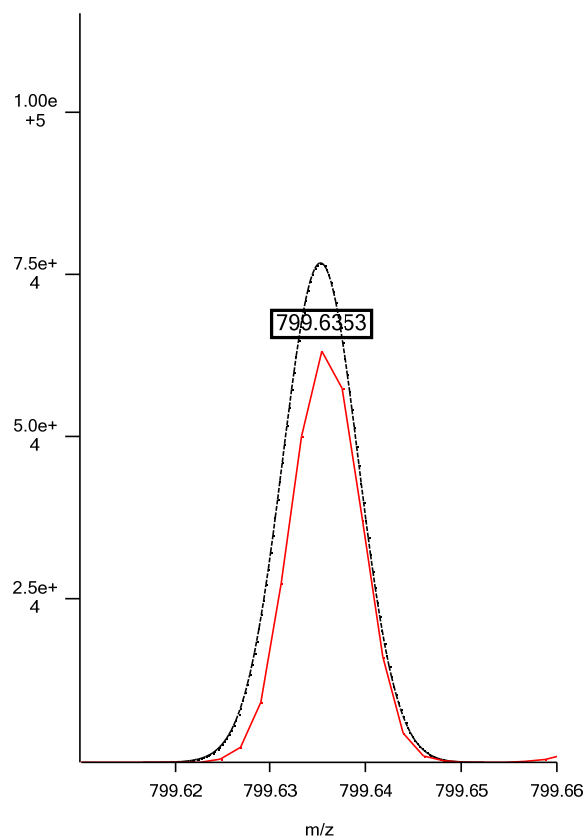

### Isotope 3

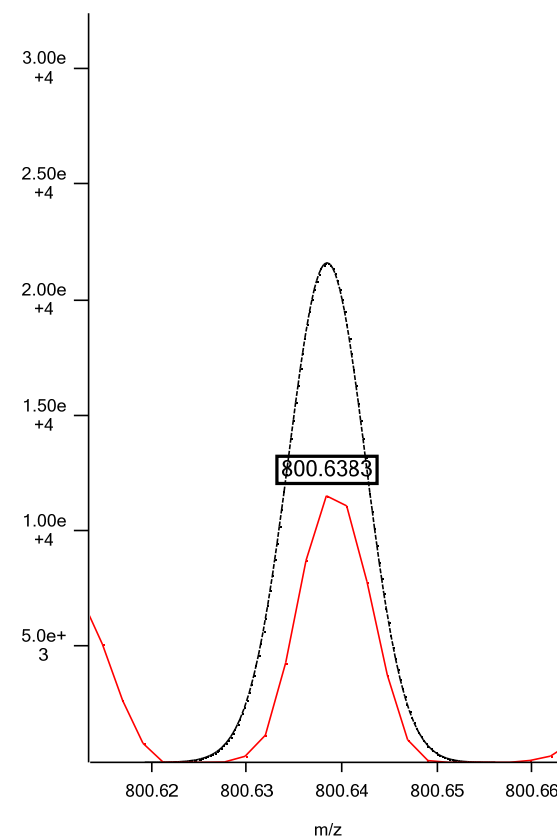

Positive ESI: PC 38:2; C<sub>46</sub>H<sub>89</sub>NO<sub>8</sub>P; theoretical *m/z* 814.6326, (M+H)<sup>+</sup>; isotopic fit 0.0066

### Isotope 1

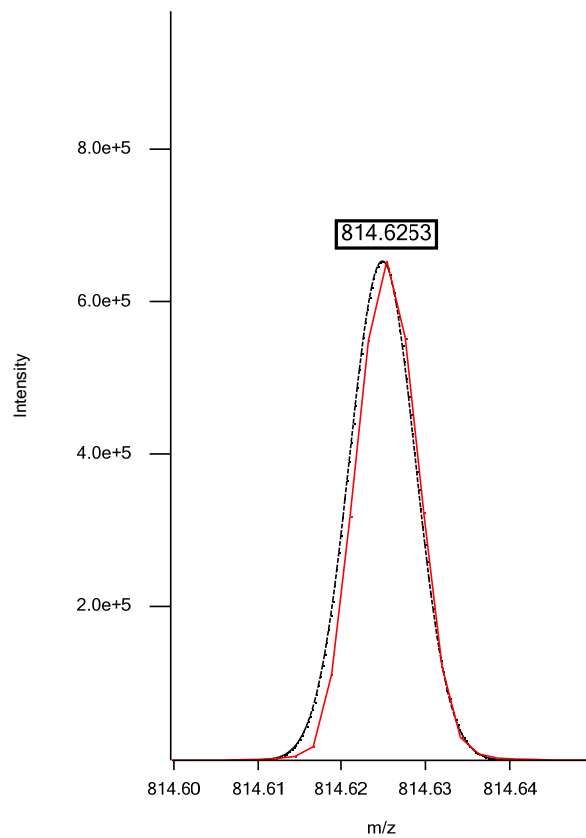

### Isotope 2

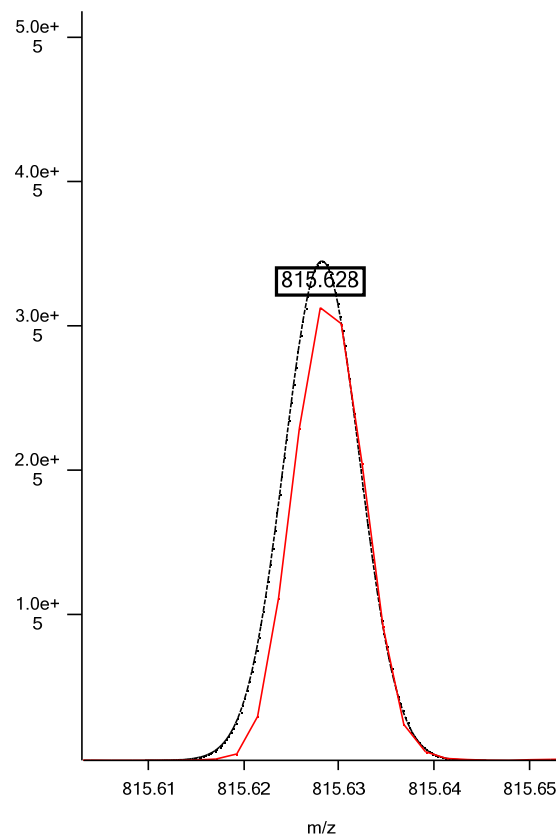

### Isotope 3

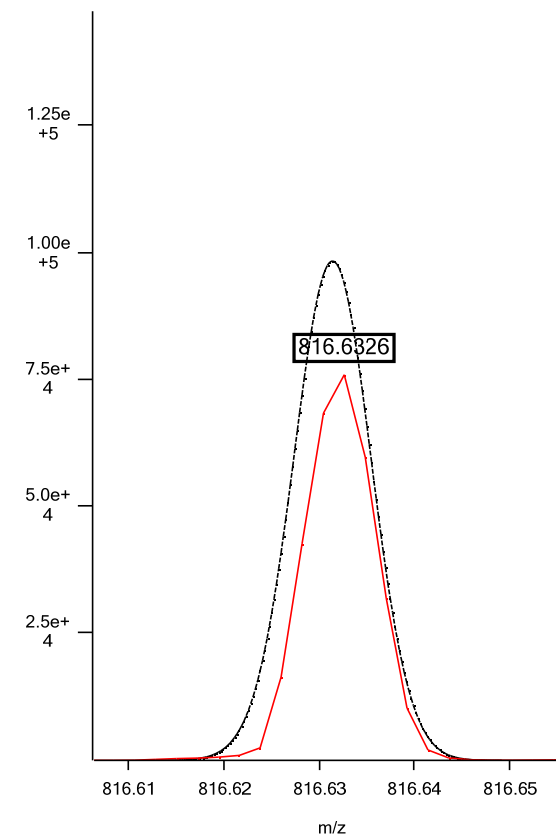

Positive ESI: PC 39:6; C<sub>47</sub>H<sub>83</sub>NO<sub>8</sub>P; theoretical  $m/z$  820.5856, (M+H)<sup>+</sup>; isotopic fit 0.0236

### Isotope 1

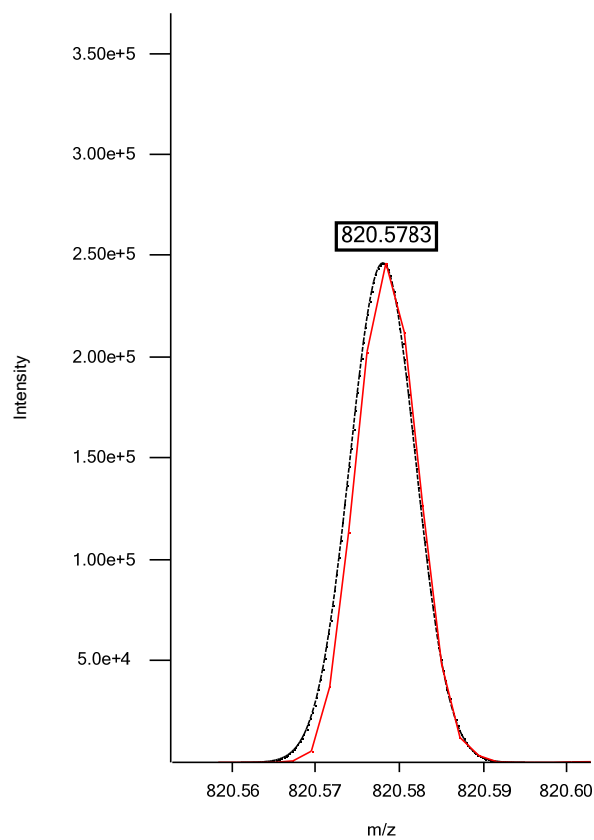

### Isotope 2

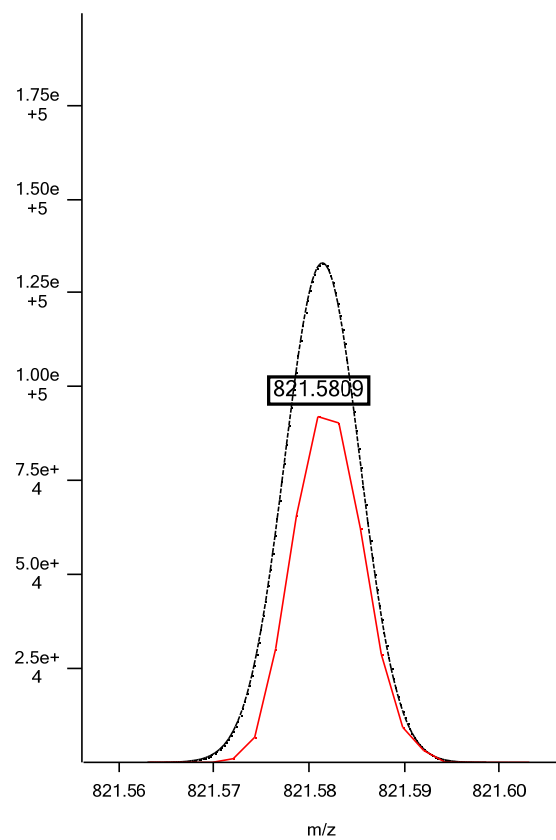

### Isotope 3

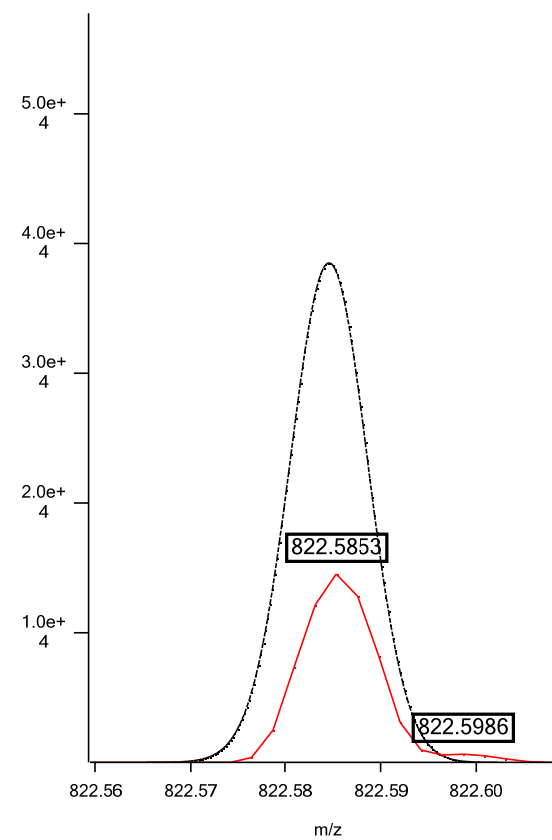

Positive ESI: PC 40:8; C<sub>48</sub>H<sub>81</sub>NO<sub>8</sub>P; theoretical *m/z* 830.5699, (M+H)<sup>+</sup>; isotopic fit 0.0107

### Isotope 1

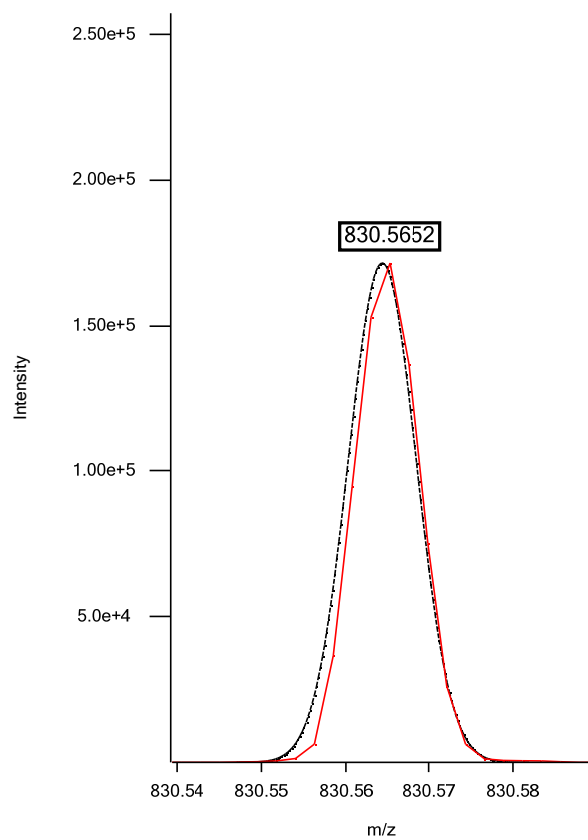

### Isotope 2

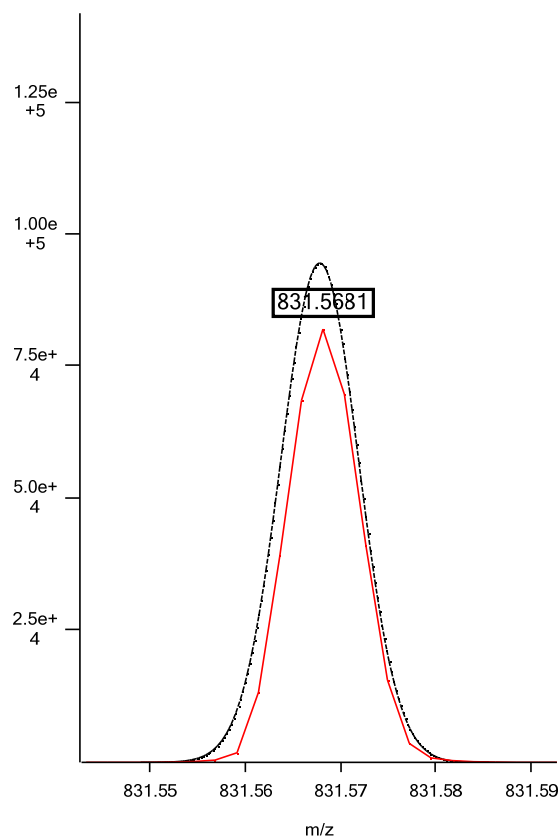

### Isotope 3

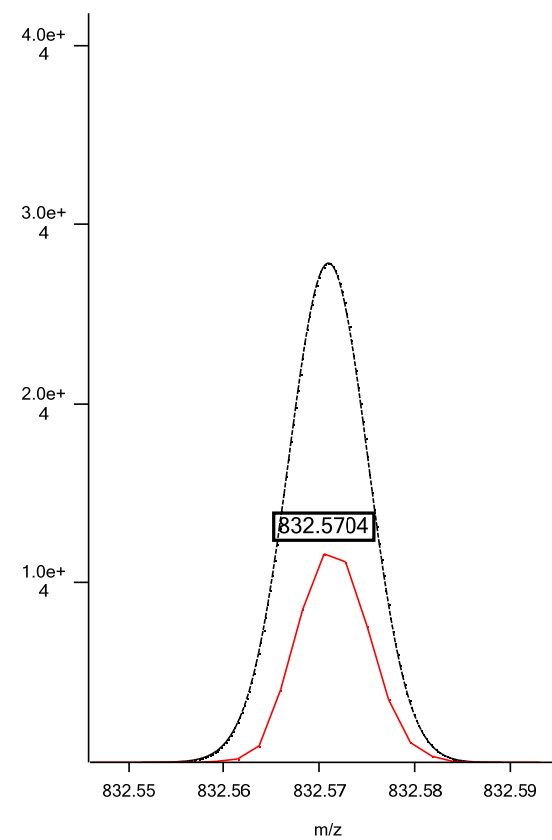



Positive ESI: PC 40:7; C<sub>48</sub>H<sub>83</sub>NO<sub>8</sub>P; theoretical *m/z* 832.5856, (M+H)<sup>+</sup>; isotopic fit 0.0126

### Isotope 1

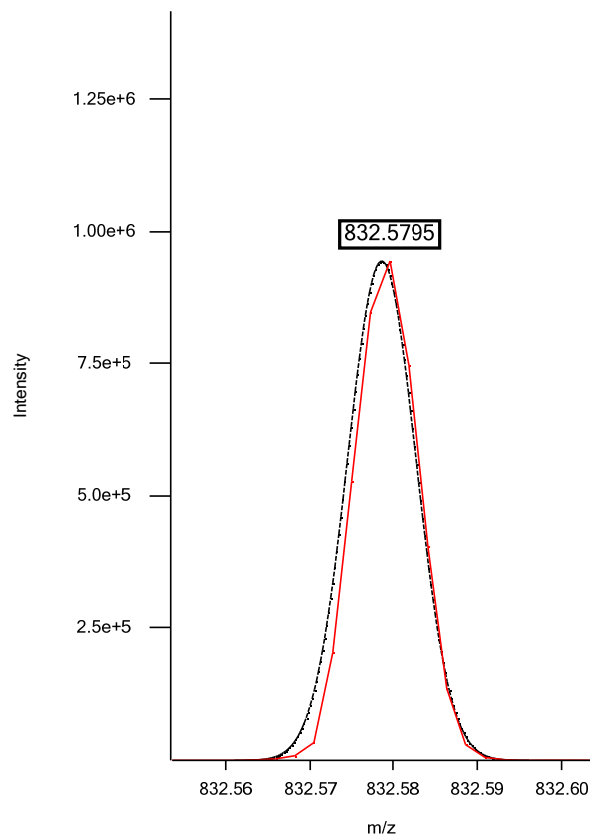

### Isotope 2

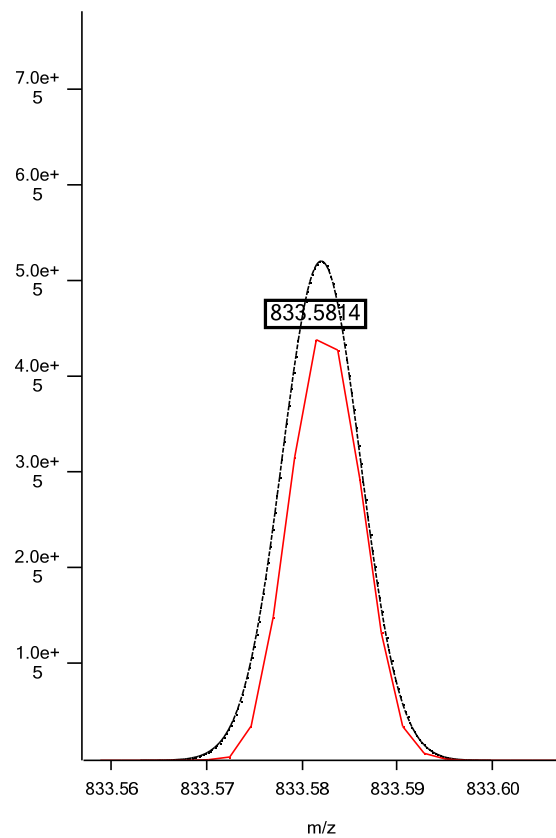

### Isotope 3

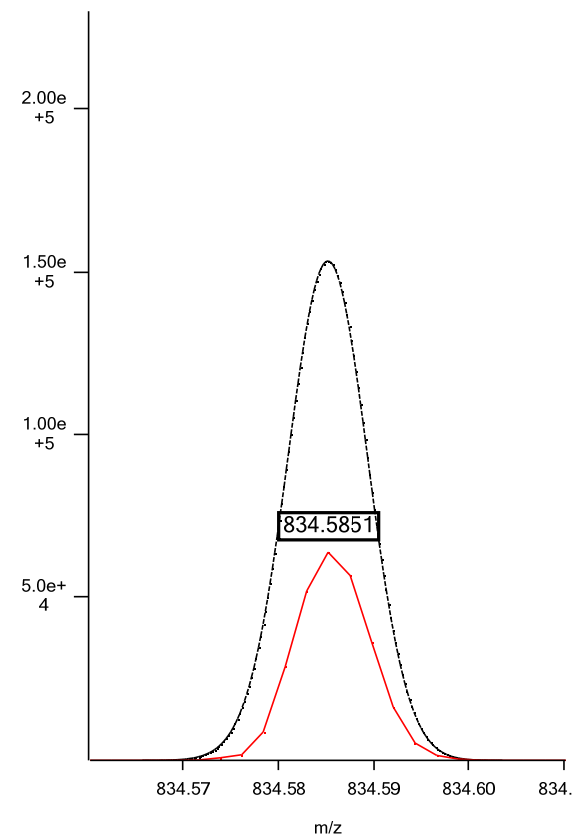

Negative ESI: Oxidized PC 16:0/Hydroxy-22:4;  $C_{48}H_{83}NO_{11}P$ ; theoretical  $m/z$  880.5703, (M-H)<sup>-</sup>; isotopic fit 0.0052

### Isotope 1

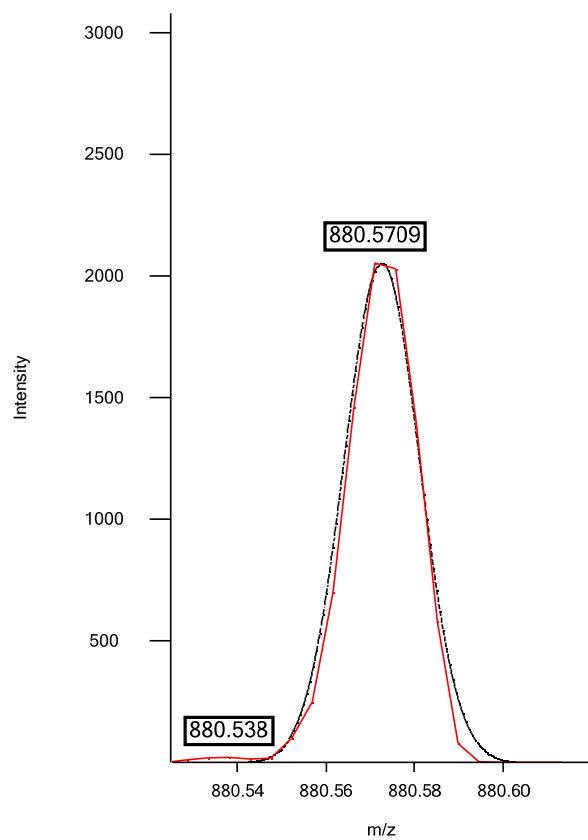

### Isotope 2

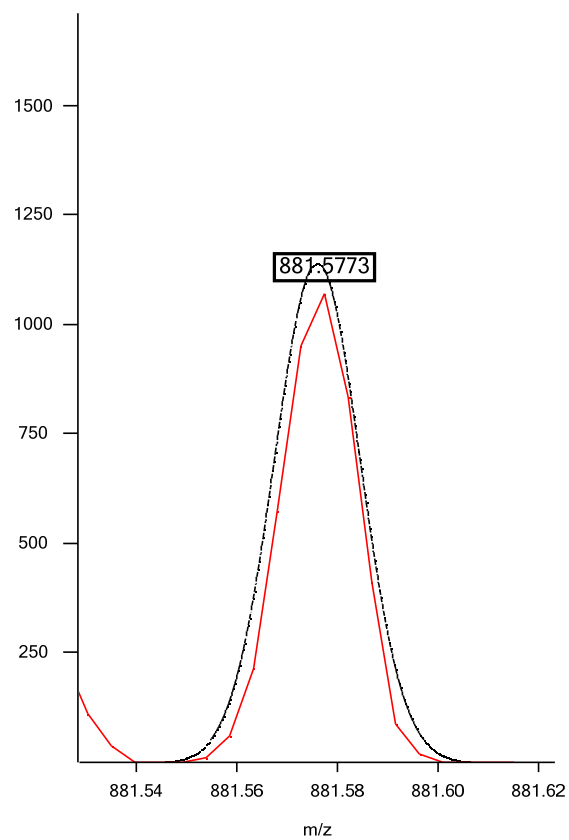

### Isotope 3

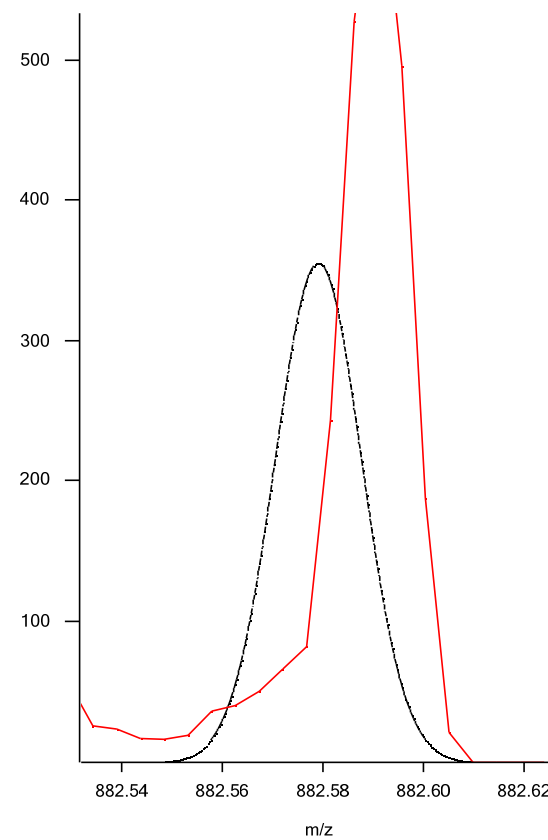

Negative ESI: Oxidized PC 16:0/Hydroperoxy-22:4;  $C_{48}H_{83}NO_{12}P$ ; theoretical  $m/z$  896.5653, (M-H)<sup>-</sup>; isotopic fit 0.0065

### Isotope 1

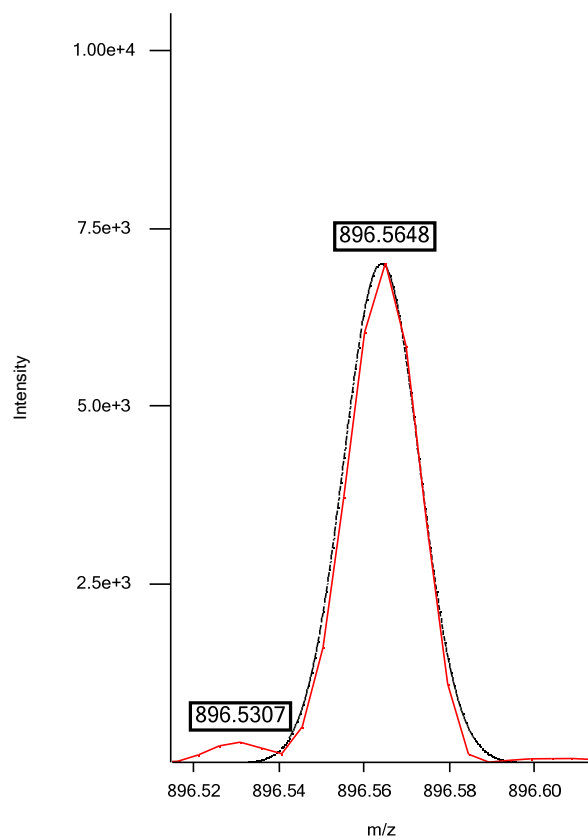

### Isotope 2

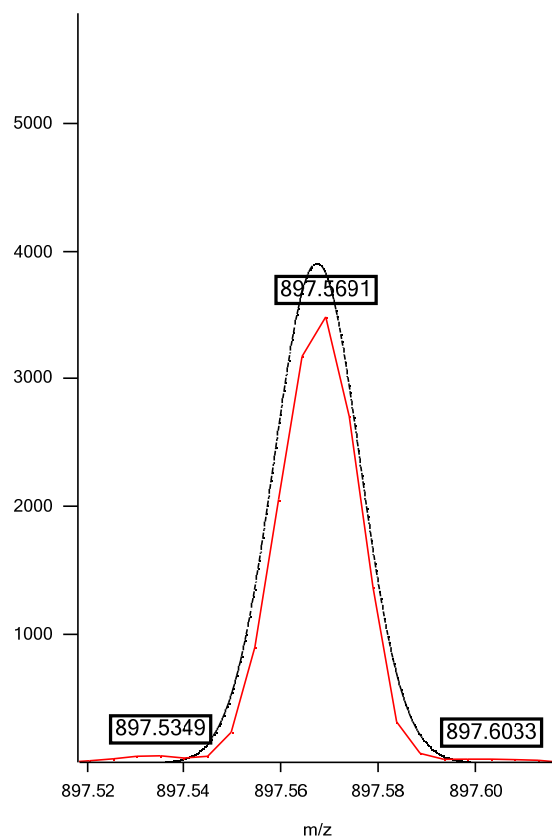

### Isotope 3

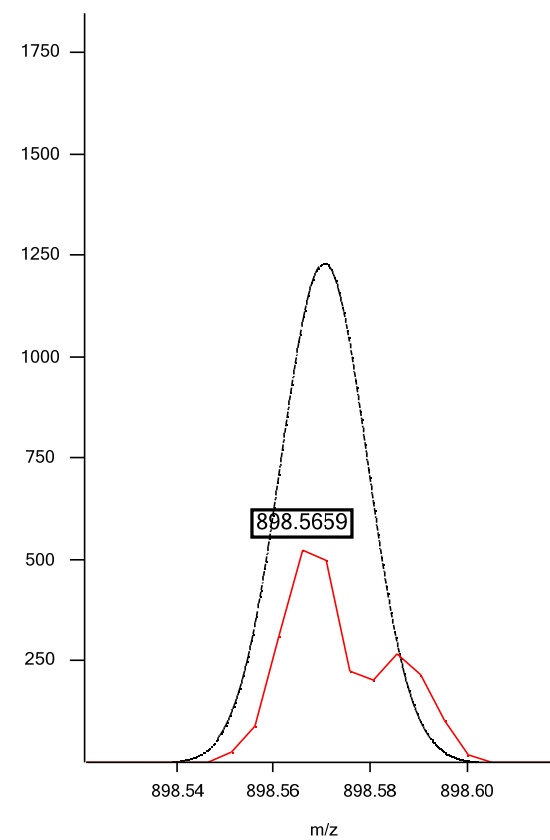

Positive ESI: PC 18:1p/22:6; C<sub>48</sub>H<sub>85</sub>NO<sub>7</sub>P; theoretical  $m/z$  818.6063, (M+H)<sup>+</sup>; isotopic fit 0.0047

### Isotope 1

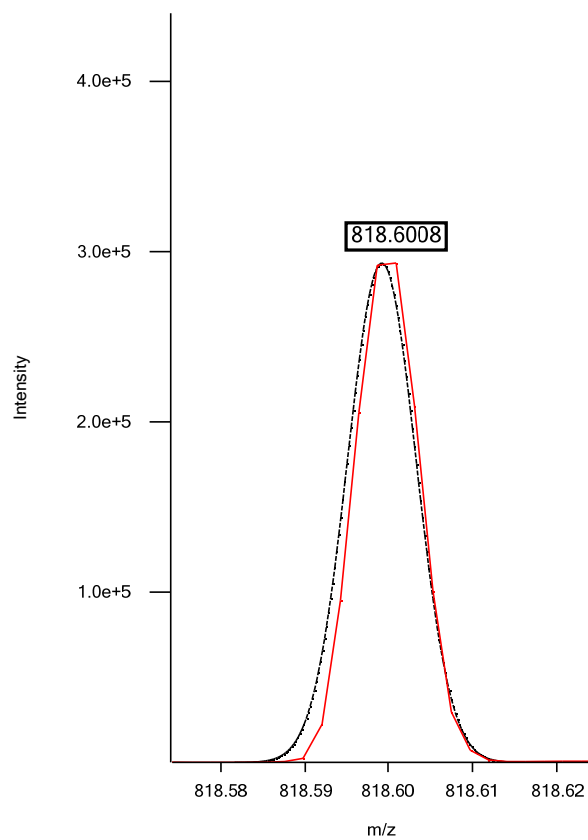

### Isotope 2

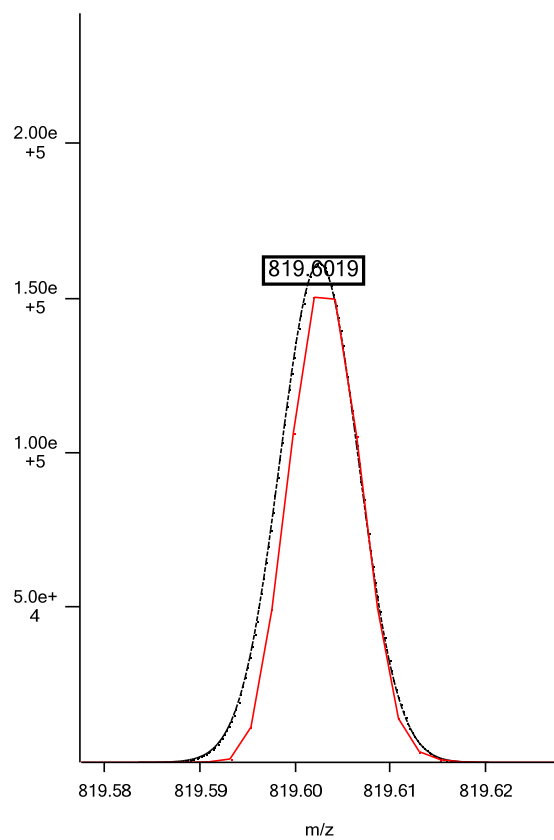

### Isotope 3

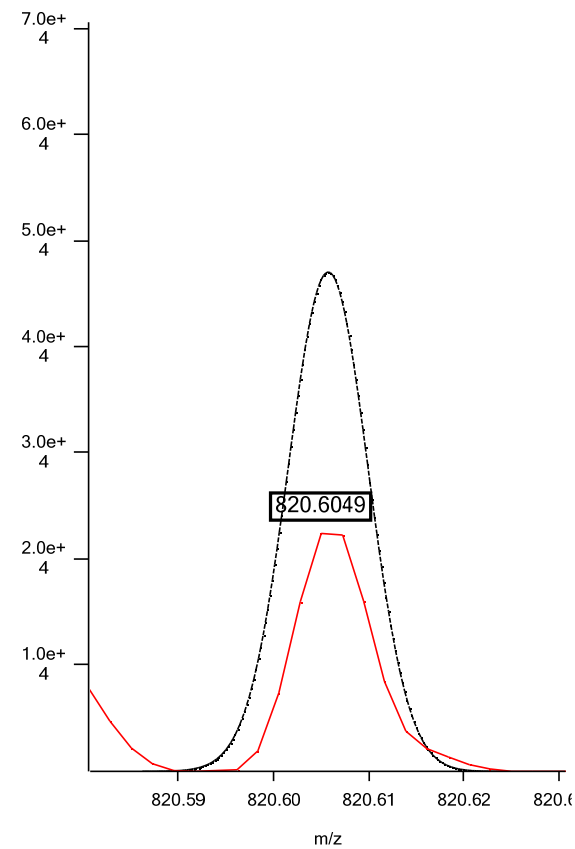

Positive ESI: PC 40:6; C<sub>48</sub>H<sub>85</sub>NO<sub>8</sub>P; theoretical *m/z* 834.6013, (M+H)<sup>+</sup>; isotopic fit 0.0037

### Isotope 1

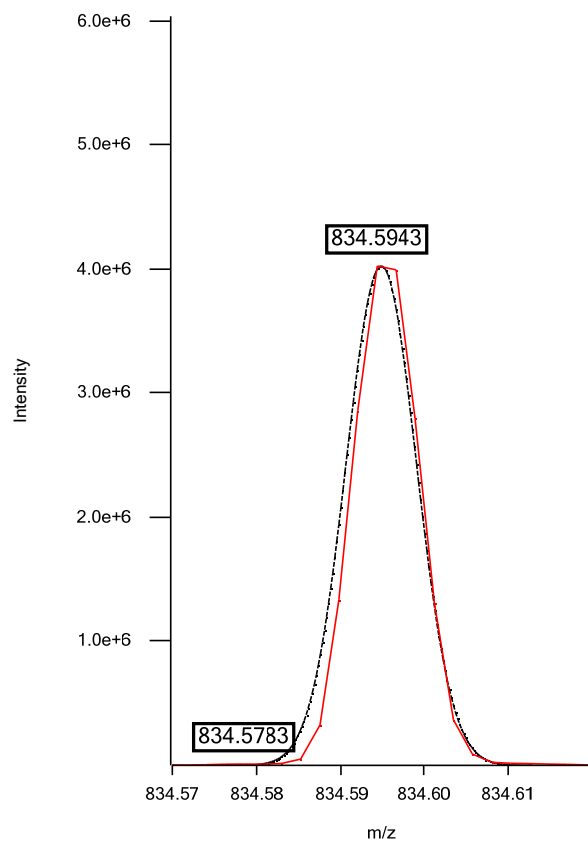

### Isotope 2

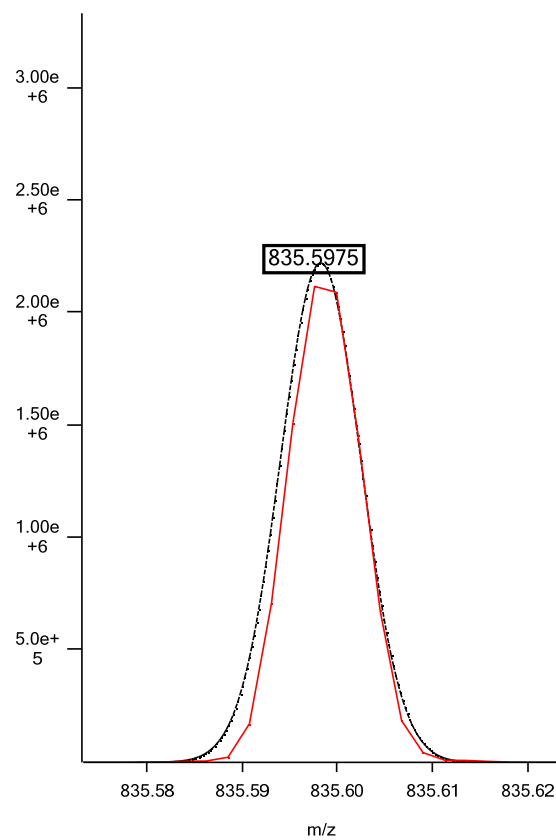

### Isotope 3

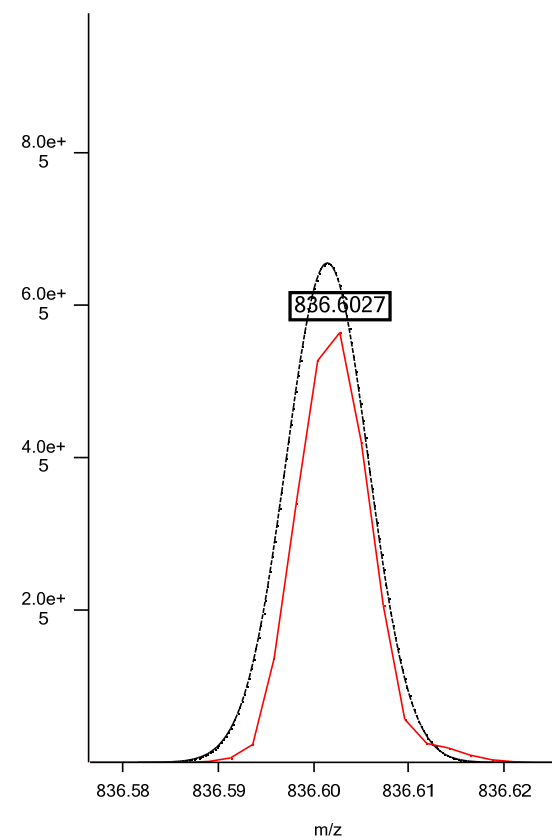

Positive ESI: PC 18:1p/22:5 or 18:0e/22:6;  $C_{48}H_{87}NO_7P$ ; theoretical  $m/z$  820.6220,  $(M+H)^+$ ; isotopic fit 0.0139

### Isotope 1

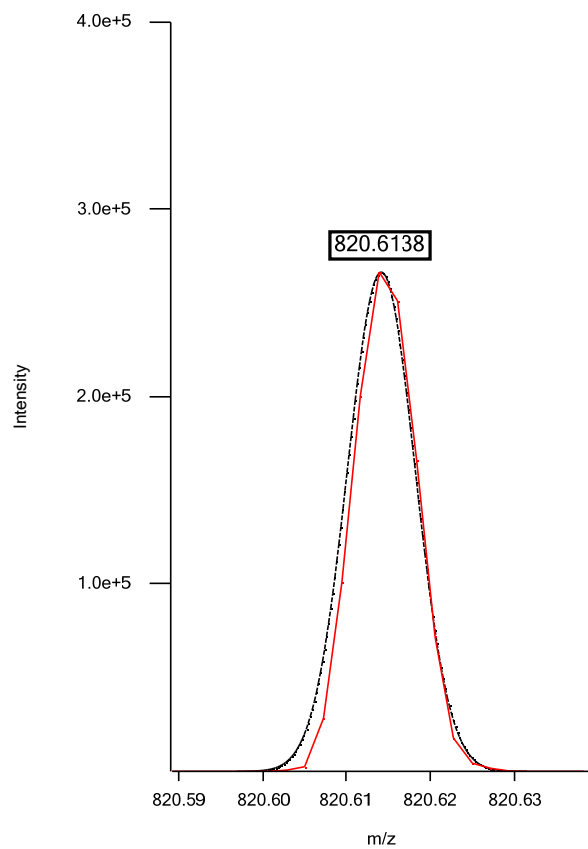

### Isotope 2

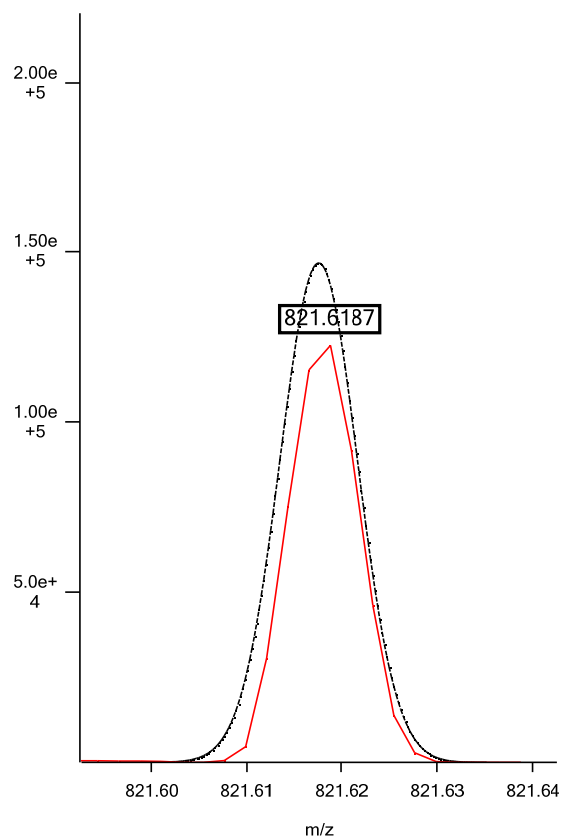

### Isotope 3

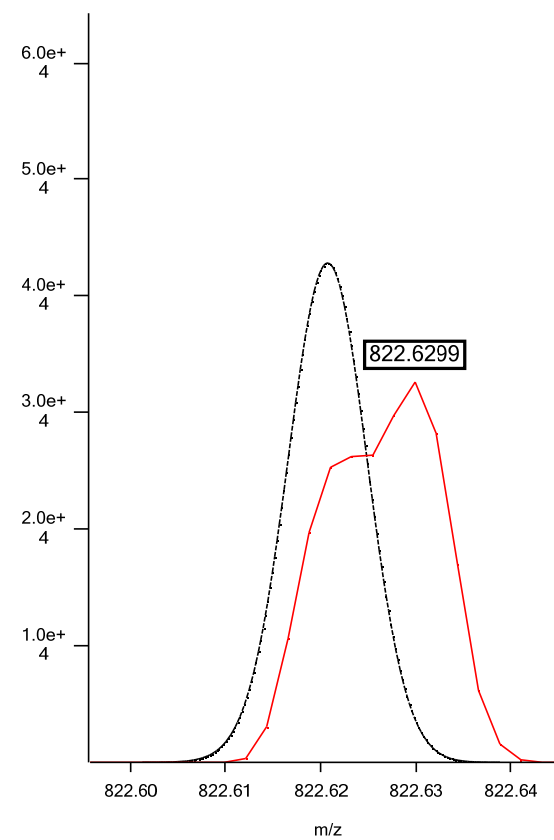

Positive ESI: PC 40:5; C<sub>48</sub>H<sub>87</sub>NO<sub>8</sub>P; theoretical *m/z* 836.6169, (M+H)<sup>+</sup>; isotopic fit 0.0169

### Isotope 1

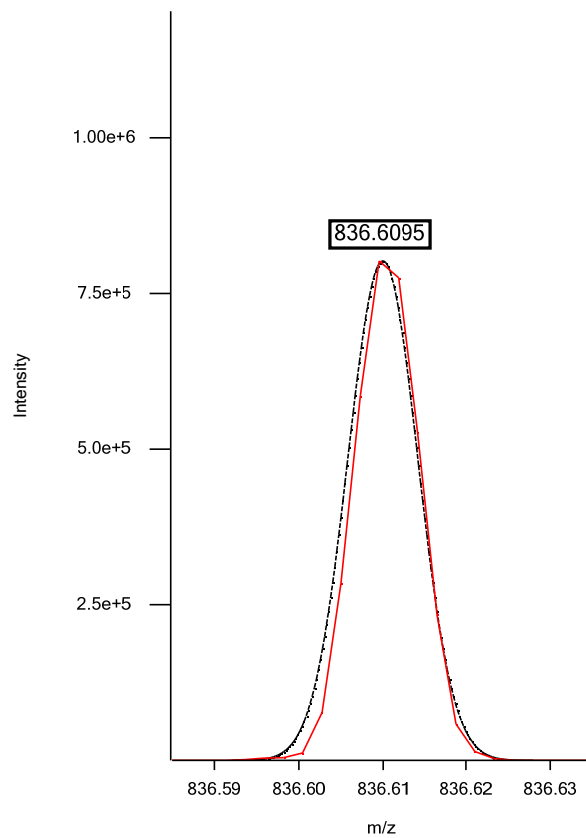

### Isotope 2

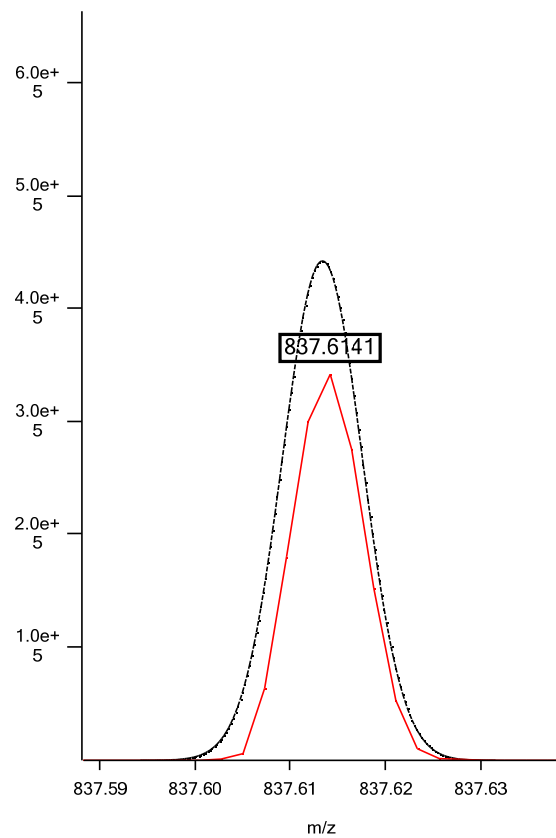

### Isotope 3

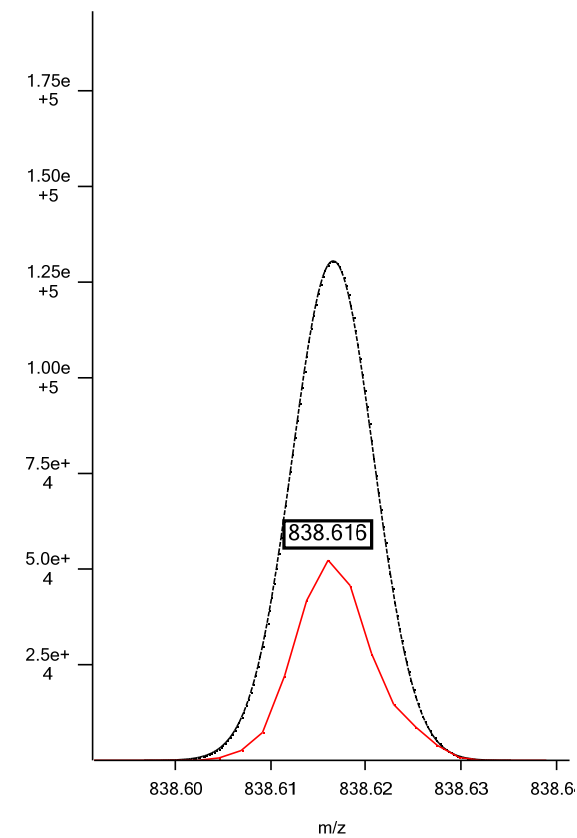

Positive ESI: PC 18:1p/22:4 or 18:0e/22:5; C<sub>48</sub>H<sub>89</sub>NO<sub>7</sub>P; theoretical *m/z* 822.6376, (M+H)<sup>+</sup>; isotopic fit 0.0062

### Isotope 1

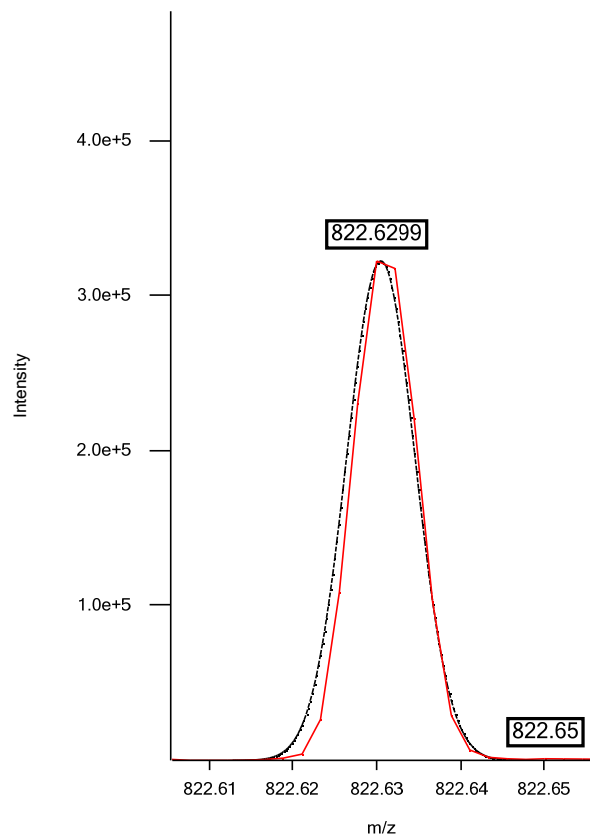

### Isotope 2

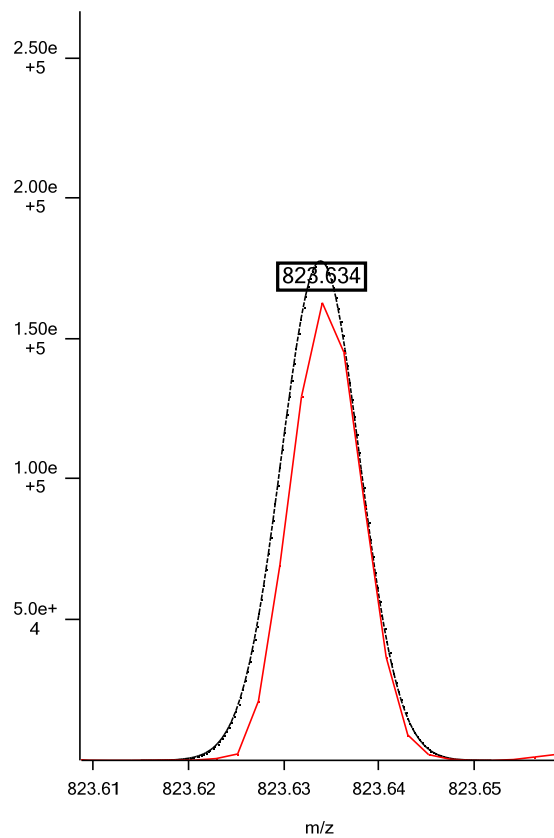

### Isotope 3

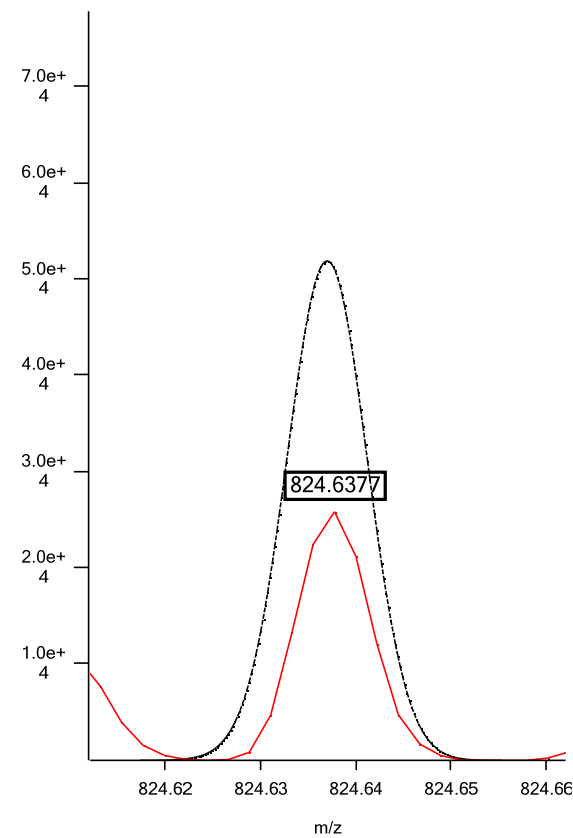



Positive ESI: PC 40:4; C<sub>48</sub>H<sub>89</sub>NO<sub>8</sub>P; theoretical *m/z* 838.6326, (M+H)<sup>+</sup>; isotopic fit 0.0028

### Isotope 1

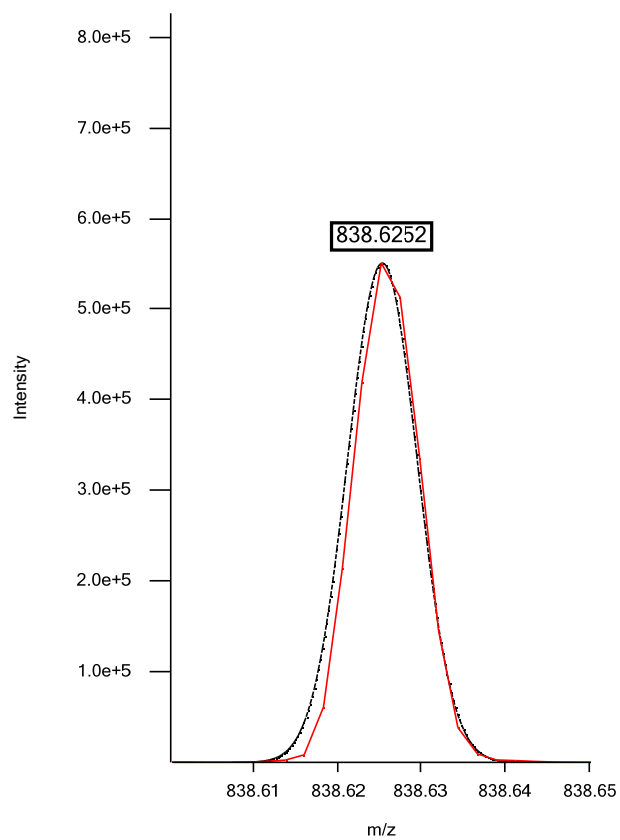

### Isotope 2

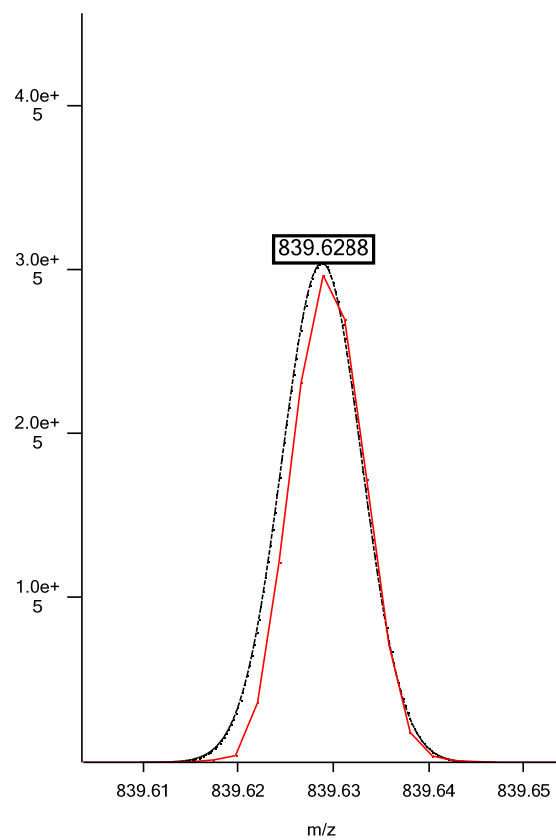

### Isotope 3

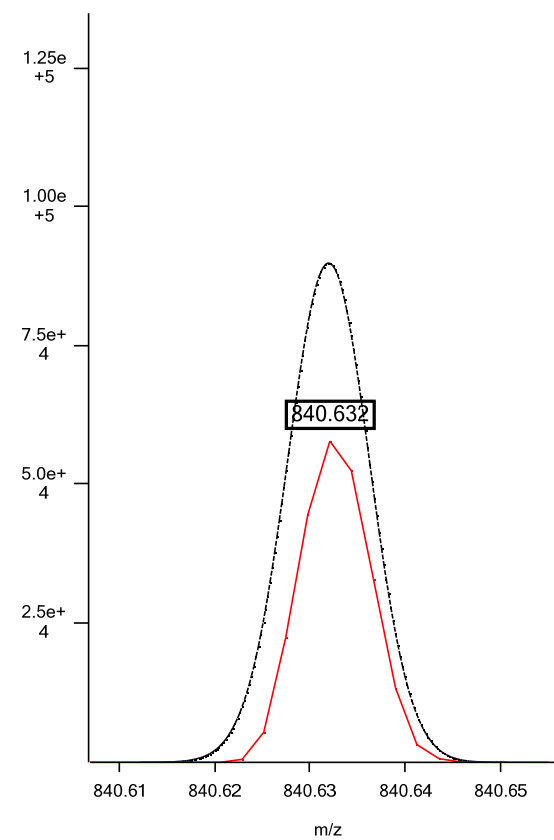

Positive ESI: PC 18:1p/22:3 or 18:0e/22:4;  $C_{48}H_{91}NO_7P$ ; theoretical  $m/z$  824.6533,  $(M+H)^+$ ; isotopic fit 0.0076

### Isotope 1

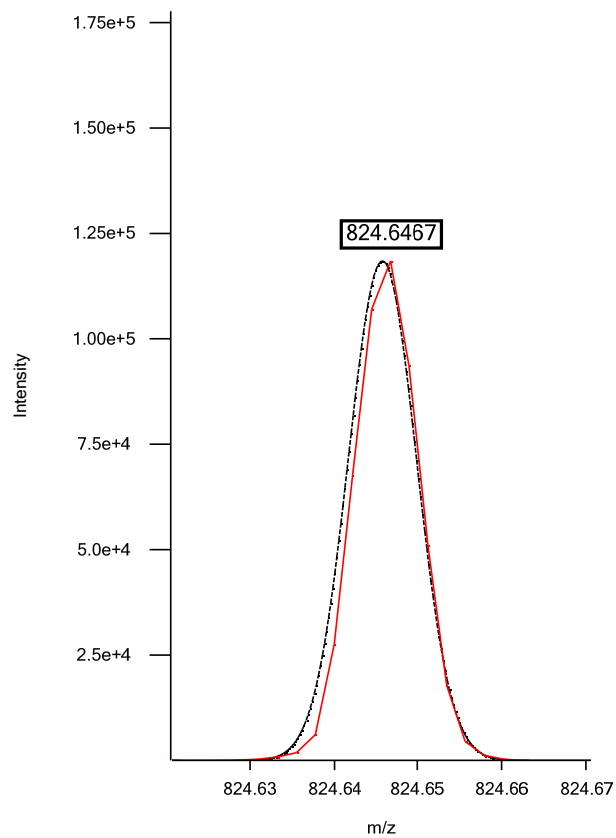

### Isotope 2

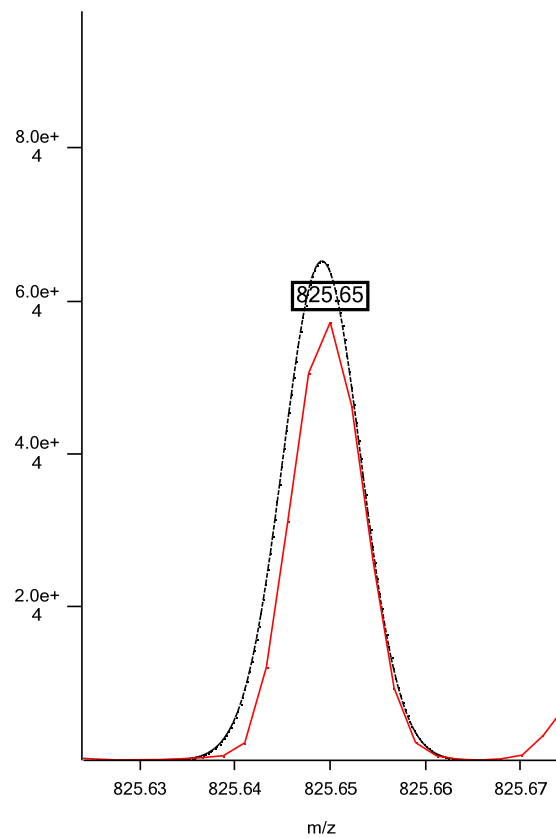

### Isotope 3

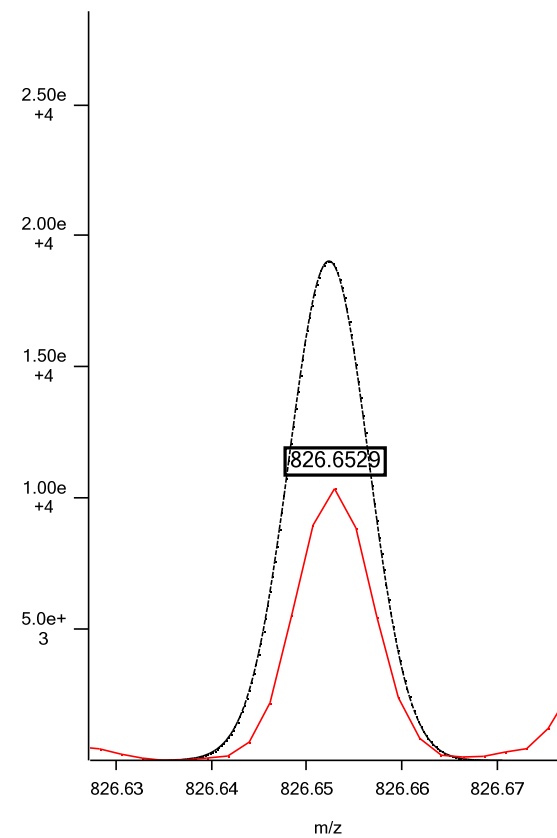

Positive ESI: PC 18:1p/22:2 or 18:0e/22:3; C<sub>48</sub>H<sub>93</sub>NO<sub>7</sub>P; theoretical *m/z* 826.6689, (M+H)<sup>+</sup>; isotopic fit 0.0119

### Isotope 1

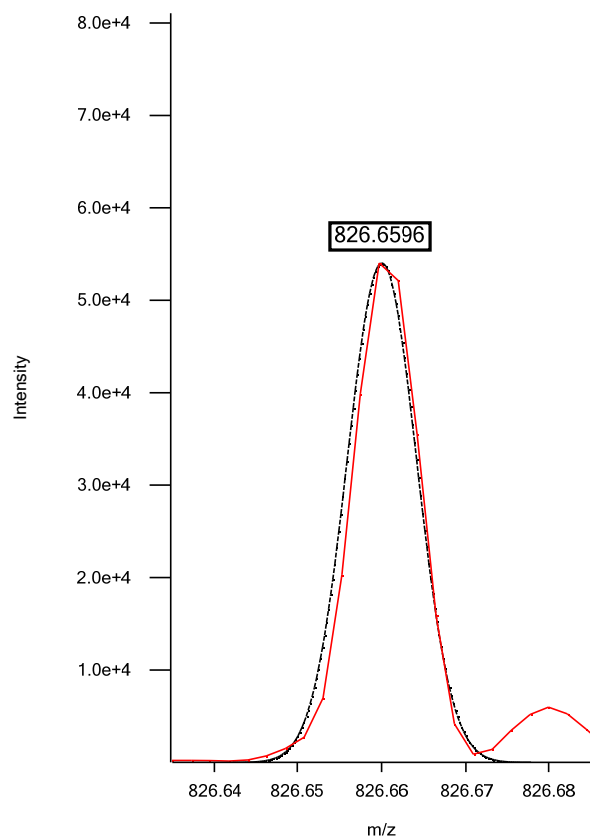

### Isotope 2

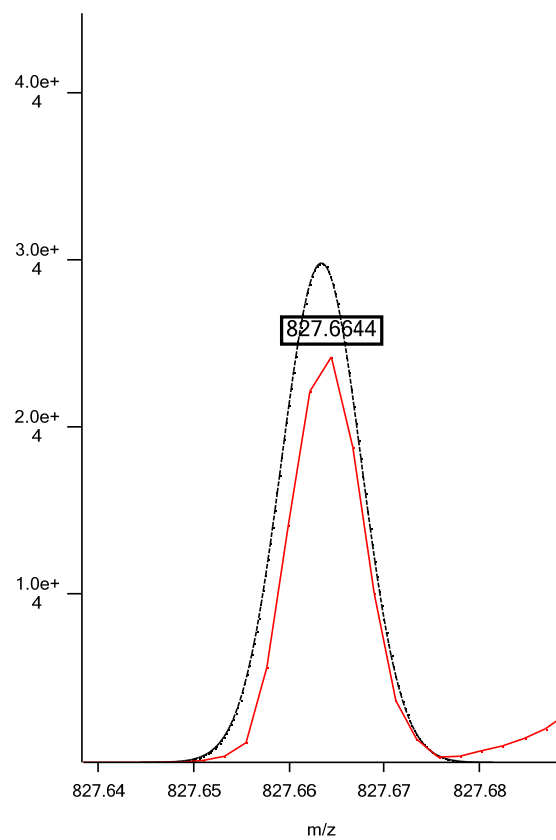

### Isotope 3

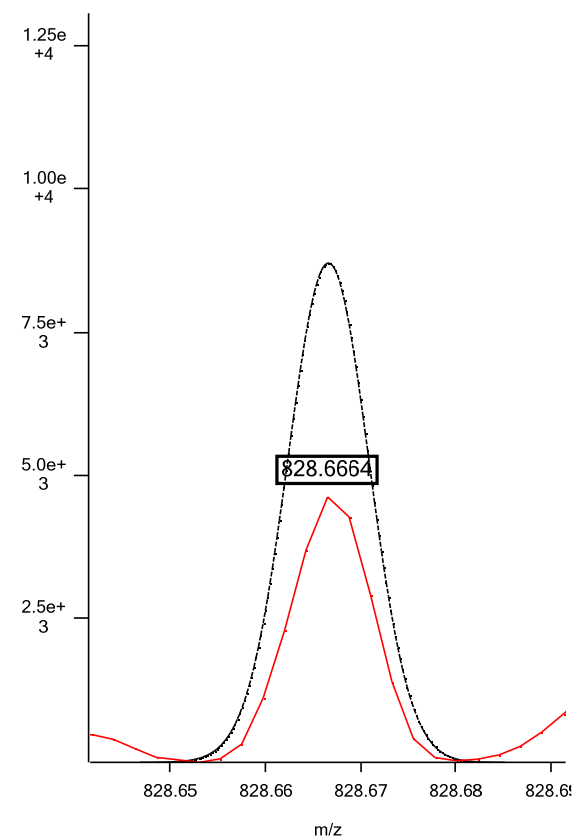

Negative ESI: PC 40:9; C<sub>50</sub>H<sub>81</sub>NO<sub>10</sub>P; theoretical *m/z* 886.5598, (M-H)<sup>-</sup>; isotopic fit 0.0040

### Isotope 1

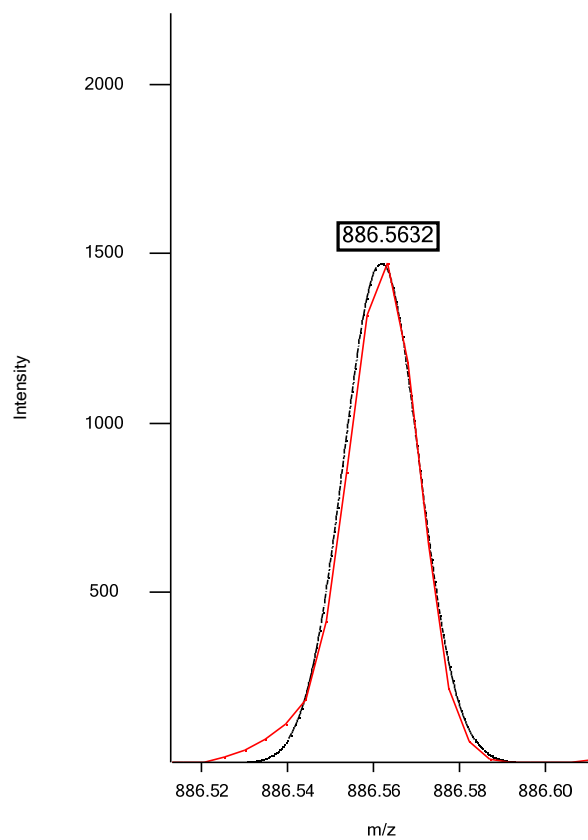

### Isotope 2

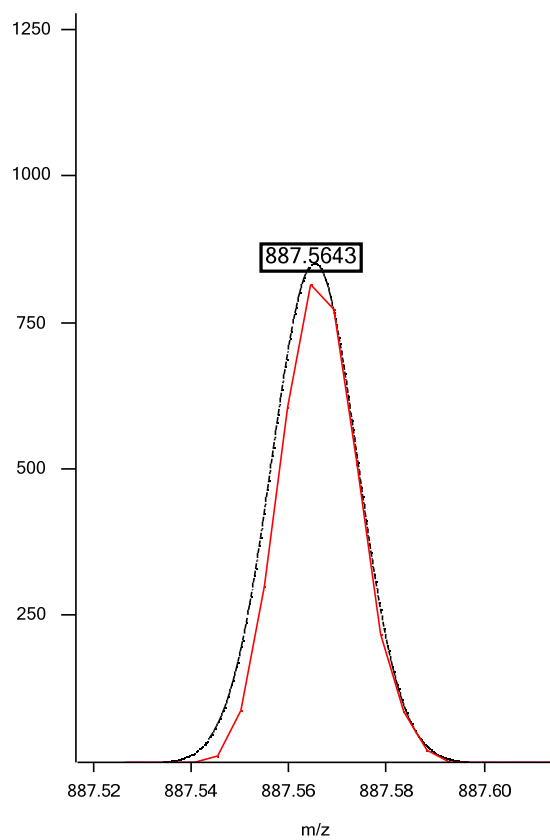

### Isotope 3

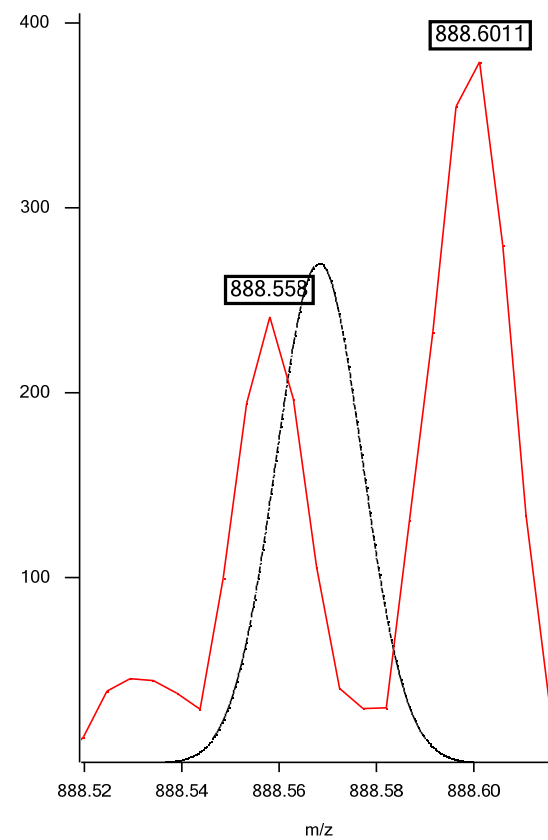

Positive ESI: PC 42:2; C<sub>50</sub>H<sub>97</sub>NO<sub>8</sub>P; theoretical *m/z* 870.6951, (M+H)<sup>+</sup>; isotopic fit 0.0235

### Isotope 1

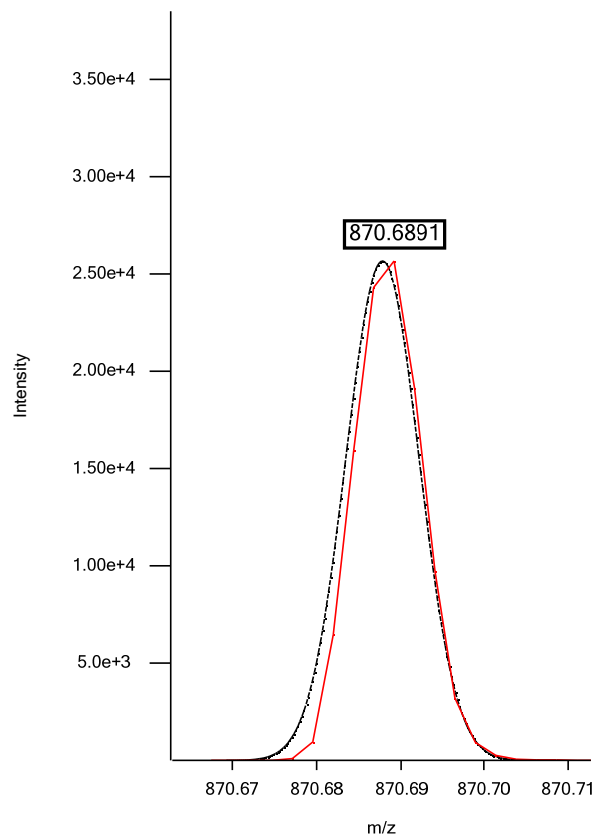

### Isotope 2

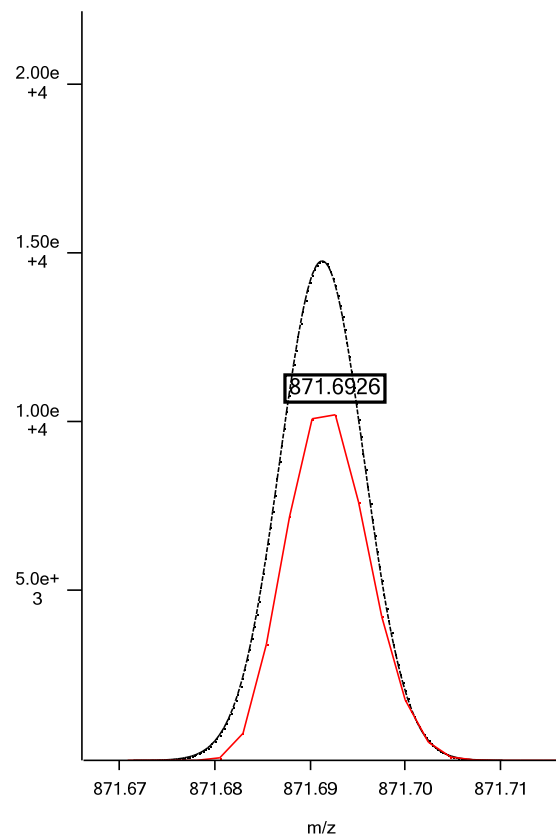

### Isotope 3

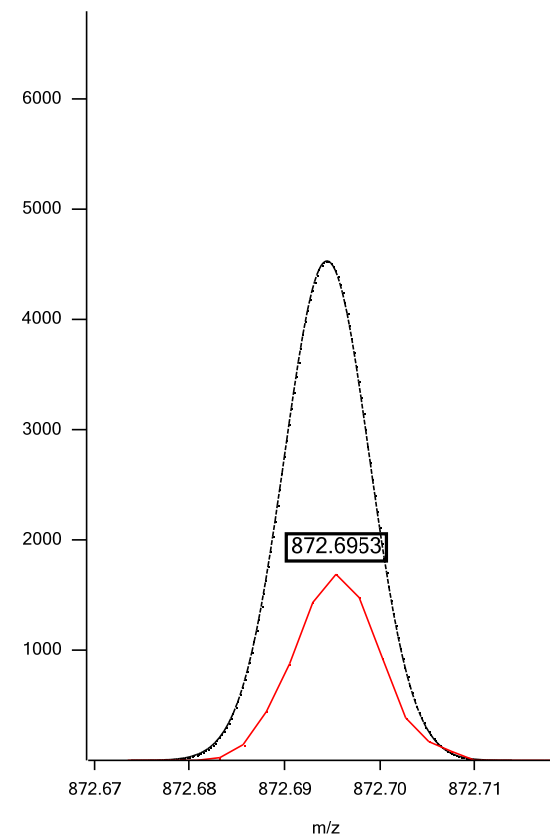

Positive ESI: PC 42:1; C<sub>50</sub>H<sub>99</sub>NO<sub>8</sub>P; theoretical  $m/z$  872.7108, (M+H)<sup>+</sup>; isotopic fit 0.0318

C50H99NO8P\_872.7108\_42-1\_PC.txt

### Isotope 1

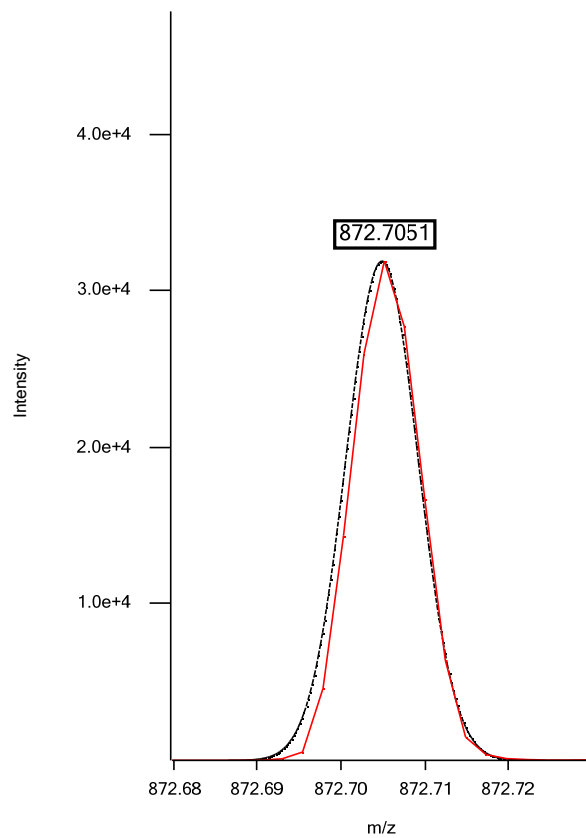

### Isotope 2

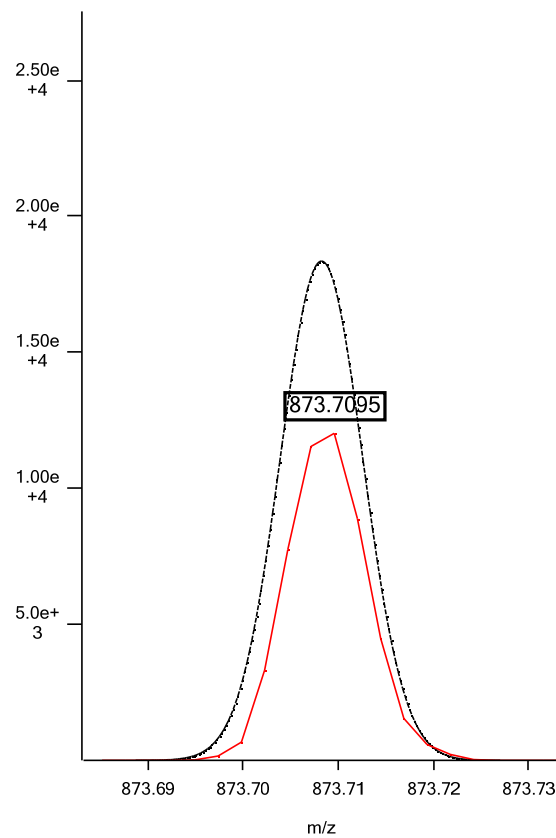

### Isotope 3

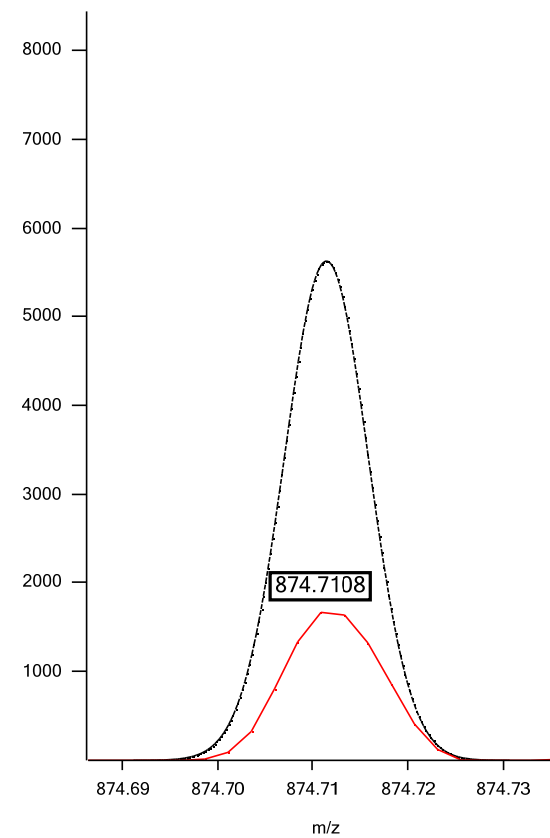

# Sphingomyelins

Positive ESI: SM d16:1/16:0; C<sub>37</sub>H<sub>76</sub>N<sub>2</sub>O<sub>6</sub>P; theoretical  $m/z$  675.5441, (M+H)<sup>+</sup>; isotopic fit 0.0065

### Isotope 1

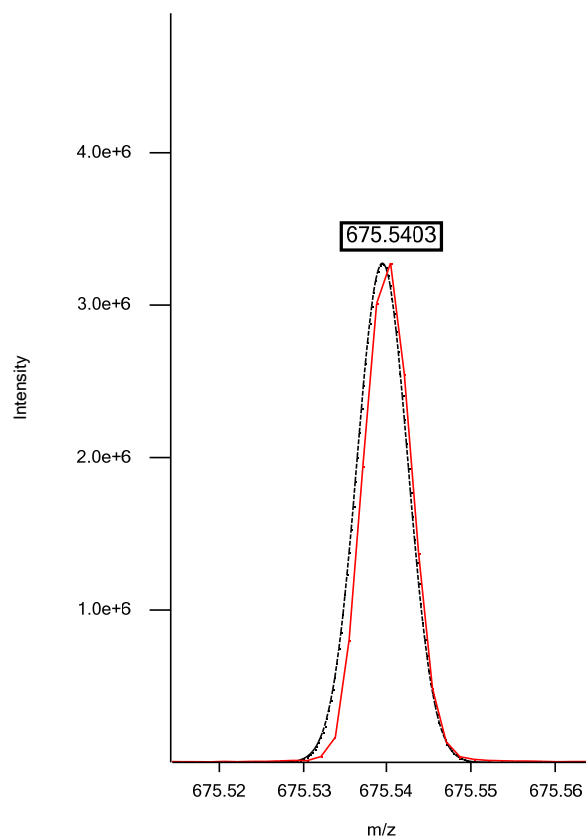

### Isotope 2

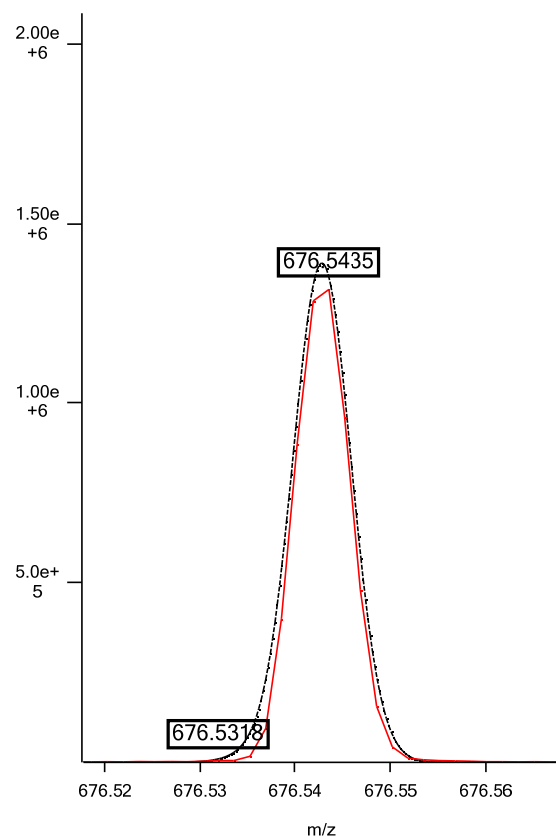

### Isotope 3

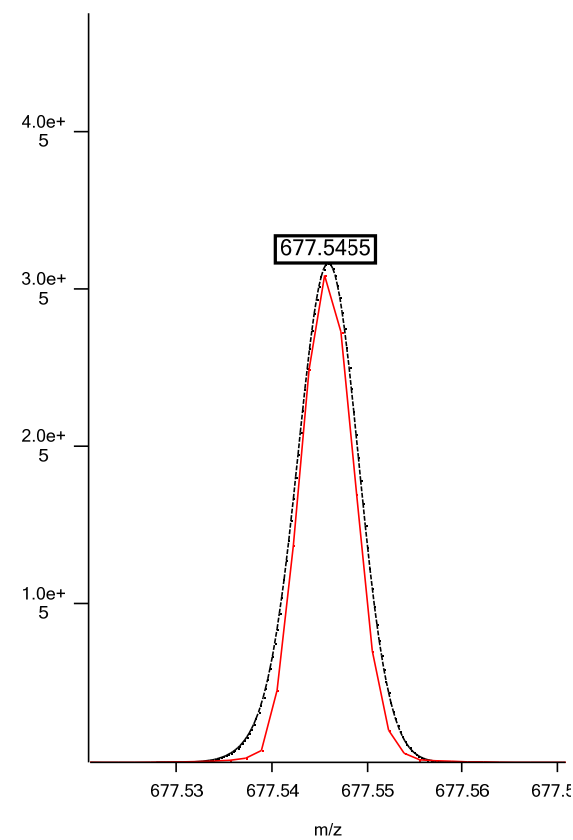



Positive ESI: SM d16:1/17:0; C<sub>38</sub>H<sub>78</sub>N<sub>2</sub>O<sub>6</sub>P; theoretical  $m/z$  689.5597, (M+H)<sup>+</sup>; isotopic fit 0.0098

### Isotope 1

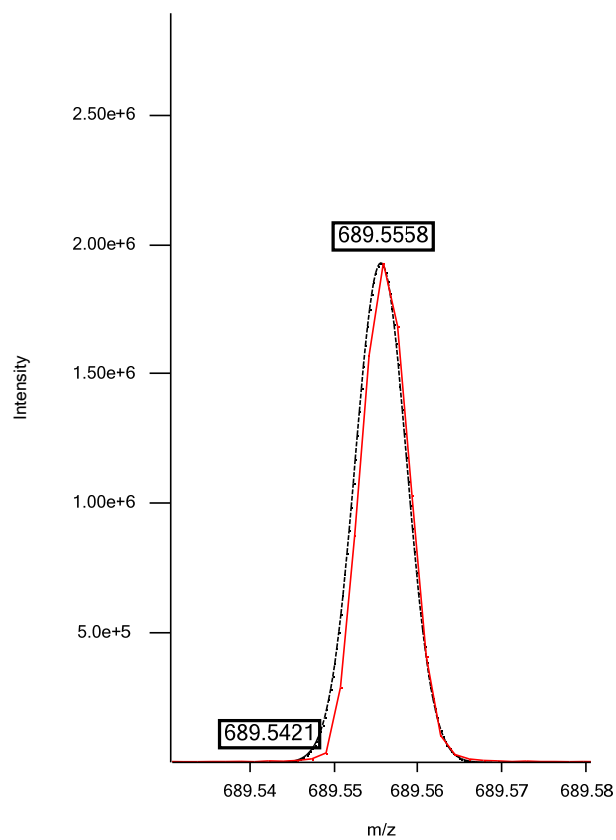

### Isotope 2

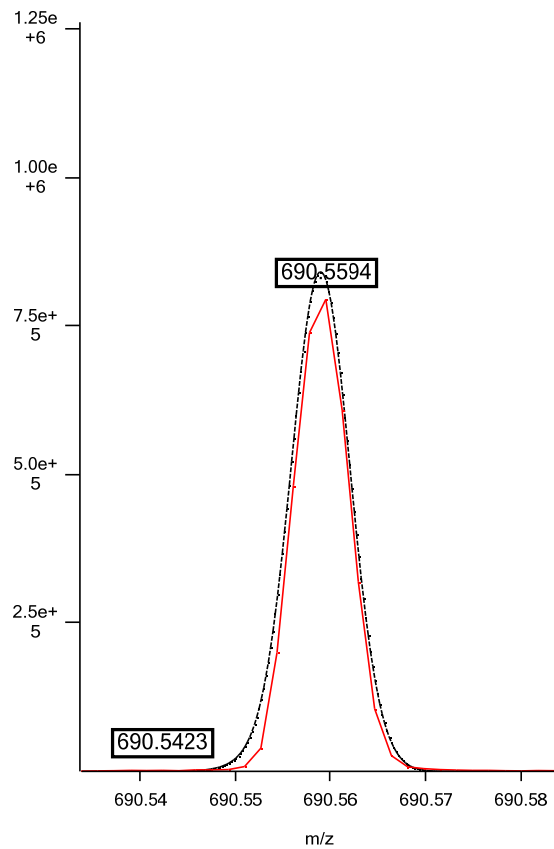

### Isotope 3

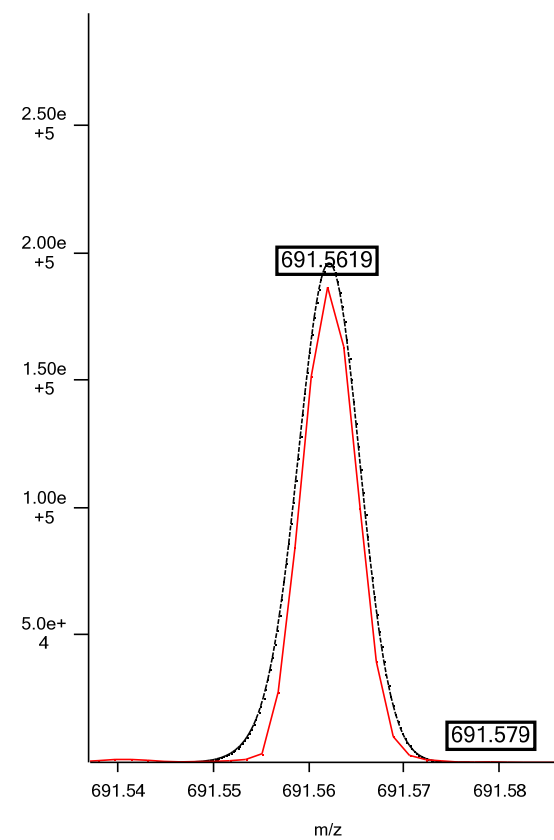

Positive ESI: SM d16:1/18:1; C<sub>39</sub>H<sub>78</sub>N<sub>2</sub>O<sub>6</sub>P; theoretical  $m/z$  701.5597, (M+H)<sup>+</sup>; isotopic fit 0.0058

### Isotope 1

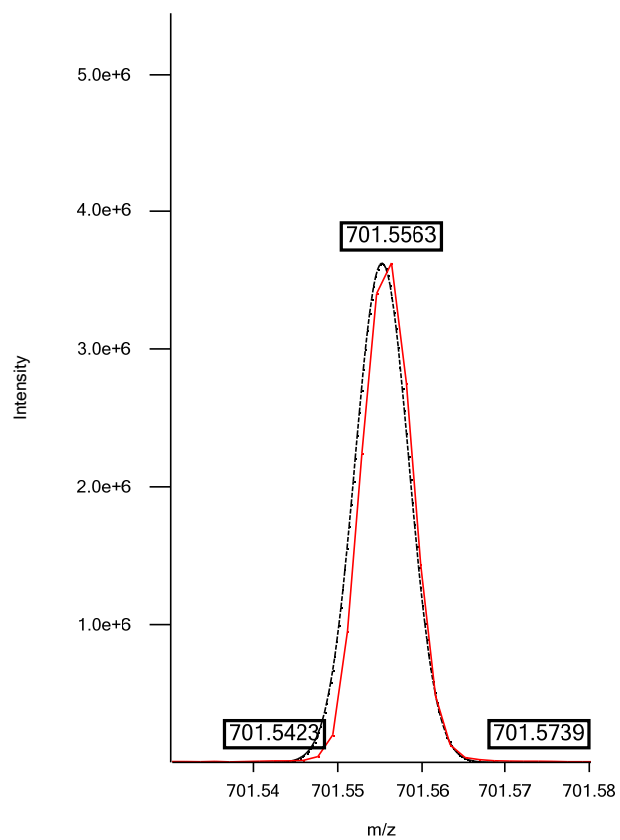

### Isotope 2

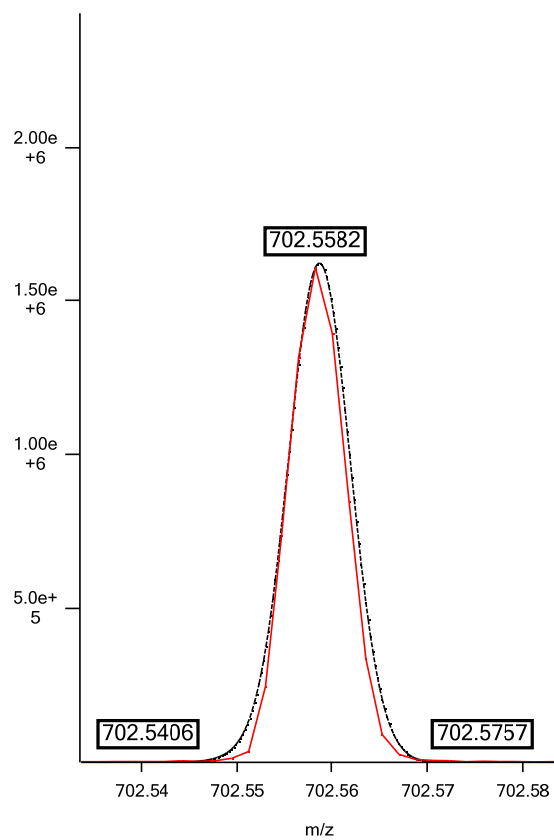

### Isotope 3

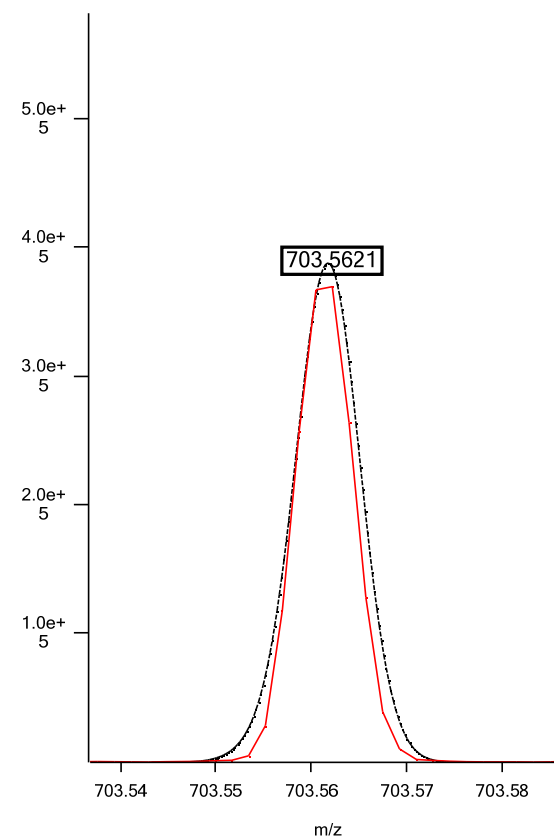

Positive ESI: SM d16:1/18:0; C<sub>39</sub>H<sub>80</sub>N<sub>2</sub>O<sub>6</sub>P; theoretical  $m/z$  703.5754, (M+H)<sup>+</sup>; isotopic fit 0.0168

### Isotope 1

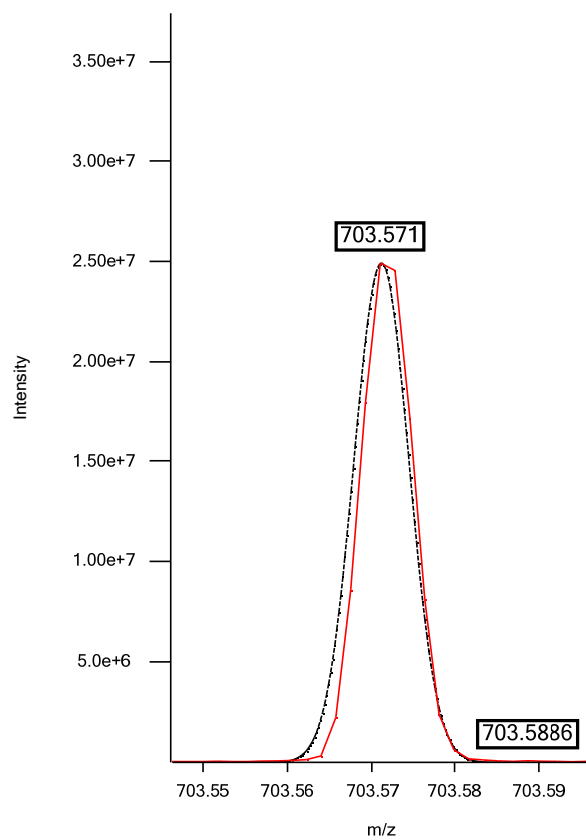

### Isotope 2

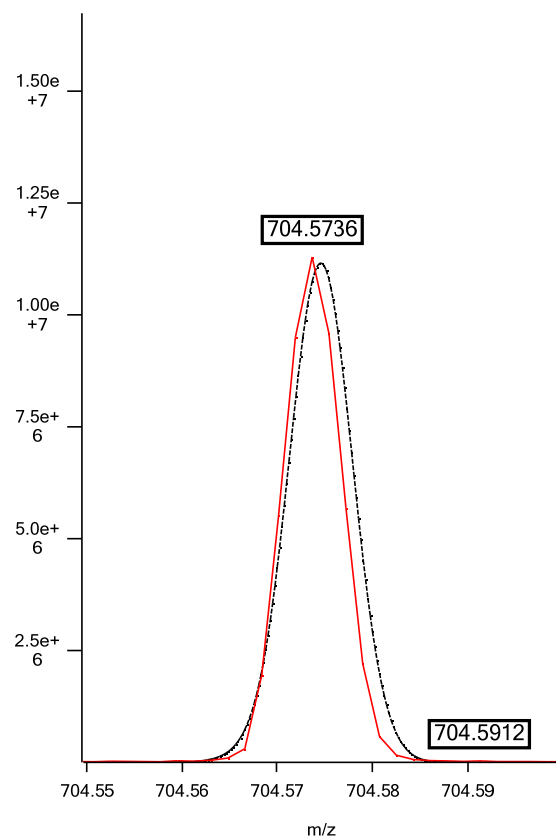

### Isotope 3

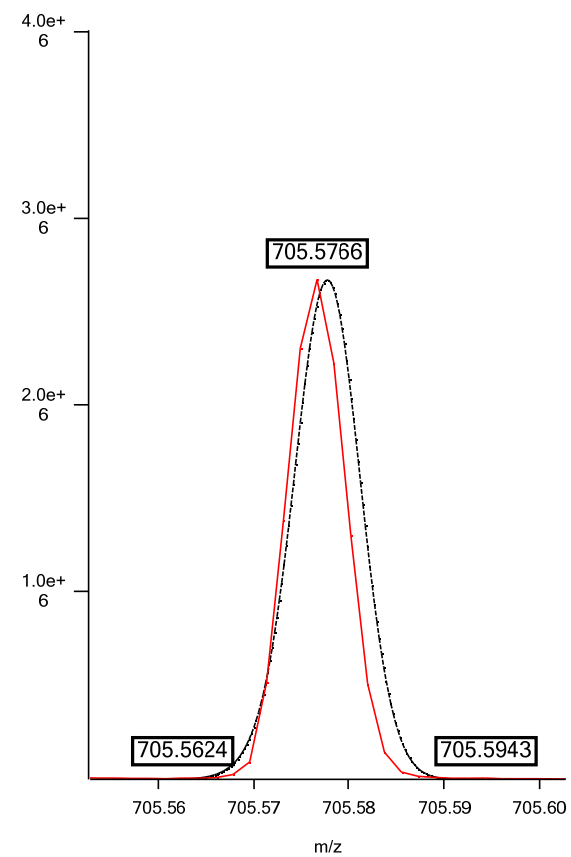

Positive ESI: SM d18:1/18:2; C<sub>41</sub>H<sub>80</sub>N<sub>2</sub>O<sub>6</sub>P; theoretical *m/z* 727.5754, (M+H)<sup>+</sup>; isotopic fit 0.0033

### Isotope 1

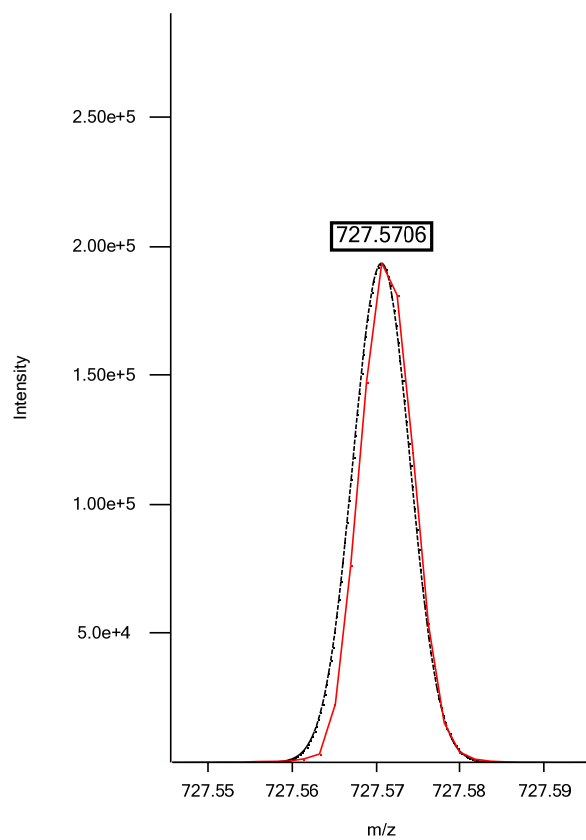

### Isotope 2

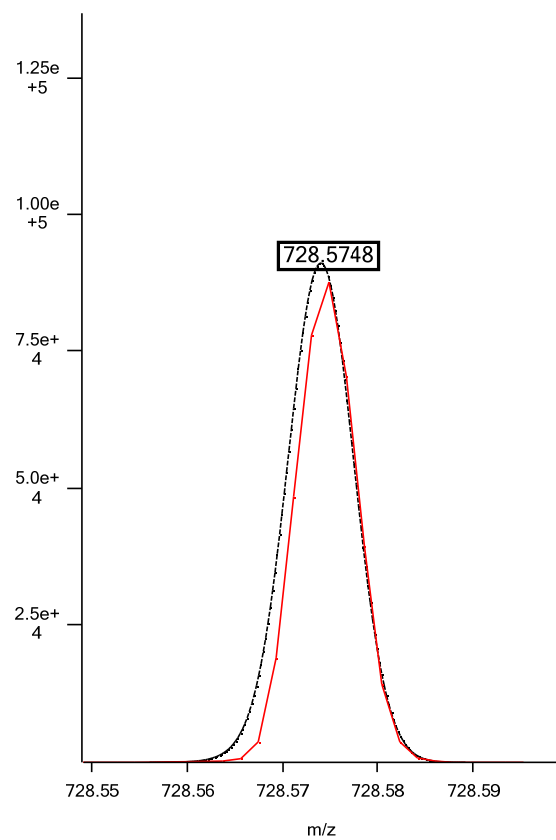

### Isotope 3

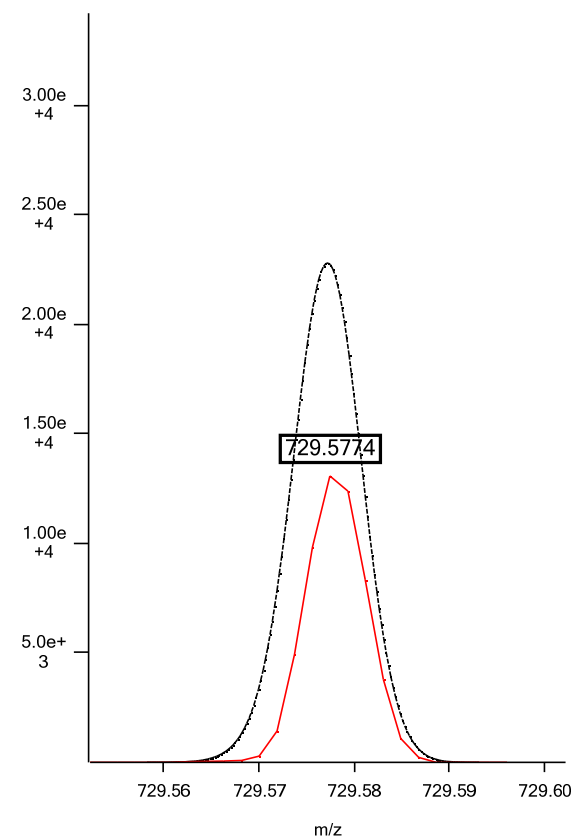

Positive ESI: SM d18:1/18:1; C<sub>41</sub>H<sub>82</sub>N<sub>2</sub>O<sub>6</sub>P; theoretical  $m/z$  729.5910, (M+H)<sup>+</sup>; isotopic fit 0.0028

### Isotope 1

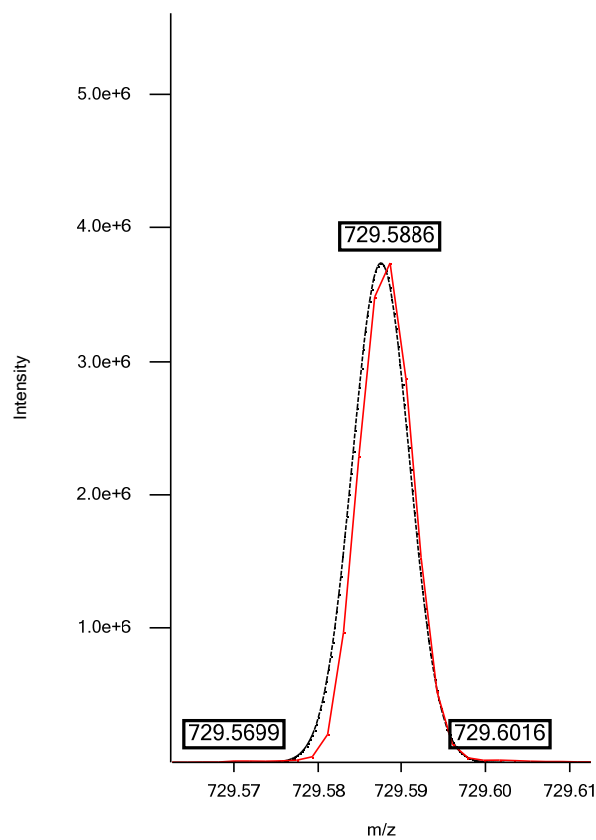

### Isotope 2

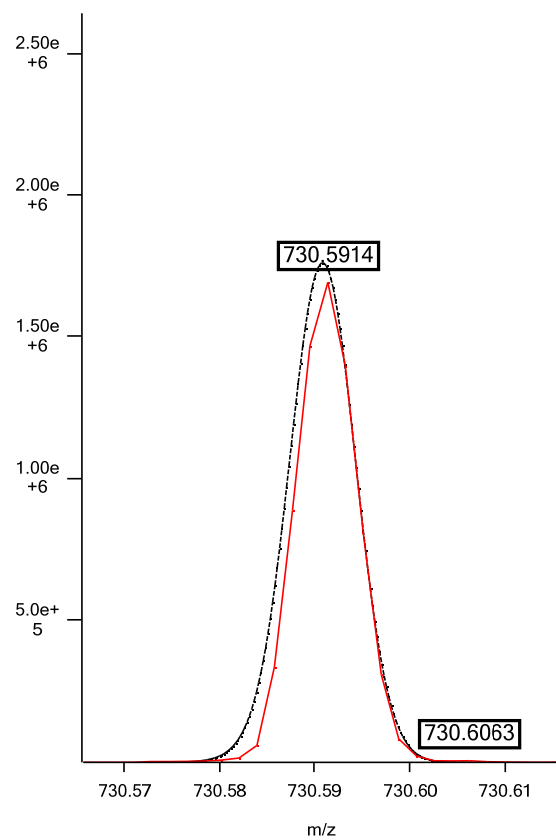

### Isotope 3

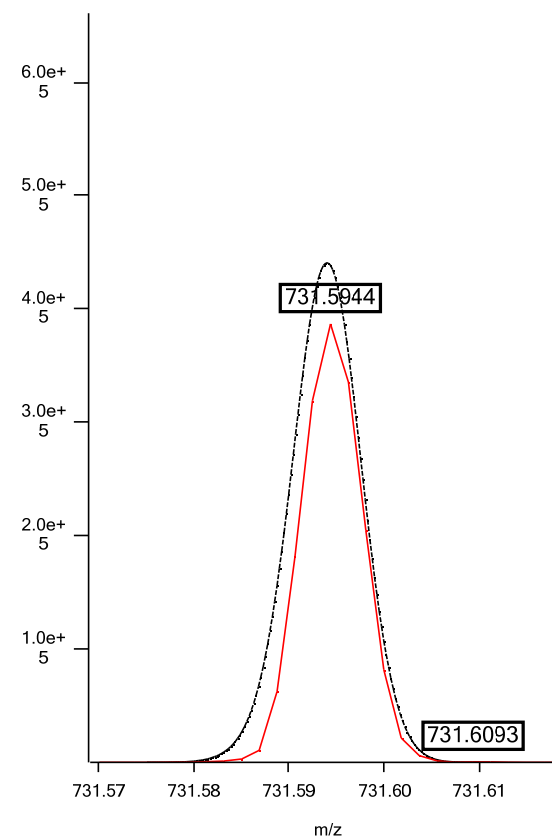

Positive ESI: SM d18:1/18:0; C<sub>41</sub>H<sub>84</sub>N<sub>2</sub>O<sub>6</sub>P; theoretical *m/z* 731.6067, (M+H)<sup>+</sup>; isotopic fit 0.0032

### Isotope 1

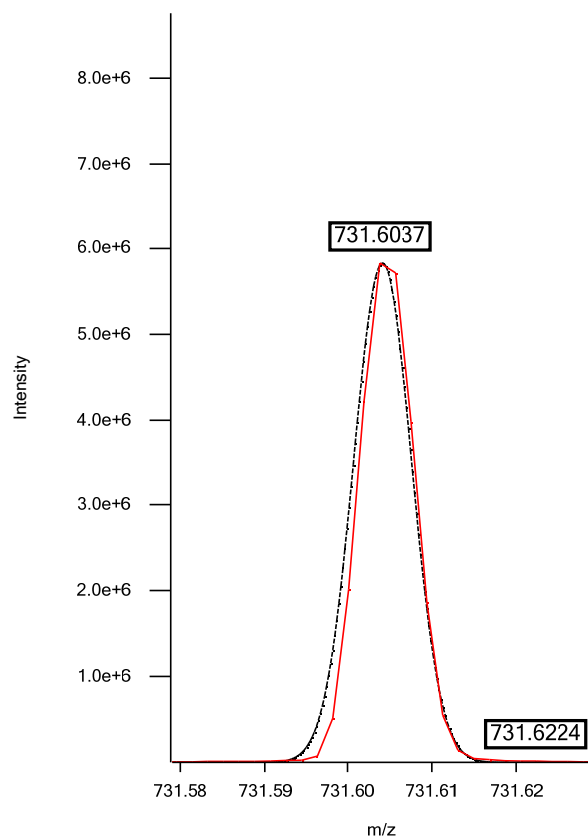

### Isotope 2

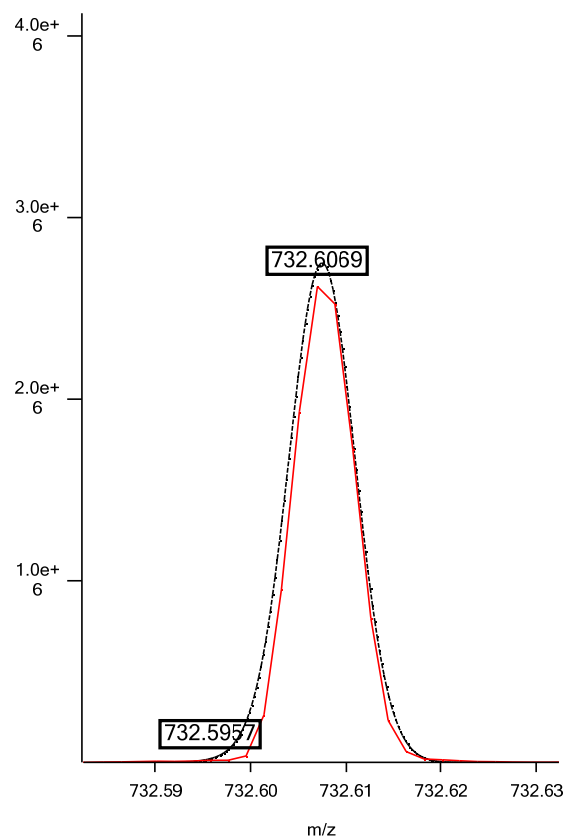

### Isotope 3

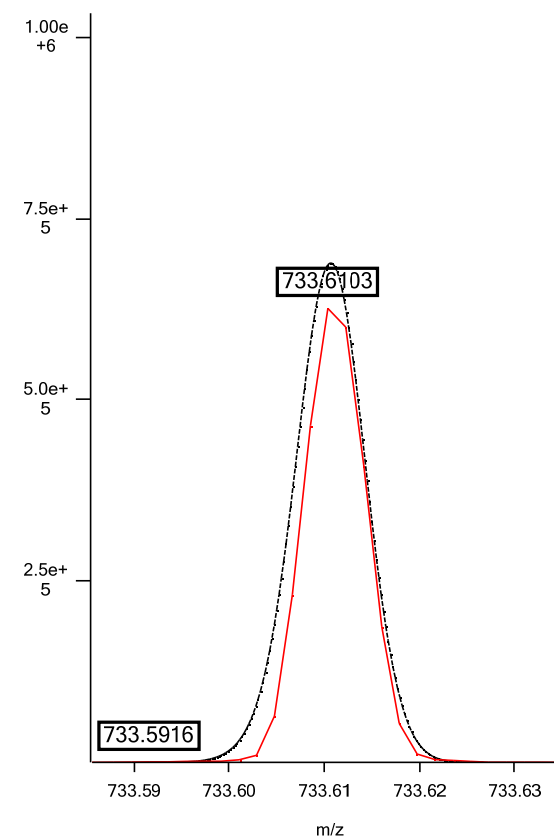

Positive ESI: SM d18:1/20:1; C<sub>43</sub>H<sub>86</sub>N<sub>2</sub>O<sub>6</sub>P; theoretical *m/z* 757.6223, (M+H)<sup>+</sup>; isotopic fit 0.0135

### Isotope 1

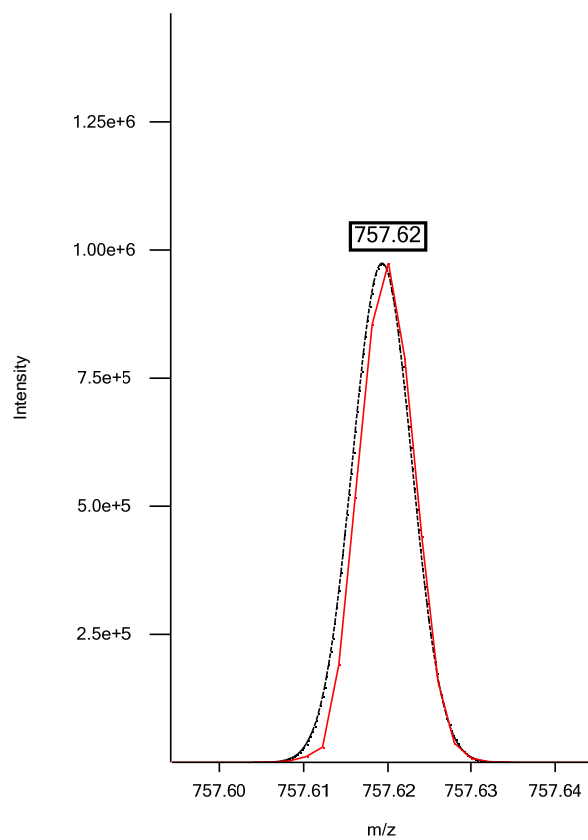

### Isotope 2

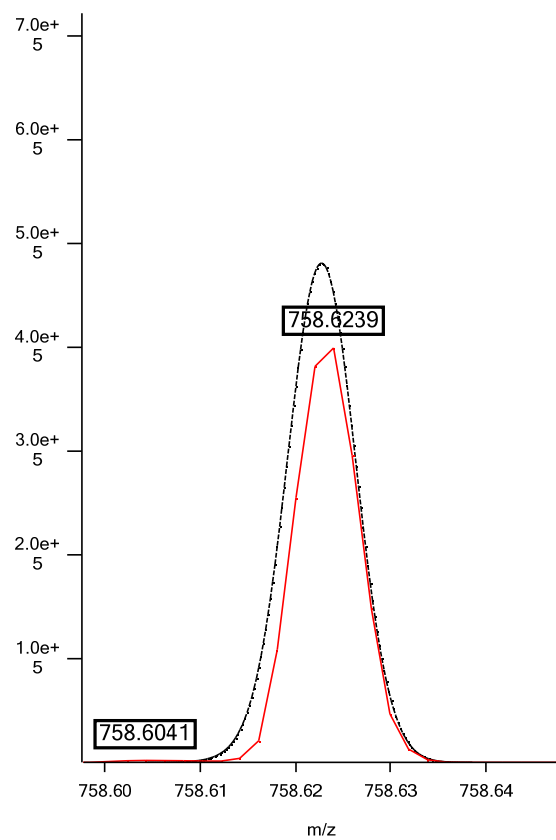

### Isotope 3

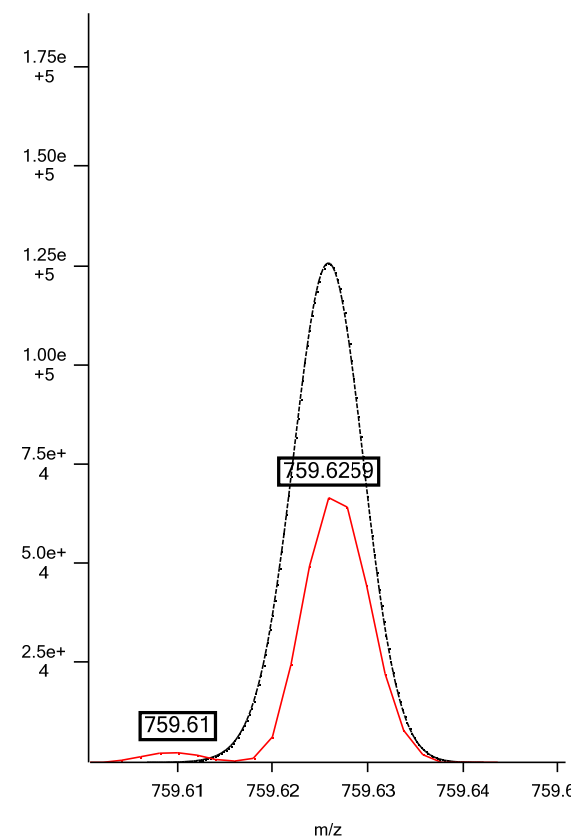

Positive ESI: SM d18:1/20:0; C<sub>43</sub>H<sub>88</sub>N<sub>2</sub>O<sub>6</sub>P; theoretical  $m/z$  759.6380, (M+H)<sup>+</sup>; isotopic fit 0.0052

### Isotope 1

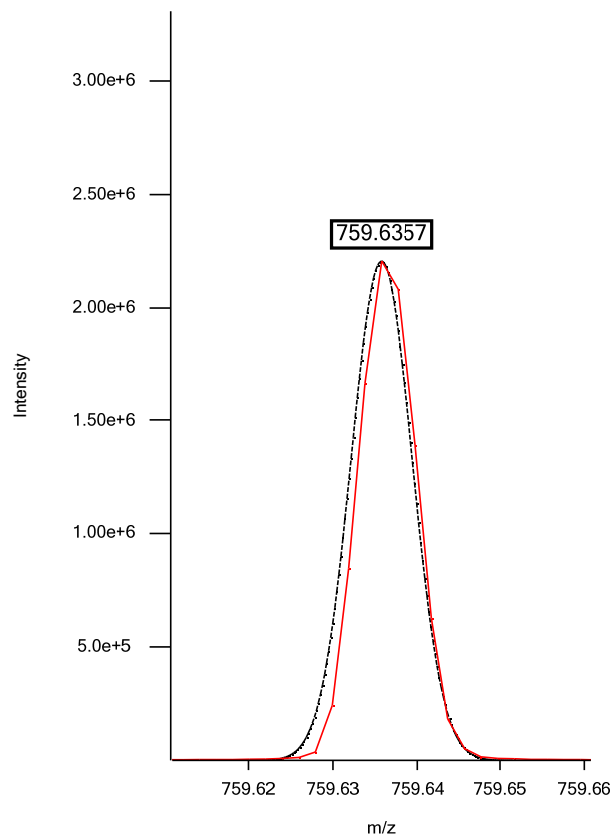

### Isotope 2

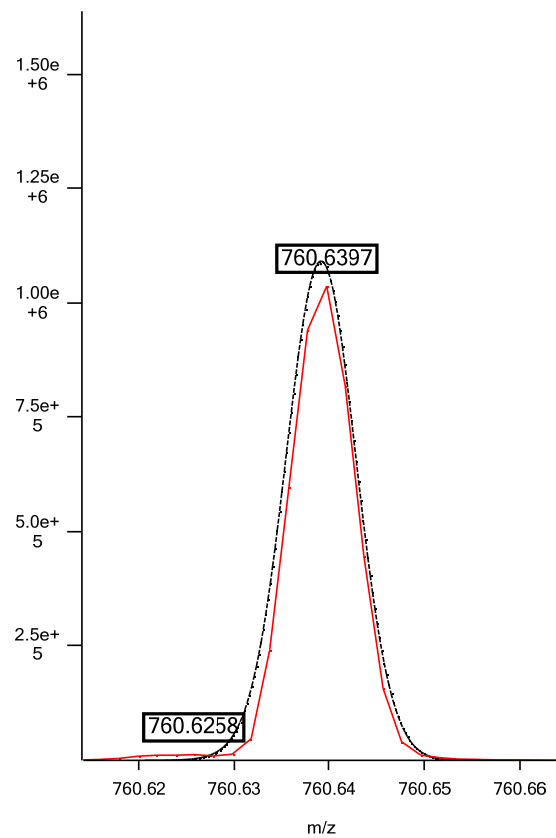

### Isotope 3

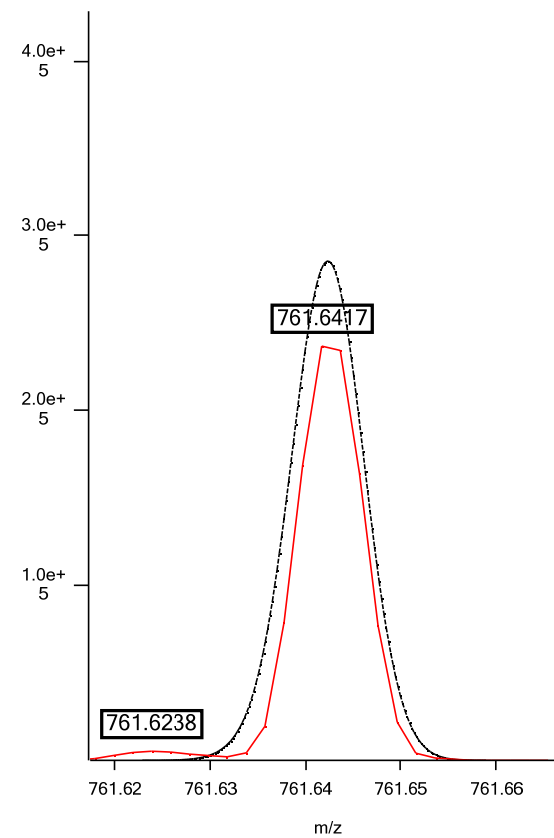



Positive ESI: SM d16:1/24:1; C<sub>45</sub>H<sub>90</sub>N<sub>2</sub>O<sub>6</sub>P; theoretical *m/z* 785.6537, (M+H)<sup>+</sup>; isotopic fit 0.0043

### Isotope 1

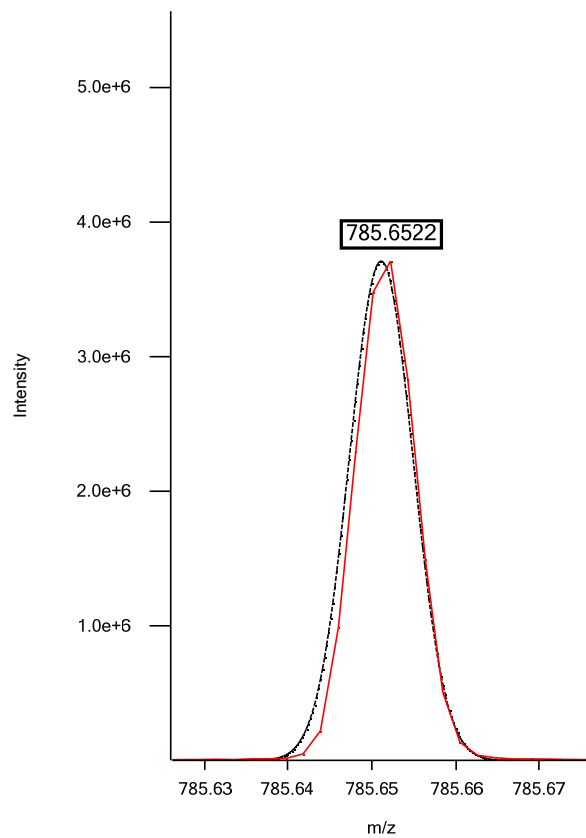

### Isotope 2

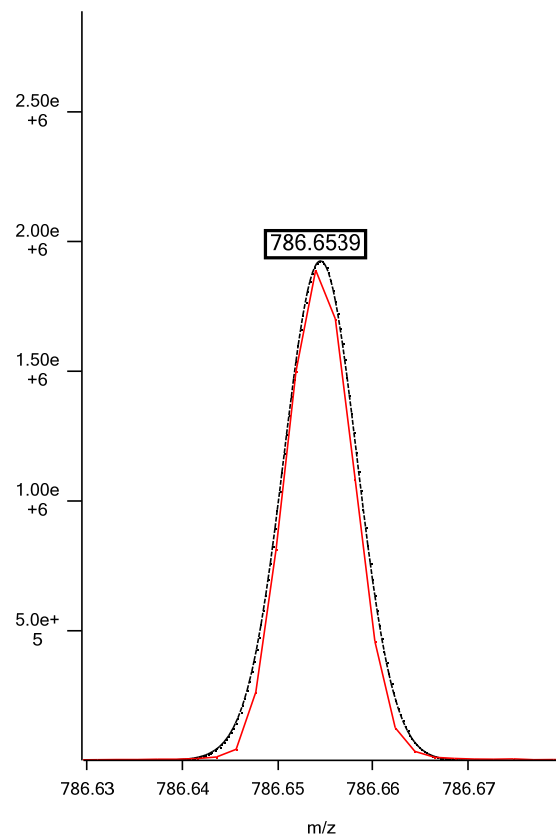

### Isotope 3

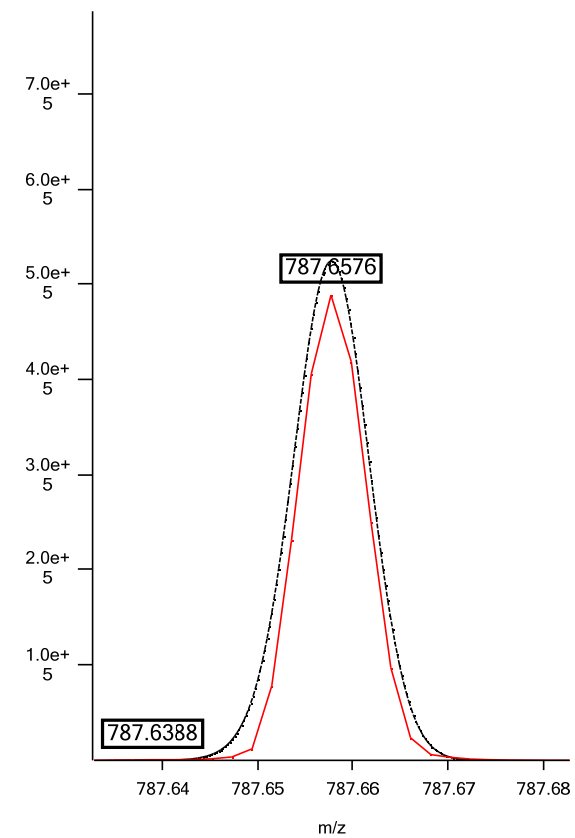

Positive ESI: SM d16:1/24:0; C<sub>45</sub>H<sub>92</sub>N<sub>2</sub>O<sub>6</sub>P; theoretical  $m/z$  787.6693, (M+H)<sup>+</sup>; isotopic fit 0.0090

### Isotope 1

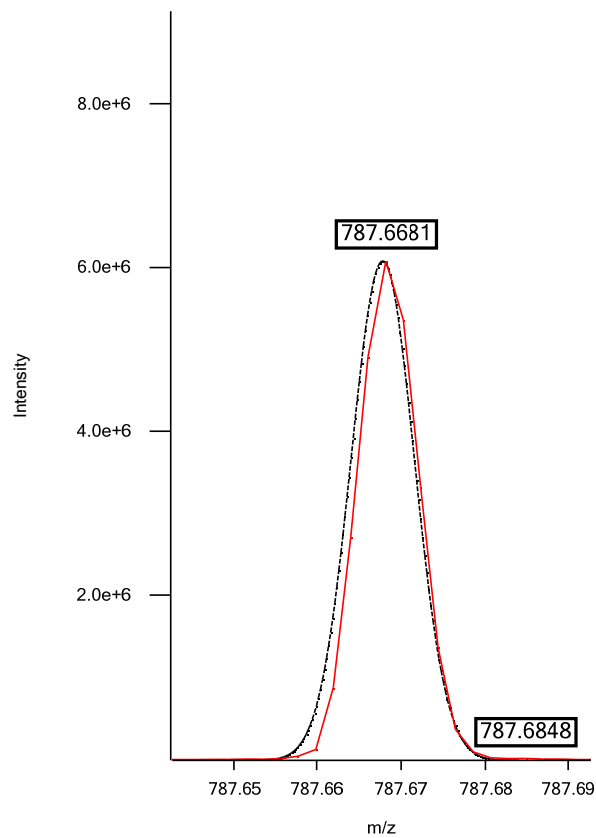

### Isotope 2

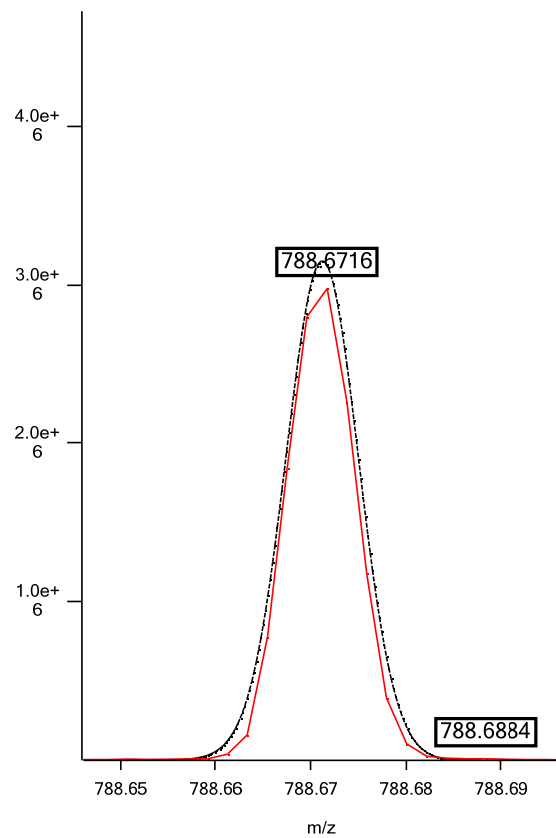

### Isotope 3

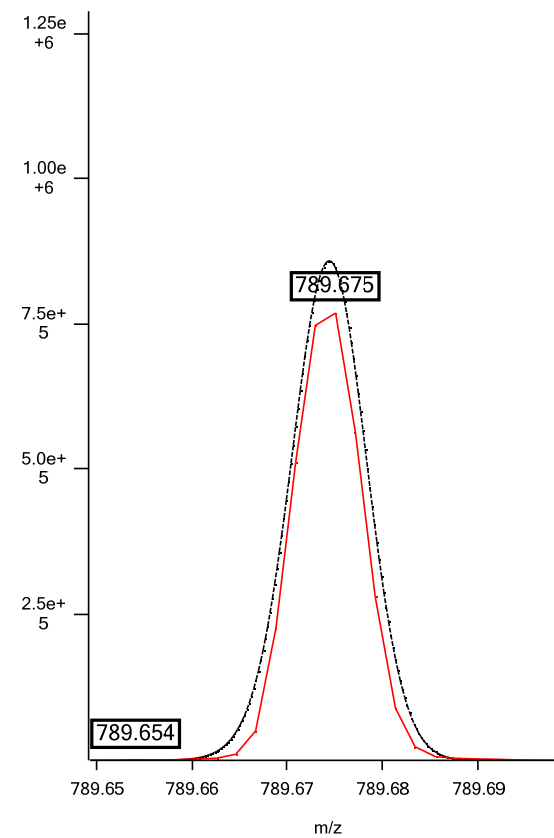

Positive ESI: SM d17:1/24:1; C<sub>46</sub>H<sub>92</sub>N<sub>2</sub>O<sub>6</sub>P; theoretical  $m/z$  799.6693, (M+H)<sup>+</sup>; isotopic fit 0.0074

### Isotope 1

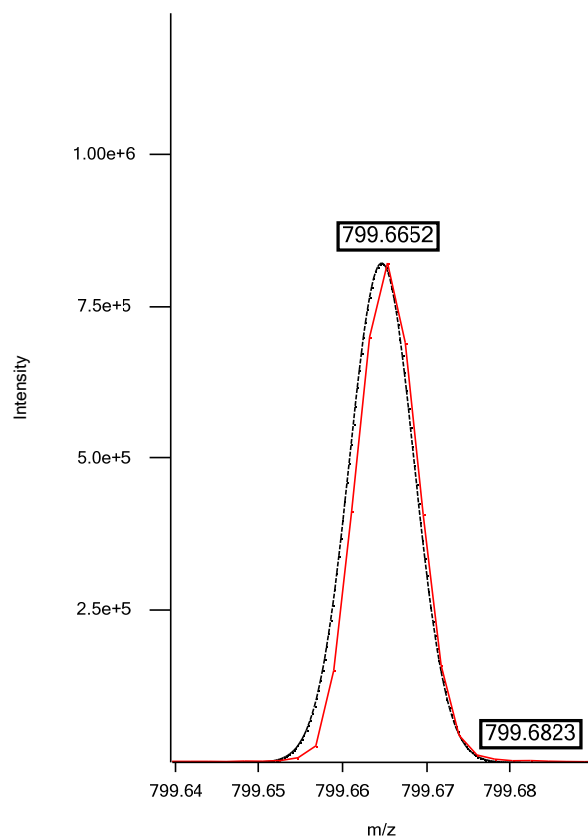

### Isotope 2

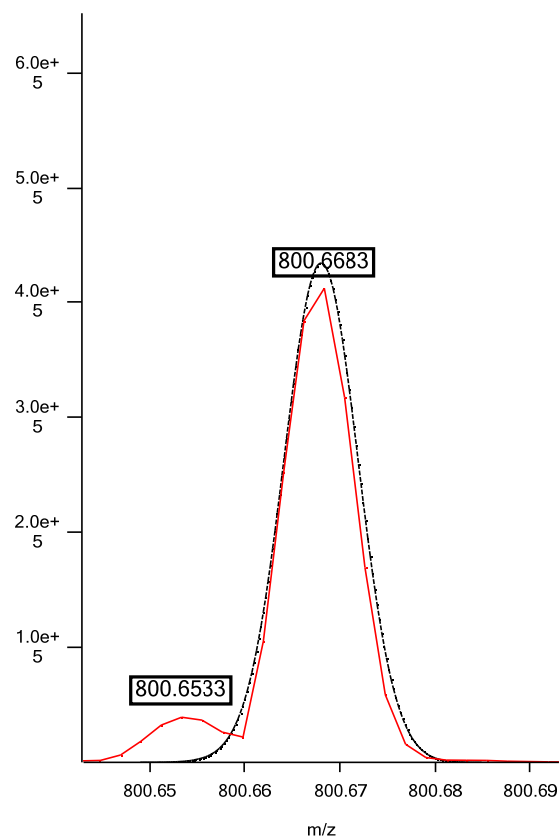

### Isotope 3

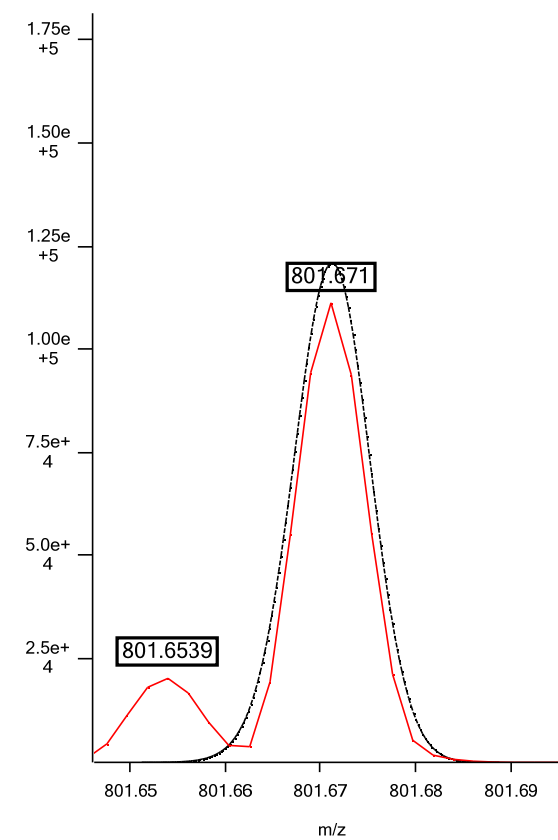

Positive ESI: SM d17:1/24:0; C<sub>46</sub>H<sub>94</sub>N<sub>2</sub>O<sub>6</sub>P; theoretical *m/z* 801.6850, (M+H)<sup>+</sup>; isotopic fit 0.0270

### Isotope 1

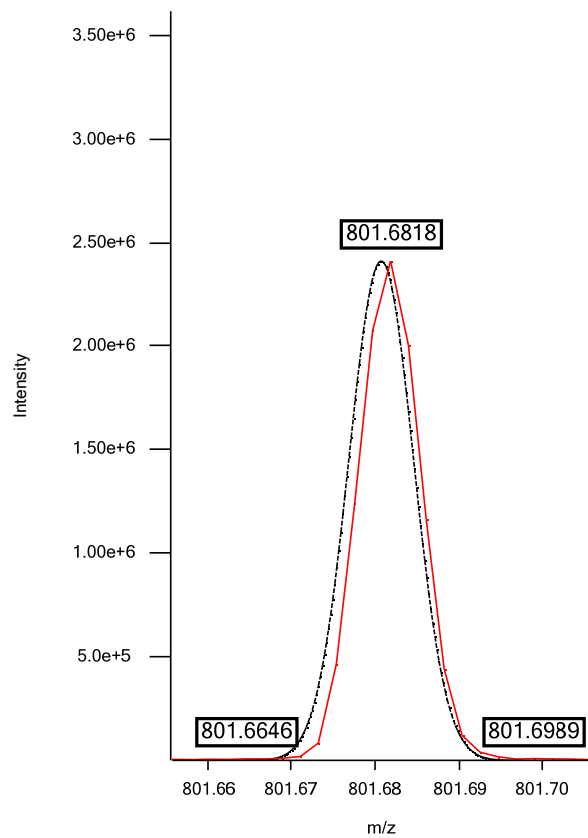

### Isotope 2

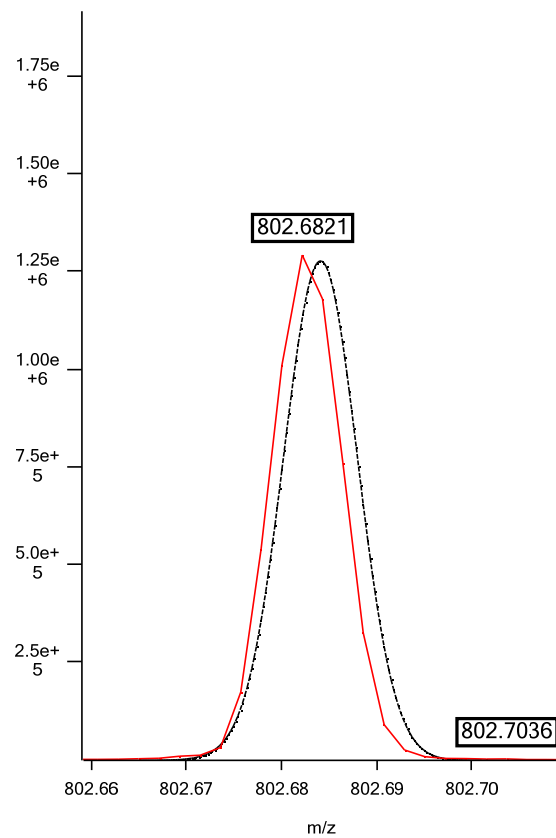

### Isotope 3

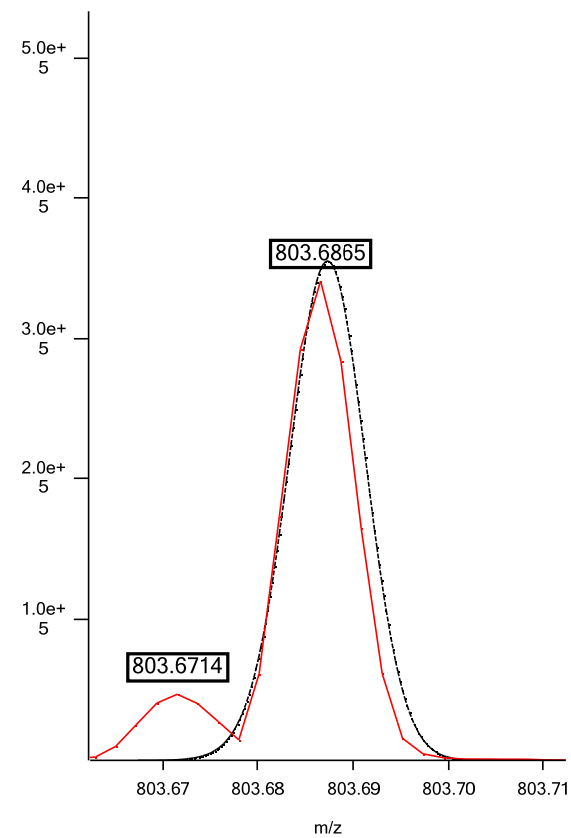

Positive ESI: SM d20:1/22:3; C<sub>47</sub>H<sub>90</sub>N<sub>2</sub>O<sub>6</sub>P; theoretical  $m/z$  809.6536, (M+H)<sup>+</sup>; isotopic fit 0.0082

### Isotope 1

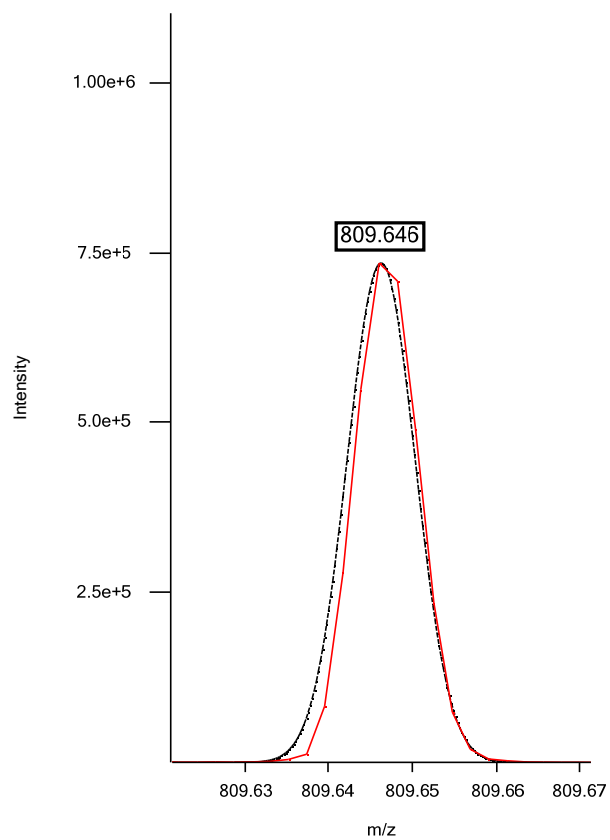

### Isotope 2

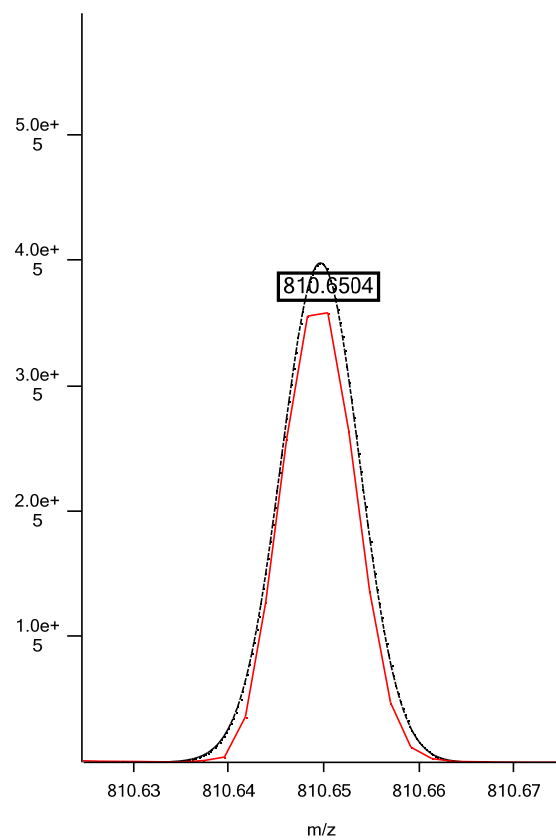

### Isotope 3

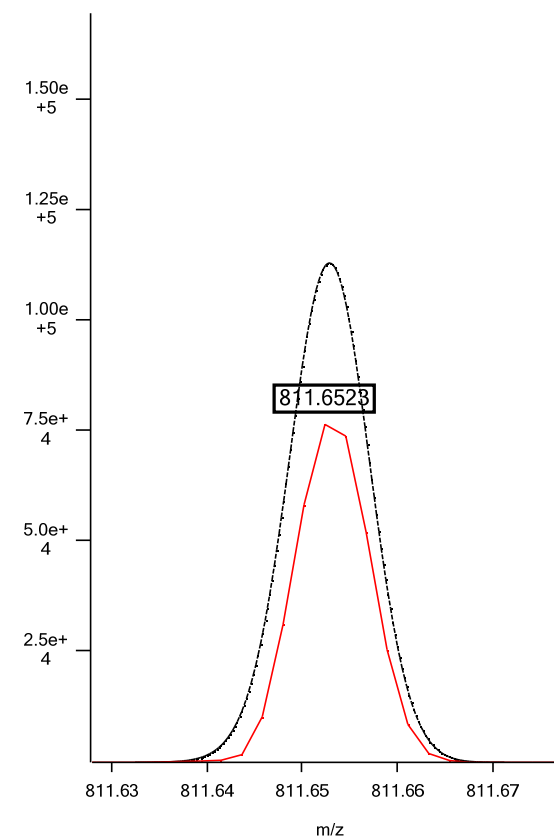

Positive ESI: SM d18:1/24:2; C<sub>47</sub>H<sub>92</sub>N<sub>2</sub>O<sub>6</sub>P; theoretical  $m/z$  811.6693, (M+H)<sup>+</sup>; isotopic fit 0.0088

### Isotope 1

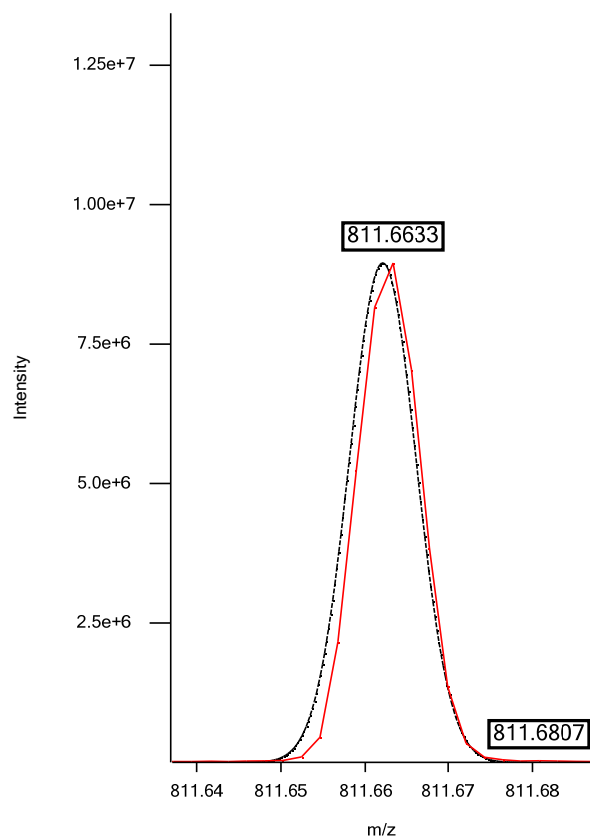

### Isotope 2

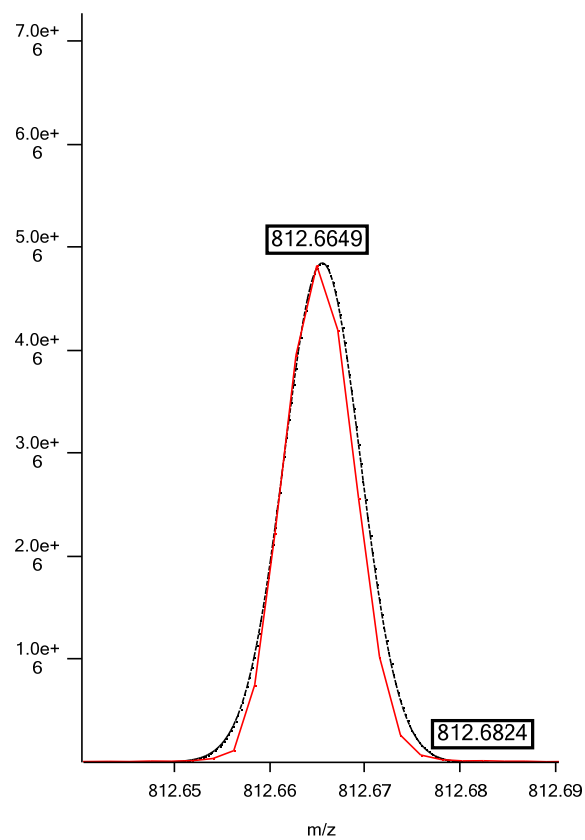

### Isotope 3

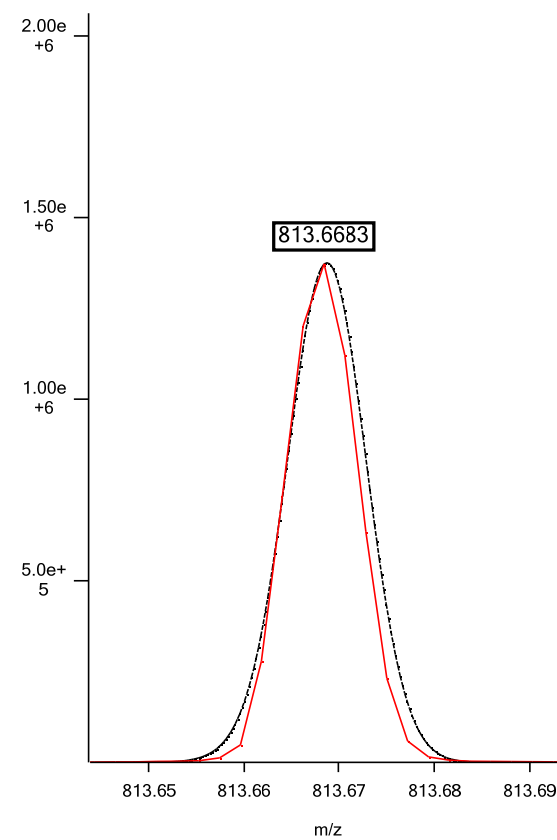

Positive ESI: SM d18:1/24:1; C<sub>47</sub>H<sub>94</sub>N<sub>2</sub>O<sub>6</sub>P; theoretical  $m/z$  813.6849, (M+H)<sup>+</sup>; isotopic fit 0.0177

### Isotope 1

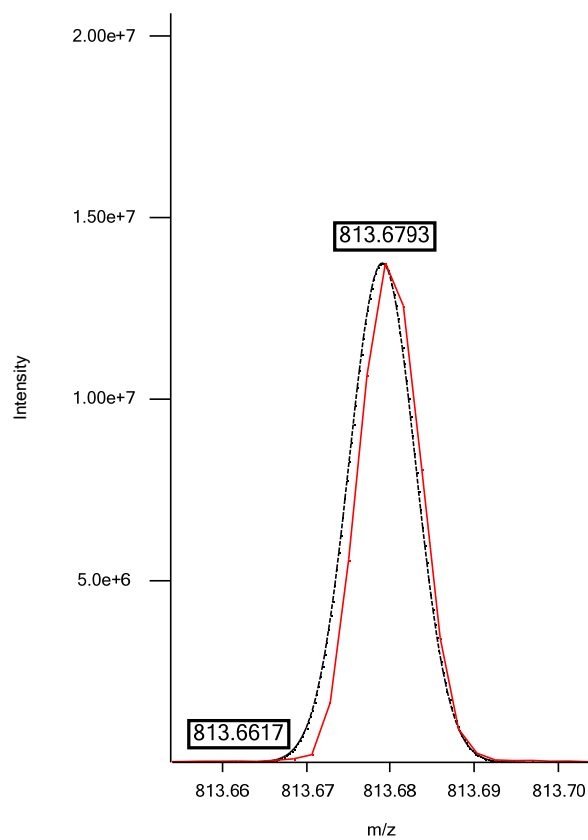

### Isotope 2

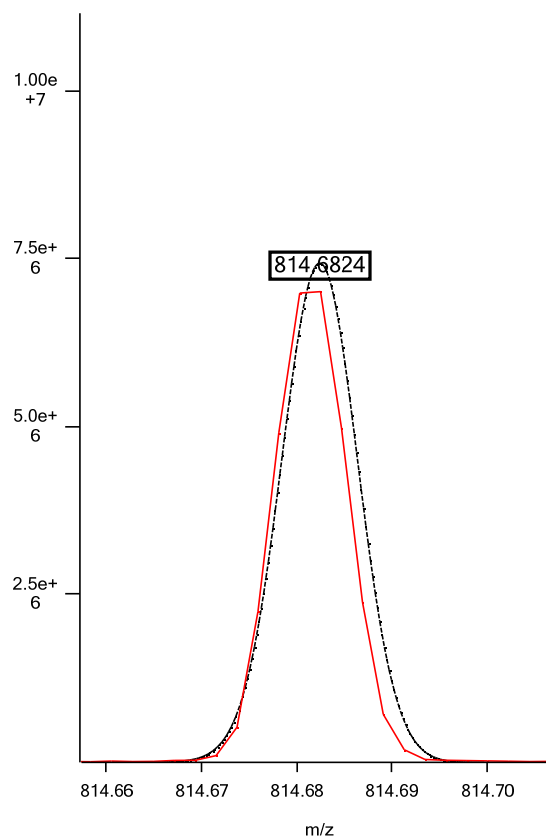

### Isotope 3

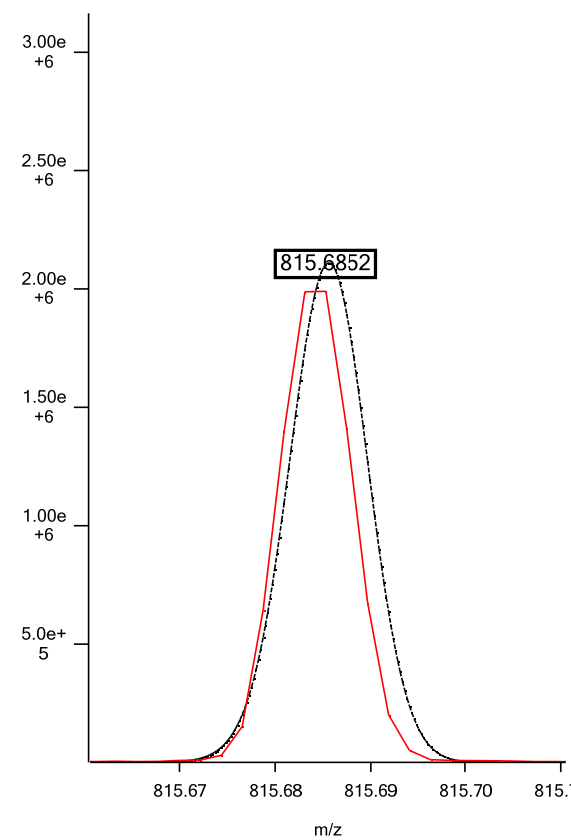

Positive ESI: SM d18:1/24:0; C<sub>47</sub>H<sub>96</sub>N<sub>2</sub>O<sub>6</sub>P; theoretical *m/z* 815.7006, (M+H)<sup>+</sup>; isotopic fit 0.0182

### Isotope 1

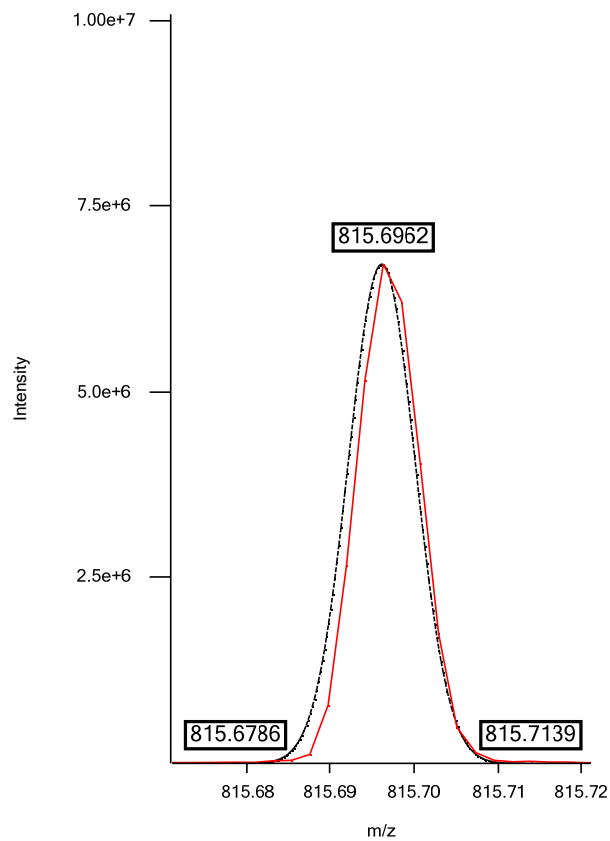

### Isotope 2

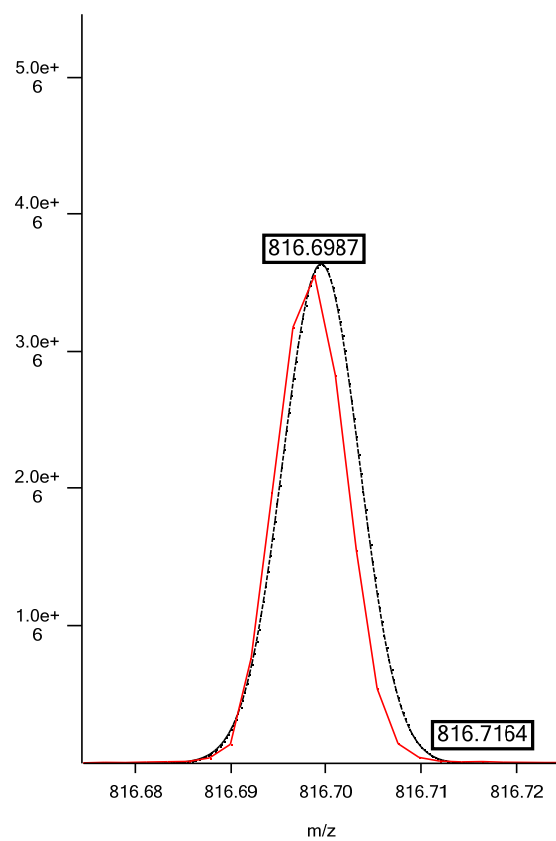

### Isotope 3

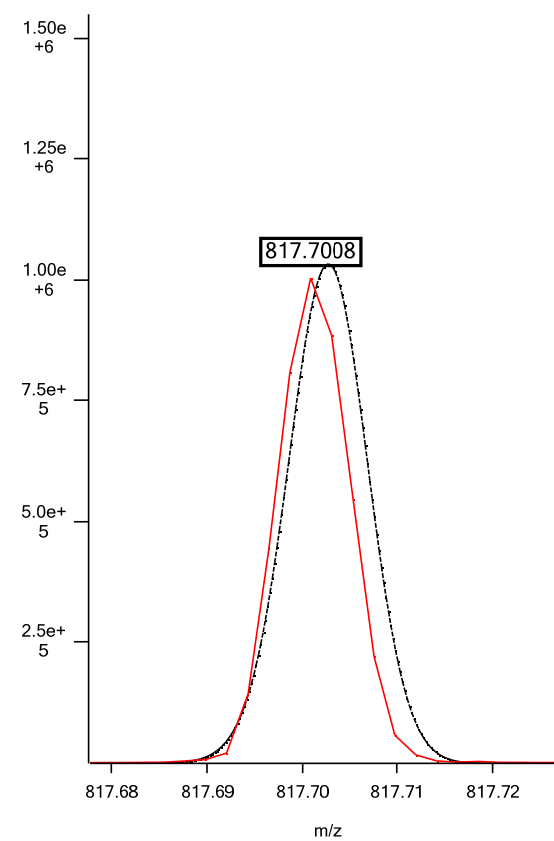



Positive ESI: SM d19:1/24:1; C<sub>48</sub>H<sub>96</sub>N<sub>2</sub>O<sub>6</sub>P; theoretical *m/z* 827.7006, (M+H)<sup>+</sup>; isotopic fit 0.0072

### Isotope 1

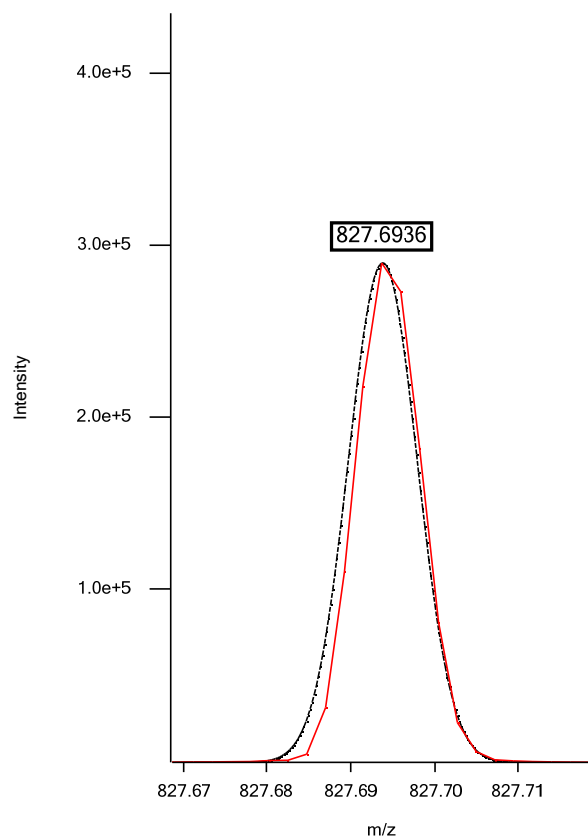

### Isotope 2

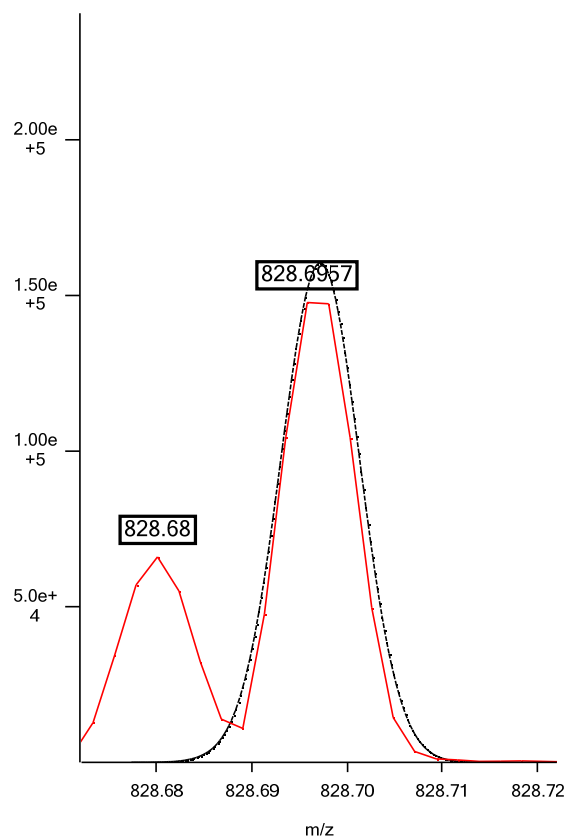

### Isotope 3

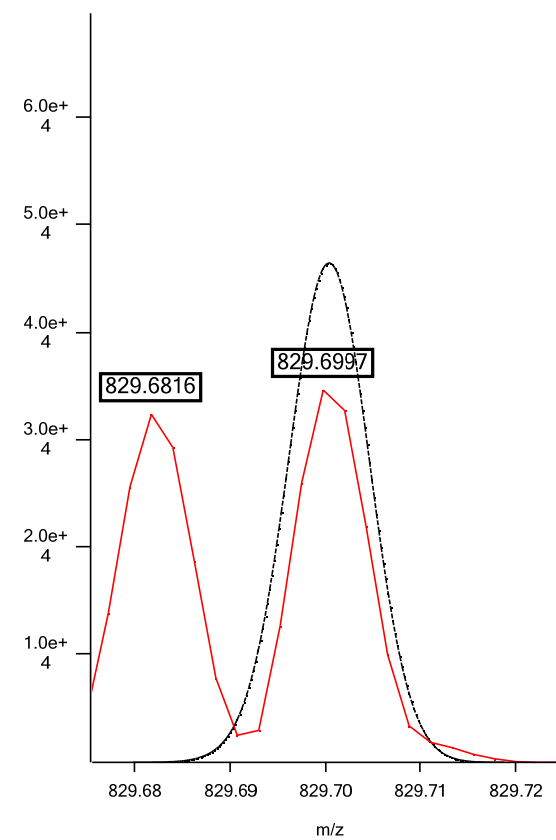

Positive ESI: SM d19:1/24:0; C<sub>48</sub>H<sub>98</sub>N<sub>2</sub>O<sub>6</sub>P; theoretical *m/z* 829.7163, (M+H)<sup>+</sup>; isotopic fit 0.0063

### Isotope 1

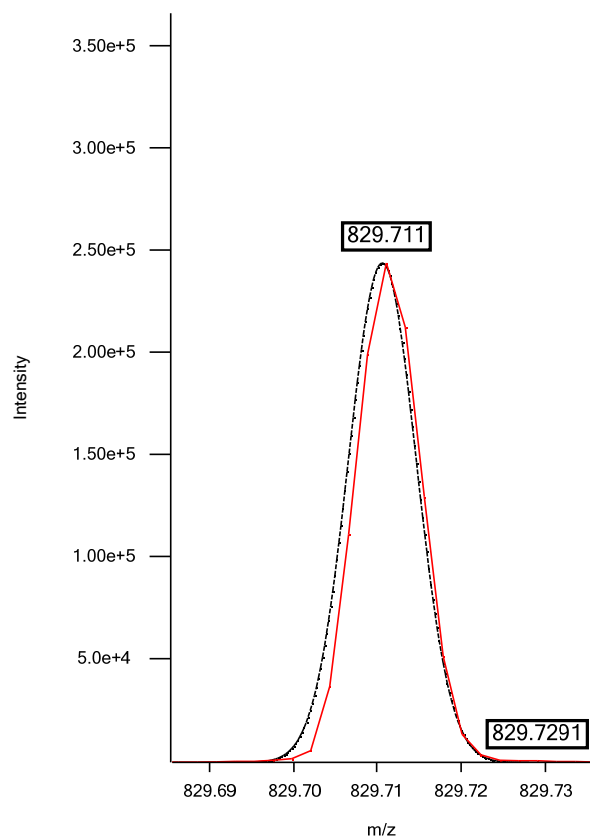

### Isotope 2

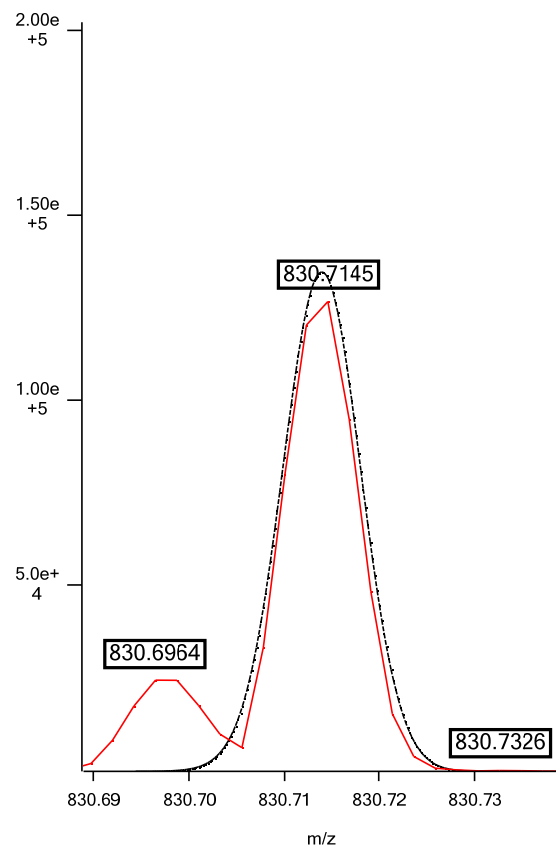

### Isotope 3

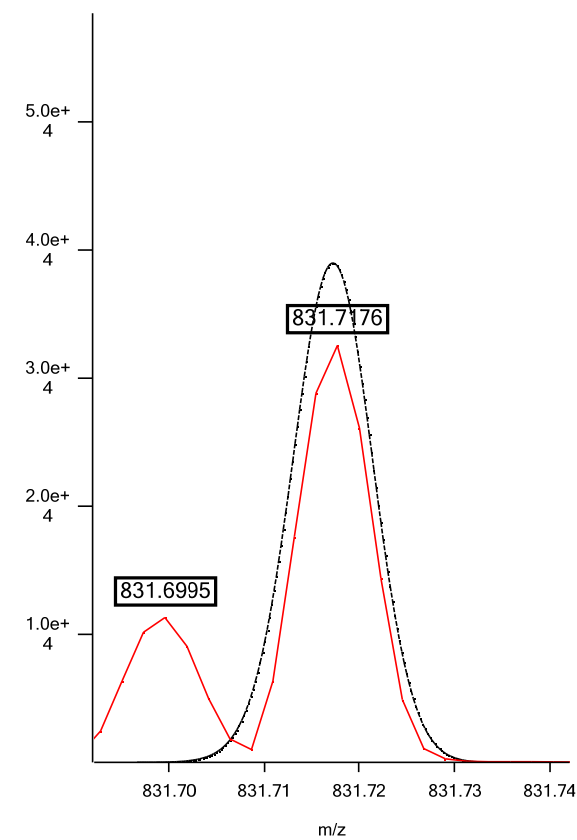

Positive ESI: SM d18:1/26:3; C<sub>49</sub>H<sub>94</sub>N<sub>2</sub>O<sub>6</sub>P; theoretical  $m/z$  837.6849, (M+H)<sup>+</sup>; isotopic fit 0.0168

### Isotope 1

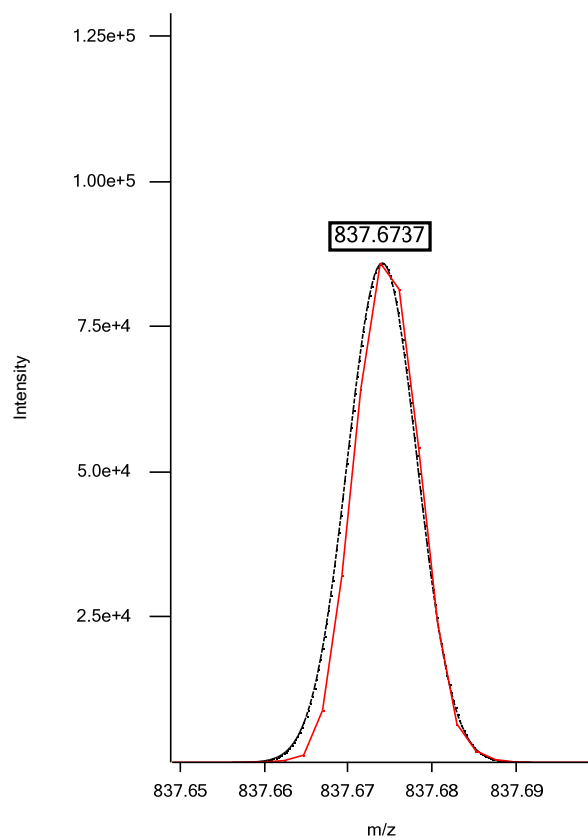

### Isotope 2

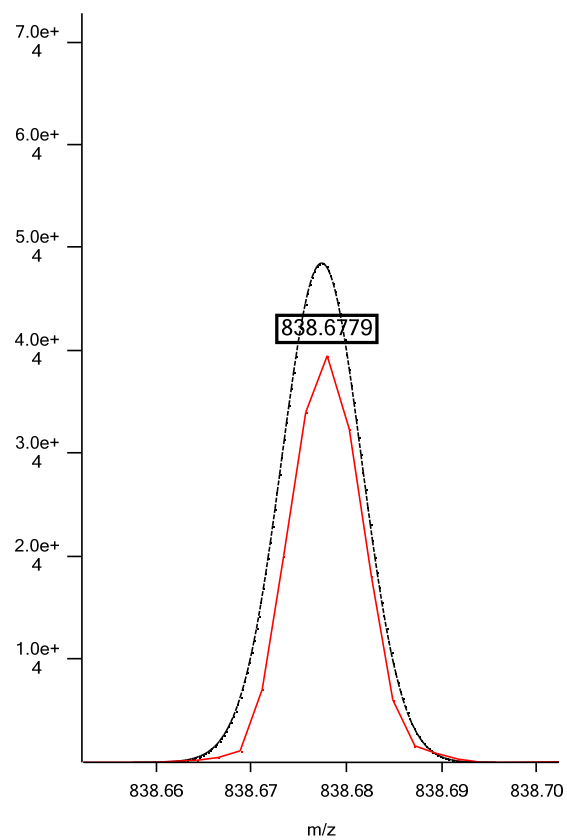

### Isotope 3

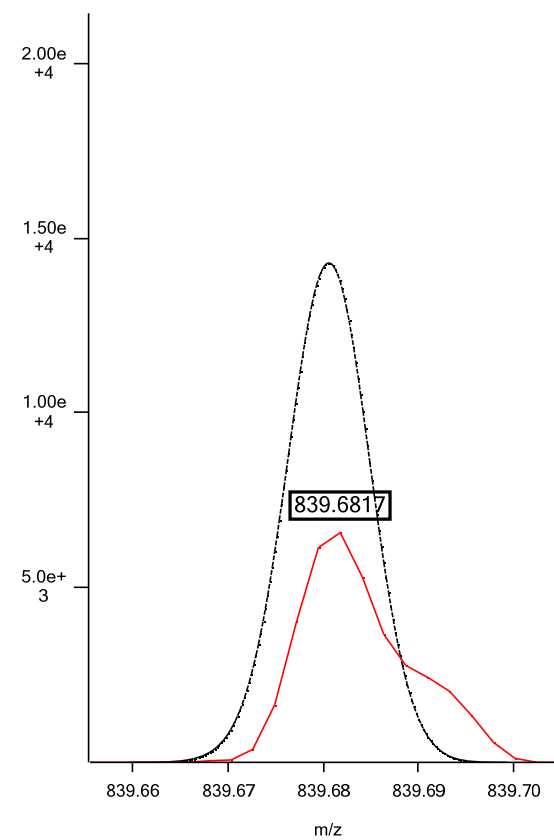

Positive ESI: SM d18:1/26:2; C<sub>49</sub>H<sub>96</sub>N<sub>2</sub>O<sub>6</sub>P; theoretical  $m/z$  839.7006, (M+H)<sup>+</sup>; isotopic fit 0.0076

### Isotope 1

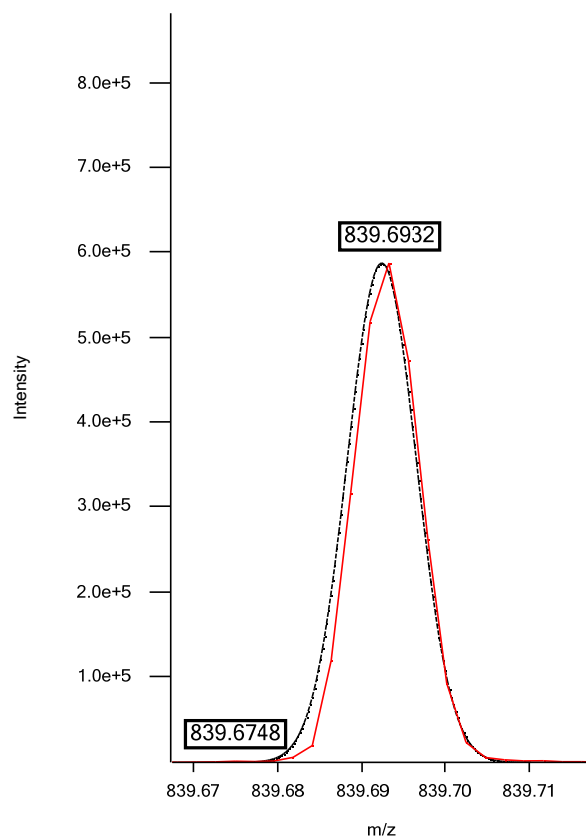

### Isotope 2

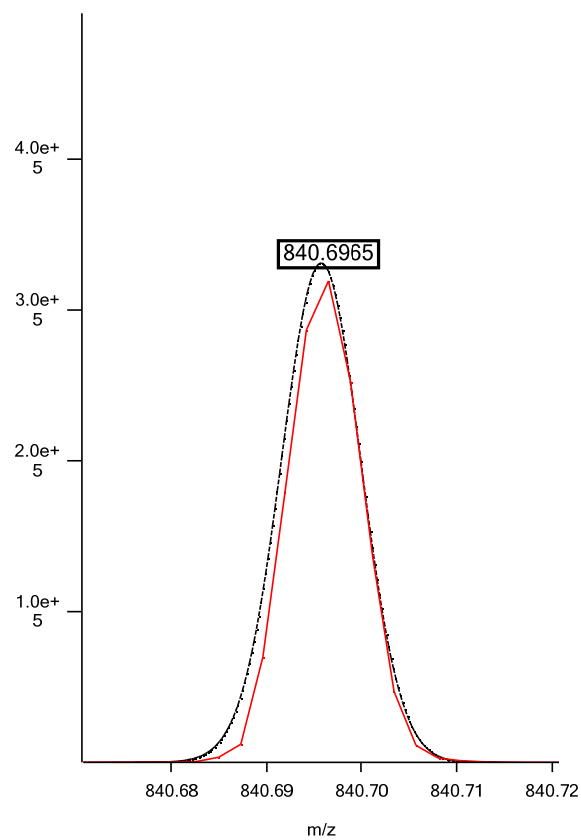

### Isotope 3

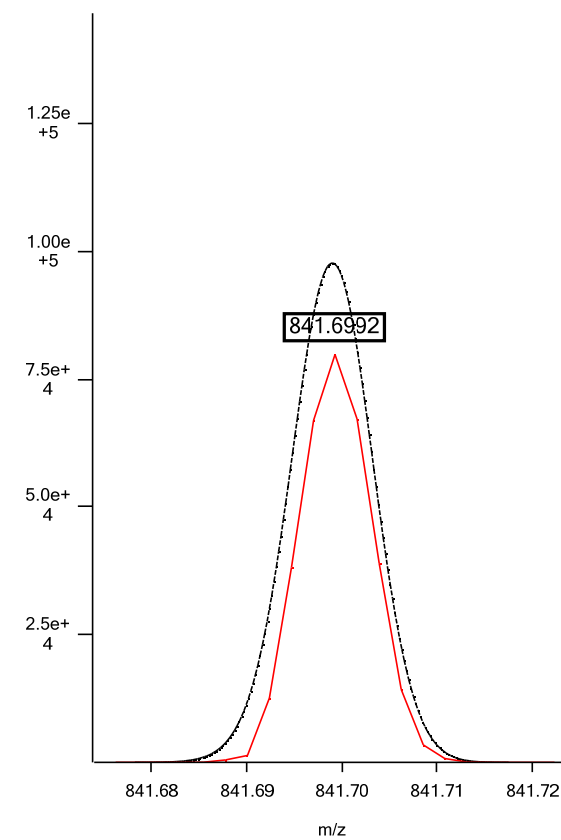

Positive ESI: SM d18:1/26:1; C<sub>49</sub>H<sub>98</sub>N<sub>2</sub>O<sub>6</sub>P; theoretical  $m/z$  841.7163, (M+H)<sup>+</sup>; isotopic fit 0.0043

### Isotope 1

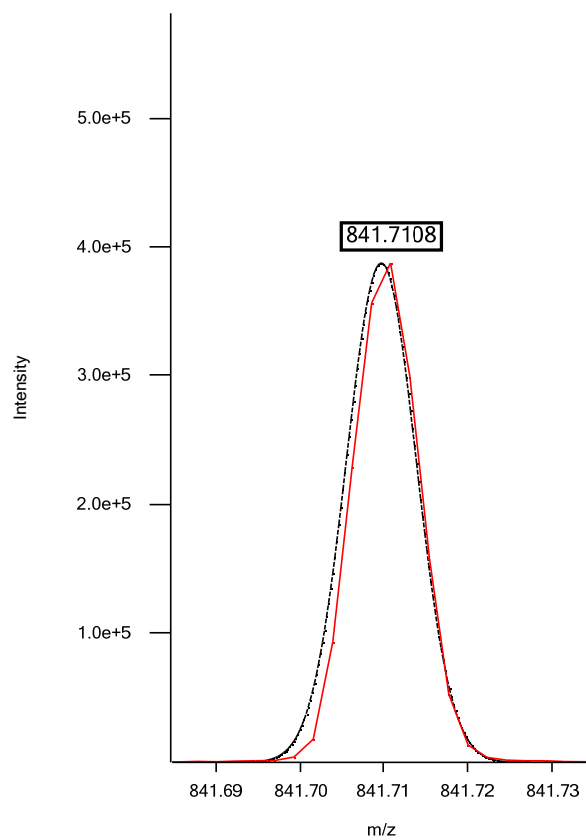

### Isotope 2

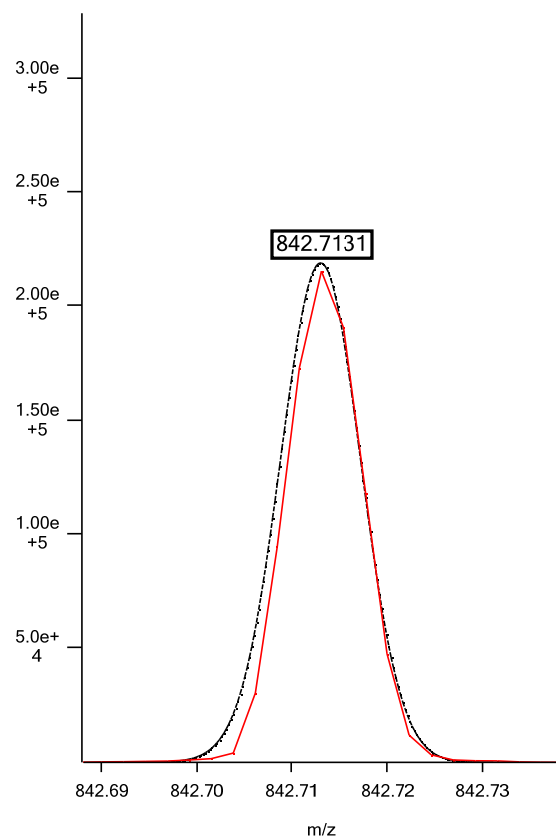

### Isotope 3

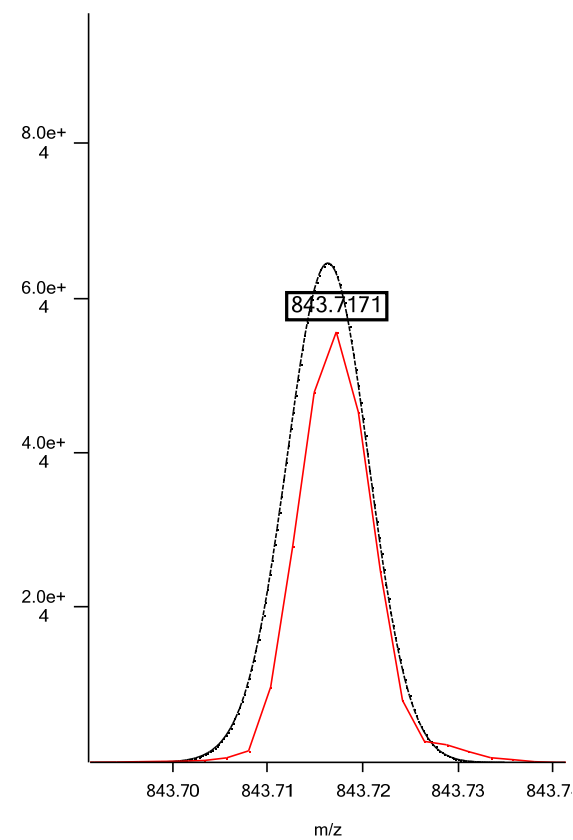

Positive ESI: SM d18:1/26:0; C<sub>49</sub>H<sub>100</sub>N<sub>2</sub>O<sub>6</sub>P; theoretical  $m/z$  843.7319, (M+H)<sup>+</sup>; isotopic fit 0.0039

### Isotope 1

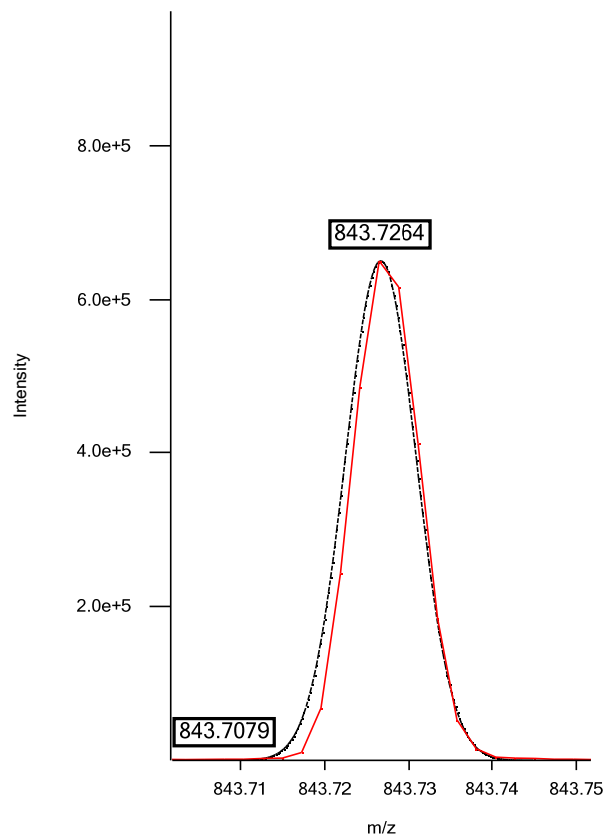

### Isotope 2

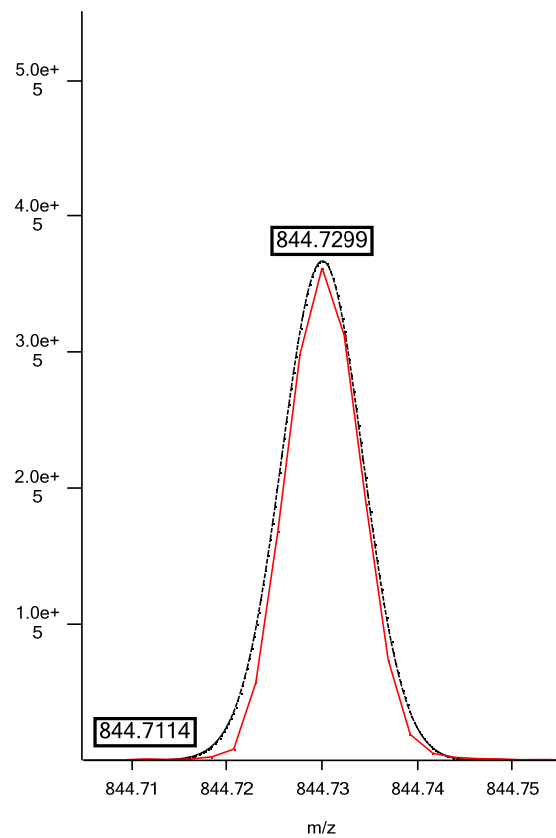

### Isotope 3

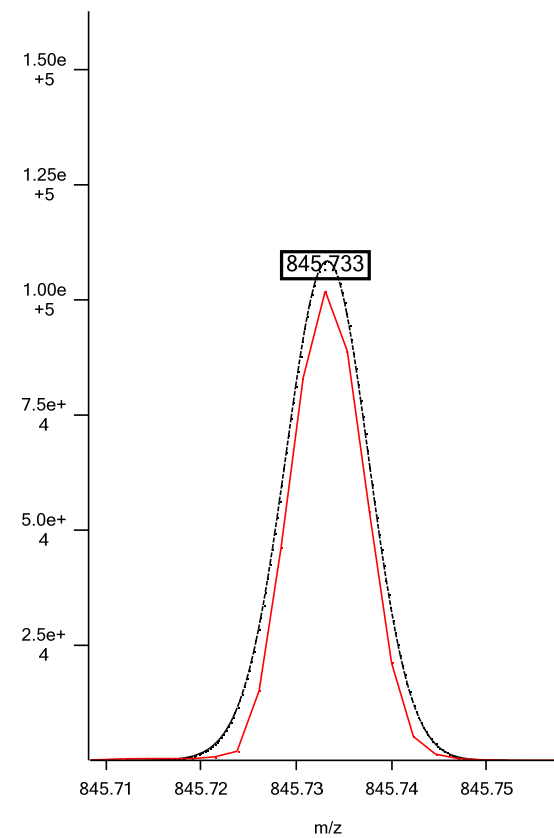

# Cholesterol esters

Positive ESI: Cholesterol; C<sub>27</sub>H<sub>50</sub>NO; theoretical *m/z* 404.3892, (M+NH<sub>4</sub>)<sup>+</sup>; isotopic fit 0.0406

### Isotope 1

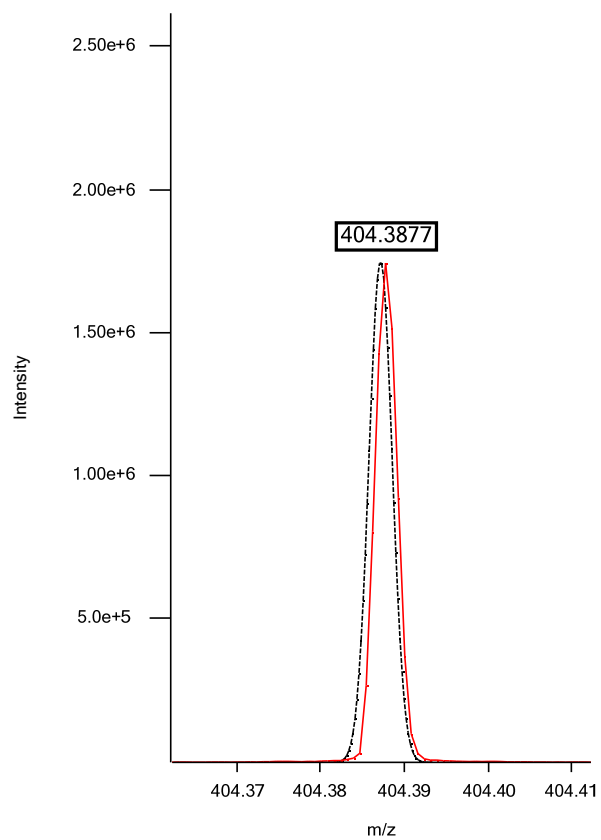

### Isotope 2

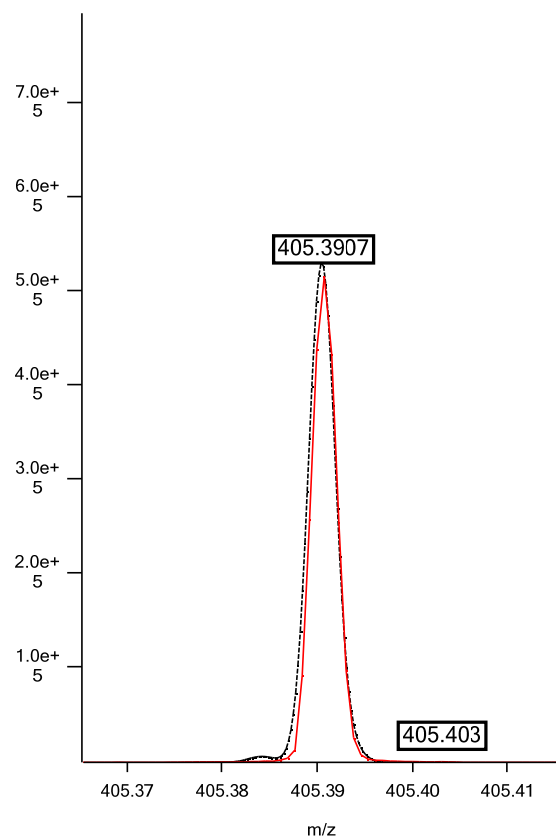

### Isotope 3

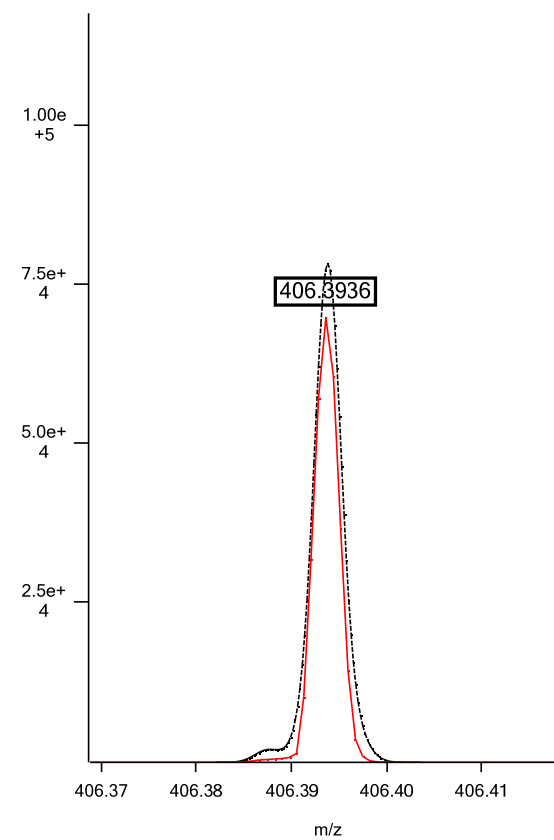



Positive ESI: CE 16:0; C<sub>43</sub>H<sub>80</sub>NO<sub>2</sub>; theoretical  $m/z$  642.6189, (M+NH<sub>4</sub>)<sup>+</sup>; isotopic fit 0.0046

### Isotope 1

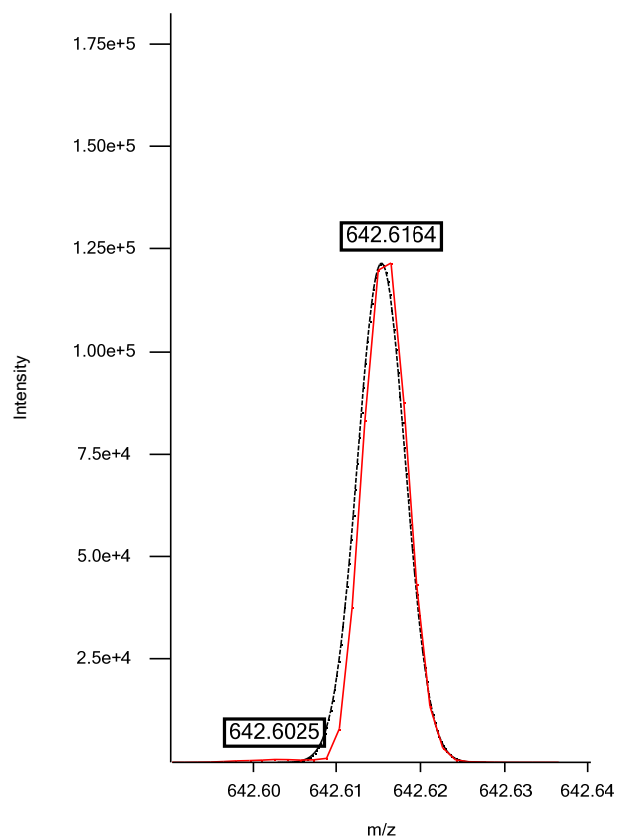

### Isotope 2

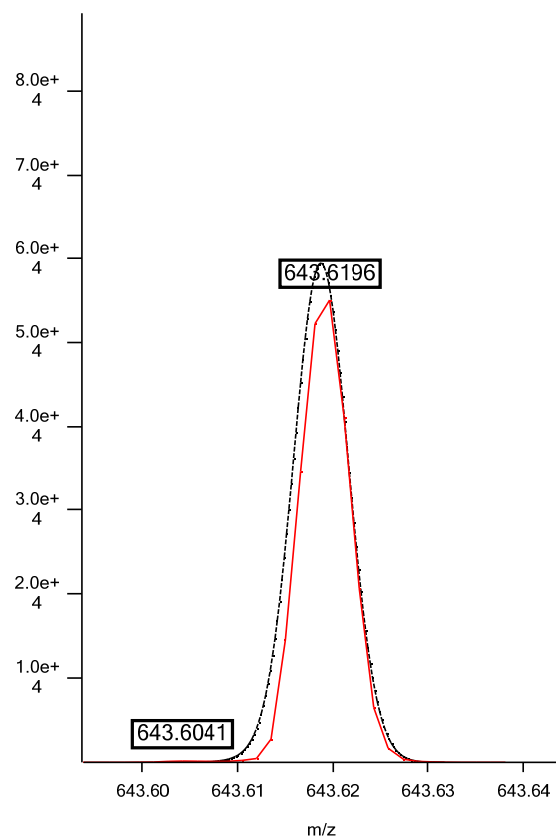

### Isotope 3

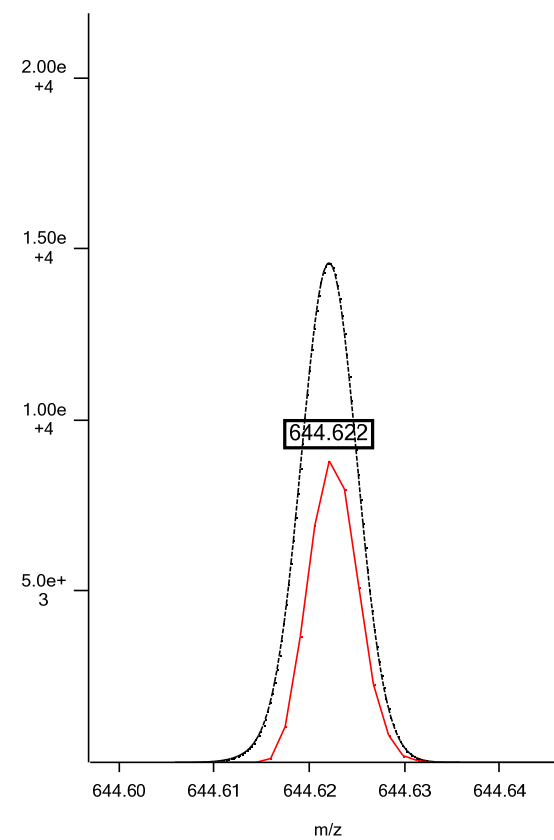

Positive ESI: CE 18:3; C<sub>45</sub>H<sub>78</sub>NO<sub>2</sub>; theoretical  $m/z$  664.6032, (M+NH<sub>4</sub>)<sup>+</sup>; isotopic fit 0.0058

### Isotope 1

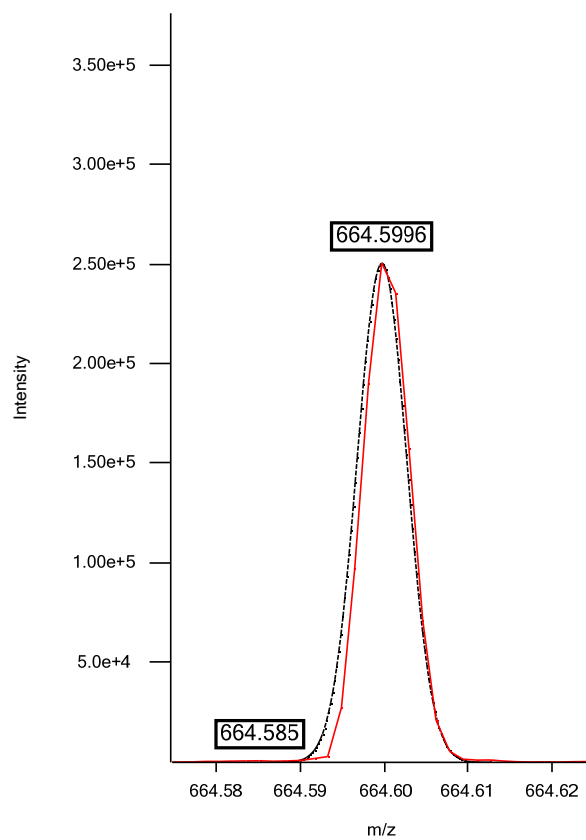

### Isotope 2

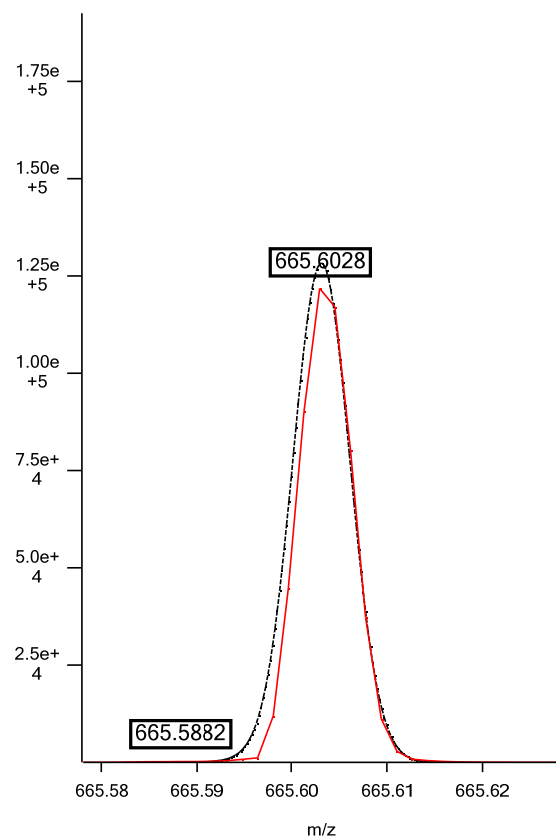

### Isotope 3

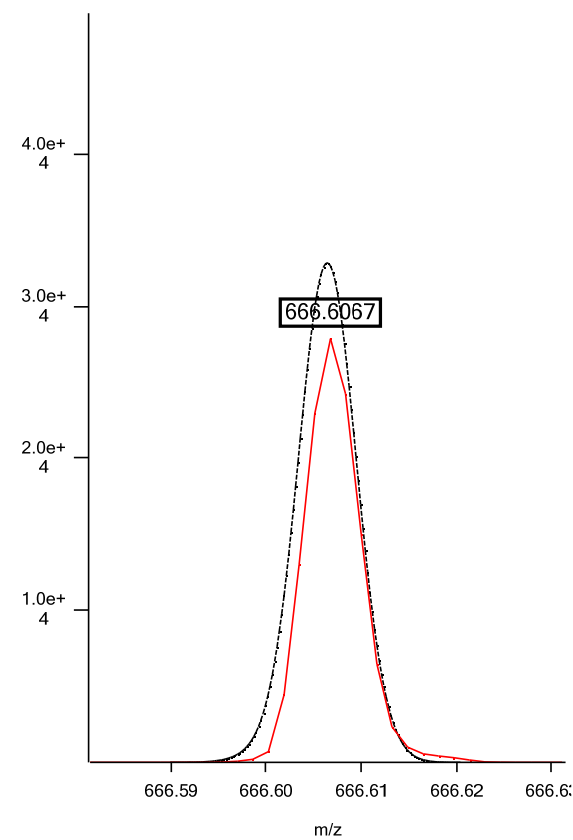

Positive ESI: CE 18:2; C<sub>45</sub>H<sub>80</sub>NO<sub>2</sub>; theoretical *m/z* 666.6189, (M+NH<sub>4</sub>)<sup>+</sup>; isotopic fit 0.0139

### Isotope 1

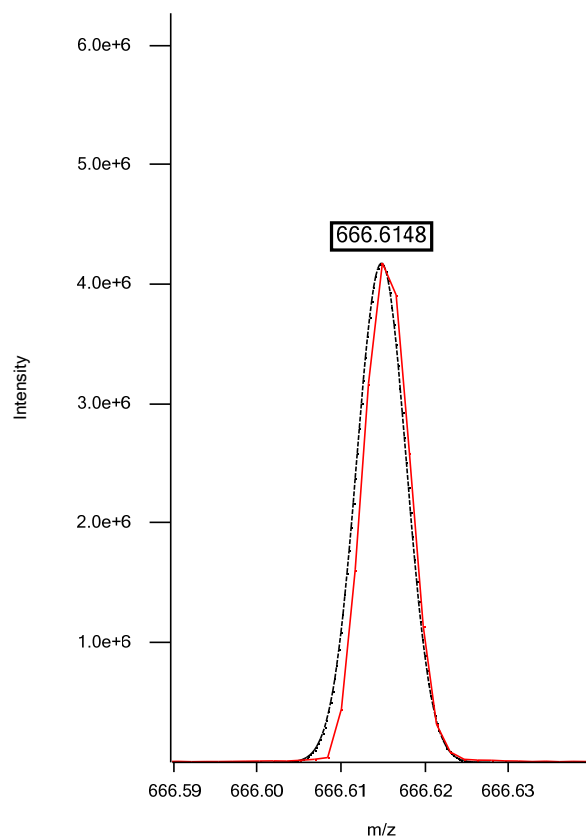

### Isotope 2

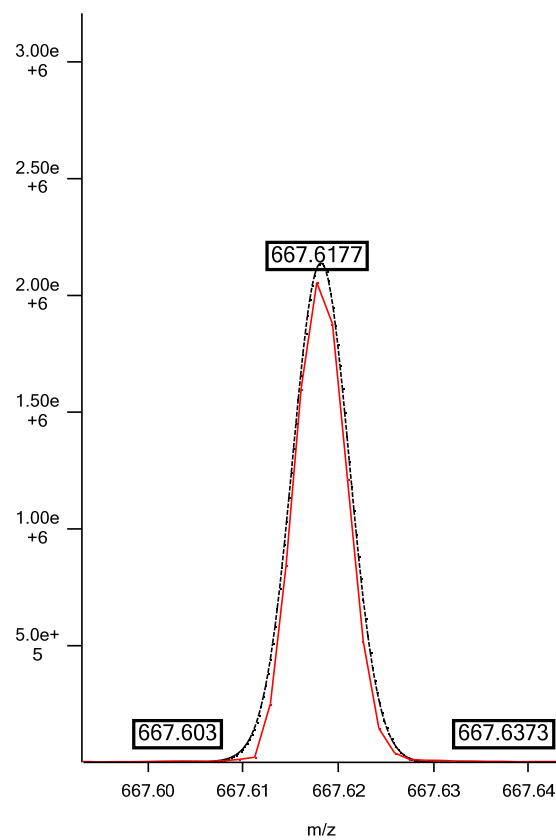

### Isotope 3

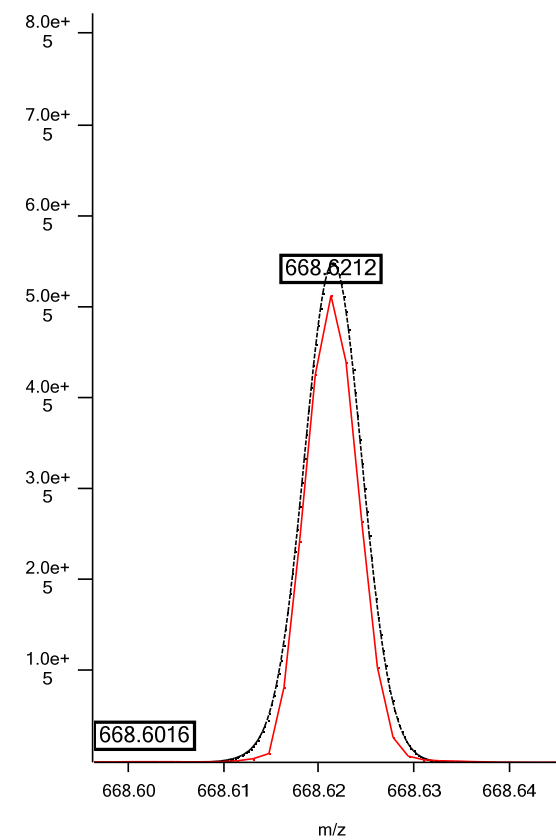

Positive ESI: CE 18:1; C<sub>45</sub>H<sub>82</sub>NO<sub>2</sub>; theoretical *m/z* 668.6345, (M+NH<sub>4</sub>)<sup>+</sup>; isotopic fit 0.0066

### Isotope 1

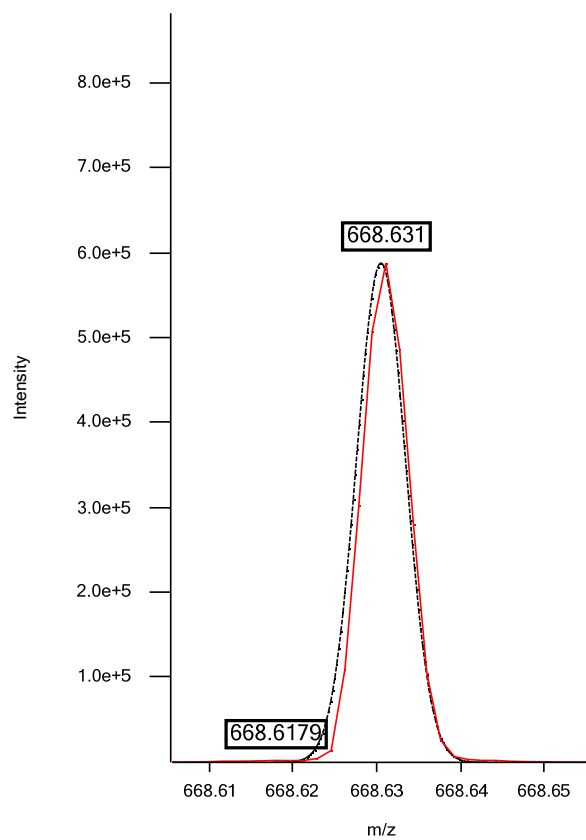

### Isotope 2

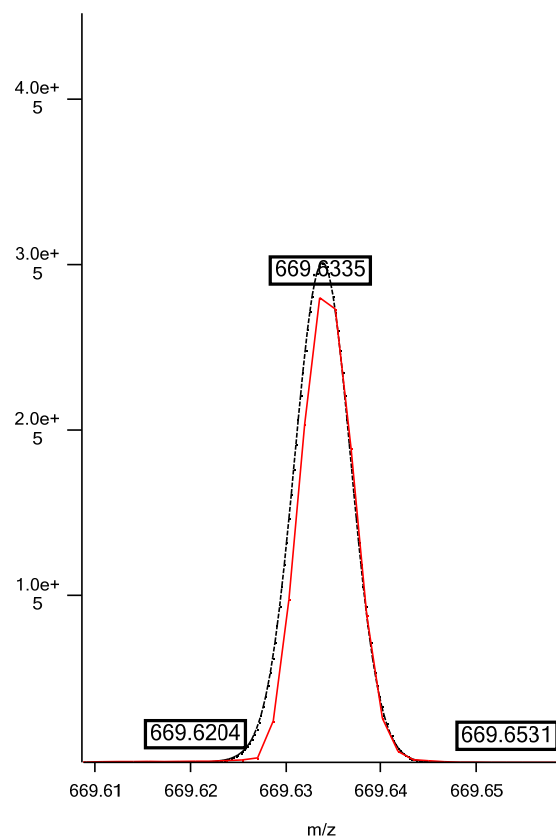

### Isotope 3

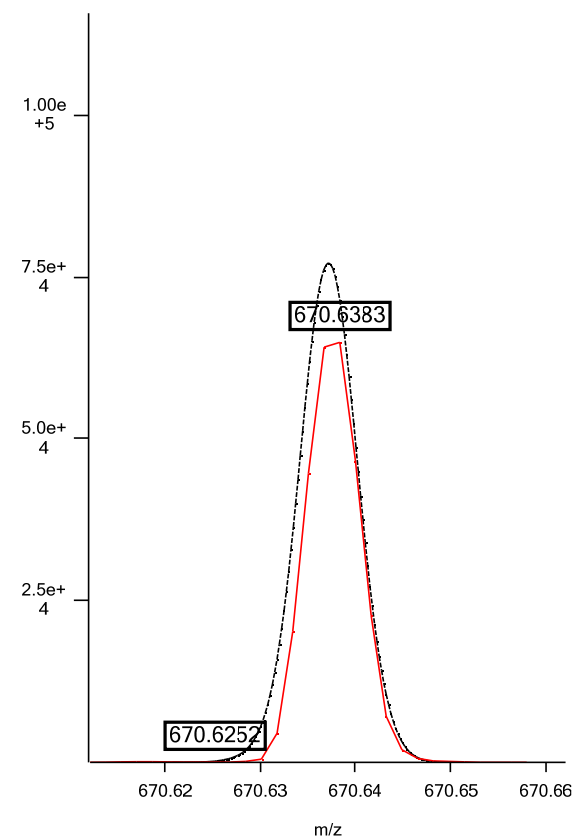

Positive ESI: CE 19:3; C<sub>46</sub>H<sub>80</sub>NO<sub>2</sub>; theoretical *m/z* 678.6189, (M+NH<sub>4</sub>)<sup>+</sup>; isotopic fit 0.0062

### Isotope 1

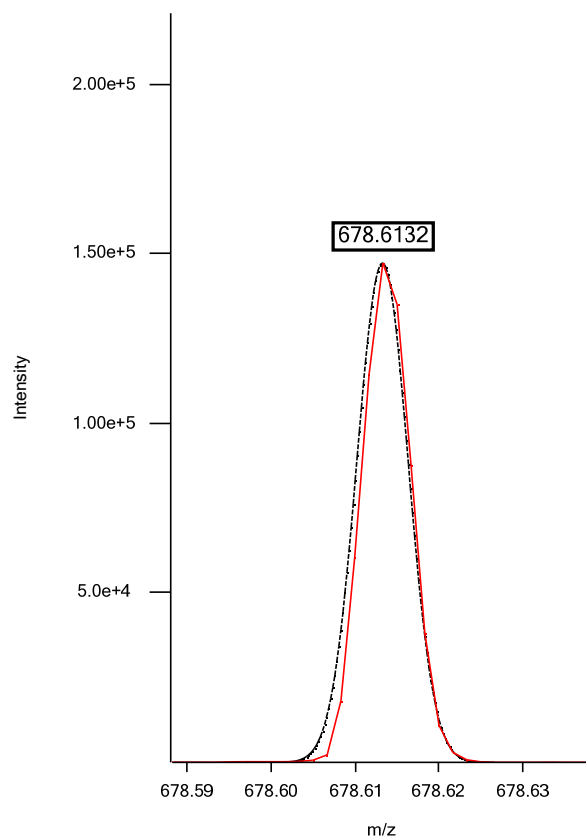

### Isotope 2

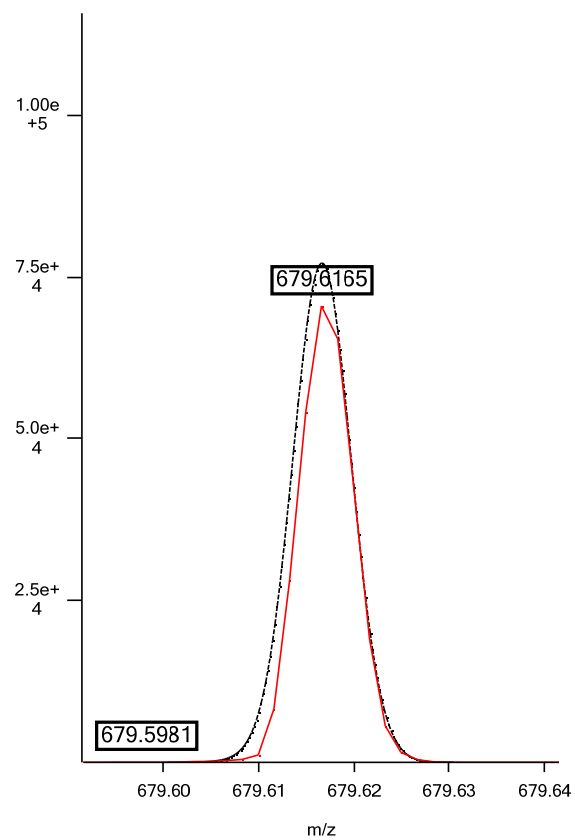

### Isotope 3

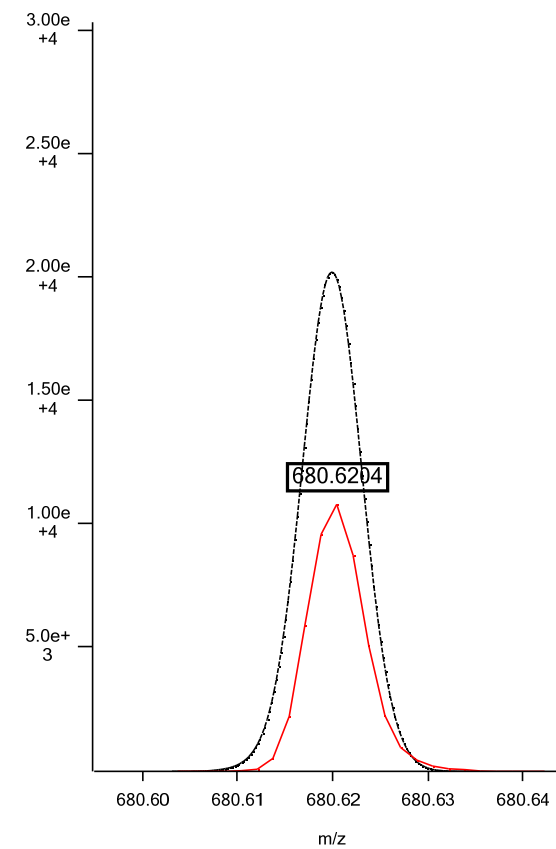

Positive ESI: CE 19:2; C<sub>46</sub>H<sub>82</sub>NO<sub>2</sub>; theoretical *m/z* 680.6345, (M+NH<sub>4</sub>)<sup>+</sup>; isotopic fit 0.0180

### Isotope 1

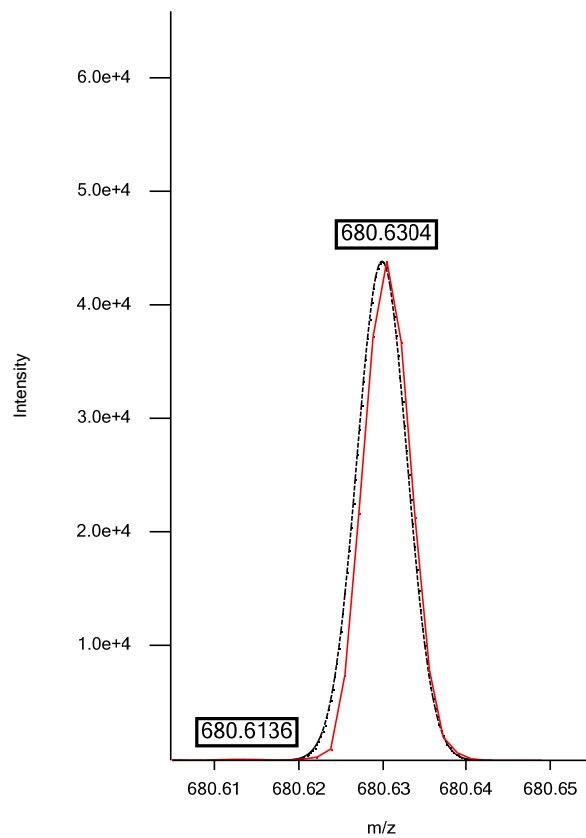

### Isotope 2

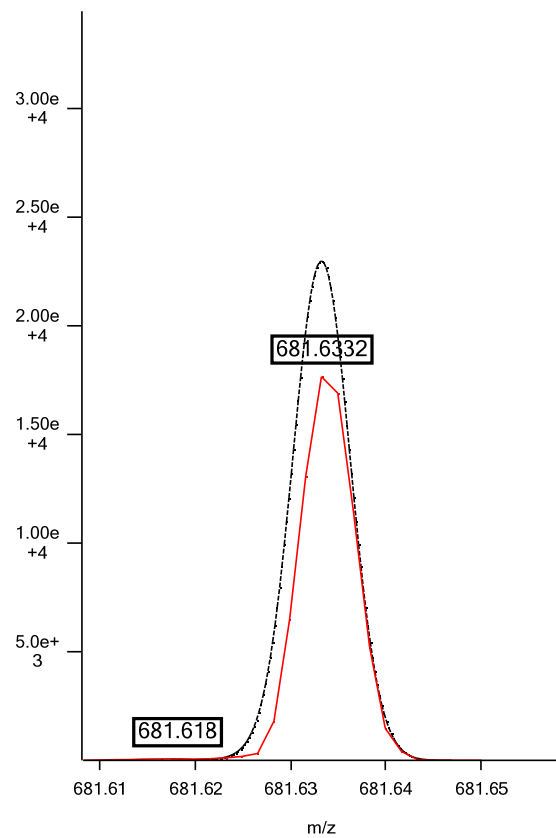

### Isotope 3

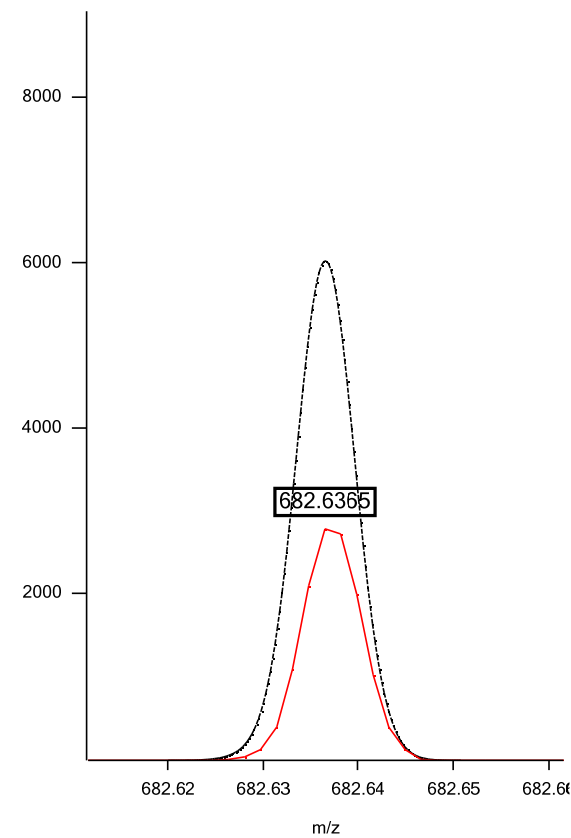

Positive ESI: CE 20:5; C<sub>47</sub>H<sub>78</sub>NO<sub>2</sub>; theoretical *m/z* 688.6032, (M+NH<sub>4</sub>)<sup>+</sup>; isotopic fit 0.0044

### Isotope 1

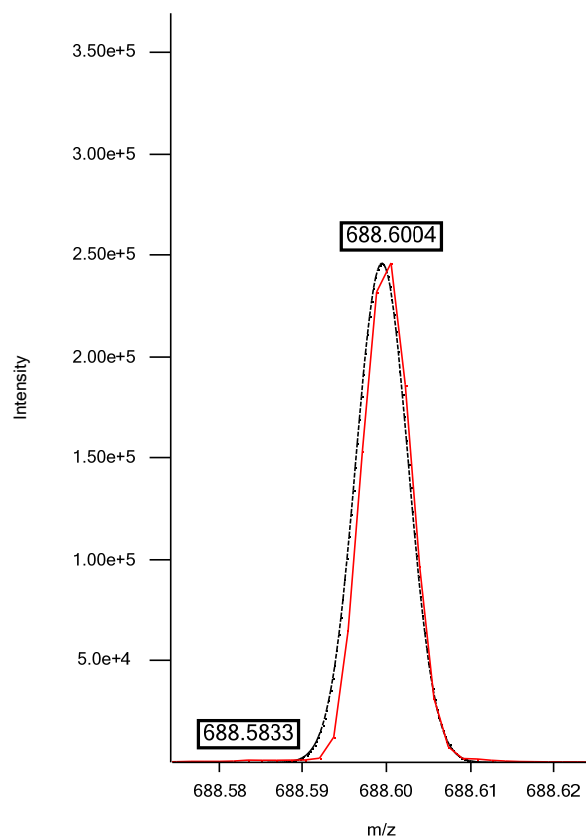

### Isotope 2

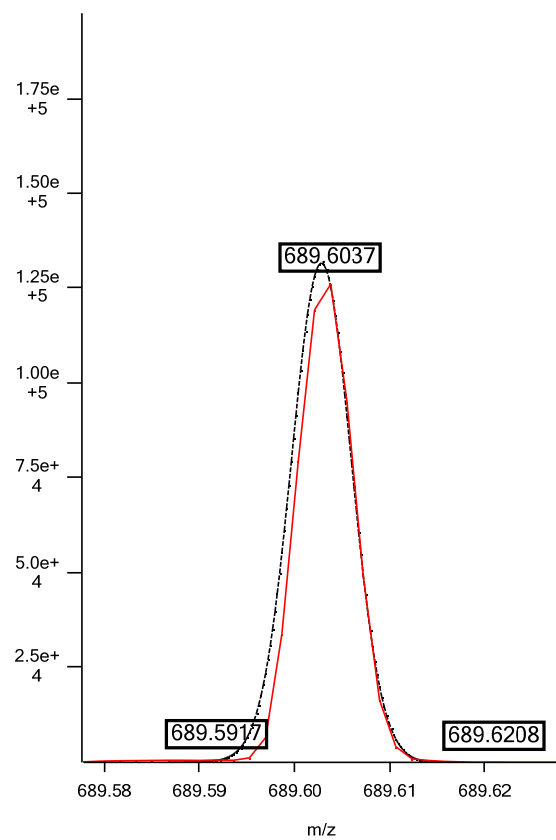

### Isotope 3

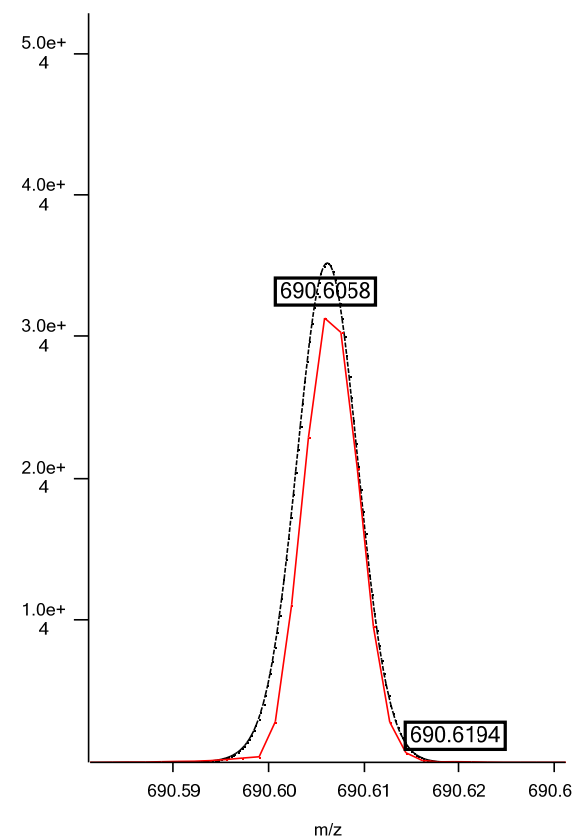

Positive ESI: CE 20:4; C<sub>47</sub>H<sub>80</sub>NO<sub>2</sub>; theoretical *m/z* 690.6189, (M+NH<sub>4</sub>)<sup>+</sup>; isotopic fit 0.0056

### Isotope 1

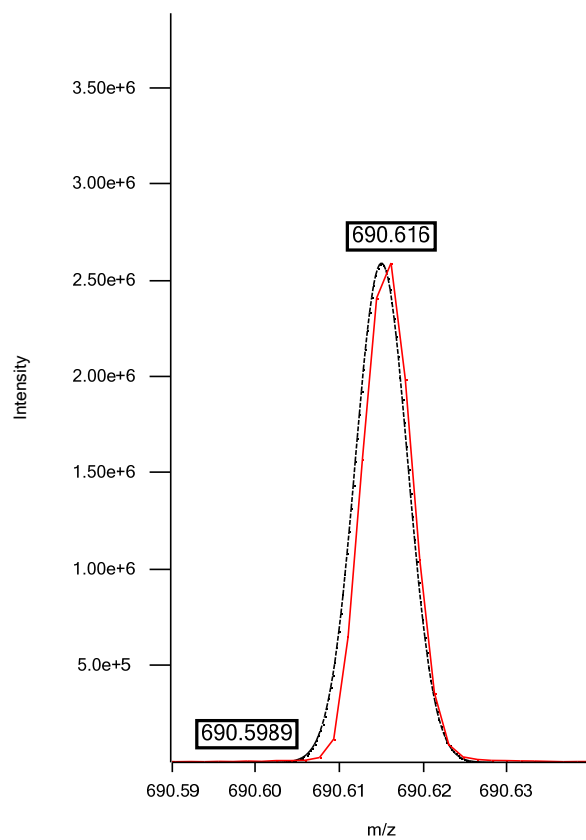

### Isotope 2

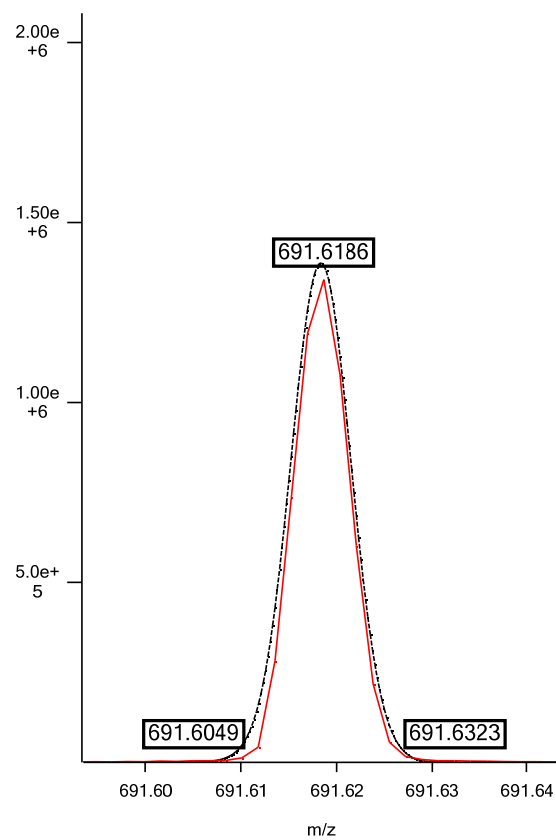

### Isotope 3

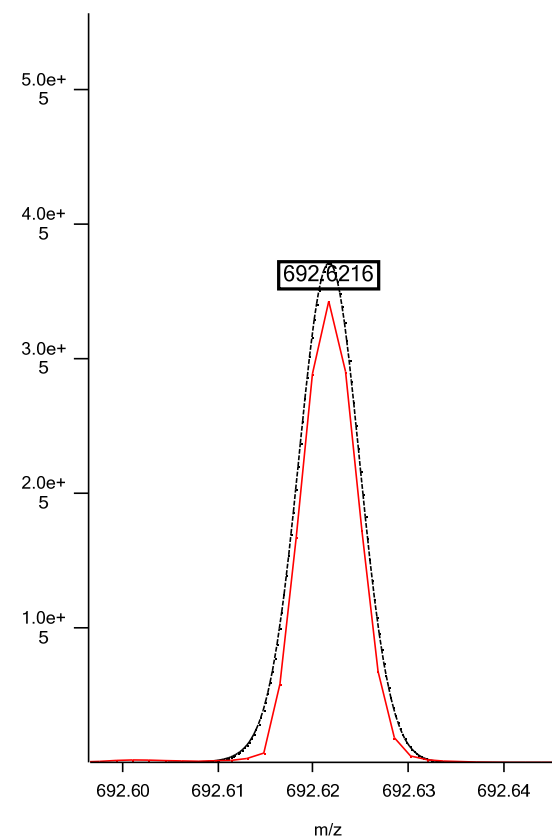



Positive ESI: CE 20:3; C<sub>47</sub>H<sub>82</sub>NO<sub>2</sub>; theoretical *m/z* 692.6345, (M+NH<sub>4</sub>)<sup>+</sup>; isotopic fit 0.0049

### Isotope 1

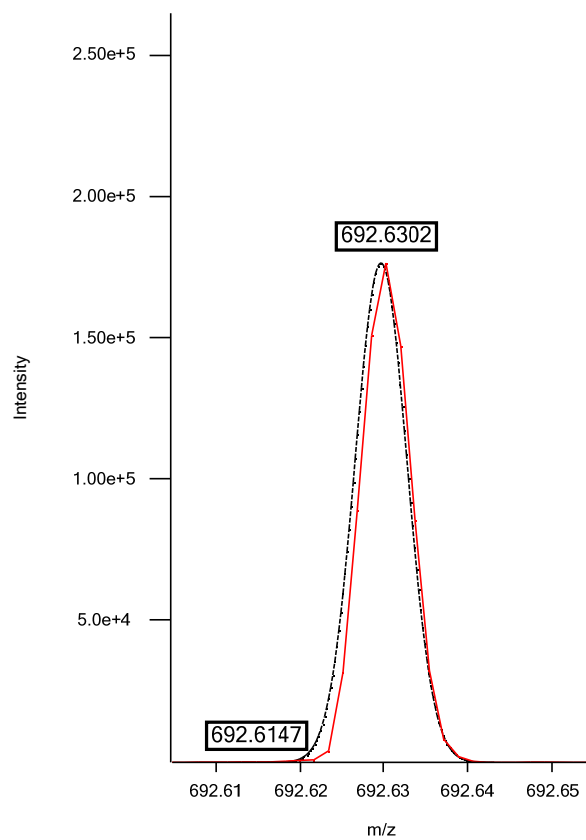

### Isotope 2

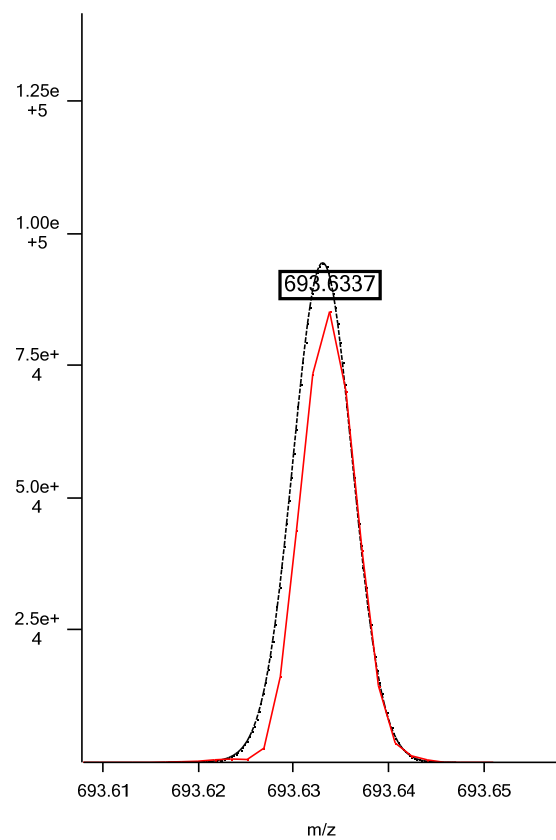

### Isotope 3

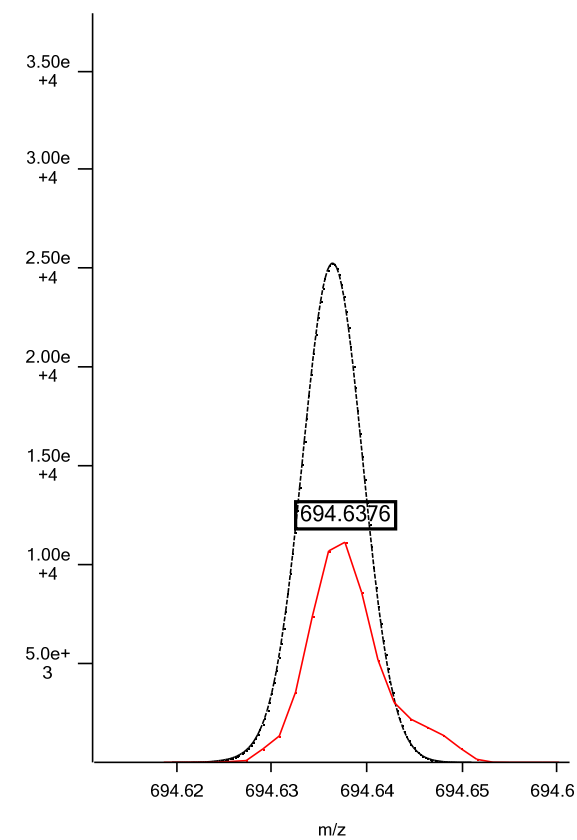

Positive ESI: CE 20:2; C<sub>47</sub>H<sub>84</sub>NO<sub>2</sub>; theoretical  $m/z$  694.6502, (M+NH<sub>4</sub>)<sup>+</sup>; isotopic fit 0.0203

### Isotope 1

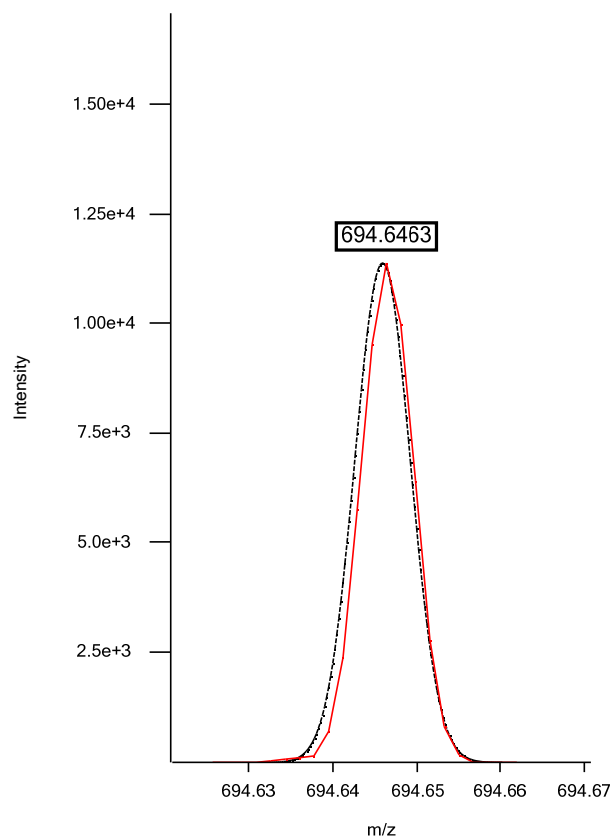

### Isotope 2

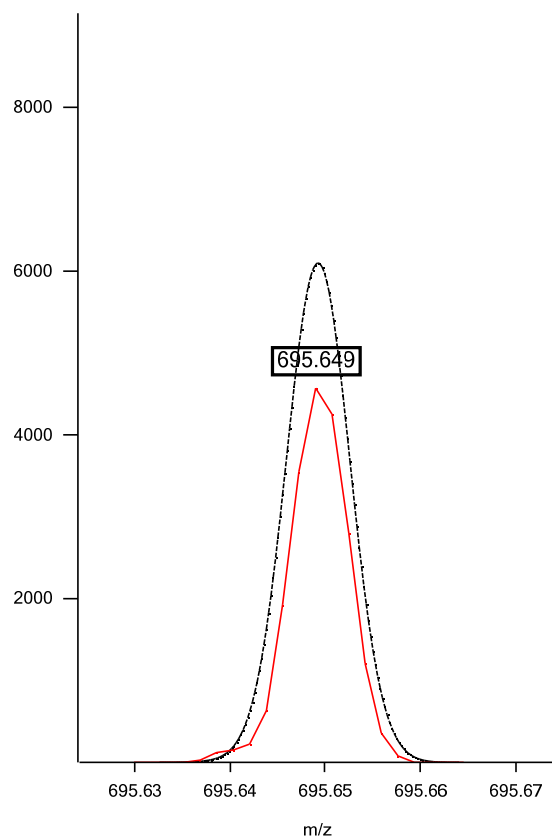

### Isotope 3

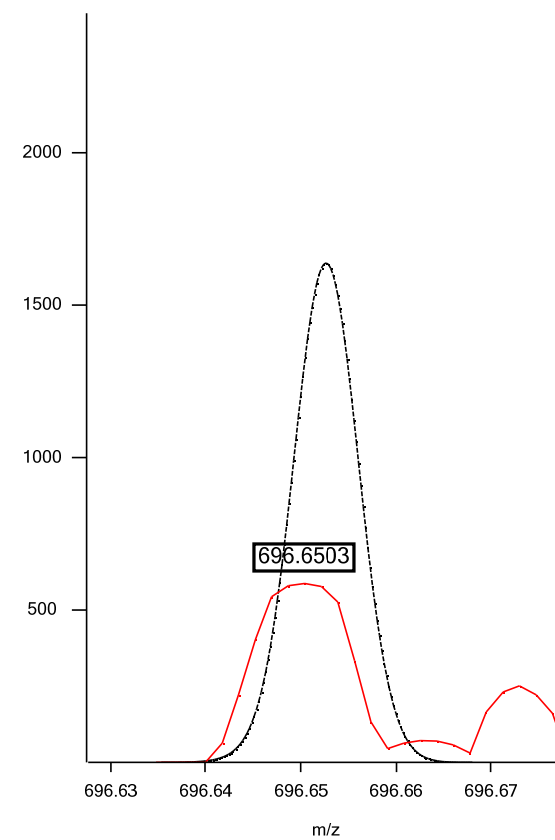

Positive ESI: CE 21:5; C<sub>48</sub>H<sub>80</sub>NO<sub>2</sub>; theoretical  $m/z$  702.6189, (M+NH<sub>4</sub>)<sup>+</sup>; isotopic fit 0.0091

### Isotope 1

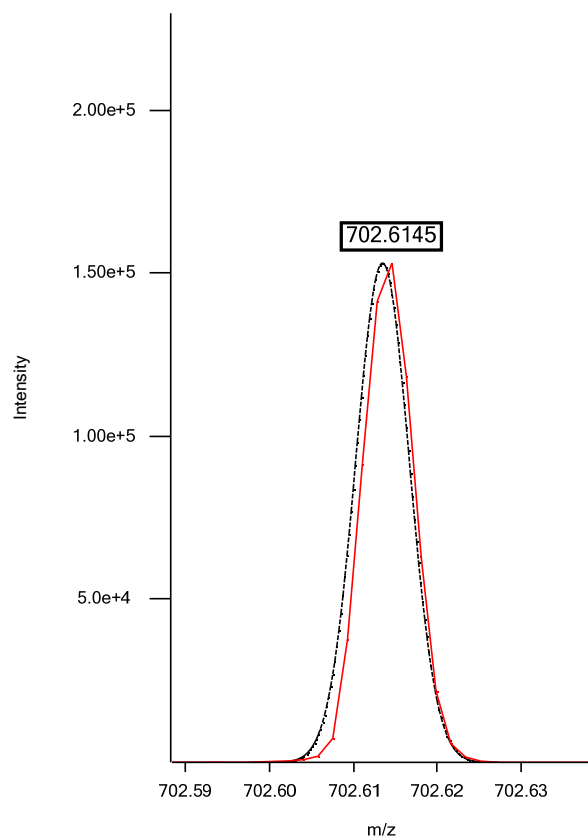

### Isotope 2

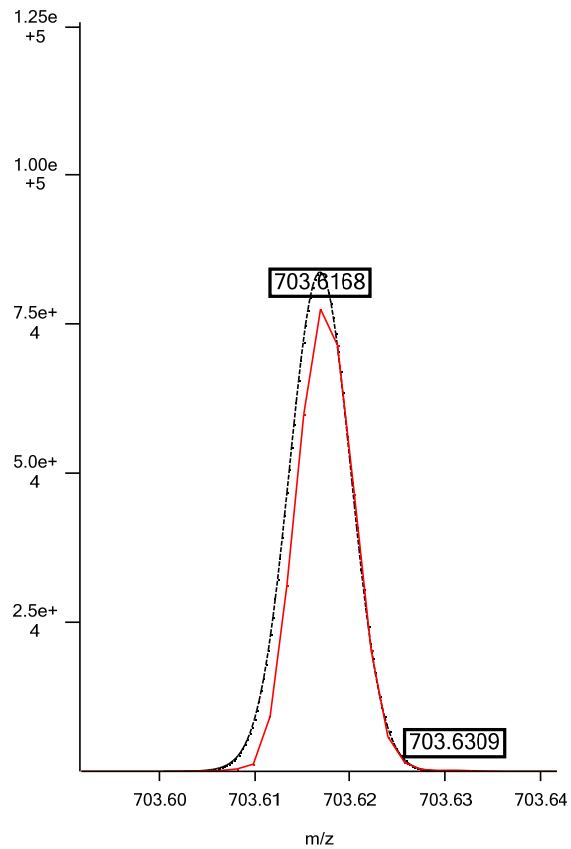

### Isotope 3

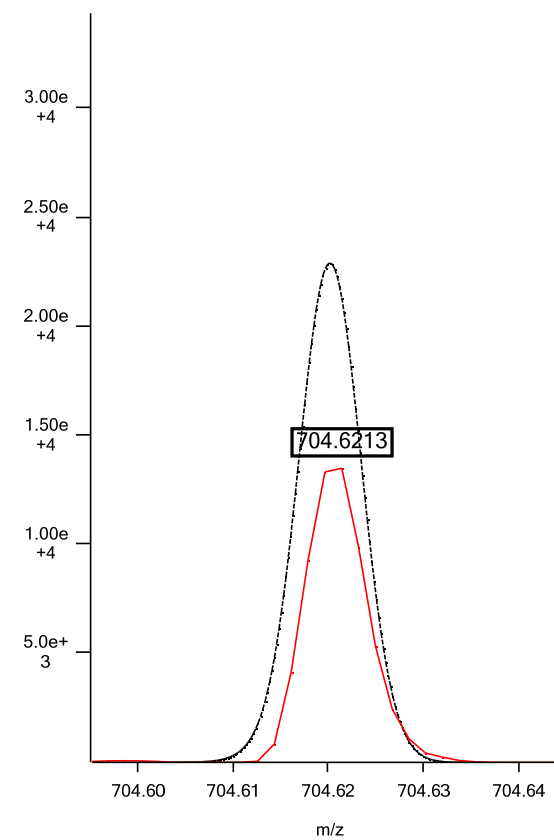

Positive ESI: CE 22:6; C<sub>49</sub>H<sub>80</sub>NO<sub>2</sub>; theoretical  $m/z$  714.6189, (M+NH<sub>4</sub>)<sup>+</sup>; isotopic fit 0.0033

### Isotope 1

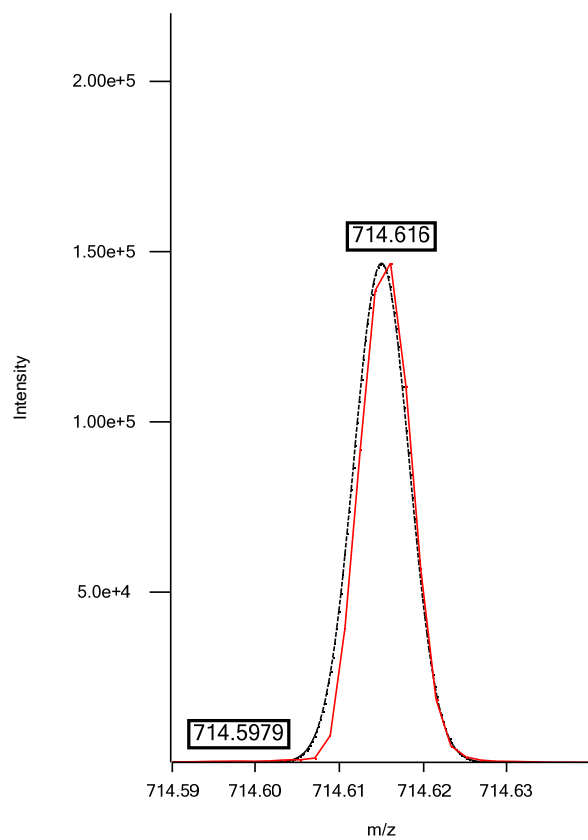

### Isotope 2

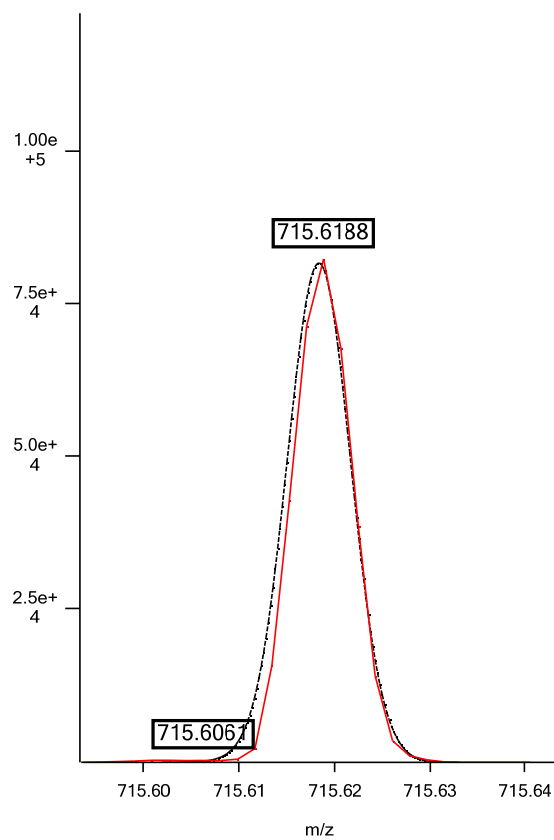

### Isotope 3

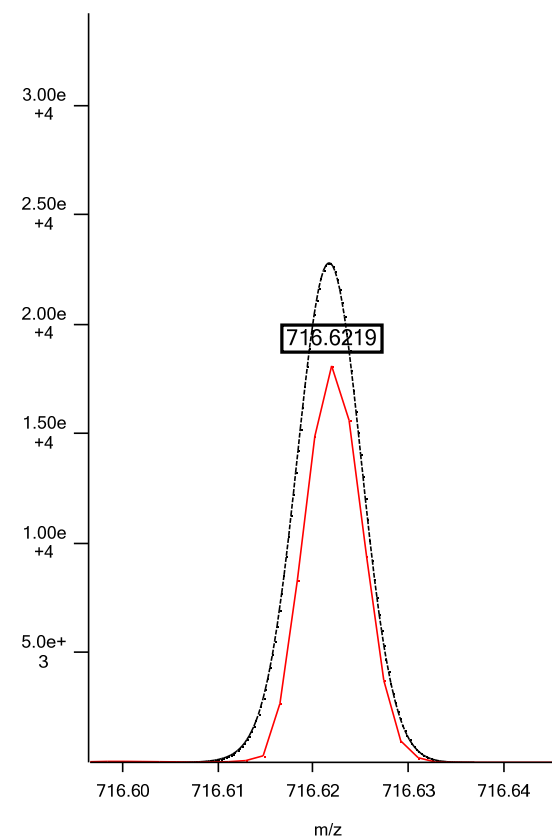

Positive ESI: CE 22:5; C<sub>49</sub>H<sub>82</sub>NO<sub>2</sub>; theoretical  $m/z$  716.6345, (M+NH<sub>4</sub>)<sup>+</sup>; isotopic fit 0.0312

### Isotope 1

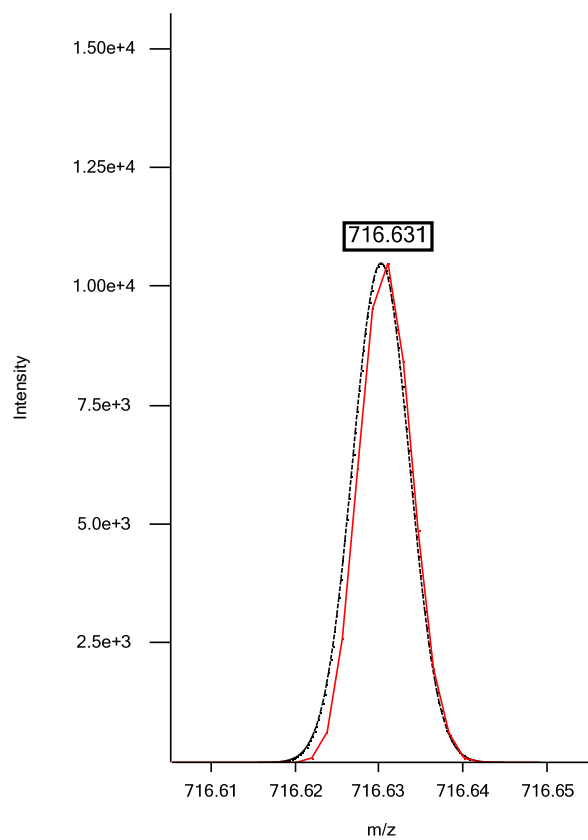

### Isotope 2

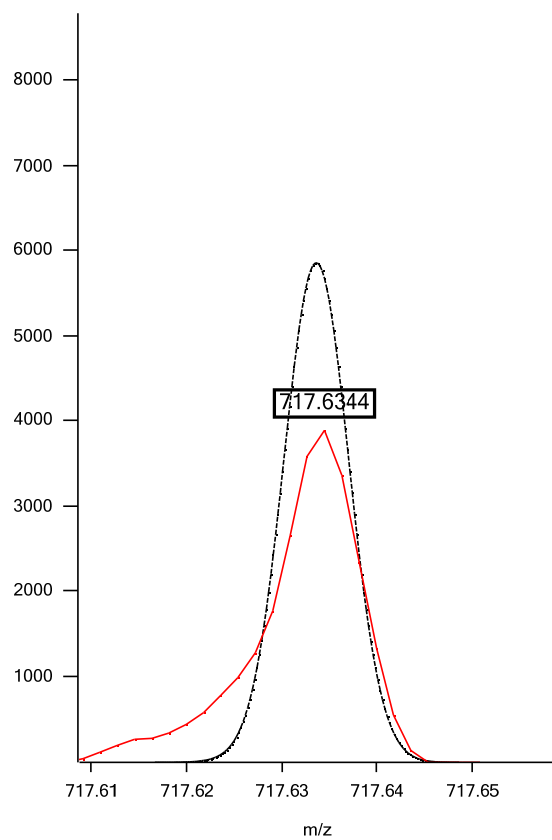

### Isotope 3

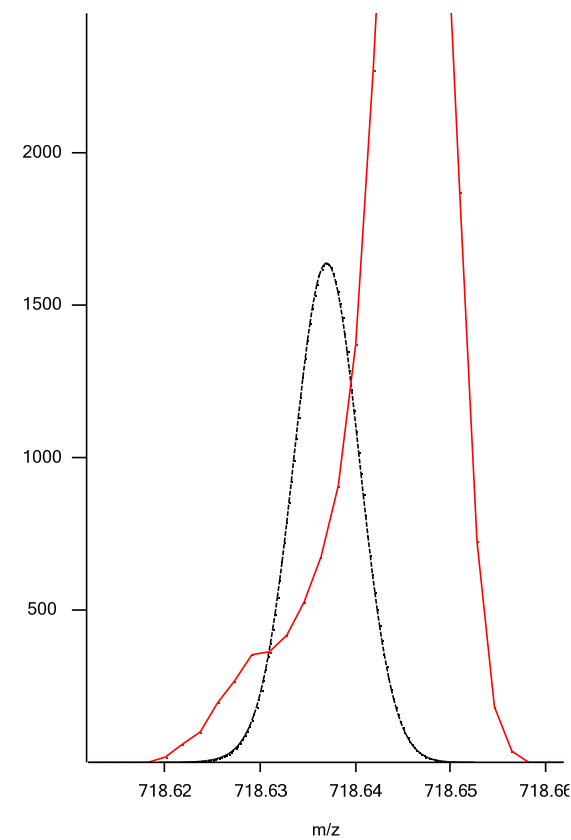

Positive ESI: CE 22:4; C<sub>49</sub>H<sub>84</sub>NO<sub>2</sub>; theoretical  $m/z$  718.6502, (M+NH<sub>4</sub>)<sup>+</sup>; isotopic fit 0.0288

### Isotope 1

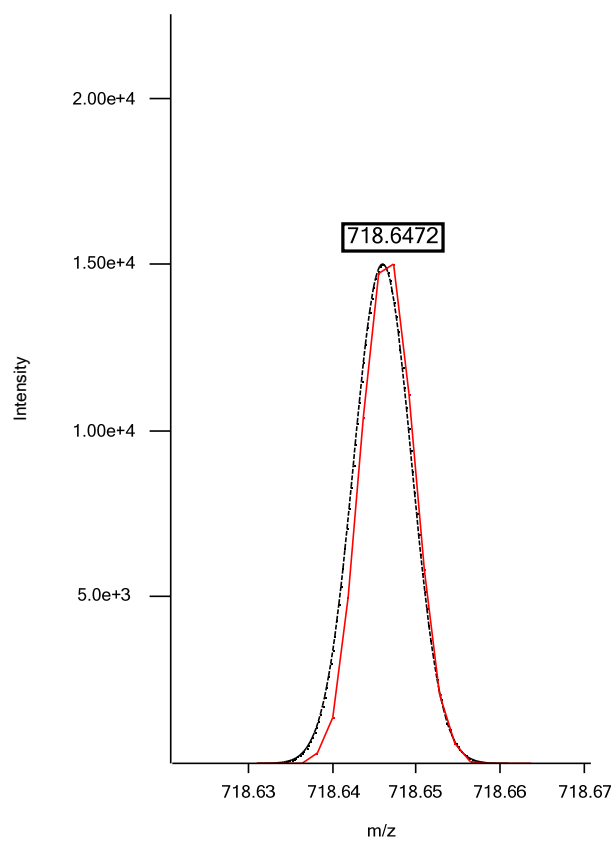

### Isotope 2

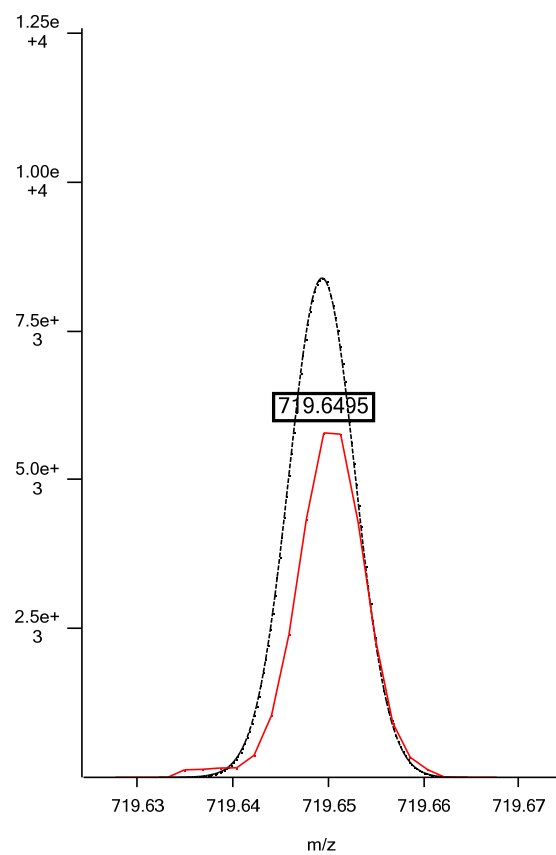

### Isotope 3

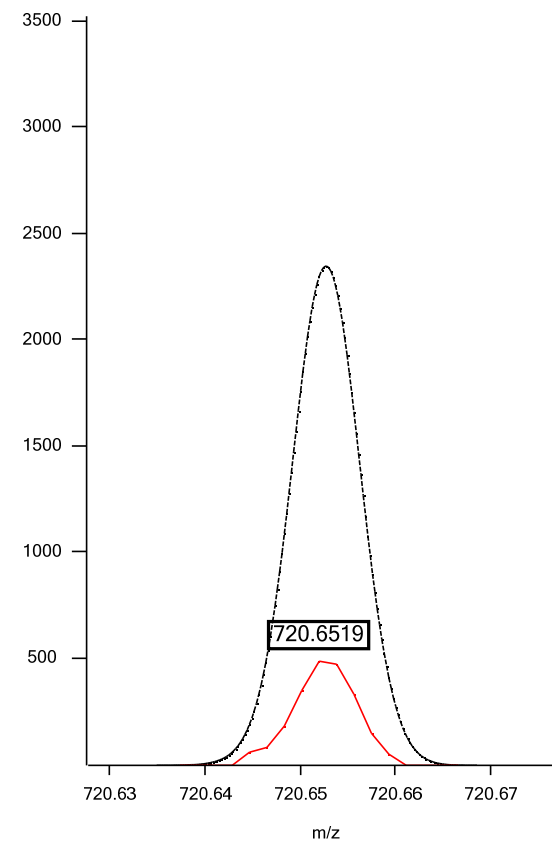

# Triacylglycerols

Positive ESI: TAG 46:3; C<sub>49</sub>H<sub>92</sub>NO<sub>6</sub>; theoretical *m/z* 790.6924, (M+NH<sub>4</sub>)<sup>+</sup>; isotopic fit 0.0242

### Isotope 1

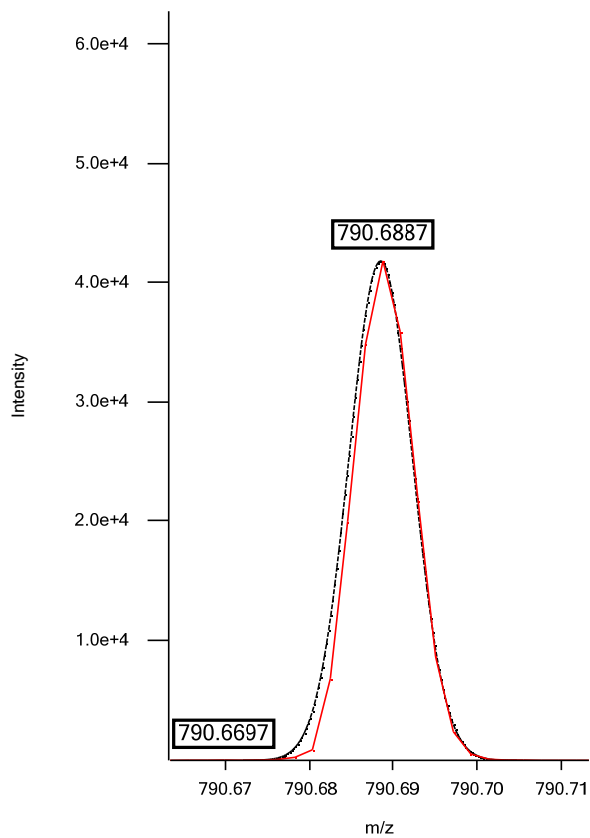

### Isotope 2

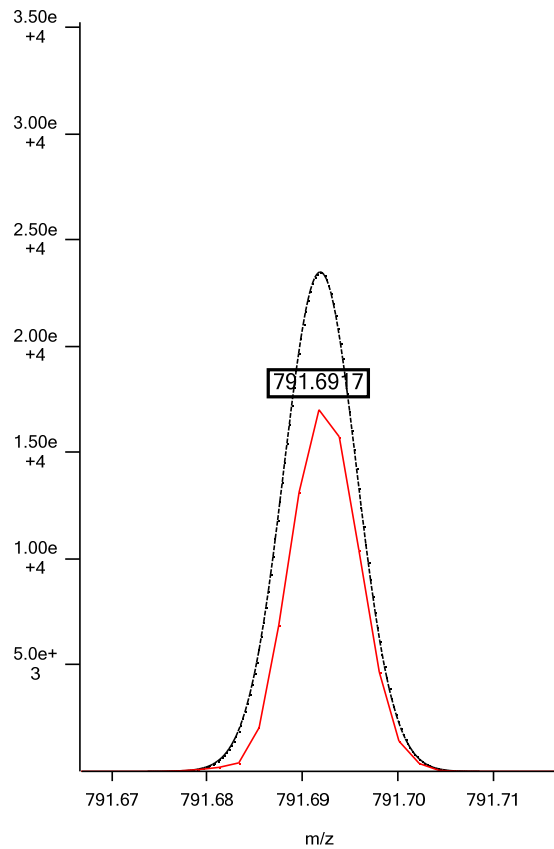

### Isotope 3

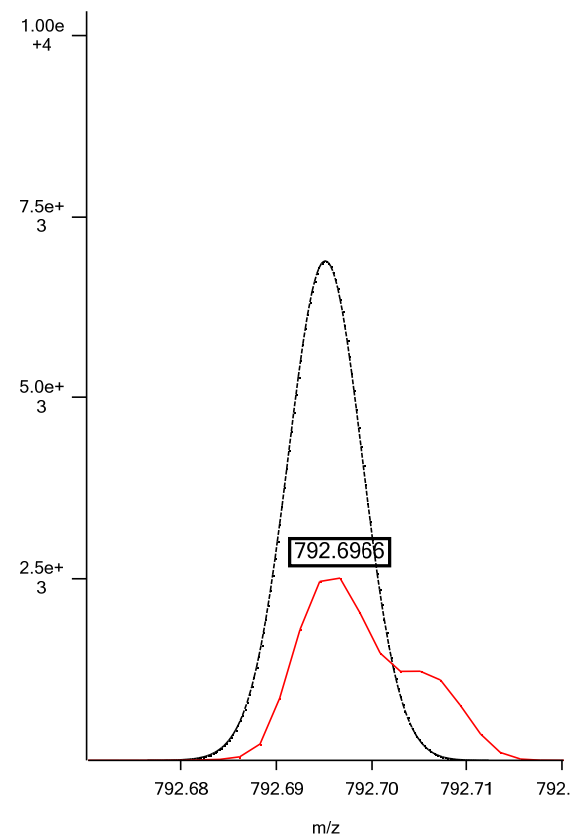



Positive ESI: TAG 46:2; C<sub>49</sub>H<sub>94</sub>NO<sub>6</sub>; theoretical *m/z* 792.7081, (M+NH<sub>4</sub>)<sup>+</sup>; isotopic fit 0.0259

### Isotope 1

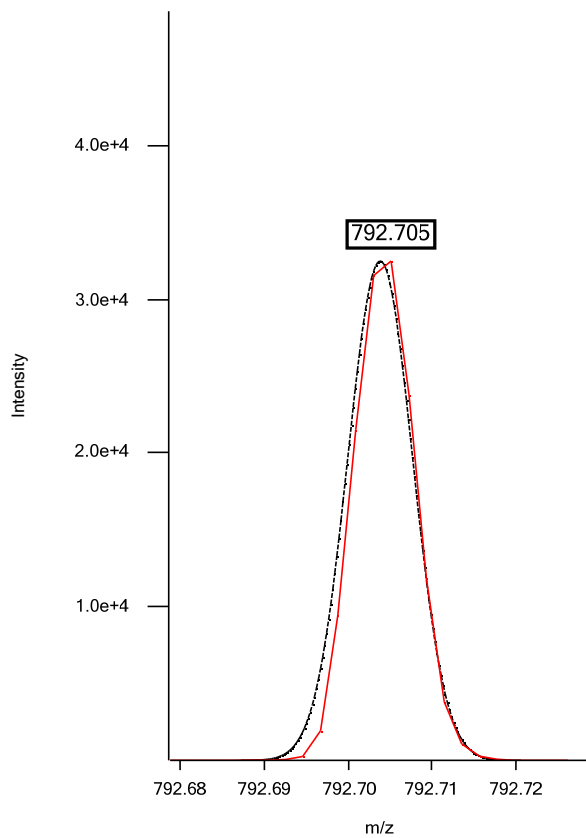

### Isotope 2

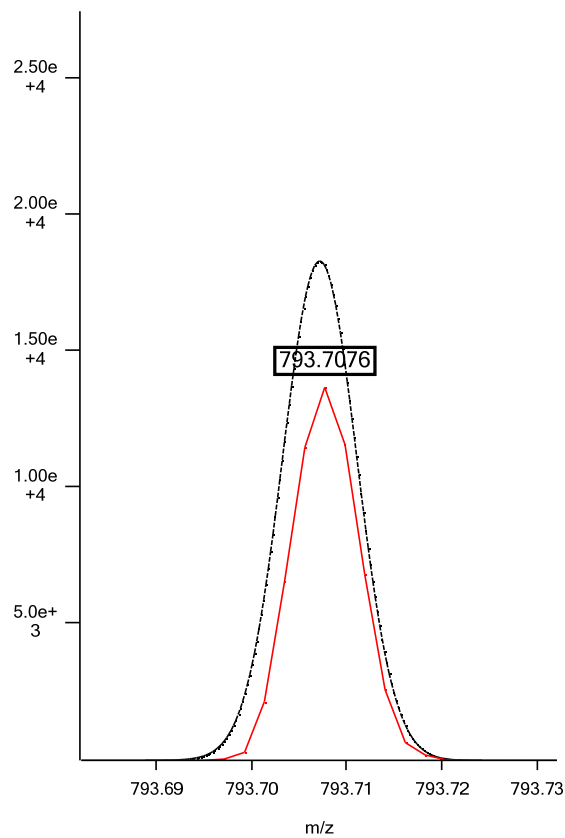

### Isotope 3

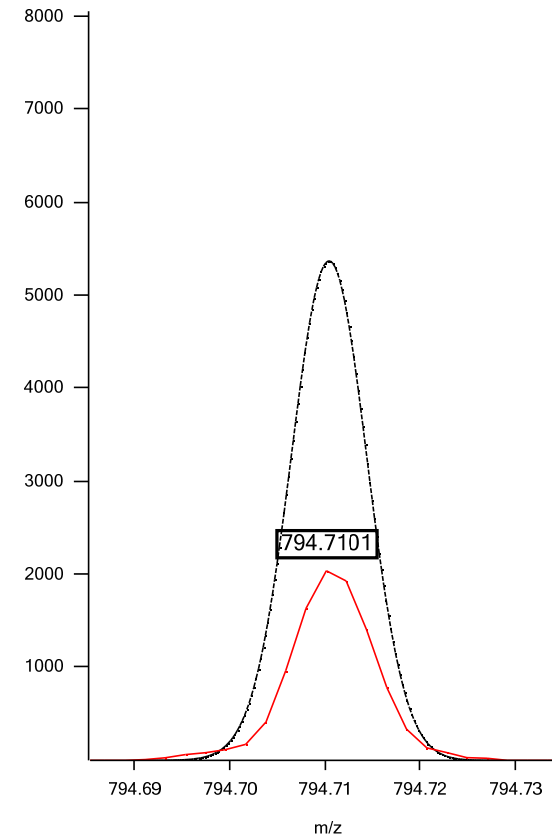

Positive ESI: TAG 46:1; C<sub>49</sub>H<sub>96</sub>NO<sub>6</sub>; theoretical *m/z* 794.7237, (M+NH<sub>4</sub>)<sup>+</sup>; isotopic fit 0.0096

### Isotope 1

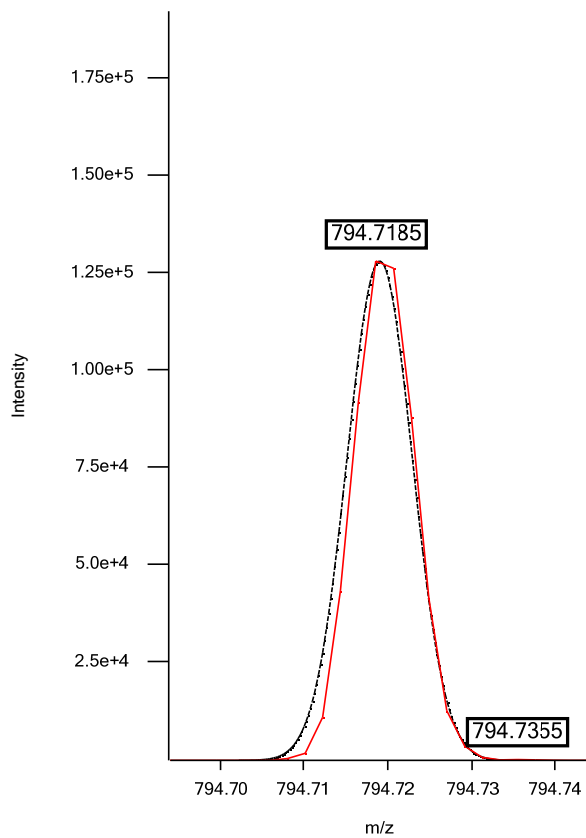

### Isotope 2

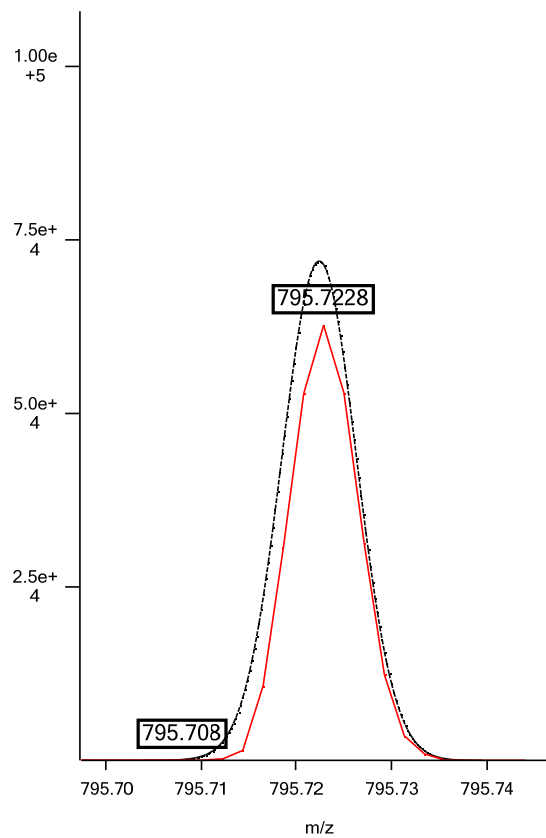

### Isotope 3

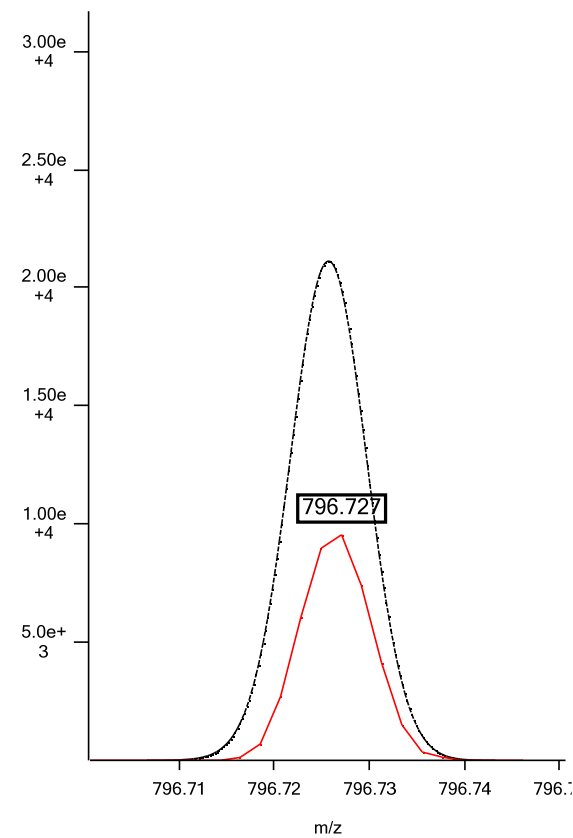

Positive ESI: TAG 46:0; C<sub>49</sub>H<sub>98</sub>NO<sub>6</sub>; theoretical *m/z* 796.7394, (M+NH<sub>4</sub>)<sup>+</sup>; isotopic fit 0.0065

### Isotope 1

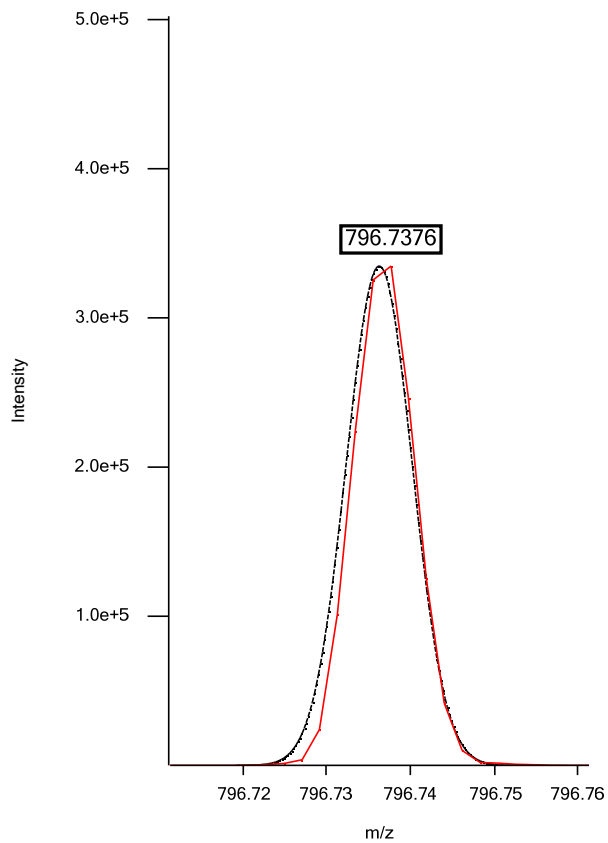

### Isotope 2

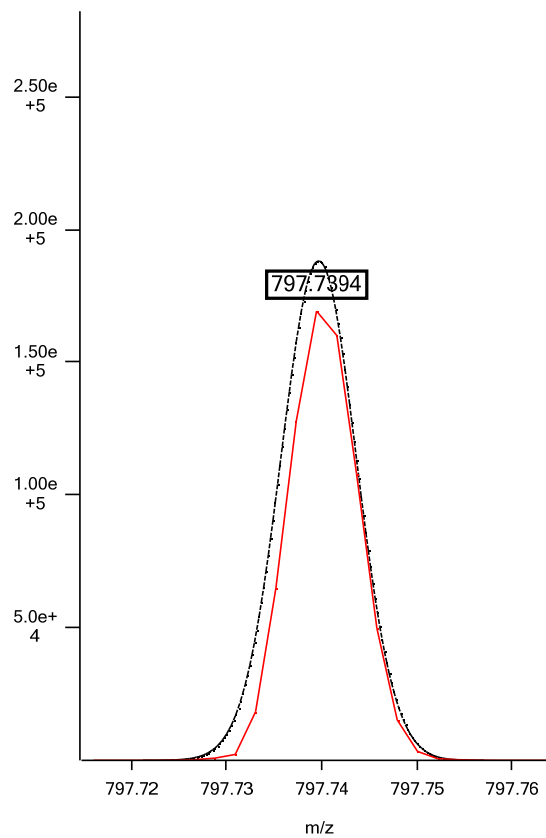

### Isotope 3

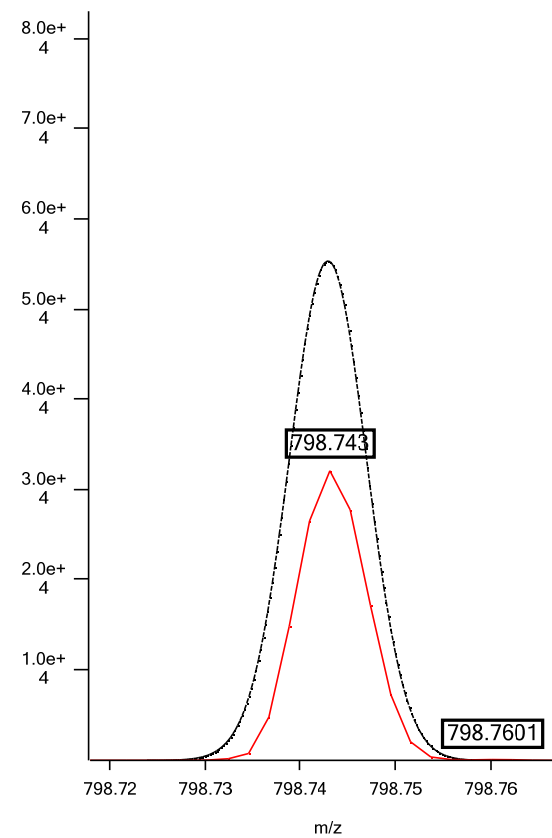

Positive ESI: TAG 47:0; C<sub>50</sub>H<sub>100</sub>NO<sub>6</sub>; theoretical *m/z* 810.7550, (M+NH<sub>4</sub>)<sup>+</sup>; isotopic fit 0.0248

### Isotope 1

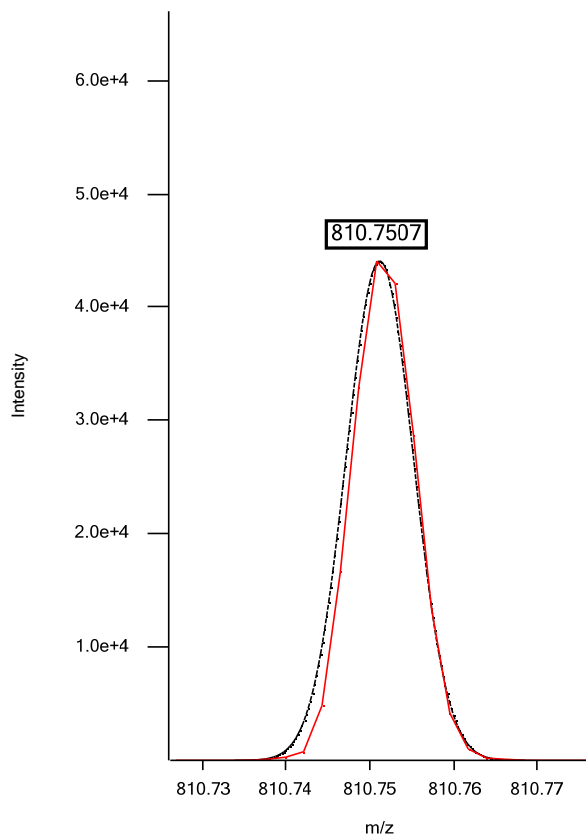

### Isotope 2

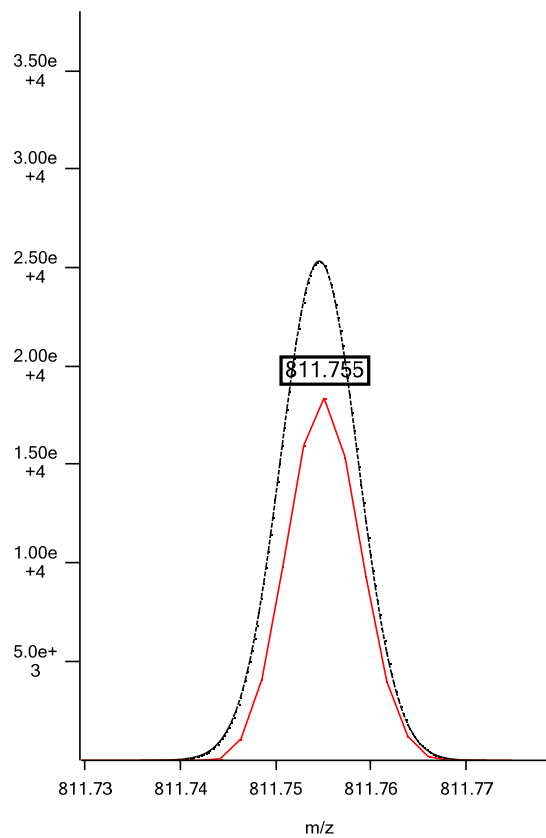

### Isotope 3

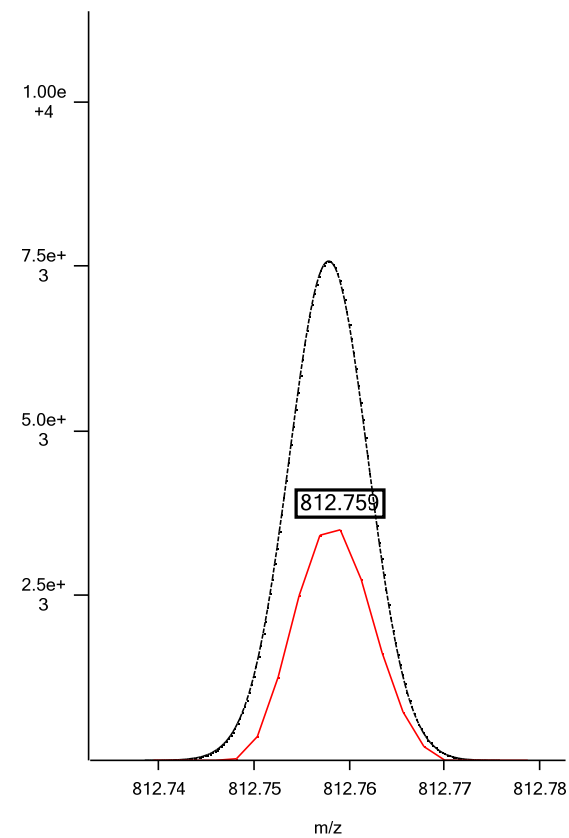

Positive ESI: TAG 47:2; C<sub>50</sub>H<sub>96</sub>NO<sub>6</sub>; theoretical  $m/z$  806.7237, (M+NH<sub>4</sub>)<sup>+</sup>; isotopic fit 0.0266

### Isotope 1

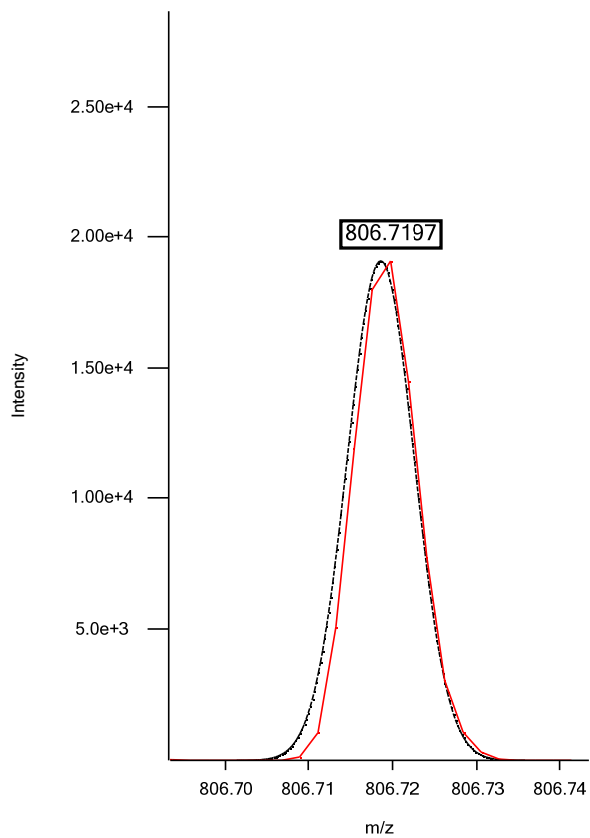

### Isotope 2

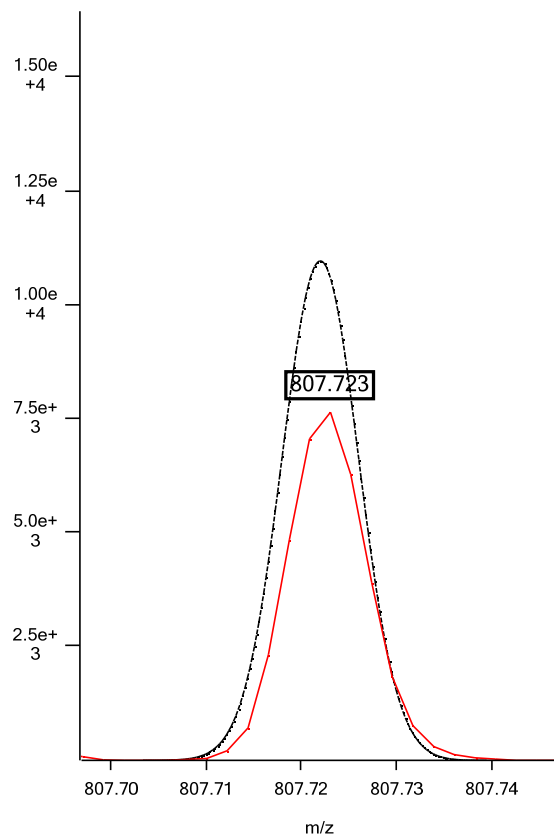

### Isotope 3

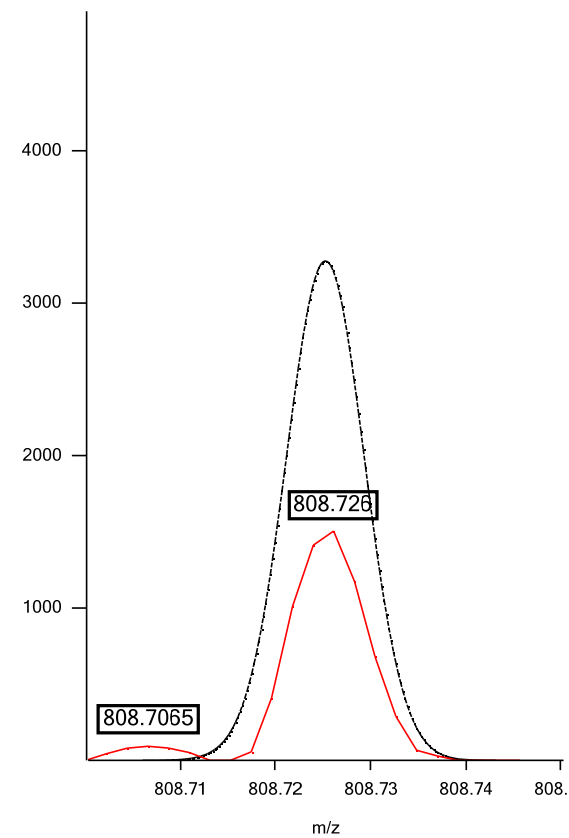

Positive ESI: TAG 47:1; C<sub>50</sub>H<sub>98</sub>NO<sub>6</sub>; theoretical  $m/z$  808.7394, (M+NH<sub>4</sub>)<sup>+</sup>; isotopic fit 0.0415

### Isotope 1

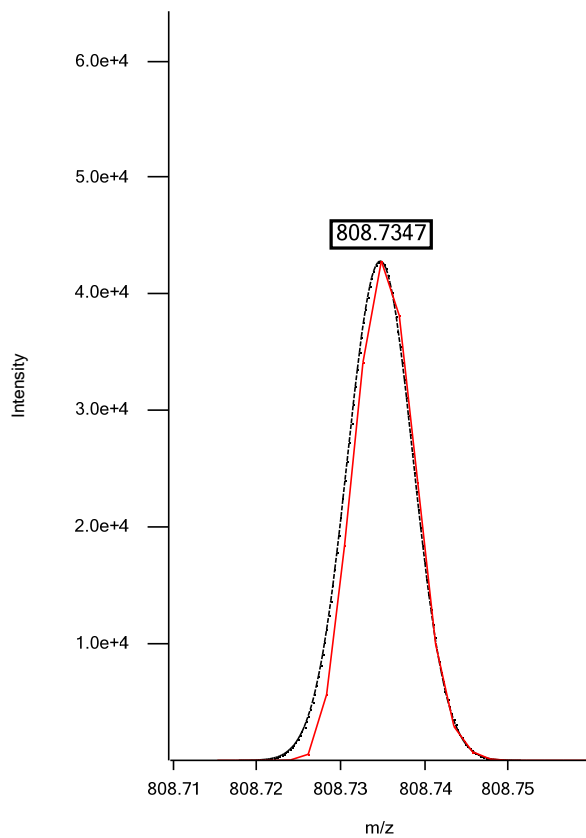

### Isotope 2

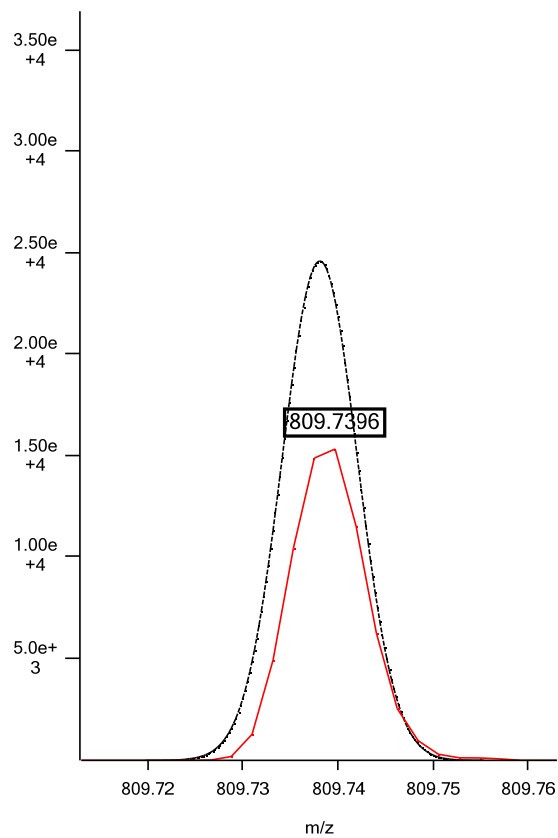

### Isotope 3

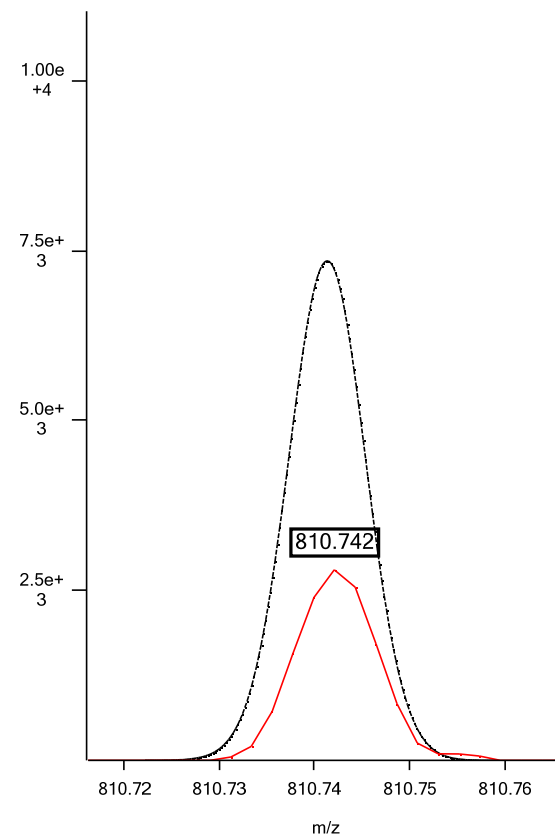

Positive ESI: TAG 48:1;  $C_{51}H_{100}NO_6$ ; theoretical  $m/z$  822.7550,  $(M+NH_4)^+$ ; isotopic fit 0.0057

### Isotope 1

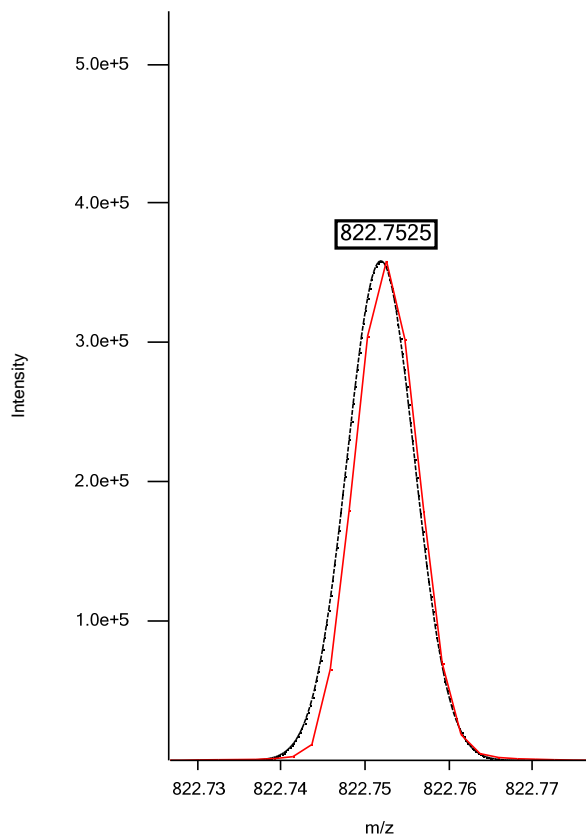

### Isotope 2

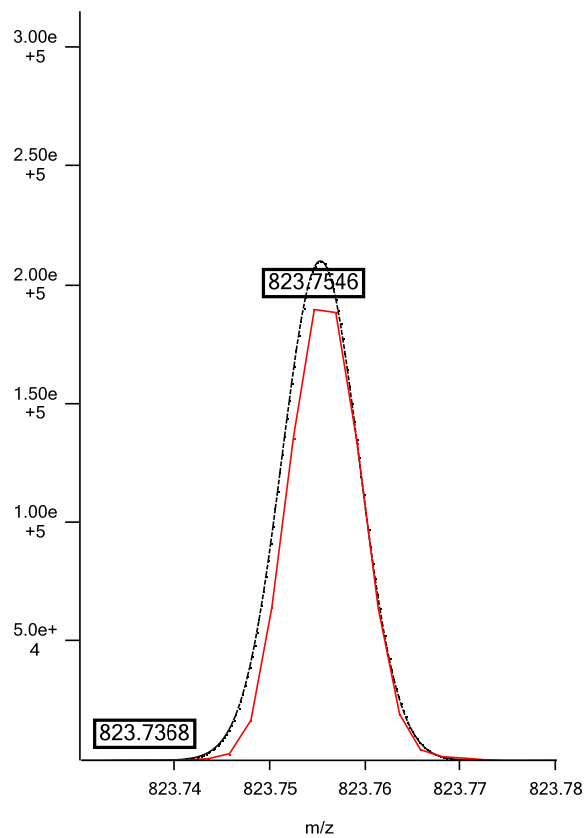

### Isotope 3

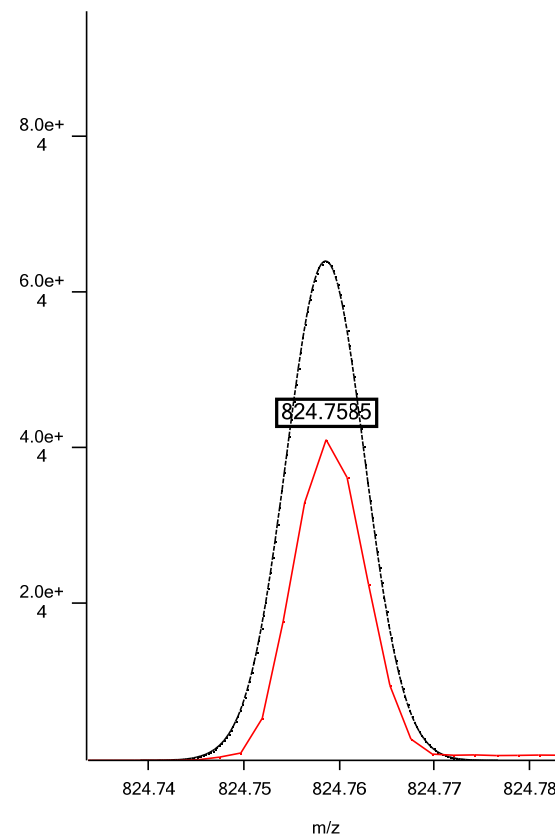

Positive ESI: TAG 48:0; C<sub>51</sub>H<sub>102</sub>NO<sub>6</sub>; theoretical *m/z* 824.7707, (M+NH<sub>4</sub>)<sup>+</sup>; isotopic fit 0.0162

### Isotope 1

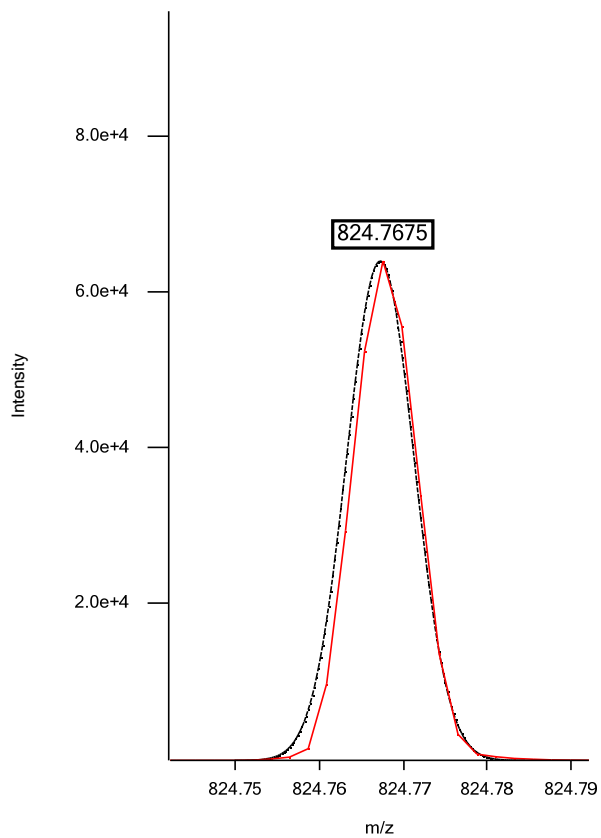

### Isotope 2

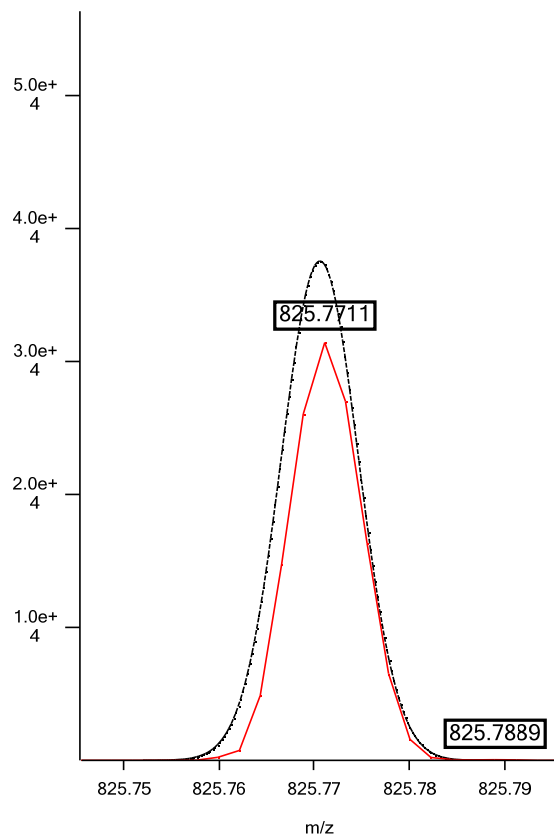

### Isotope 3

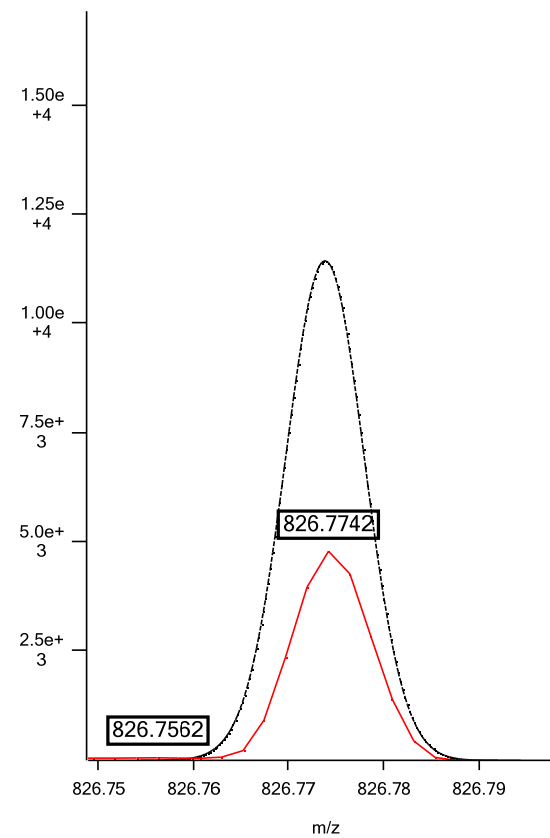



Positive ESI: TAG 48:4; C<sub>51</sub>H<sub>94</sub>NO<sub>6</sub>; theoretical  $m/z$  816.7081, (M+NH<sub>4</sub>)<sup>+</sup>; isotopic fit 0.0188

### Isotope 1

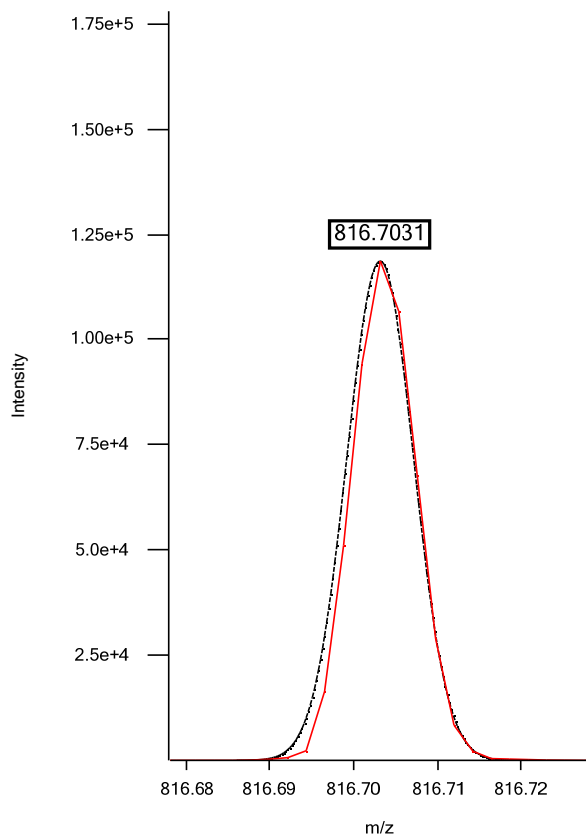

### Isotope 2

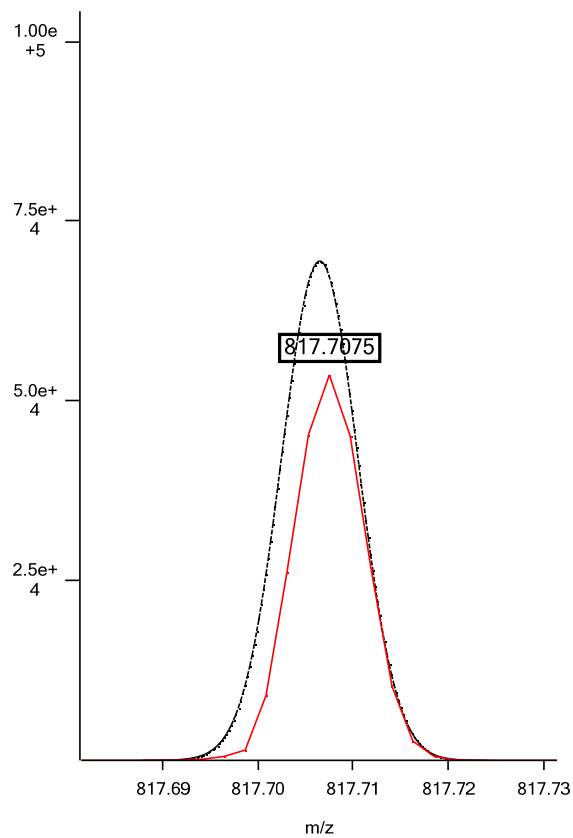

### Isotope 3

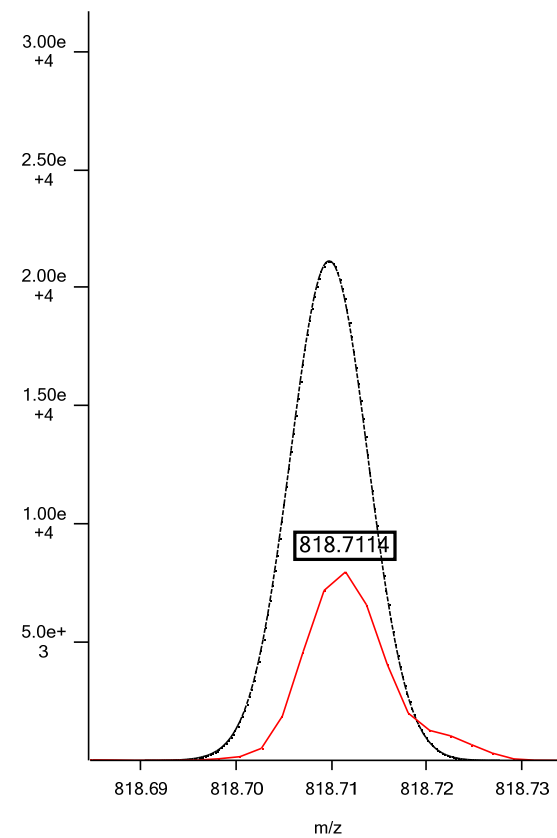

Positive ESI: TAG 48:3; C<sub>51</sub>H<sub>96</sub>NO<sub>6</sub>; theoretical  $m/z$  818.7238, (M+NH<sub>4</sub>)<sup>+</sup>; isotopic fit 0.0169

### Isotope 1

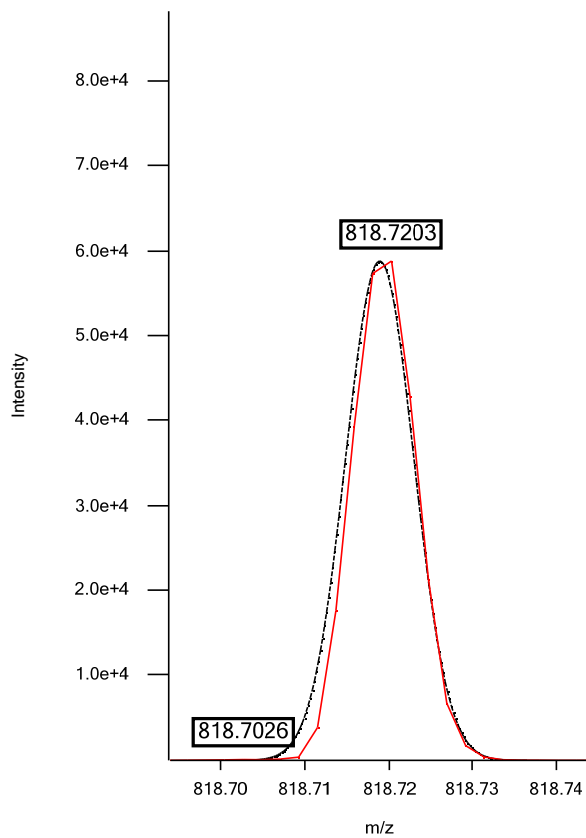

### Isotope 2

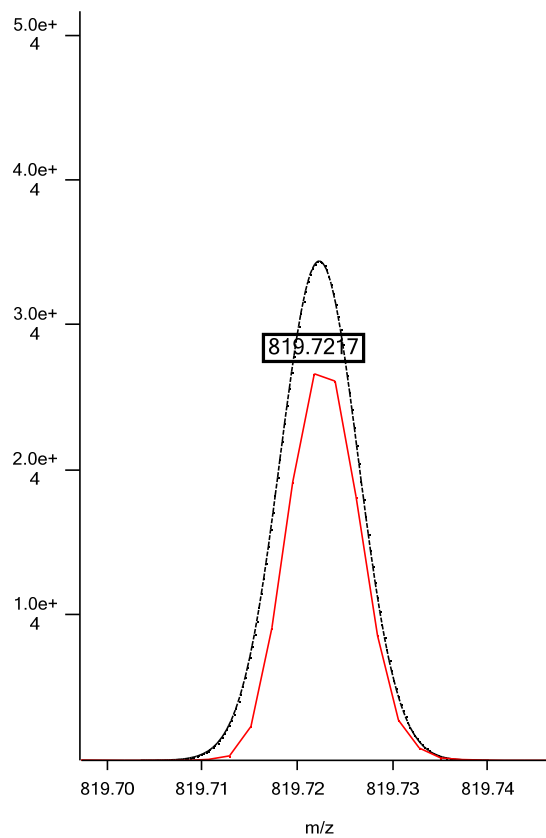

### Isotope 3

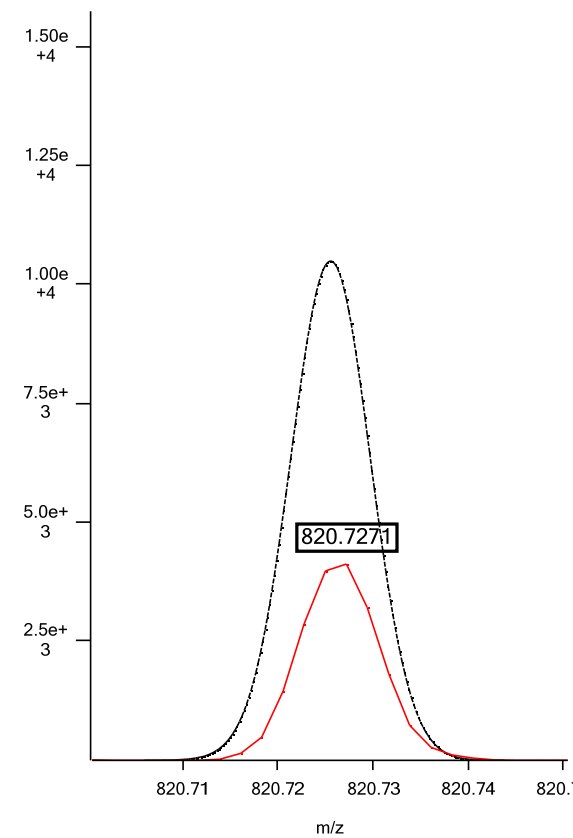

Positive ESI: TAG 48:2; C<sub>51</sub>H<sub>98</sub>NO<sub>6</sub>; theoretical  $m/z$  820.7394, (M+NH<sub>4</sub>)<sup>+</sup>; isotopic fit 0.0029

### Isotope 1

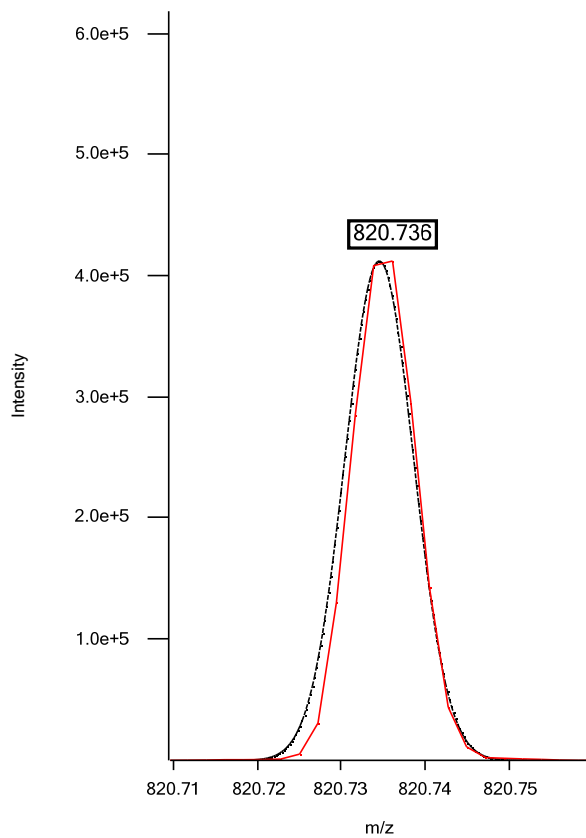

### Isotope 2

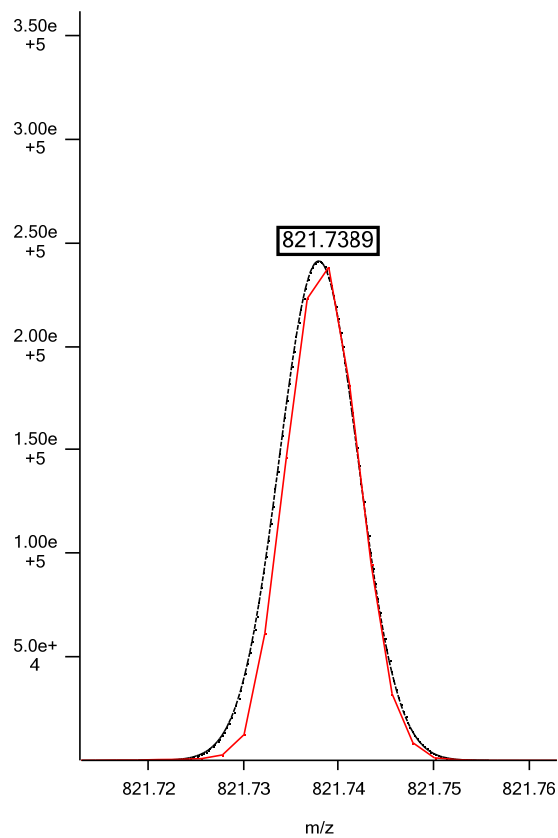

### Isotope 3

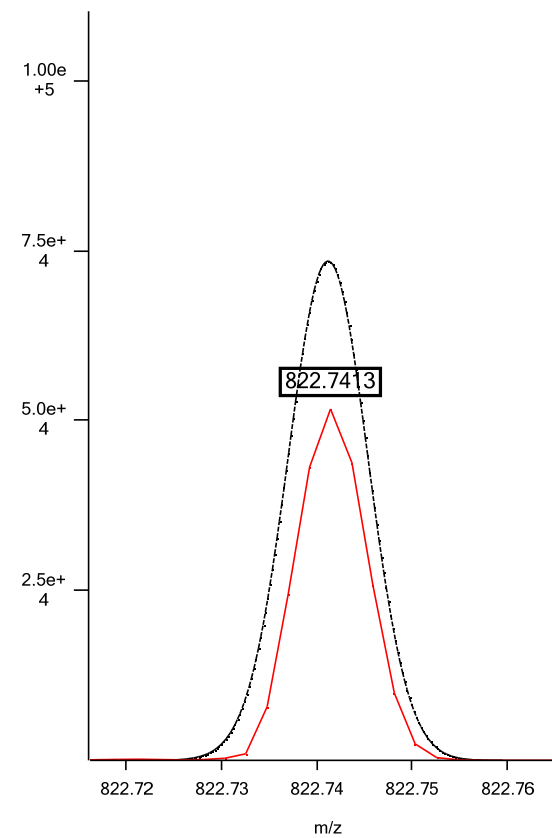

Positive ESI: TAG 49:2; C<sub>52</sub>H<sub>100</sub>NO<sub>6</sub>; theoretical  $m/z$  834.7550, (M+NH<sub>4</sub>)<sup>+</sup>; isotopic fit 0.0180

### Isotope 1

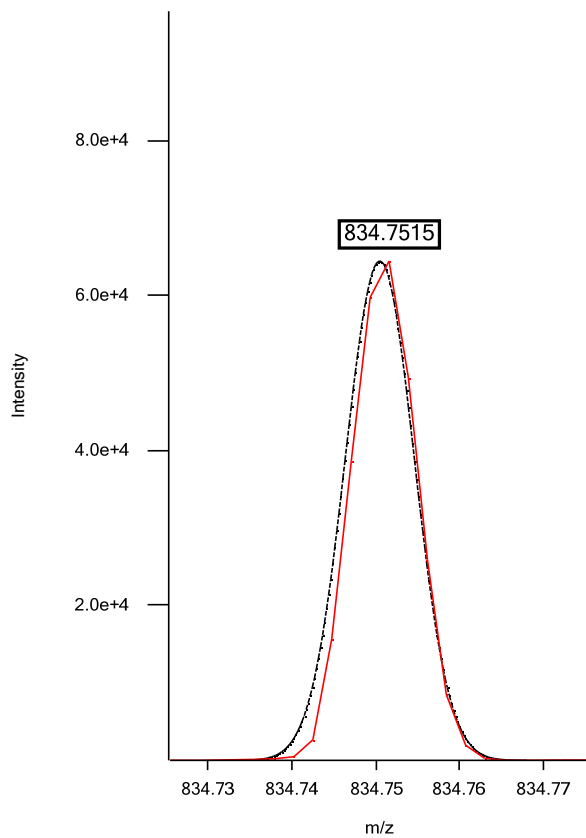

### Isotope 2

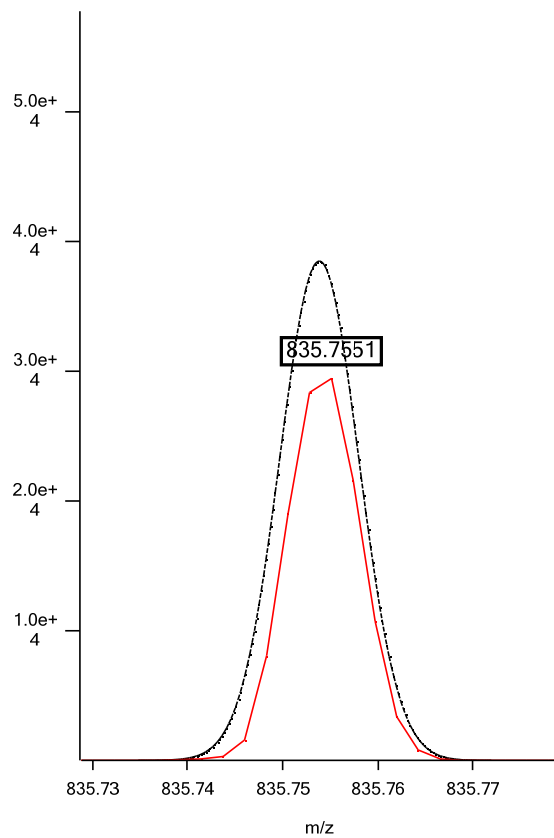

### Isotope 3

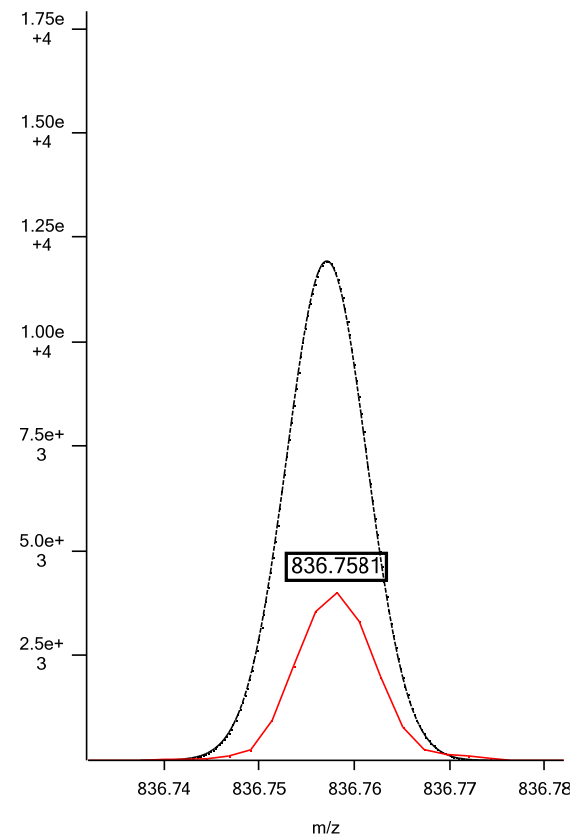

Positive ESI: TAG 49:1; C<sub>52</sub>H<sub>102</sub>NO<sub>6</sub>; theoretical *m/z* 836.7707, (M+NH<sub>4</sub>)<sup>+</sup>; isotopic fit 0.0162

### Isotope 1

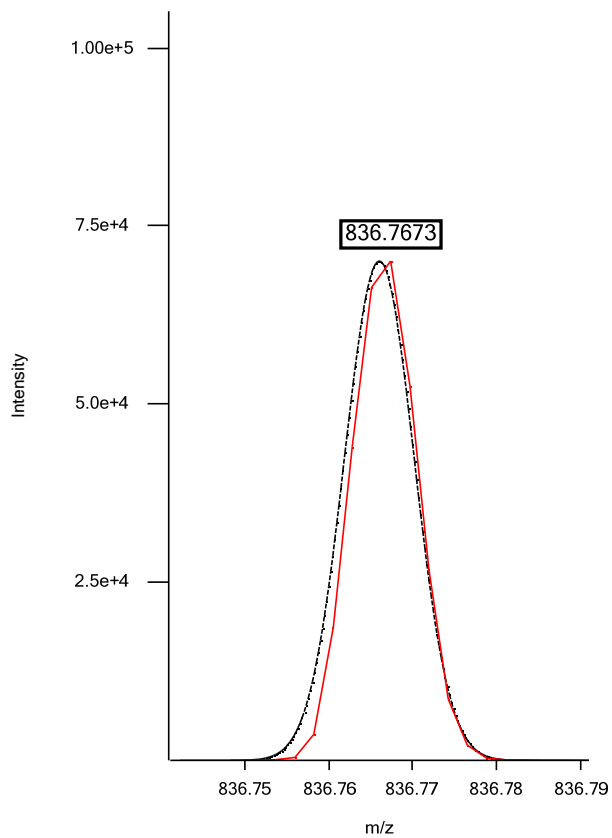

### Isotope 2

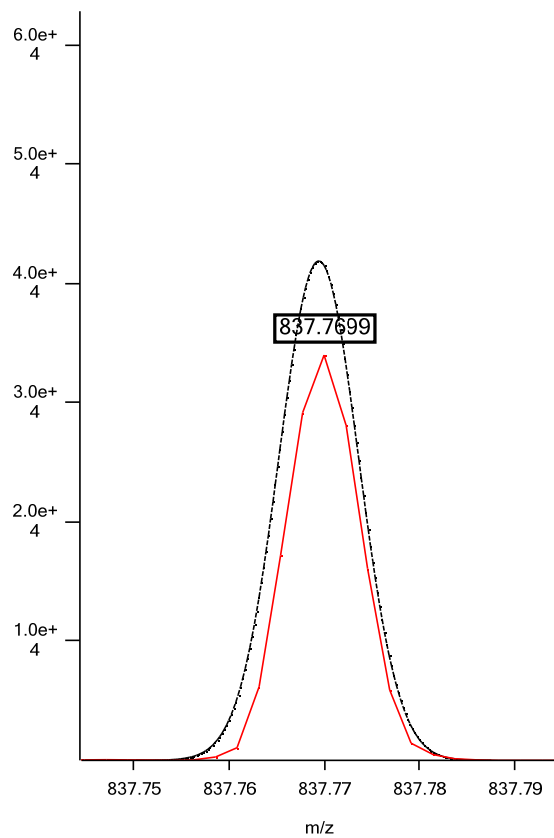

### Isotope 3

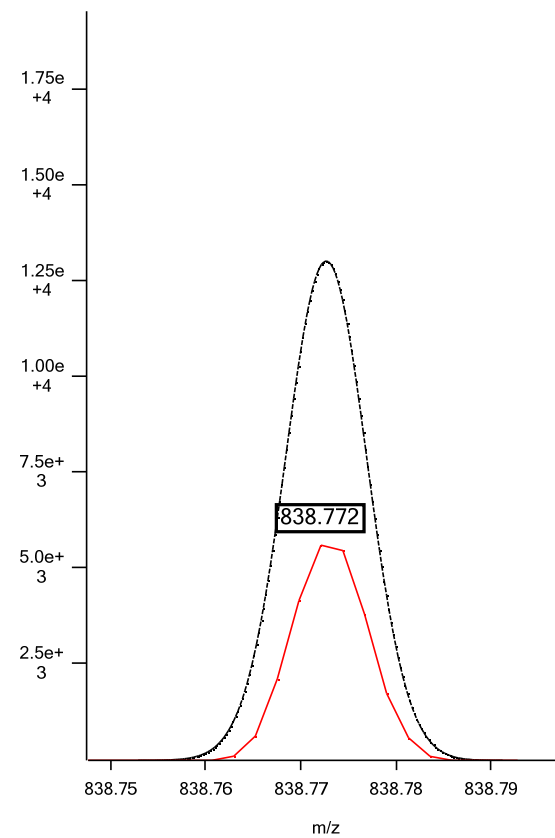

Positive ESI: TAG 49:4; C<sub>52</sub>H<sub>96</sub>NO<sub>6</sub>; theoretical  $m/z$  830.7237, (M+NH<sub>4</sub>)<sup>+</sup>; isotopic fit 0.0258

### Isotope 1

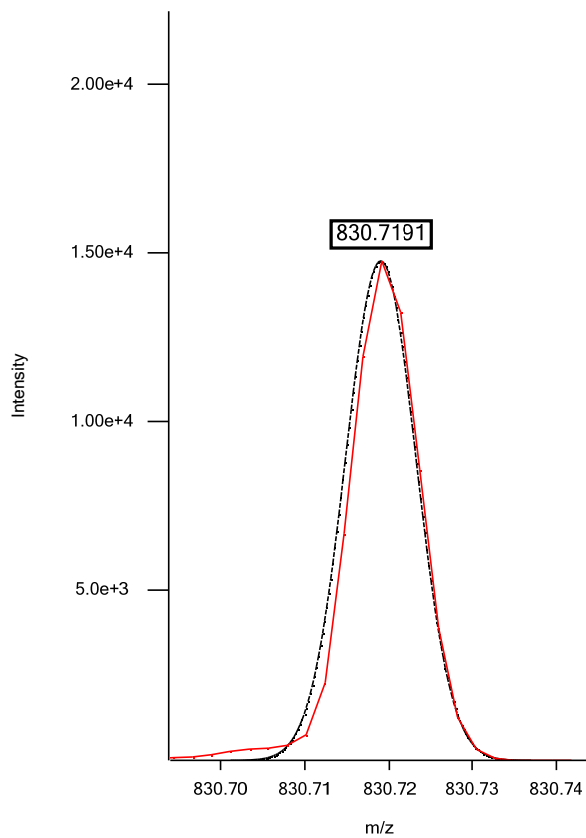

### Isotope 2

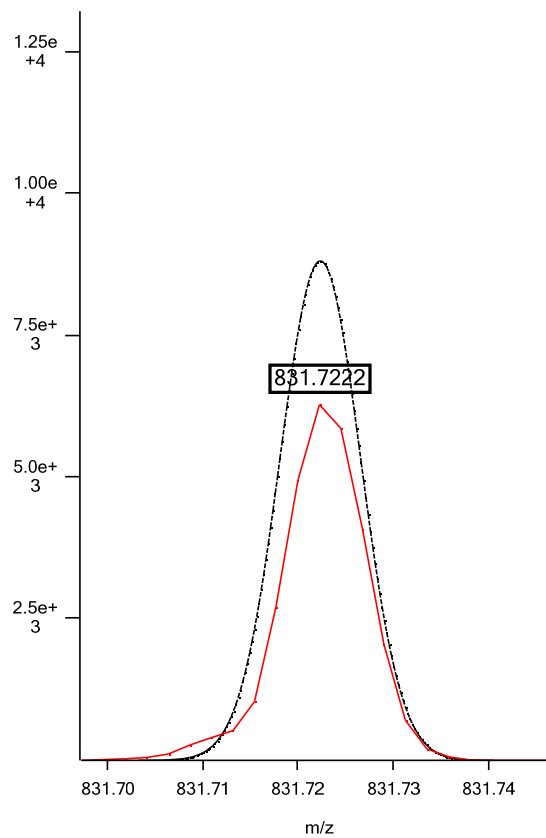

### Isotope 3

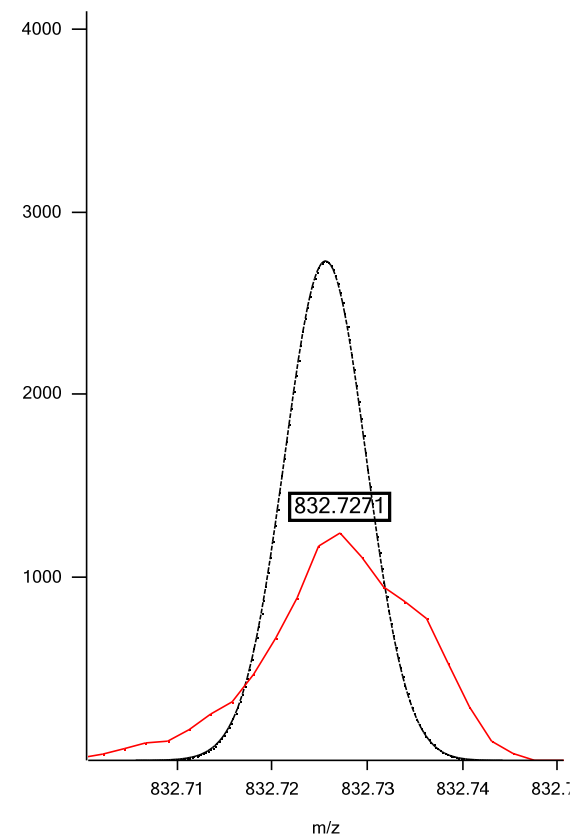

Positive ESI: TAG 49:3; C<sub>52</sub>H<sub>98</sub>NO<sub>6</sub>; theoretical *m/z* 832.7394, (M+NH<sub>4</sub>)<sup>+</sup>; isotopic fit 0.0272

### Isotope 1

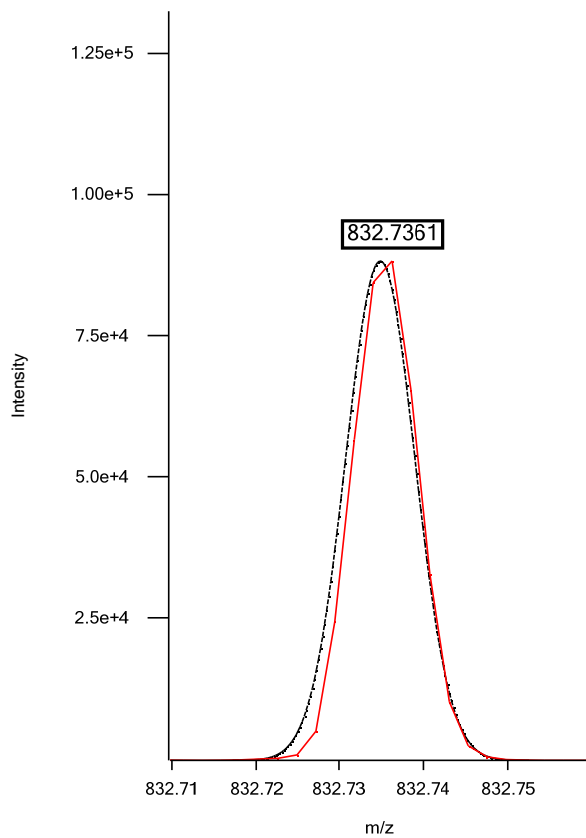

### Isotope 2

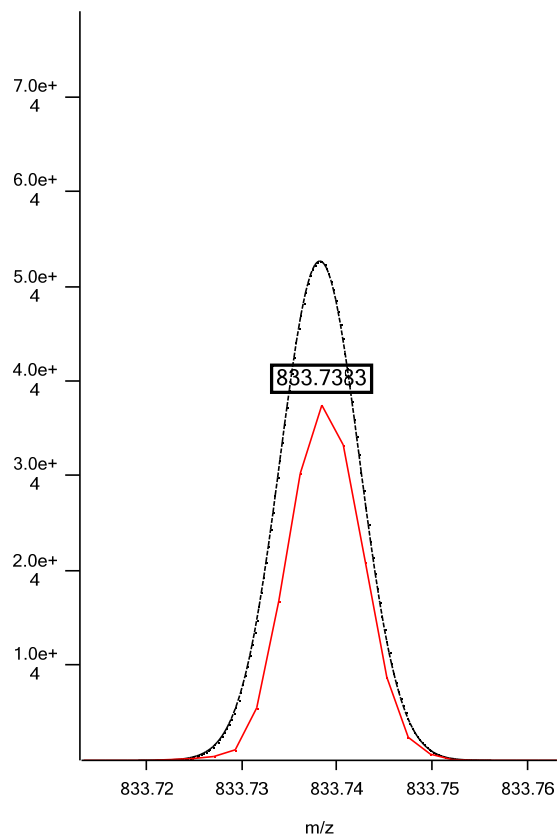

### Isotope 3

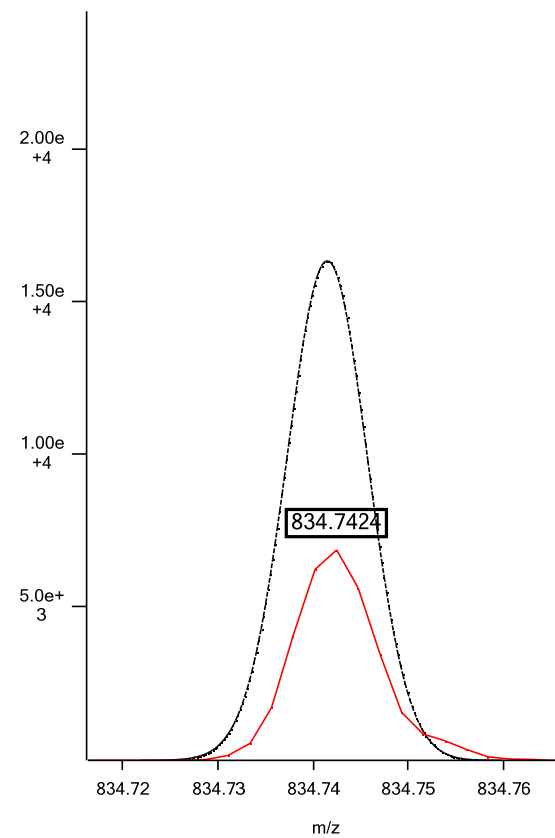

Positive ESI: TAG 50:3; C<sub>53</sub>H<sub>100</sub>NO<sub>6</sub>; theoretical *m/z* 846.7551, (M+NH<sub>4</sub>)<sup>+</sup>; isotopic fit 0.0043

### Isotope 1

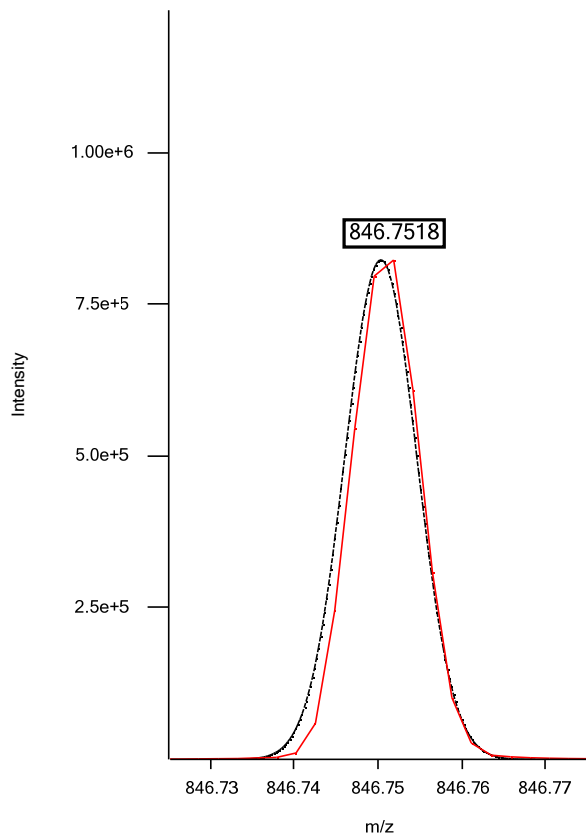

### Isotope 2

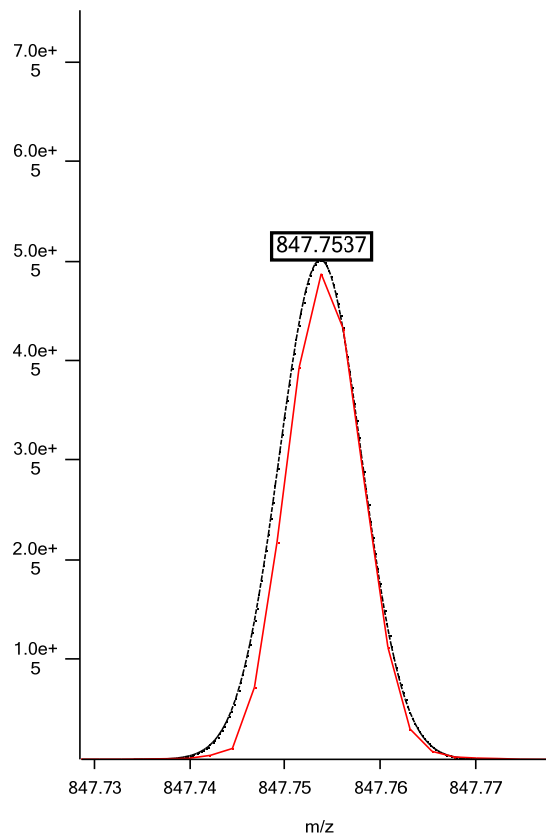

### Isotope 3

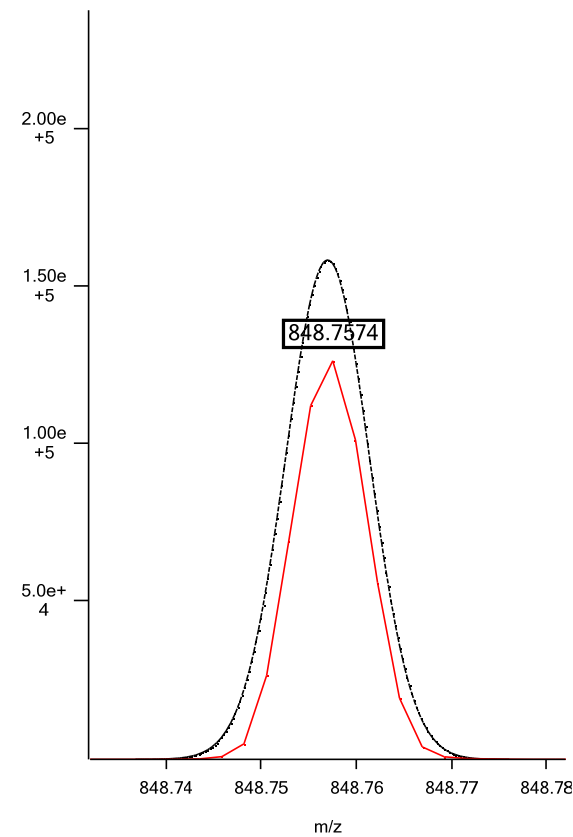



Positive ESI: TAG 50:2; C<sub>53</sub>H<sub>102</sub>NO<sub>6</sub>; theoretical *m/z* 848.7707, (M+NH<sub>4</sub>)<sup>+</sup>; isotopic fit 0.0033

### Isotope 1

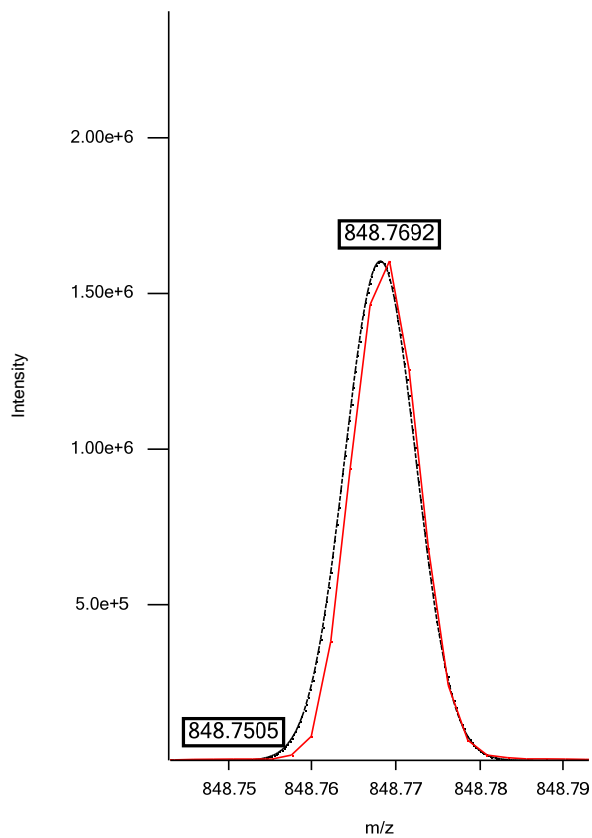

### Isotope 2

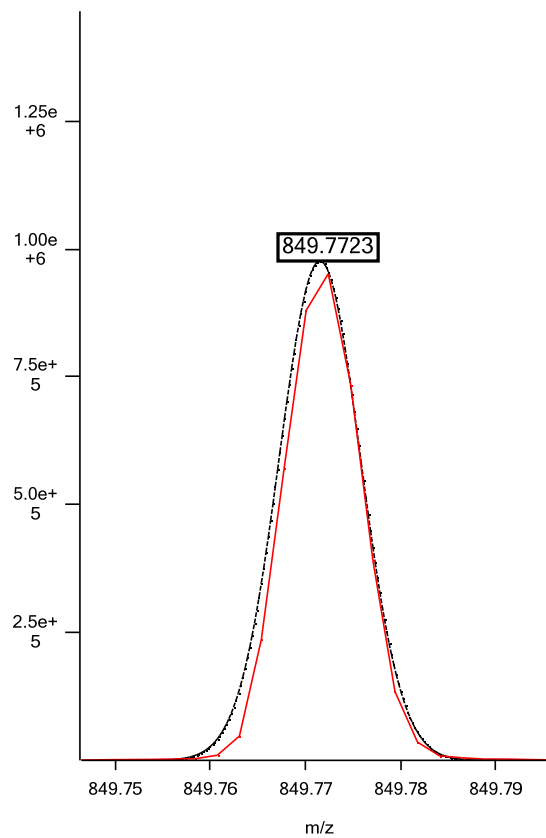

### Isotope 3

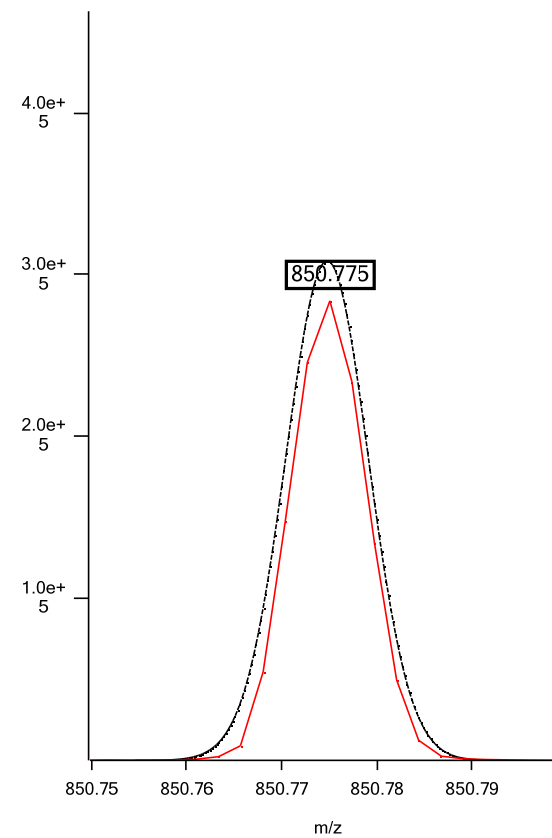

Positive ESI: TAG 50:1;  $C_{53}H_{104}NO_6$ ; theoretical  $m/z$  850.7864,  $(M+NH_4)^+$ ; isotopic fit 0.0033

### Isotope 1

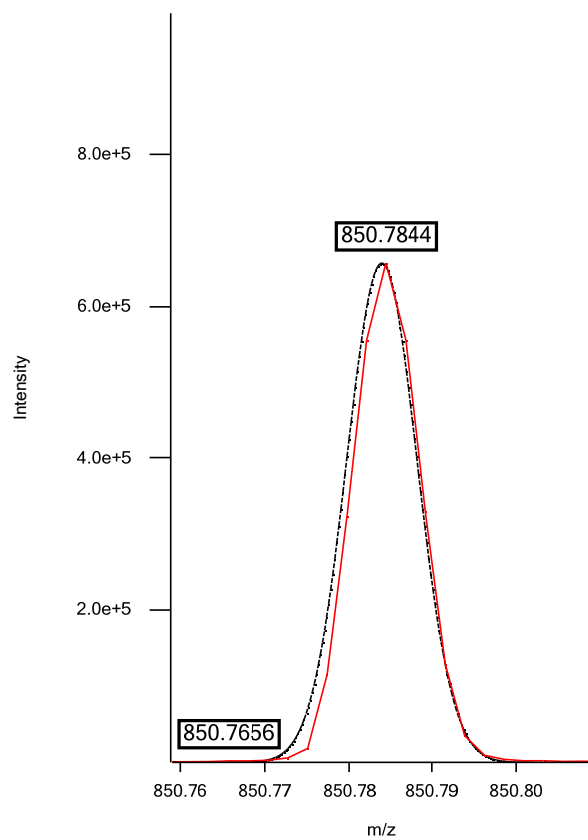

### Isotope 2

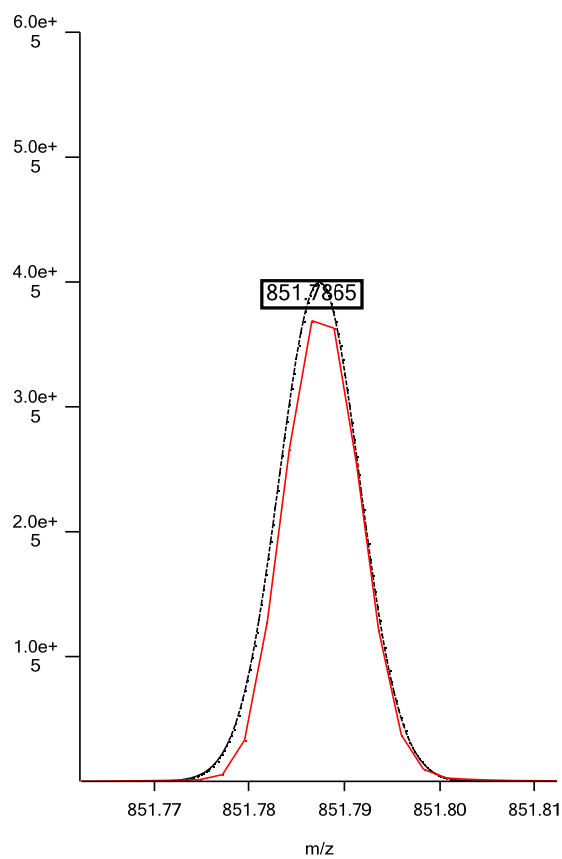

### Isotope 3

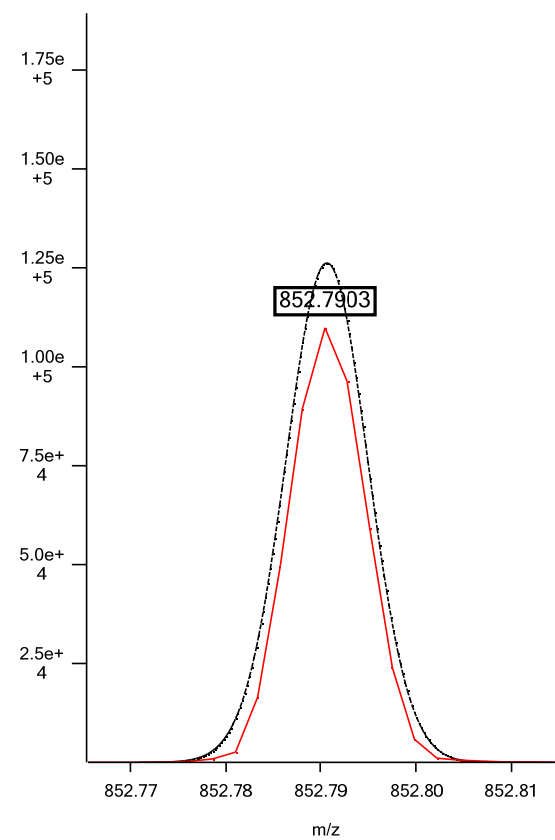

Positive ESI: TAG 50:0; C<sub>53</sub>H<sub>106</sub>NO<sub>6</sub>; theoretical *m/z* 852.8020, (M+NH<sub>4</sub>)<sup>+</sup>; isotopic fit 0.0409

### Isotope 1

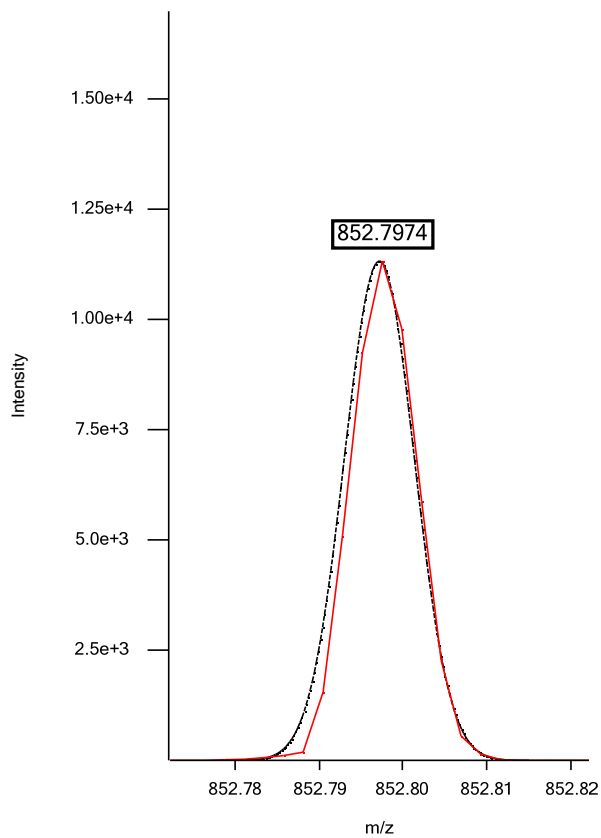

### Isotope 2

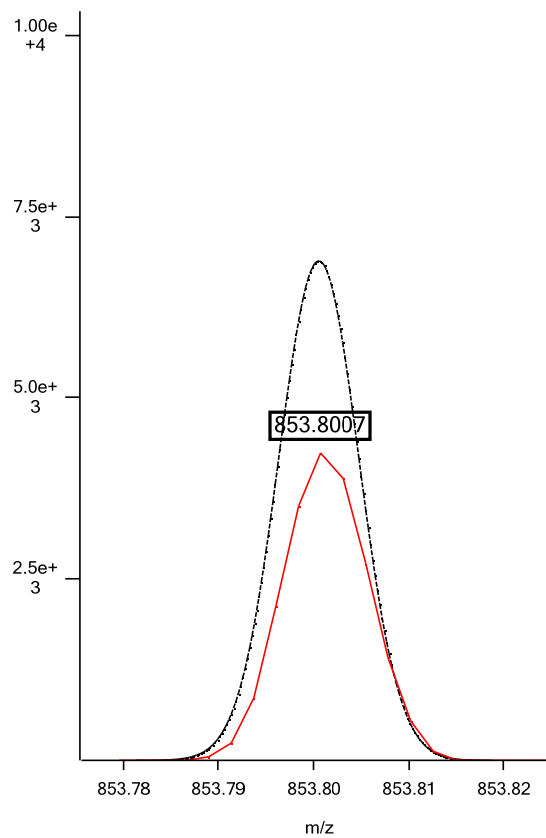

### Isotope 3

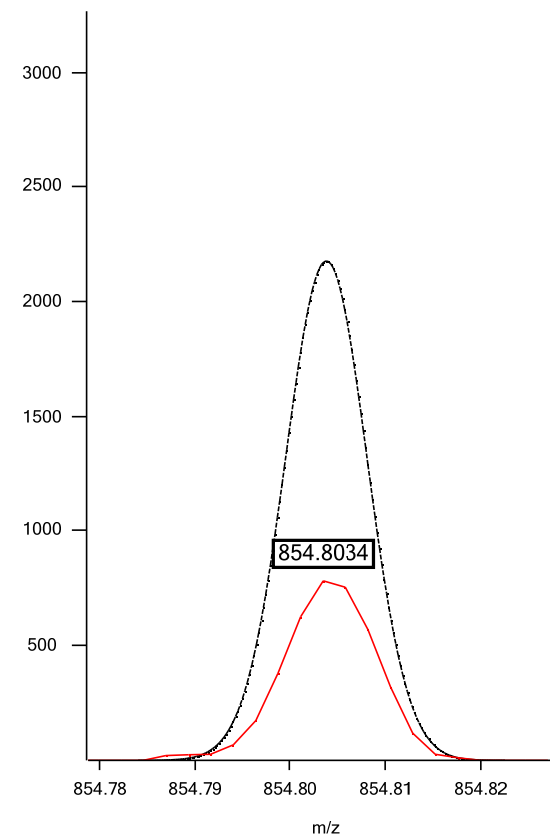

Positive ESI: TAG 50:6; C<sub>53</sub>H<sub>94</sub>NO<sub>6</sub>; theoretical *m/z* 840.7081, (M+NH<sub>4</sub>)<sup>+</sup>; isotopic fit 0.0375

### Isotope 1

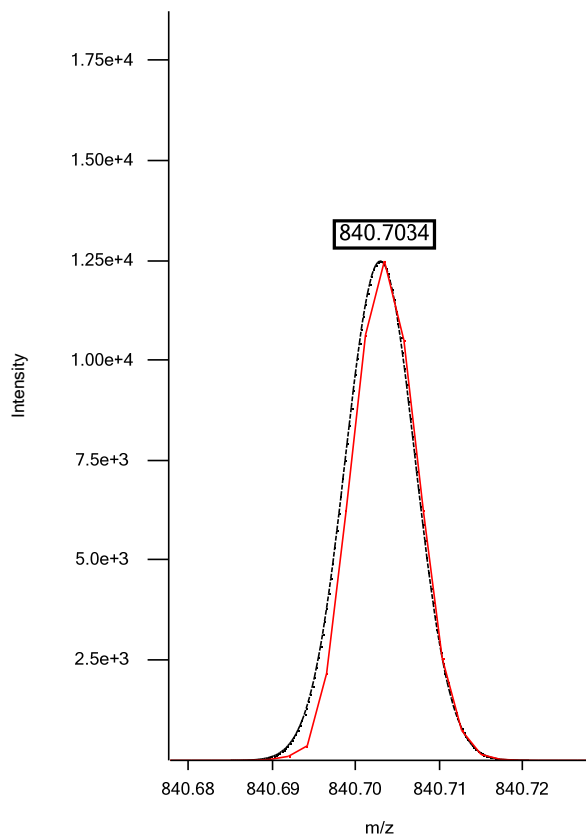

### Isotope 2

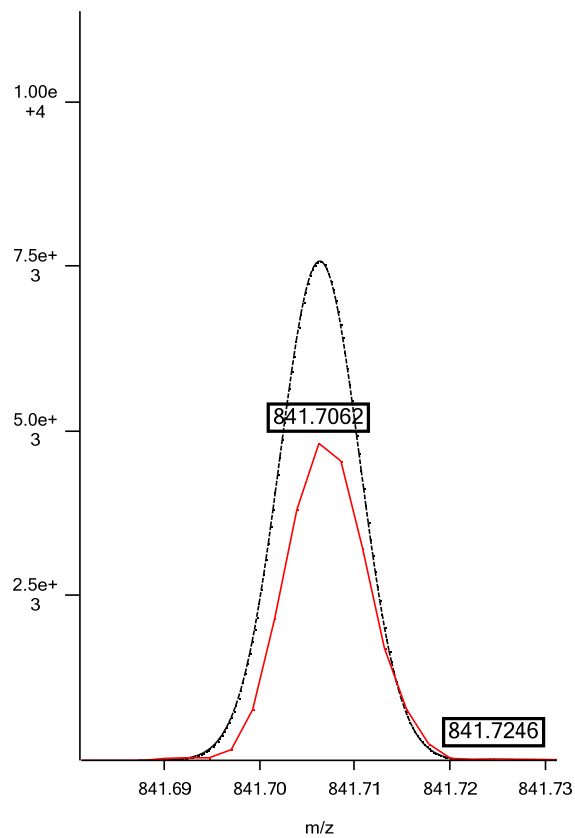

### Isotope 3

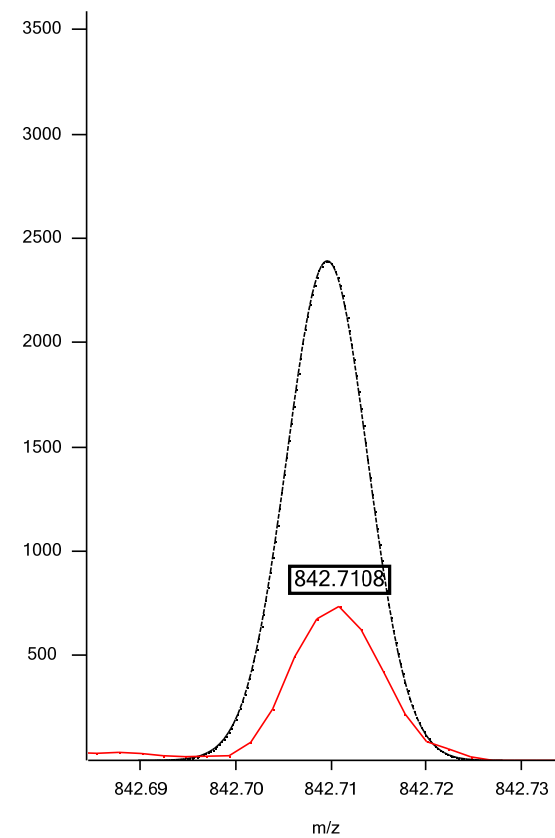

Positive ESI: TAG 50:5; C<sub>53</sub>H<sub>96</sub>NO<sub>6</sub>; theoretical  $m/z$  842.7237, (M+NH<sub>4</sub>)<sup>+</sup>; isotopic fit 0.0052

### Isotope 1

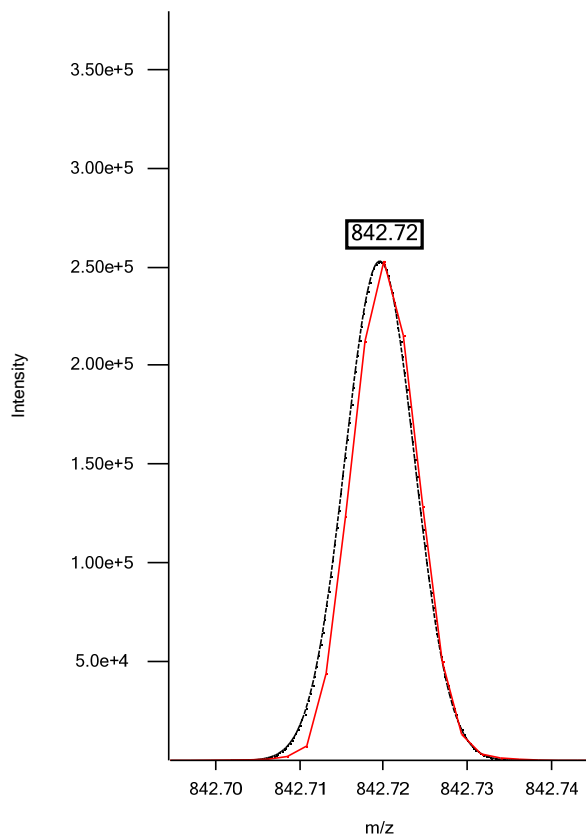

### Isotope 2

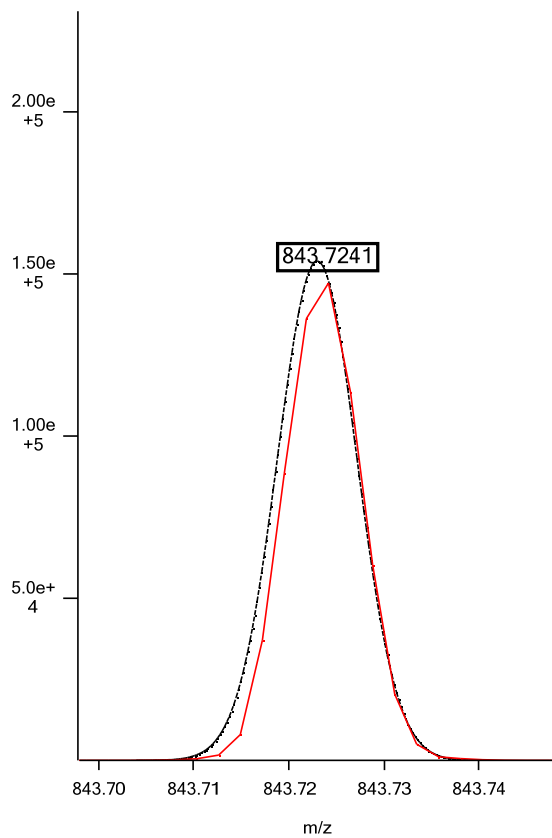

### Isotope 3

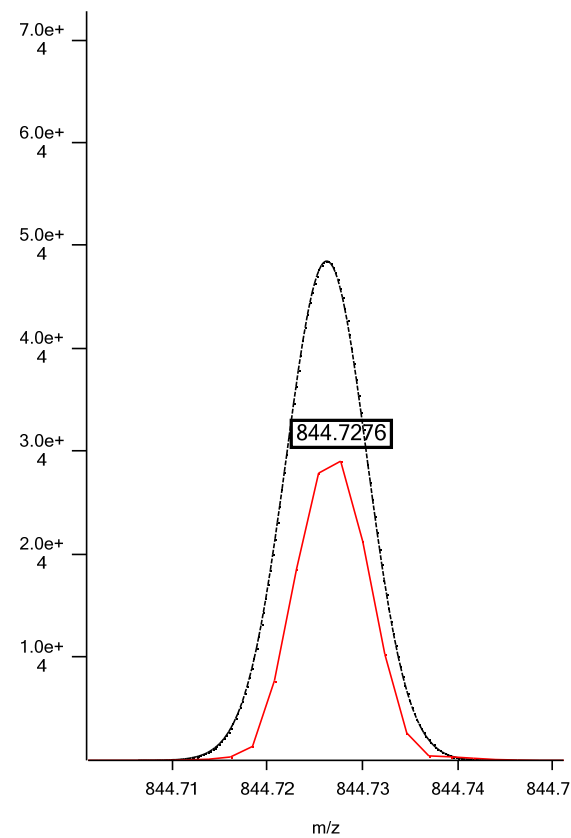

Positive ESI: TAG 50:4; C<sub>53</sub>H<sub>98</sub>NO<sub>6</sub>; theoretical *m/z* 844.7394, (M+NH<sub>4</sub>)<sup>+</sup>; isotopic fit 0.0117

### Isotope 1

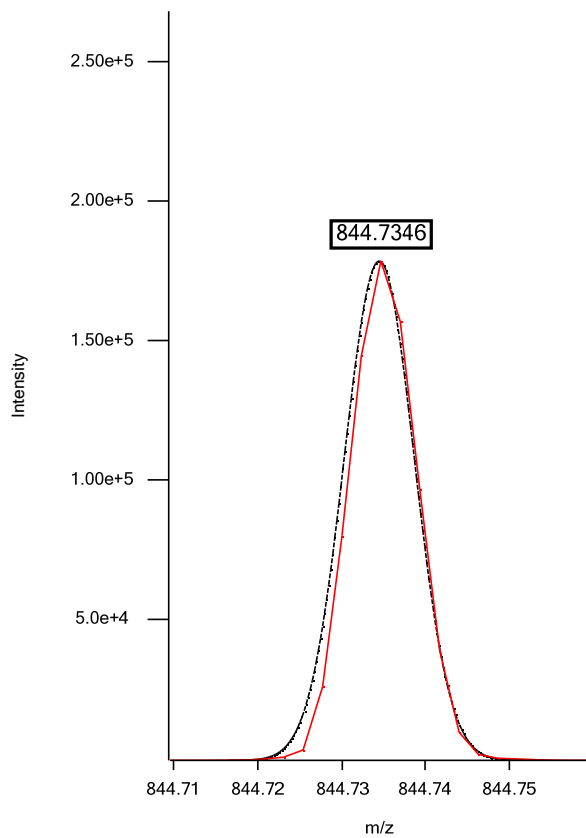

### Isotope 2

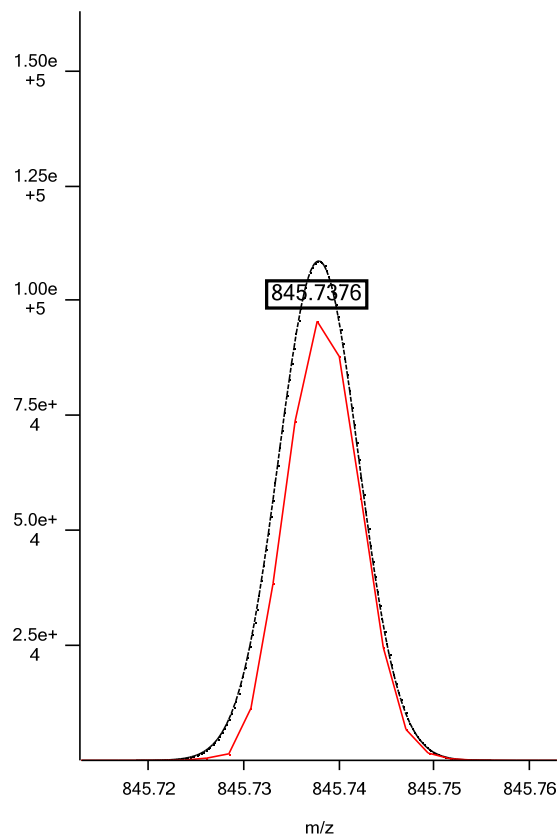

### Isotope 3

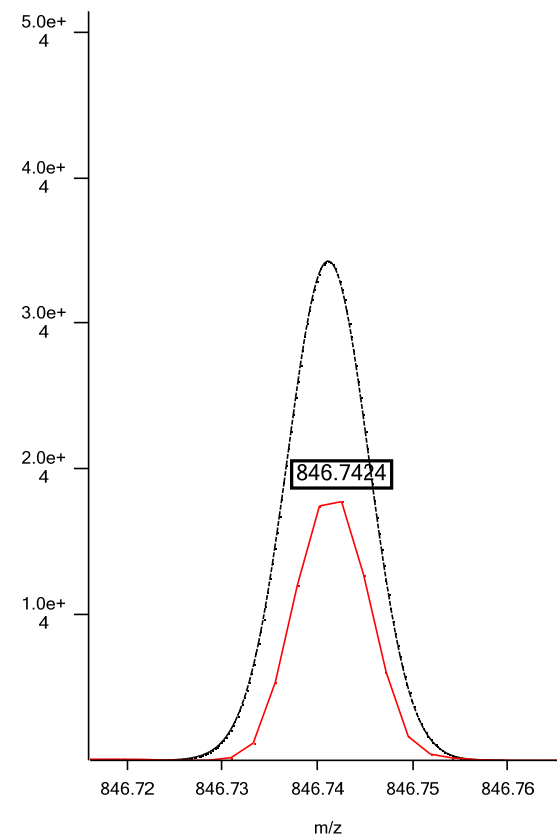

Positive ESI: TAG 51:4; C<sub>54</sub>H<sub>100</sub>NO<sub>6</sub>; theoretical  $m/z$  858.7550, (M+NH<sub>4</sub>)<sup>+</sup>; isotopic fit 0.0338

### Isotope 1

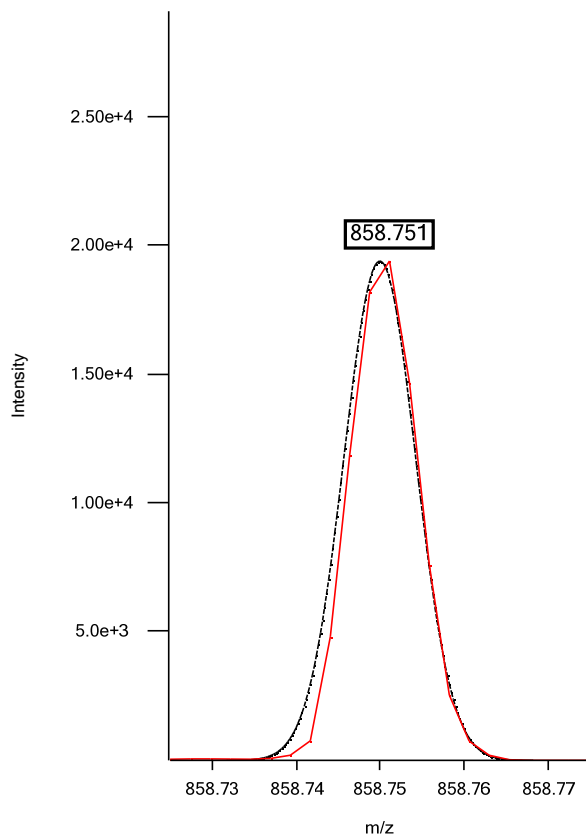

### Isotope 2

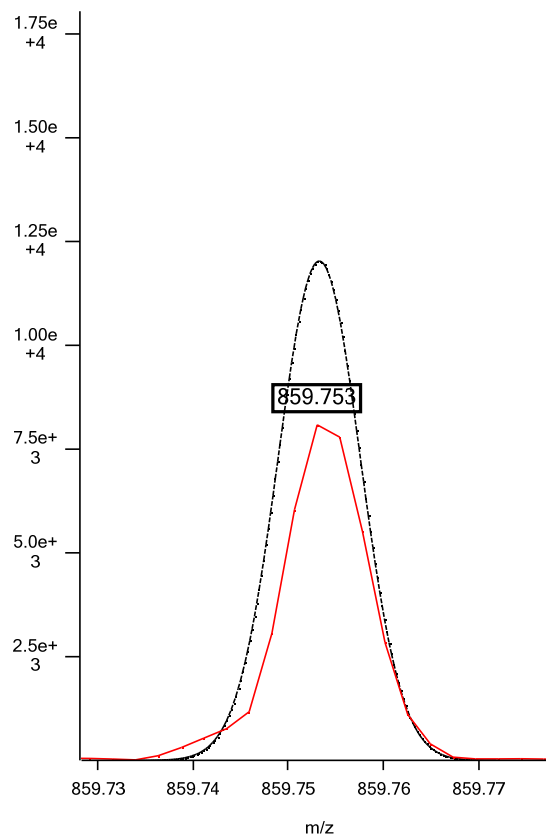

### Isotope 3

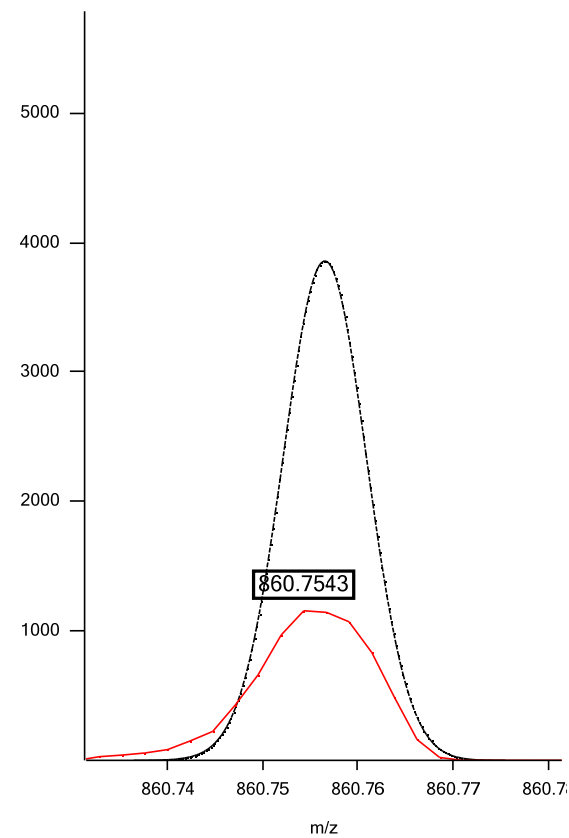

Positive ESI: TAG 51:3; C<sub>54</sub>H<sub>102</sub>NO<sub>6</sub>; theoretical  $m/z$  860.7707, (M+NH<sub>4</sub>)<sup>+</sup>; isotopic fit 0.0096

### Isotope 1

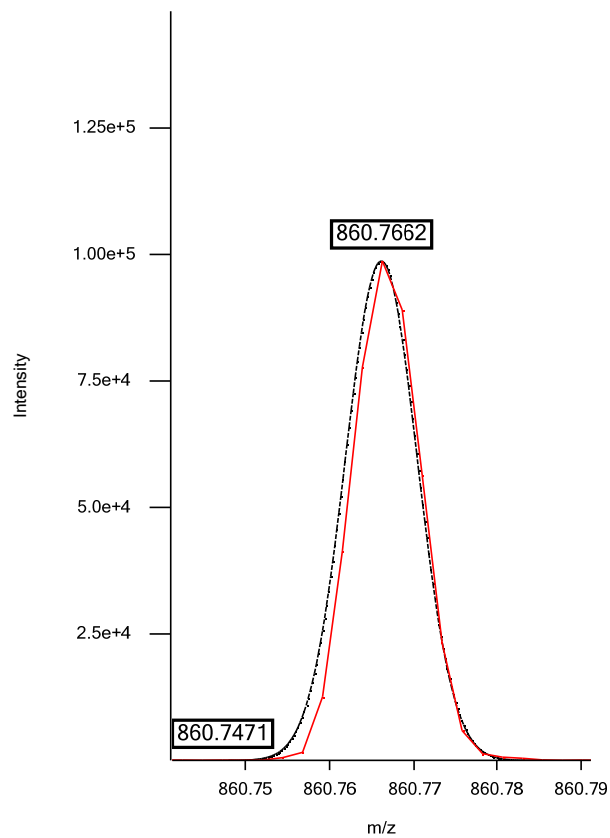

### Isotope 2

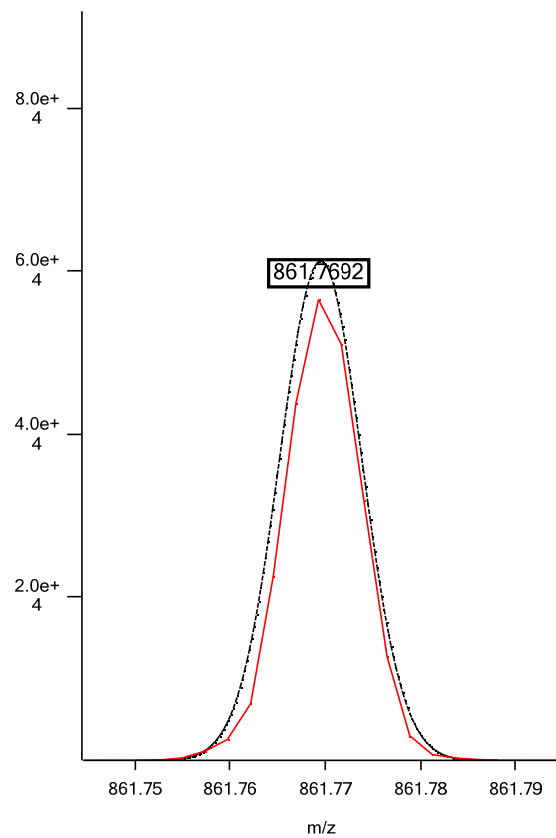

### Isotope 3

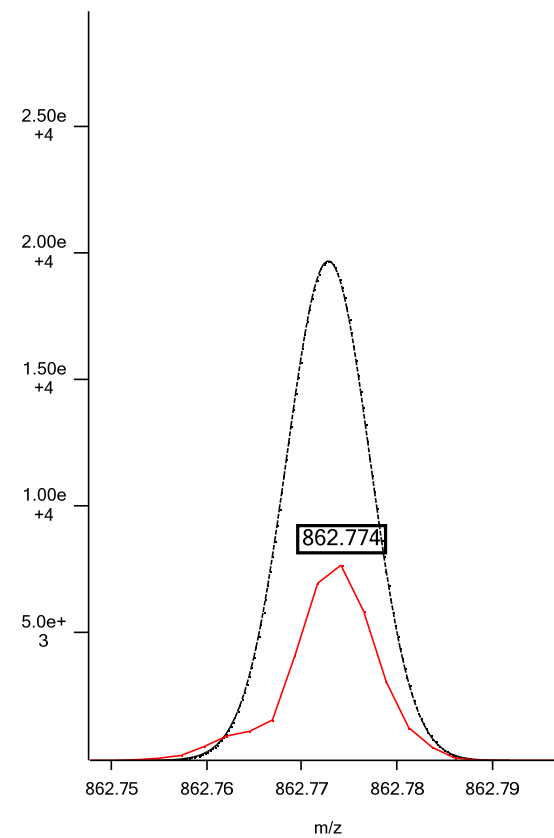



Positive ESI: TAG 51:2; C<sub>54</sub>H<sub>104</sub>NO<sub>6</sub>; theoretical *m/z* 862.7863, (M+NH<sub>4</sub>)<sup>+</sup>; isotopic fit 0.0085

### Isotope 1

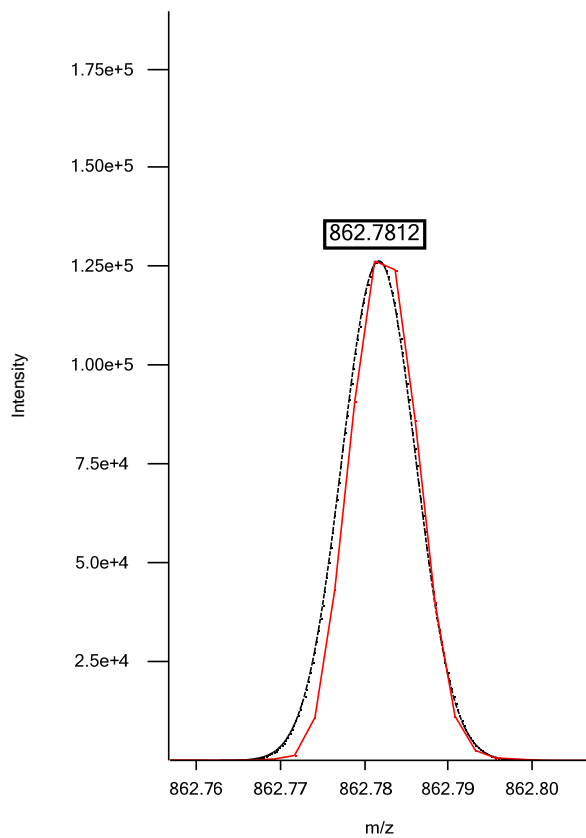

### Isotope 2

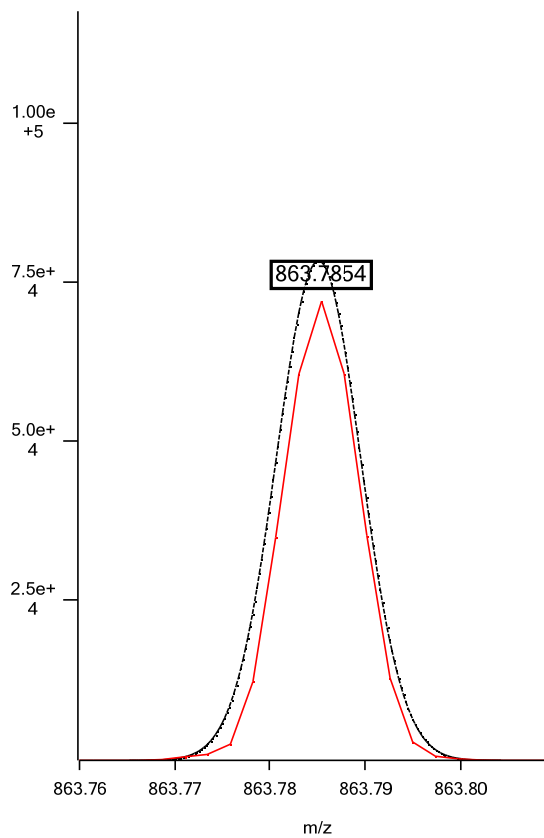

### Isotope 3

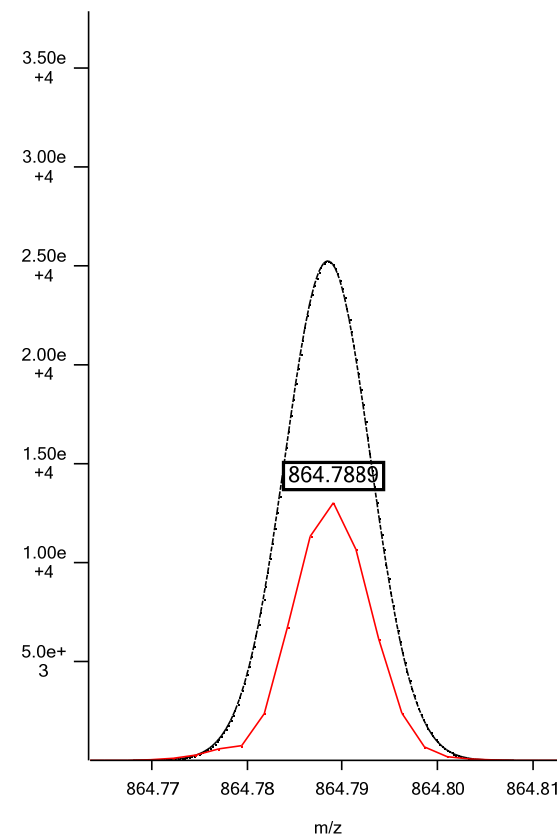

Positive ESI: TAG 51:1; C<sub>54</sub>H<sub>106</sub>NO<sub>6</sub>; theoretical *m/z* 864.8020, (M+NH<sub>4</sub>)<sup>+</sup>; isotopic fit 0.0581

### Isotope 1

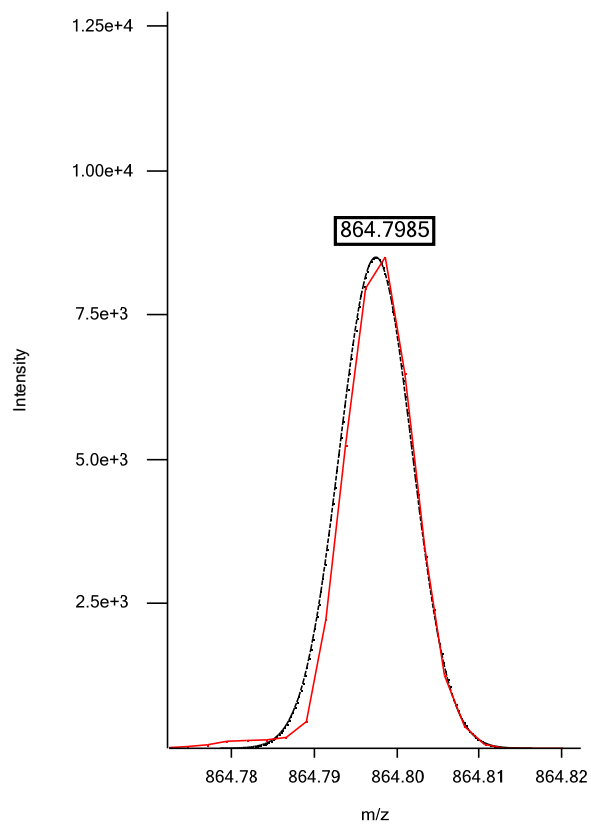

### Isotope 2

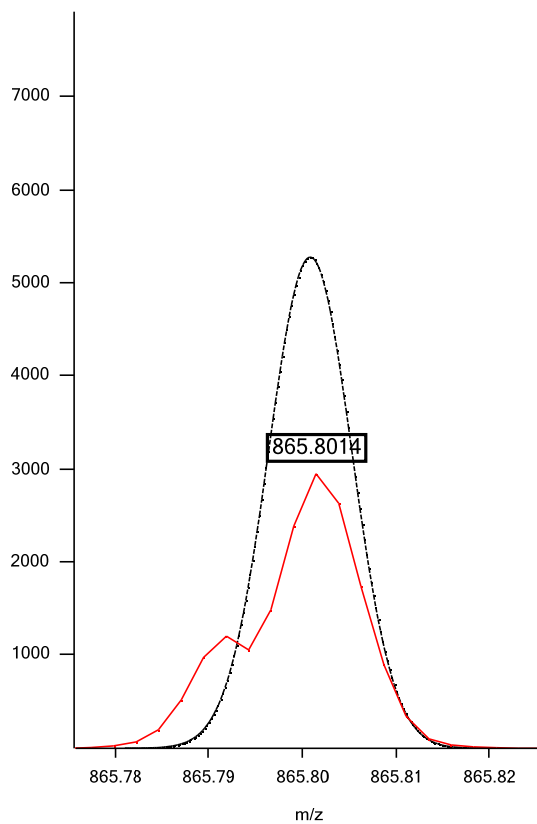

### Isotope 3

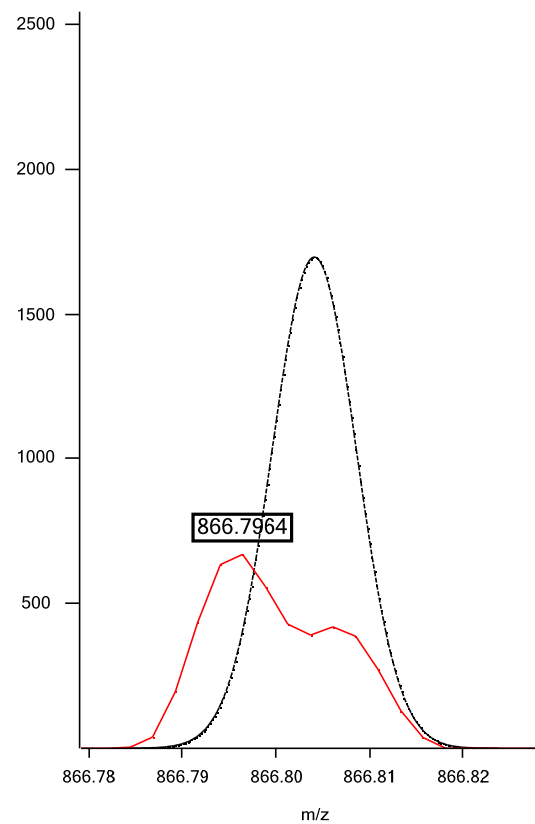

Positive ESI: TAG 51:0; C<sub>54</sub>H<sub>108</sub>NO<sub>6</sub>; theoretical *m/z* 866.8176, (M+NH<sub>4</sub>)<sup>+</sup>; isotopic fit 0.0173

### Isotope 1

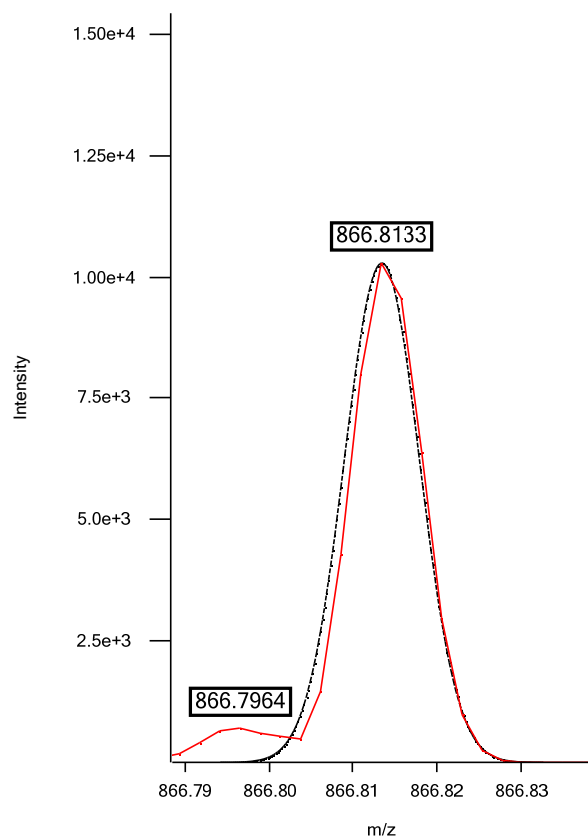

### Isotope 2

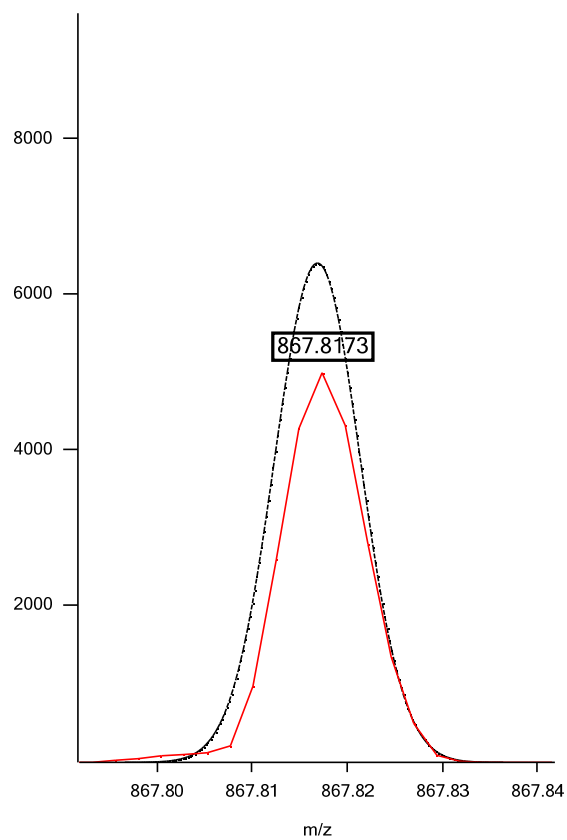

### Isotope 3

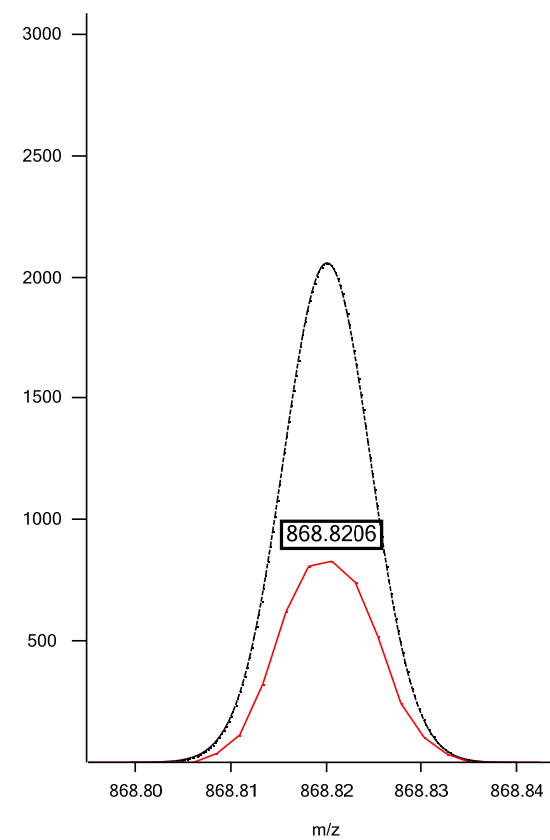

Positive ESI: TAG 52:5; C<sub>55</sub>H<sub>100</sub>NO<sub>6</sub>; theoretical *m/z* 870.7551, (M+NH<sub>4</sub>)<sup>+</sup>; isotopic fit 0.0029

### Isotope 1

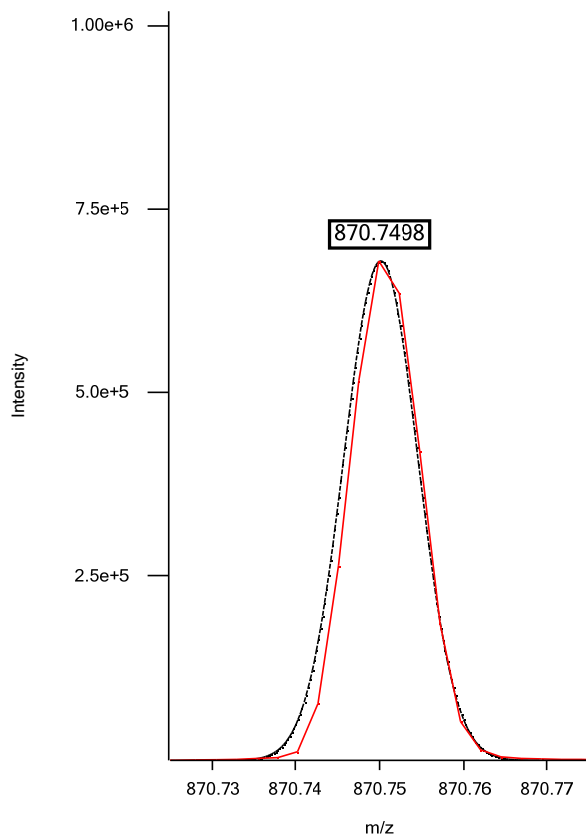

### Isotope 2

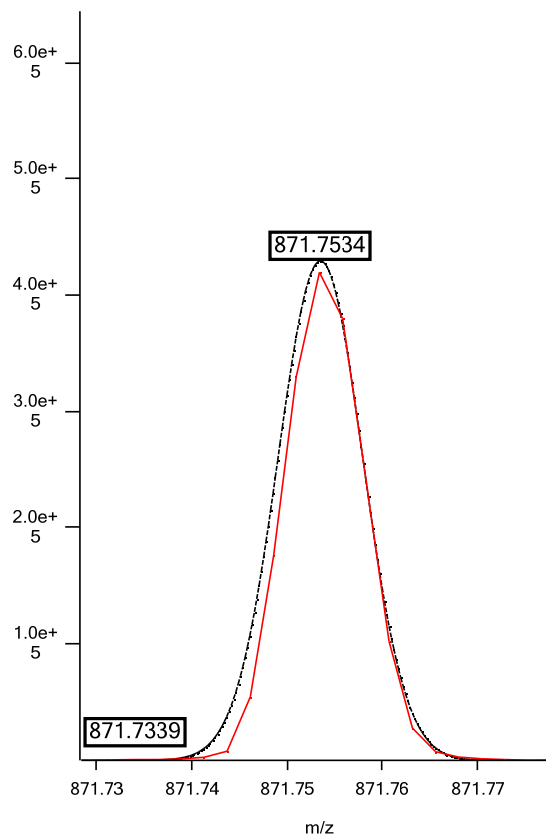

### Isotope 3

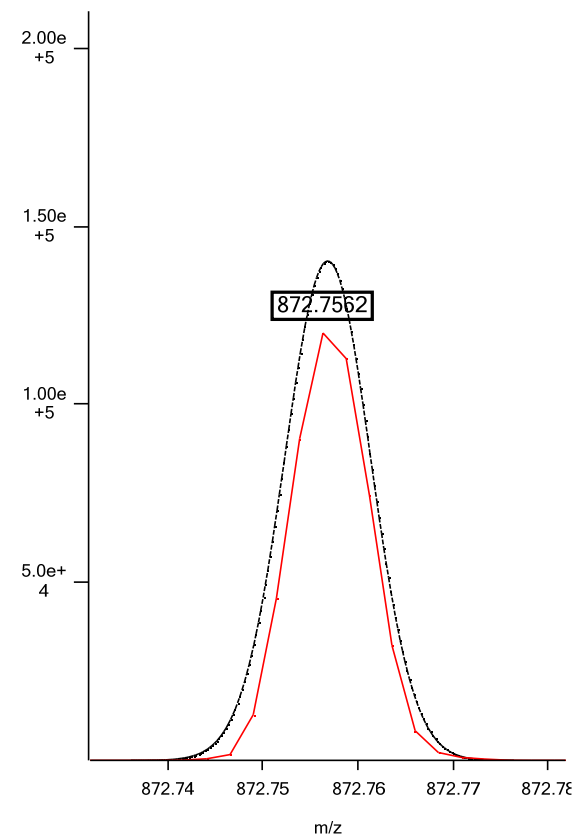

Positive ESI: TAG 52:4; C<sub>55</sub>H<sub>102</sub>NO<sub>6</sub>; theoretical *m/z* 872.7707, (M+NH<sub>4</sub>)<sup>+</sup>; isotopic fit 0.0043

### Isotope 1

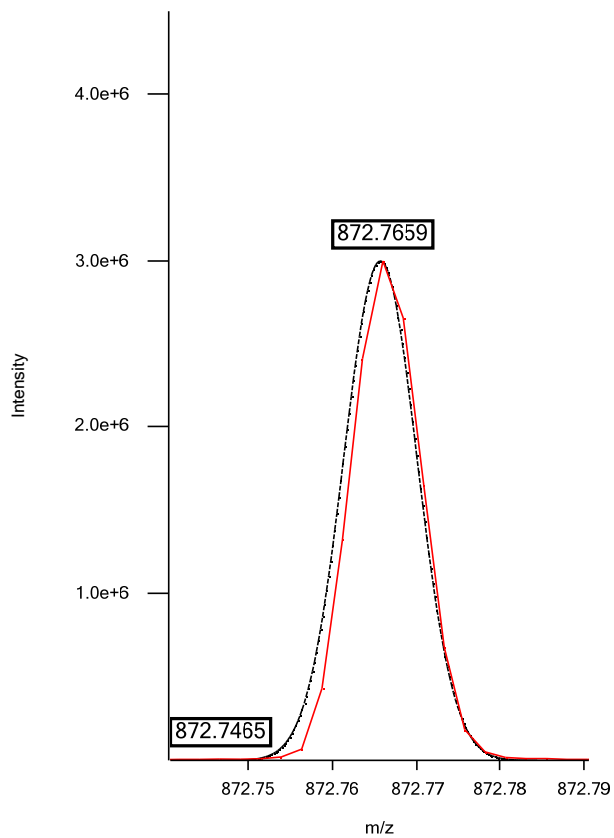

### Isotope 2

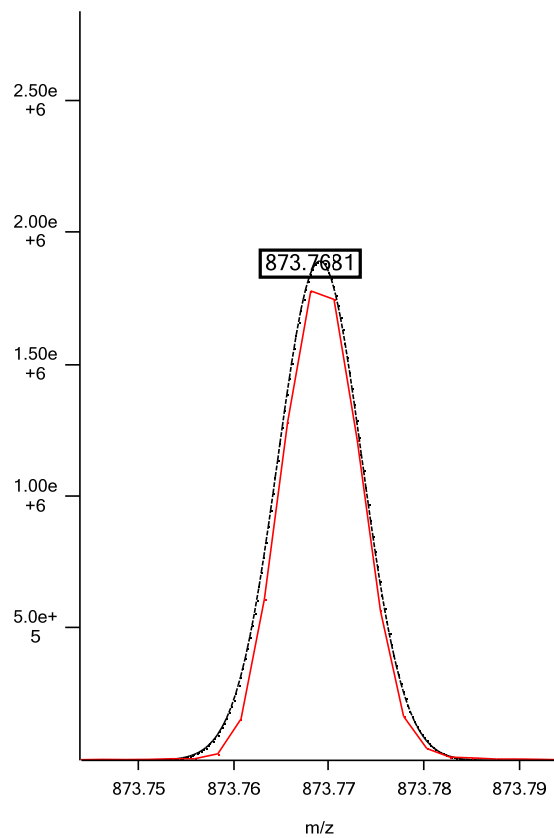

### Isotope 3

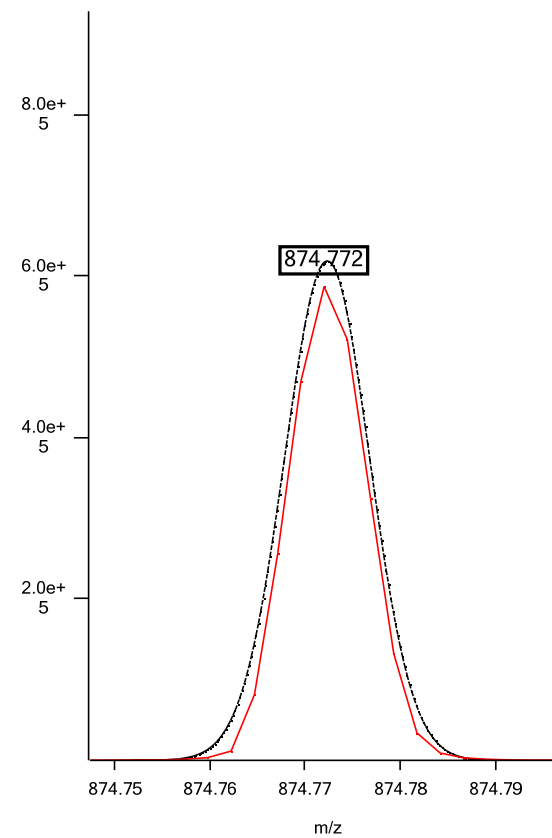

Positive ESI: TAG 52:3; C<sub>55</sub>H<sub>104</sub>NO<sub>6</sub>; theoretical *m/z* 874.7864, (M+NH<sub>4</sub>)<sup>+</sup>; isotopic fit 0.0101

### Isotope 1

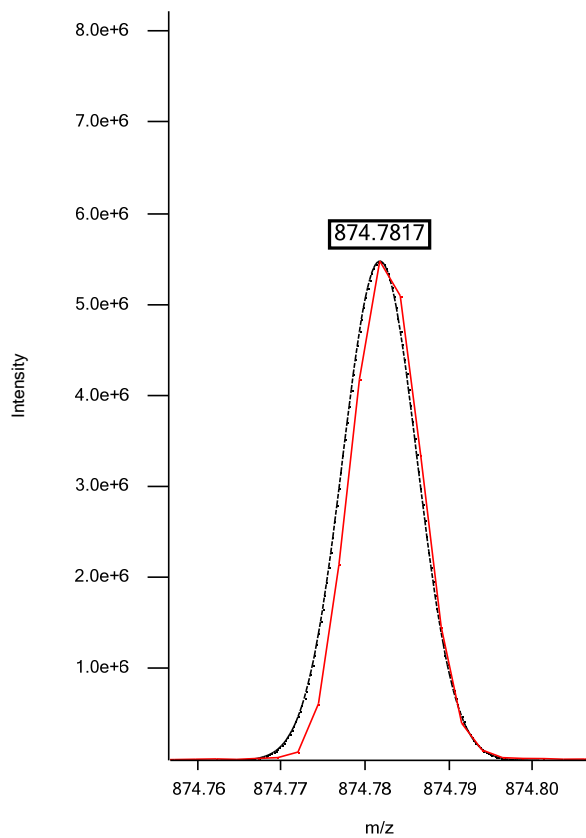

### Isotope 2

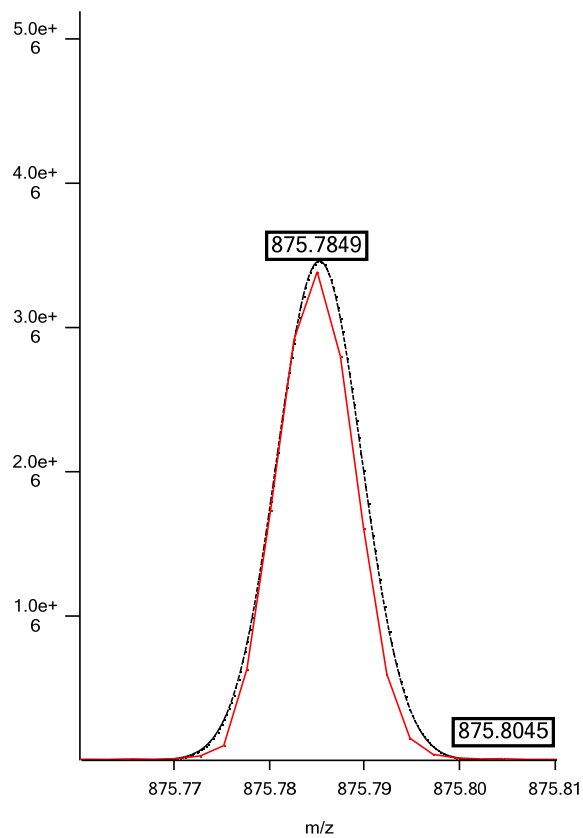

### Isotope 3

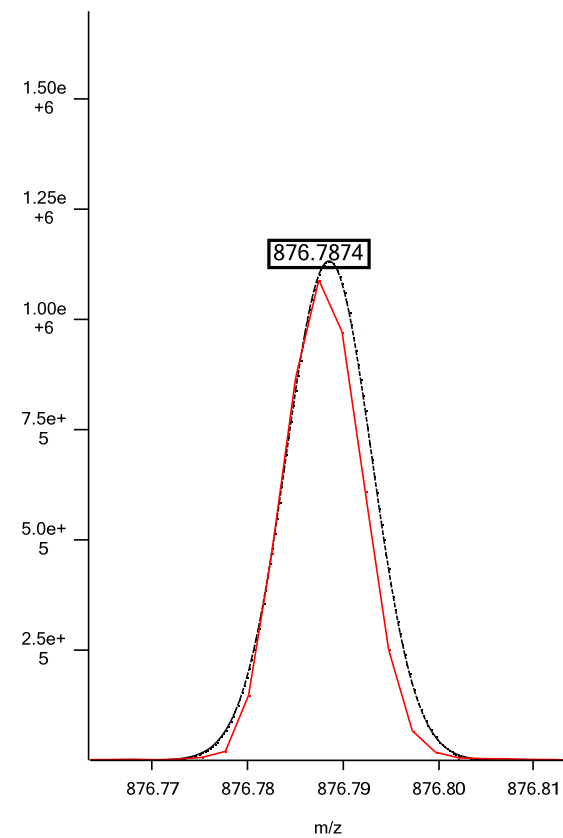

Positive ESI: TAG 52:2; C<sub>55</sub>H<sub>106</sub>NO<sub>6</sub>; theoretical *m/z* 876.8020, (M+NH<sub>4</sub>)<sup>+</sup>; isotopic fit 0.0087

### Isotope 1

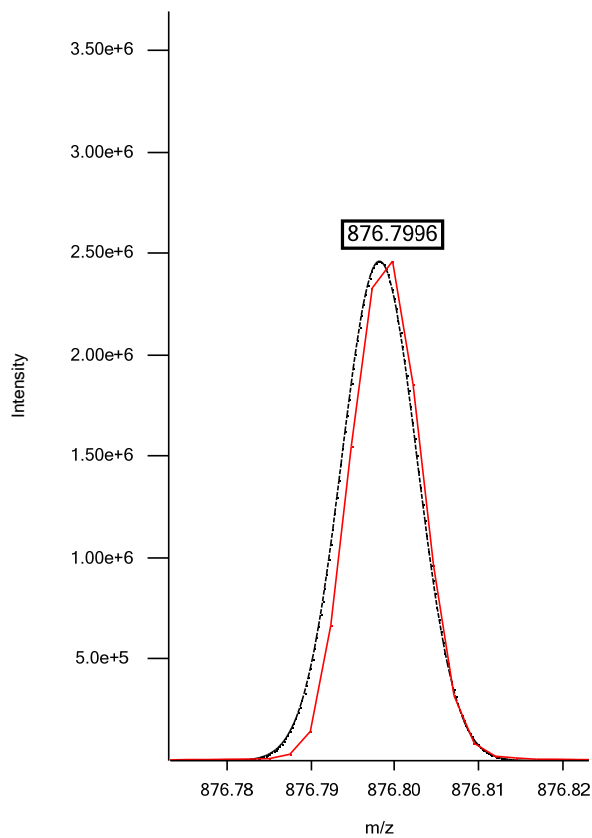

### Isotope 2

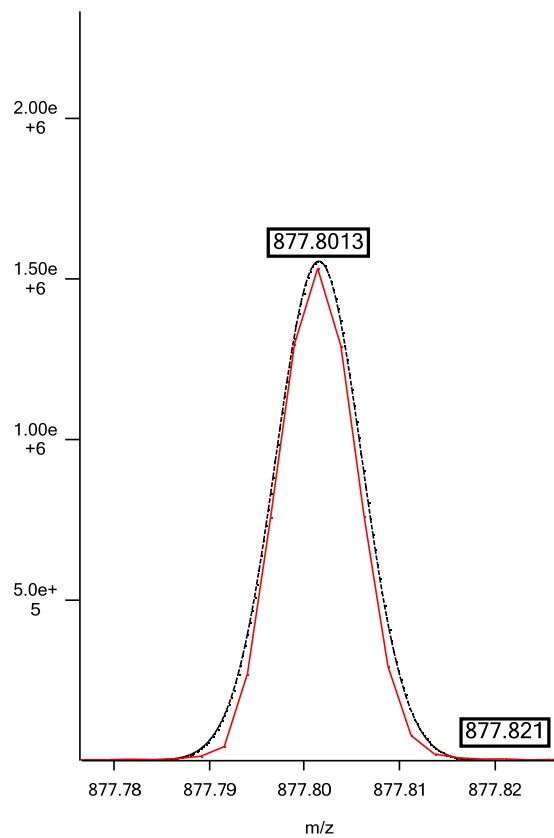

### Isotope 3

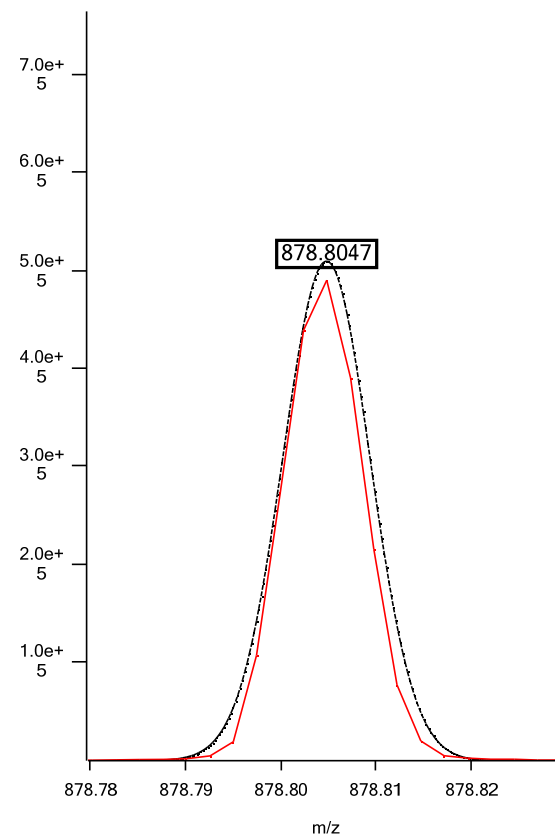

Positive ESI: TAG 52:1; C<sub>55</sub>H<sub>108</sub>NO<sub>6</sub>; theoretical  $m/z$  878.8176, (M+NH<sub>4</sub>)<sup>+</sup>; isotopic fit 0.0080

### Isotope 1

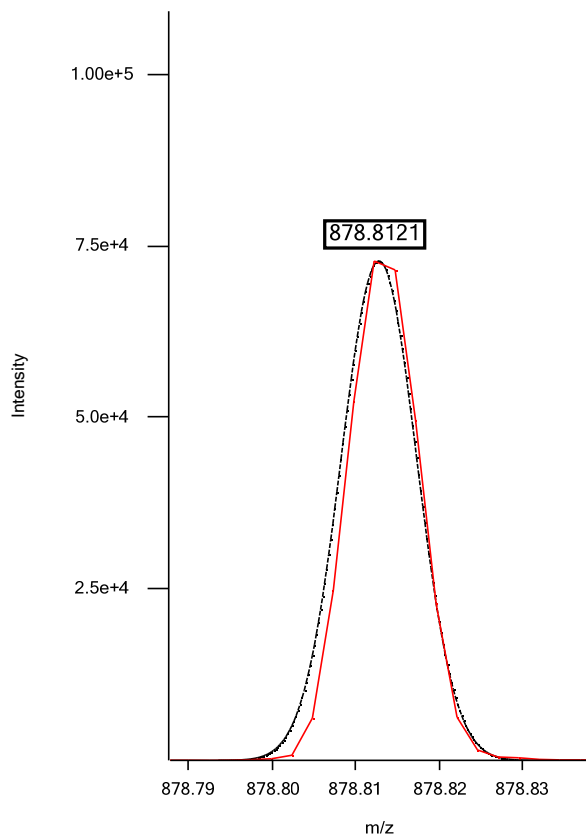

### Isotope 2

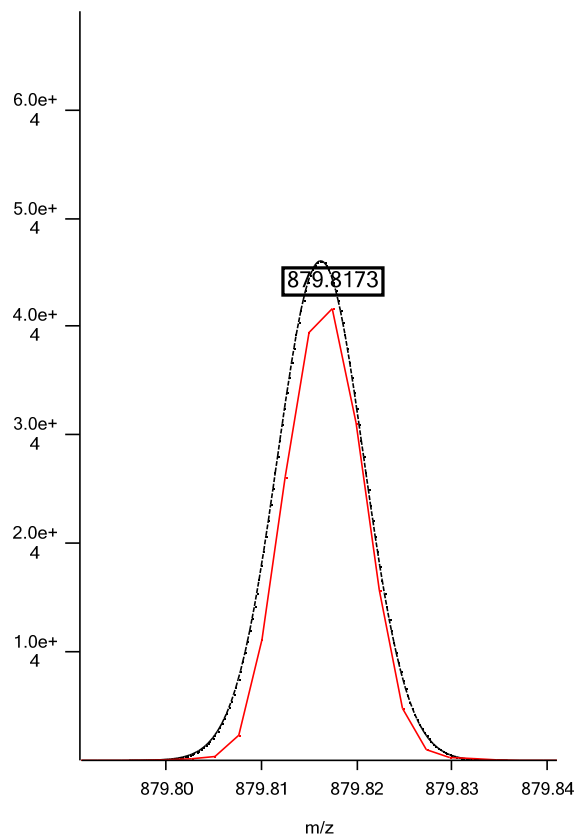

### Isotope 3

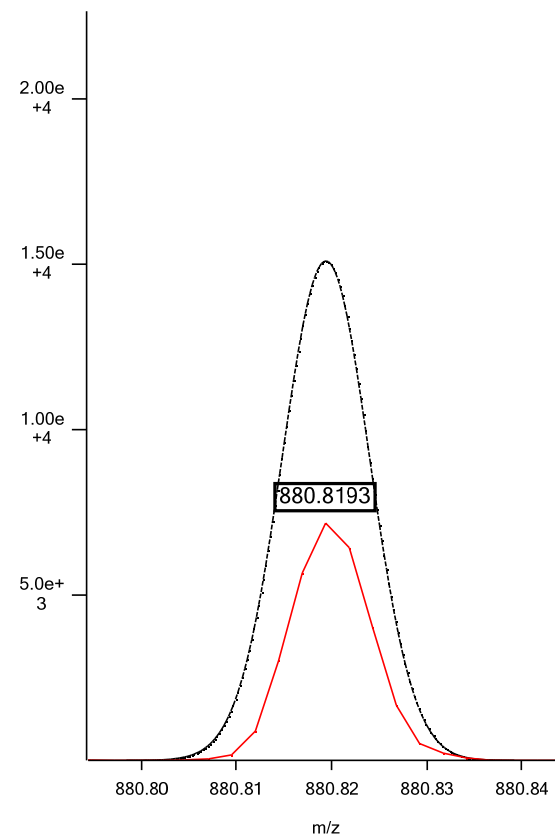



Positive ESI: TAG 52:6; C<sub>55</sub>H<sub>98</sub>NO<sub>6</sub>; theoretical  $m/z$  868.7394, (M+NH<sub>4</sub>)<sup>+</sup>; isotopic fit 0.0281

### Isotope 1

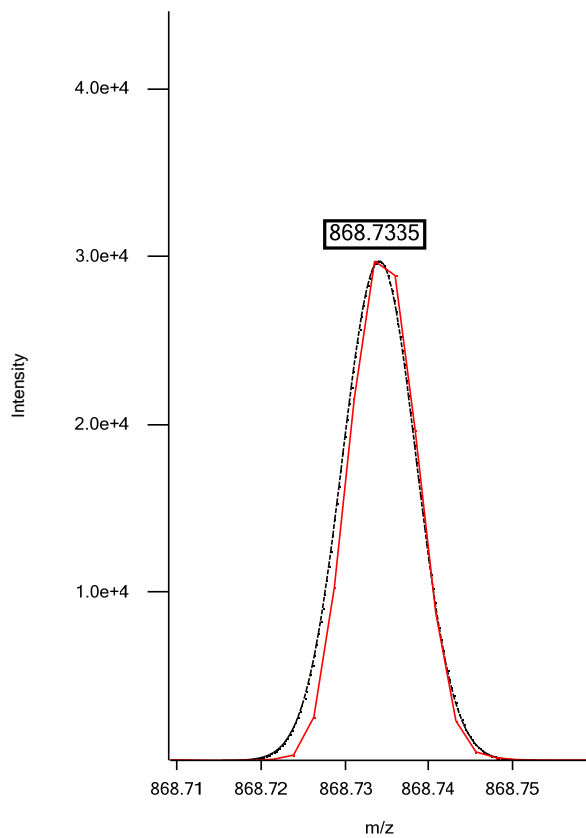

### Isotope 2

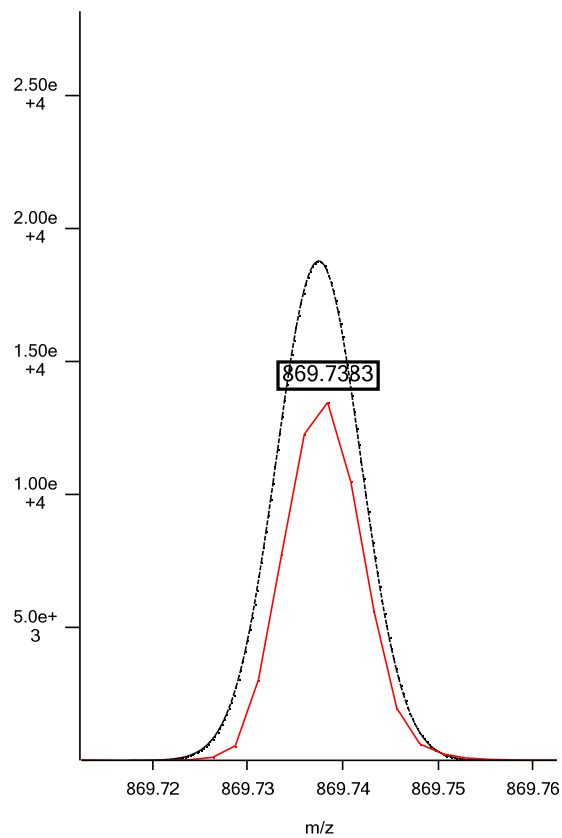

### Isotope 3

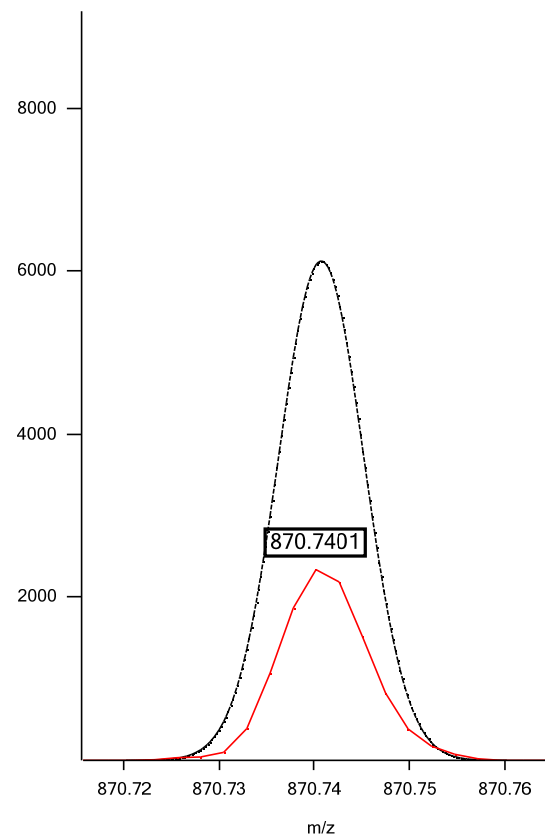

Positive ESI: TAG 53:4; C<sub>56</sub>H<sub>104</sub>NO<sub>6</sub>; theoretical *m/z* 886.7863, (M+NH<sub>4</sub>)<sup>+</sup>; isotopic fit 0.0583

### Isotope 1

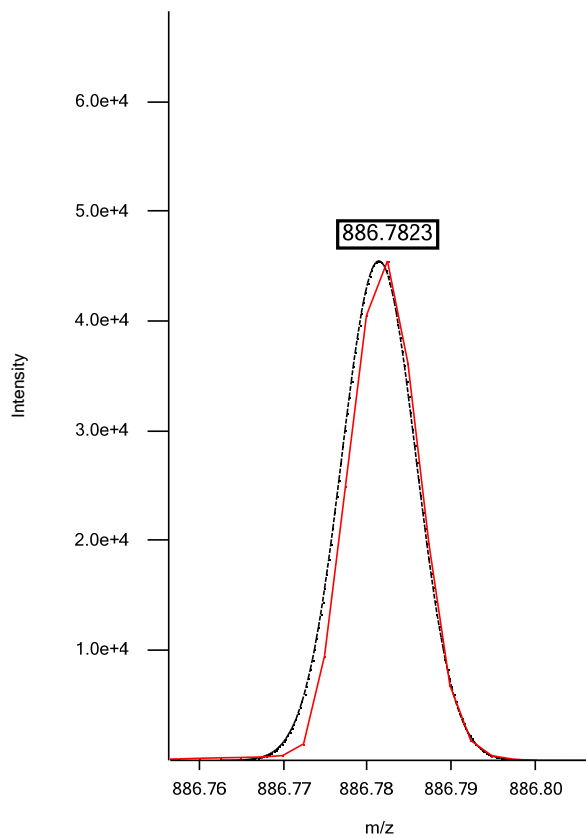

### Isotope 2

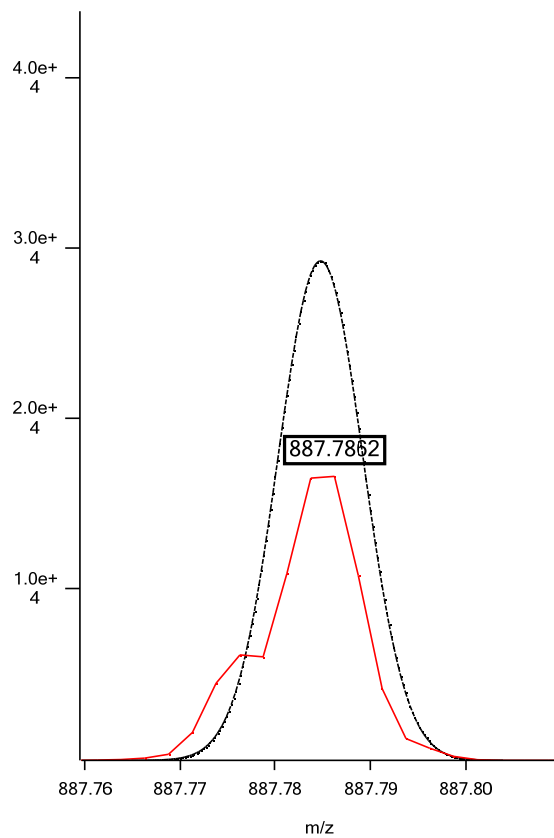

### Isotope 3

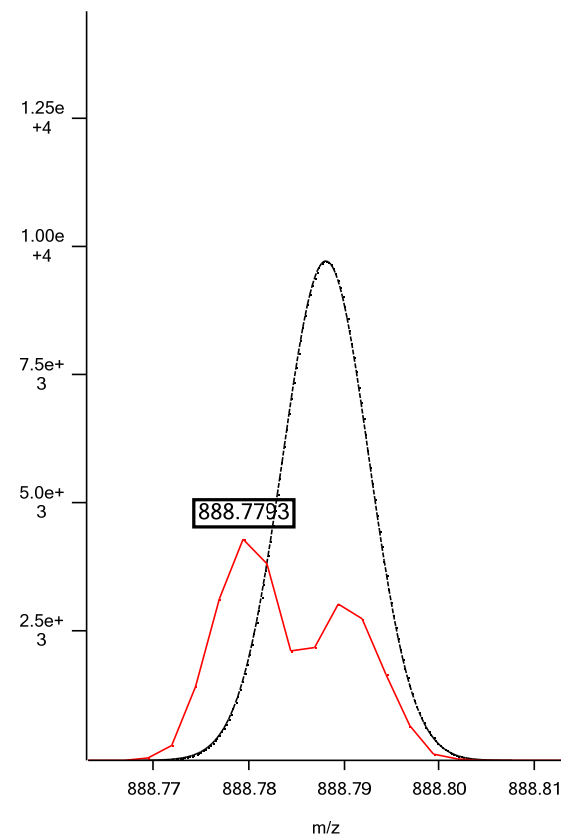

Positive ESI: TAG 53:3; C<sub>56</sub>H<sub>106</sub>NO<sub>6</sub>; theoretical *m/z* 888.8020, (M+NH<sub>4</sub>)<sup>+</sup>; isotopic fit 0.0215

### Isotope 1

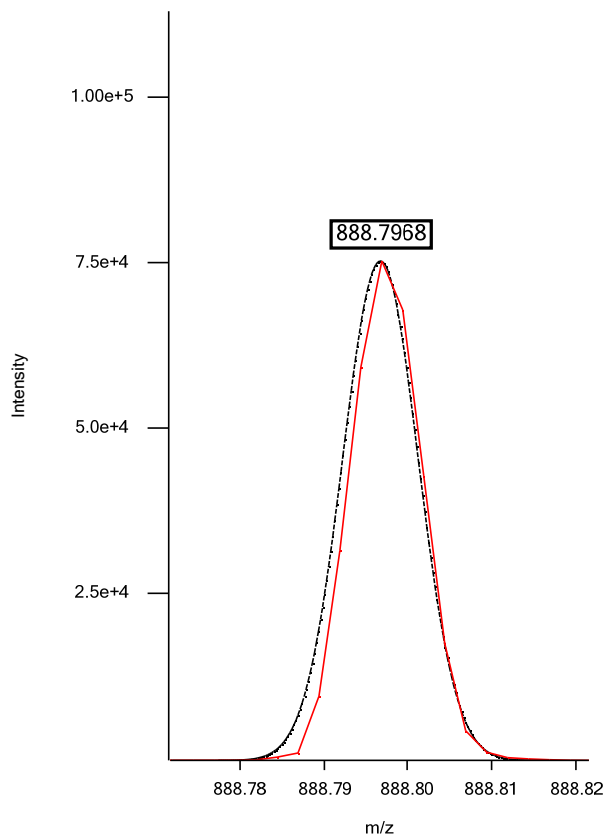

### Isotope 2

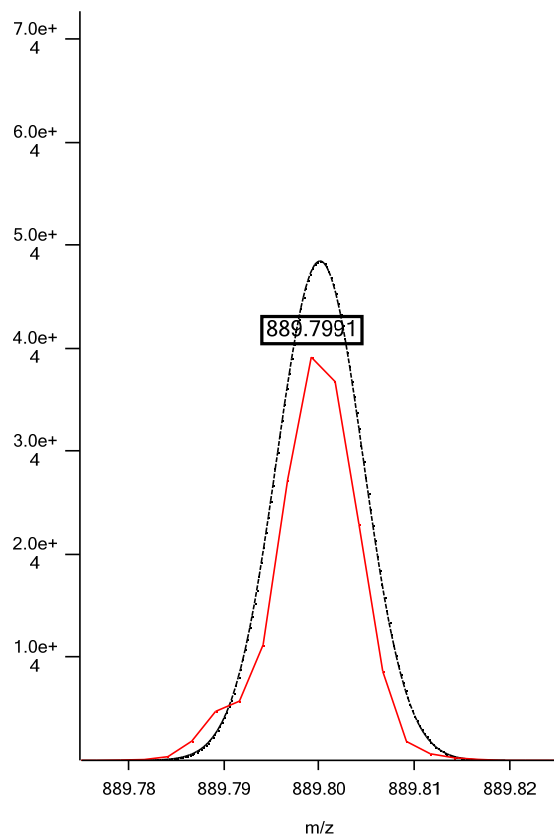

### Isotope 3

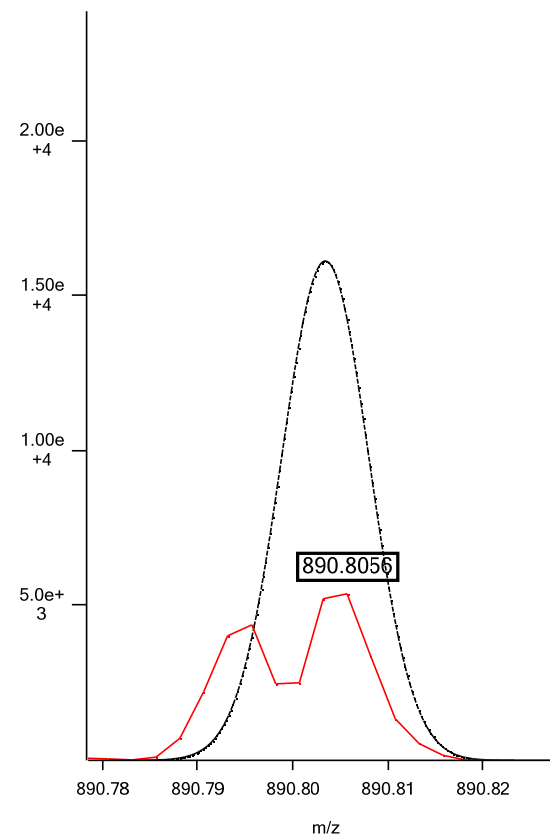

Positive ESI: TAG 53:2;  $C_{56}H_{108}NO_6$ ; theoretical  $m/z$  890.8176,  $(M+NH_4)^+$ ; isotopic fit 0.0328

### Isotope 1

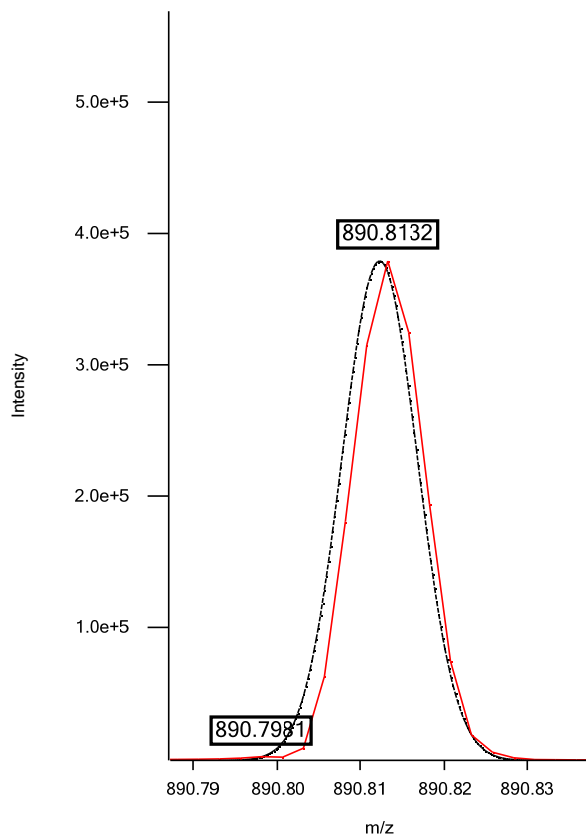

### Isotope 2

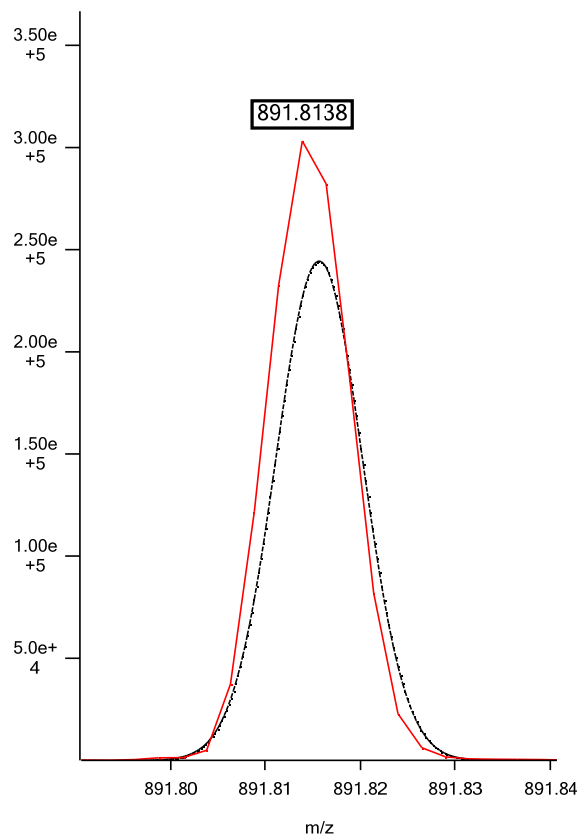

### Isotope 3

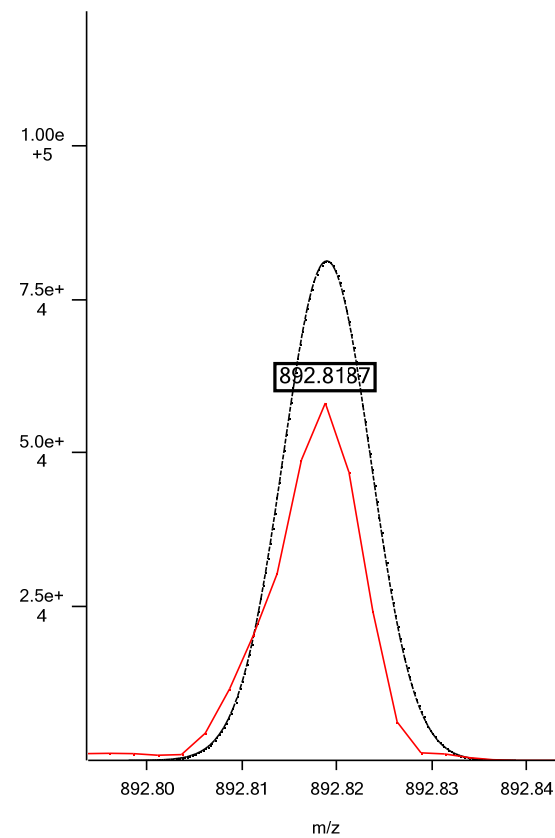

Positive ESI: TAG 54:7; C<sub>57</sub>H<sub>100</sub>NO<sub>6</sub>; theoretical *m/z* 894.7551, (M+NH<sub>4</sub>)<sup>+</sup>; isotopic fit 0.0224

### Isotope 1

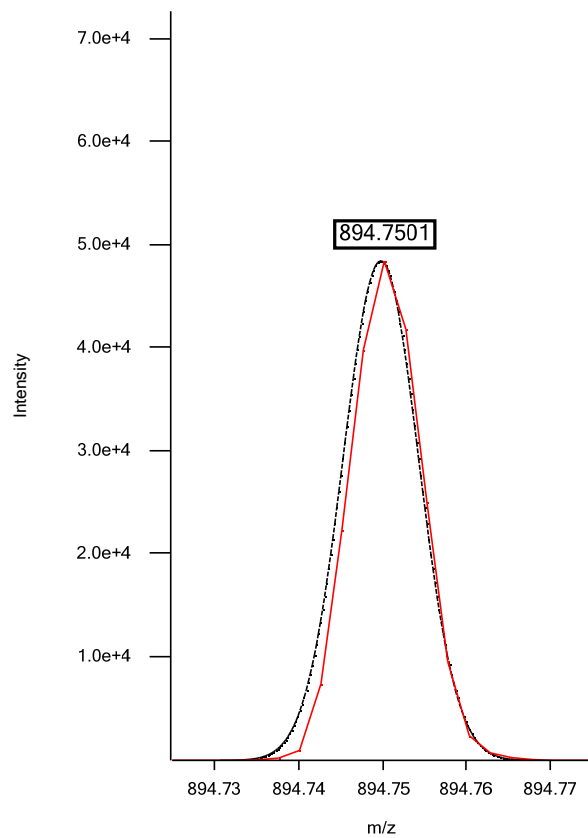

### Isotope 2

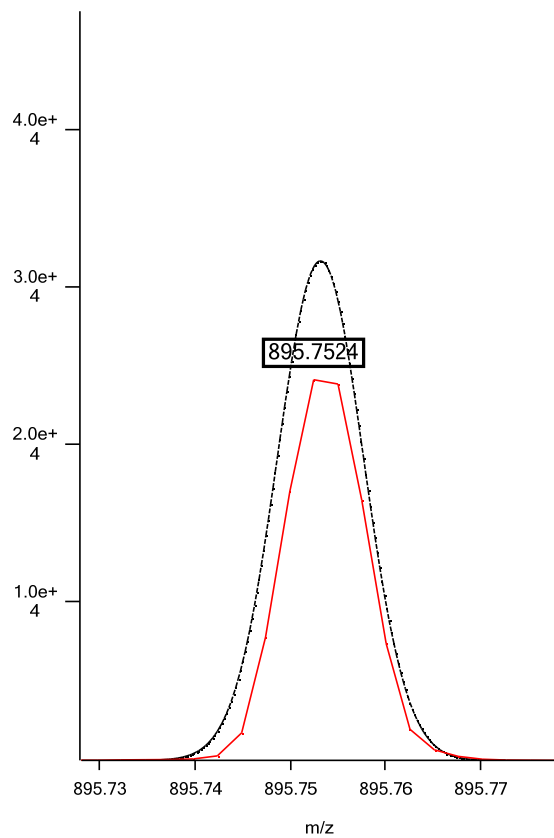

### Isotope 3

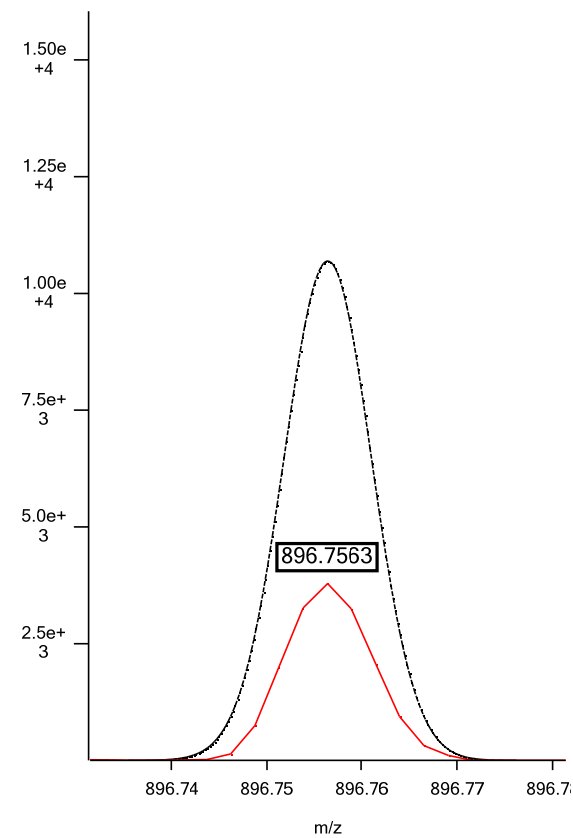

Positive ESI: TAG 54:6;  $C_{57}H_{102}NO_6$ ; theoretical  $m/z$  896.7707,  $(M+NH_4)^+$ ; isotopic fit 0.0058

### Isotope 1

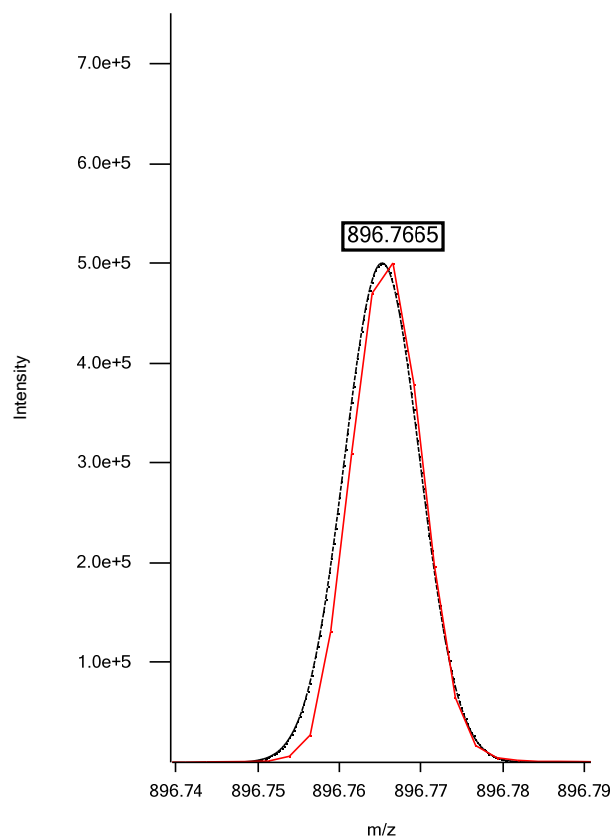

### Isotope 2

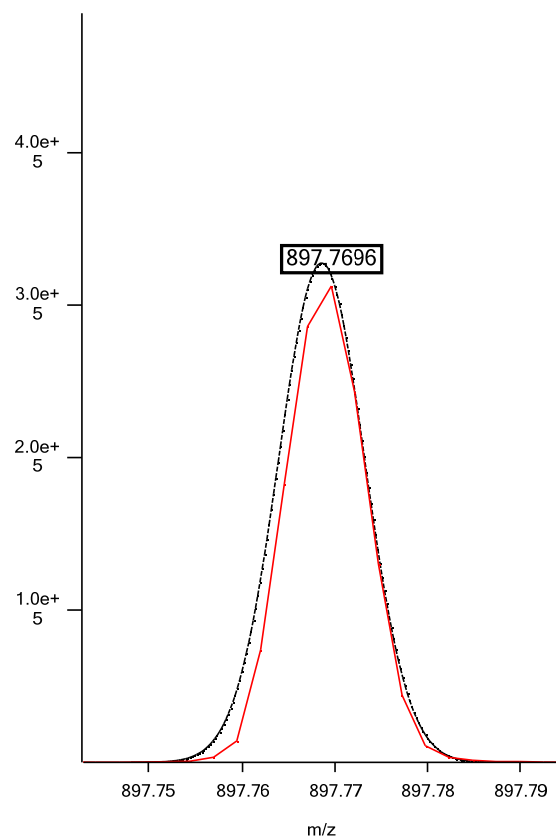

### Isotope 3

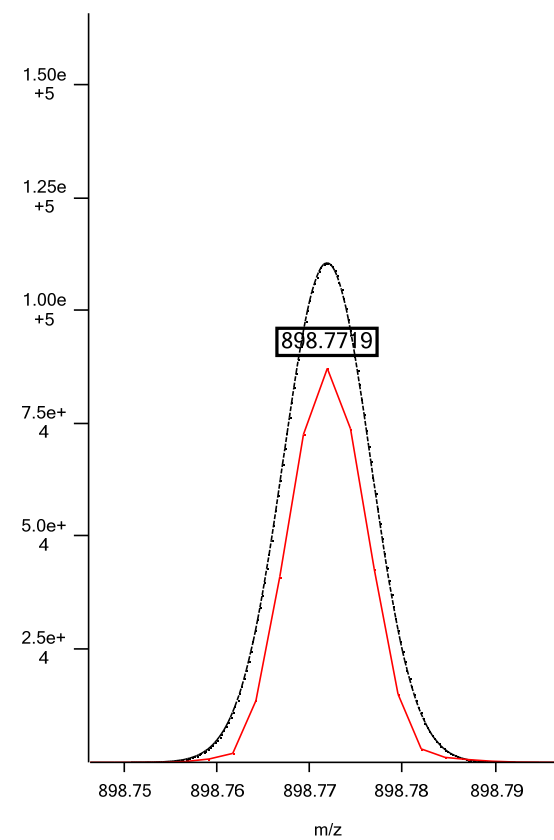

Positive ESI: TAG 54:5; C<sub>57</sub>H<sub>104</sub>NO<sub>6</sub>; theoretical *m/z* 898.7864, (M+NH<sub>4</sub>)<sup>+</sup>; isotopic fit 0.0038

### Isotope 1

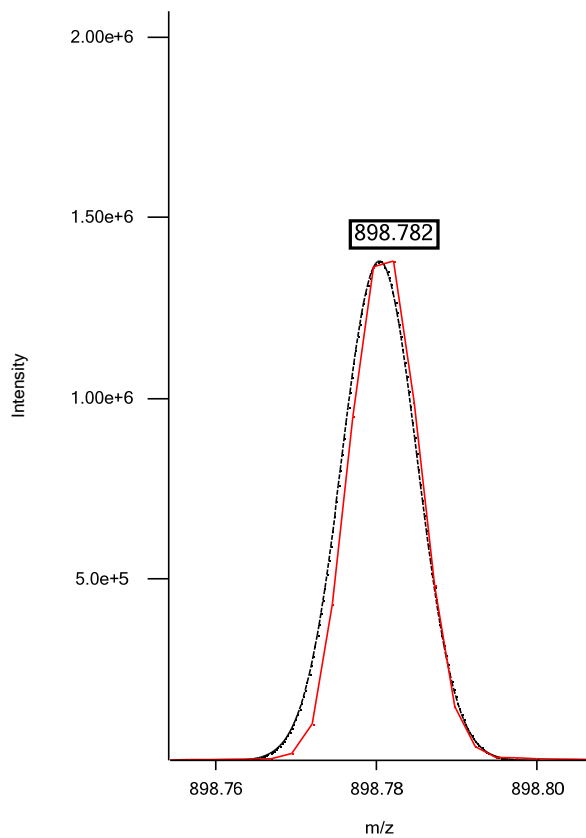

### Isotope 2

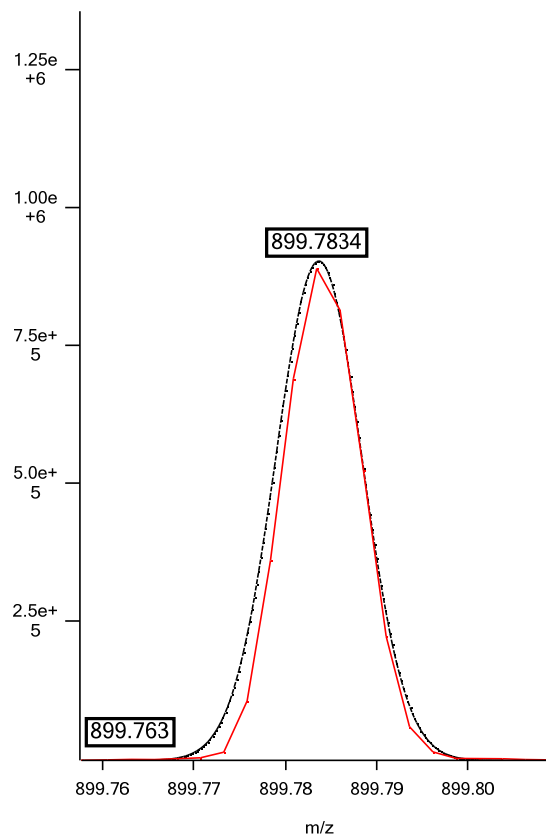

### Isotope 3

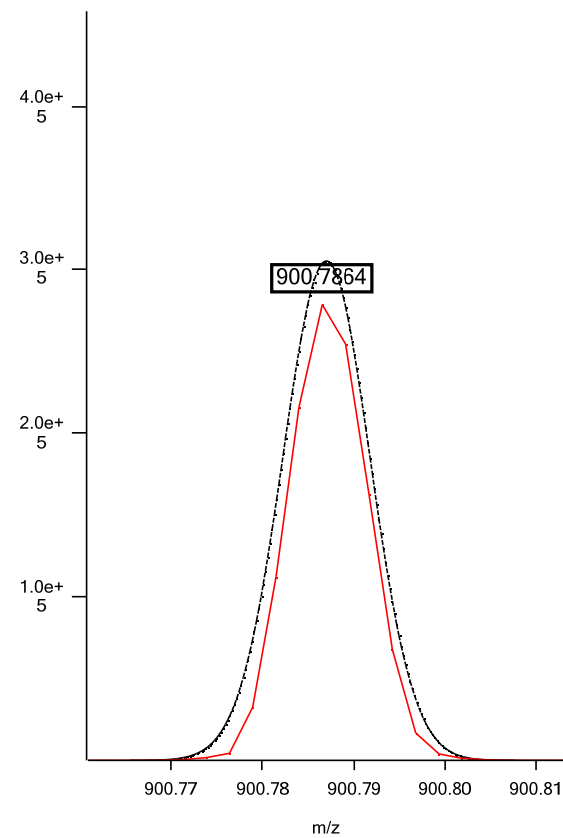

Positive ESI: TAG 54:4; C<sub>57</sub>H<sub>106</sub>NO<sub>6</sub>; theoretical *m/z* 900.8020, (M+NH<sub>4</sub>)<sup>+</sup>; isotopic fit 0.0035

### Isotope 1

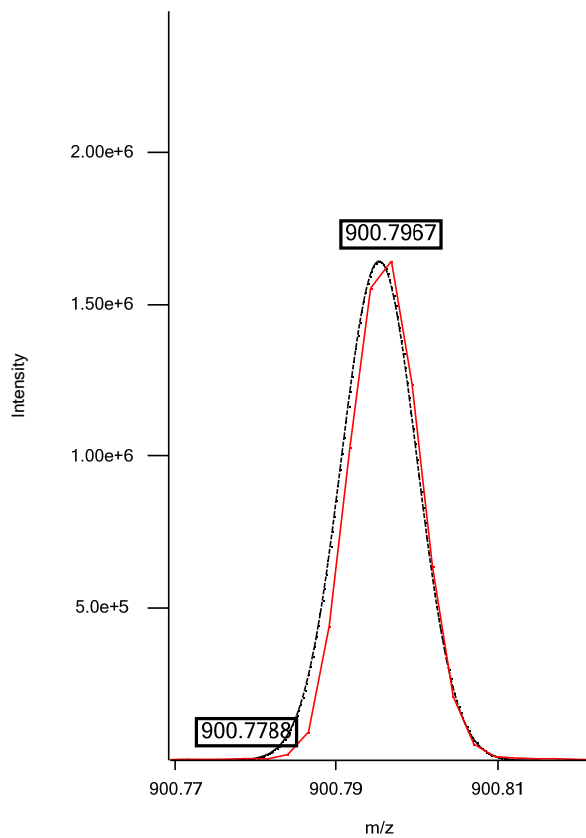

### Isotope 2

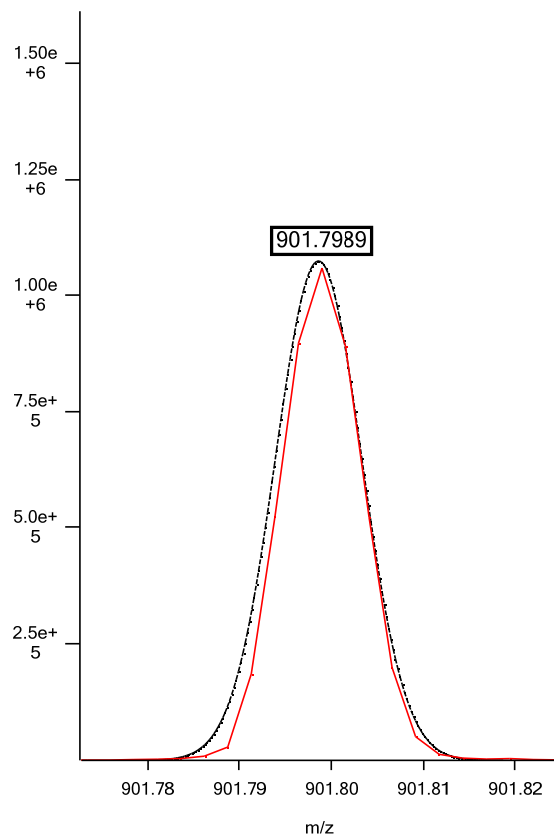

### Isotope 3

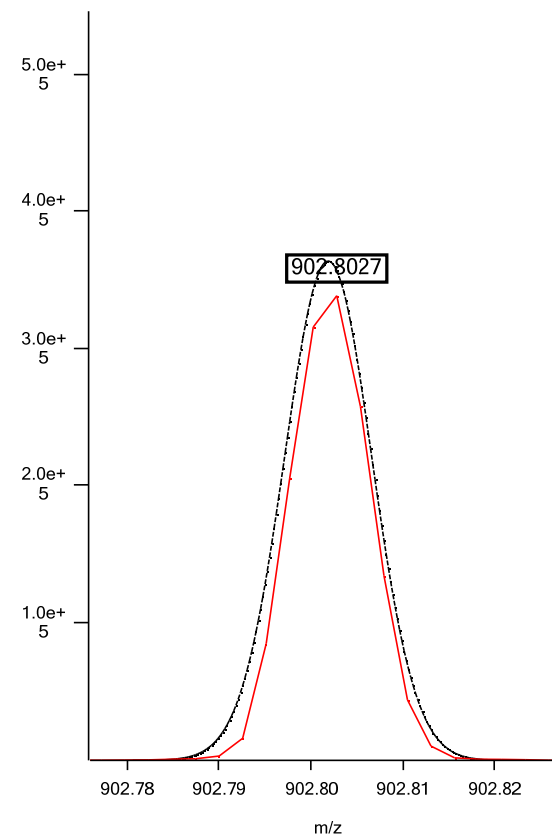



Positive ESI: TAG 54:3; C<sub>57</sub>H<sub>108</sub>NO<sub>6</sub>; theoretical *m/z* 902.8177, (M+NH<sub>4</sub>)<sup>+</sup>; isotopic fit 0.0025

### Isotope 1

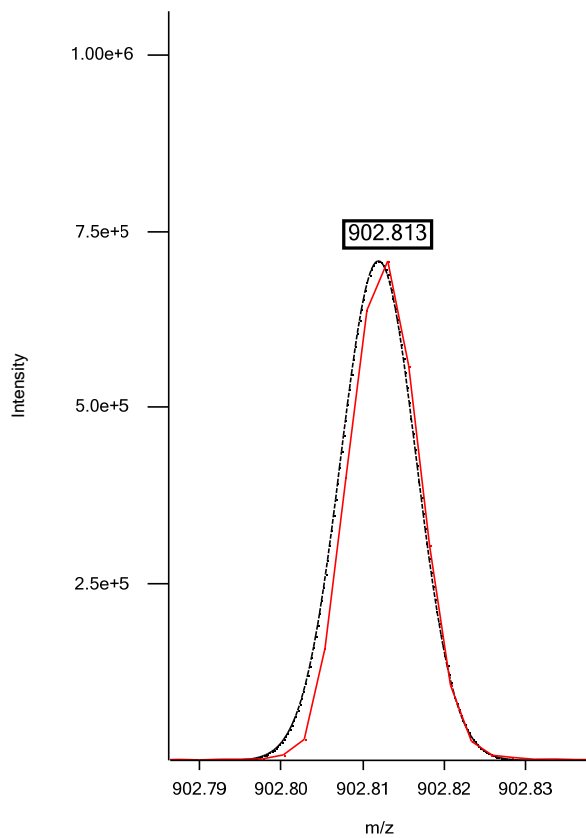

### Isotope 2

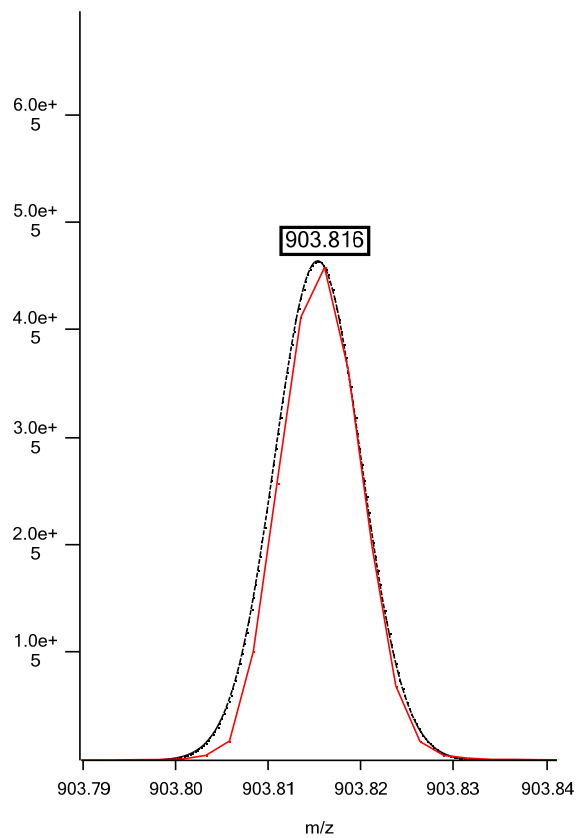

### Isotope 3

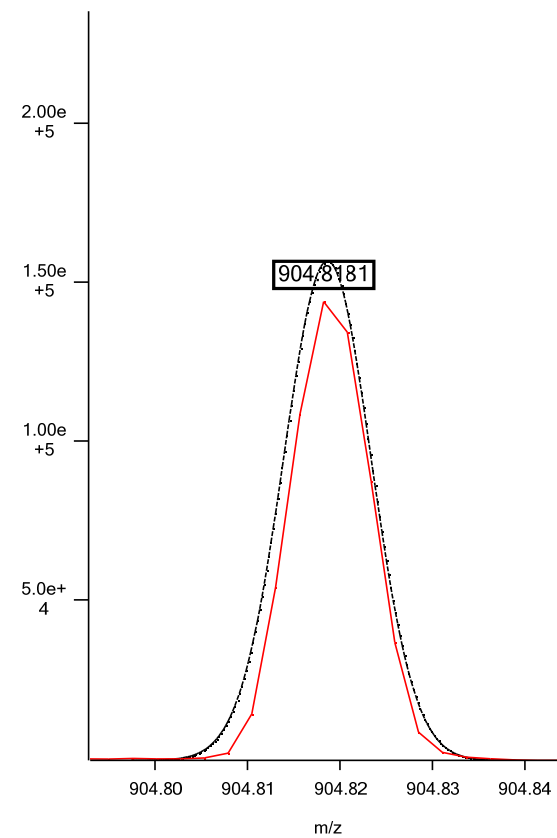

Positive ESI: TAG 54:2; C<sub>57</sub>H<sub>110</sub>NO<sub>6</sub>; theoretical  $m/z$  904.8333, (M+NH<sub>4</sub>)<sup>+</sup>; isotopic fit 0.0075

### Isotope 1

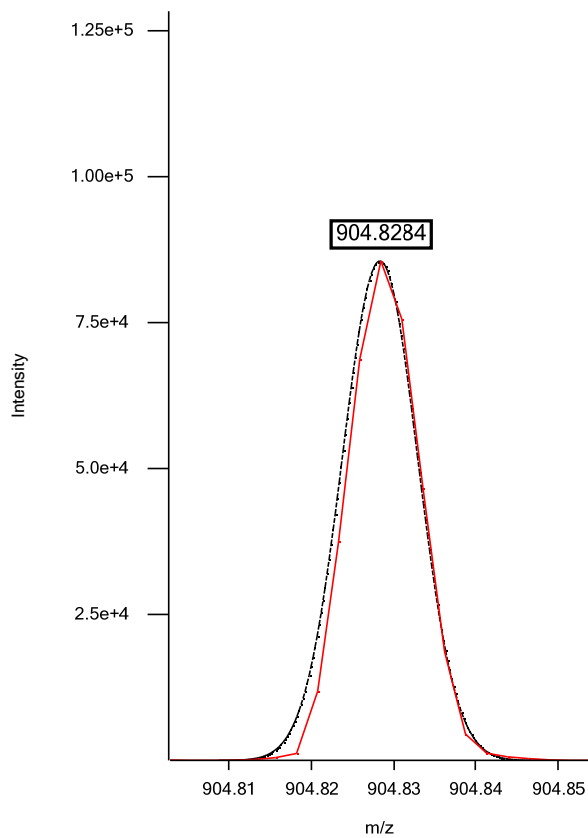

### Isotope 2

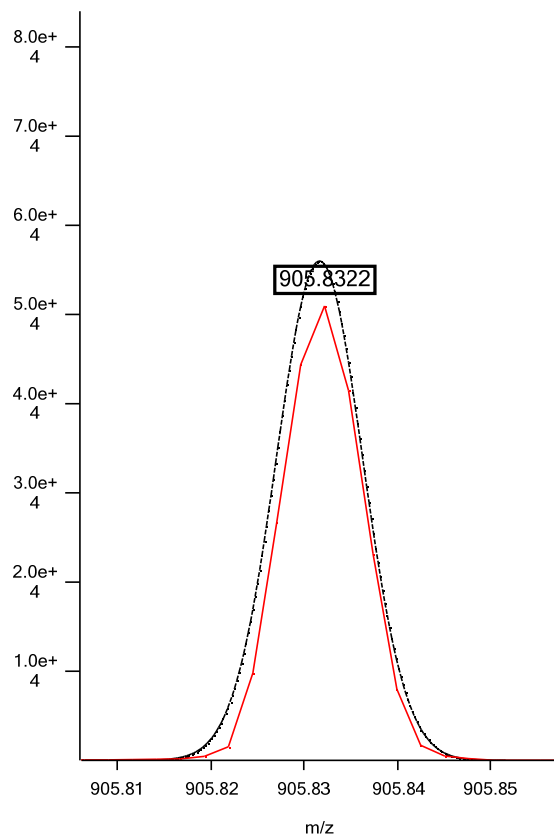

### Isotope 3

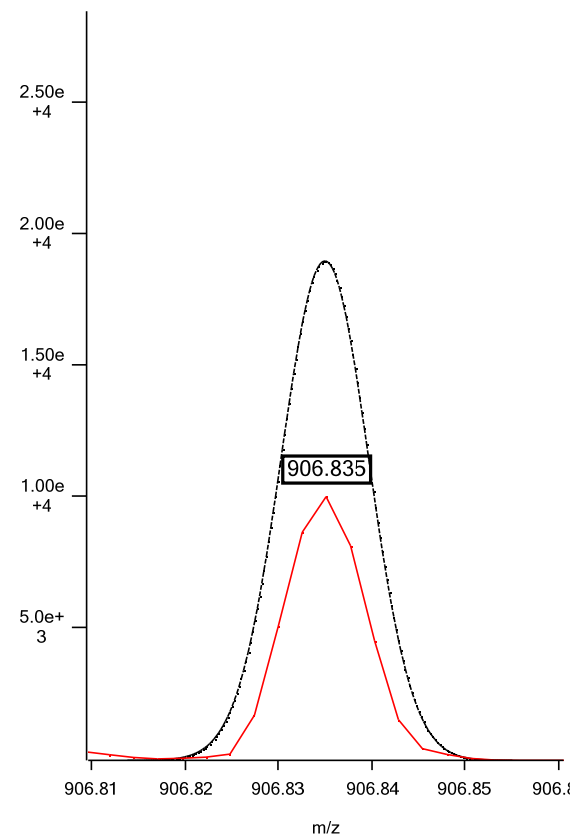

Positive ESI: TAG 54:1; C<sub>57</sub>H<sub>112</sub>NO<sub>6</sub>; theoretical *m/z* 906.8489, (M+NH<sub>4</sub>)<sup>+</sup>; isotopic fit 0.0238

### Isotope 1

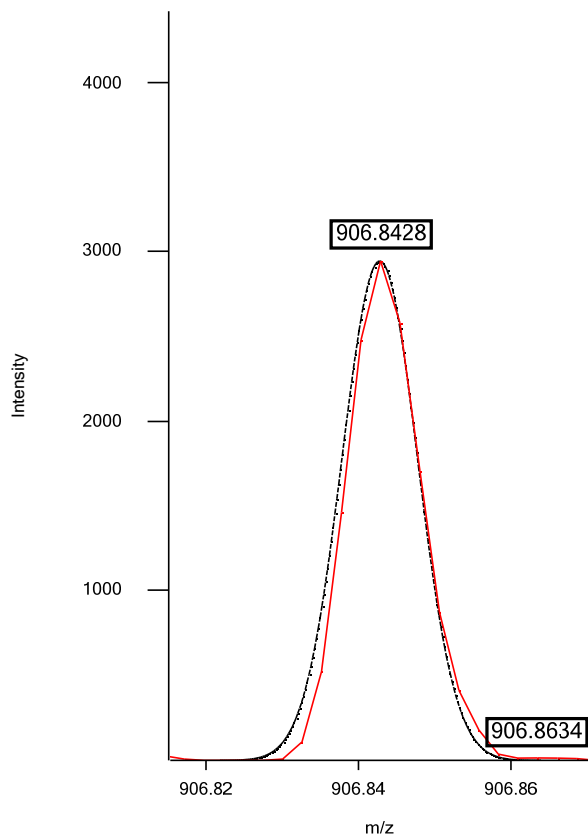

### Isotope 2

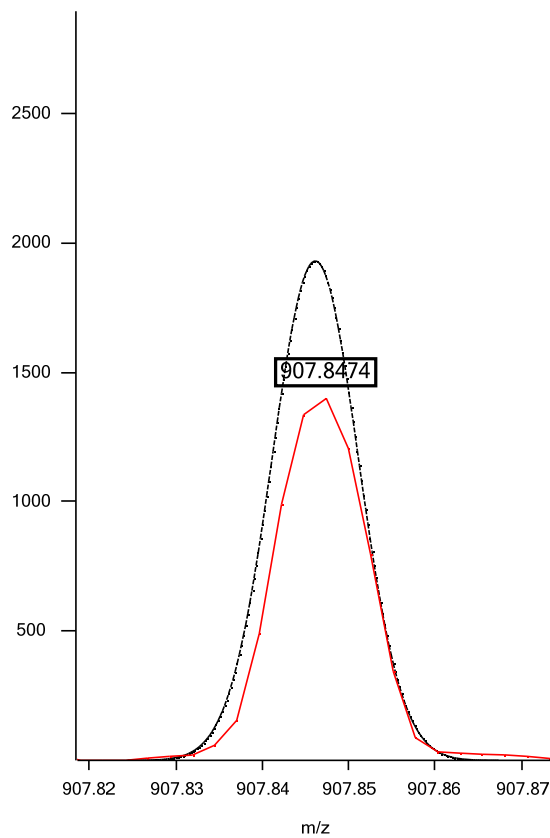

### Isotope 3

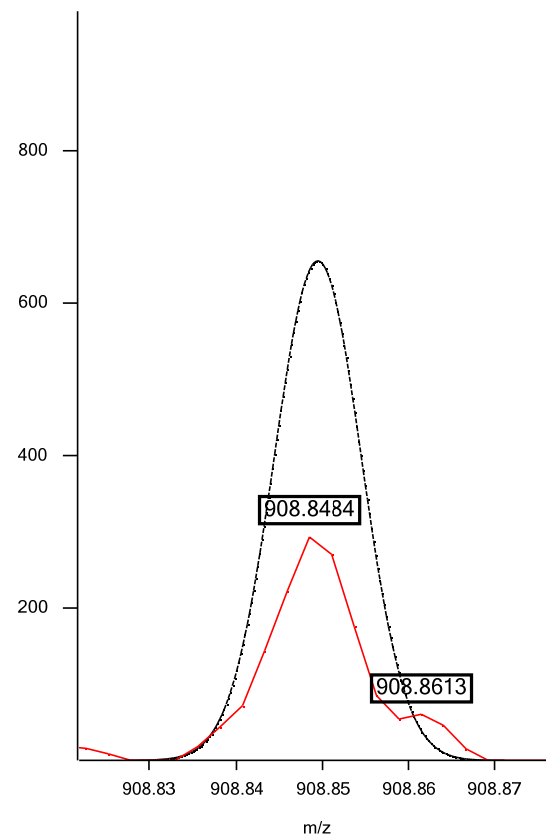

Positive ESI: TAG 54:8; C<sub>57</sub>H<sub>98</sub>NO<sub>6</sub>; theoretical  $m/z$  892.7394, (M+NH<sub>4</sub>)<sup>+</sup>; isotopic fit 0.0121

### Isotope 1

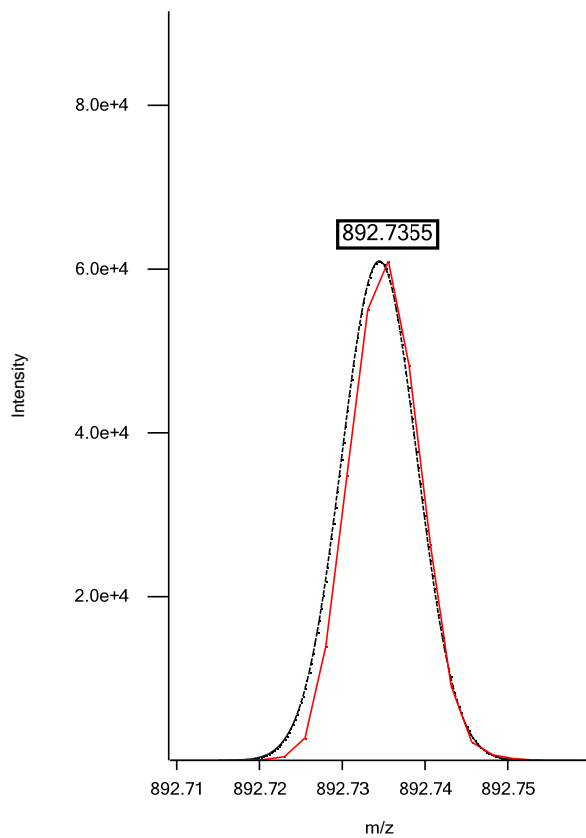

### Isotope 2

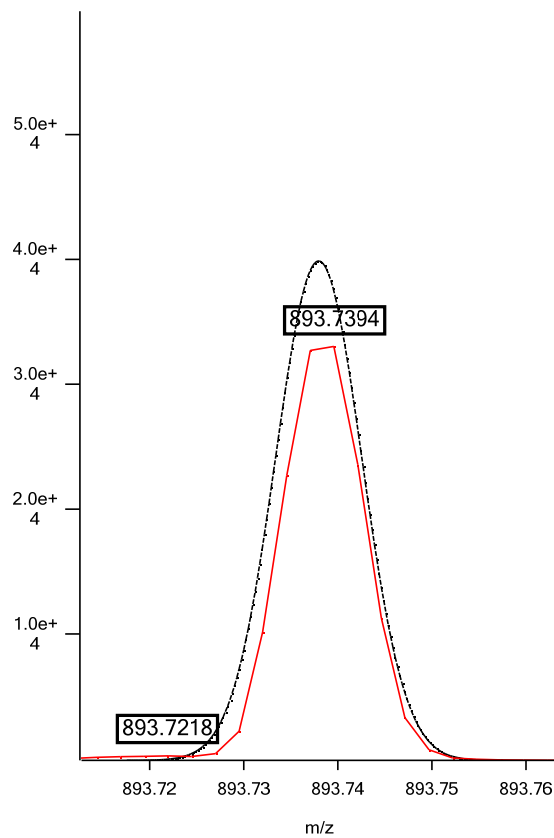

### Isotope 3

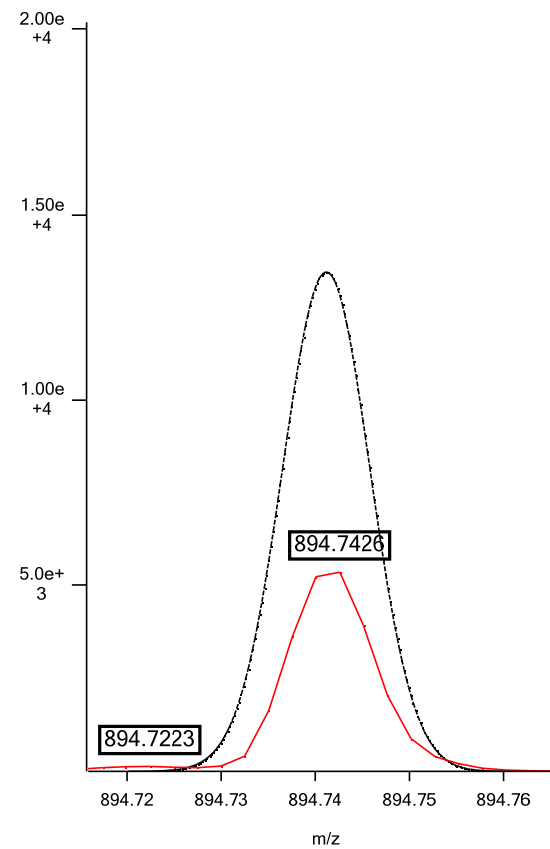

Positive ESI: TAG 56:8; C<sub>59</sub>H<sub>102</sub>NO<sub>6</sub>; theoretical  $m/z$  920.7707, (M+NH<sub>4</sub>)<sup>+</sup>; isotopic fit 0.0066

### Isotope 1

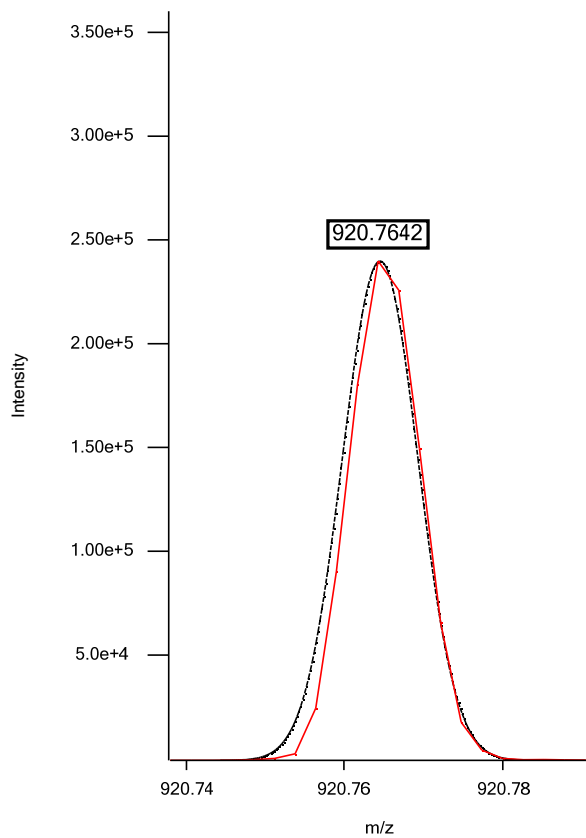

### Isotope 2

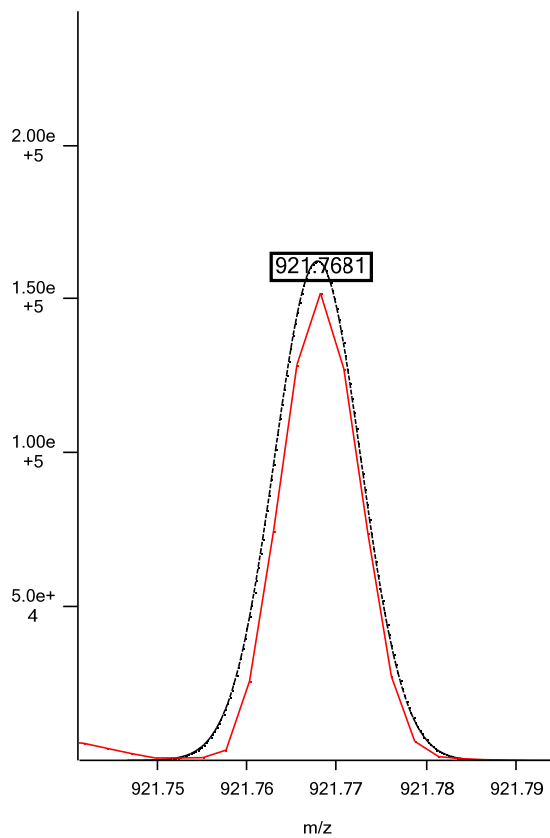

### Isotope 3

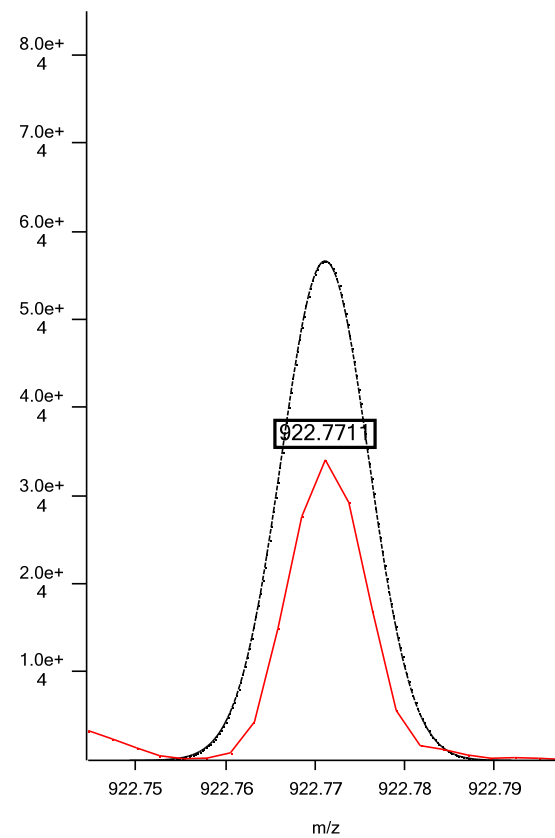

Positive ESI: TAG 56:7; C<sub>59</sub>H<sub>104</sub>NO<sub>6</sub>; theoretical *m/z* 922.7864, (M+NH<sub>4</sub>)<sup>+</sup>; isotopic fit 0.0068

### Isotope 1

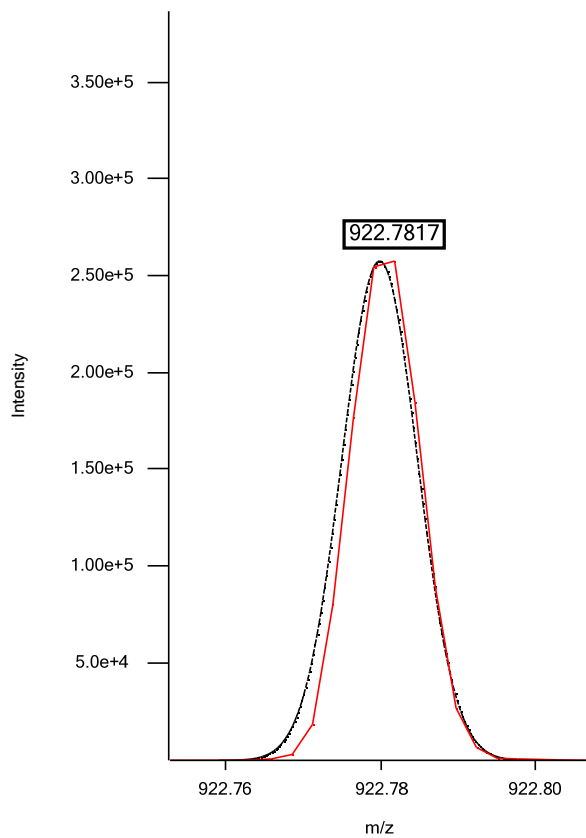

### Isotope 2

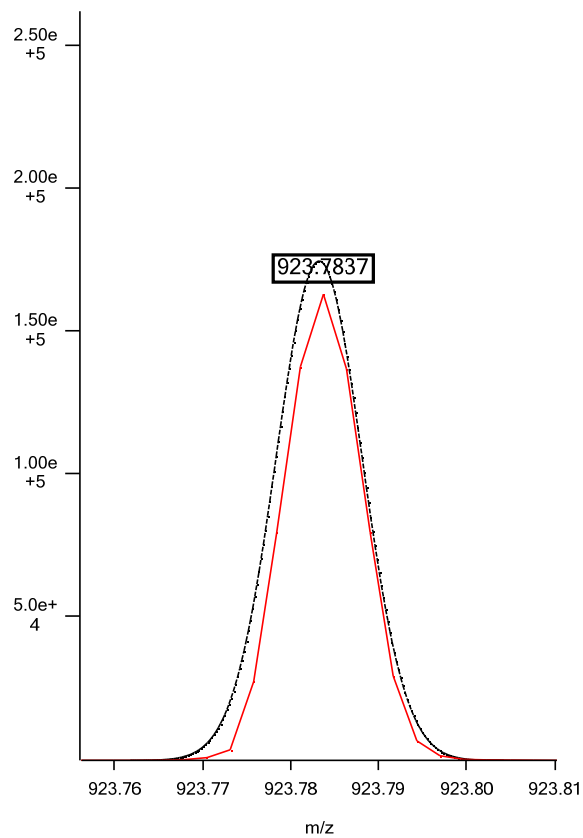

### Isotope 3

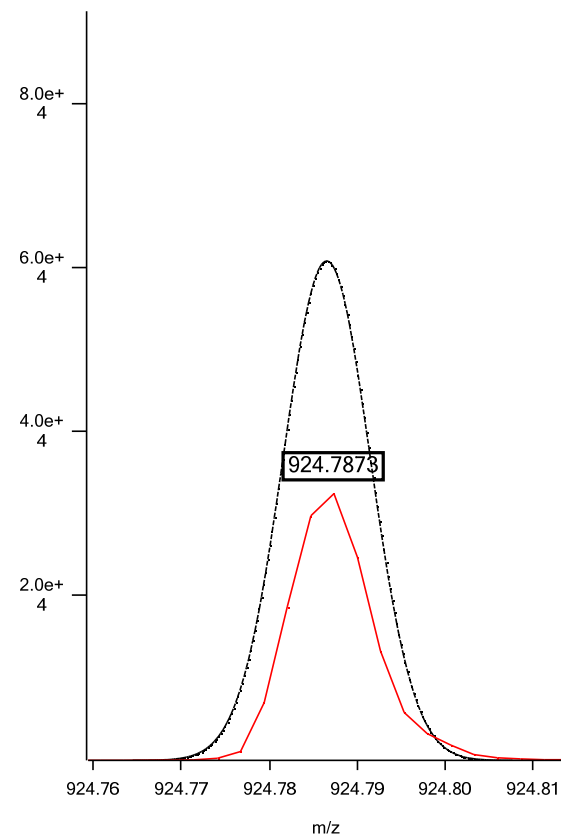

Positive ESI: TAG 56:6; C<sub>59</sub>H<sub>106</sub>NO<sub>6</sub>; theoretical  $m/z$  924.8020, (M+NH<sub>4</sub>)<sup>+</sup>; isotopic fit 0.0068

### Isotope 1

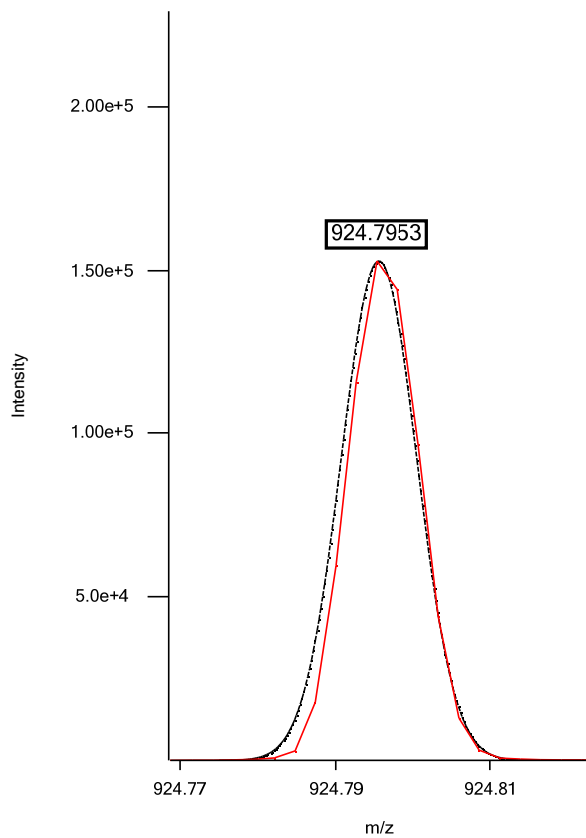

### Isotope 2

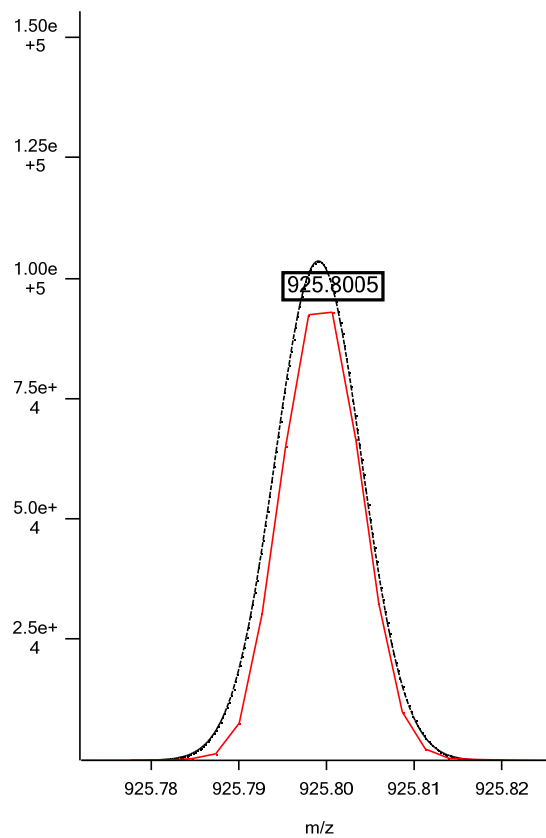

### Isotope 3

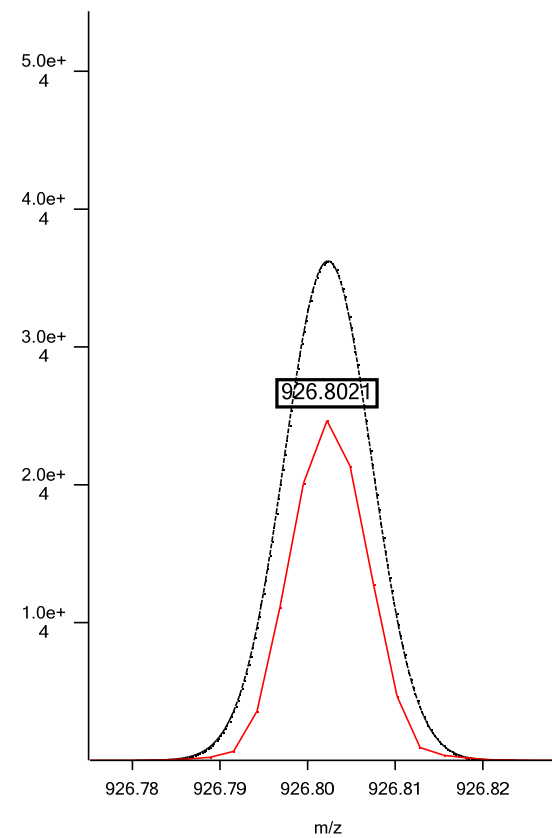

Positive ESI: TAG 56:5; C<sub>59</sub>H<sub>108</sub>NO<sub>6</sub>; theoretical *m/z* 926.8176, (M+NH<sub>4</sub>)<sup>+</sup>; isotopic fit 0.0109

### Isotope 1

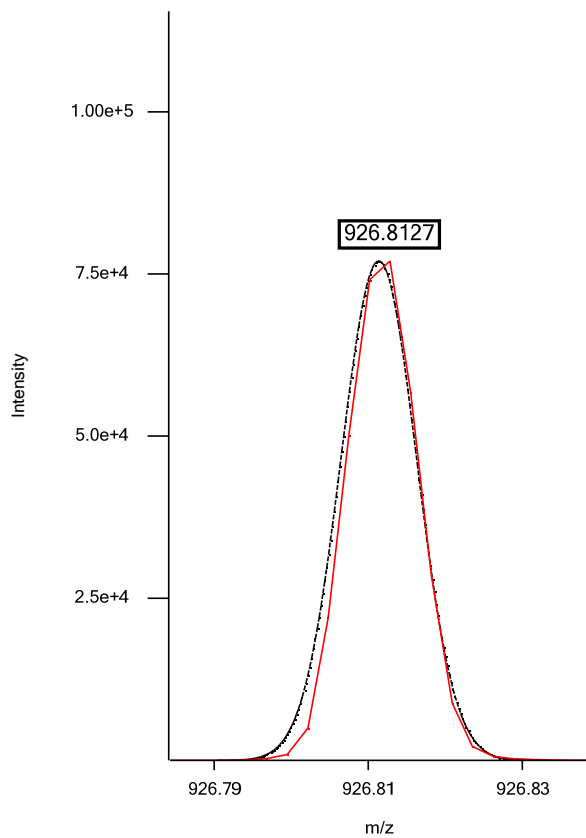

### Isotope 2

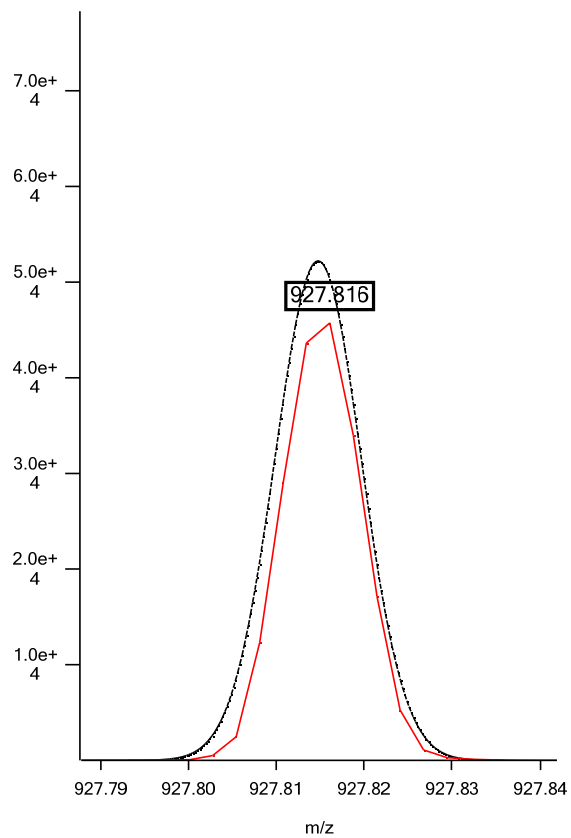

### Isotope 3

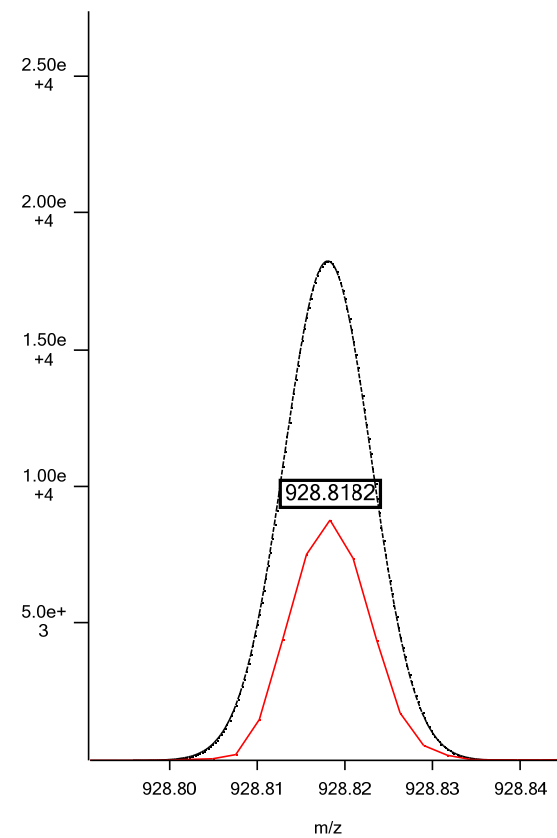



Positive ESI: TAG 56:4; C<sub>59</sub>H<sub>110</sub>NO<sub>6</sub>; theoretical  $m/z$  928.8333, (M+NH<sub>4</sub>)<sup>+</sup>; isotopic fit 0.0335

### Isotope 1

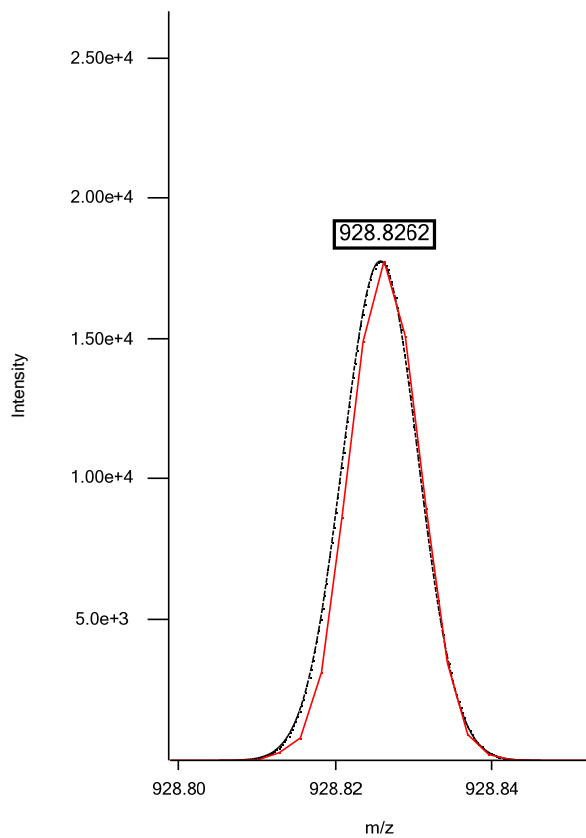

### Isotope 2

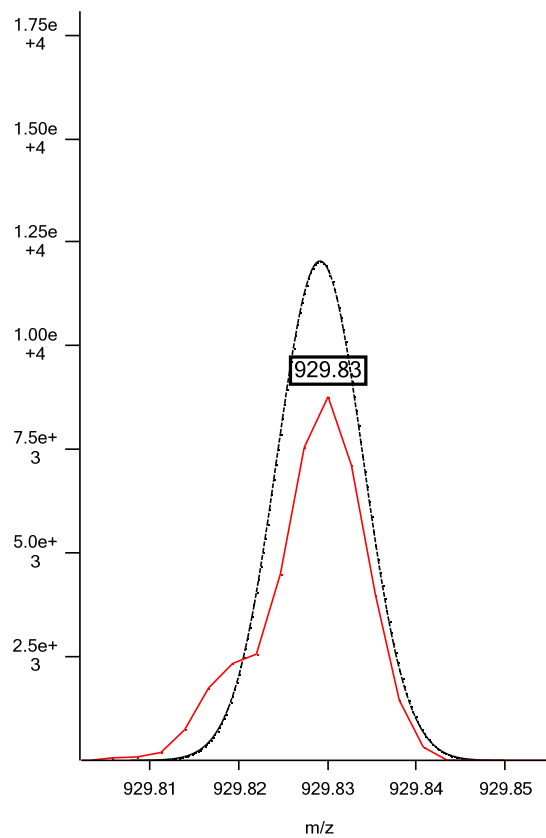

### Isotope 3

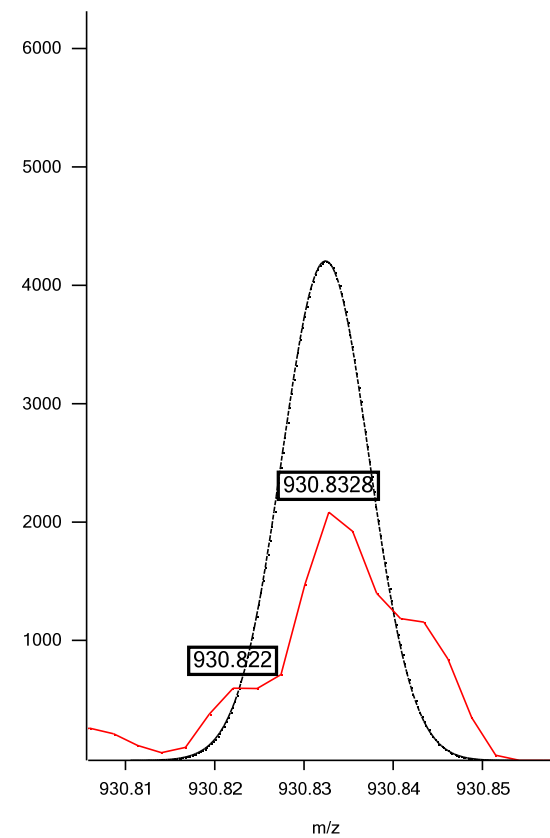

Positive ESI: TAG 56:3; C<sub>59</sub>H<sub>112</sub>NO<sub>6</sub>; theoretical *m/z* 930.8489, (M+NH<sub>4</sub>)<sup>+</sup>; isotopic fit 0.0101

### Isotope 1

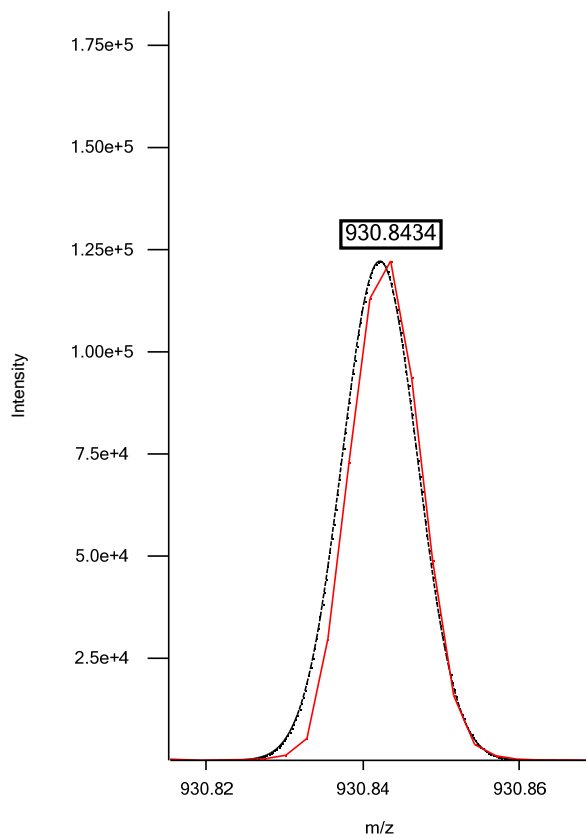

### Isotope 2

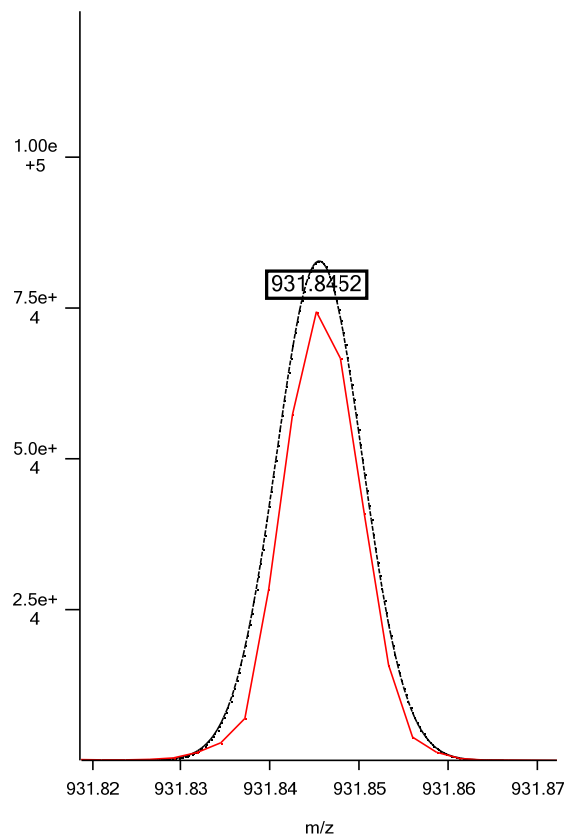

### Isotope 3

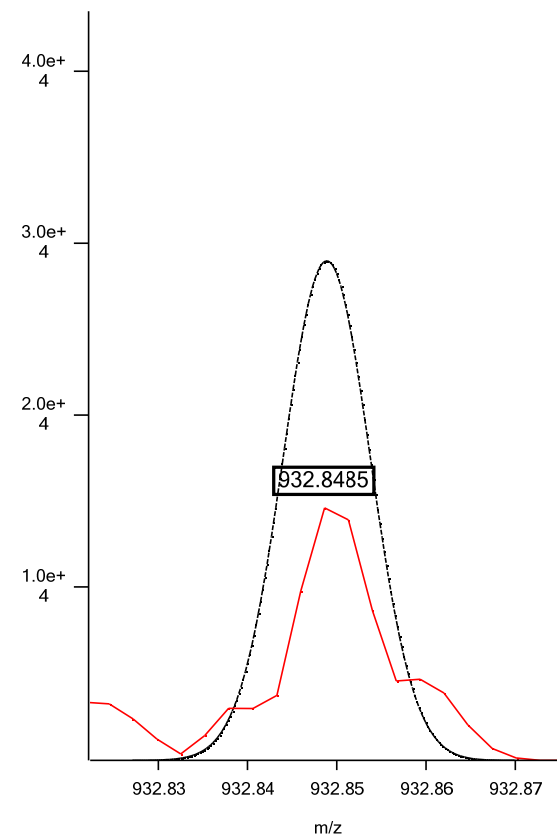

Positive ESI: TAG 56:2; C<sub>59</sub>H<sub>114</sub>NO<sub>6</sub>; theoretical *m/z* 932.8646, (M+NH<sub>4</sub>)<sup>+</sup>; isotopic fit 0.0250

### Isotope 1

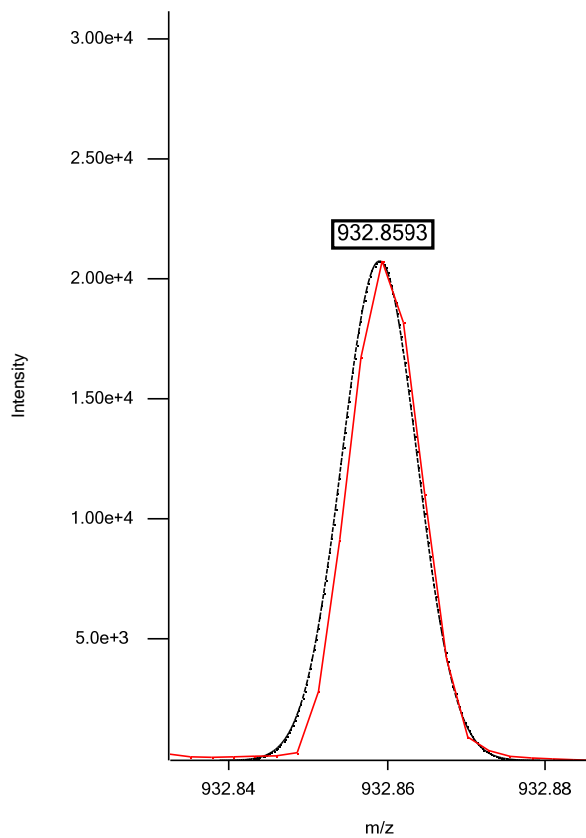

### Isotope 2

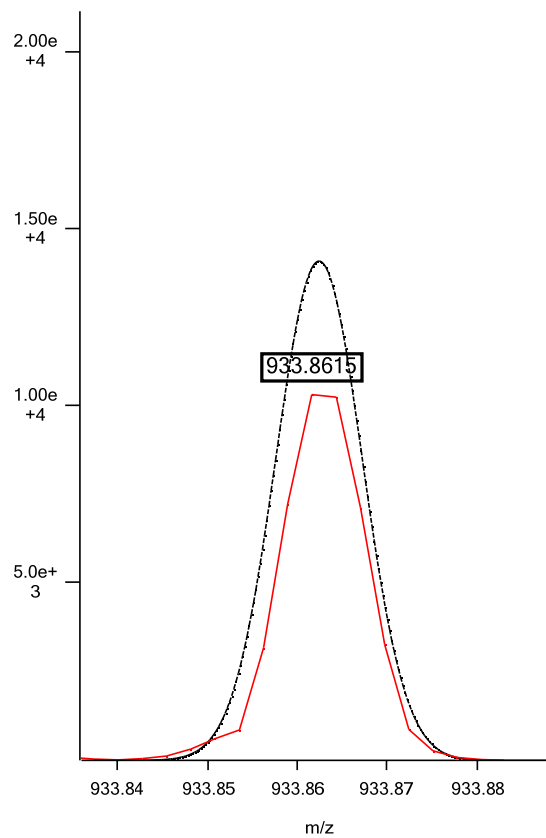

### Isotope 3

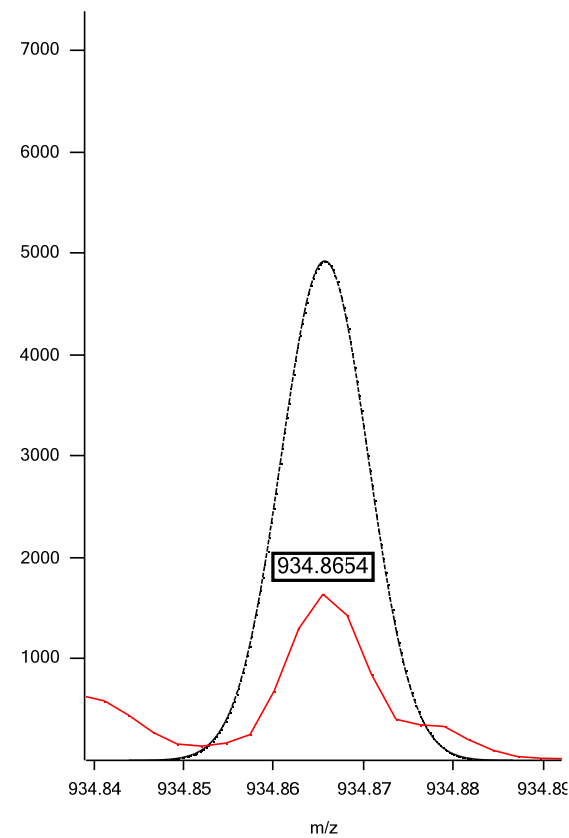

Positive ESI: TAG 56:1;  $C_{59}H_{116}NO_6$ ; theoretical  $m/z$  934.8802,  $(M+NH_4)^+$ ; isotopic fit 0.0185

### Isotope 1

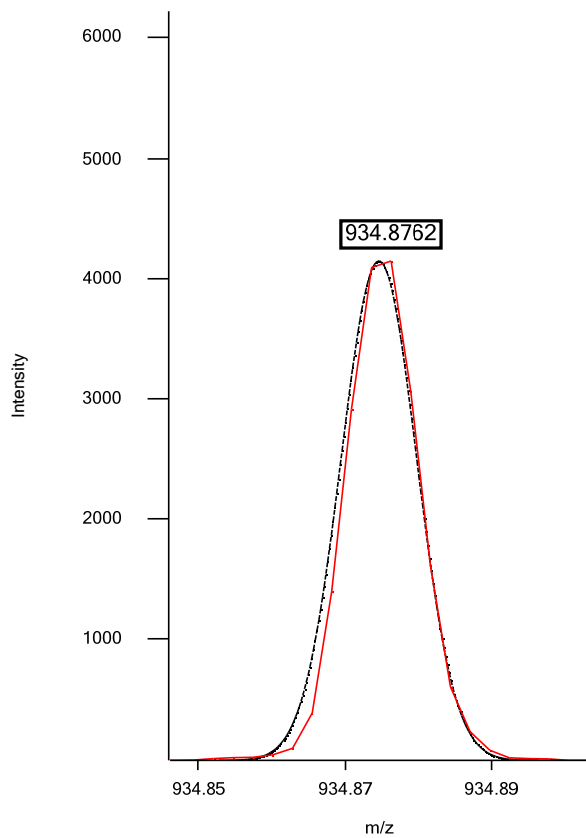

### Isotope 2

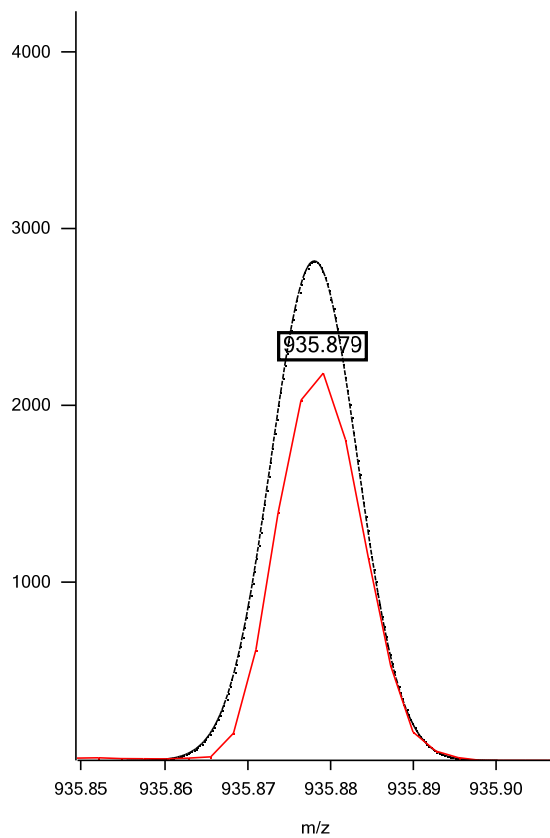

### Isotope 3

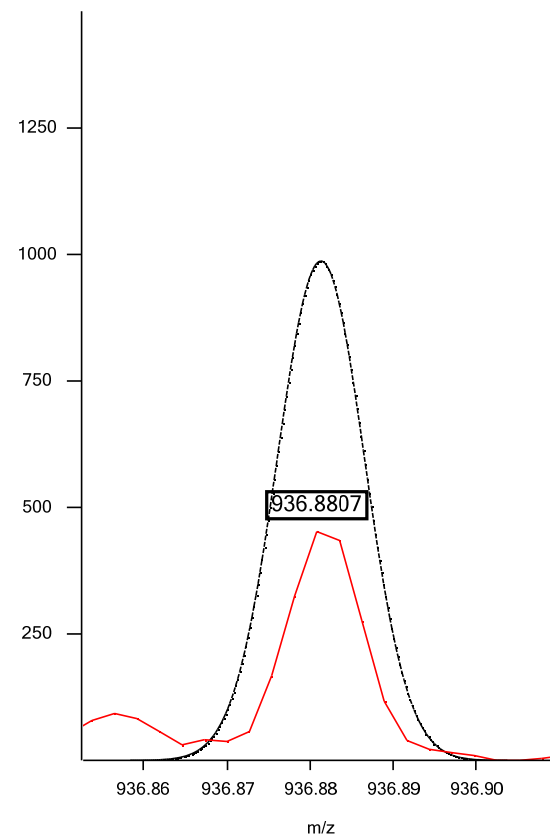

Supplement: NIHMS66614-supplement-01.pdf [file NIHMS66614-supplement-01.pdf]
