# Supplementary material
Source: PubMed Central journal article supplement (PMC2598838)

# Representative MS/MS spectra of identified lipids

# Glycerophosphoserines

(Neutral loss-triggered MS<sup>3</sup> – 185 Da)

# Low mass measurement accuracy MS/MS utilizing LTQ

Positive ESI: LPS 18:2;  $C_{24}H_{44}NO_9P$ ; theoretical  $m/z$  522.3,  $(M+H)^+$

## Neutral loss-triggered MS<sup>3</sup>

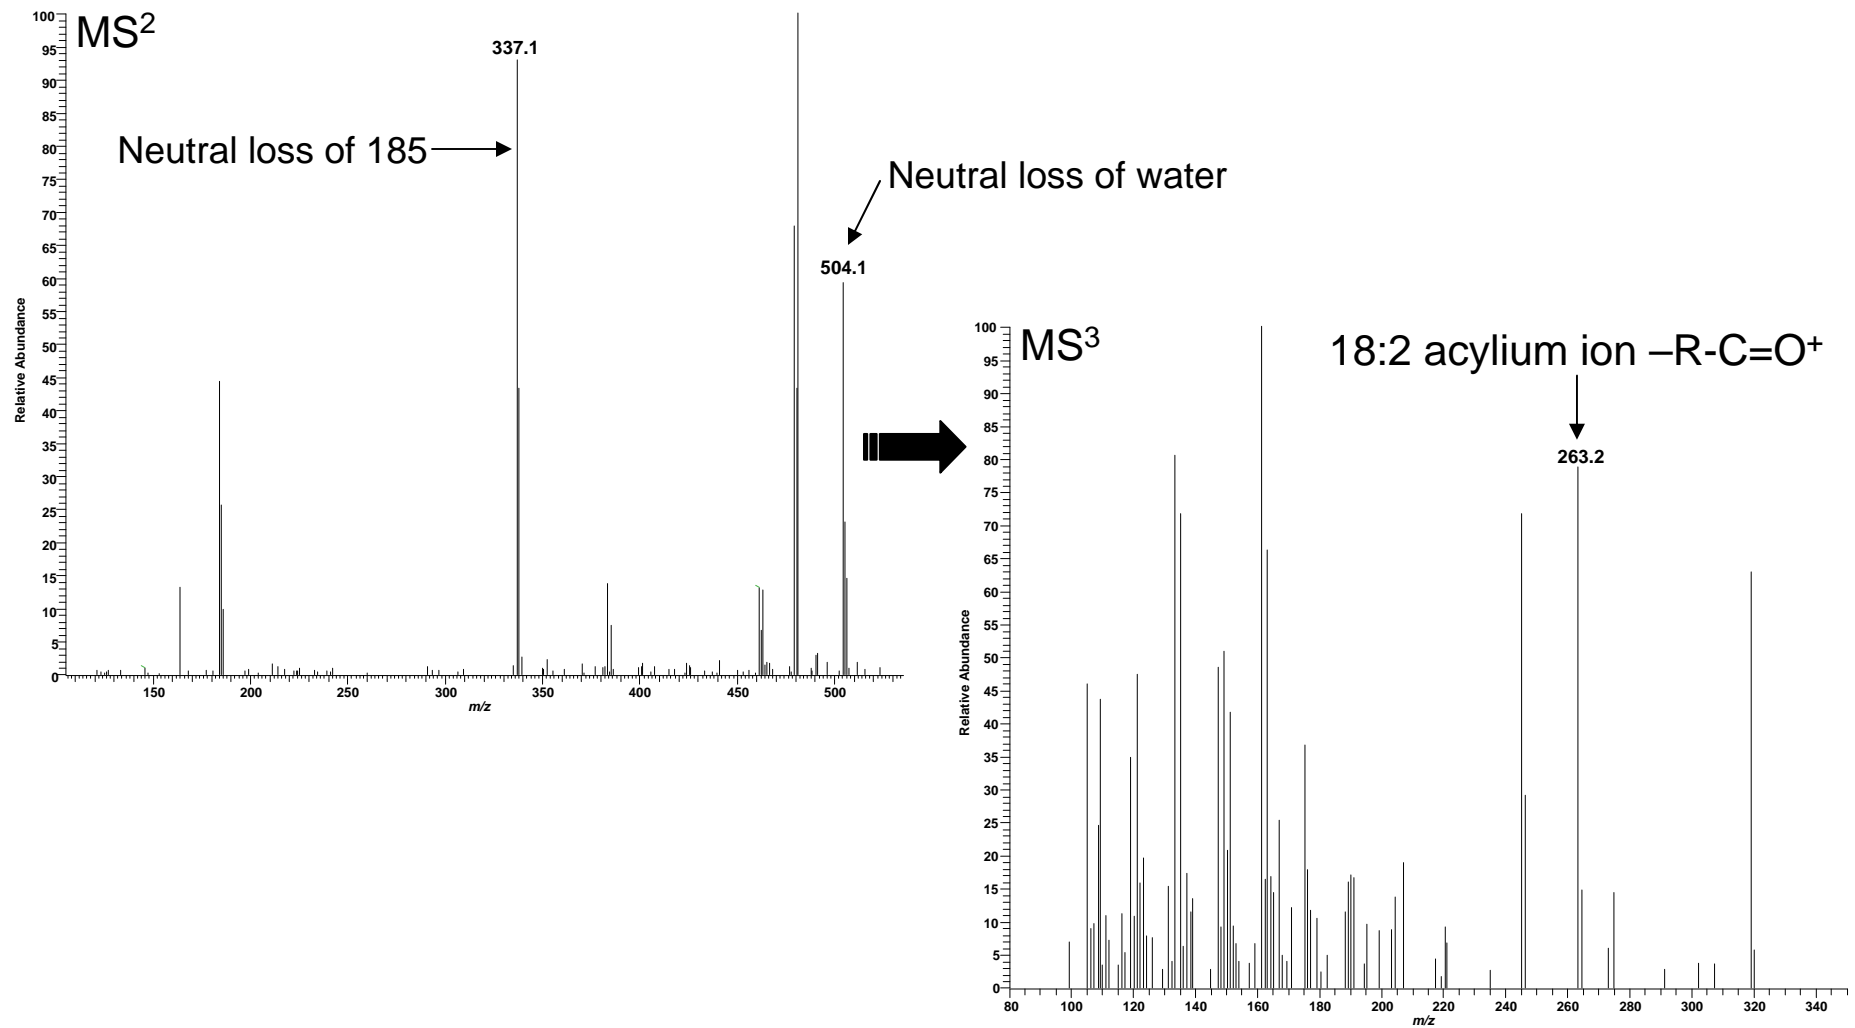

# Low mass measurement accuracy MS/MS utilizing LTQ

Positive ESI: LPS 18:1;  $C_{24}H_{46}NO_9P$ ; theoretical  $m/z$  524.3,  $(M+H)^+$

## Neutral loss-triggered MS<sup>3</sup>

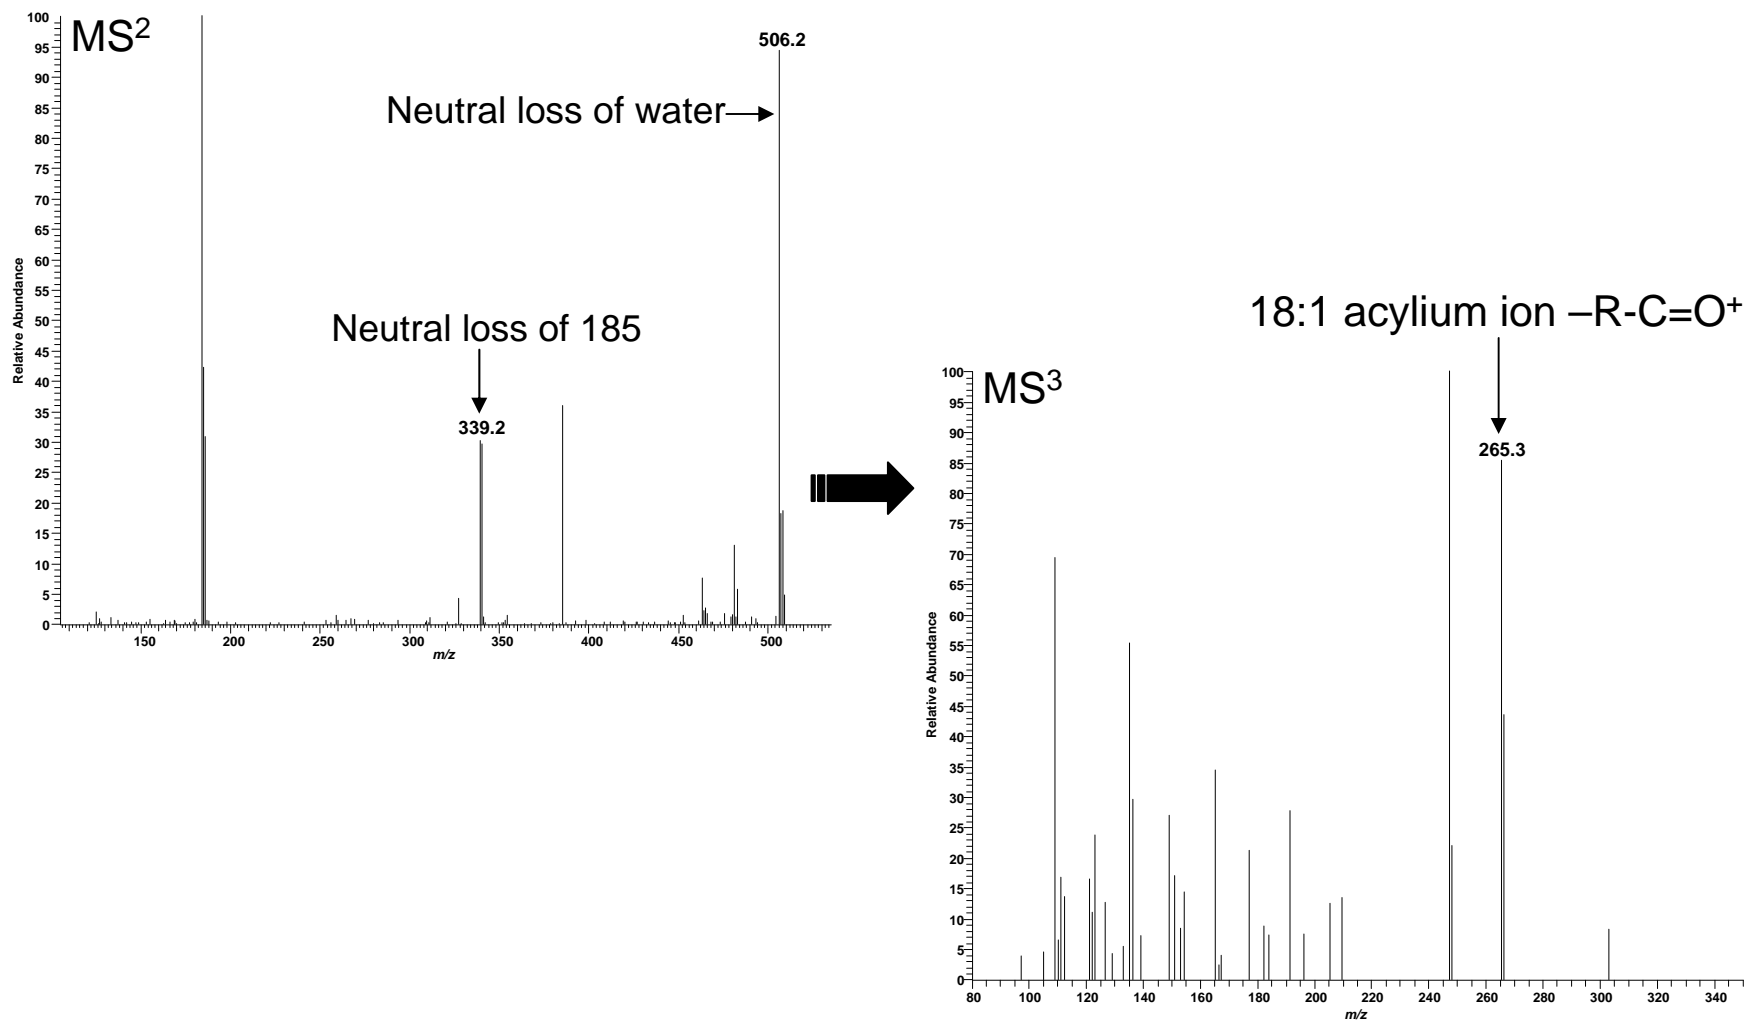

Glycerophosphoethanolamines

# High mass measurement accuracy MS/MS utilizing LTQ-FT

Positive ESI: LPE 20:5;  $C_{25}H_{42}NO_7P$ ; theoretical  $m/z$  500.2777,  $(M+H)^+$

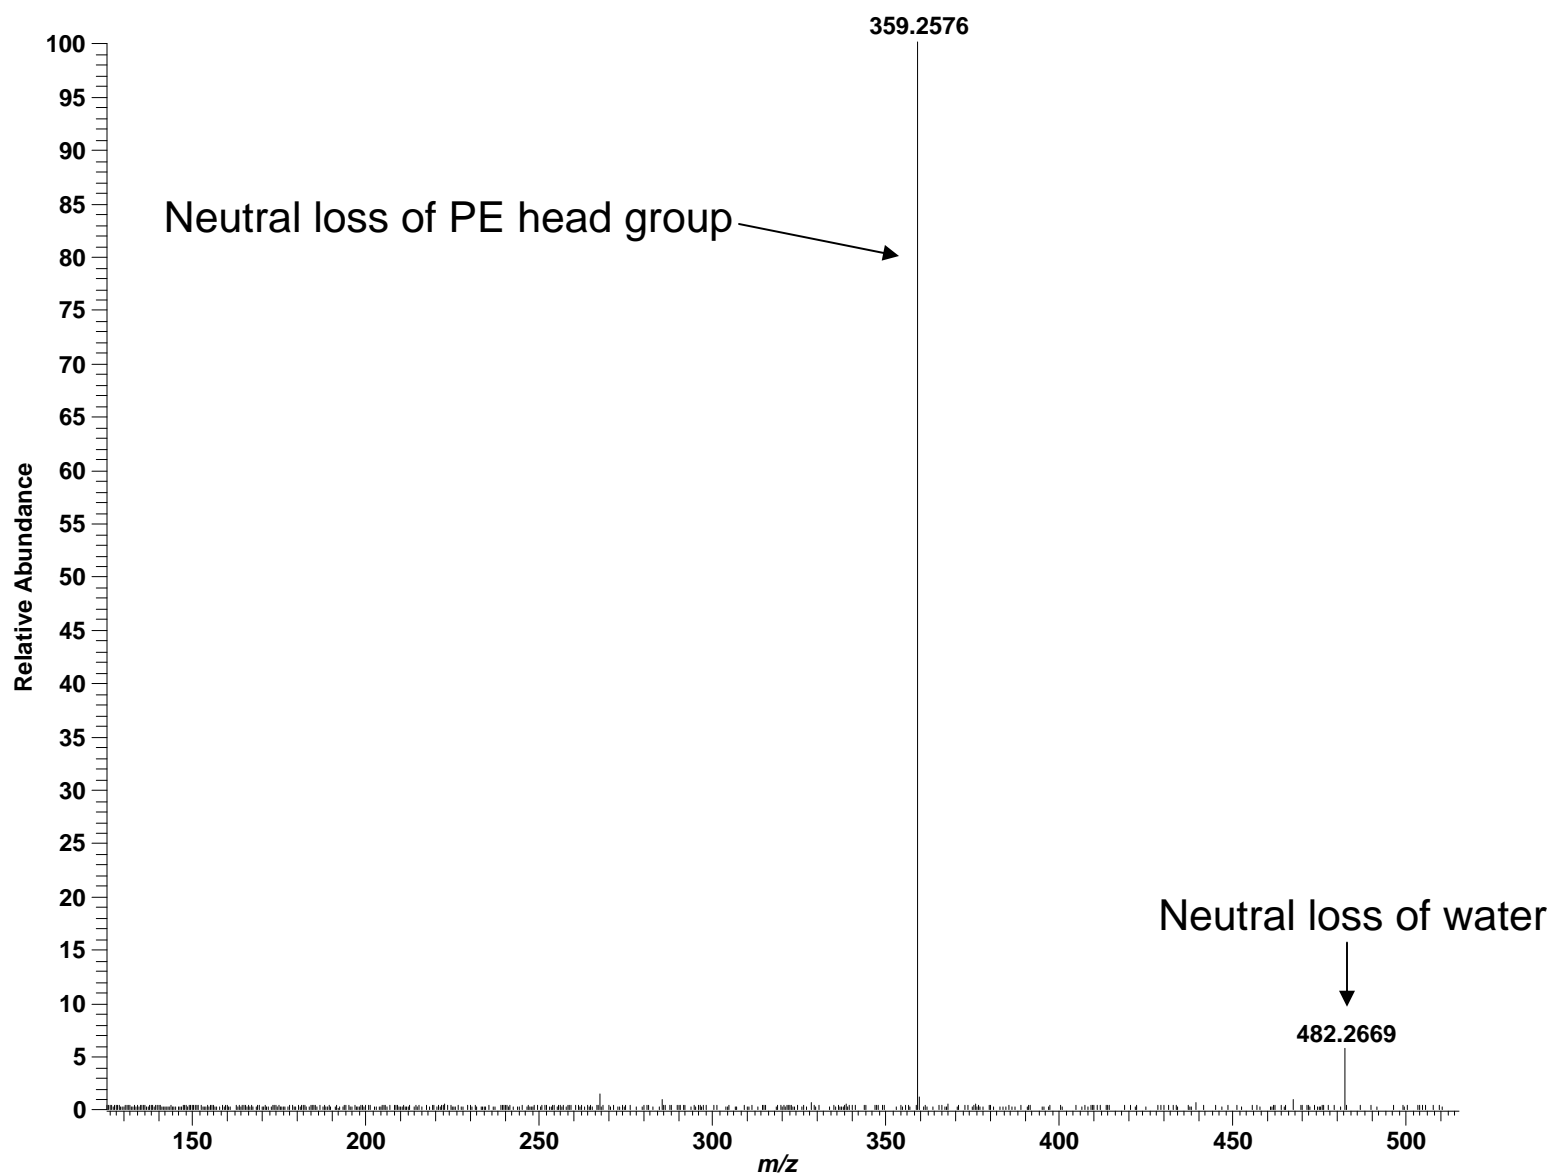

# High mass measurement accuracy MS/MS utilizing LTQ-FT

Negative ESI: LPE 20:5;  $C_{25}H_{42}NO_7P$ ; theoretical  $m/z$  498.2621, (M-H)<sup>-</sup>

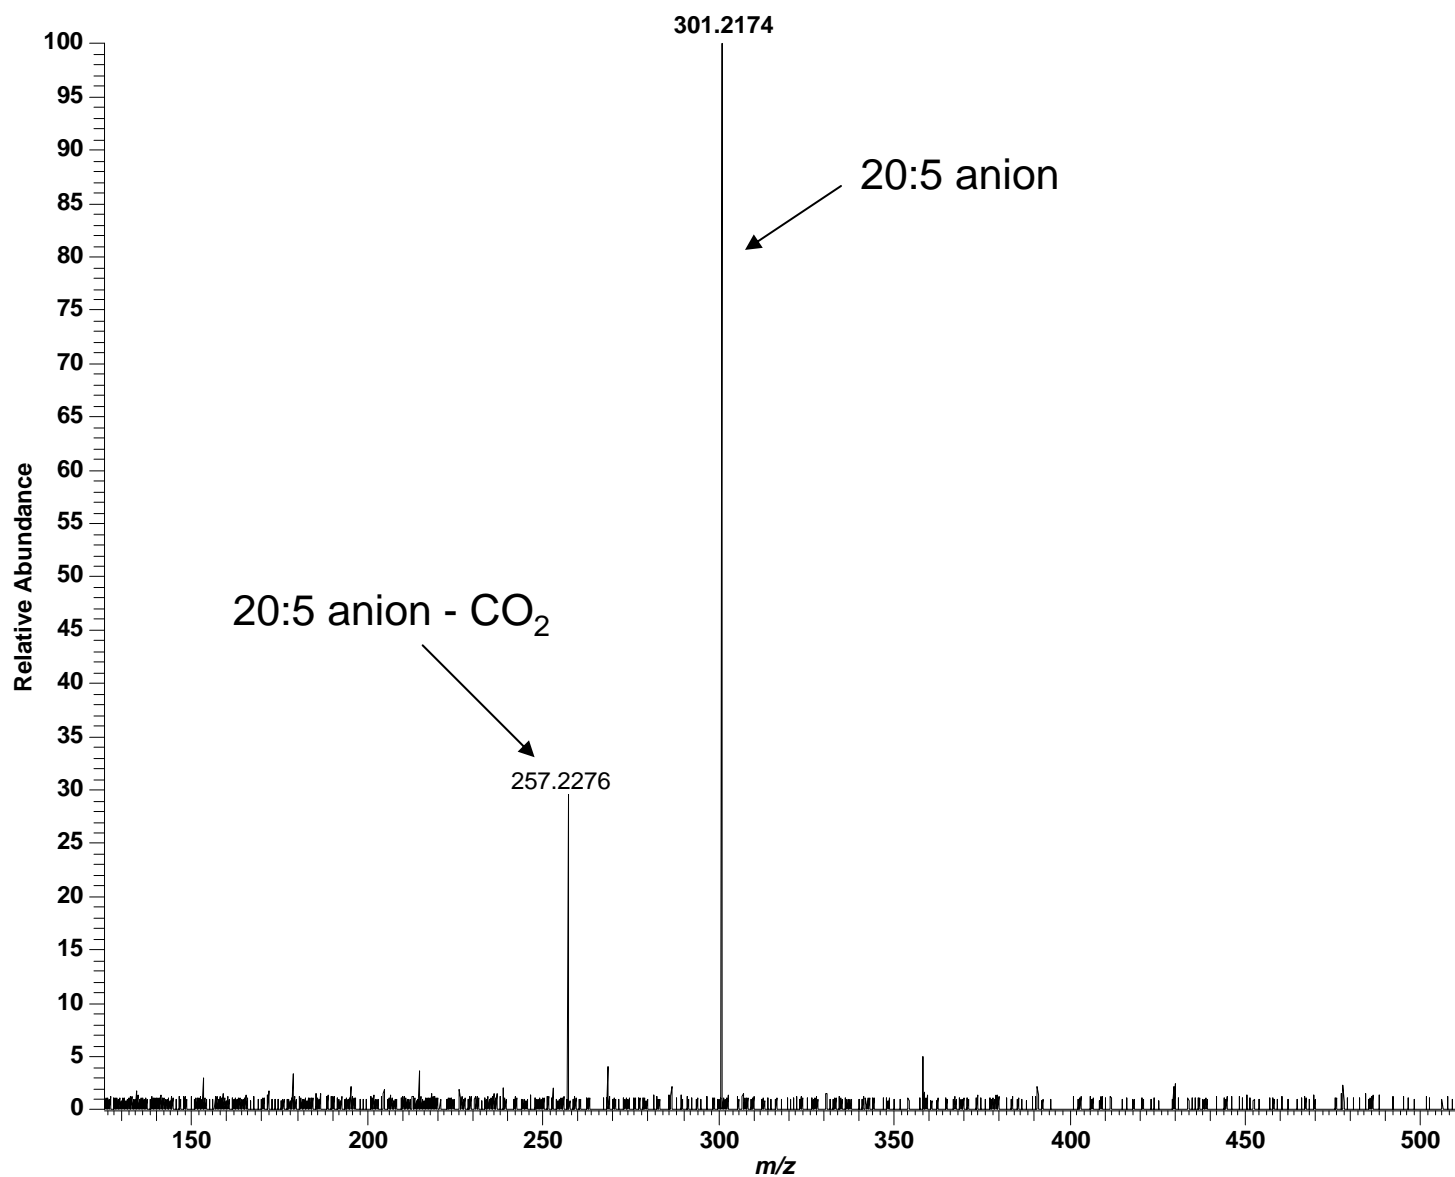

# High mass measurement accuracy MS/MS utilizing LTQ-FT

Positive ESI: LPE 20:4;  $C_{25}H_{44}NO_7P$ ; theoretical  $m/z$  502.2933,  $(M+H)^+$

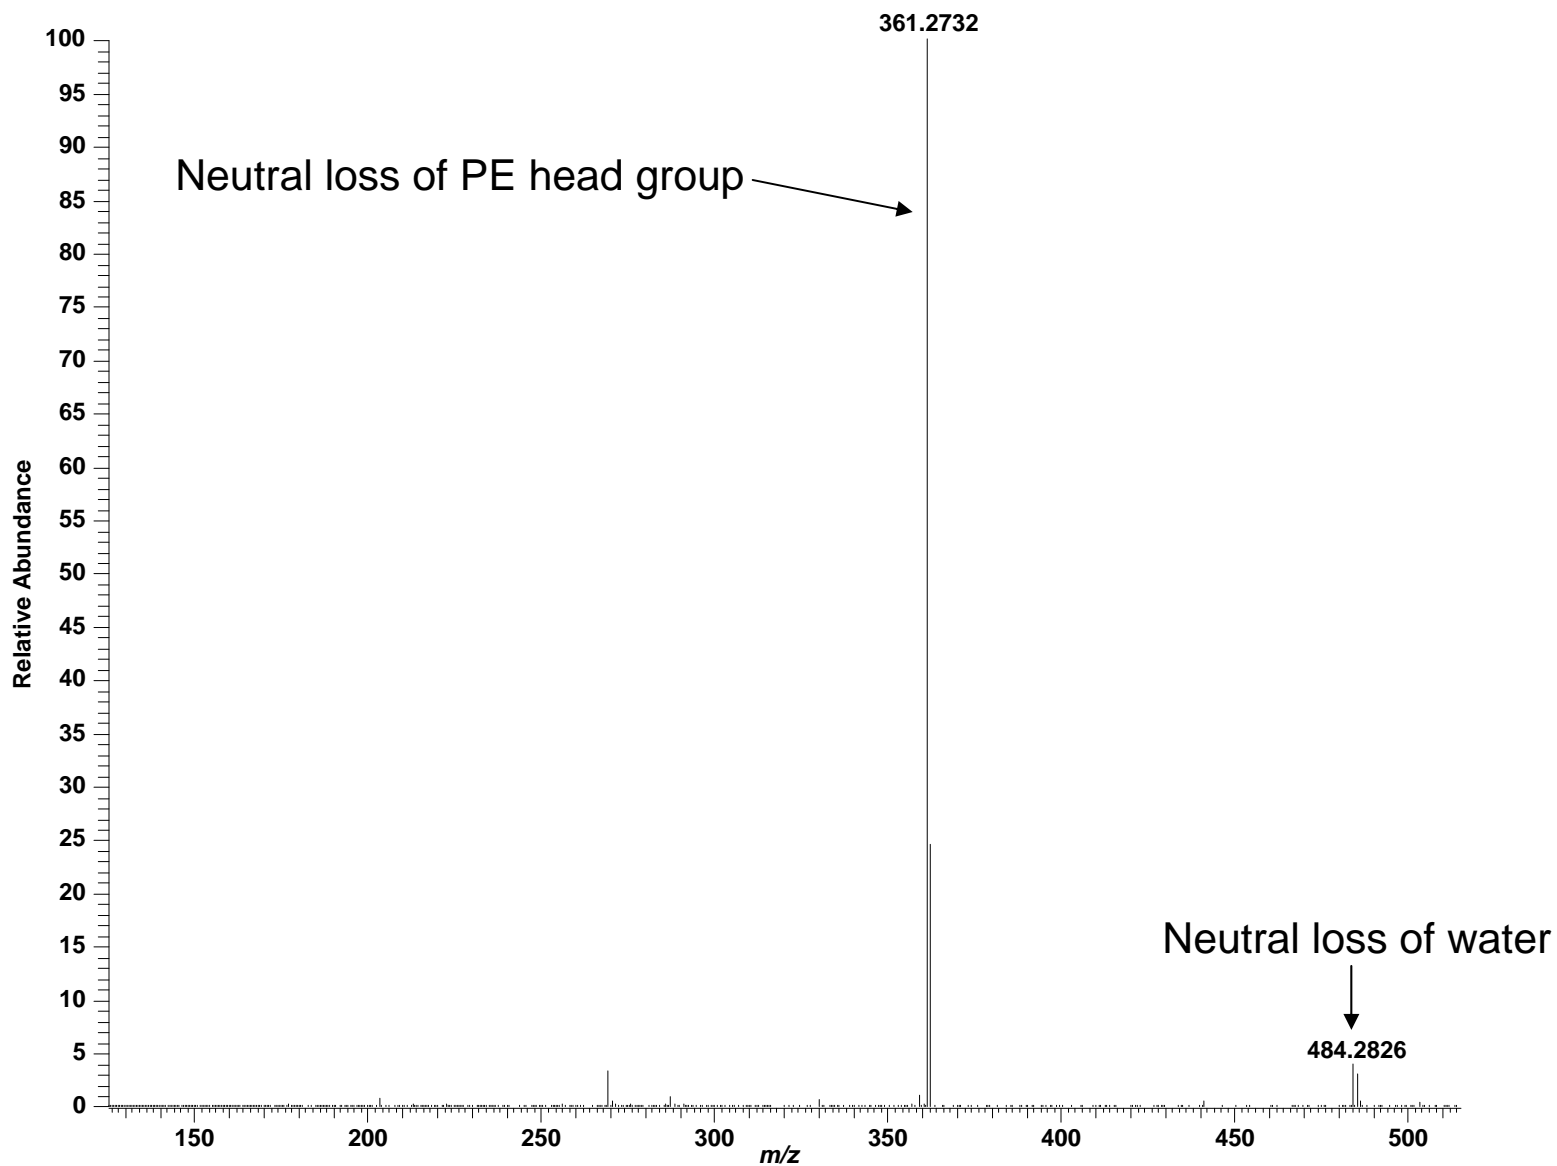



# High mass measurement accuracy MS/MS utilizing LTQ-FT

Negative ESI: LPE 20:4;  $C_{25}H_{44}NO_7P$ ; theoretical  $m/z$  500.2777,  $(M-H)^-$

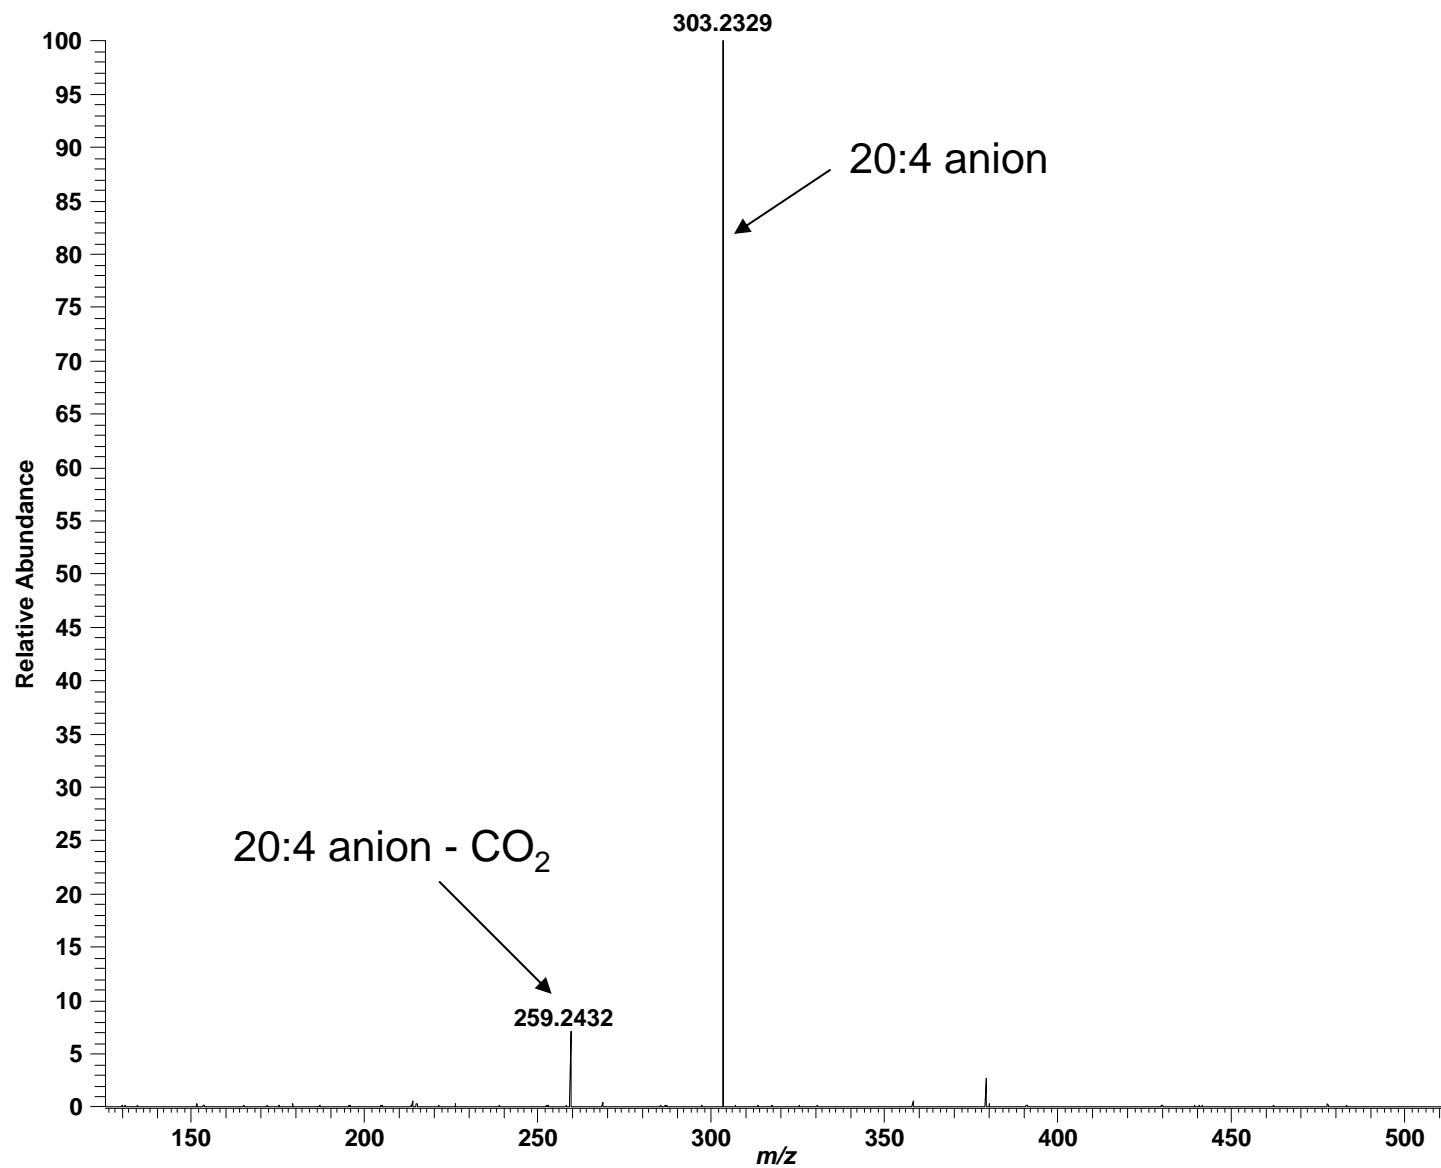

# High mass measurement accuracy MS/MS utilizing LTQ-FT

Positive ESI: LPE 22:6;  $C_{27}H_{44}NO_7P$ ; theoretical  $m/z$  526.2933,  $(M+H)^+$

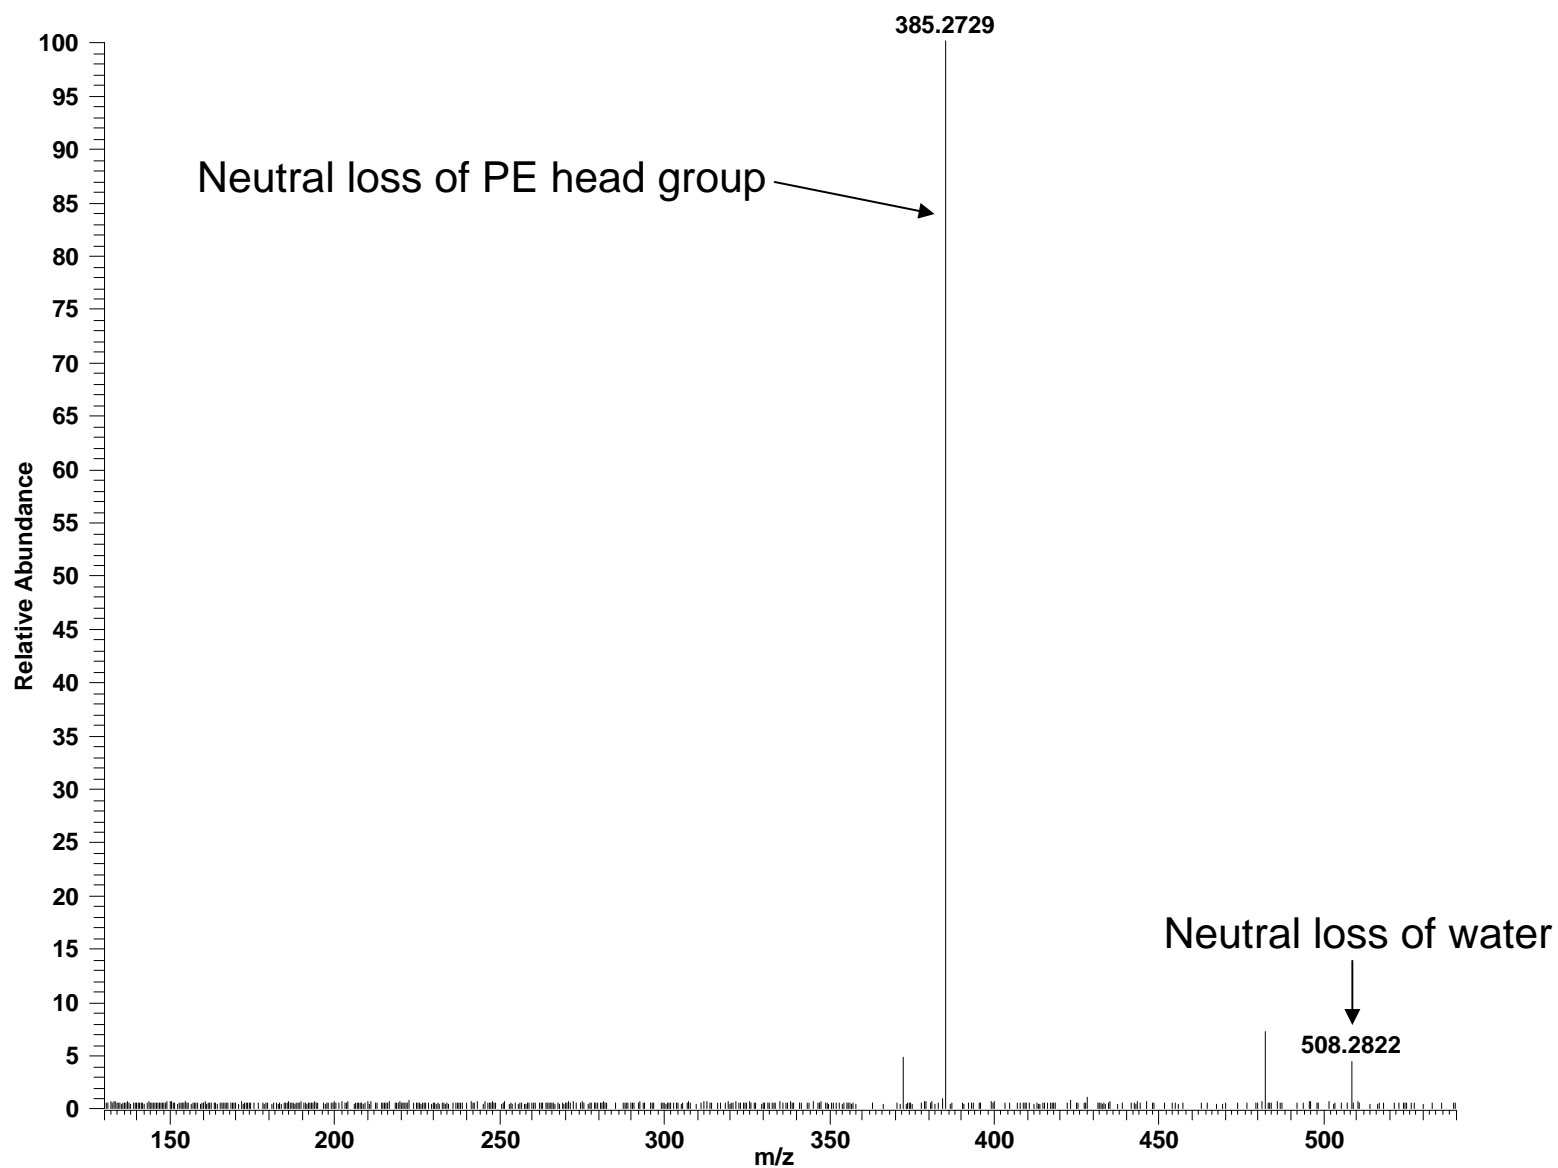

# High mass measurement accuracy MS/MS utilizing LTQ-FT

Negative ESI: LPE 22:6;  $C_{27}H_{44}NO_7P$ ; theoretical  $m/z$  524.2777,  $(M-H)^-$

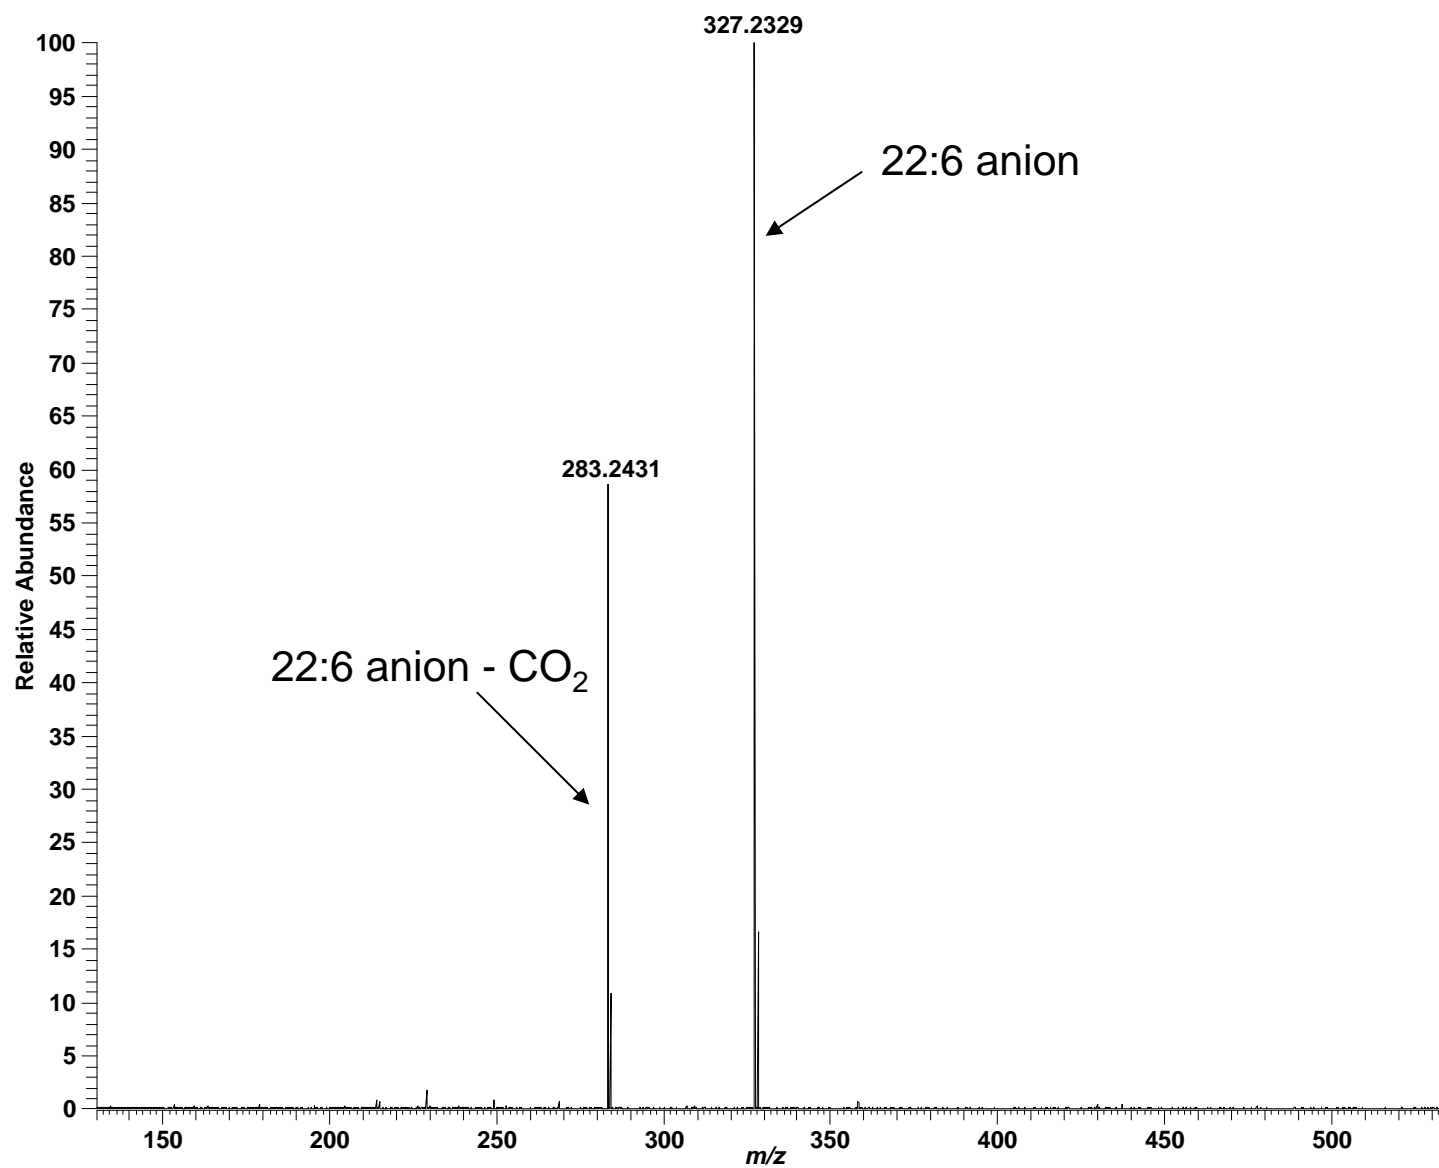

# High mass measurement accuracy MS/MS utilizing LTQ-FT

Positive ESI: LPE 22:5;  $C_{27}H_{46}NO_7P$ ; theoretical  $m/z$  528.3090,  $(M+H)^+$

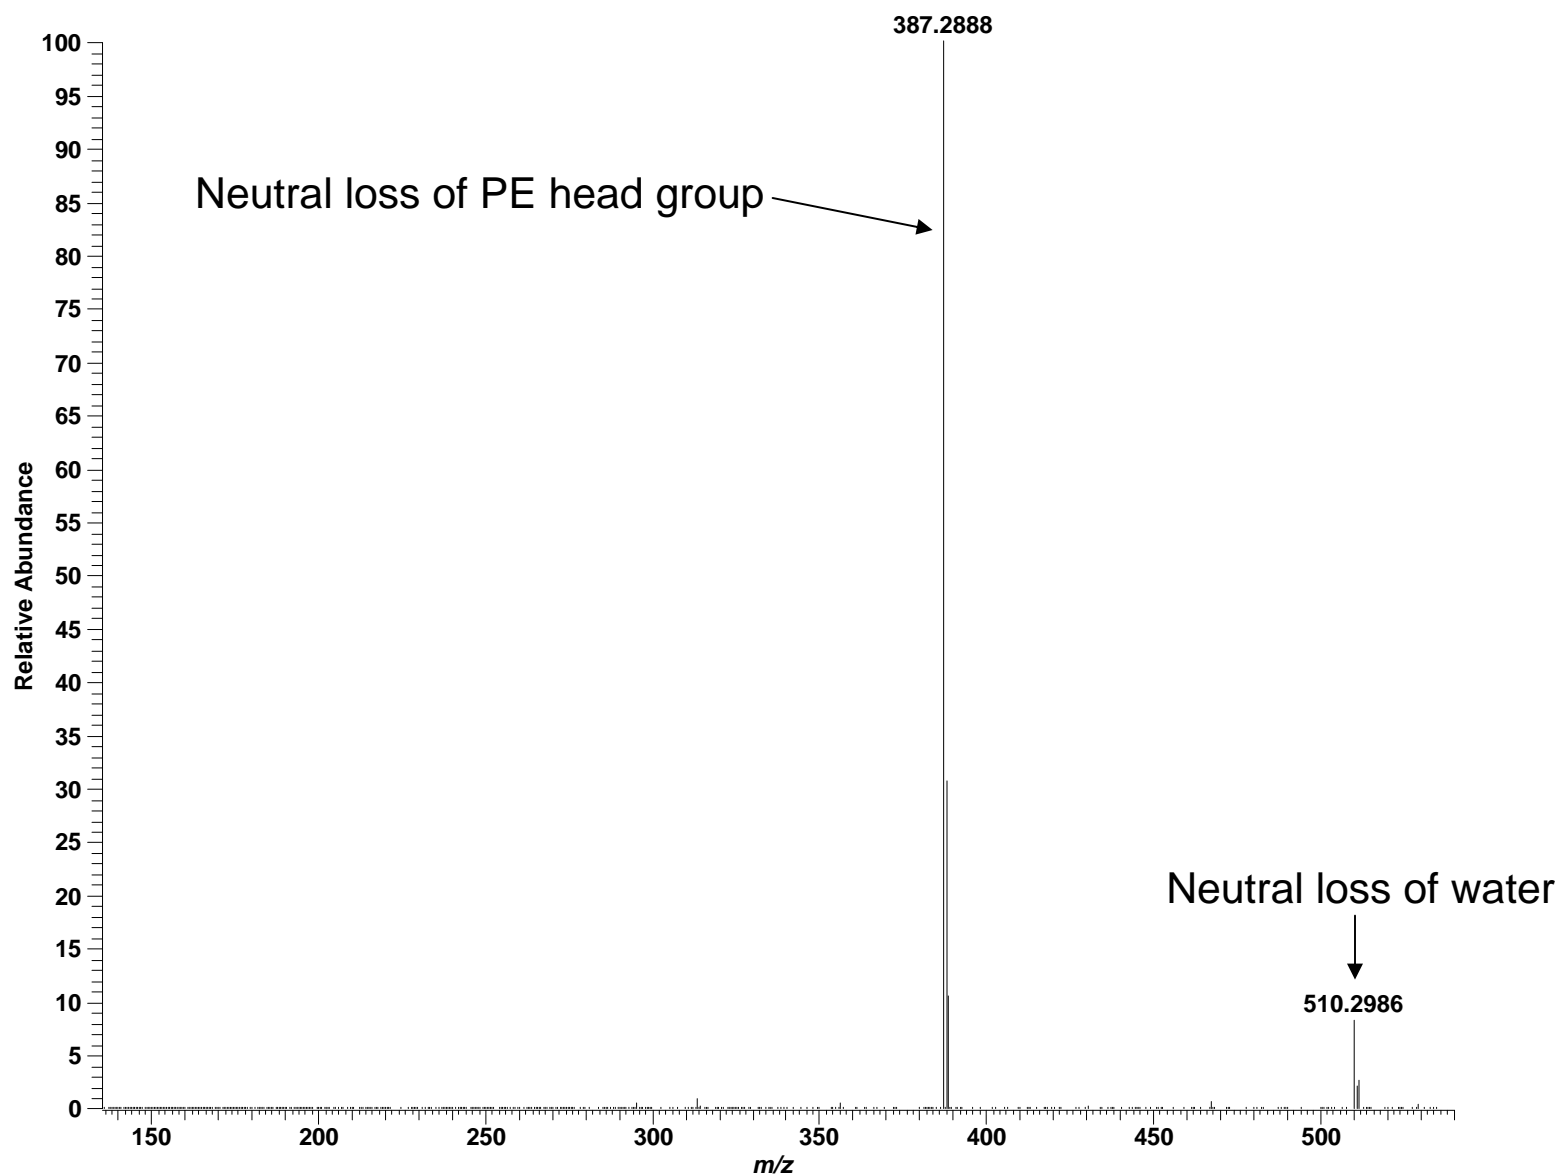

# High mass measurement accuracy MS/MS utilizing LTQ-FT

Negative ESI: LPE 22:5;  $C_{27}H_{46}NO_7P$ ; theoretical  $m/z$  526.2933, (M-H)<sup>-</sup>

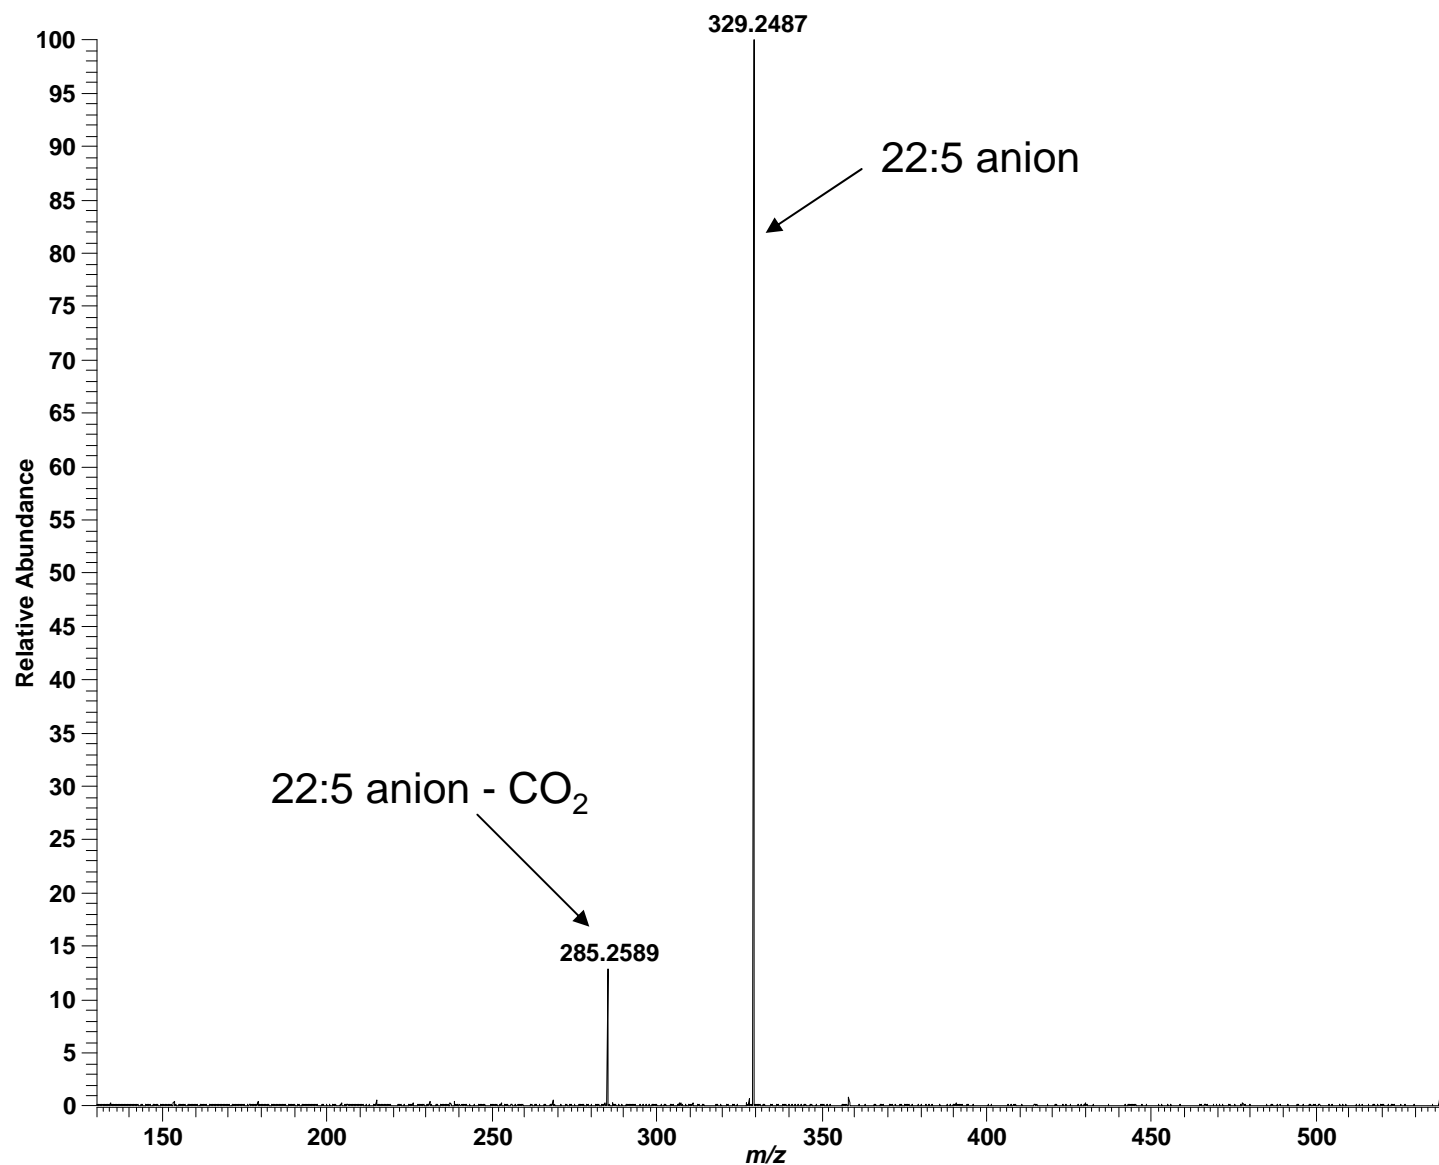

# High mass measurement accuracy MS/MS utilizing LTQ-FT

Positive ESI: LPE 22:4;  $C_{27}H_{48}NO_7P$ ; theoretical  $m/z$  530.3246, (M+H)<sup>+</sup>

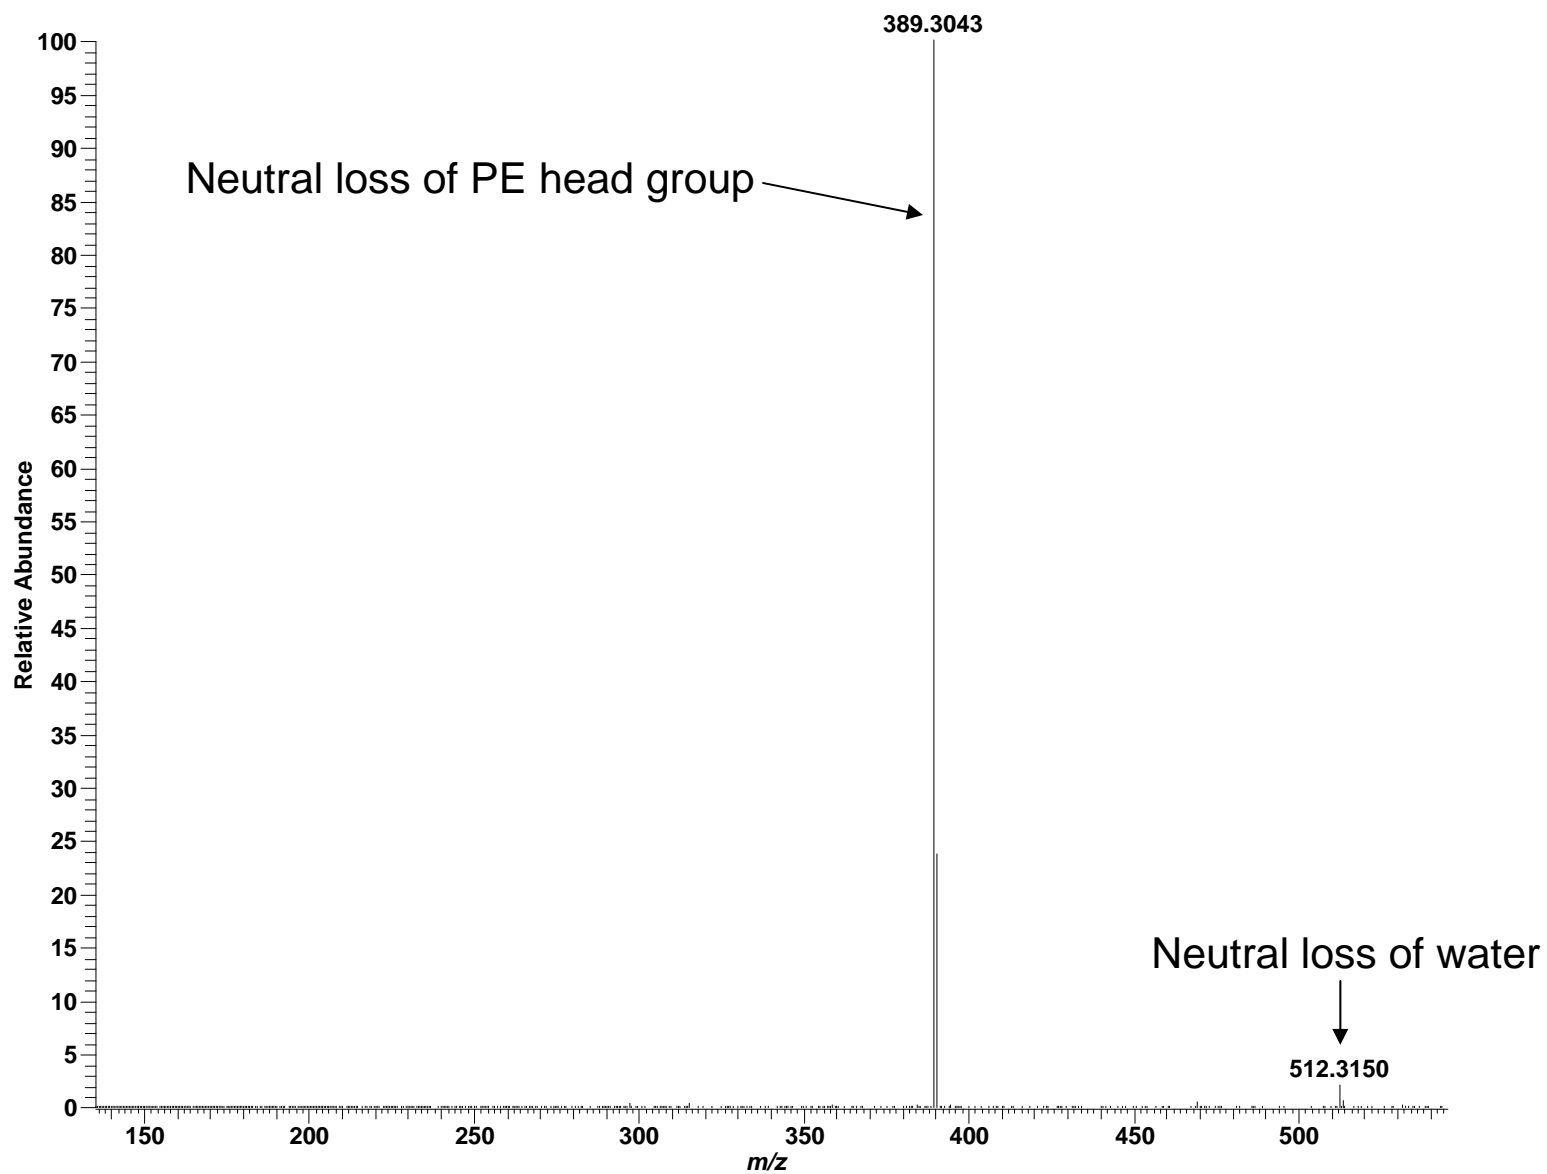

# High mass measurement accuracy MS/MS utilizing LTQ-FT

Negative ESI: LPE 22:4;  $C_{27}H_{48}NO_7P$ ; theoretical  $m/z$  528.3090, (M-H)<sup>-</sup>

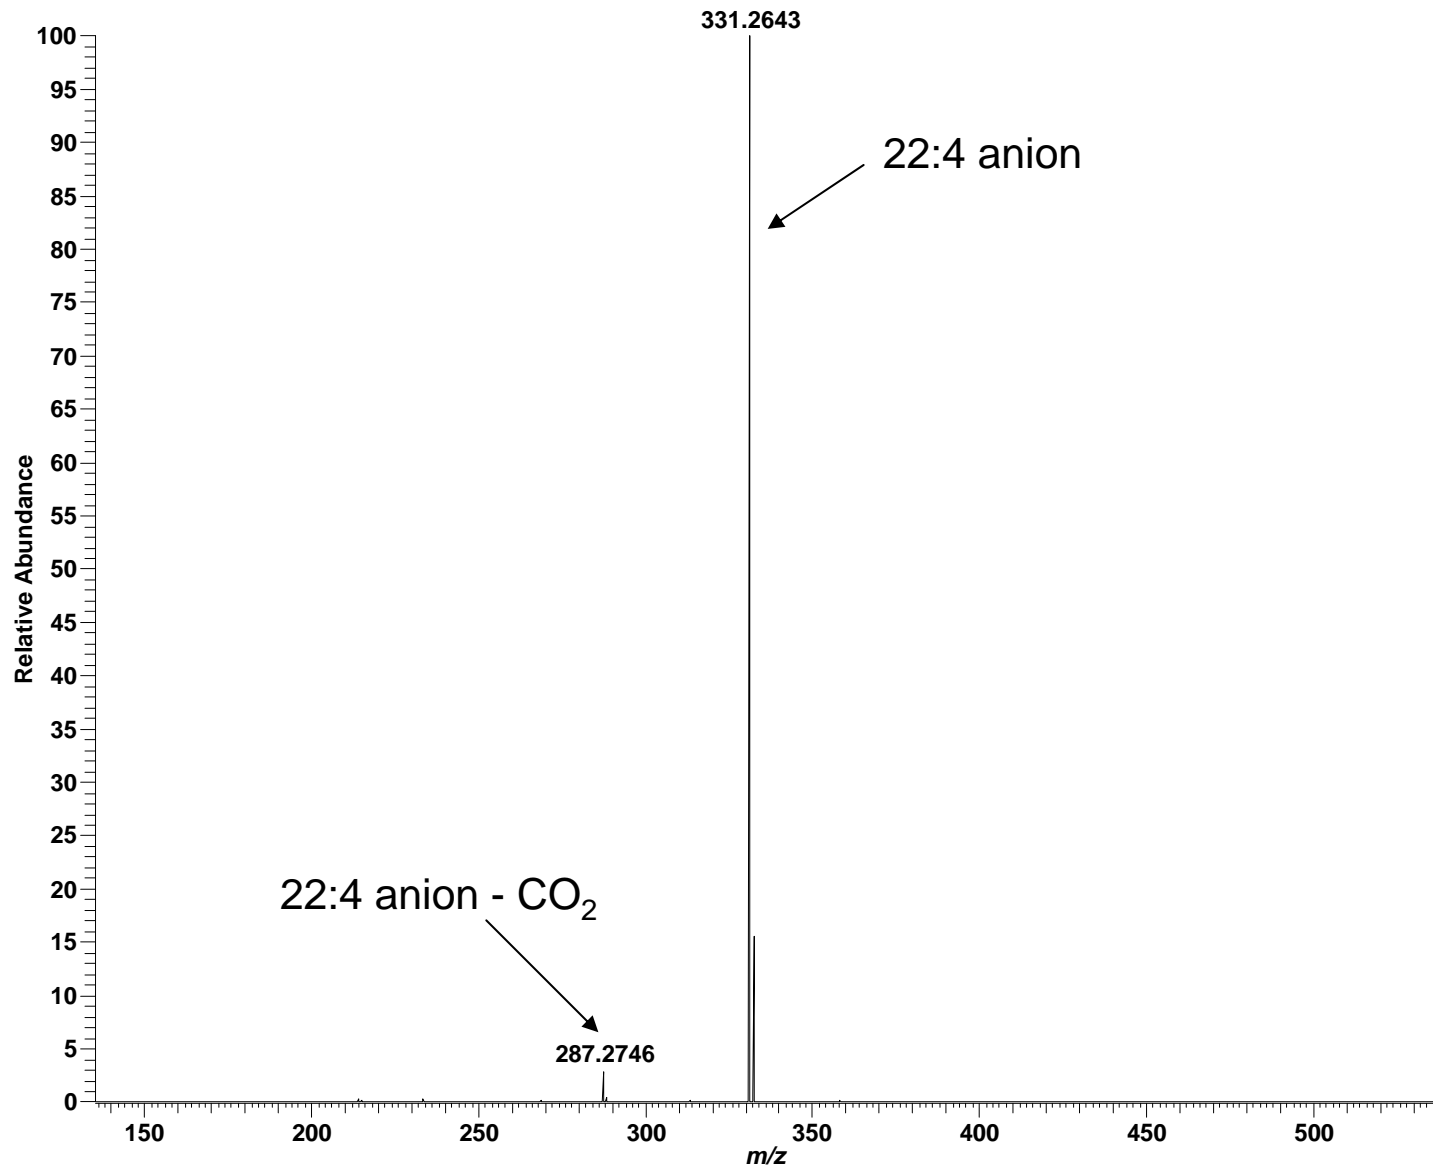

# High mass measurement accuracy MS/MS utilizing LTQ-FT

Negative ESI: LPE 16:1;  $C_{21}H_{42}NO_7P$ ; theoretical  $m/z$  450.2621, (M-H)<sup>-</sup>

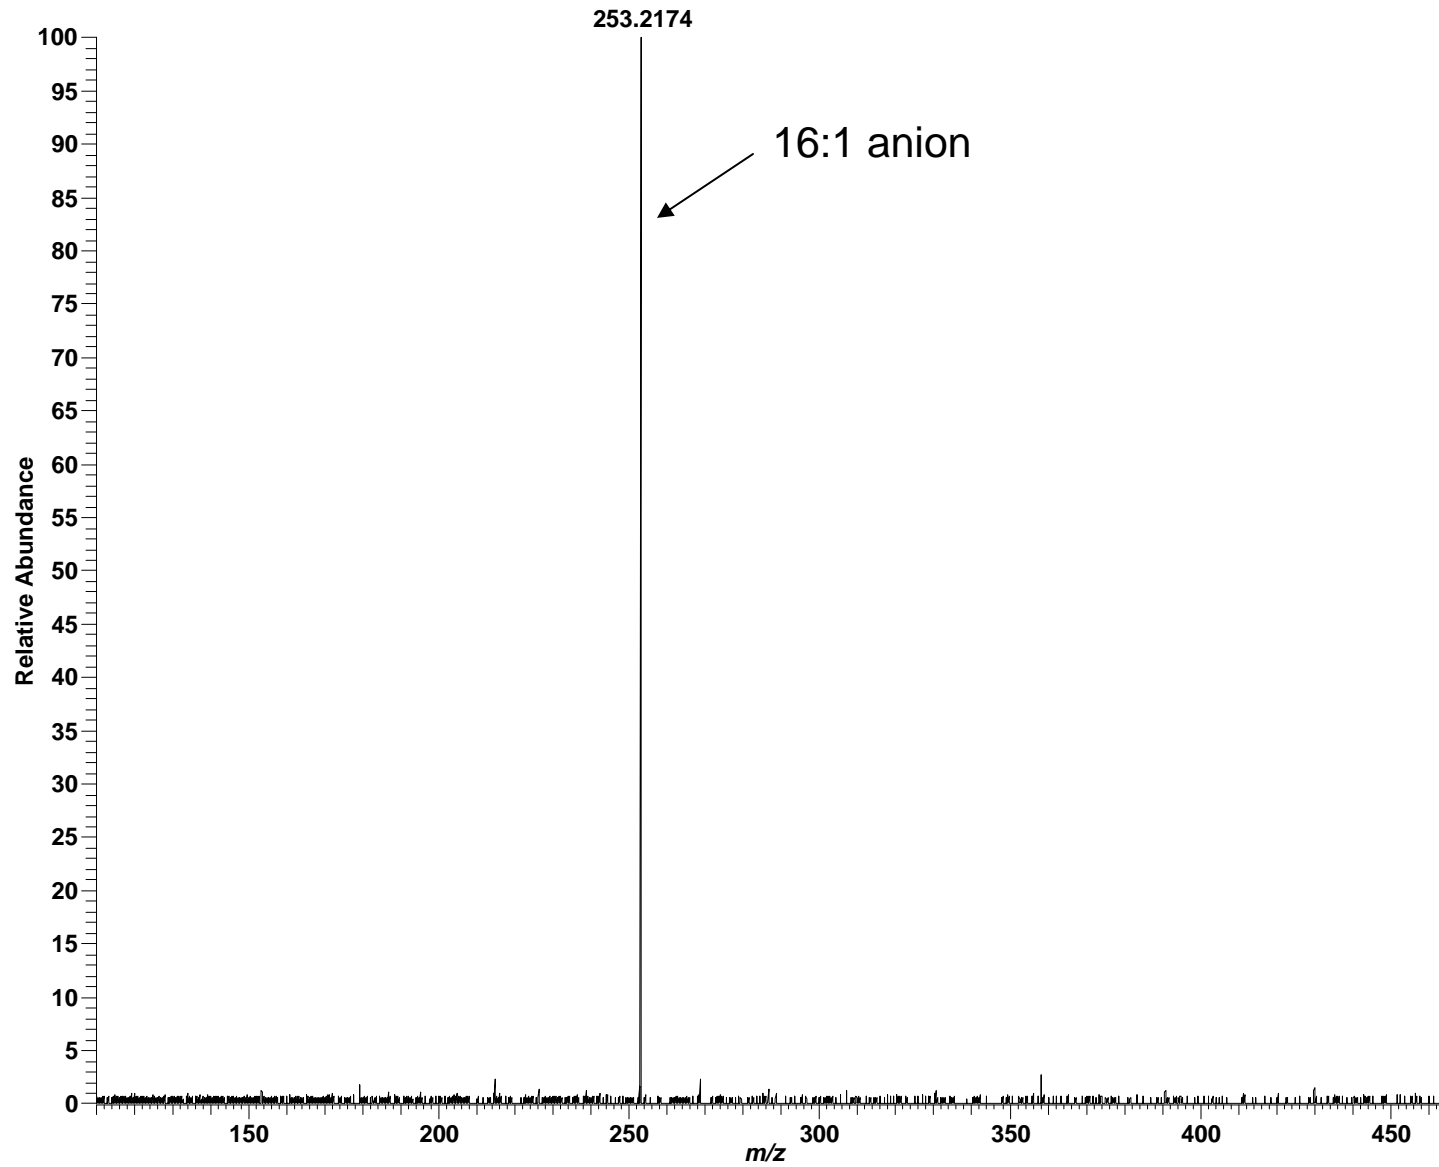



# High mass measurement accuracy MS/MS utilizing LTQ-FT

Positive ESI: LPE 16:0;  $C_{21}H_{44}NO_7P$ ; theoretical  $m/z$  454.2934,  $(M+H)^+$

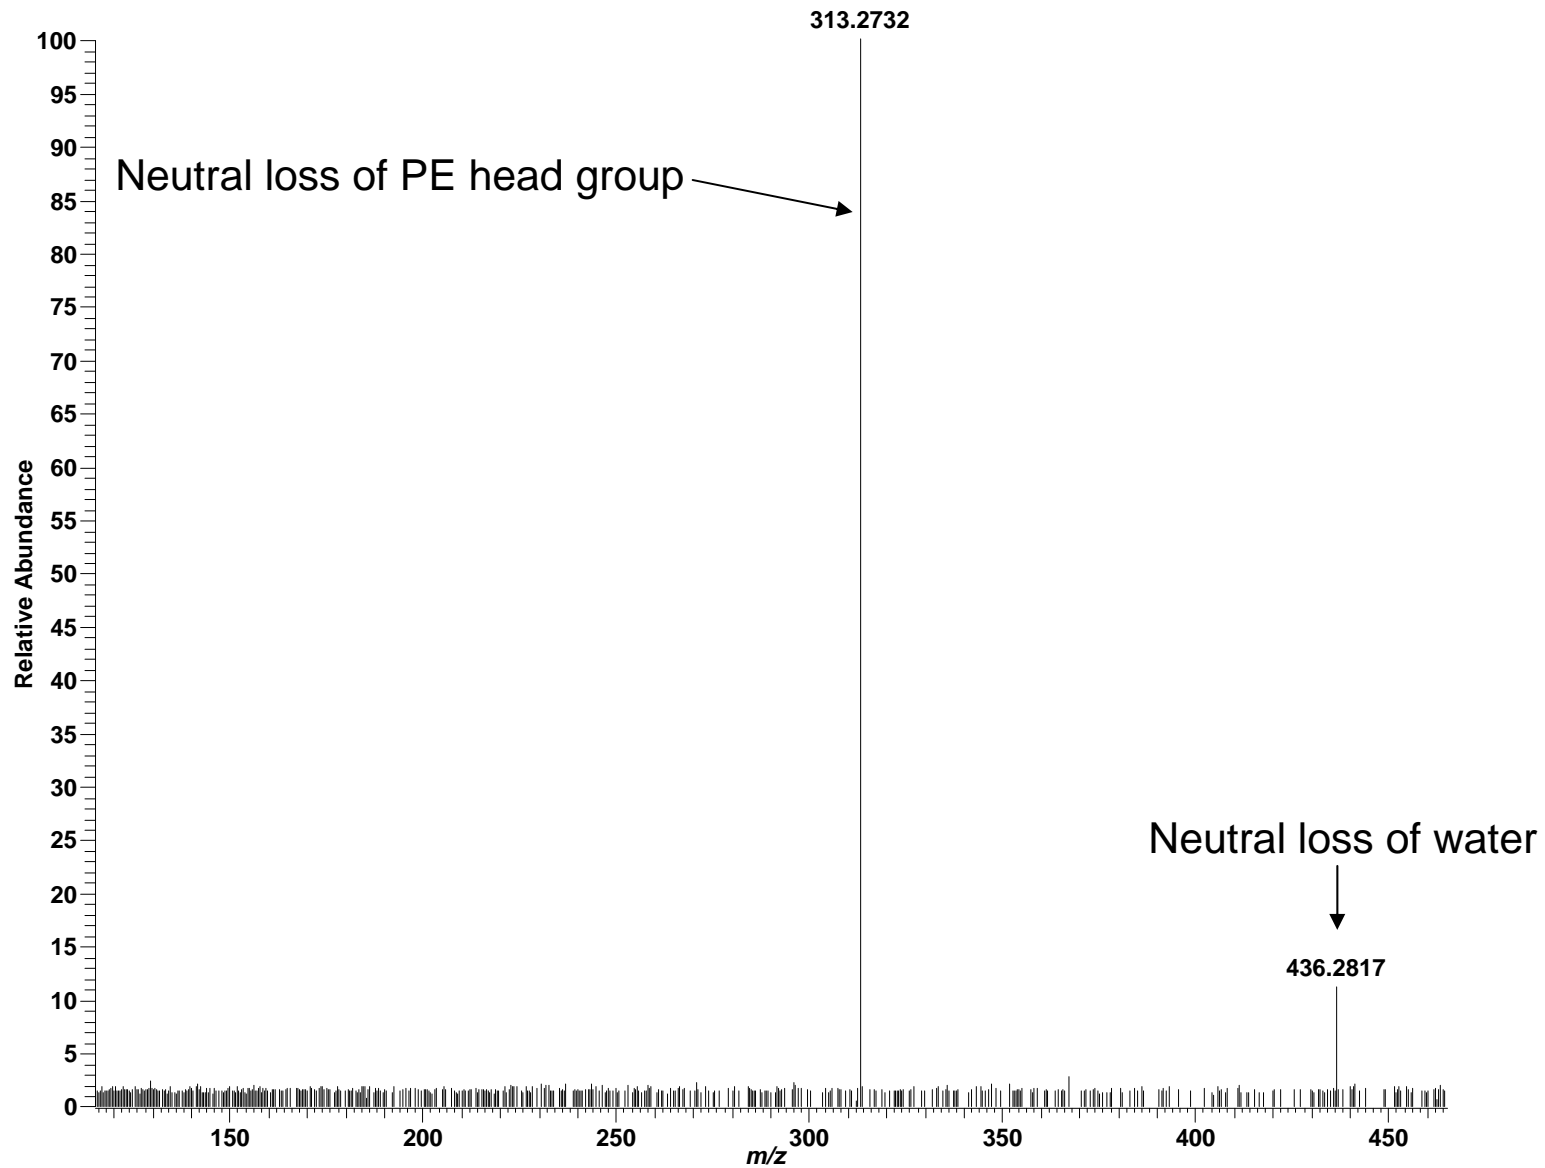

# High mass measurement accuracy MS/MS utilizing LTQ-FT

Negative ESI: LPE 16:0;  $C_{21}H_{44}NO_7P$ ; theoretical  $m/z$  452.2777, (M-H)<sup>-</sup>

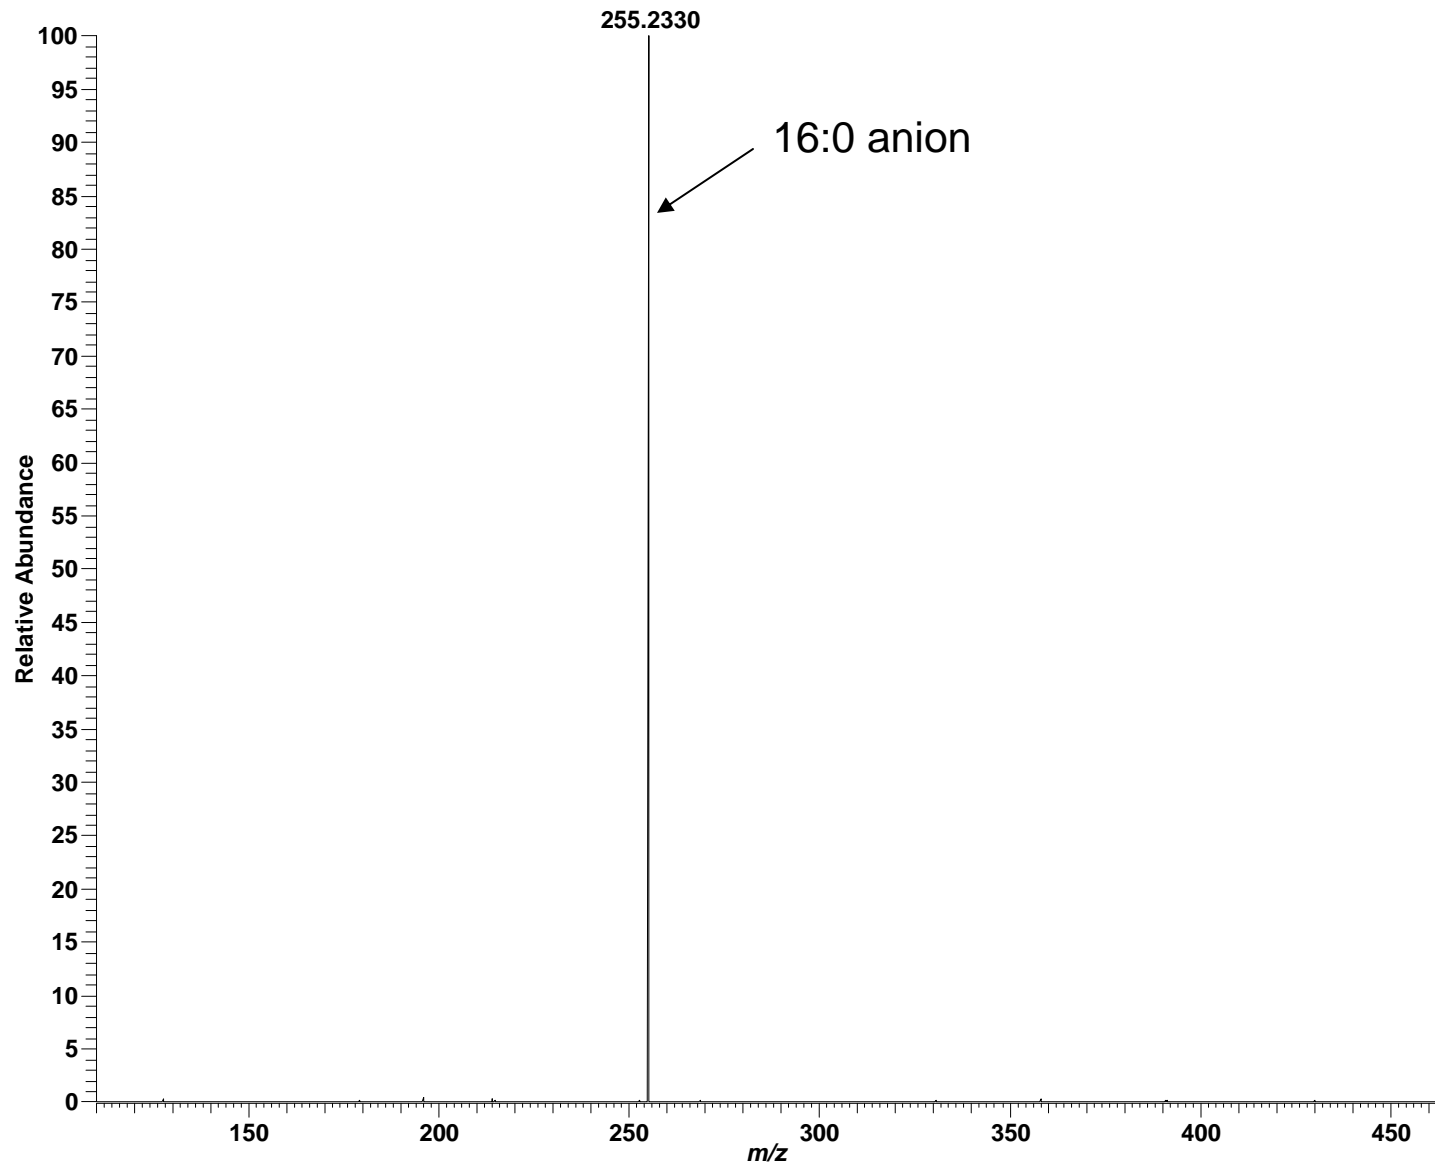

# High mass measurement accuracy MS/MS utilizing LTQ-FT

Positive ESI: LPE 18:2;  $C_{23}H_{44}NO_7P$ ; theoretical  $m/z$  478.2933,  $(M+H)^+$

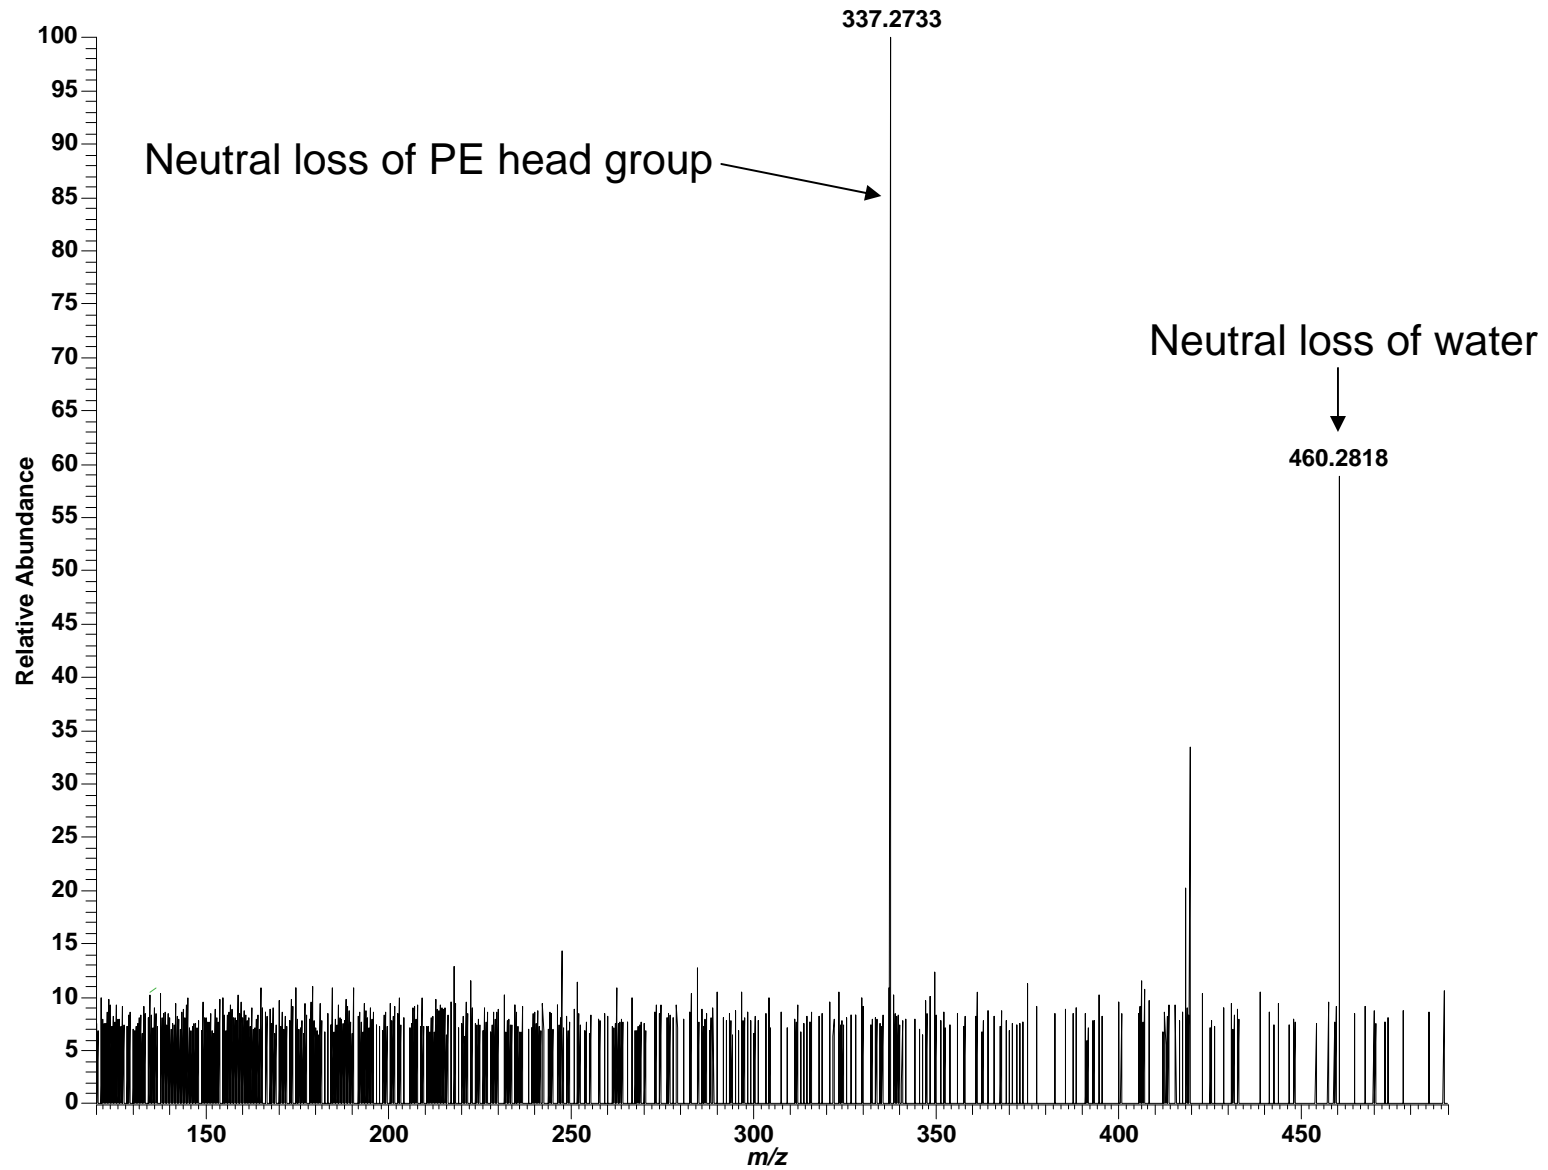

High mass measurement accuracy MS/MS utilizing LTQ-FT

Negative ESI: LPE 18:2;  $C_{23}H_{44}NO_7P$ ; theoretical  $m/z$  476.2777, (M-H)<sup>-</sup>

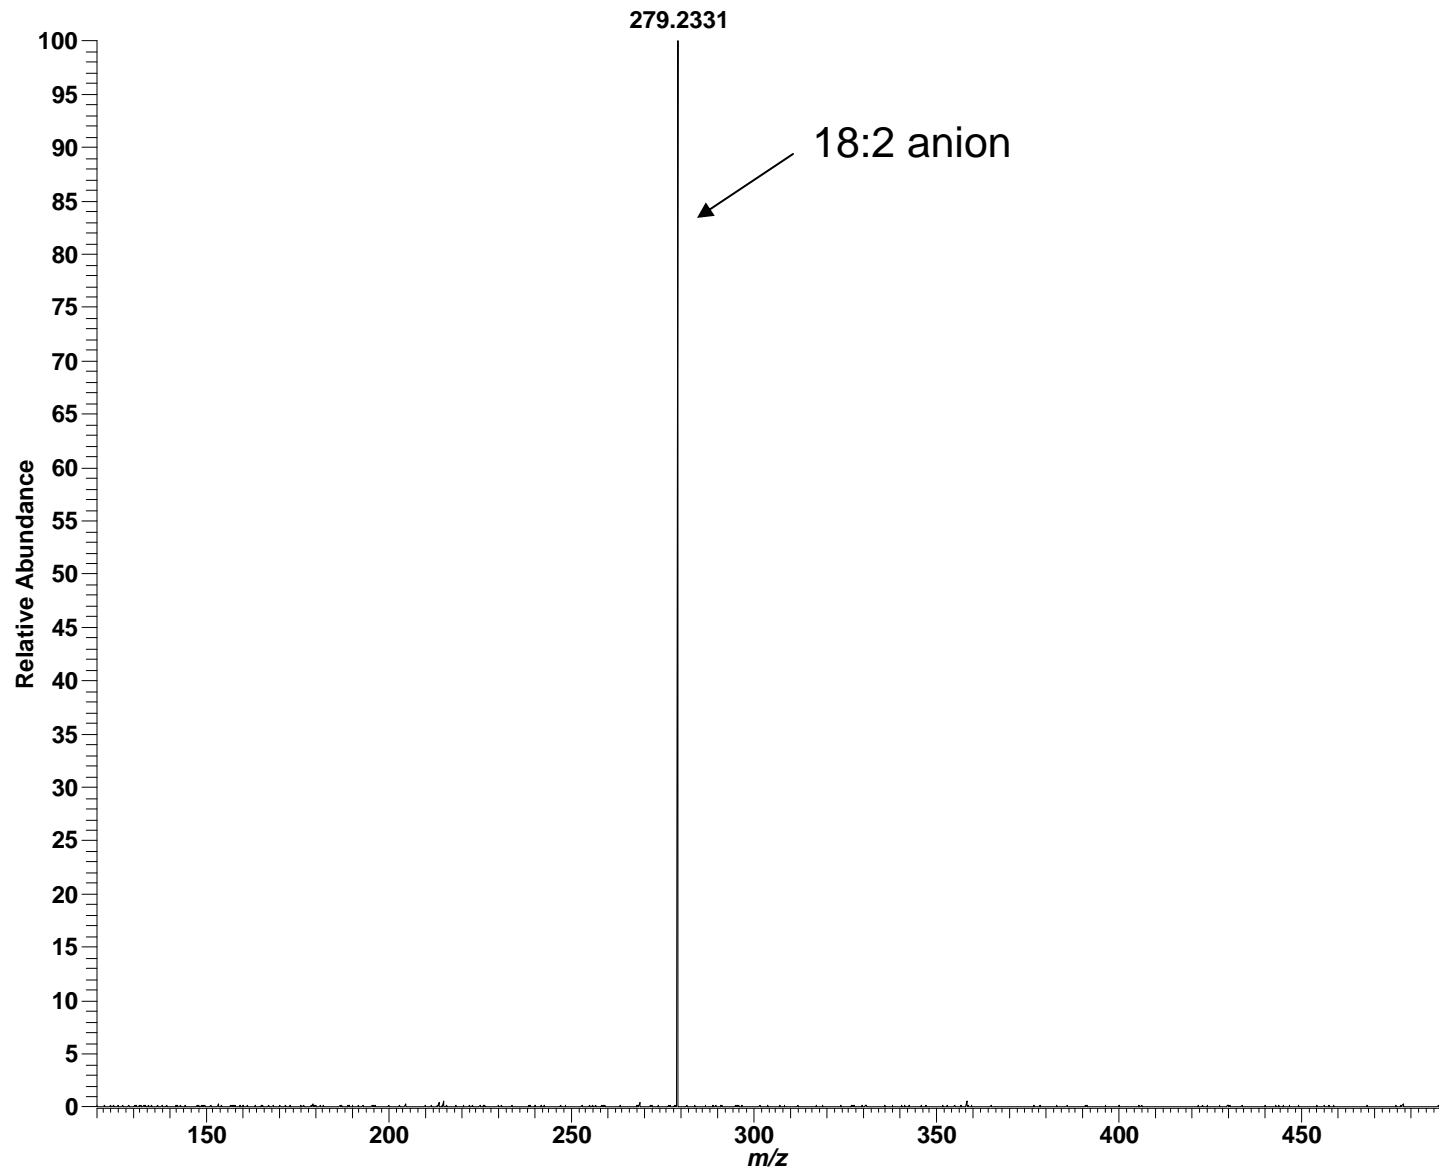

# High mass measurement accuracy MS/MS utilizing LTQ-FT

Positive ESI: LPE 18:1;  $C_{23}H_{46}NO_7P$ ; theoretical  $m/z$  480.3090,  $(M+H)^+$

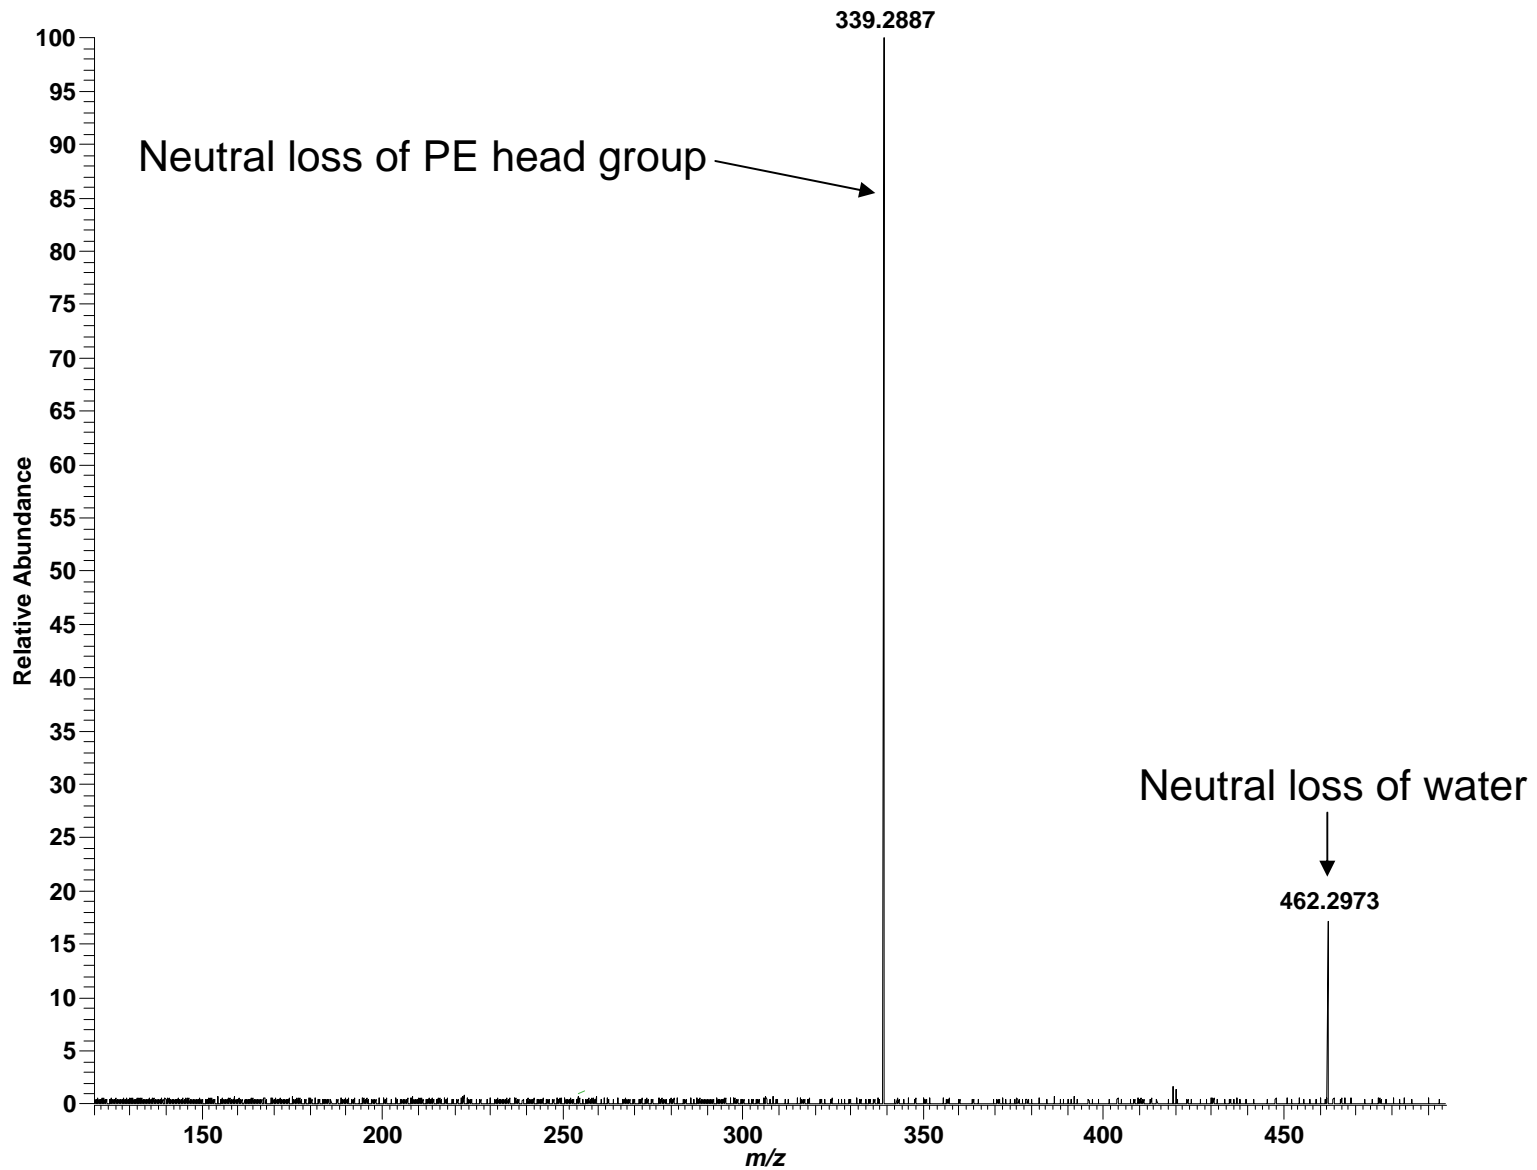

High mass measurement accuracy MS/MS utilizing LTQ-FT

Negative ESI: LPE 18:1;  $C_{23}H_{46}NO_7P$ ; theoretical  $m/z$  478.2933,  $(M-H)^-$

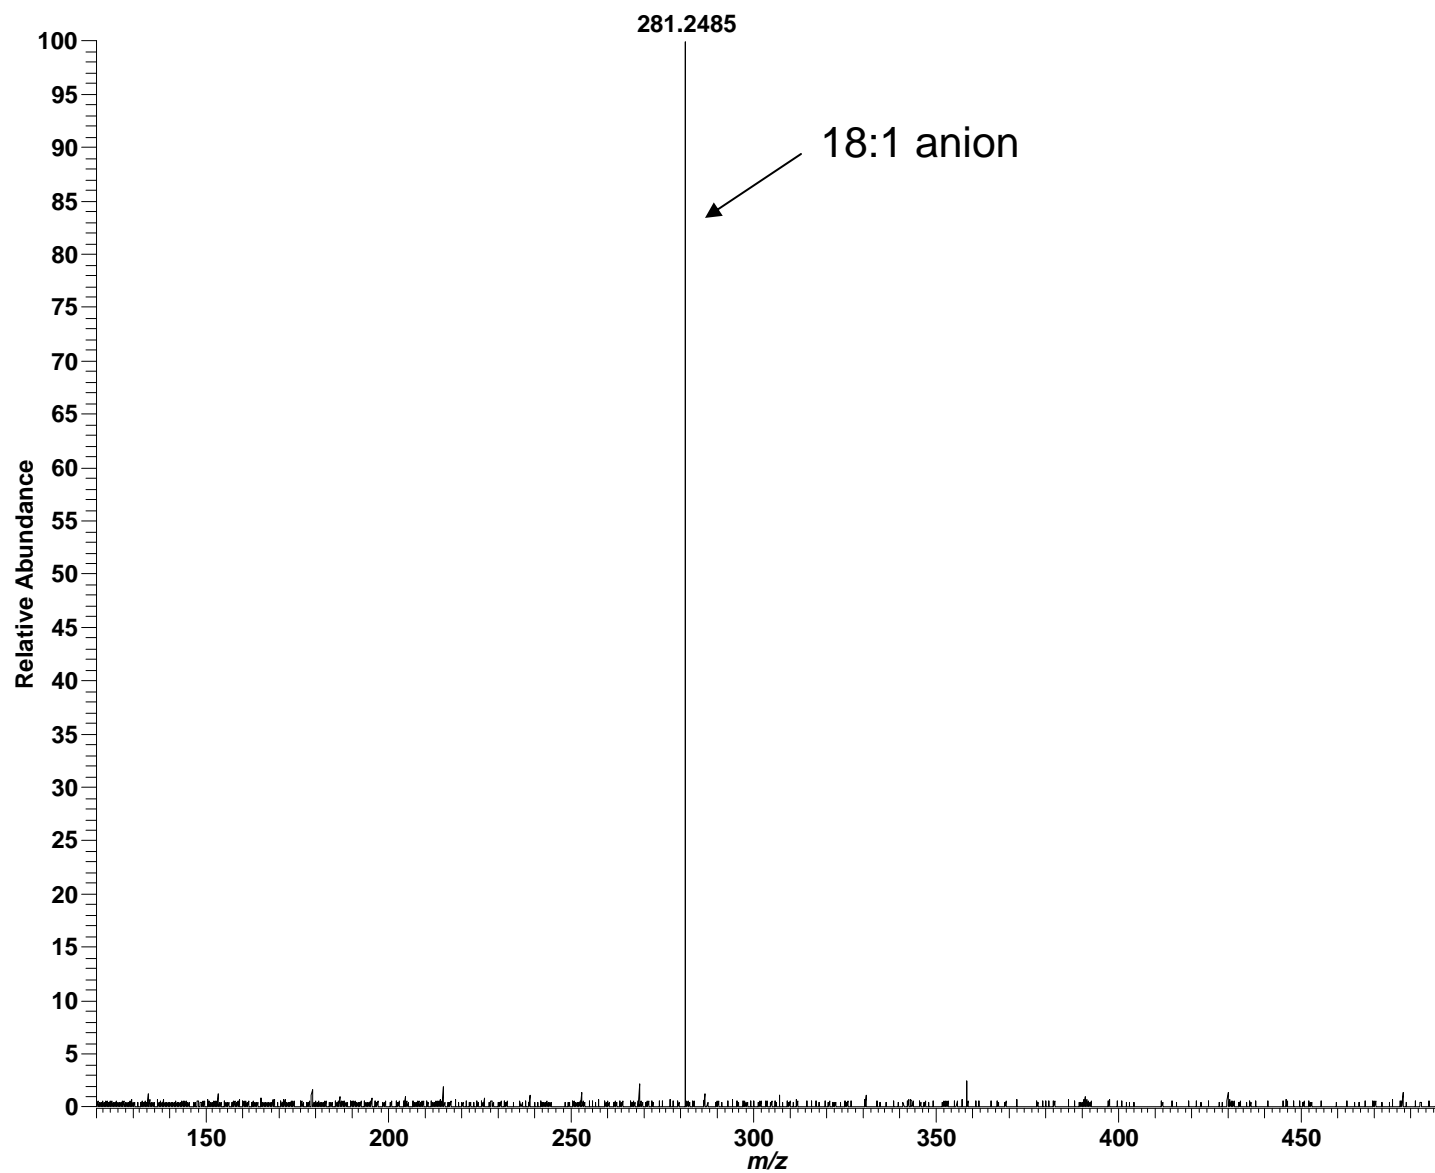

# High mass measurement accuracy MS/MS utilizing LTQ-FT

Positive ESI: LPE 18:0;  $C_{23}H_{48}NO_7P$ ; theoretical  $m/z$  482.3246,  $(M+H)^+$

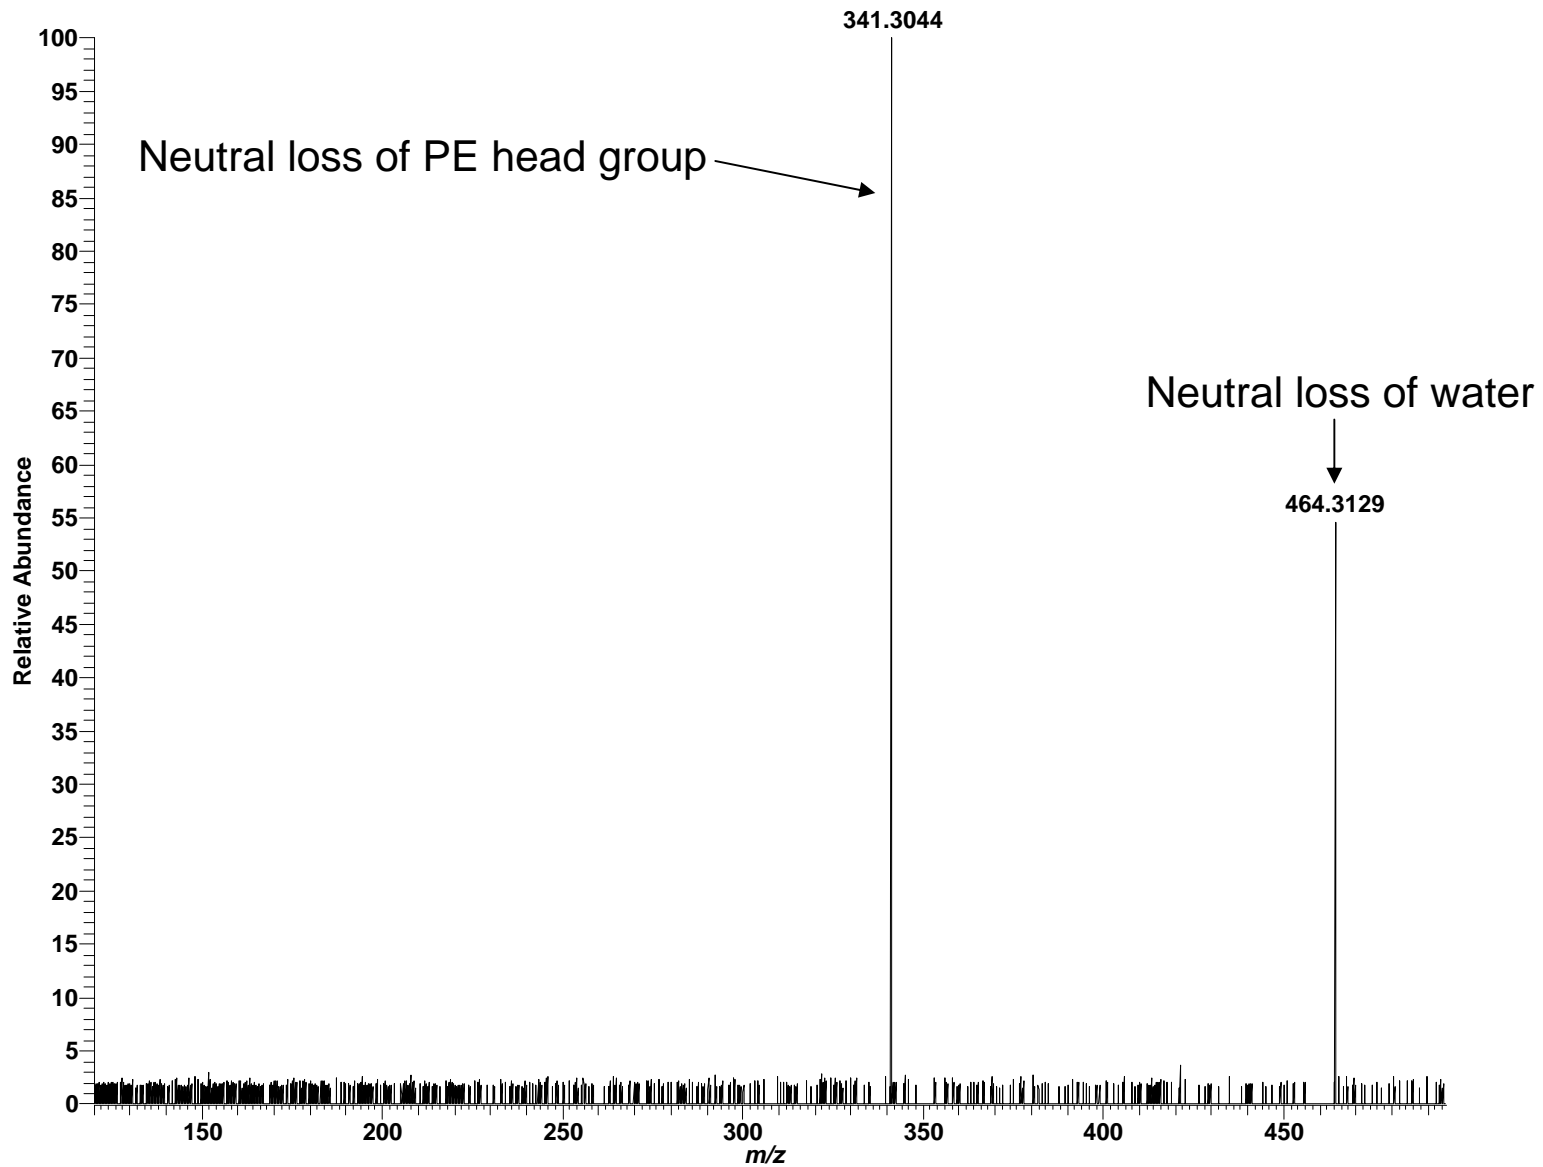

High mass measurement accuracy MS/MS utilizing LTQ-FT

Negative ESI: LPE 18:0;  $C_{23}H_{48}NO_7P$ ; theoretical  $m/z$  480.3090, (M-H)<sup>-</sup>

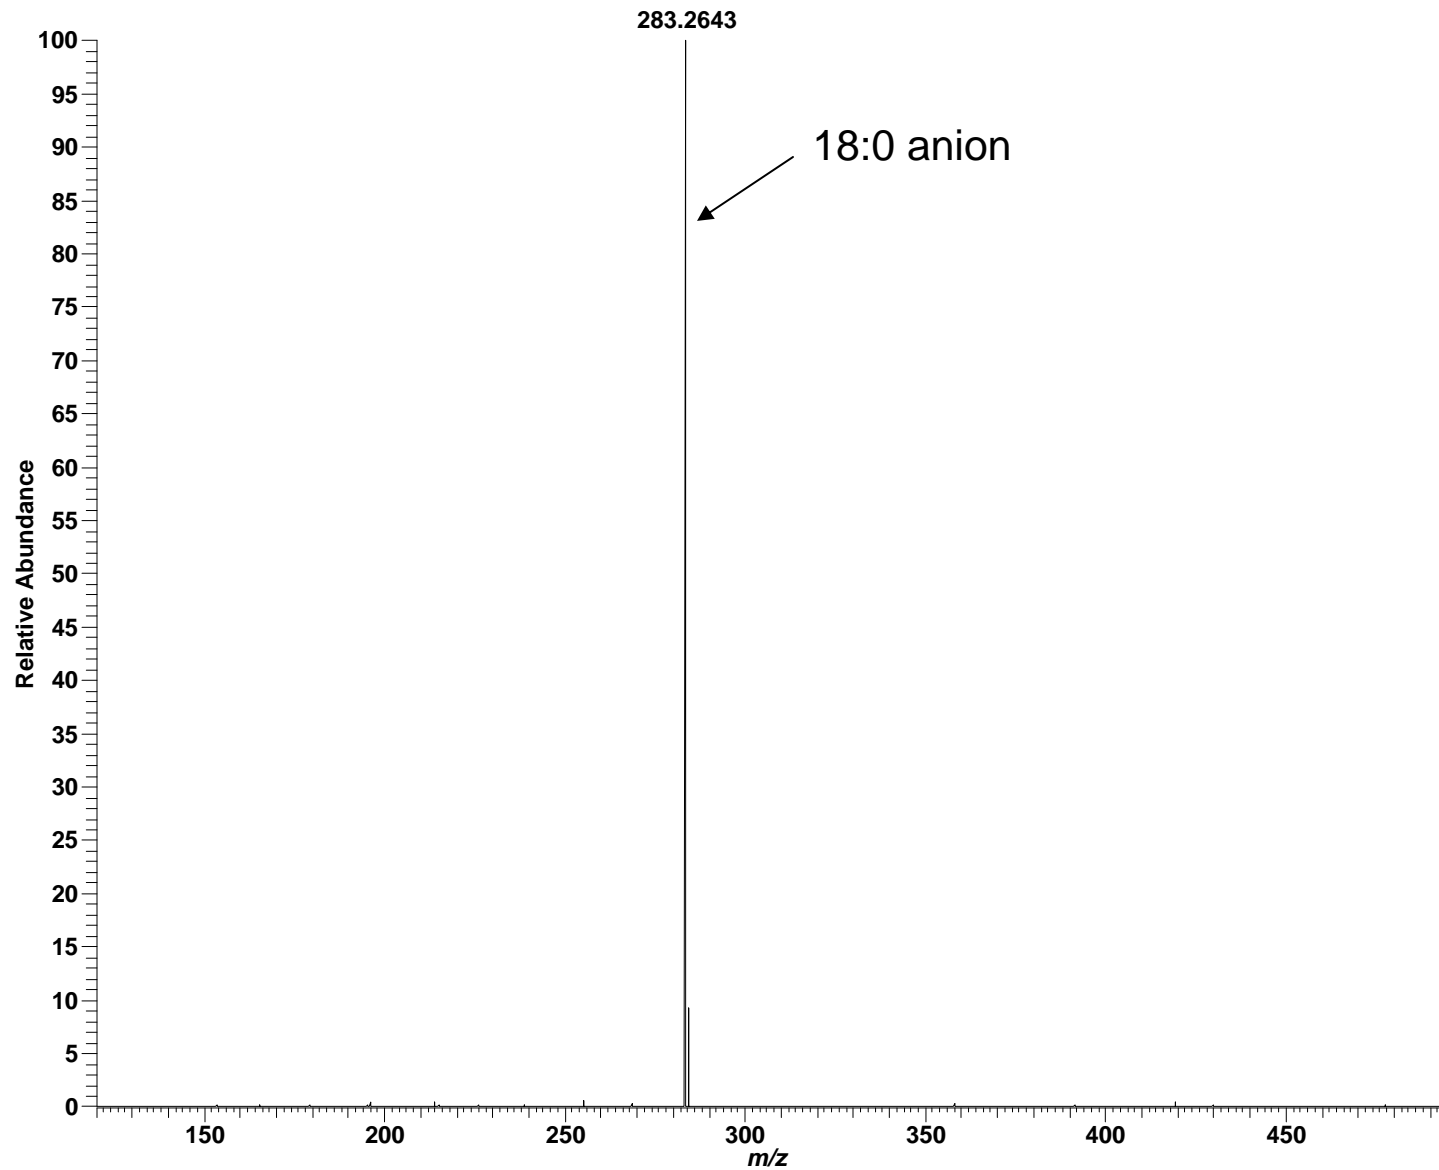



# High mass measurement accuracy MS/MS utilizing LTQ-FT

Positive ESI: PE 16:0/20:4;  $C_{41}H_{74}NO_8P$ ; theoretical  $m/z$  740.5230,  $(M+H)^+$

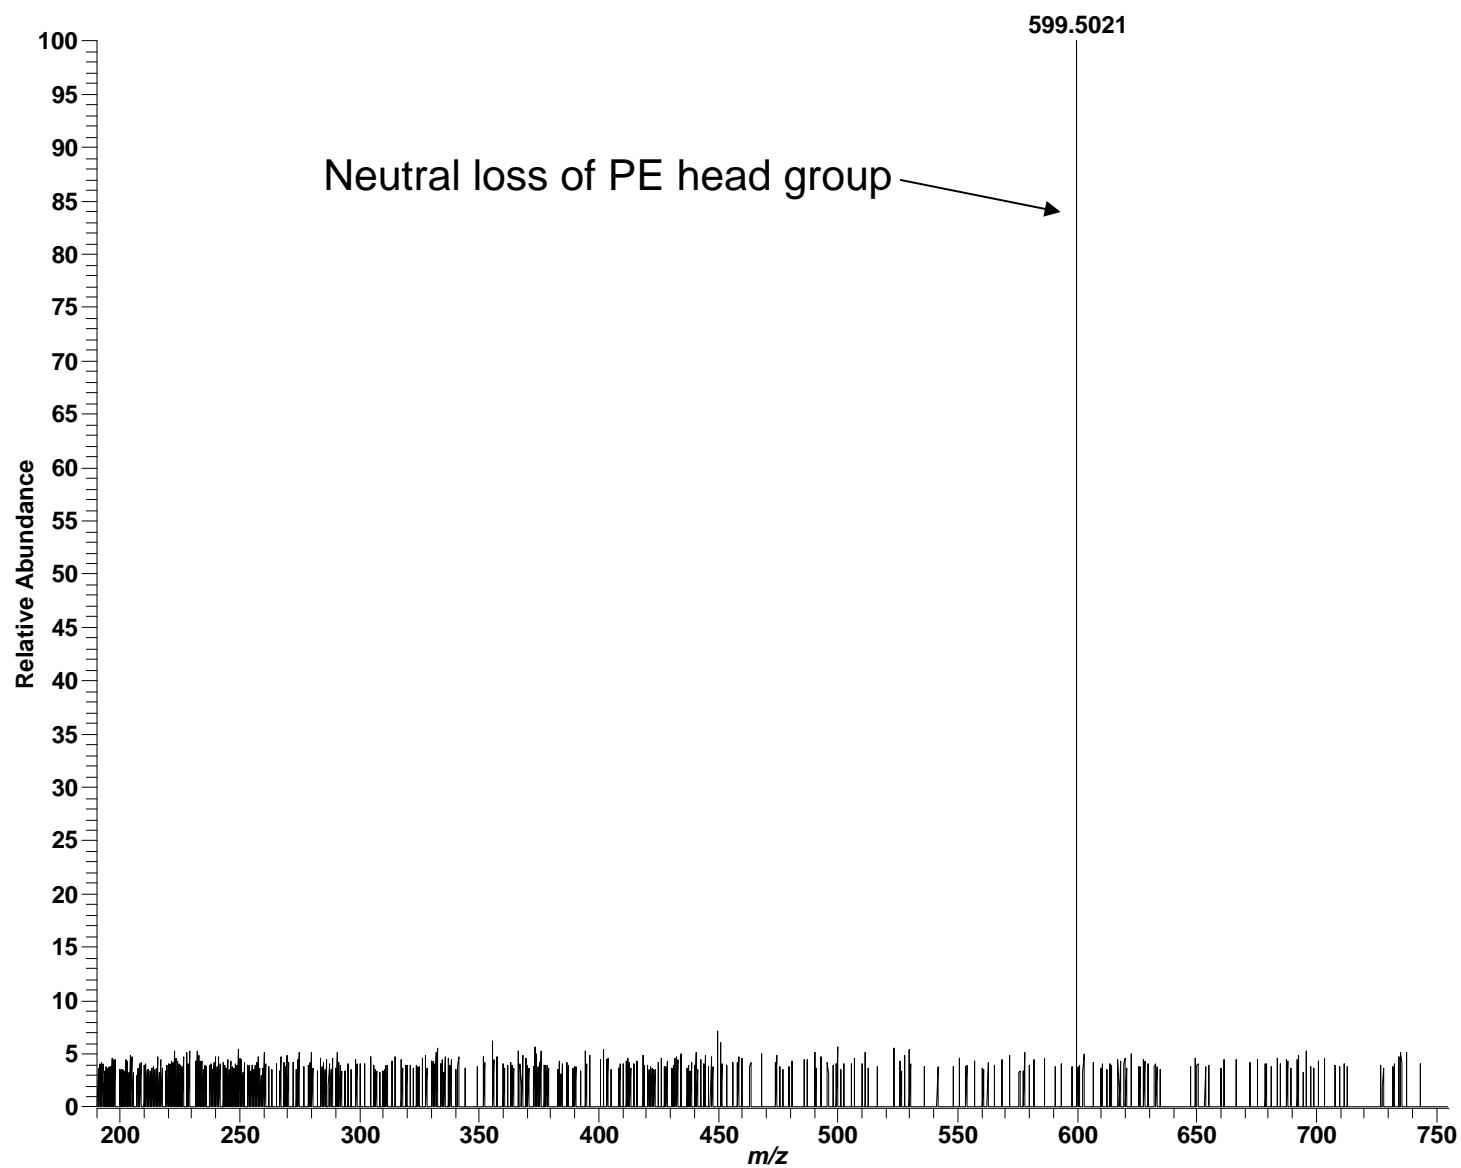

# Low mass measurement accuracy MS/MS utilizing LTQ

Negative ESI: PE 16:0/20:4;  $C_{41}H_{74}NO_8P$ ; theoretical  $m/z$  738.5, (M-H)<sup>-</sup>

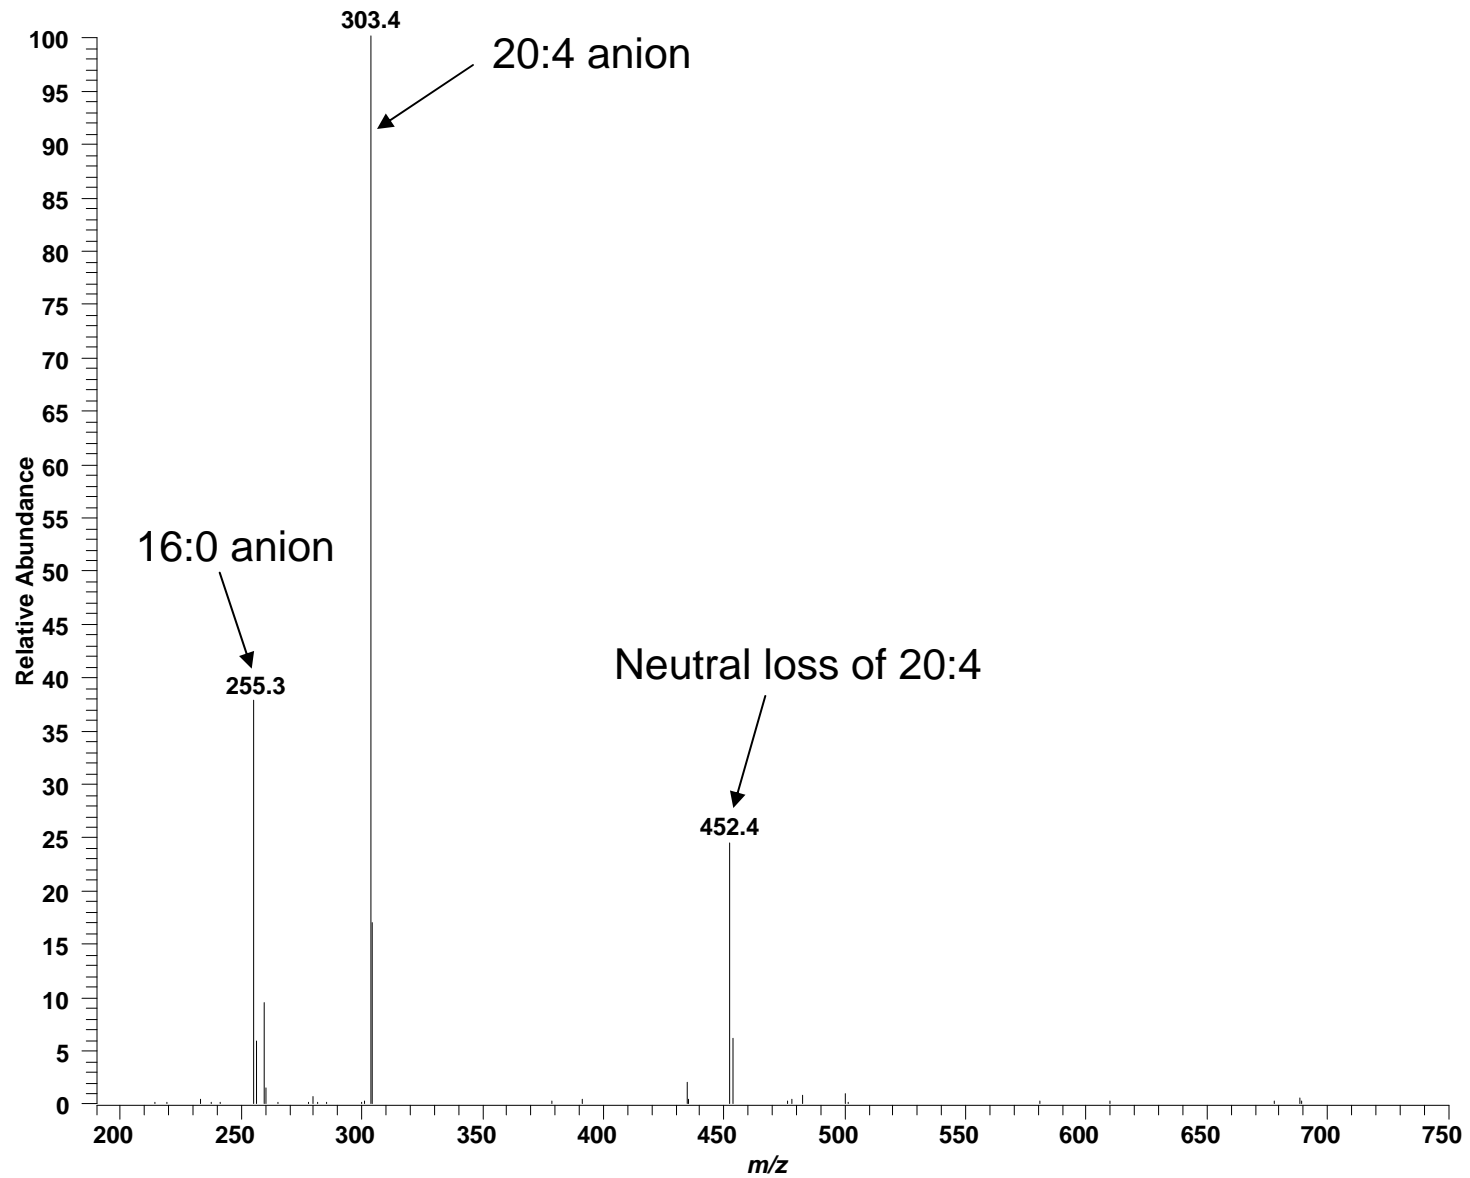

## High mass measurement accuracy MS/MS utilizing LTQ-FT

Positive ESI: PE 16:0/20:3 or 18:2/18:1;  $C_{41}H_{76}NO_8P$ ; theoretical  $m/z$  742.5387,  $(M+H)^+$

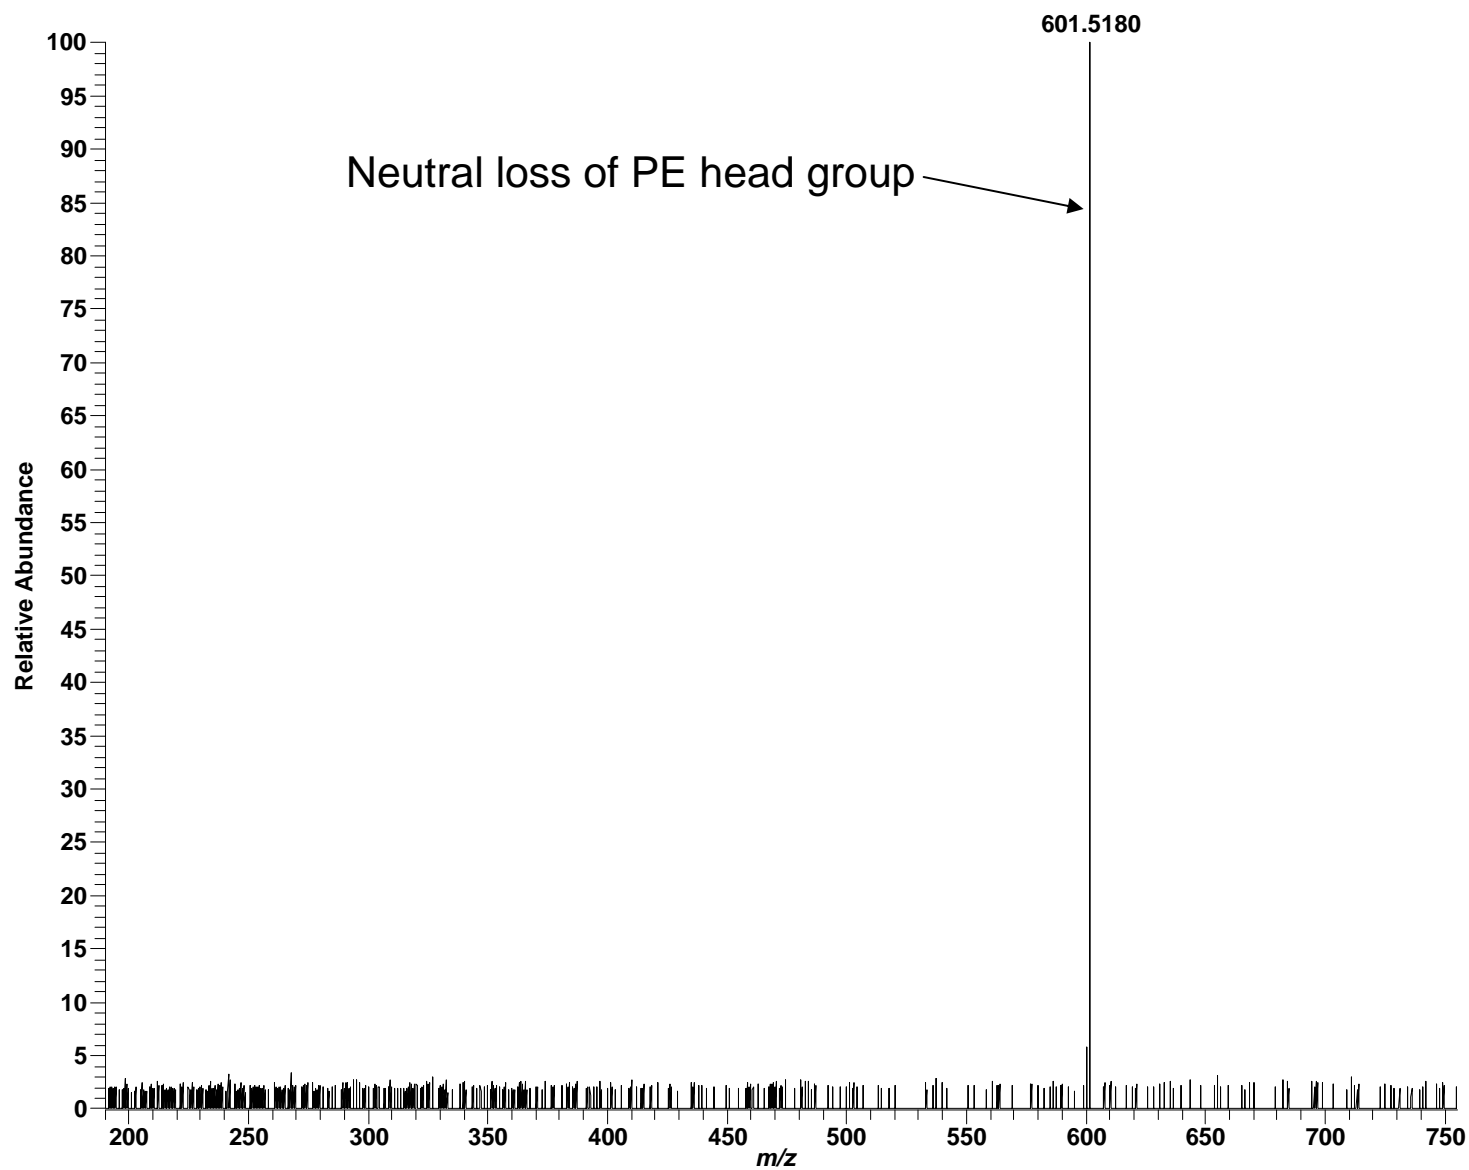

## Low mass measurement accuracy MS/MS utilizing LTQ

Negative ESI: PE 16:0/20:3 or 18:2/18:1;  $C_{41}H_{76}NO_8P$ ; theoretical  $m/z$  740.5, (M-H)<sup>-</sup>

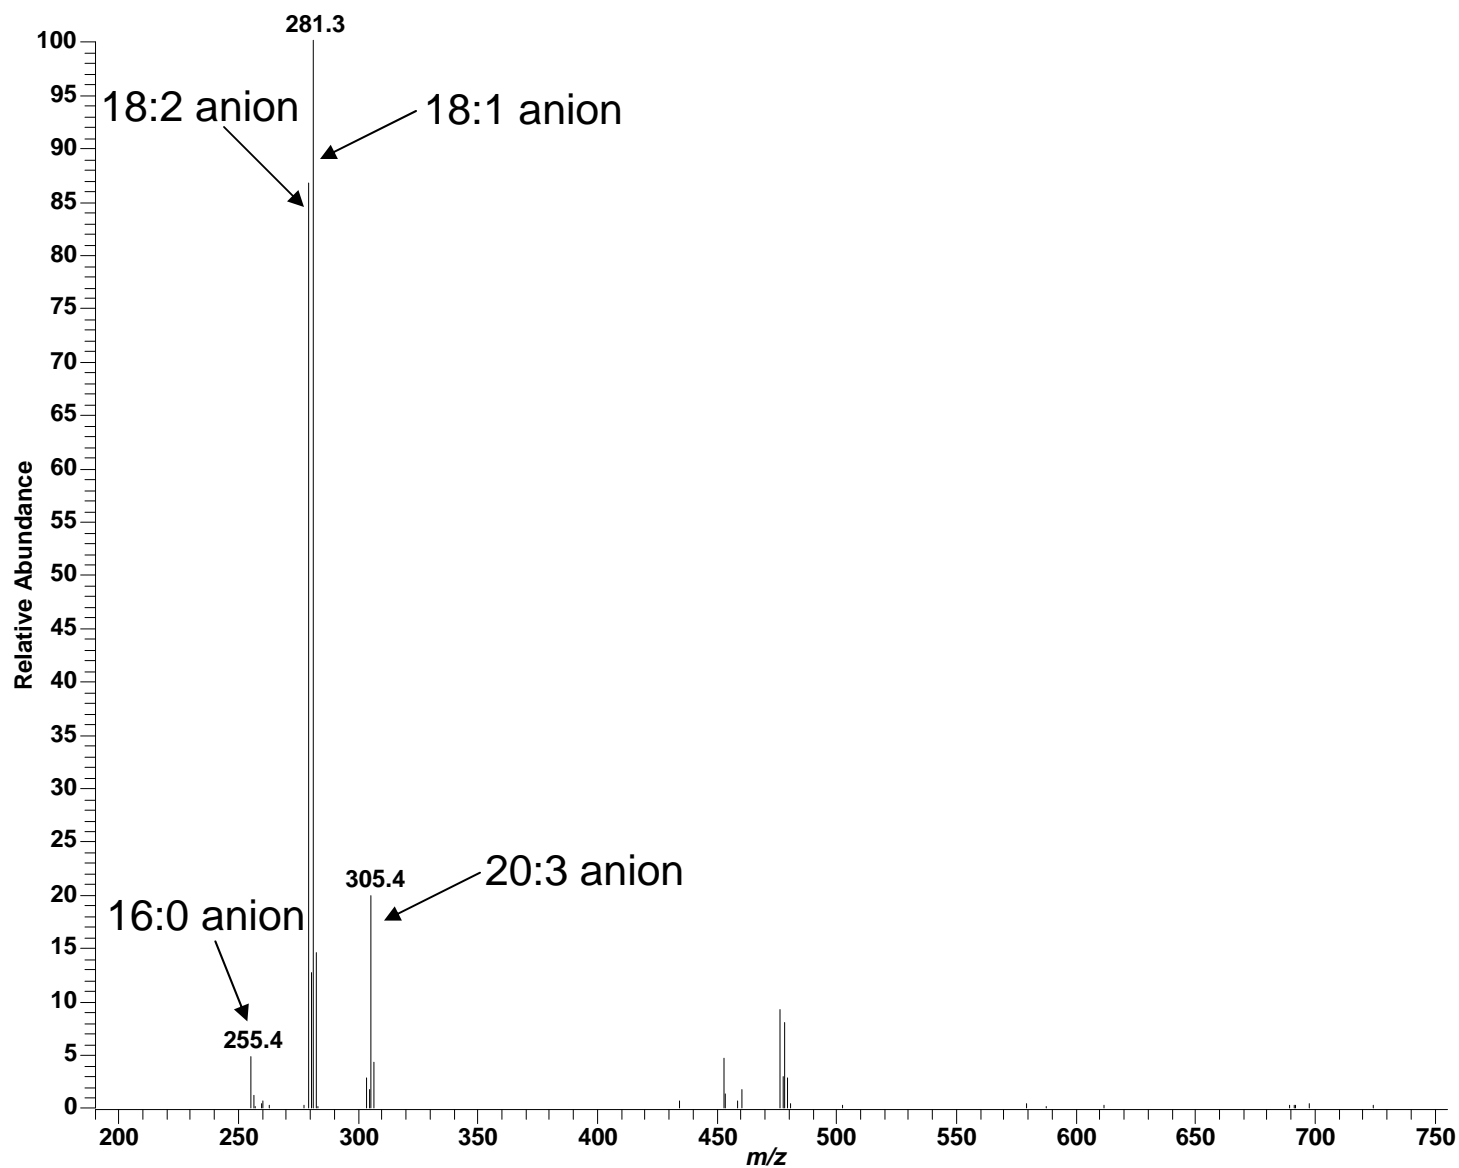

# High mass measurement accuracy MS/MS utilizing LTQ-FT

Positive ESI: LPE 16:0/20:2 or 18:1/18:1;  $C_{41}H_{78}NO_8P$ ; theoretical  $m/z$  744.5543,  $(M+H)^+$

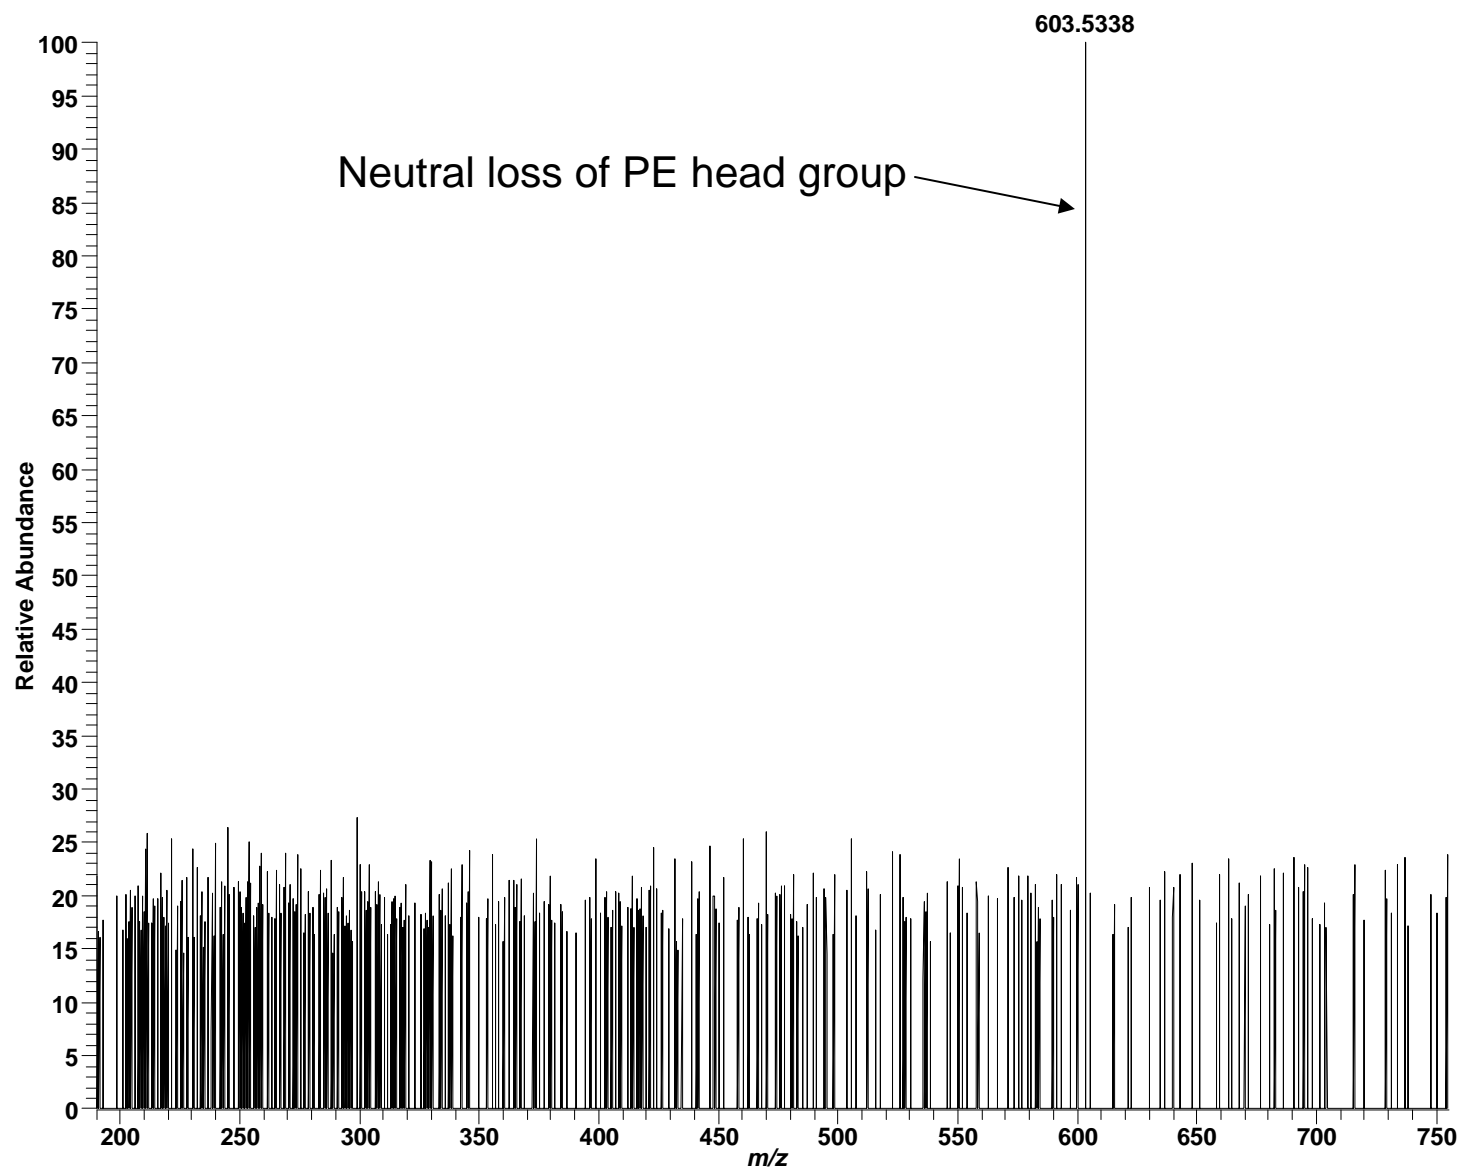

# Low mass measurement accuracy MS/MS utilizing LTQ

Negative ESI: PE 16:0/20:2 or 18:1/18:1;  $C_{41}H_{78}NO_8P$ ; theoretical  $m/z$  742.5, (M-H)<sup>-</sup>

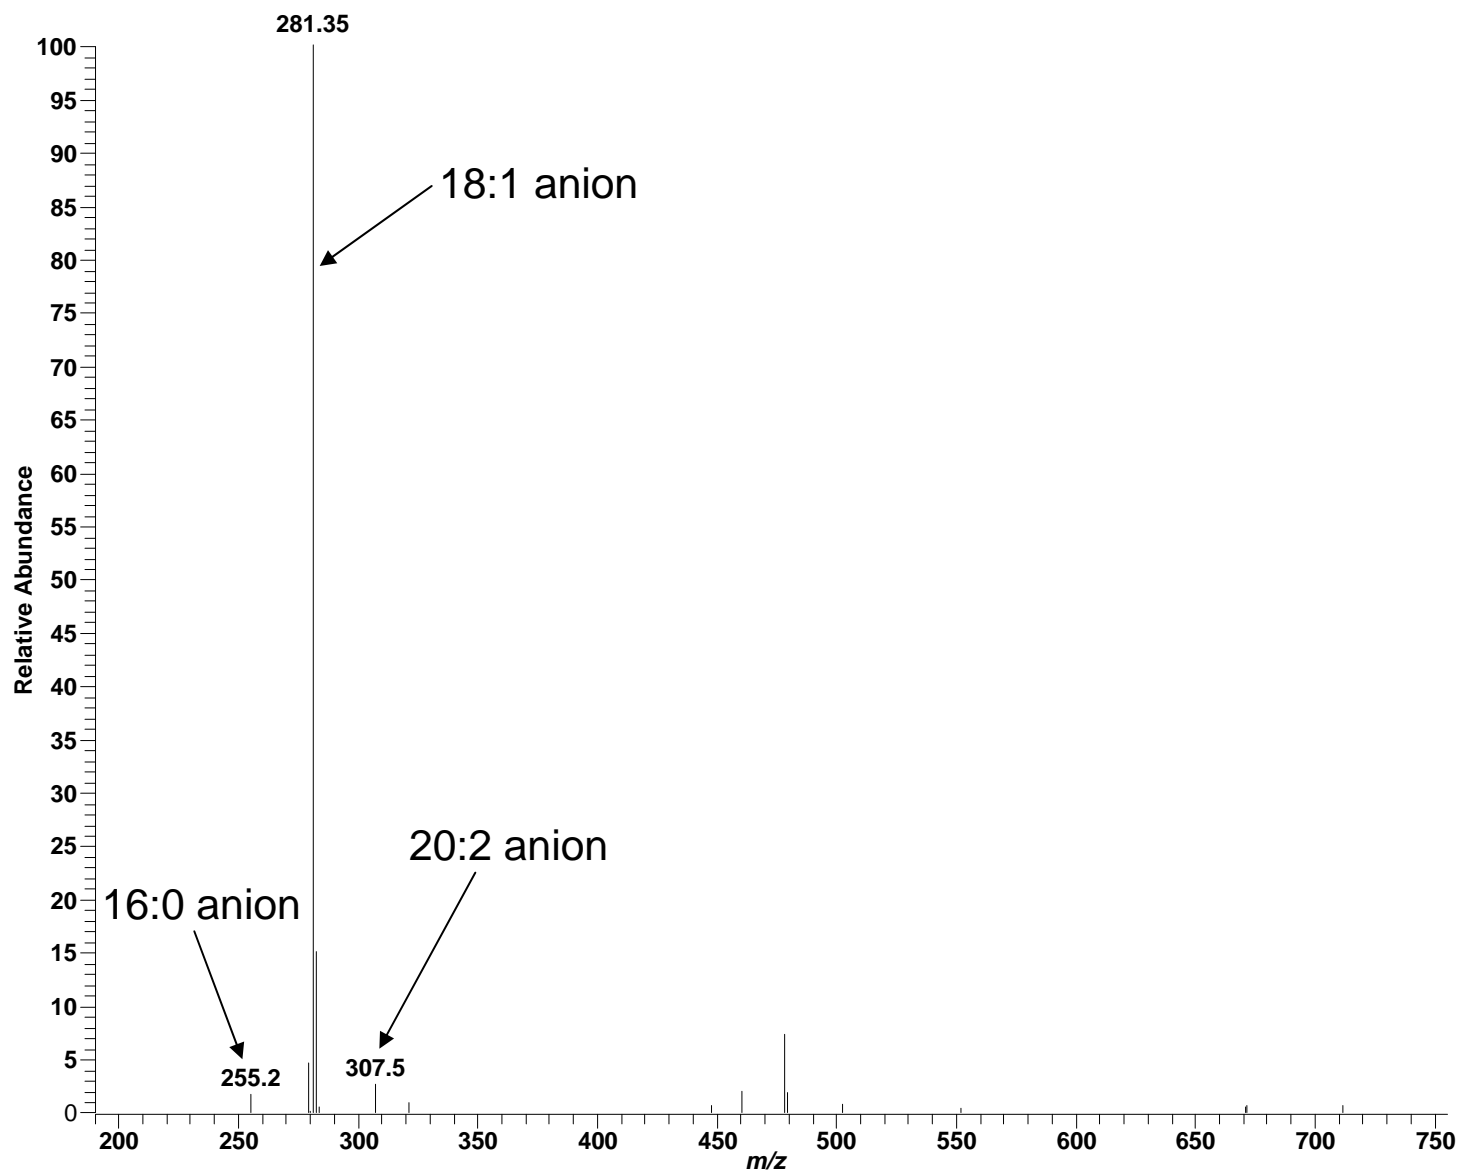

# Low mass measurement accuracy MS/MS utilizing LTQ

Negative ESI: PE 18:1/20:4 or 16:0/22:5;  $C_{43}H_{76}NO_8P$ ; theoretical  $m/z$  764.5, (M-H)<sup>-</sup>

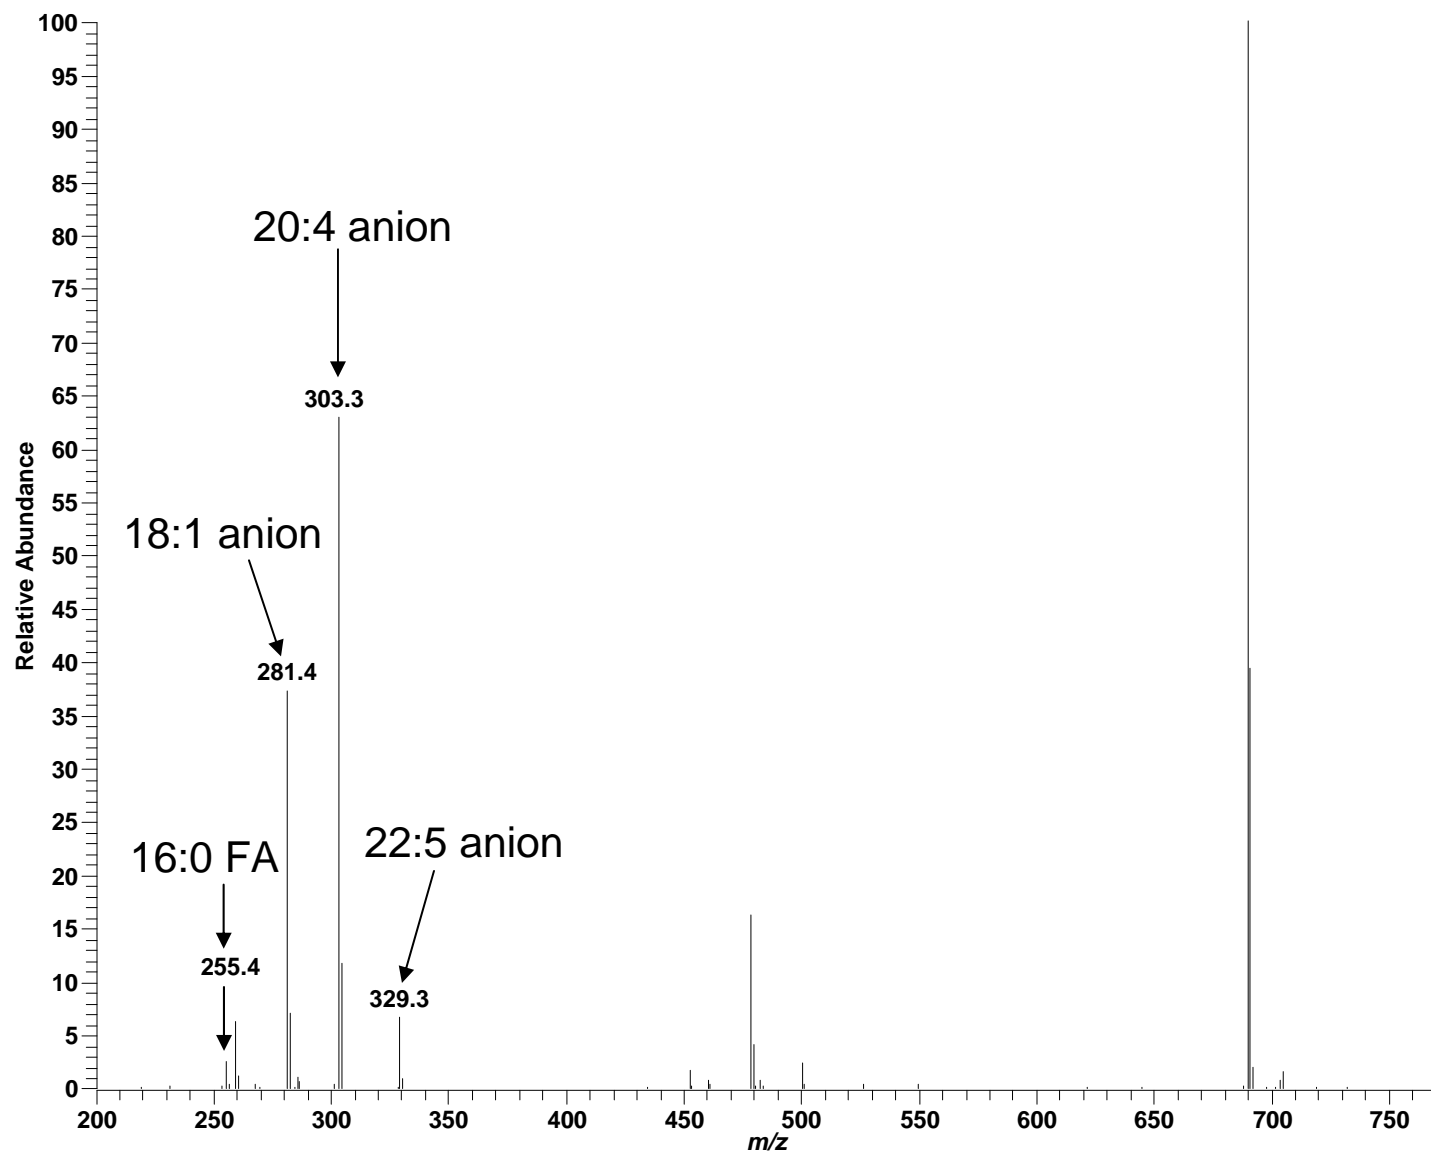

# High mass measurement accuracy MS/MS utilizing LTQ-FT

Positive ESI: PE 18:1/20:3 or 16:0/22:4;  $C_{43}H_{78}NO_8P$ ; theoretical  $m/z$  768.5543,  $(M+H)^+$

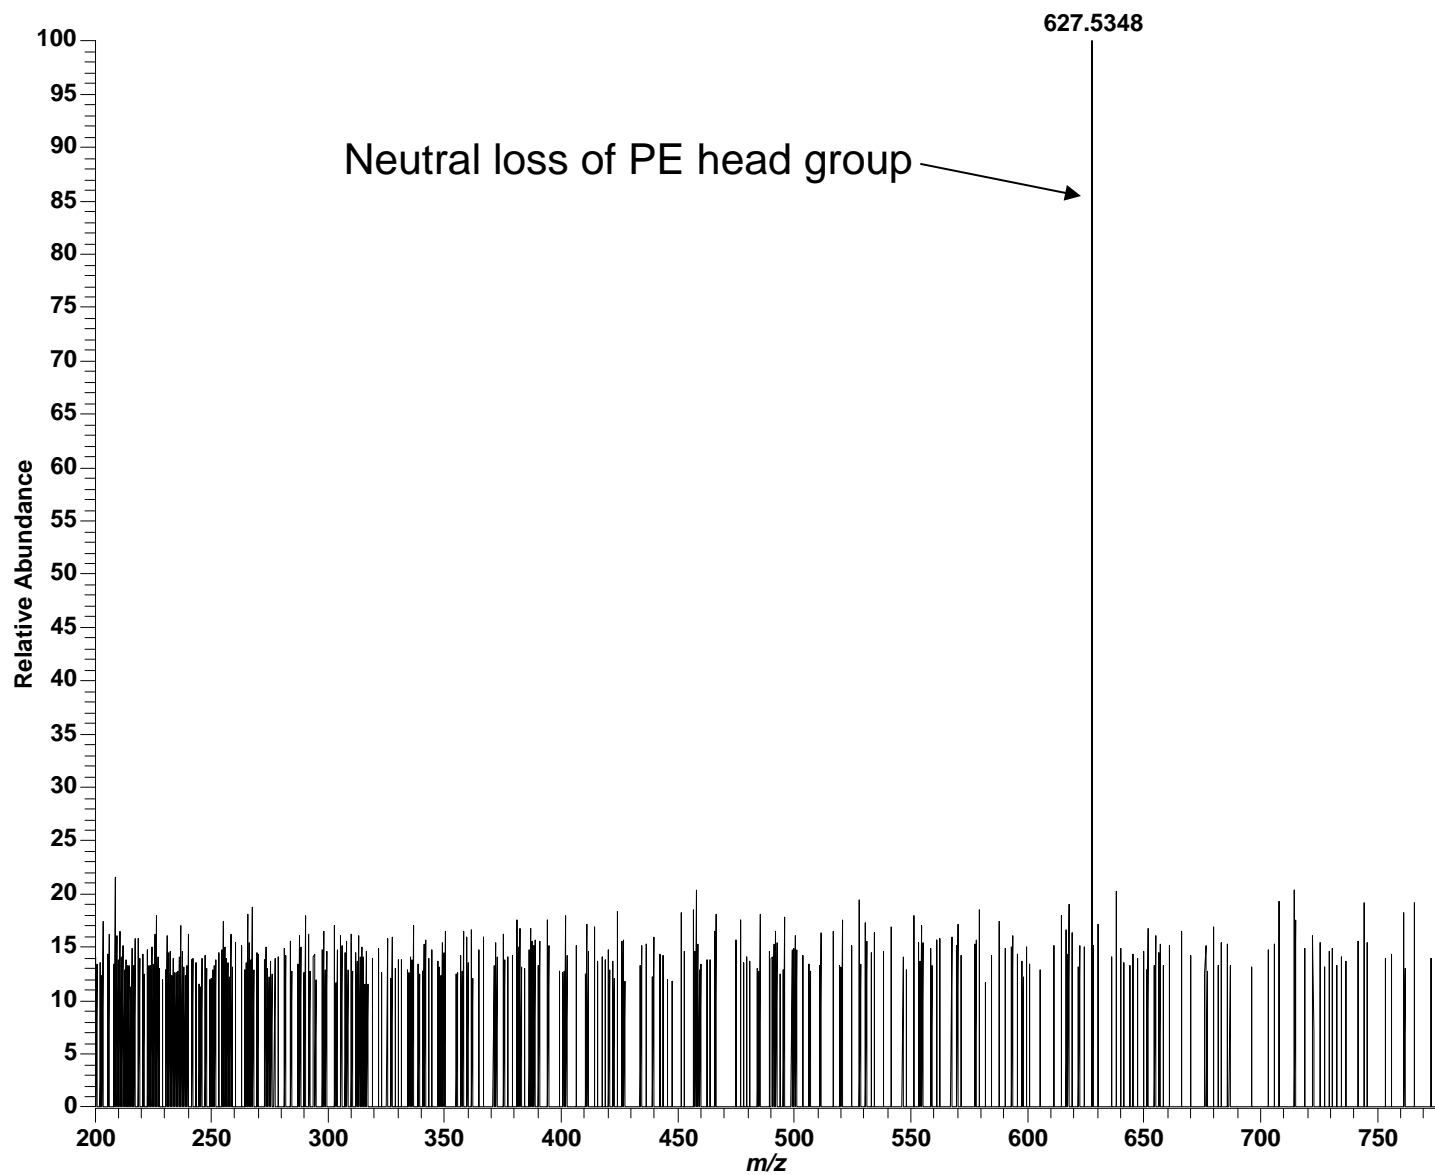



# Low mass measurement accuracy MS/MS utilizing LTQ

Negative ESI: PE 18:1/20:3 or 16:0/22:4;  $C_{43}H_{78}NO_8P$ ; theoretical  $m/z$  766.5, (M-H)<sup>-</sup>

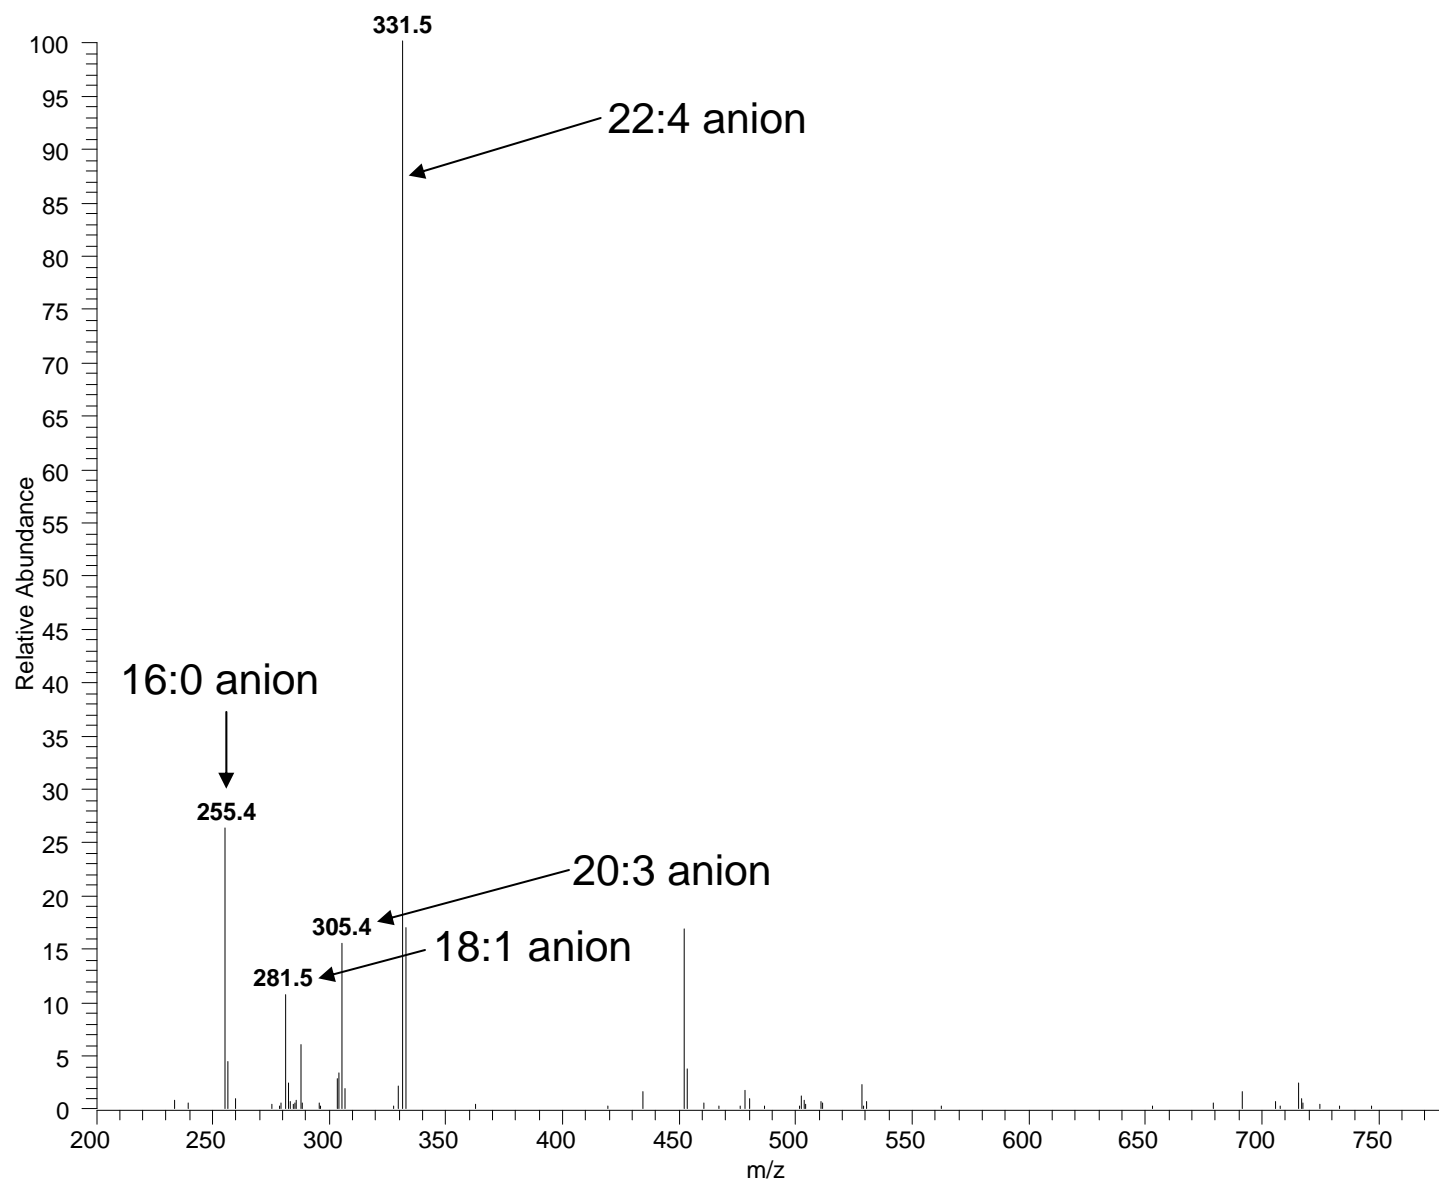

# Low mass measurement accuracy MS/MS utilizing LTQ

Negative ESI: PE 16:0/18:2;  $C_{39}H_{74}NO_8P$ ; theoretical  $m/z$  714.5, (M-H)<sup>-</sup>

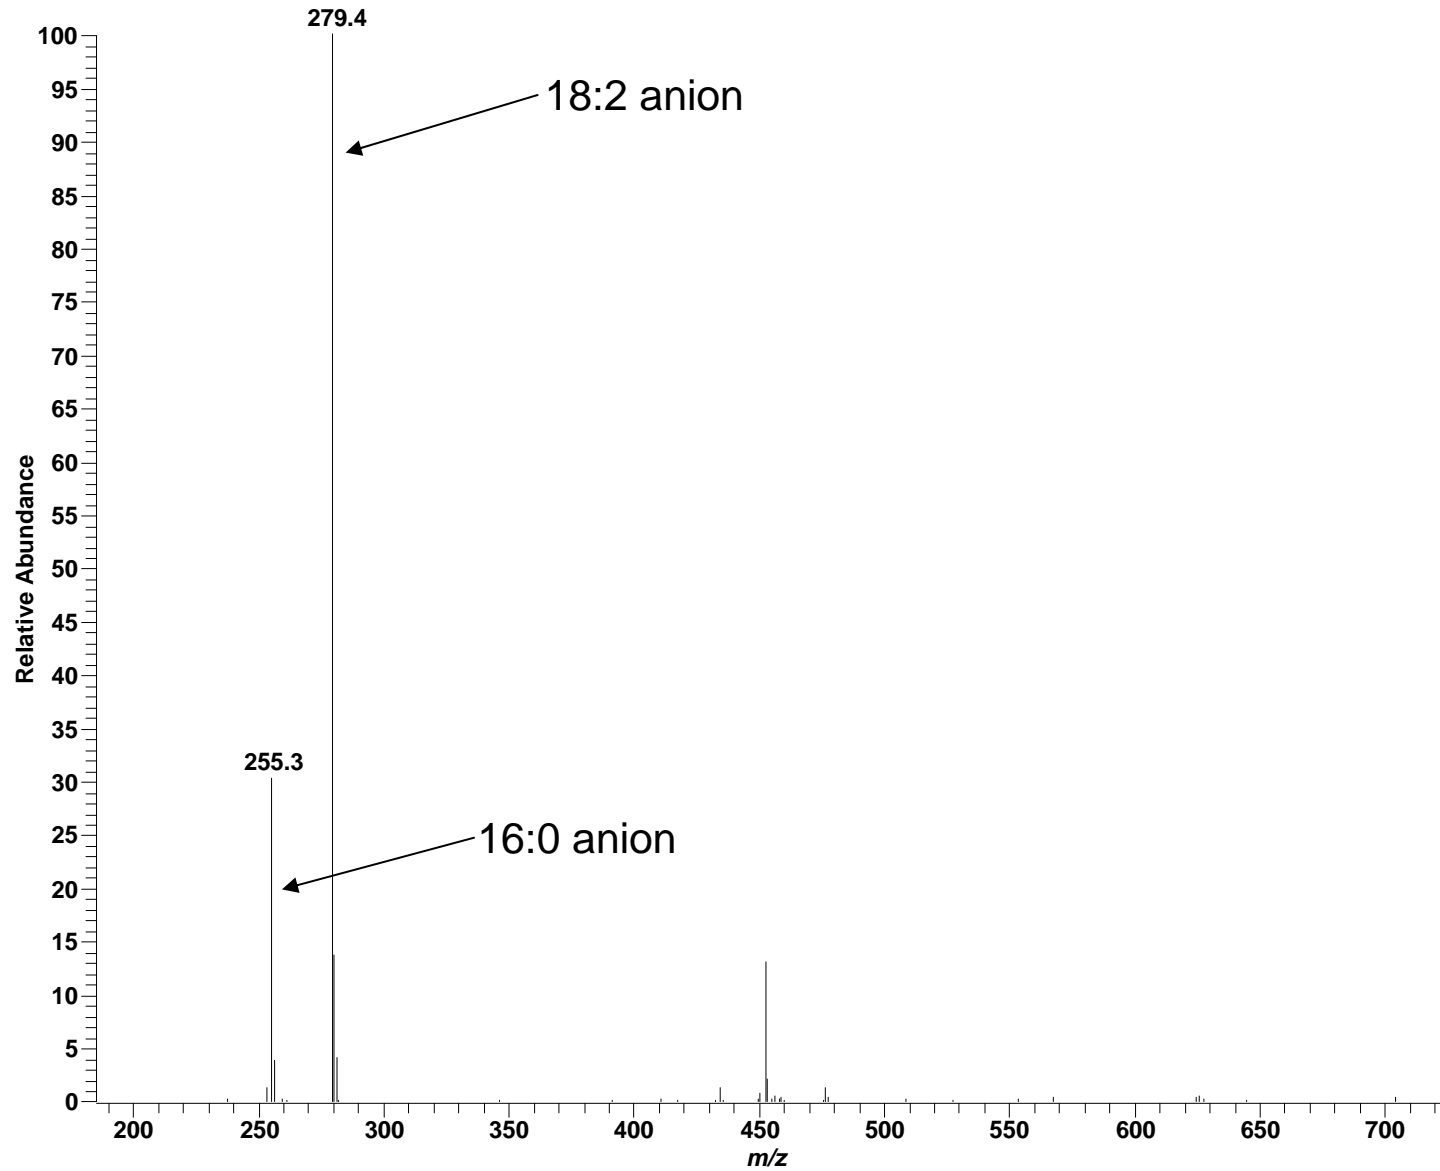

# High mass measurement accuracy MS/MS utilizing LTQ-FT

Positive ESI: PE 16:0/18:1;  $C_{39}H_{76}NO_8P$ ; theoretical  $m/z$  718.5387,  $(M+H)^+$

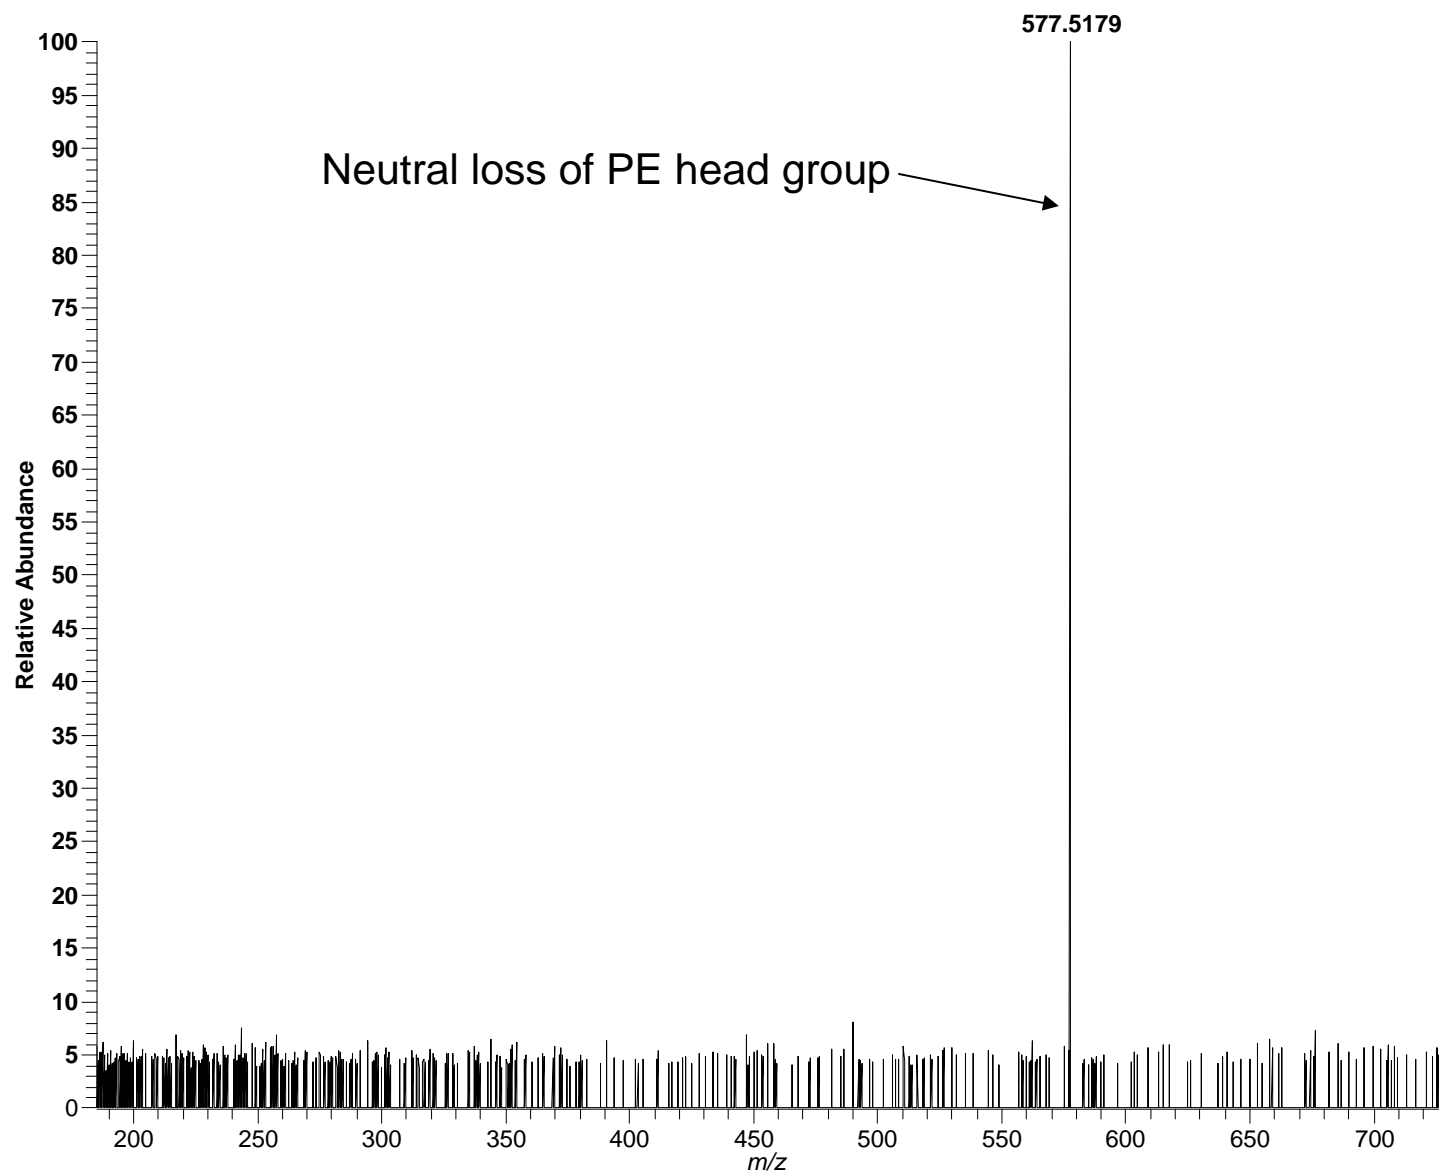

# Low mass measurement accuracy MS/MS utilizing LTQ

Negative ESI: PE 16:0/18:1;  $C_{39}H_{76}NO_8P$ ; theoretical  $m/z$  716.5, (M-H)<sup>-</sup>

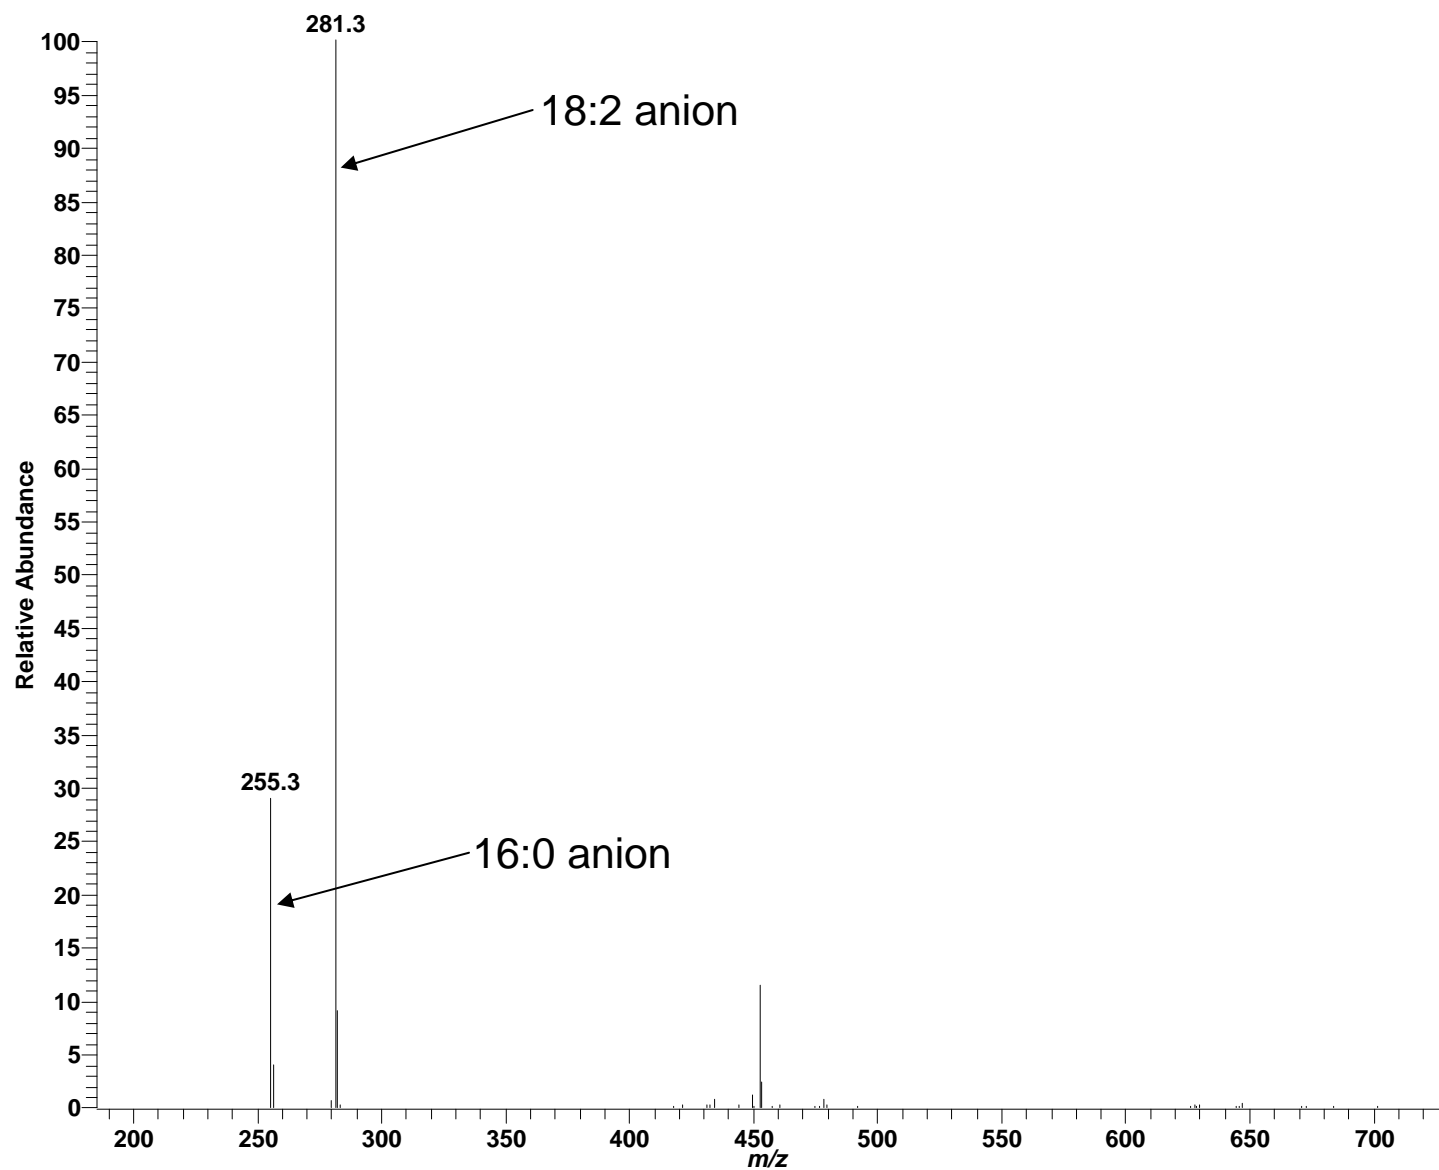

# High mass measurement accuracy MS/MS utilizing LTQ-FT

Negative ESI: PE (18:0/6:0-dihydroxy);  $C_{23}H_{44}NO_7P$ ; theoretical  $m/z$  610.3720,  $(M-H)^-$

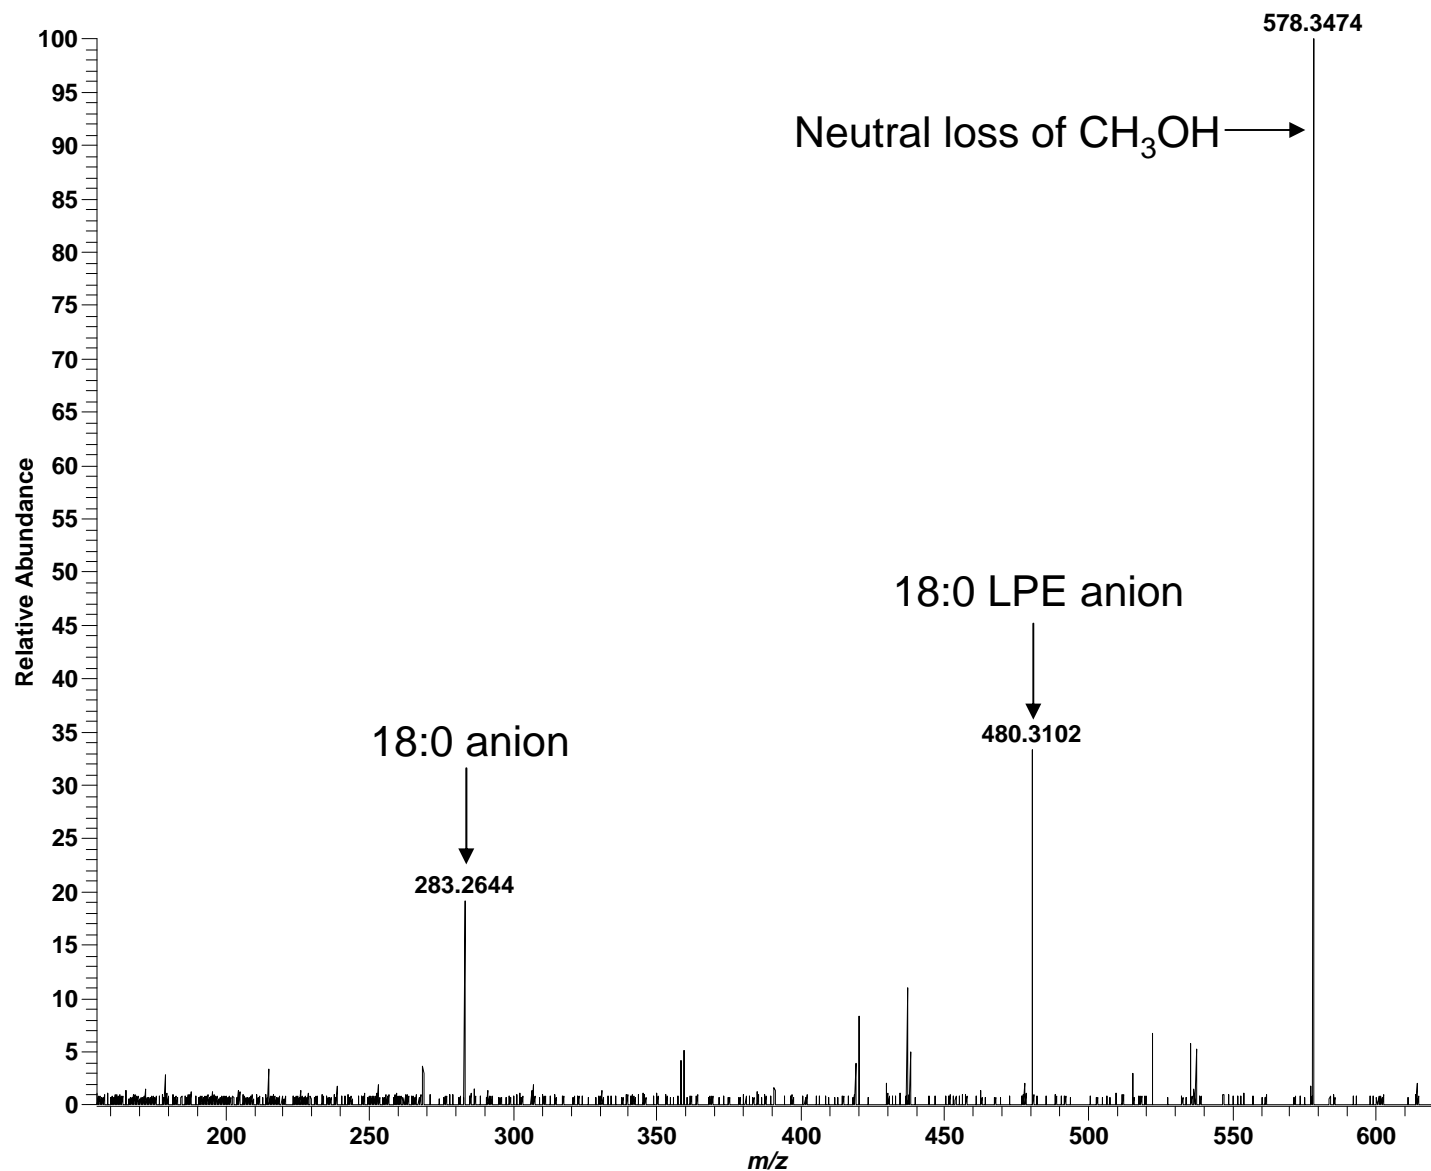

# Low mass measurement accuracy MS/MS utilizing LTQ

Positive ESI: LPE (20:3);  $C_{25}H_{46}NO_7P$ ; theoretical  $m/z$  504.3,  $(M+H)^+$

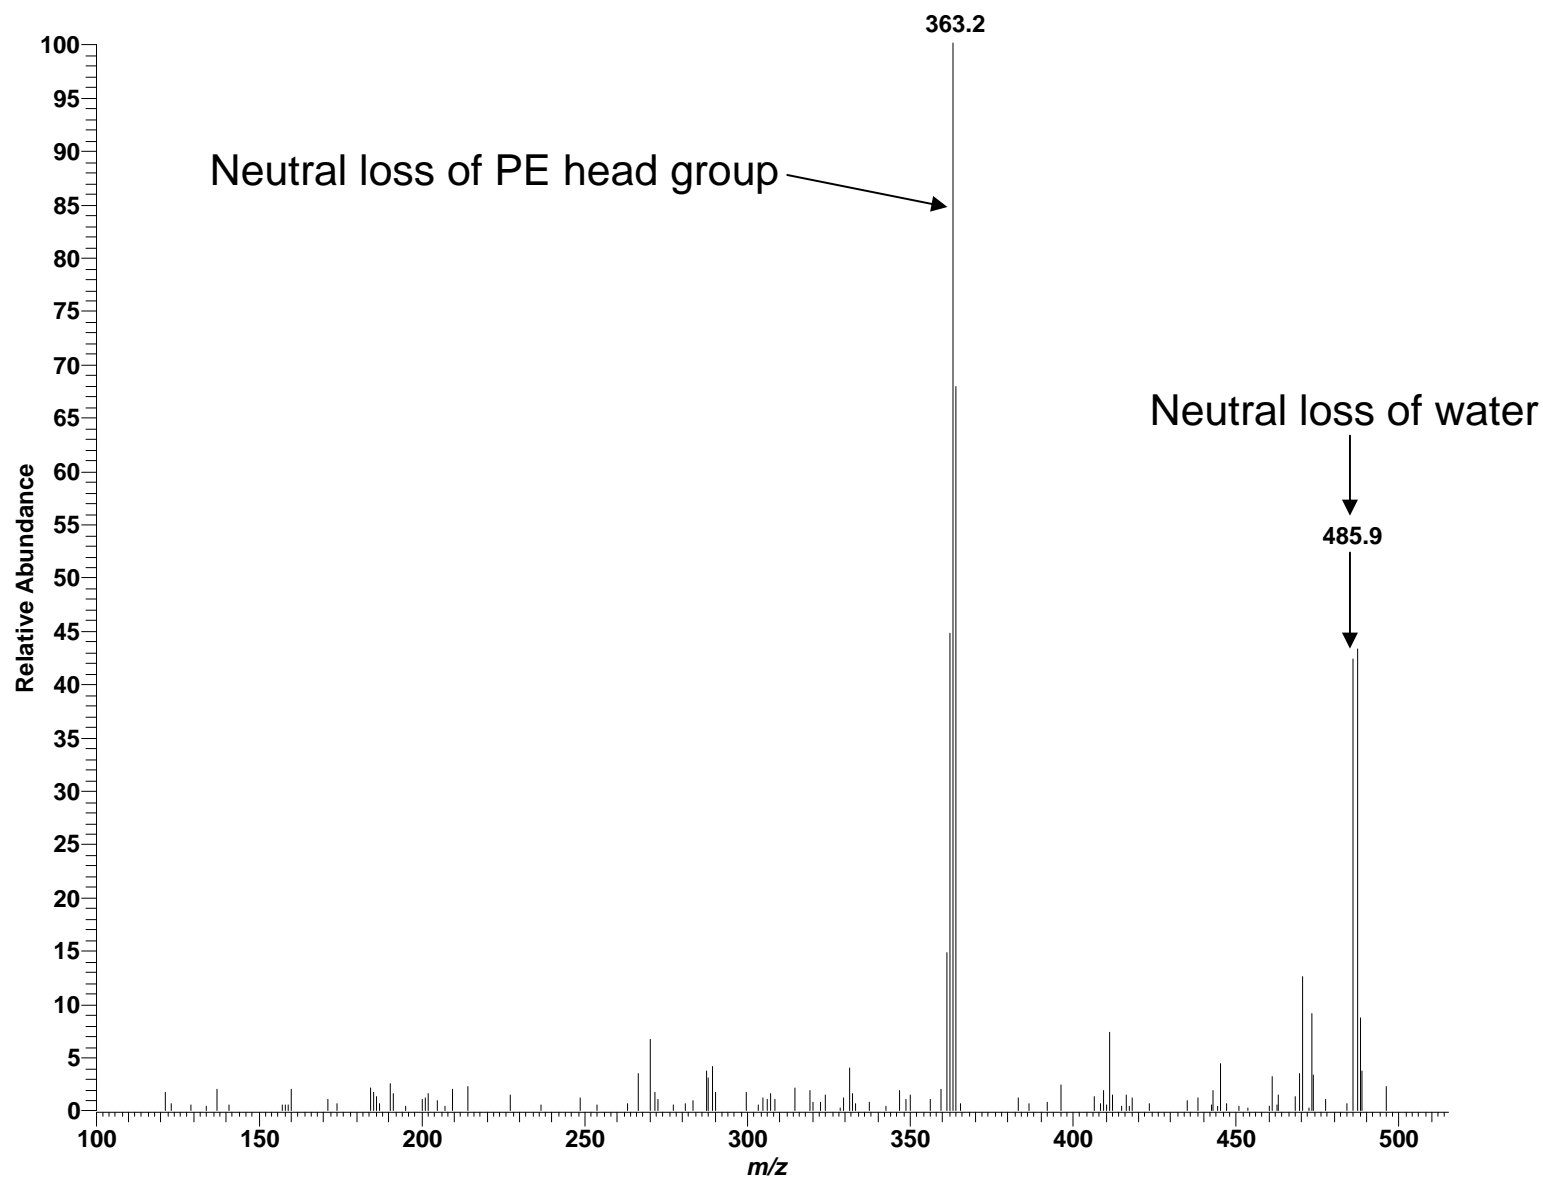

# Glycerophosphocholines

# Low mass measurement accuracy MS/MS utilizing LTQ

Positive ESI: LPC (15:0);  $C_{23}H_{48}NO_7P$ ; theoretical  $m/z$  482.3,  $(M+H)^+$

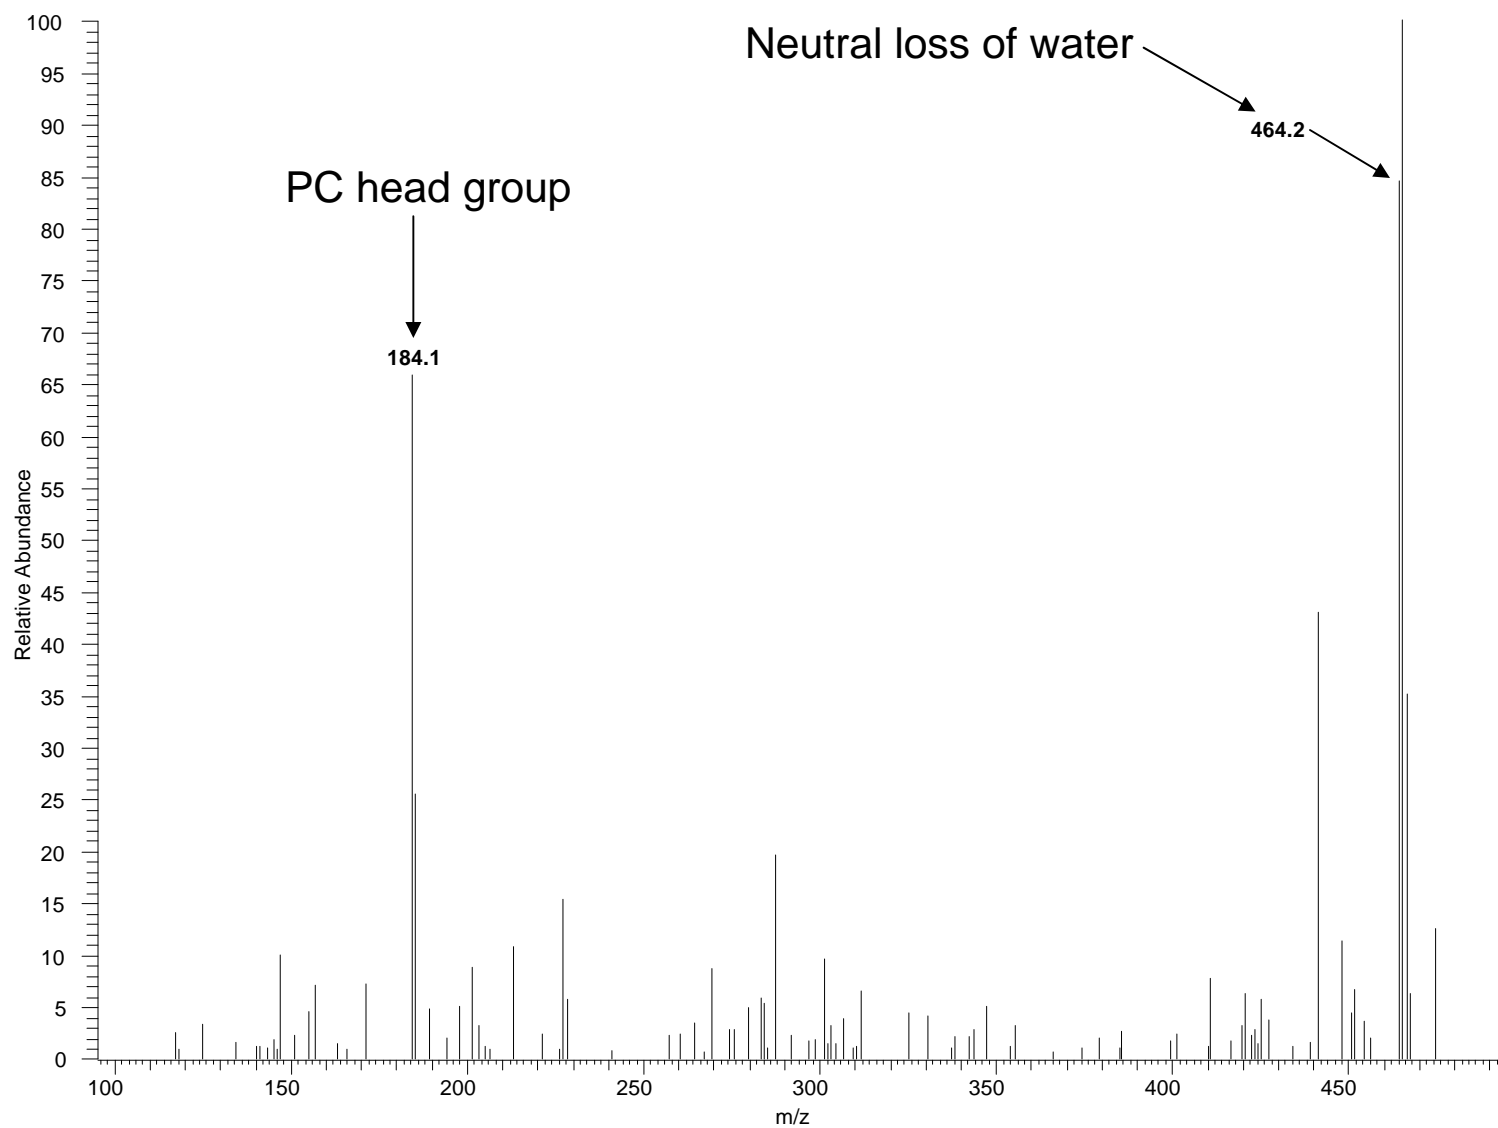



# High mass measurement accuracy MS/MS utilizing LTQ-FT

Positive ESI: LPC 14:0;  $C_{22}H_{46}NO_7P$ ; theoretical  $m/z$  468.3090,  $(M+H)^+$

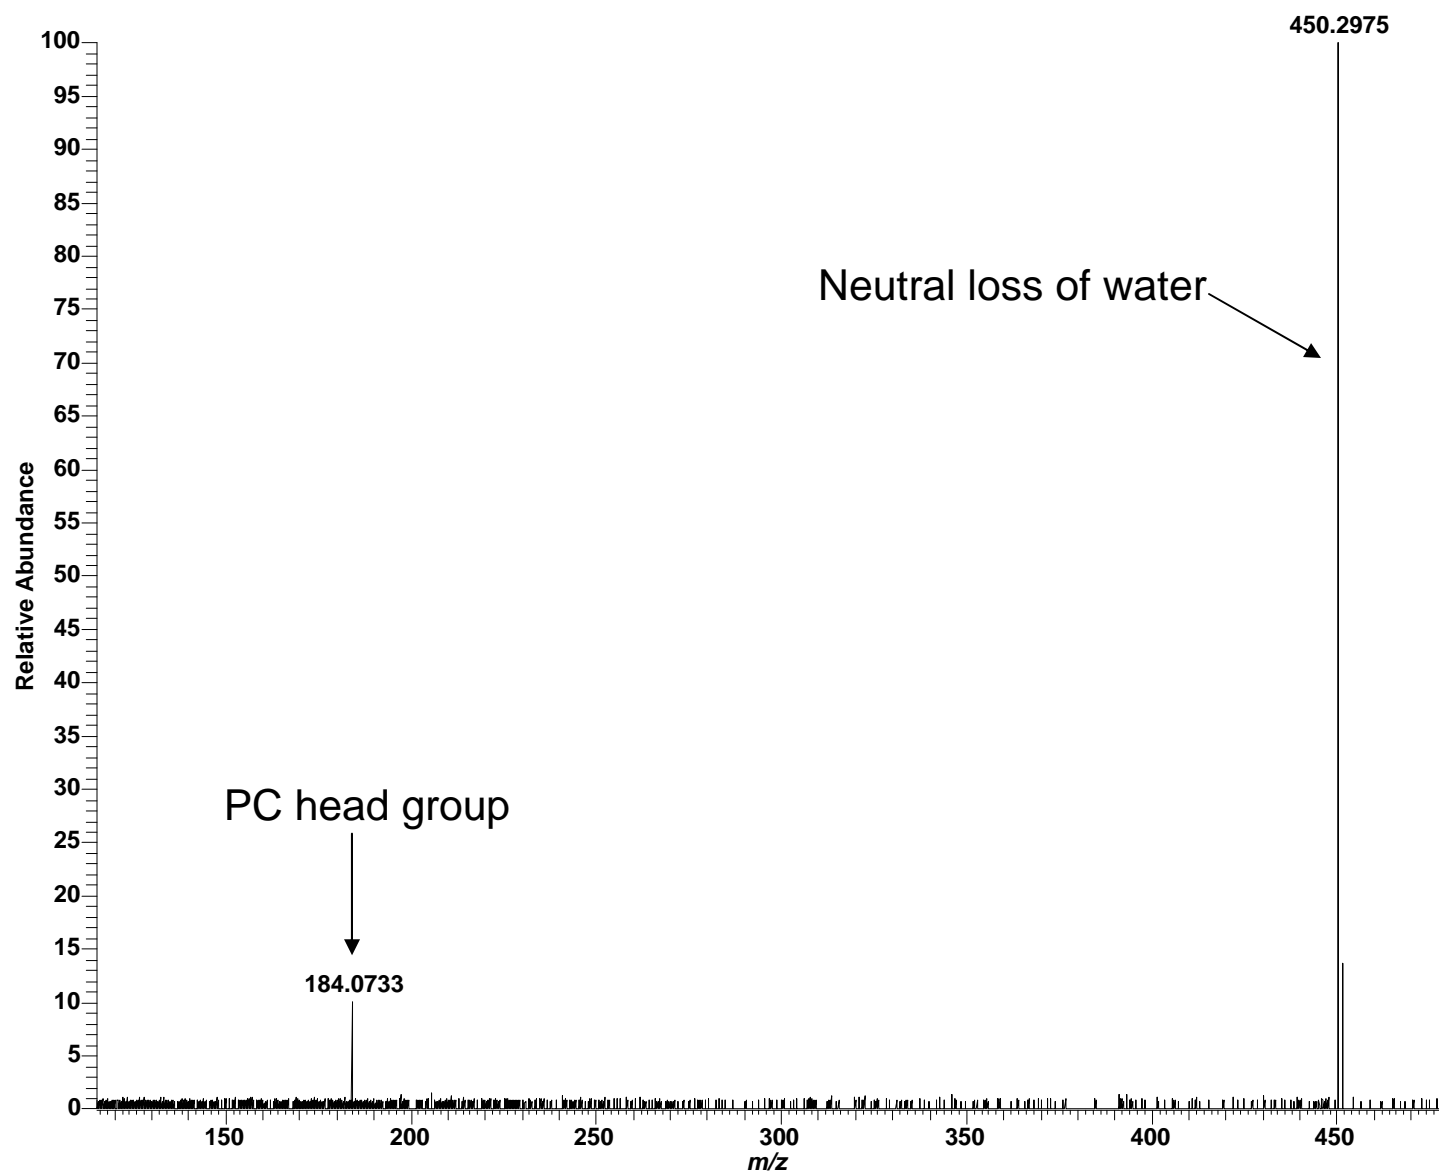

# High mass measurement accuracy MS/MS utilizing LTQ-FT

Negative ESI: LPC 14:0;  $C_{22}H_{46}NO_7P$ ; theoretical  $m/z$  526.3145,  $(M+CH_3COO)^-$

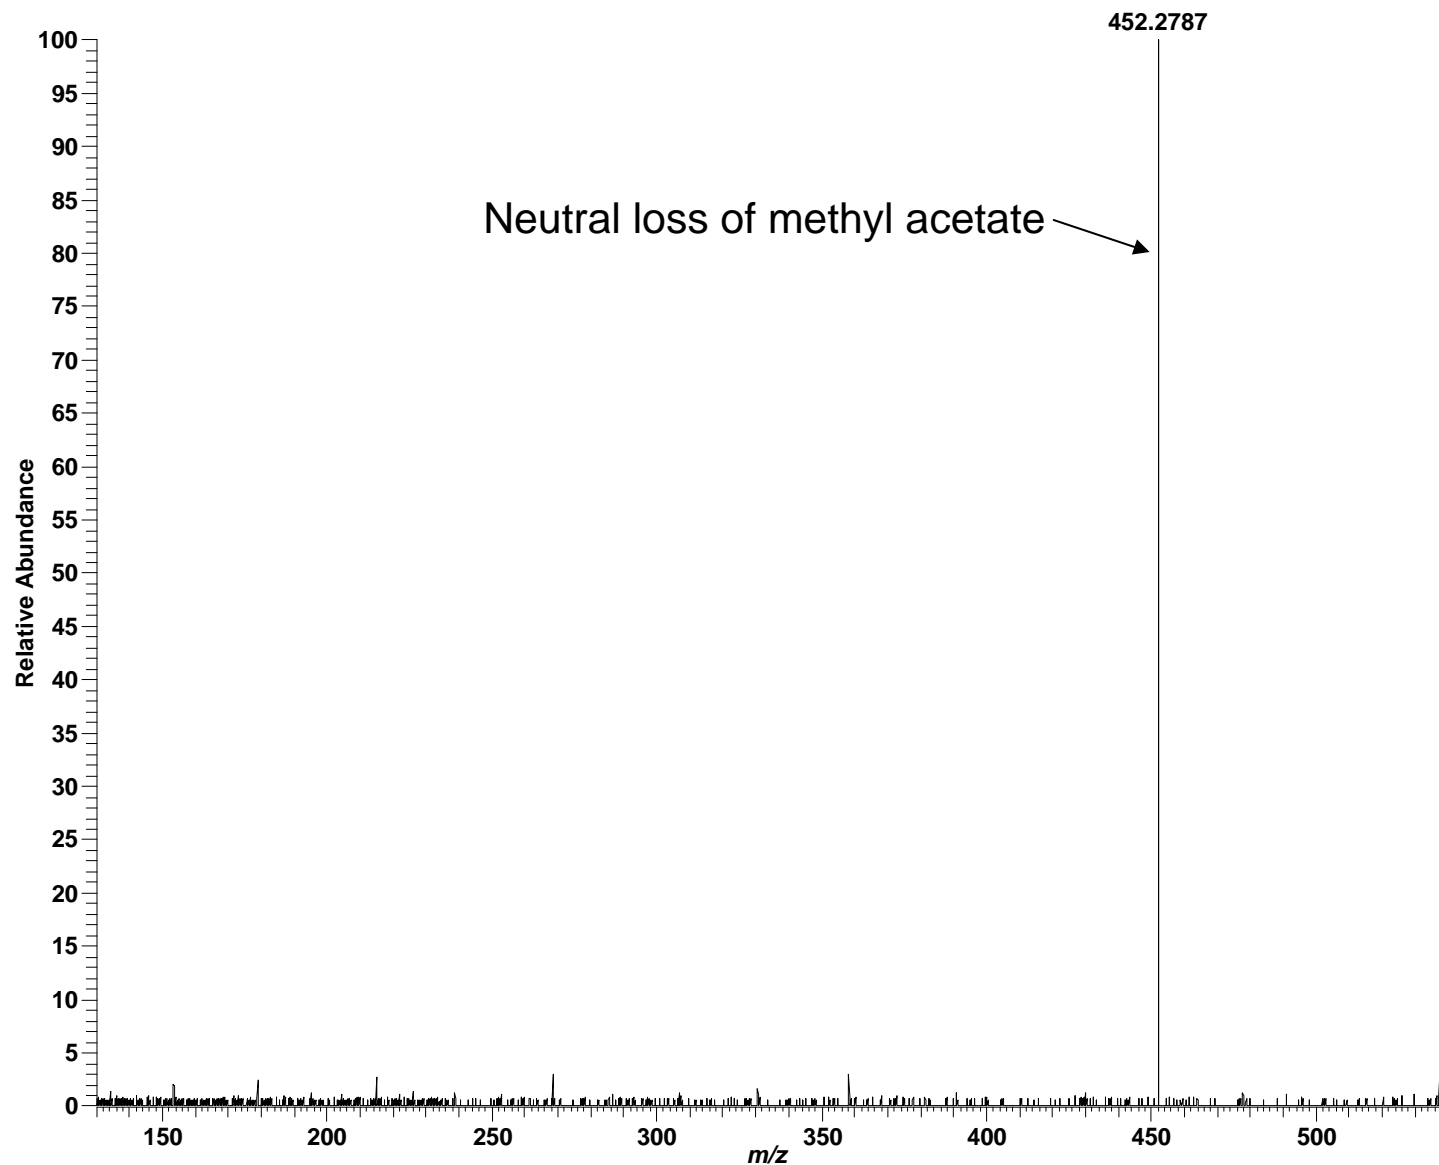

# High mass measurement accuracy MS/MS utilizing LTQ-FT

Positive ESI: LPC 18:3;  $C_{26}H_{48}NO_7P$ ; theoretical  $m/z$  518.3246,  $(M+H)^+$

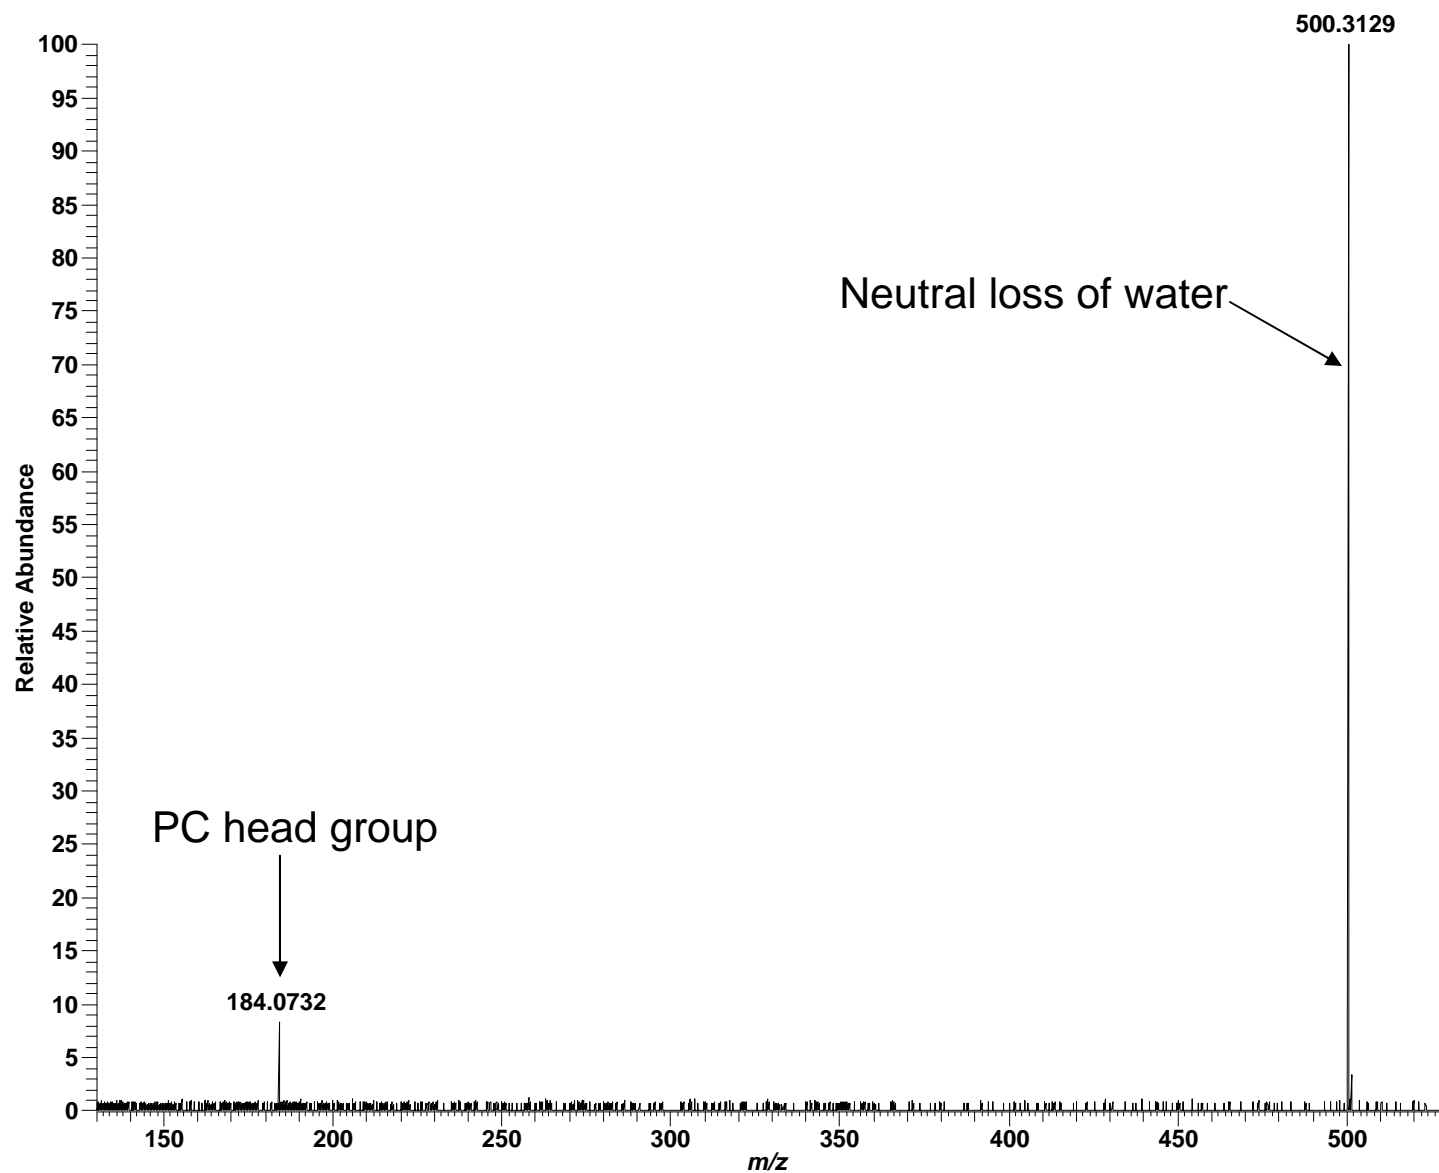

High mass measurement accuracy MS/MS utilizing LTQ-FT

Negative ESI: LPC 18:3;  $C_{26}H_{48}NO_7P$ ; theoretical  $m/z$  576.3301,  $(M+CH_3COO)^-$

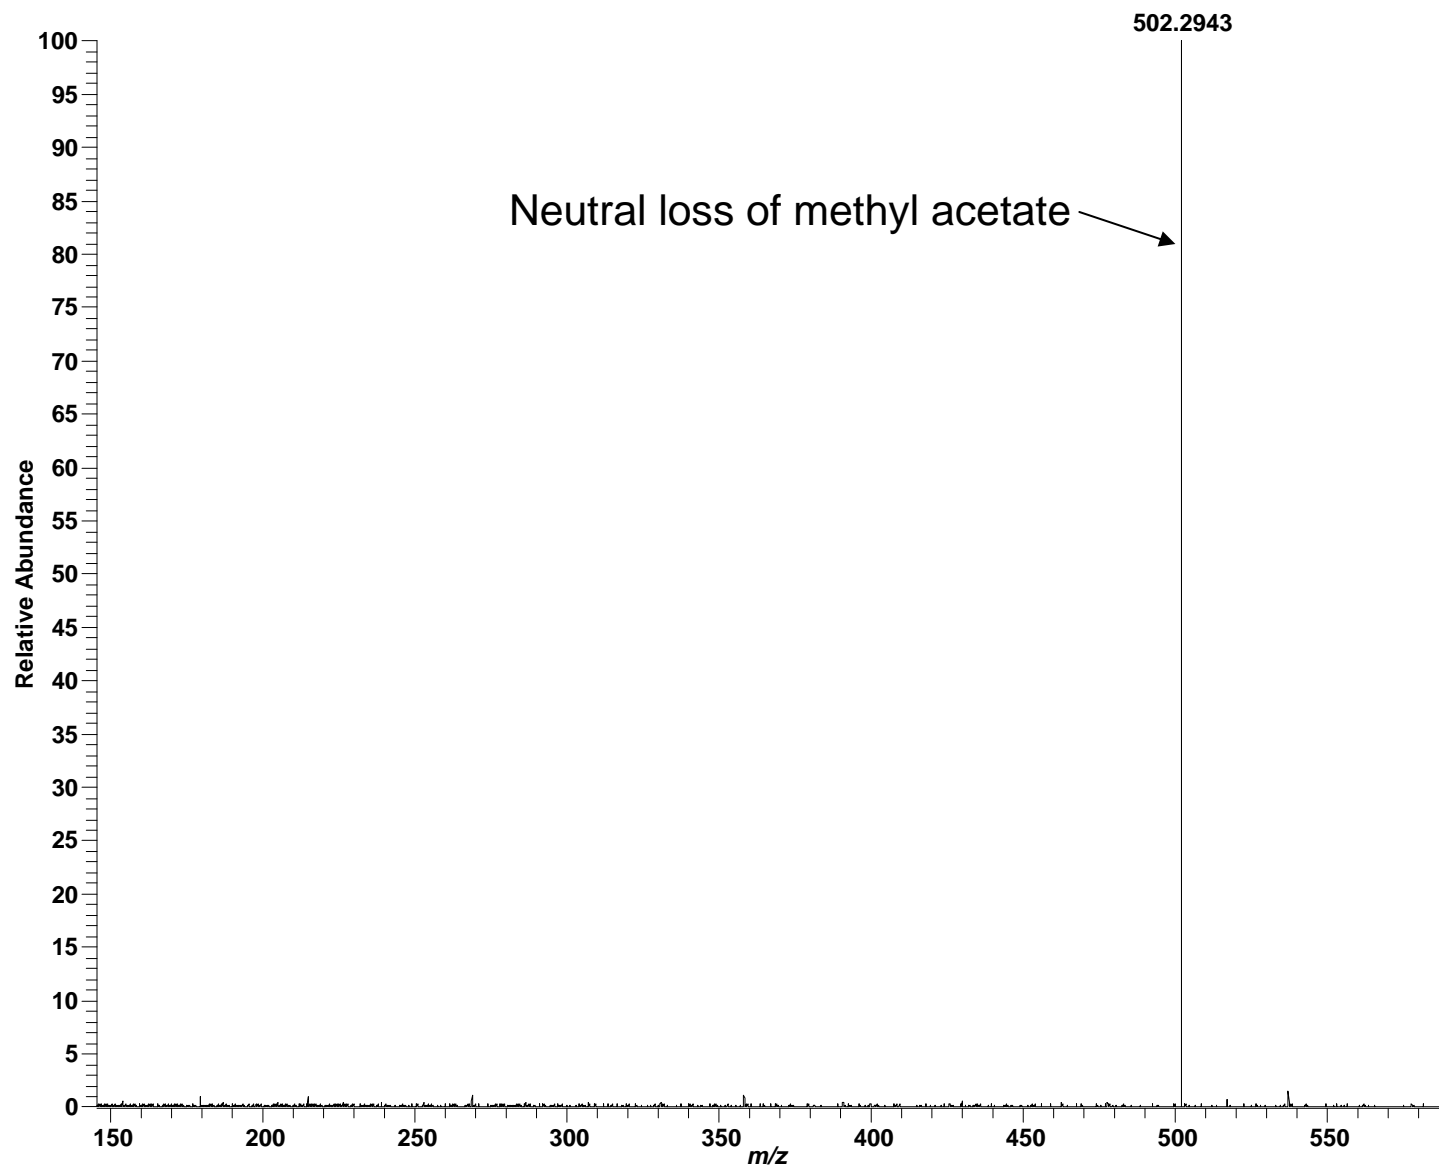

# High mass measurement accuracy MS/MS utilizing LTQ-FT

Positive ESI: LPC 20:5;  $C_{28}H_{48}NO_7P$ ; theoretical  $m/z$  542.3246,  $(M+H)^+$

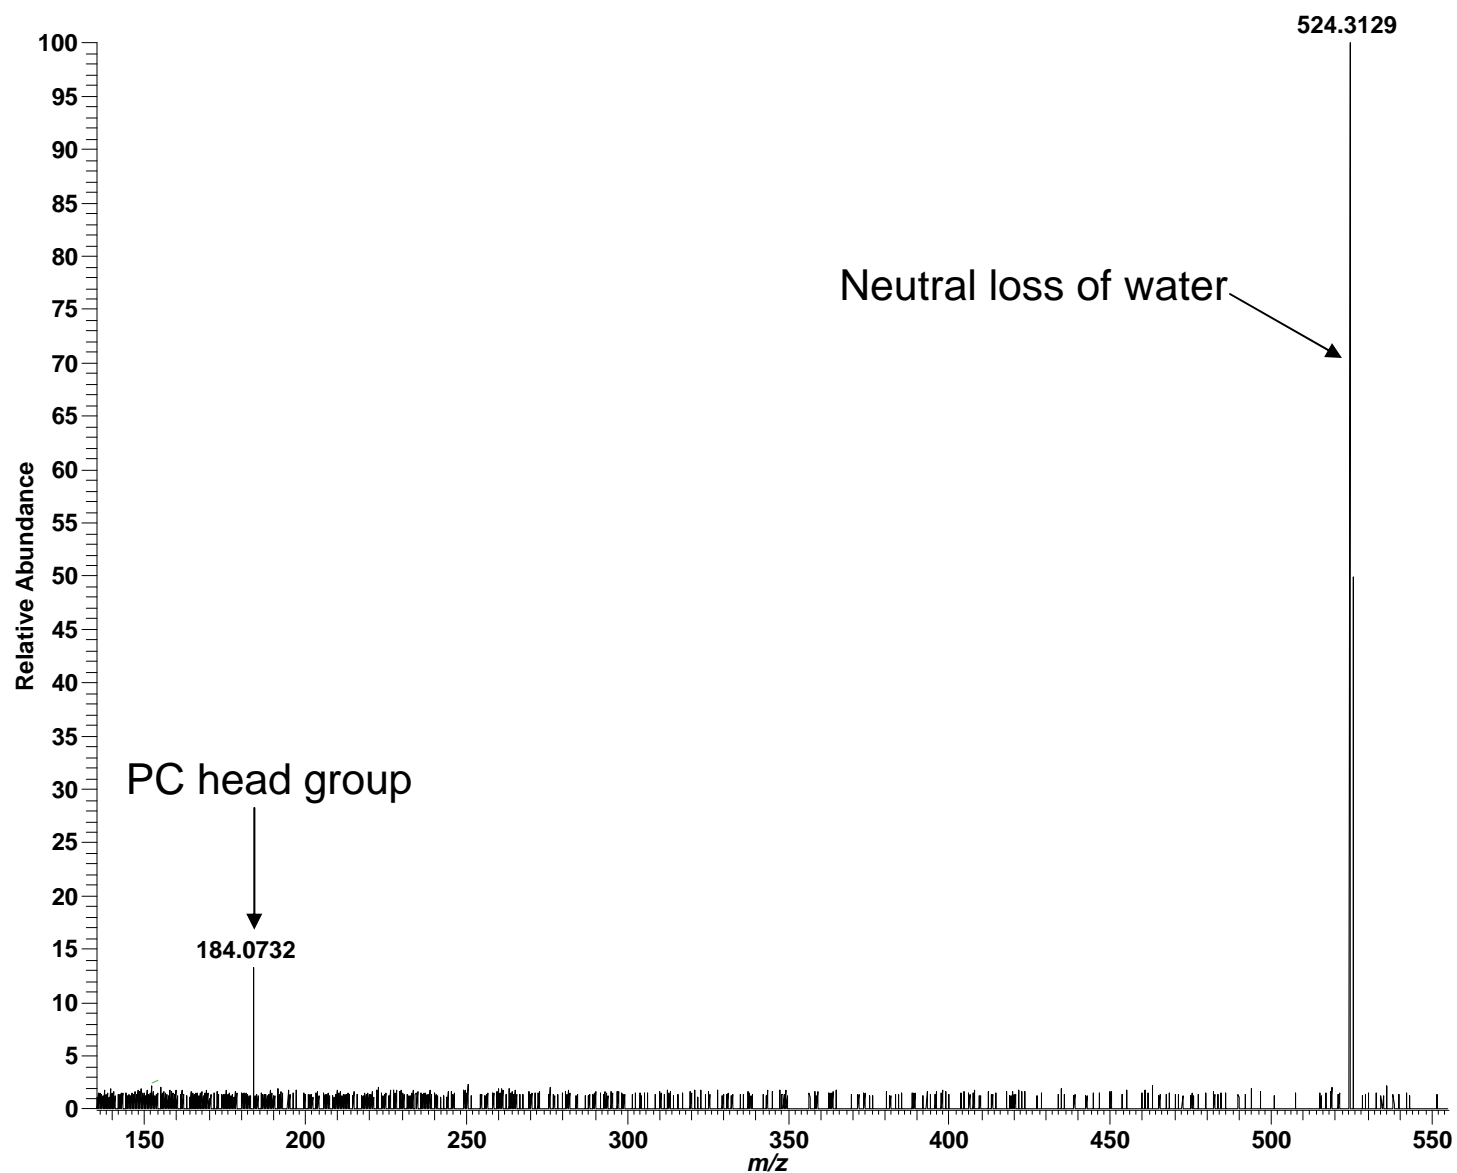

High mass measurement accuracy MS/MS utilizing LTQ-FT

Negative ESI: LPC 20:5;  $C_{28}H_{48}NO_7P$ ; theoretical  $m/z$  600.3301,  $(M+CH_3COO)^-$

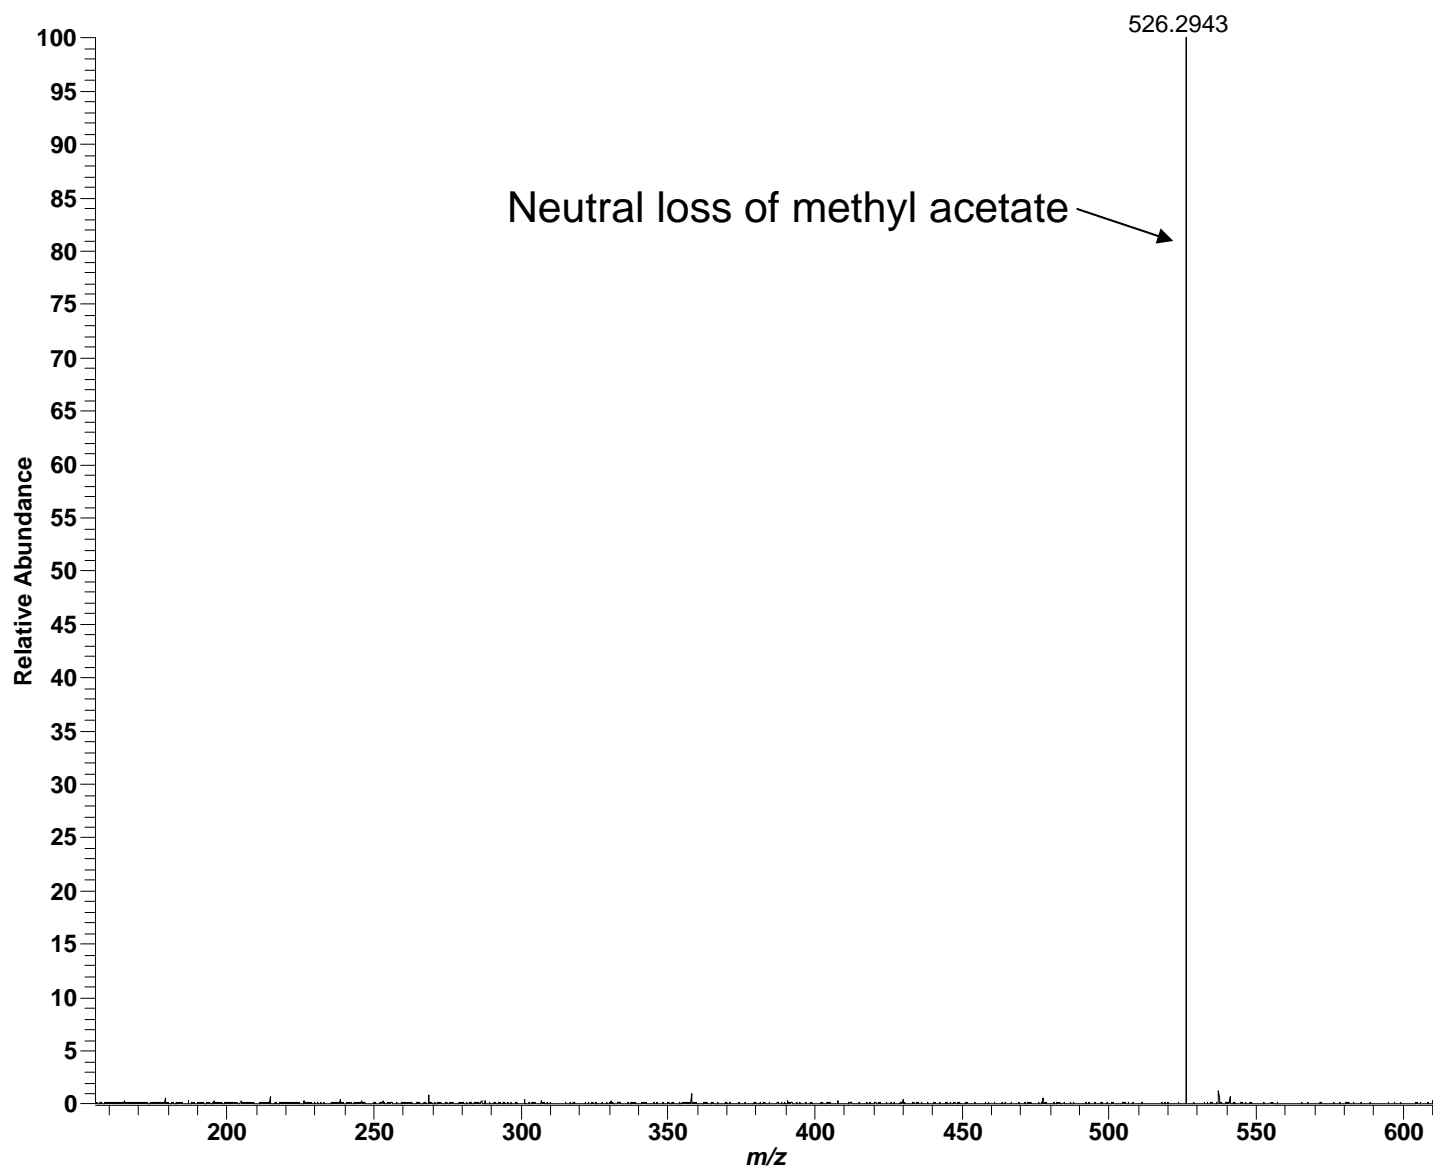

# High mass measurement accuracy MS/MS utilizing LTQ-FT

Positive ESI: LPC 16:1;  $C_{24}H_{48}NO_7P$ ; theoretical  $m/z$  494.3247,  $(M+H)^+$

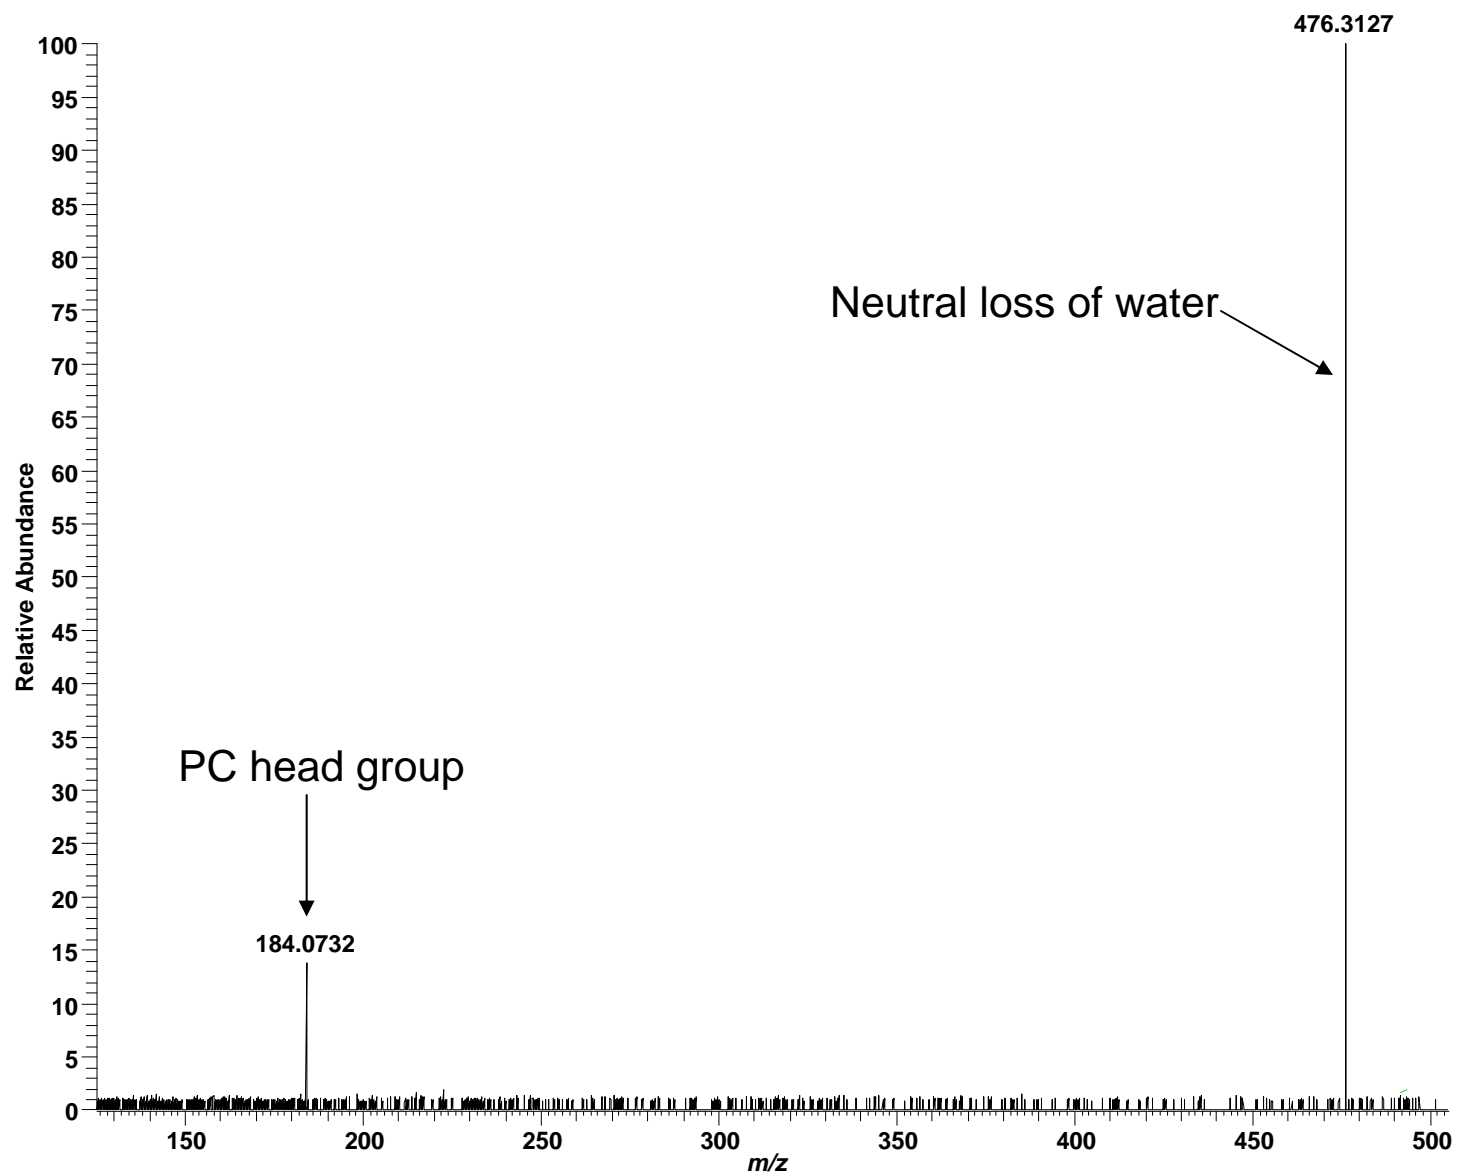

# High mass measurement accuracy MS/MS utilizing LTQ-FT

Negative ESI: LPC 16:1;  $C_{24}H_{48}NO_7P$ ; theoretical  $m/z$  552.3301,  $(M+CH_3COO)^-$

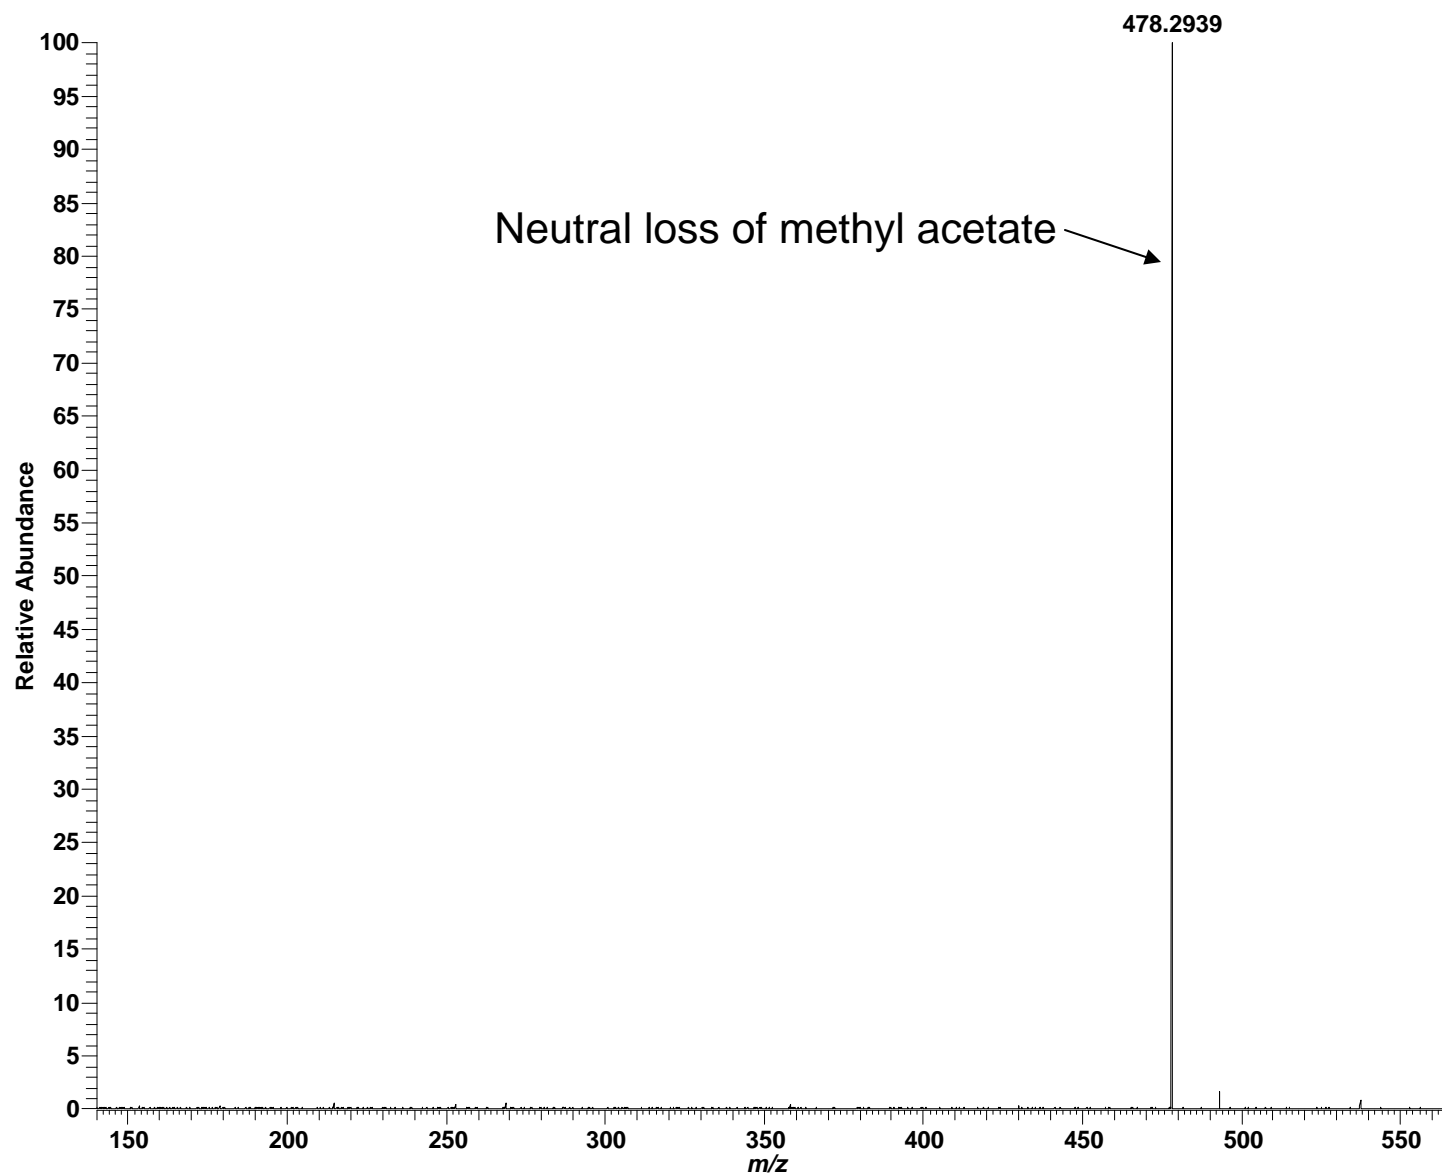



# High mass measurement accuracy MS/MS utilizing LTQ-FT

Positive ESI: LPC 18:2;  $C_{26}H_{50}NO_7P$ ; theoretical  $m/z$  520.3403,  $(M+H)^+$

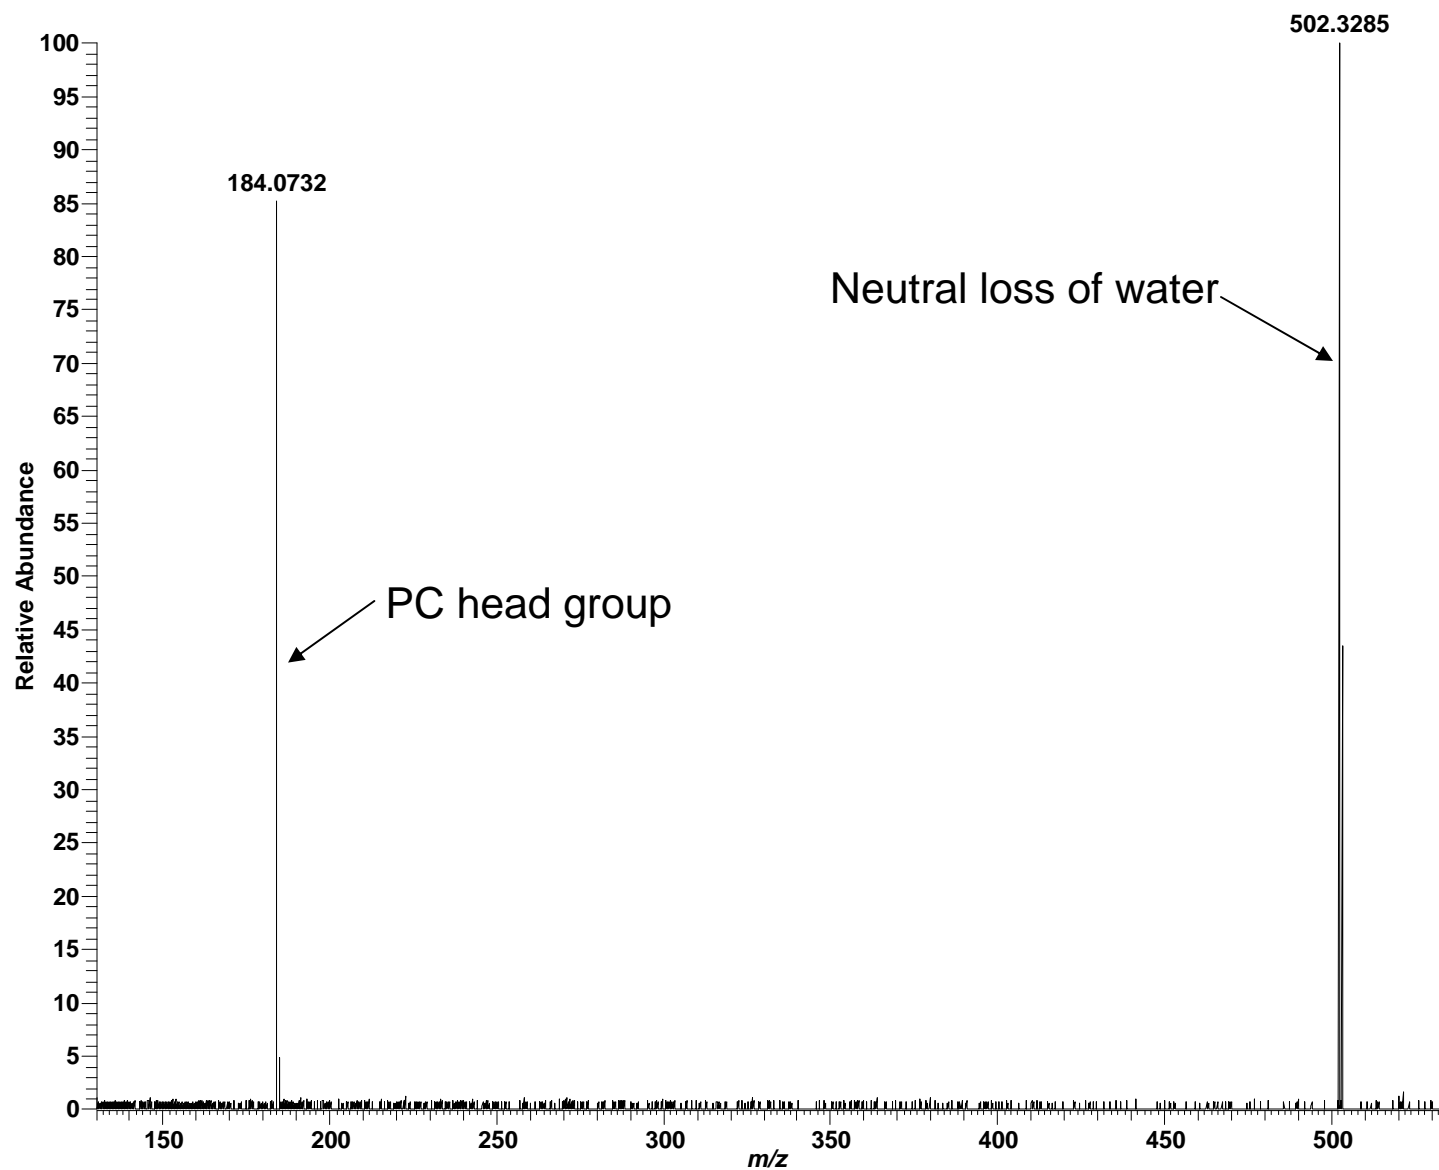

# High mass measurement accuracy MS/MS utilizing LTQ-FT

Negative ESI: LPC 18:2;  $C_{26}H_{50}NO_7P$ ; theoretical  $m/z$  578.3458,  $(M+CH_3COO)^-$

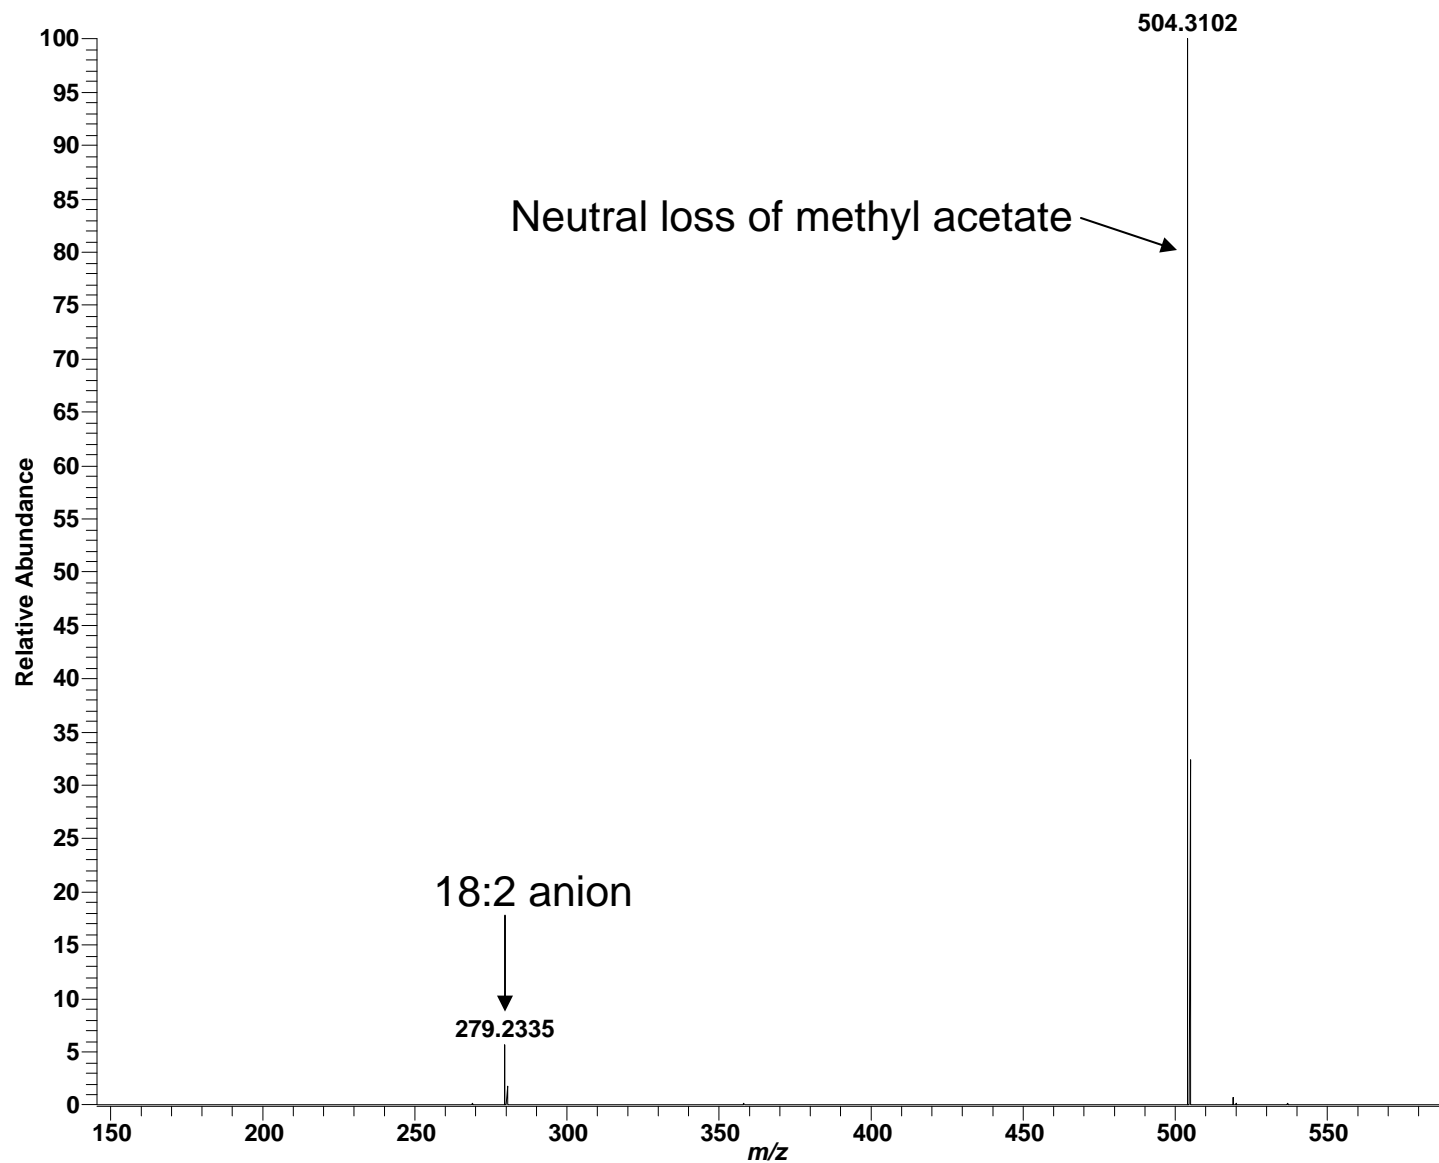

# High mass measurement accuracy MS/MS utilizing LTQ-FT

Positive ESI: LPC 20:4;  $C_{28}H_{50}NO_7P$ ; theoretical  $m/z$  544.3403,  $(M+H)^+$

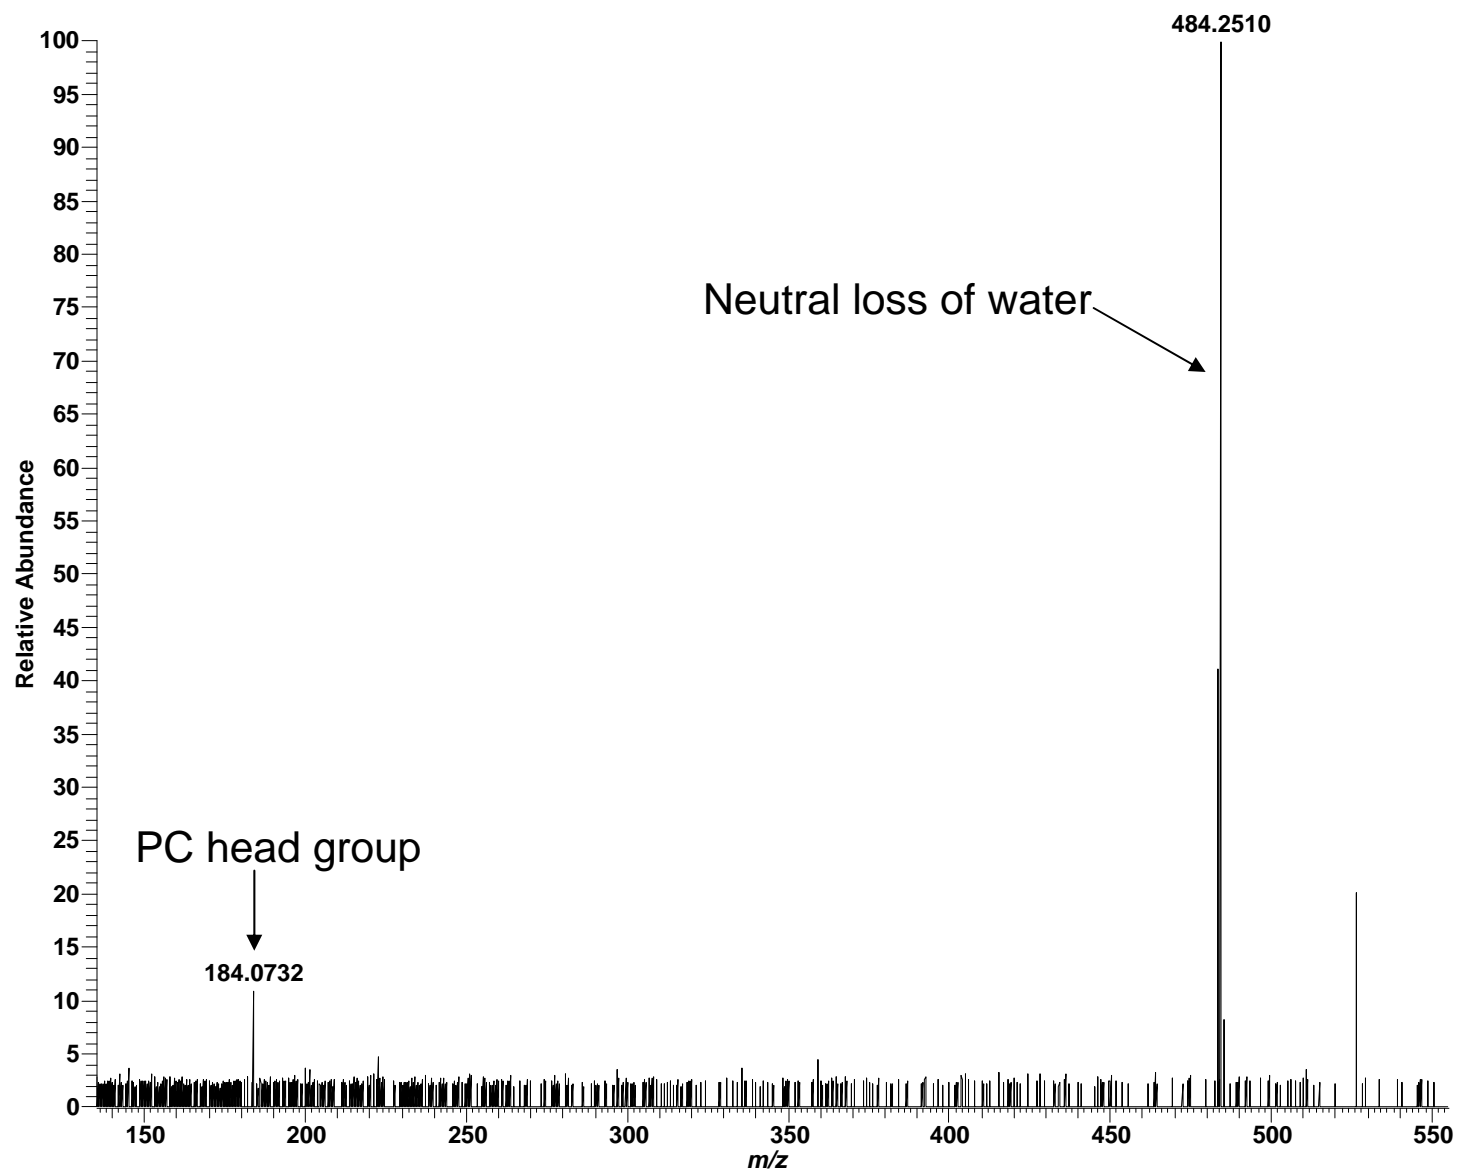

# High mass measurement accuracy MS/MS utilizing LTQ-FT

Negative ESI: LPC 20:4;  $C_{28}H_{50}NO_7P$ ; theoretical  $m/z$  602.3458,  $(M+CH_3COO)^-$

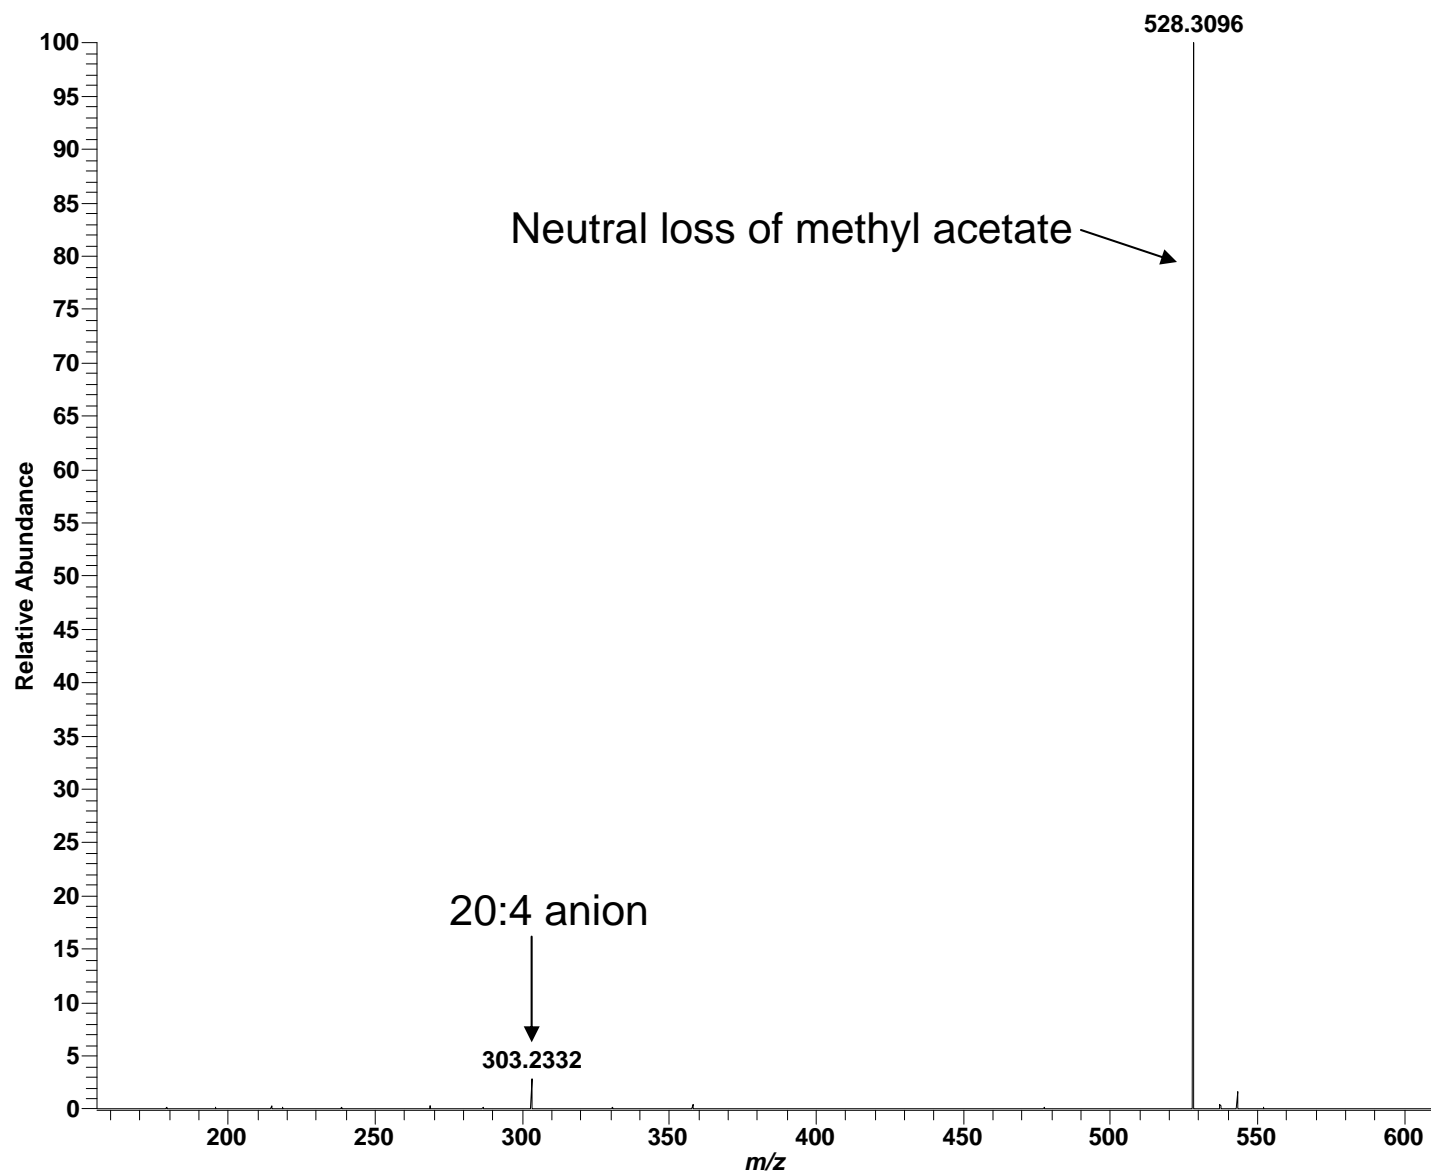

# High mass measurement accuracy MS/MS utilizing LTQ-FT

Positive ESI: LPC 22:6;  $C_{30}H_{50}NO_7P$ ; theoretical  $m/z$  568.3403,  $(M+H)^+$

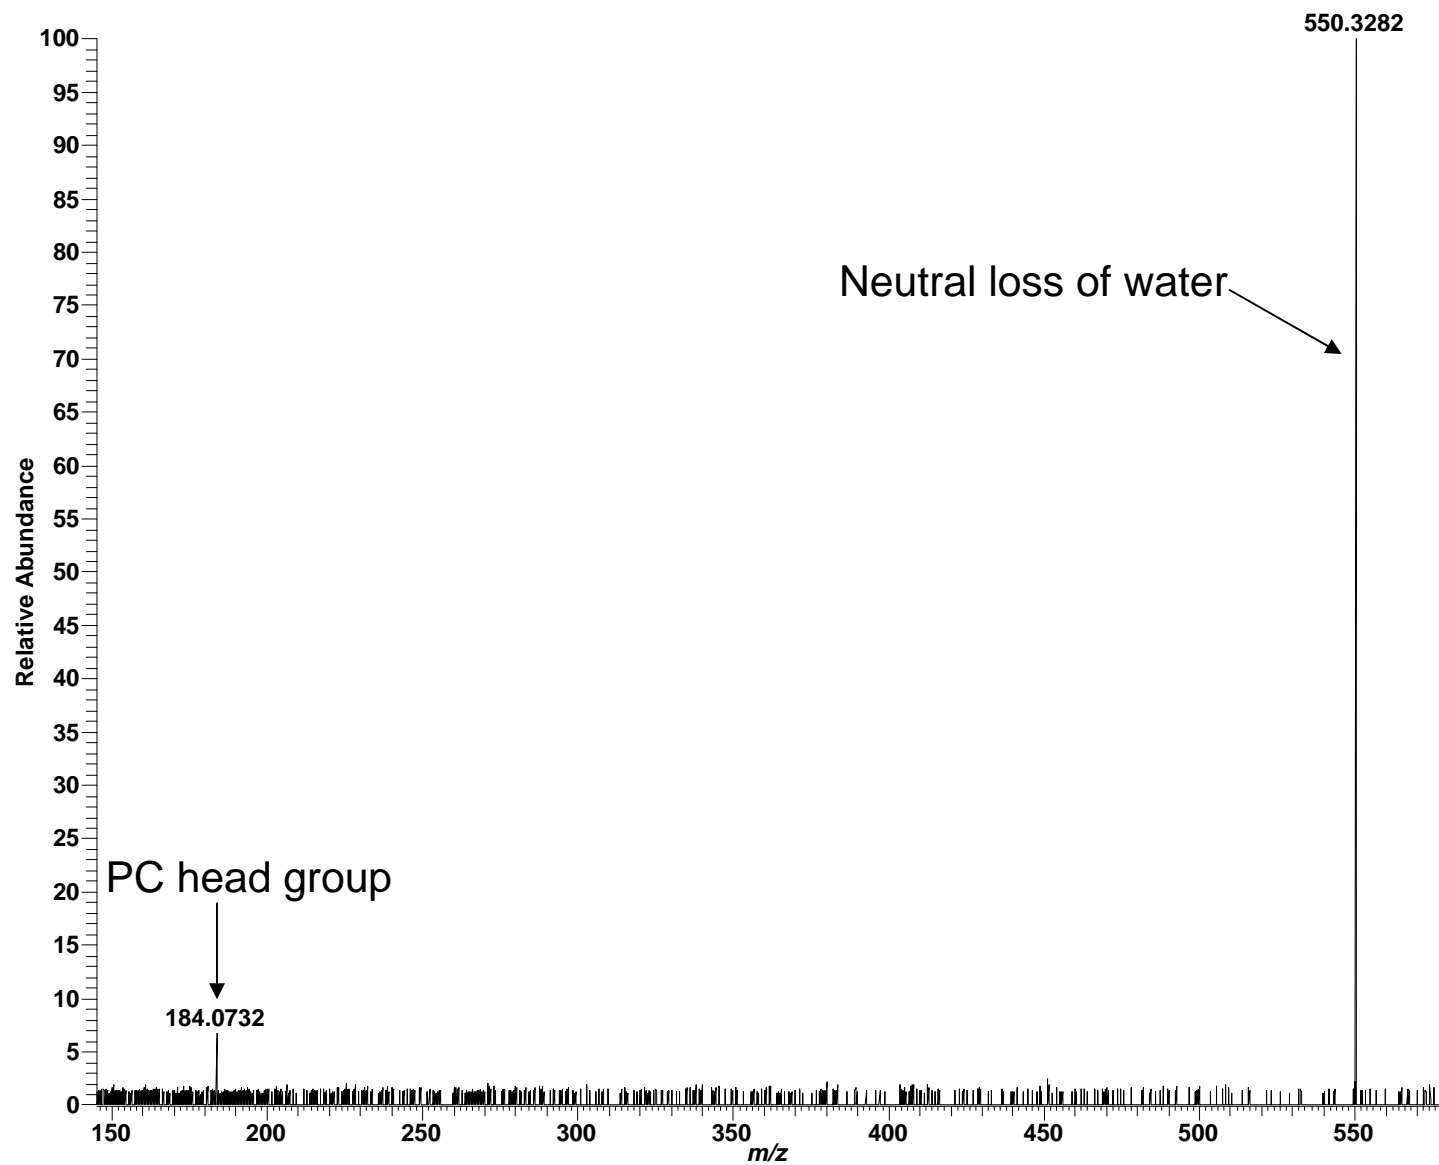

# High mass measurement accuracy MS/MS utilizing LTQ-FT

Negative ESI: LPC 22:6;  $C_{30}H_{50}NO_7P$ ; theoretical  $m/z$  626.3458,  $(M+CH_3COO)^-$

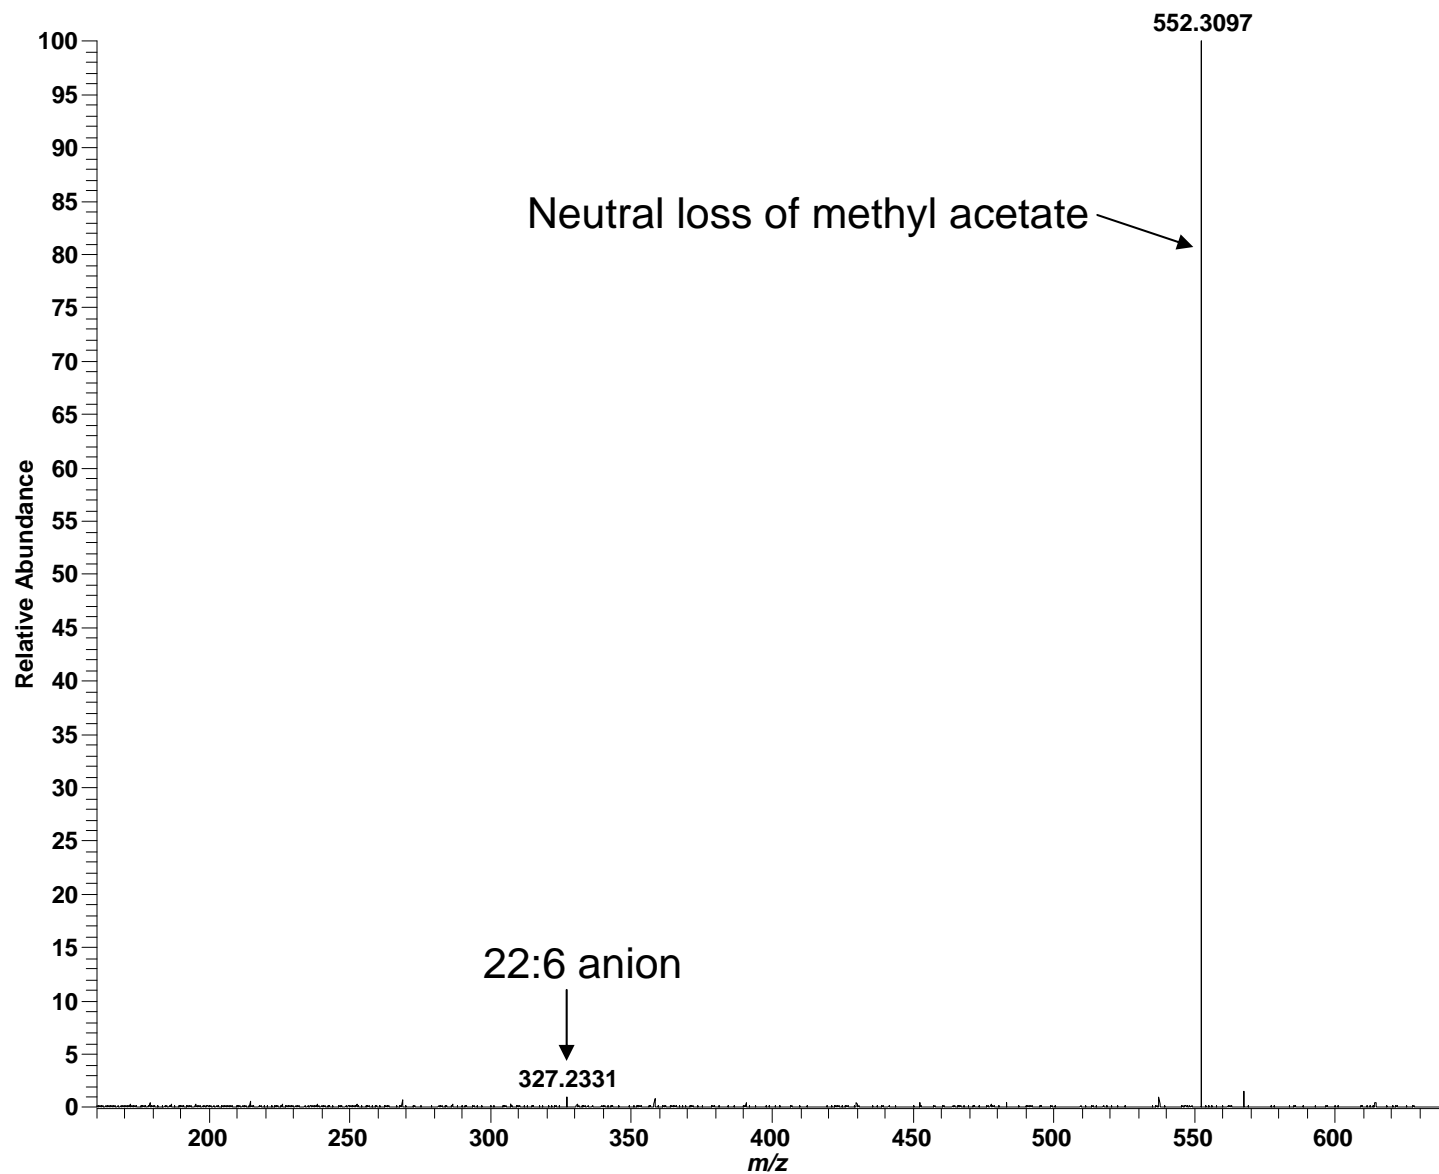

# High mass measurement accuracy MS/MS utilizing LTQ-FT

Positive ESI: LPC 16:0;  $C_{24}H_{50}NO_7P$ ; theoretical  $m/z$  496.3403,  $(M+H)^+$

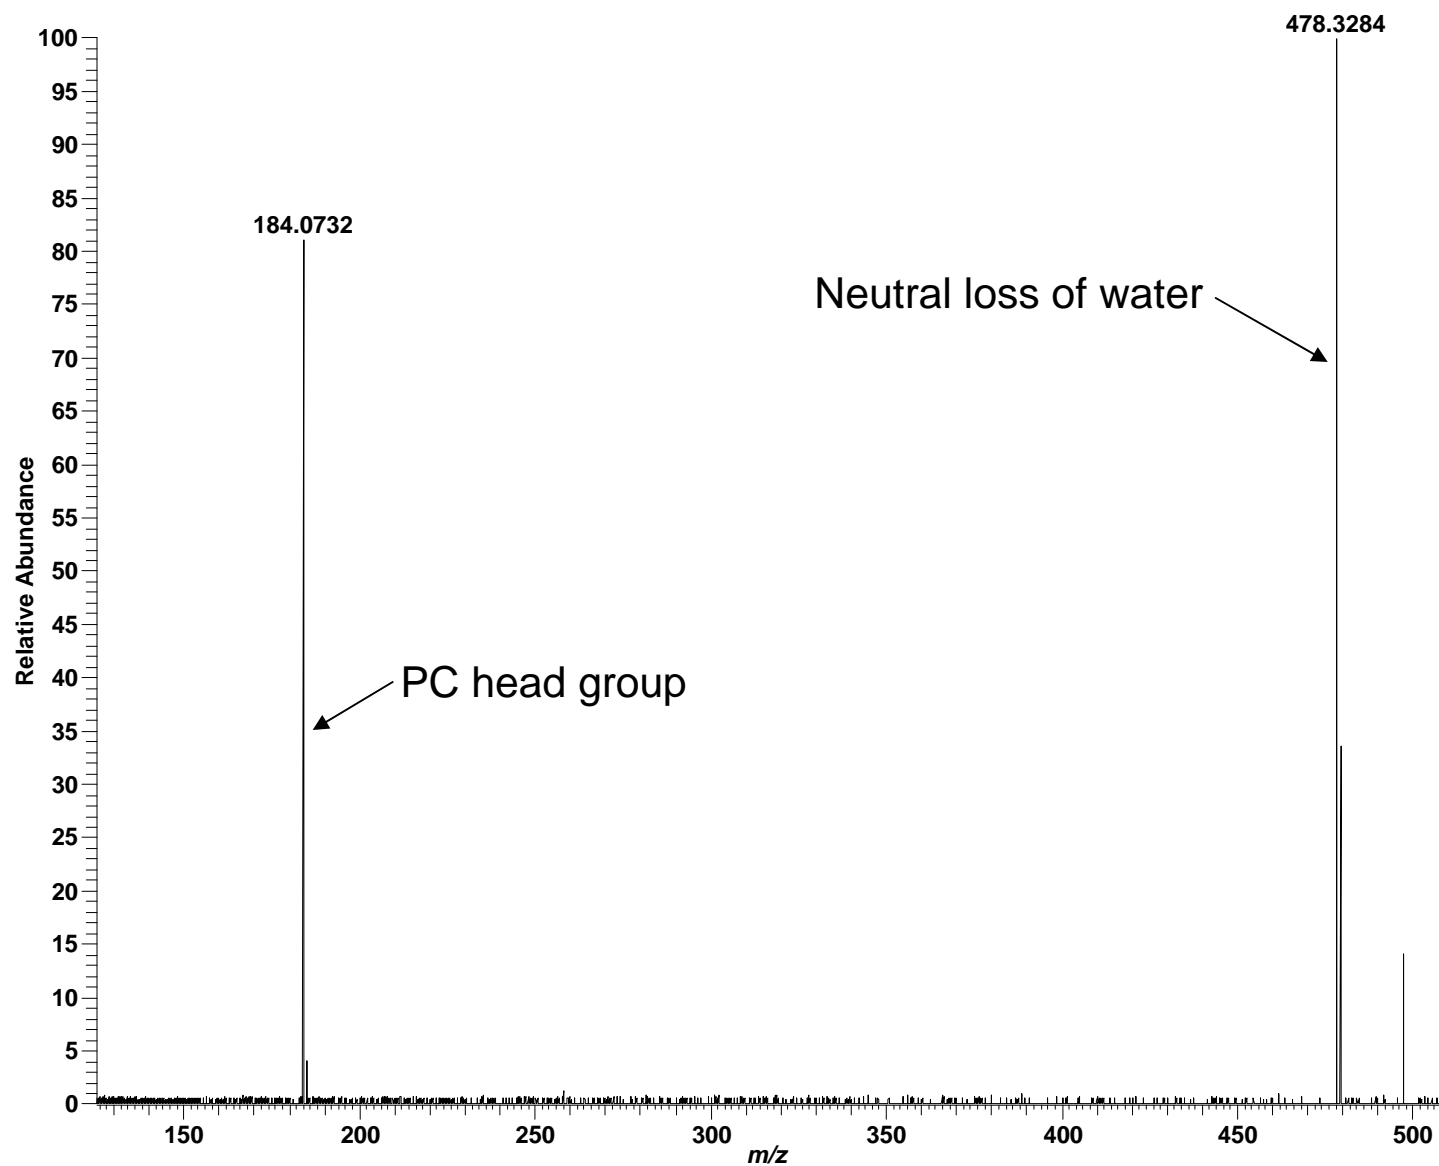

# High mass measurement accuracy MS/MS utilizing LTQ-FT

Negative ESI: LPC 16:0;  $C_{30}H_{50}NO_7P$ ; theoretical  $m/z$  554.3458,  $(M+CH_3COO)^-$

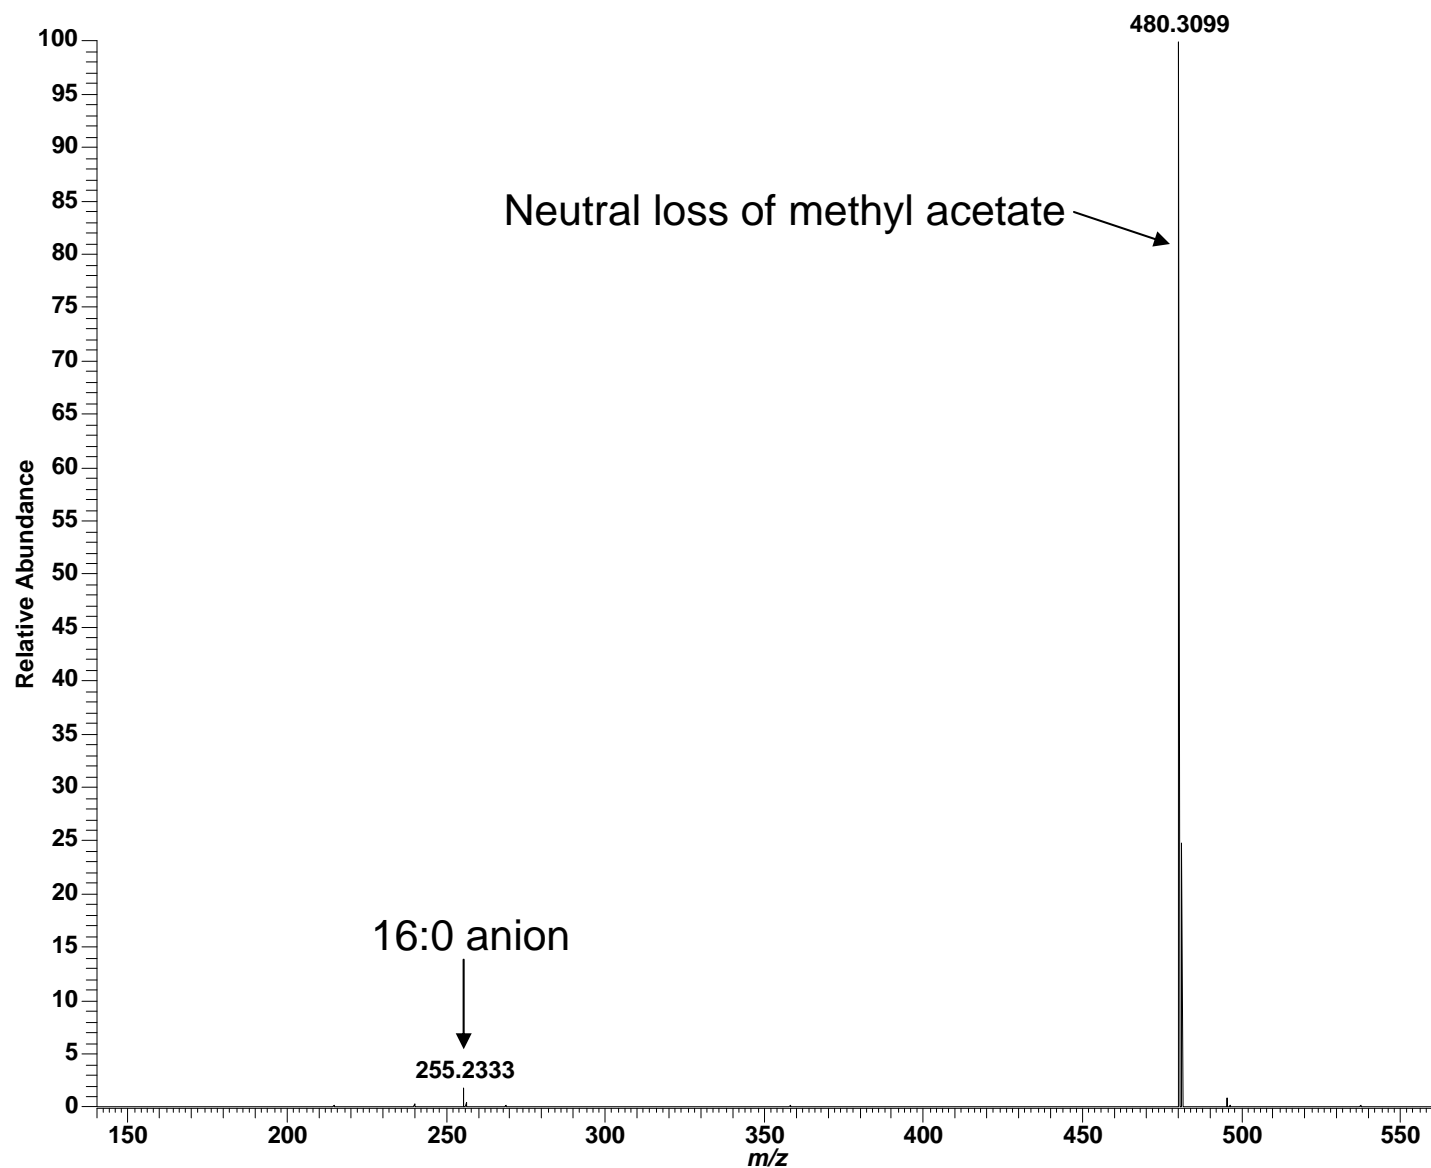



# High mass measurement accuracy MS/MS utilizing LTQ-FT

Positive ESI: LPC 20:3;  $C_{28}H_{52}NO_7P$ ; theoretical  $m/z$  546.3559,  $(M+H)^+$

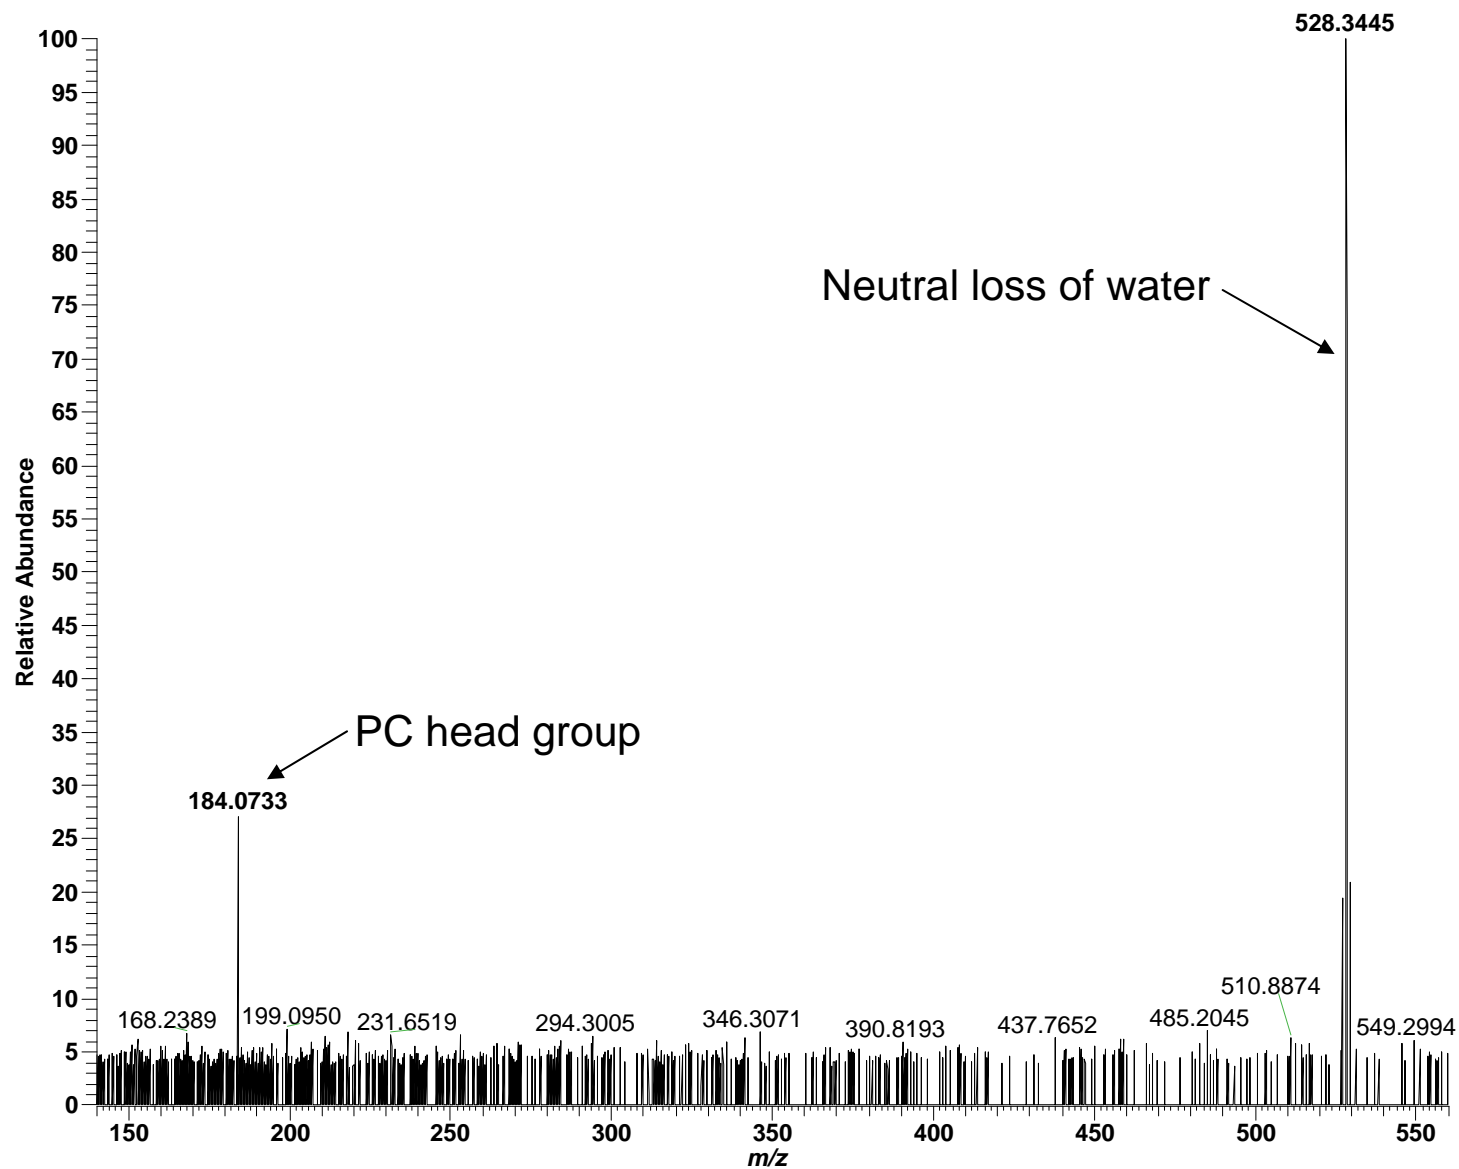

# High mass measurement accuracy MS/MS utilizing LTQ-FT

Negative ESI: LPC 20:3;  $C_{28}H_{52}NO_7P$ ; theoretical  $m/z$  604.3614,  $(M+CH_3COO)^-$

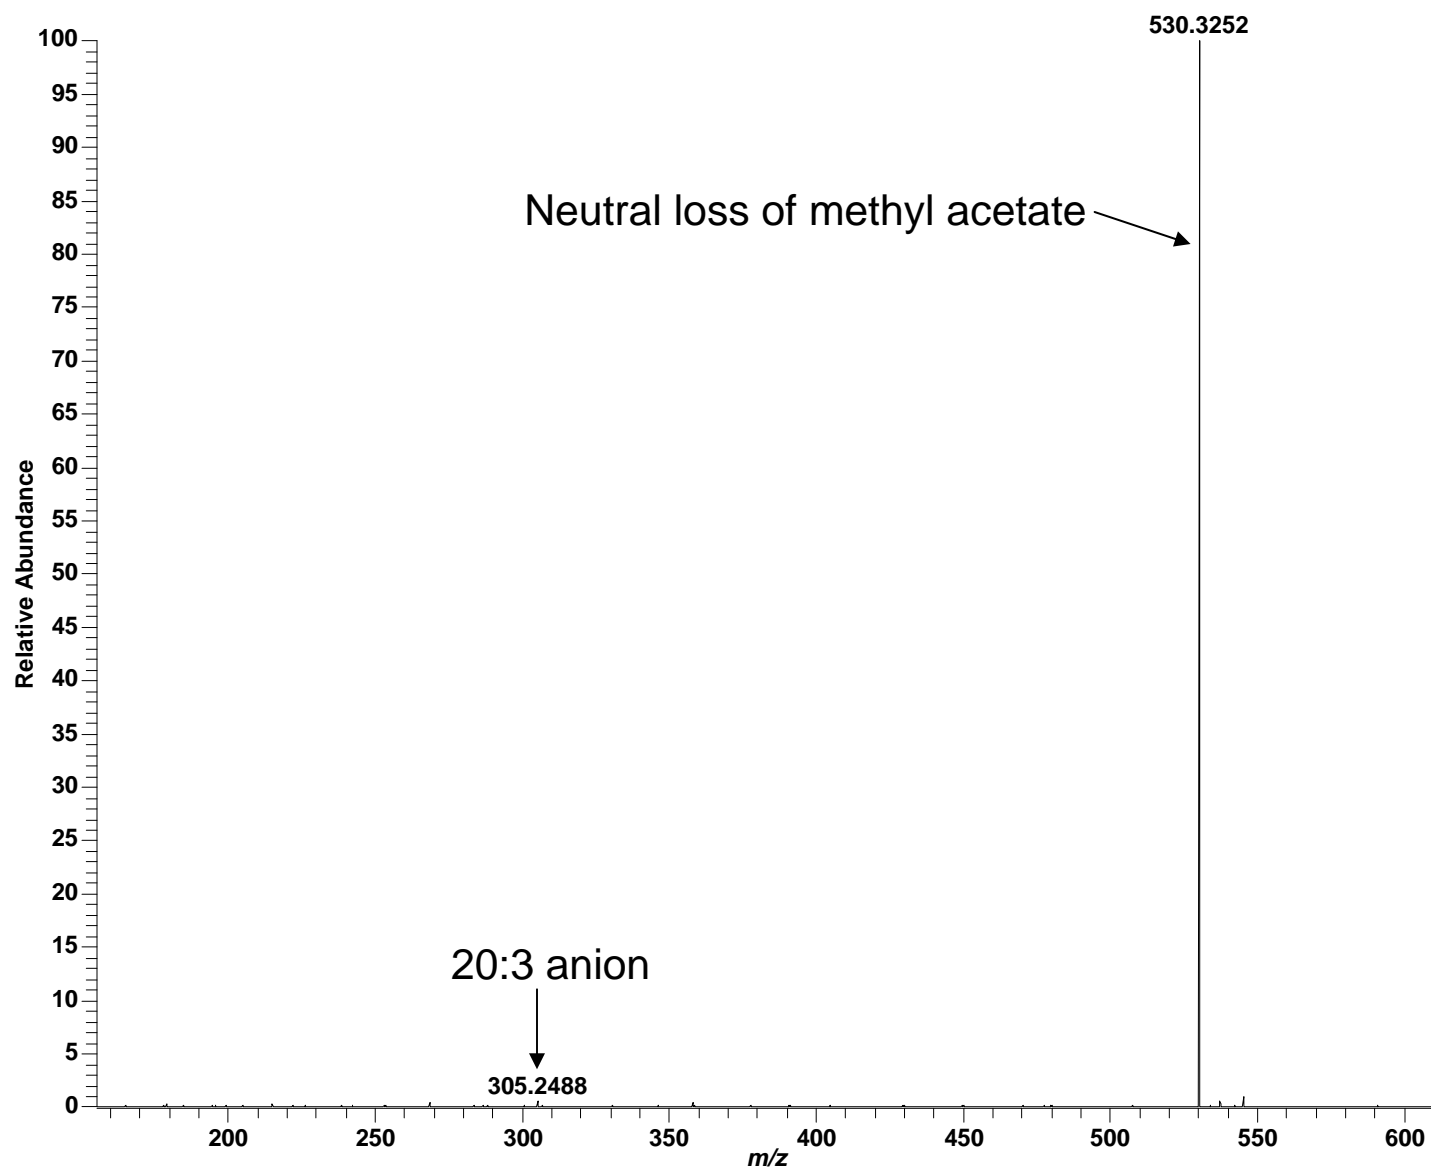

# High mass measurement accuracy MS/MS utilizing LTQ-FT

Positive ESI: LPC 18:1;  $C_{26}H_{52}NO_7P$ ; theoretical  $m/z$  522.3559,  $(M+H)^+$

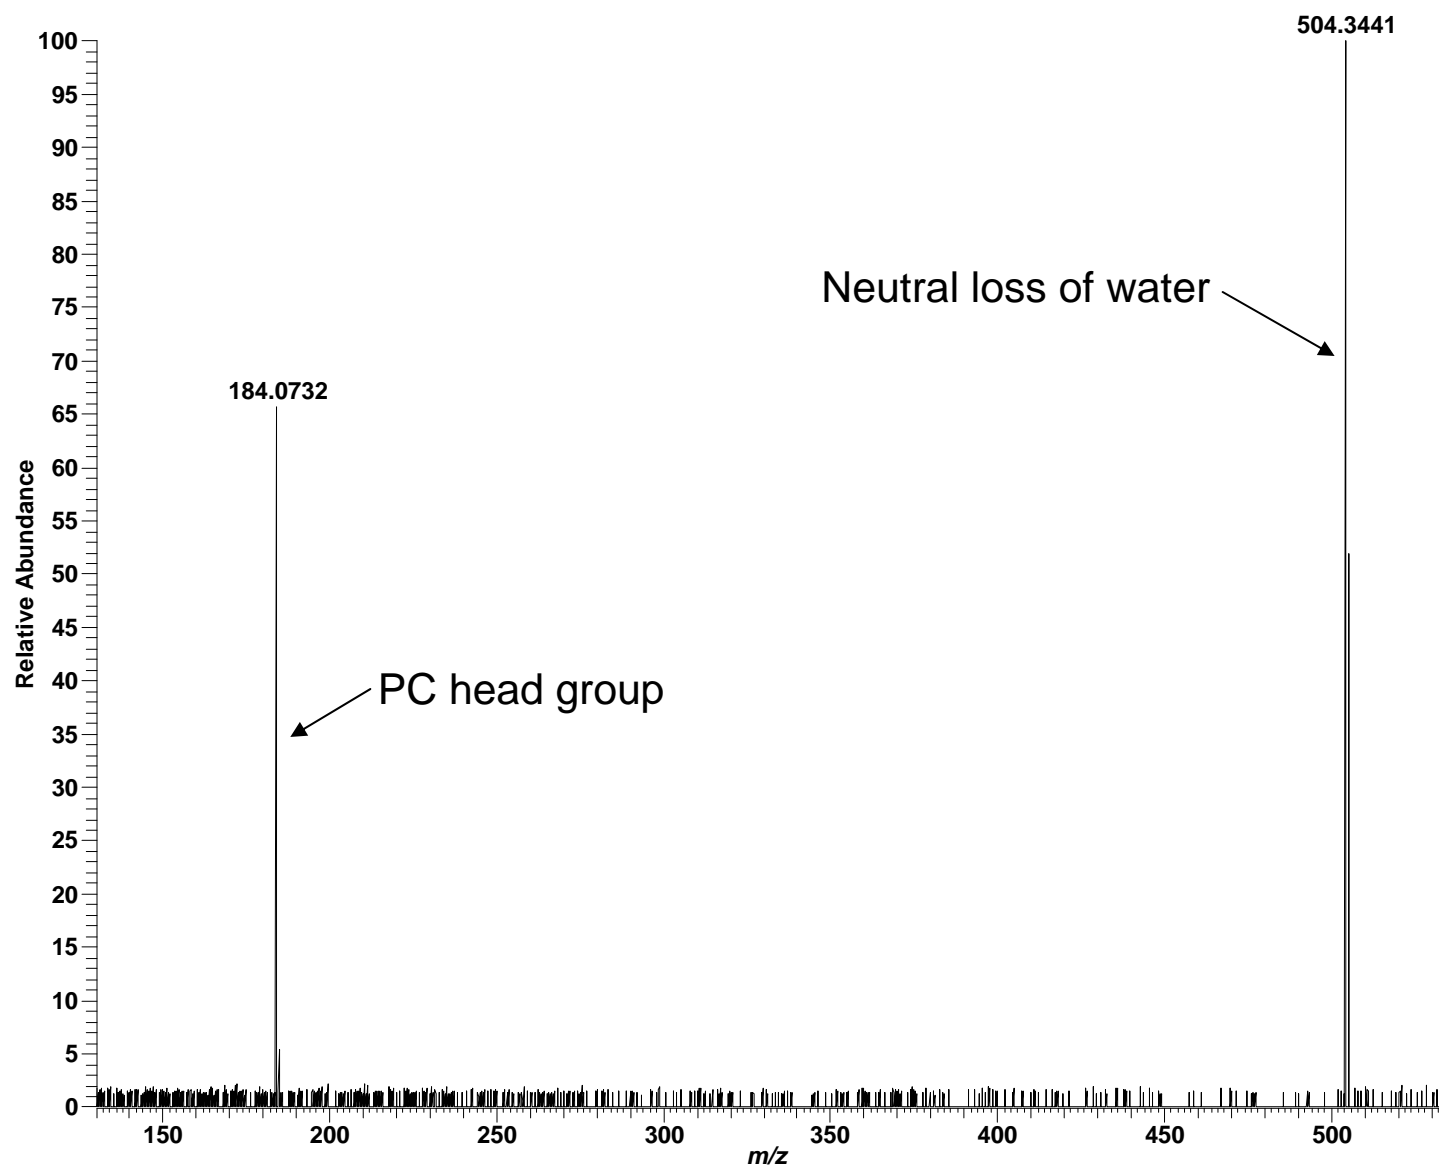

# High mass measurement accuracy MS/MS utilizing LTQ-FT

Negative ESI: LPC 18:1;  $C_{26}H_{52}NO_7P$ ; theoretical  $m/z$  580.3614,  $(M+CH_3COO)^-$

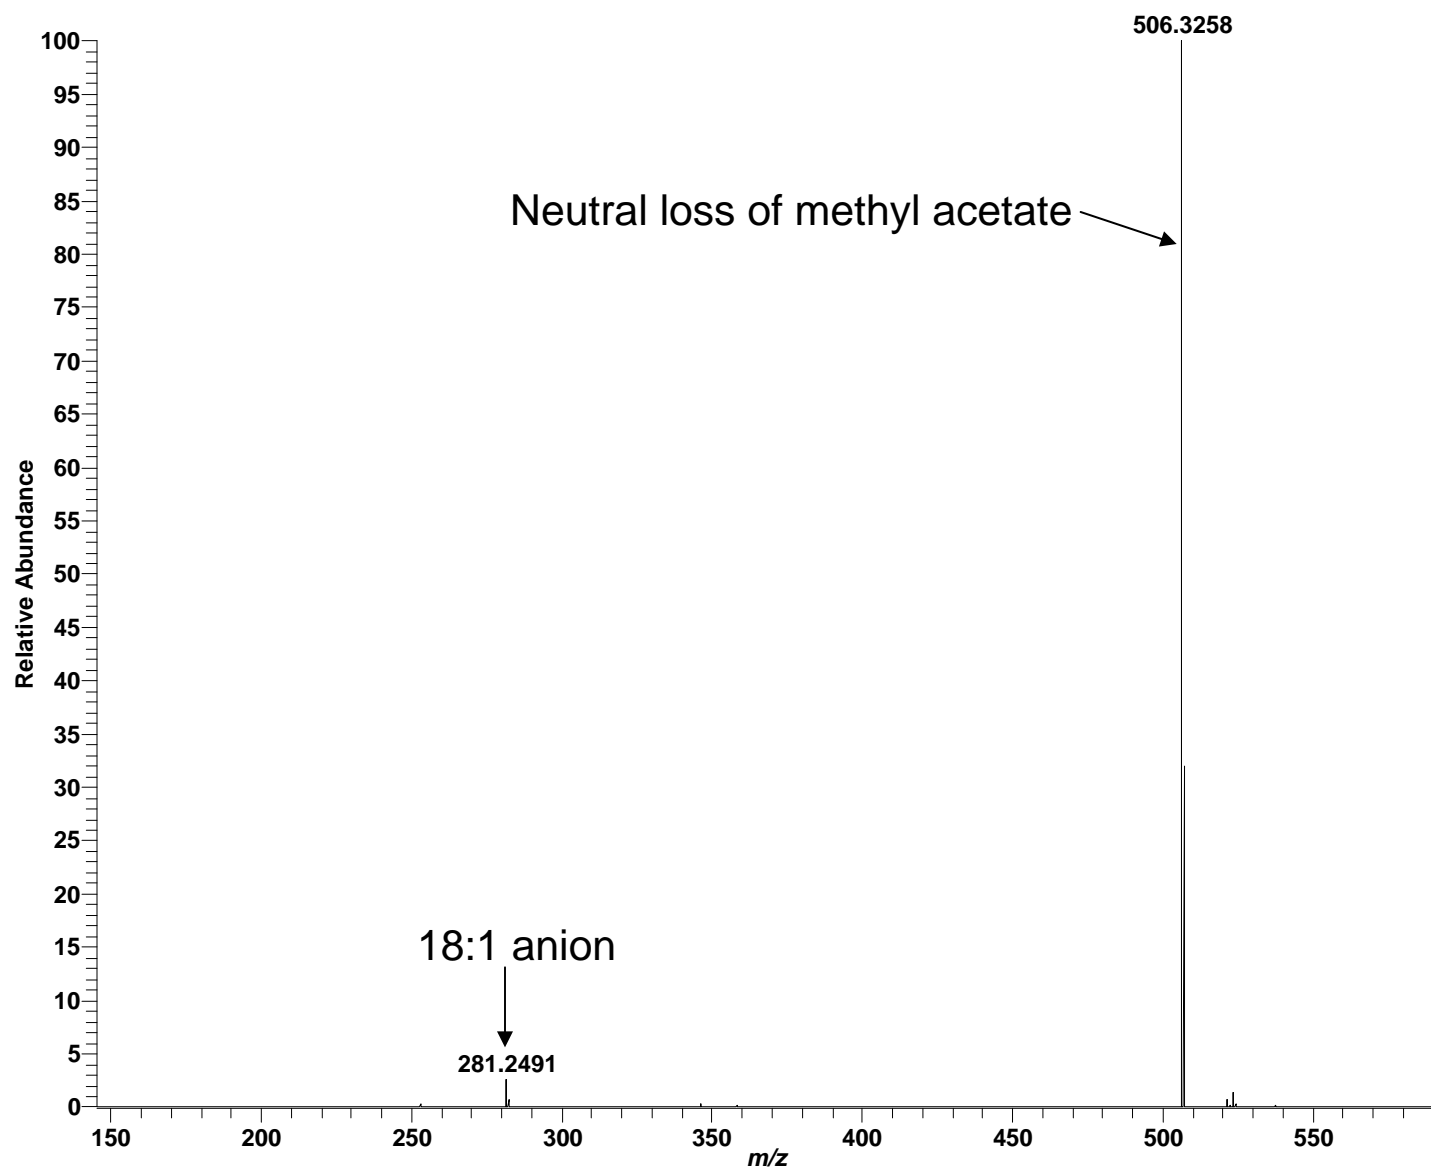

# High mass measurement accuracy MS/MS utilizing LTQ-FT

Positive ESI: LPC 17:0;  $C_{25}H_{52}NO_7P$ ; theoretical  $m/z$  510.3559,  $(M+H)^+$

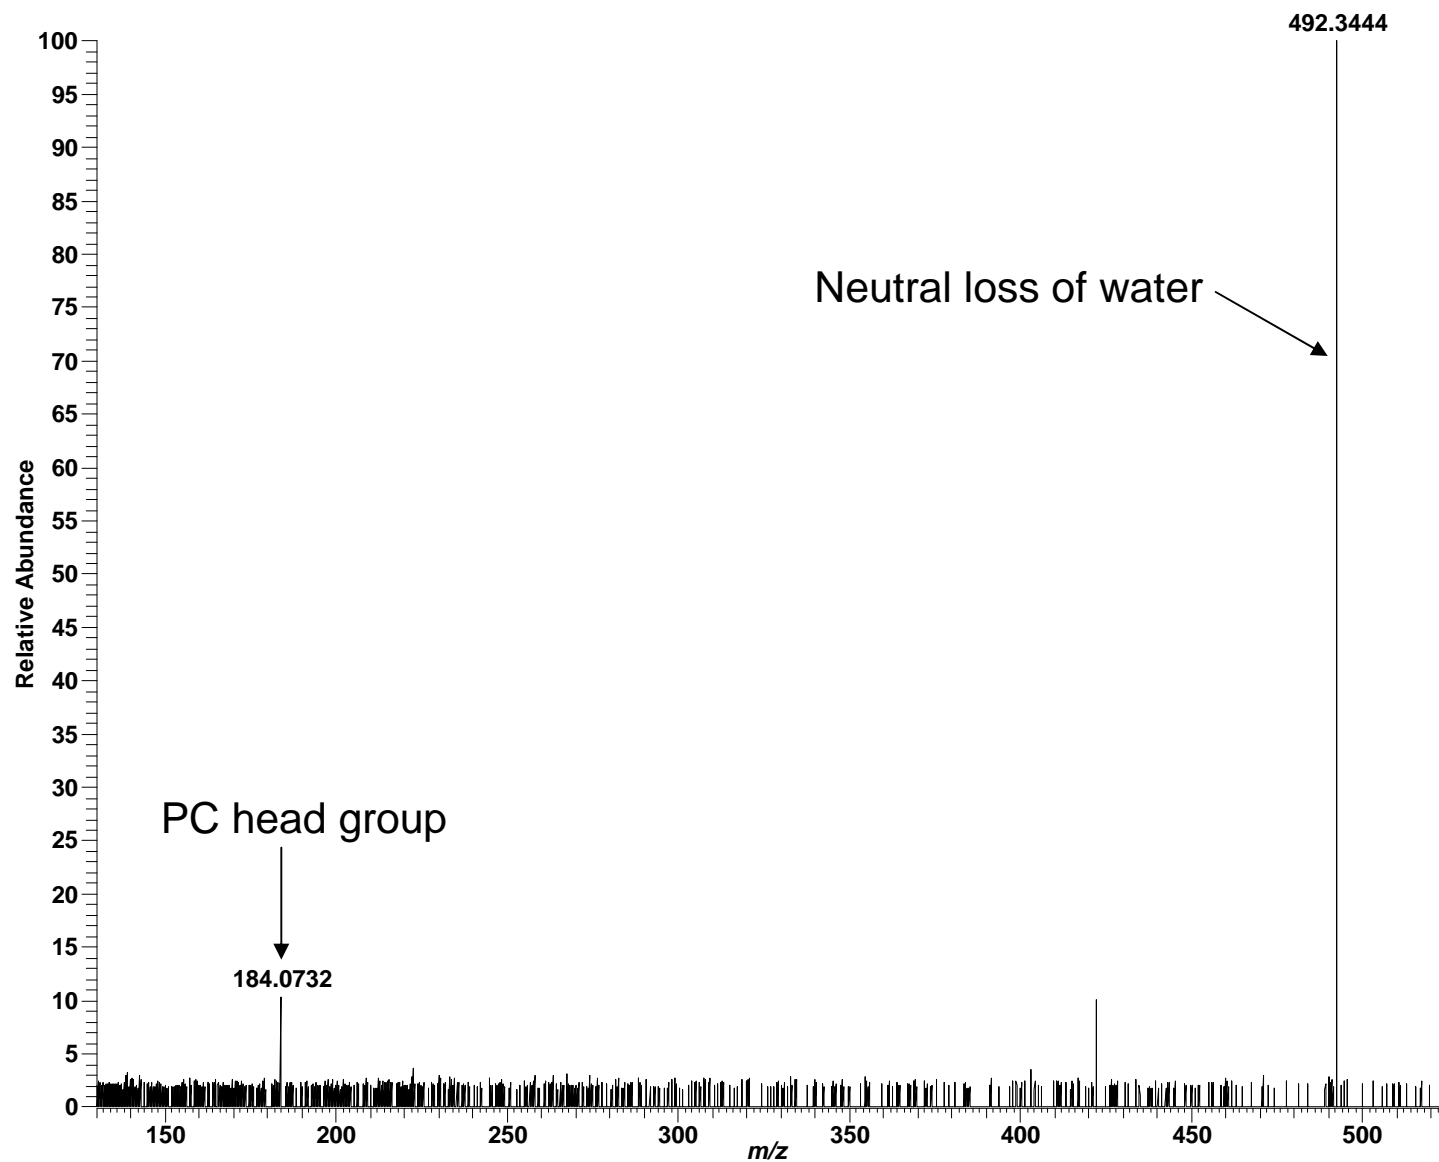

# High mass measurement accuracy MS/MS utilizing LTQ-FT

Negative ESI: LPC 17:0;  $C_{25}H_{52}NO_7P$ ; theoretical  $m/z$  568.3614,  $(M+CH_3COO)^-$

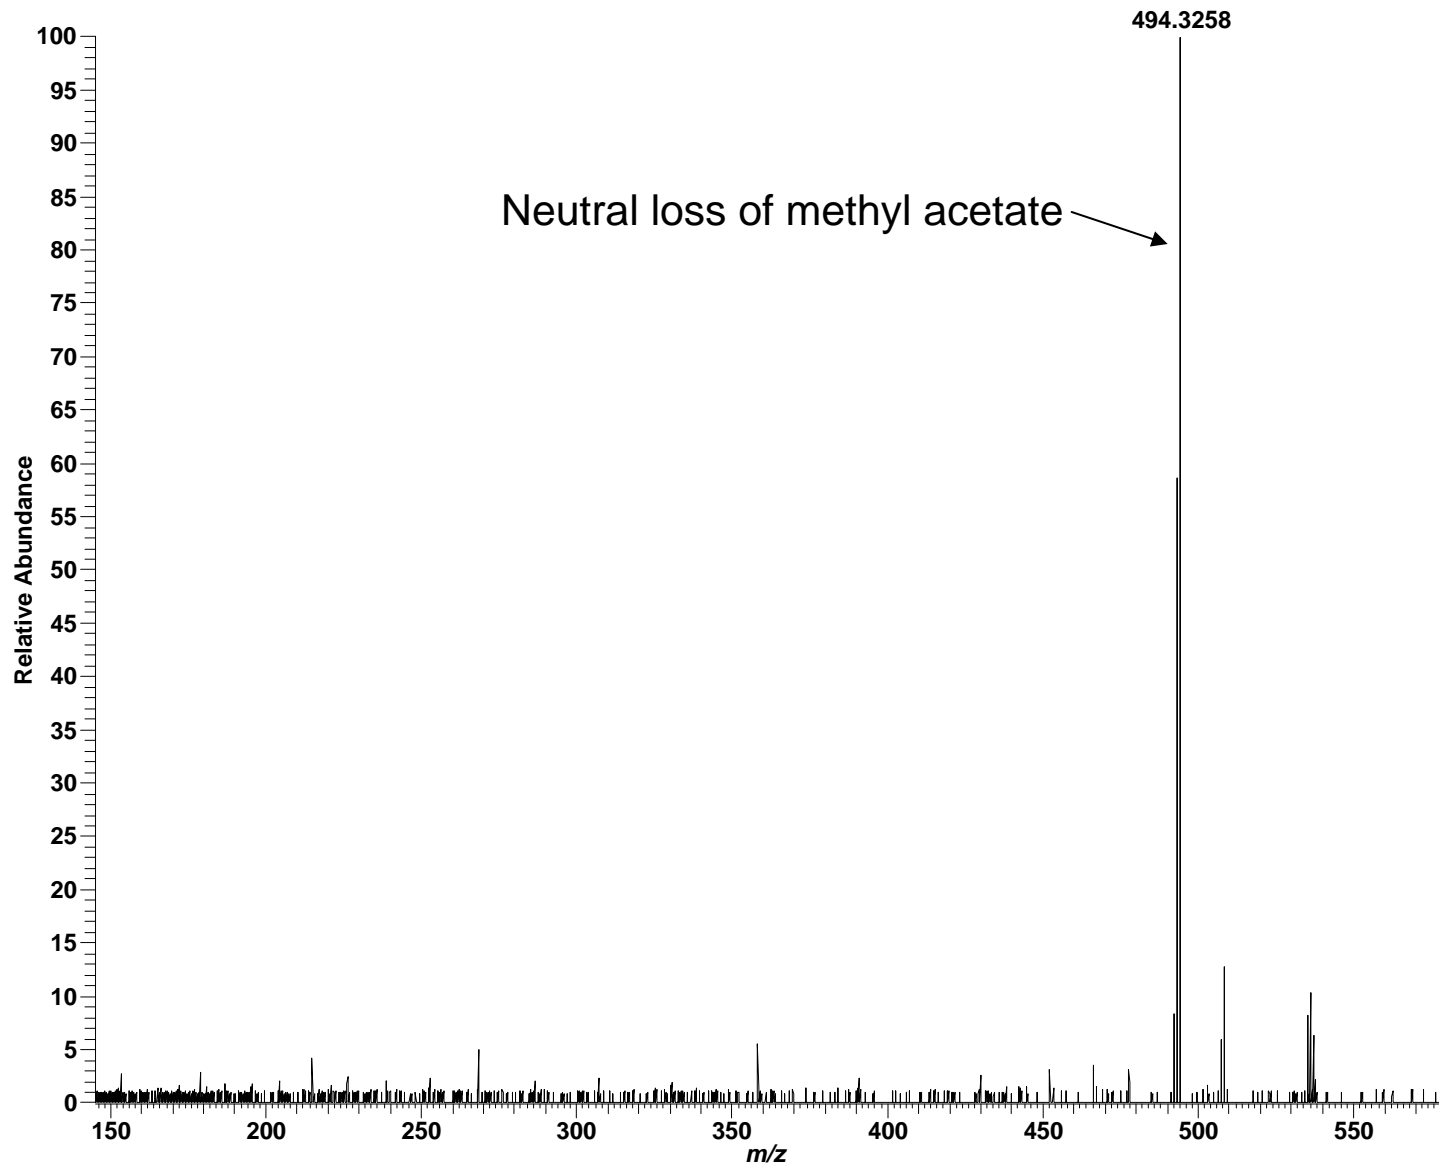

# High mass measurement accuracy MS/MS utilizing LTQ-FT

Positive ESI: LPC 18:0;  $C_{26}H_{54}NO_7P$ ; theoretical  $m/z$  524.3716, (M+H)<sup>+</sup>

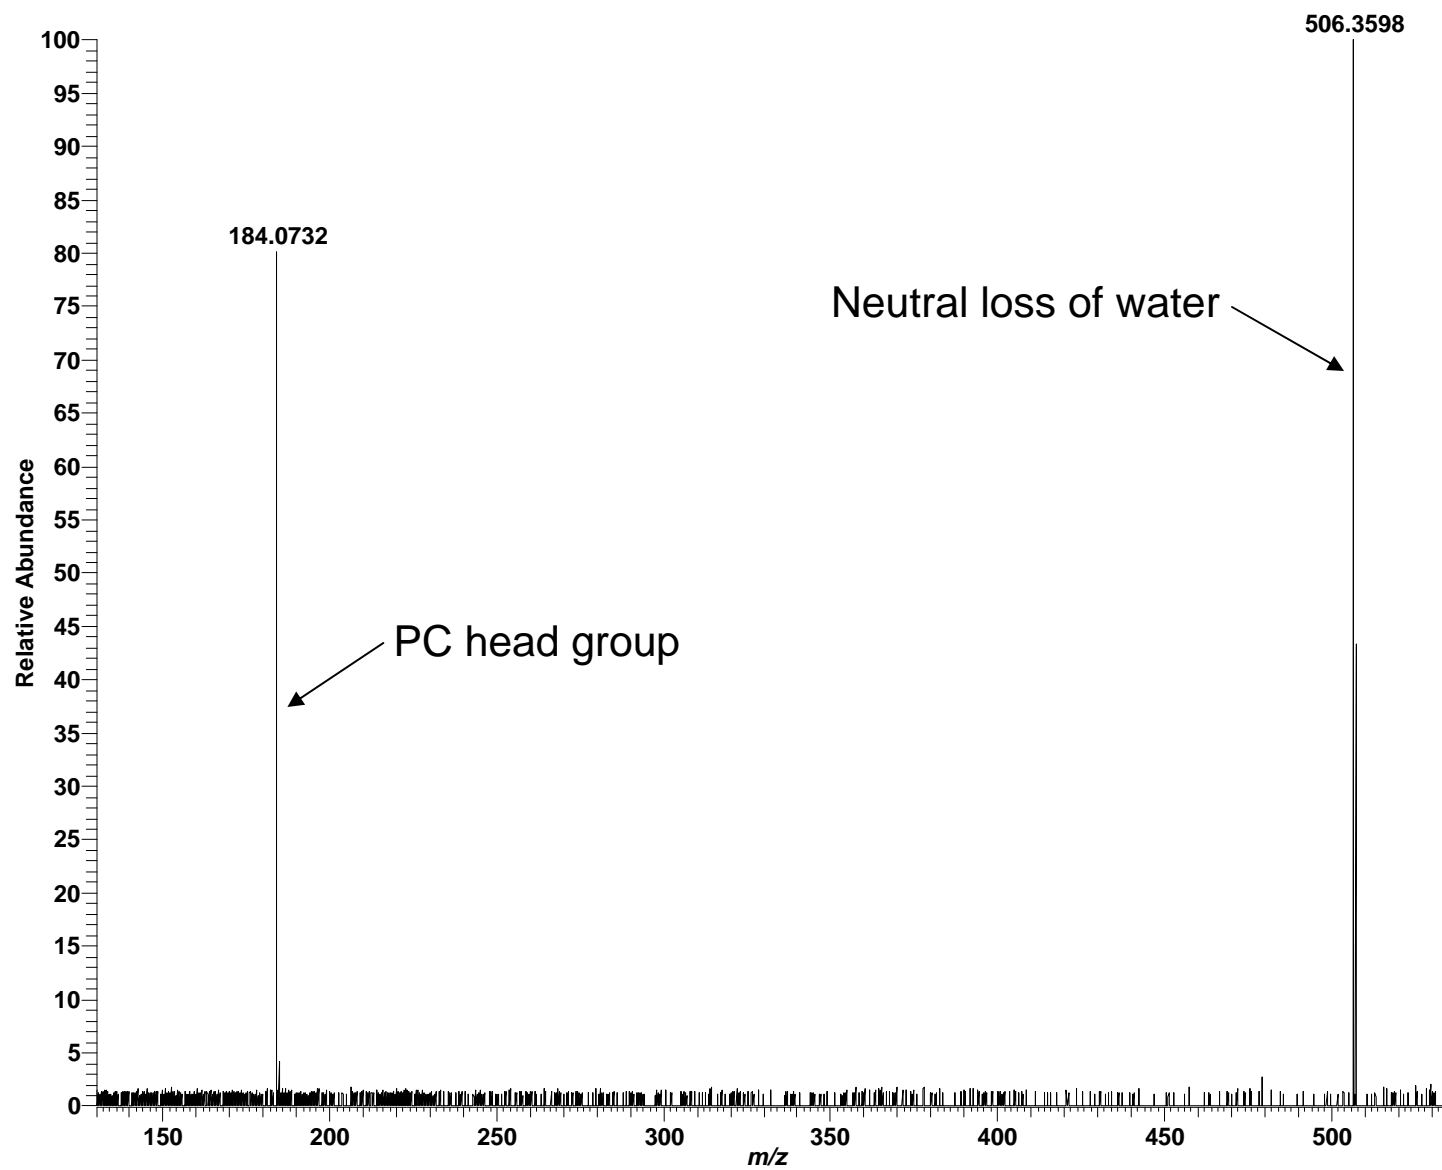

# High mass measurement accuracy MS/MS utilizing LTQ-FT

Negative ESI: LPC 18:0;  $C_{26}H_{54}NO_7P$ ; theoretical  $m/z$  582.3771,  $(M+CH_3COO)^-$

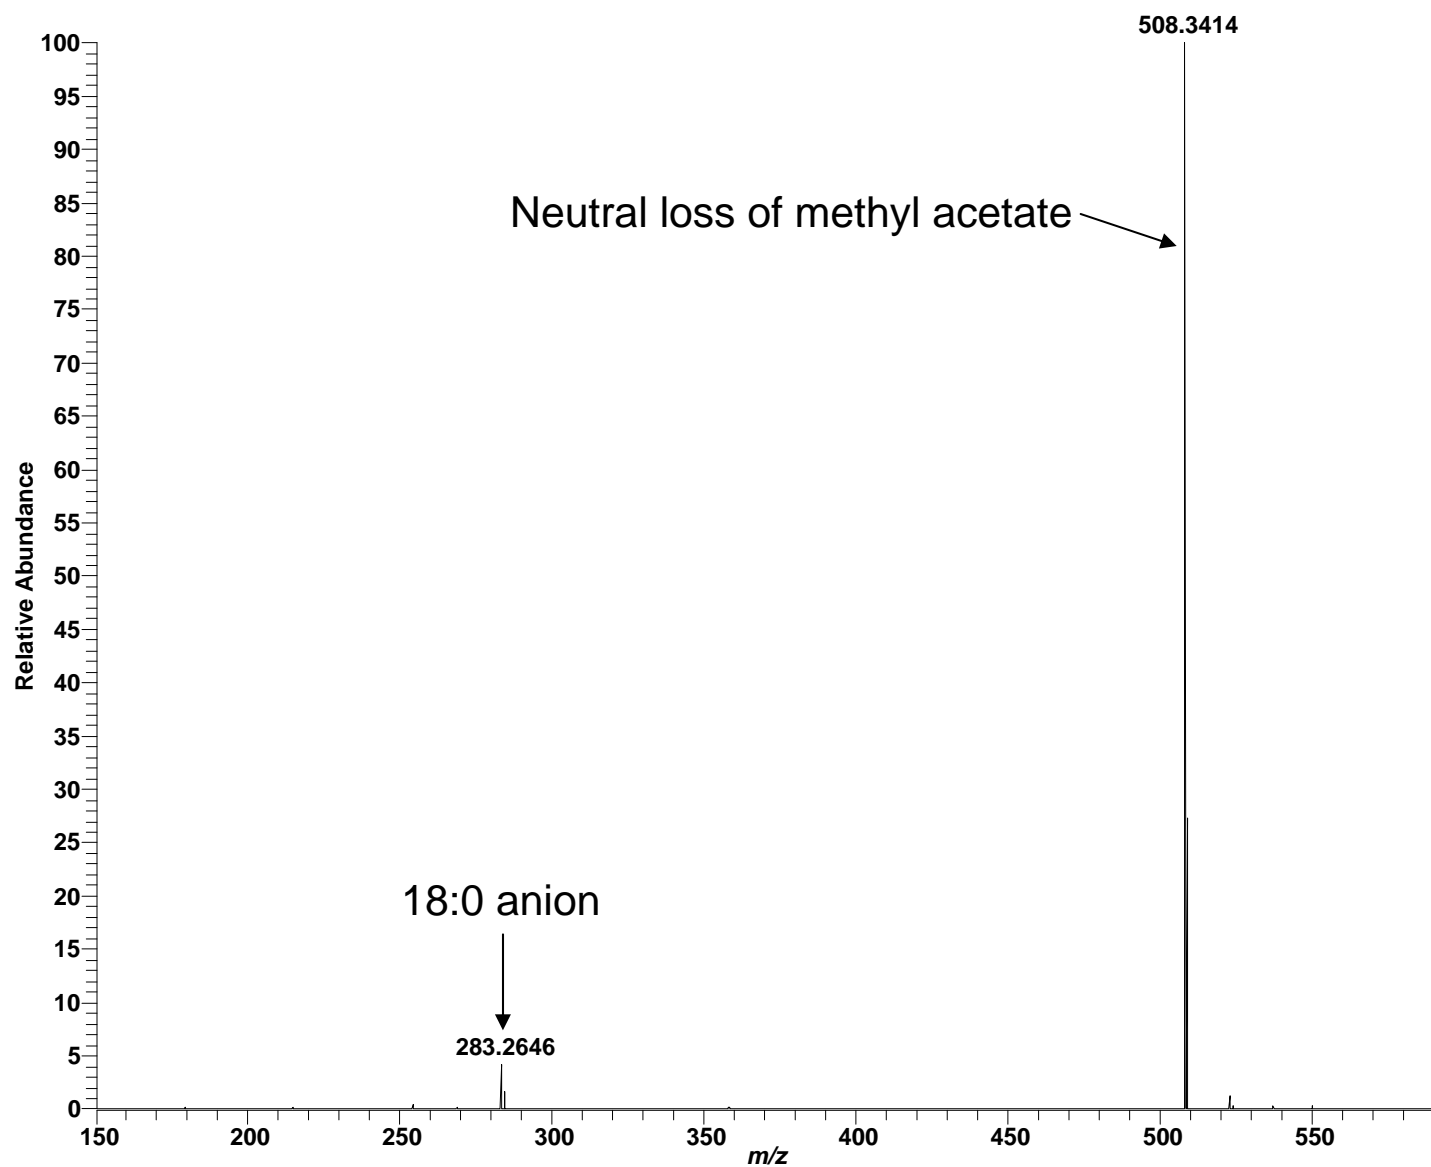



# High mass measurement accuracy MS/MS utilizing LTQ-FT

Positive ESI: Oxidized PC 16:0/9:0-hydroxy;  $C_{33}H_{64}NO_9P$ ; theoretical  $m/z$  650.4397,  $(M+H)^+$

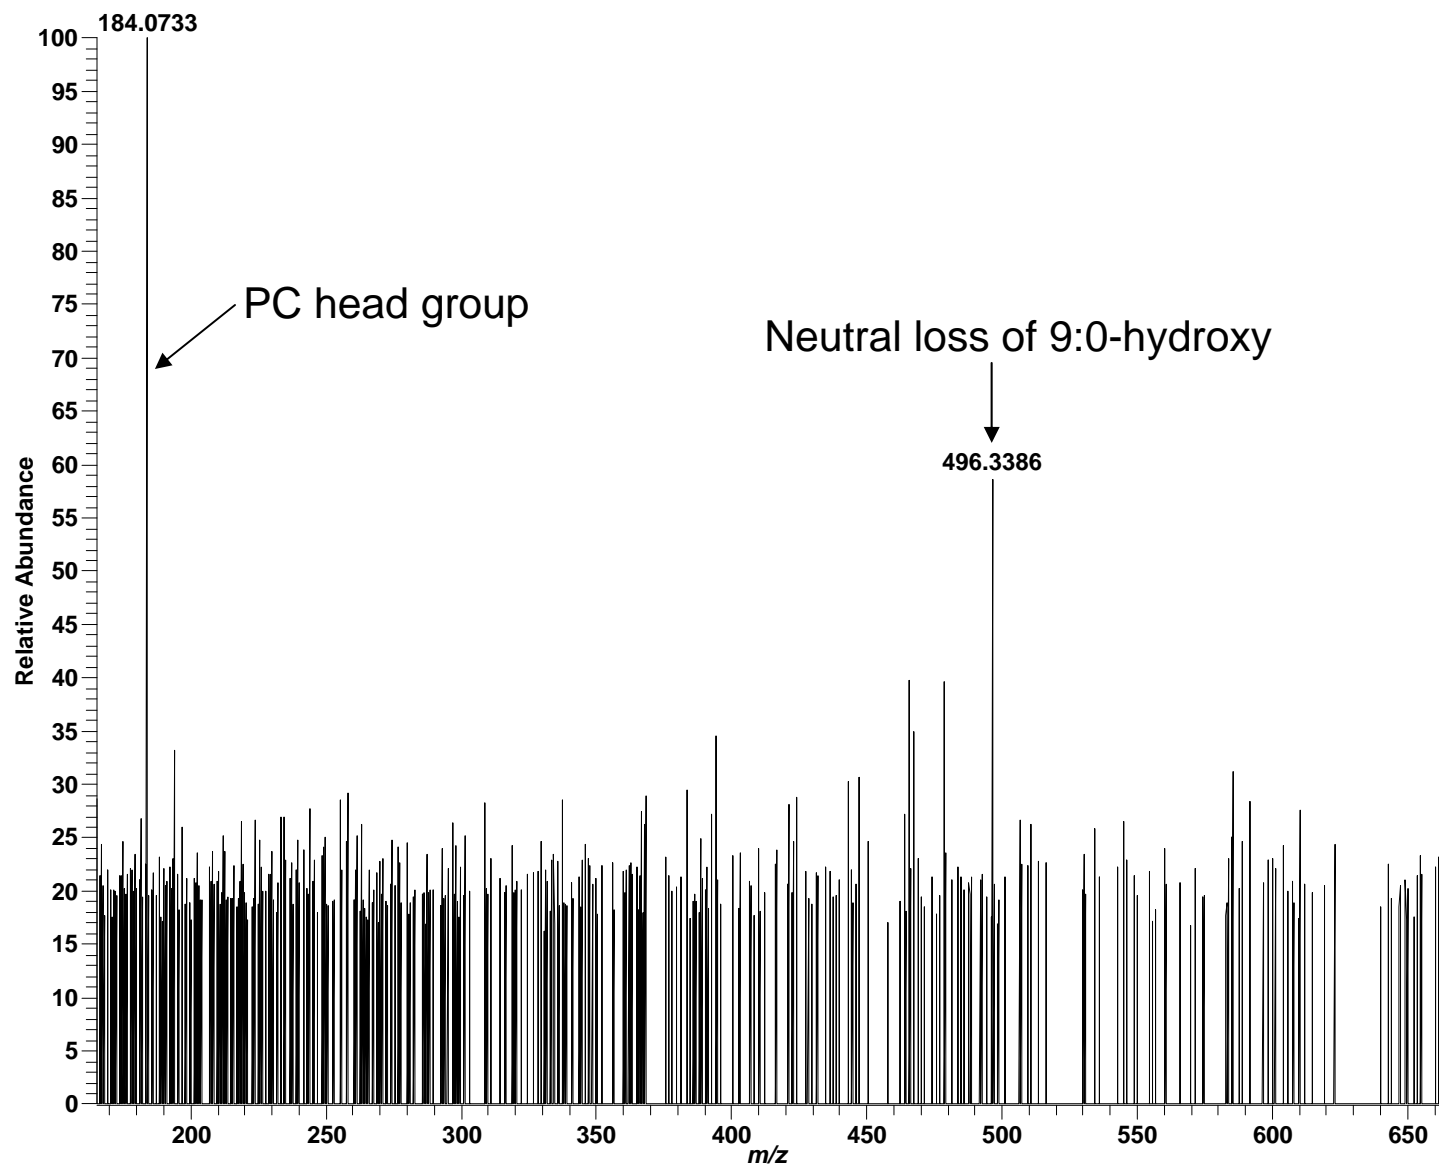

High mass measurement accuracy MS/MS utilizing LTQ-FT

Positive ESI: PC 18:2/18:2;  $C_{44}H_{80}NO_8P$ ; theoretical  $m/z$  782.5699,  $(M+H)^+$

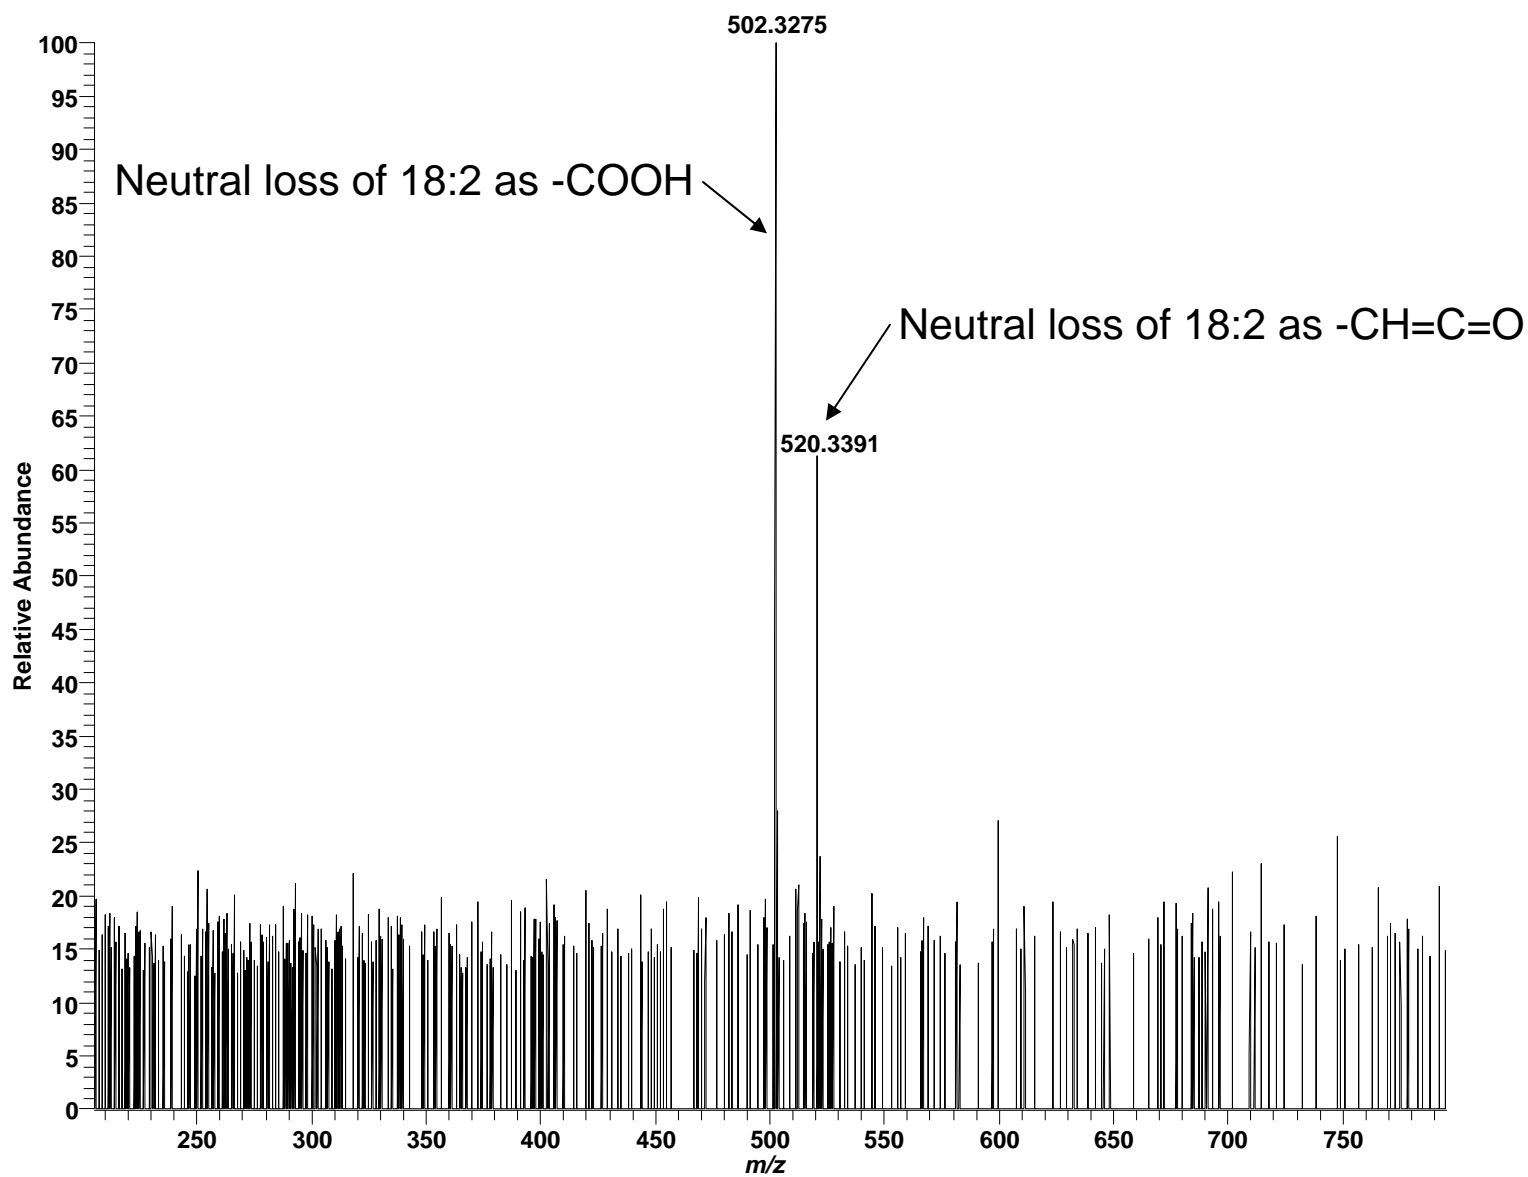

# High mass measurement accuracy MS/MS utilizing LTQ-FT

Positive ESI: PC 16:0/22:6;  $C_{46}H_{80}NO_8P$ ; theoretical  $m/z$  806.5699,  $(M+H)^+$

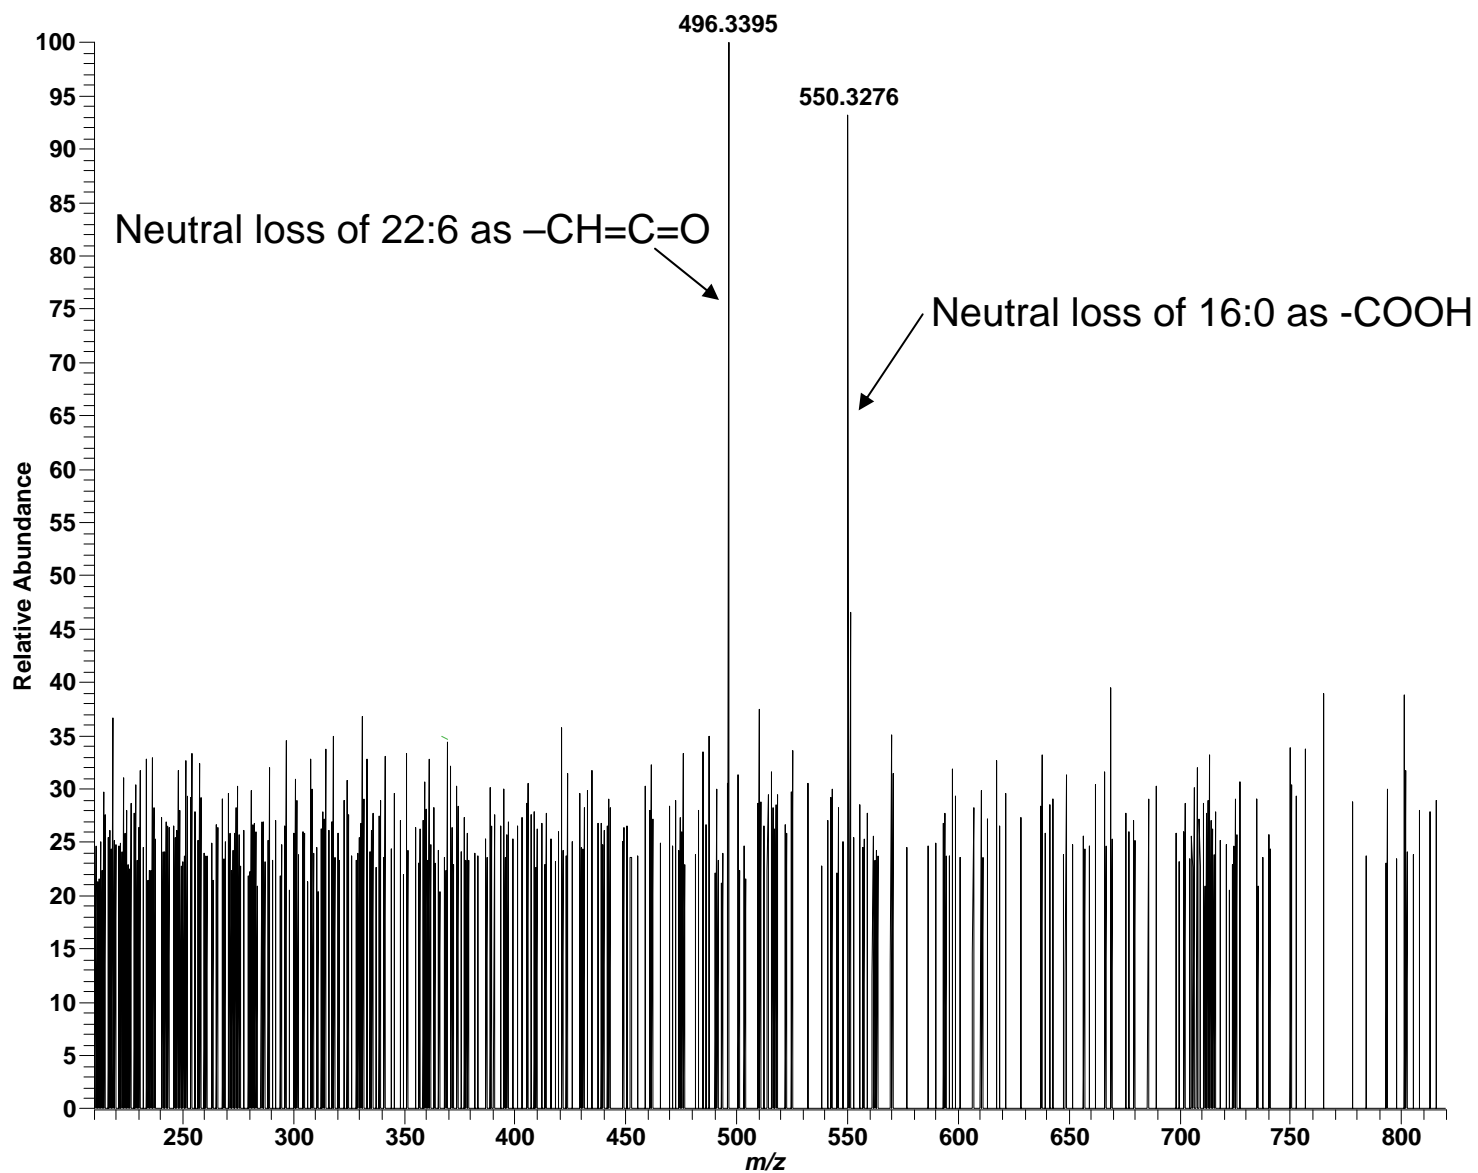

# High mass measurement accuracy MS/MS utilizing LTQ-FT

Negative ESI: PC 16:0/22:6;  $C_{46}H_{80}NO_8P$ ; theoretical  $m/z$  864.5754,  $(M+CH_3COO)^-$

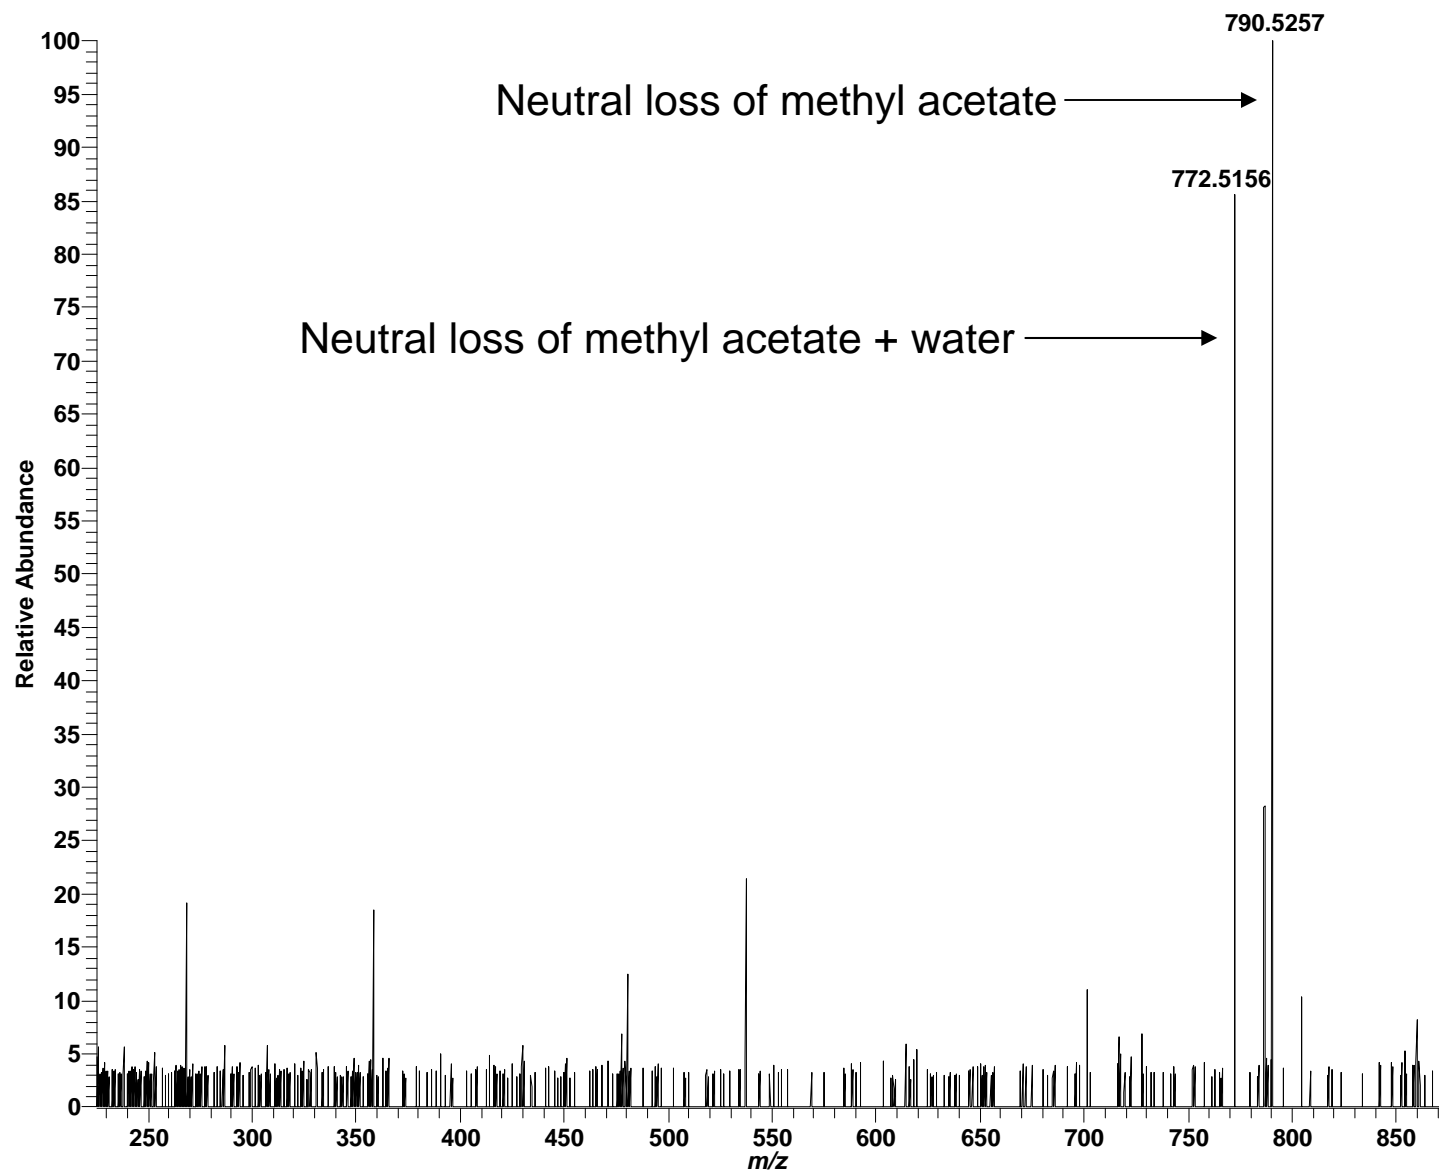

# High mass measurement accuracy MS/MS utilizing LTQ-FT

Positive ESI: PC 18:1/18:2;  $C_{44}H_{82}NO_8P$ ; theoretical  $m/z$  784.5856,  $(M+H)^+$

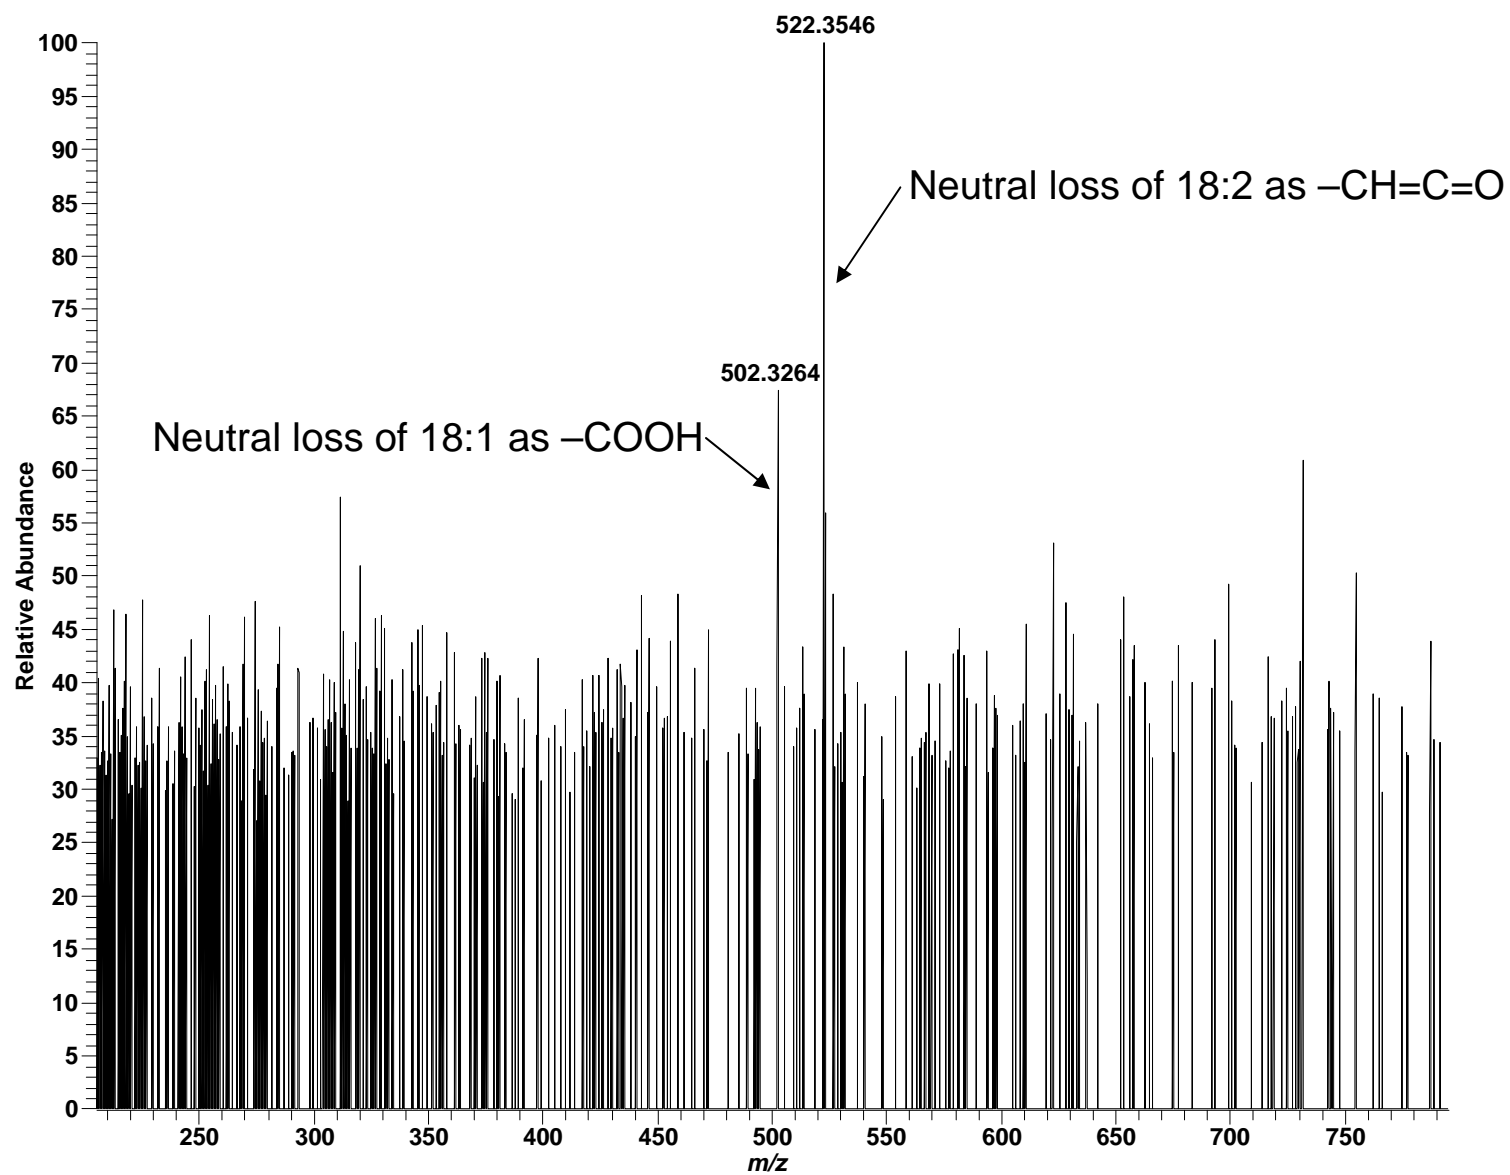

# High mass measurement accuracy MS/MS utilizing LTQ-FT

Positive ESI: PC 18:0/22:6;  $C_{48}H_{84}NO_8P$ ; theoretical  $m/z$  834.6013,  $(M+H)^+$

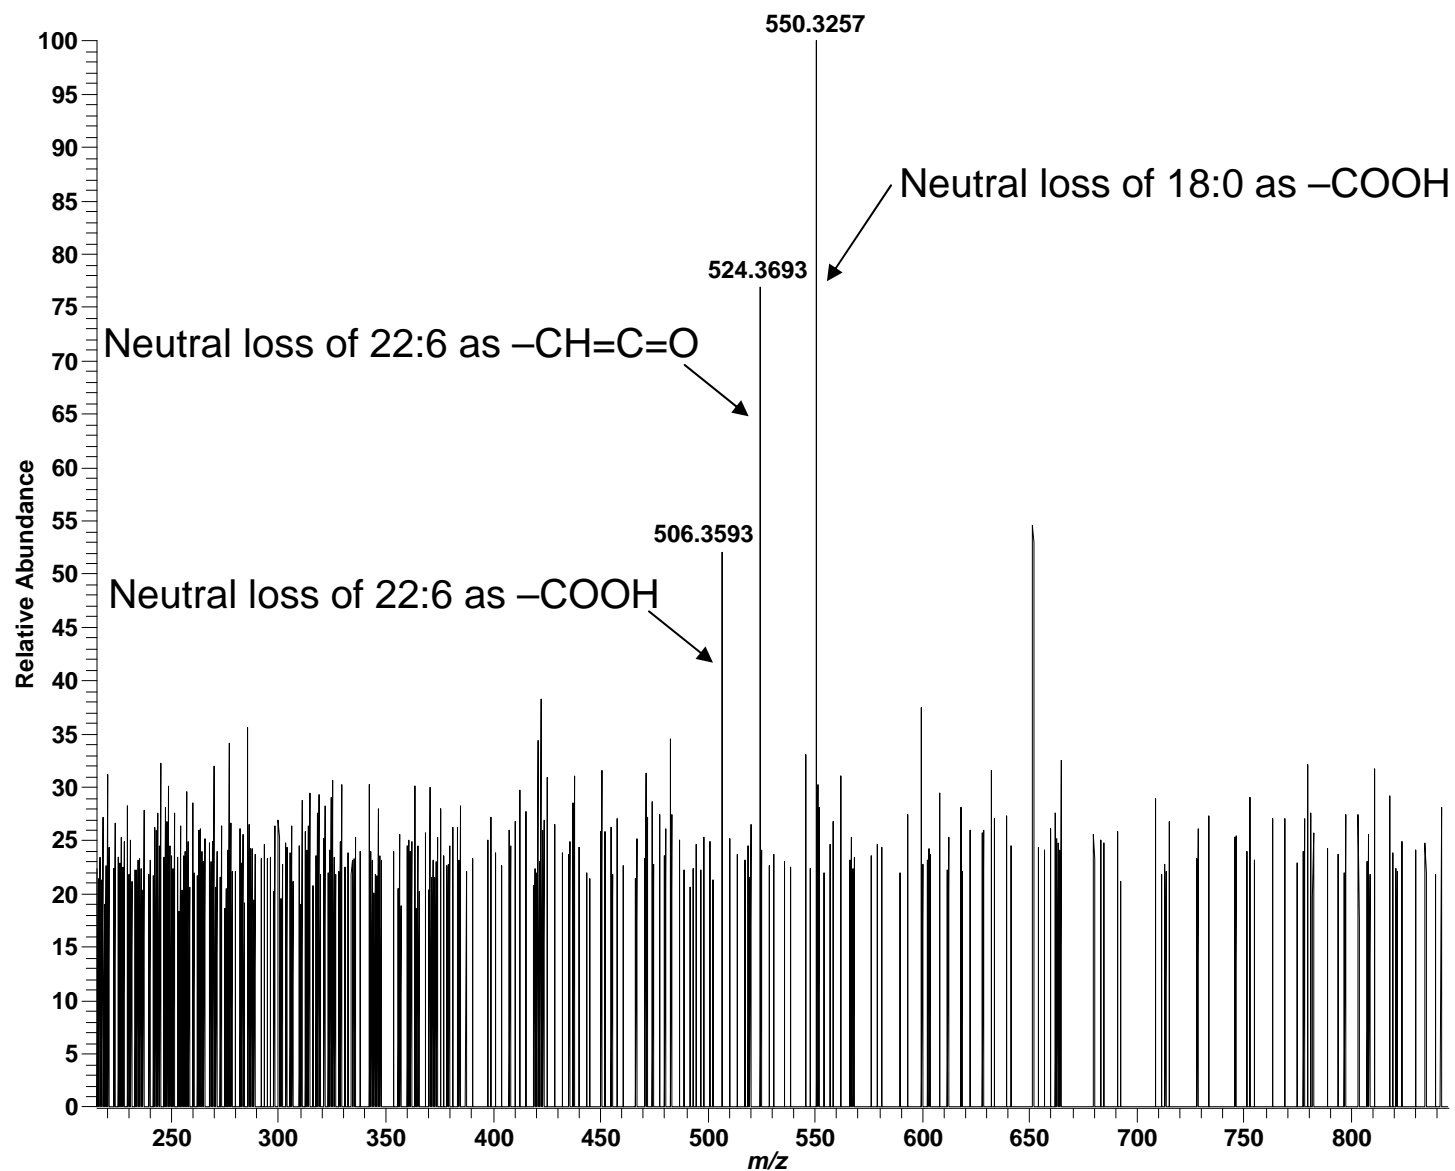

# Cholesterol and its esters

Characteristic daughter ion: 369.3521  
(Neutral loss of  $\text{NH}_4 + \text{OH}$ )

# High mass measurement accuracy MS/MS utilizing LTQ-FT

Positive ESI: Cholesterol;  $C_{27}H_{46}O$ ; theoretical  $m/z$  404.3892,  $(M+NH_4)^+$

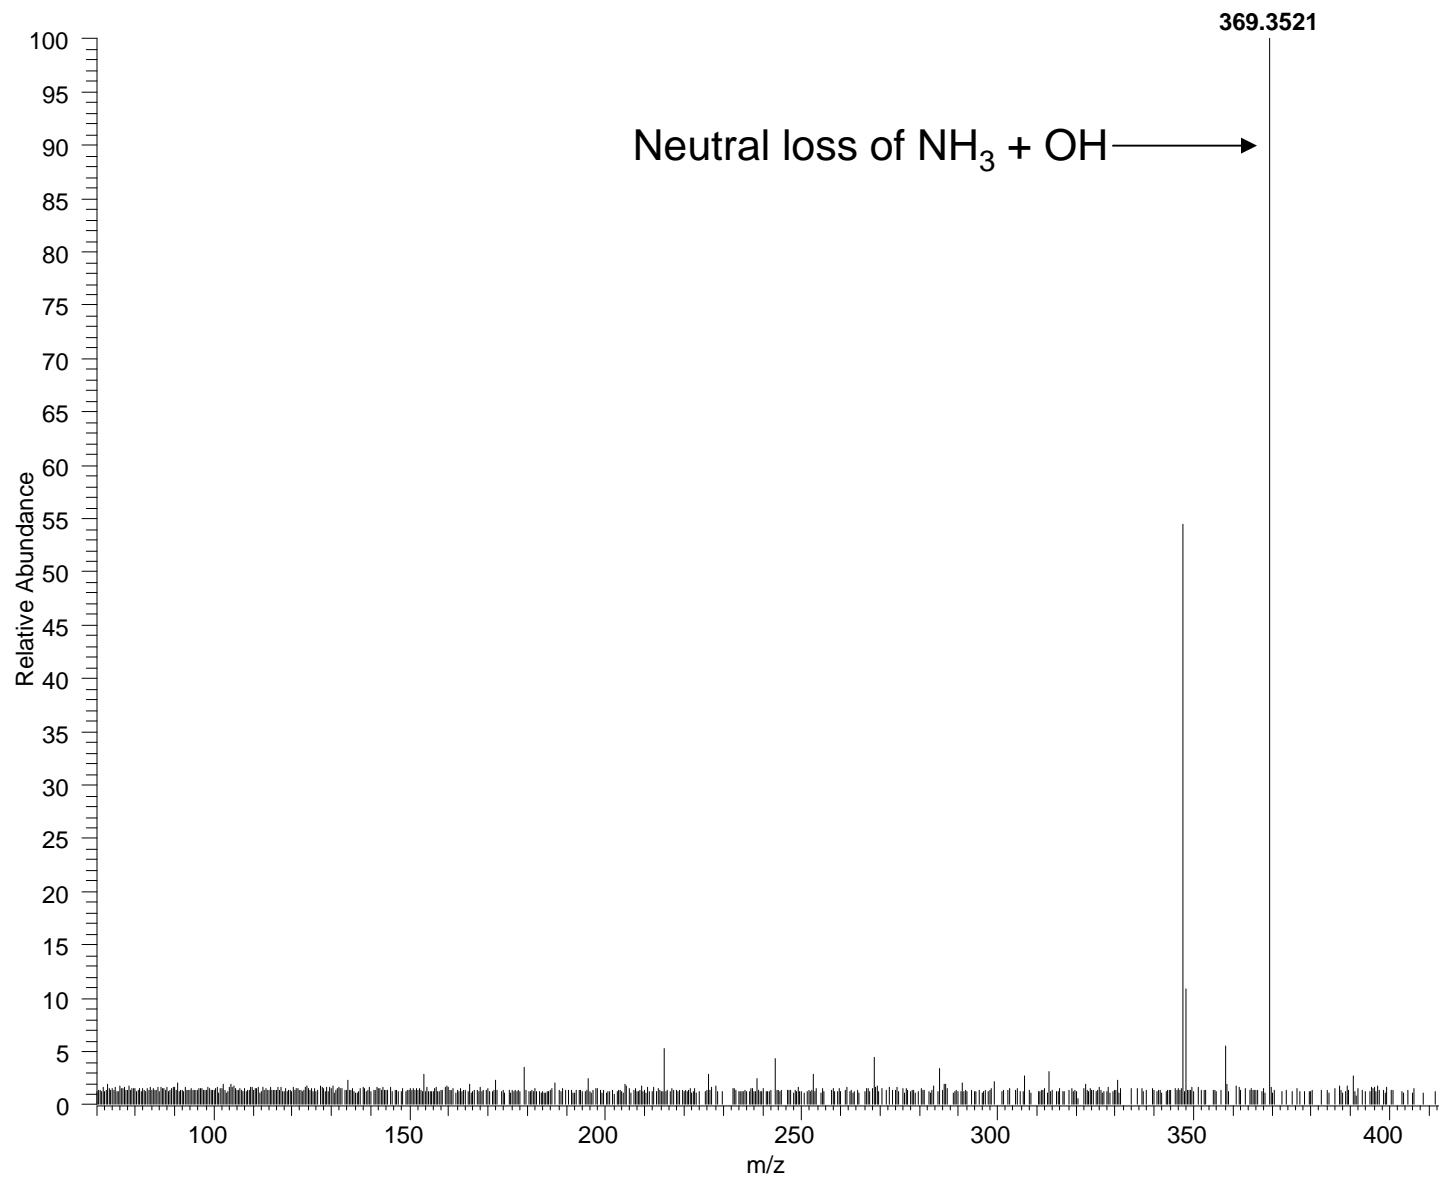



High mass measurement accuracy MS/MS utilizing LTQ-FT

Positive ESI: CE 20:5;  $C_{47}H_{74}O_2$ ; theoretical  $m/z$  688.6032,  $(M+NH_4)^+$

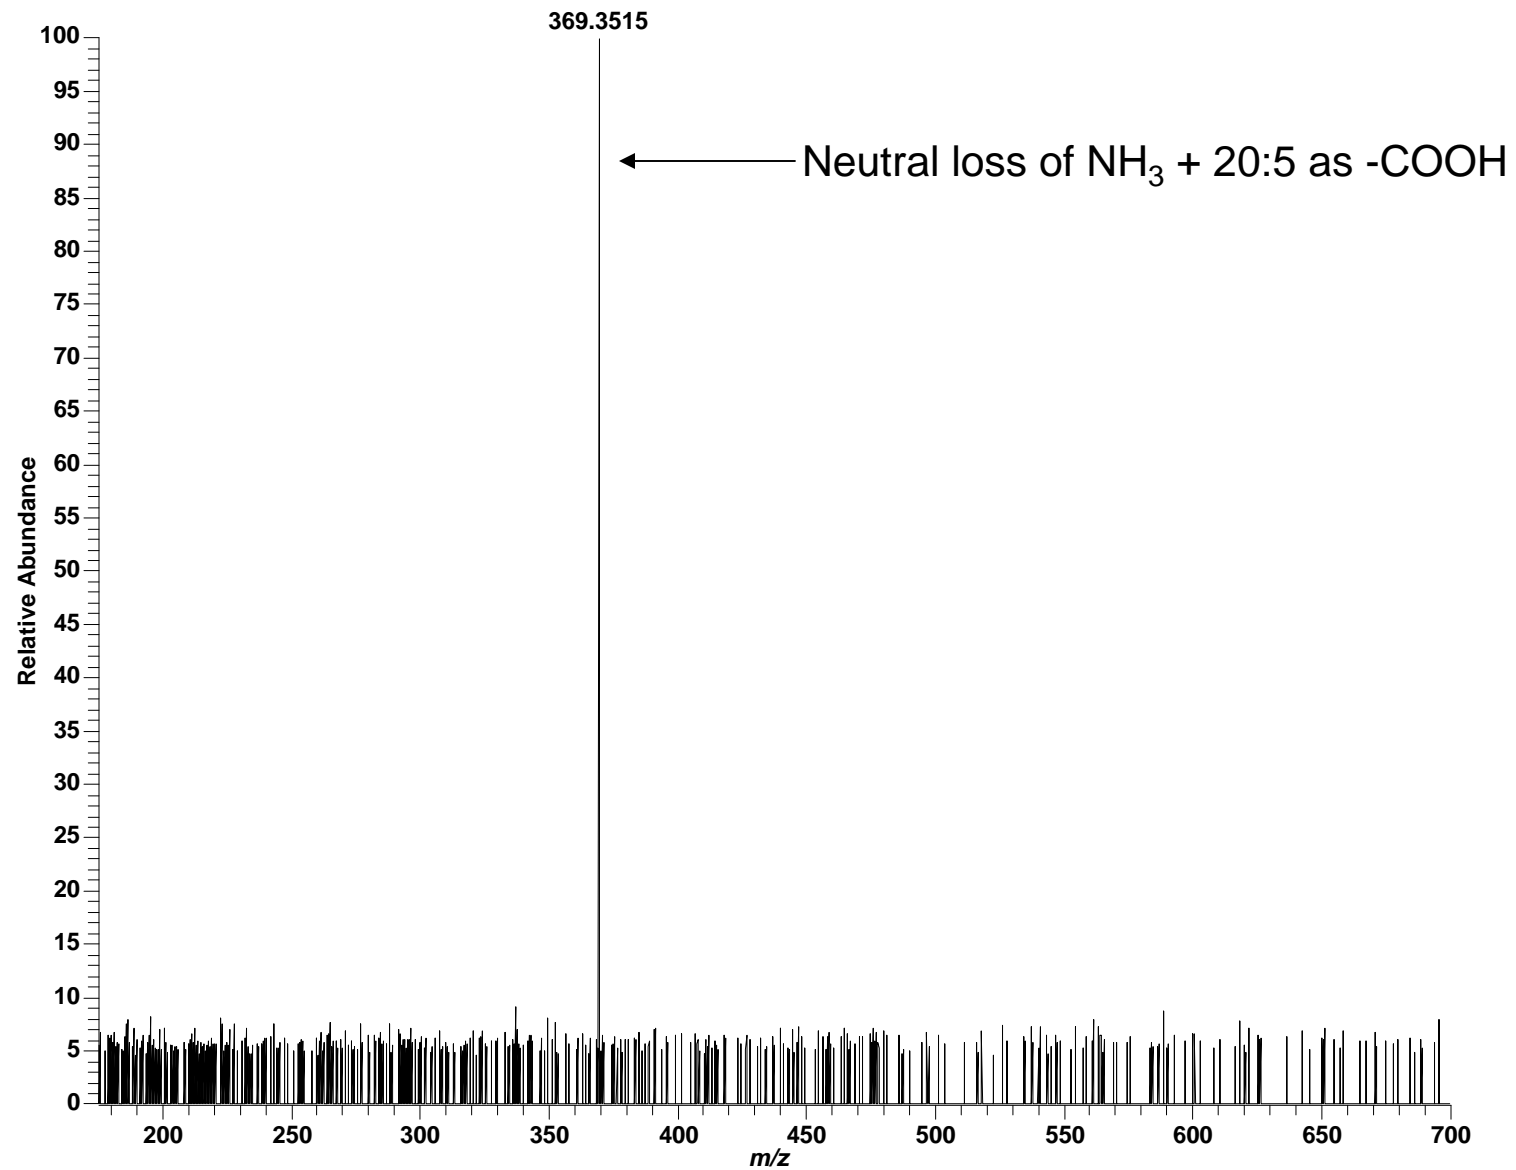

# High mass measurement accuracy MS/MS utilizing LTQ-FT

Positive ESI: CE 20:4;  $C_{47}H_{76}O_2$ ; theoretical  $m/z$  690.6189,  $(M+NH_4)^+$

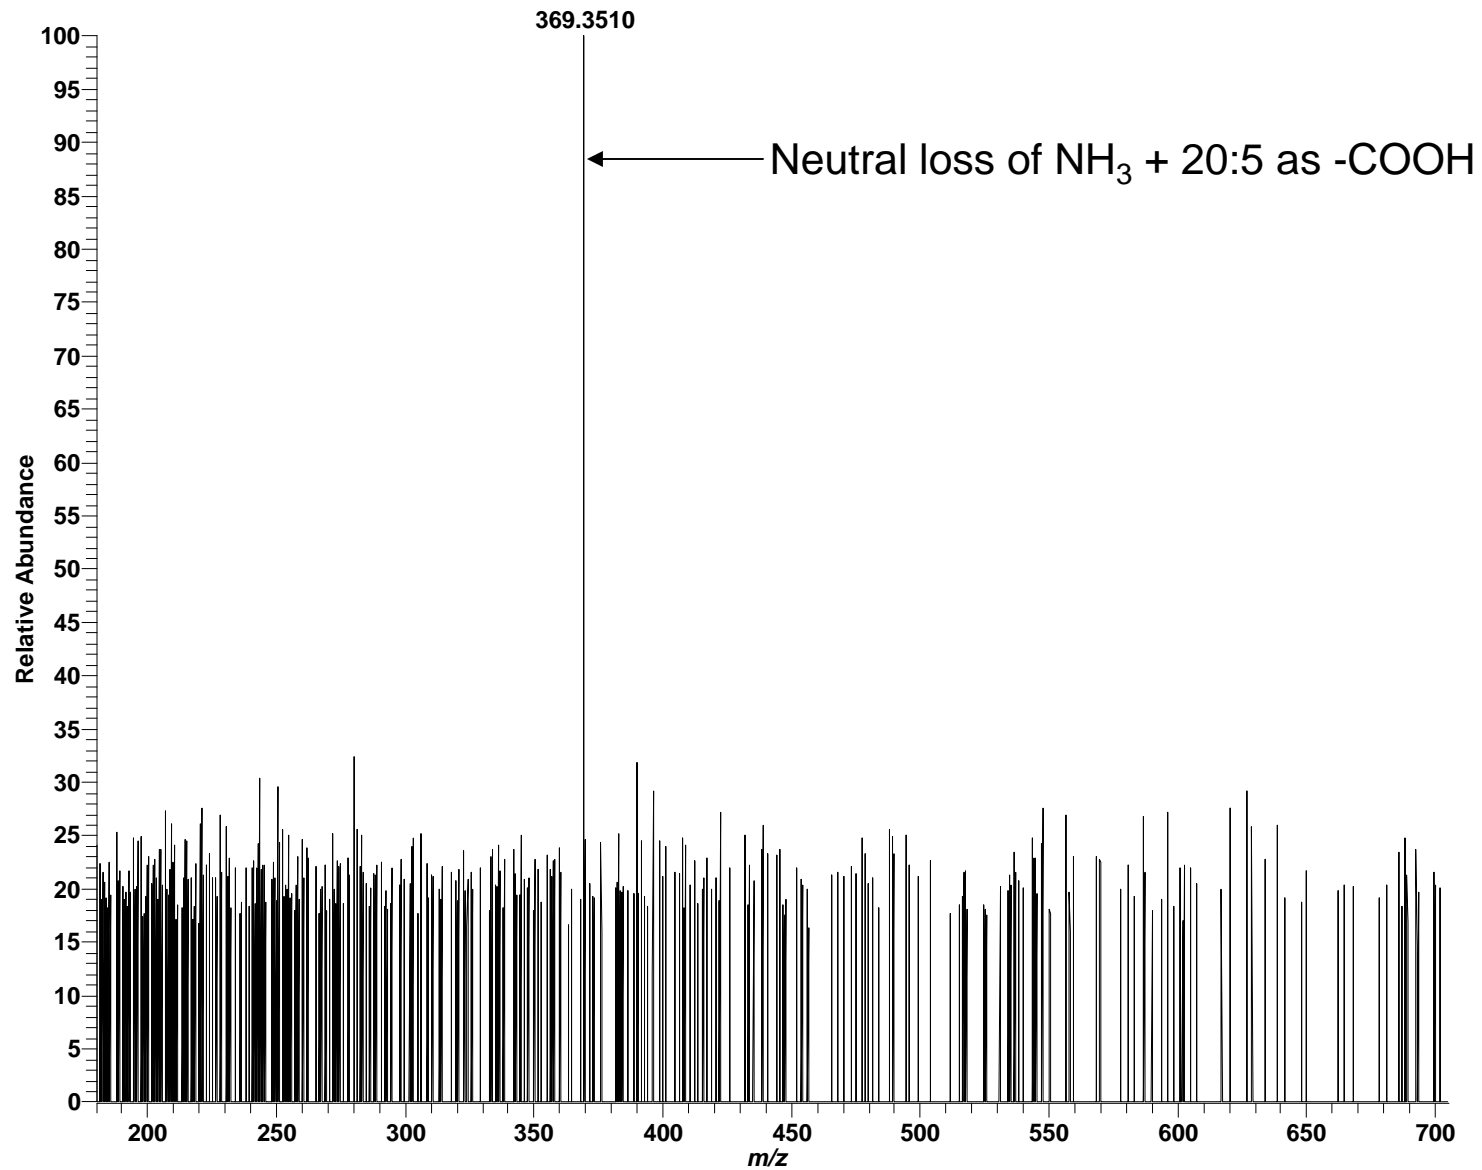

# High mass measurement accuracy MS/MS utilizing LTQ-FT

Positive ESI: CE 18:3; C<sub>45</sub>H<sub>74</sub>O<sub>2</sub>; theoretical *m/z* 664.6032, (M+NH<sub>4</sub>)<sup>+</sup>

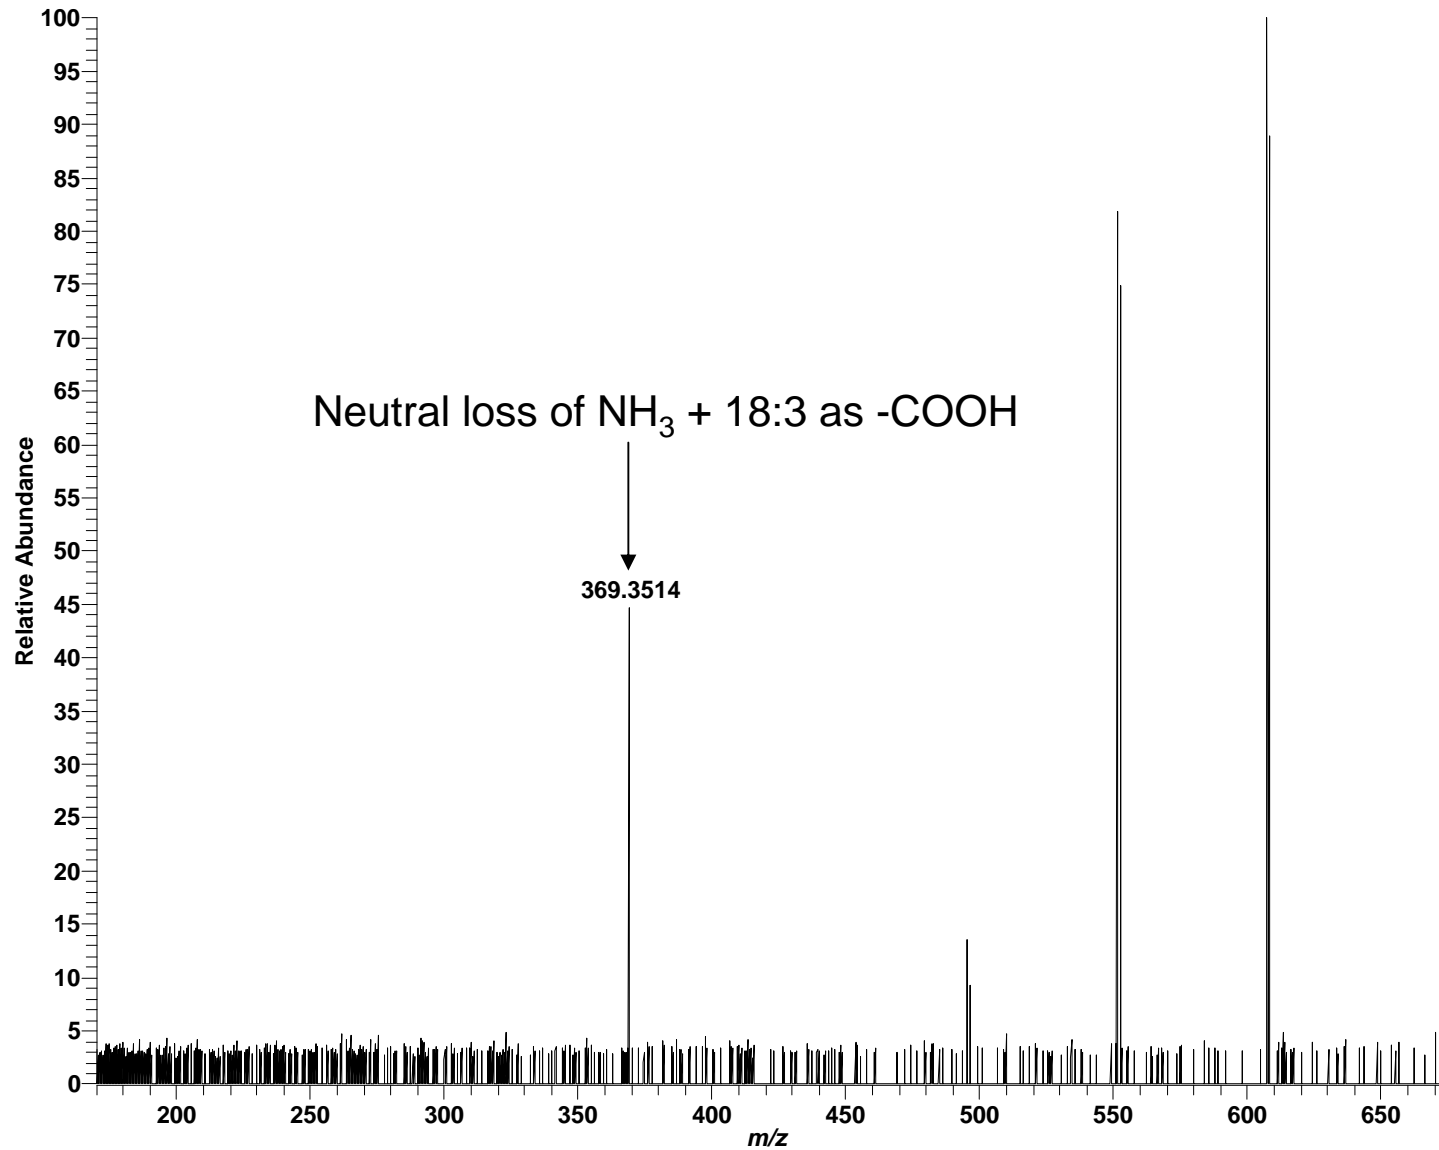

High mass measurement accuracy MS/MS utilizing LTQ-FT

Positive ESI: CE 18:2;  $C_{45}H_{76}O_2$ ; theoretical  $m/z$  666.6189,  $(M+NH_4)^+$

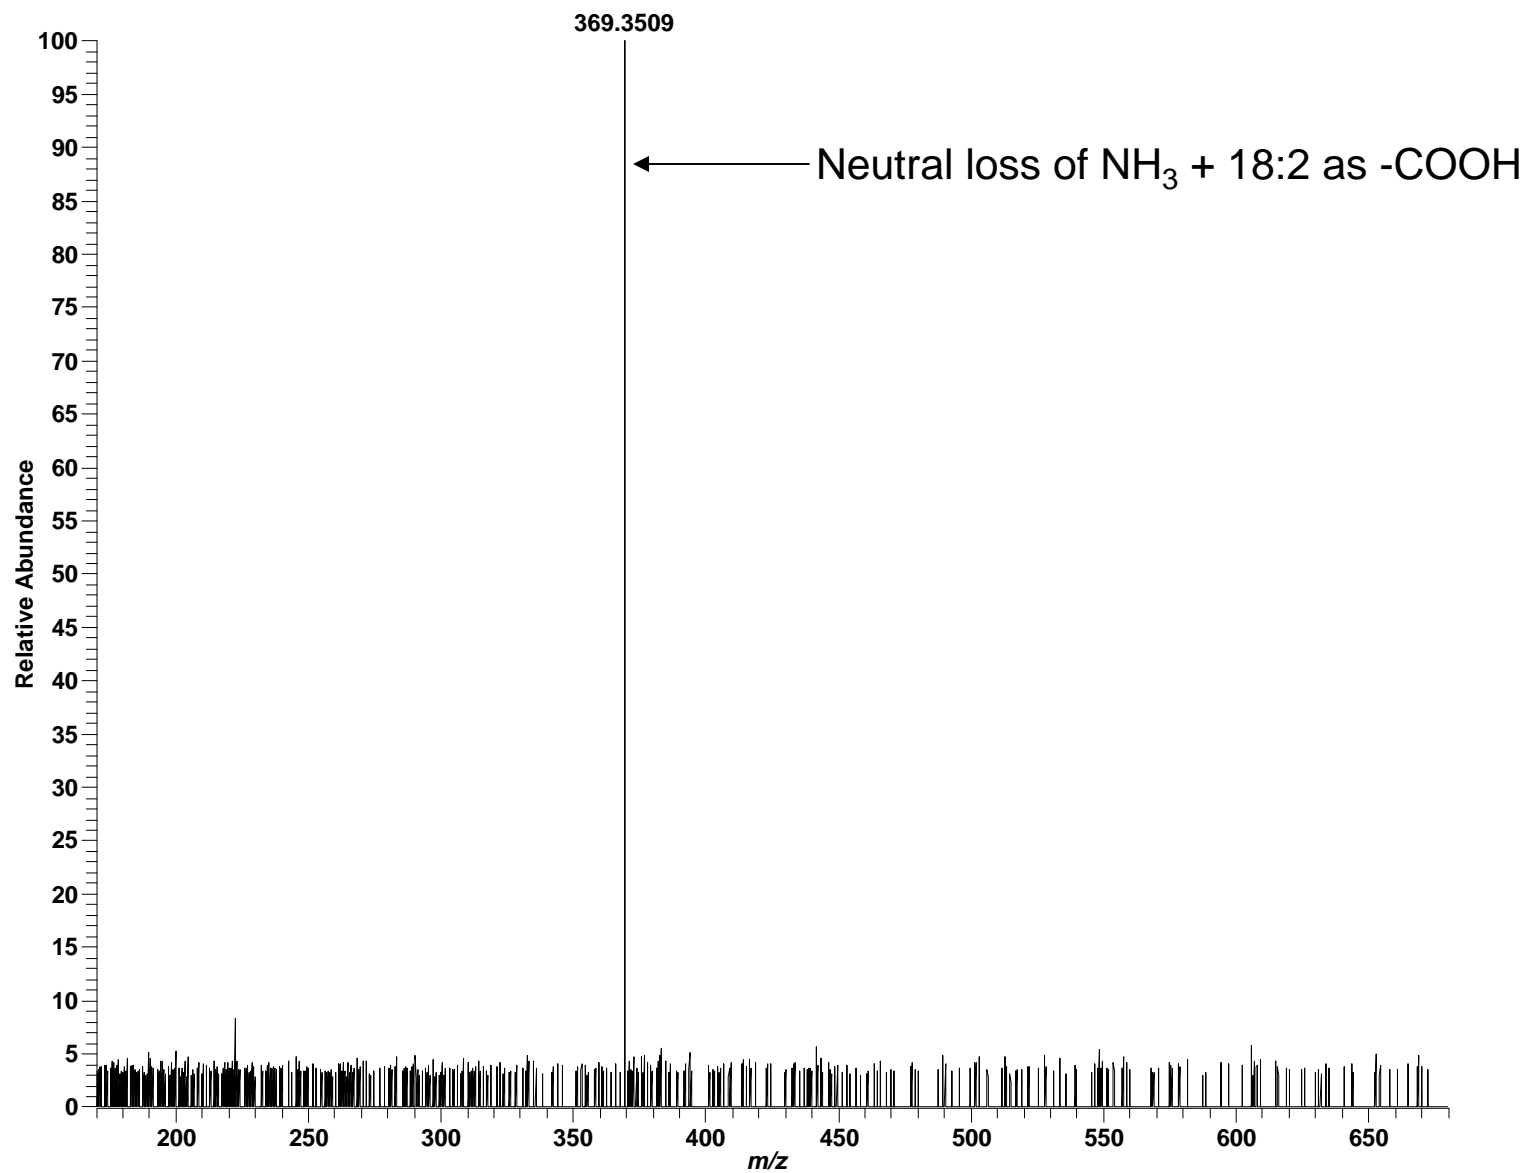

# Triacylglycerols

# High mass measurement accuracy MS/MS utilizing LTQ-FT

Positive ESI: TAG (18:2,18:2,18:3);  $C_{57}H_{96}O_6$ ; theoretical  $m/z$  894.7551,  $(M+NH_4)^+$

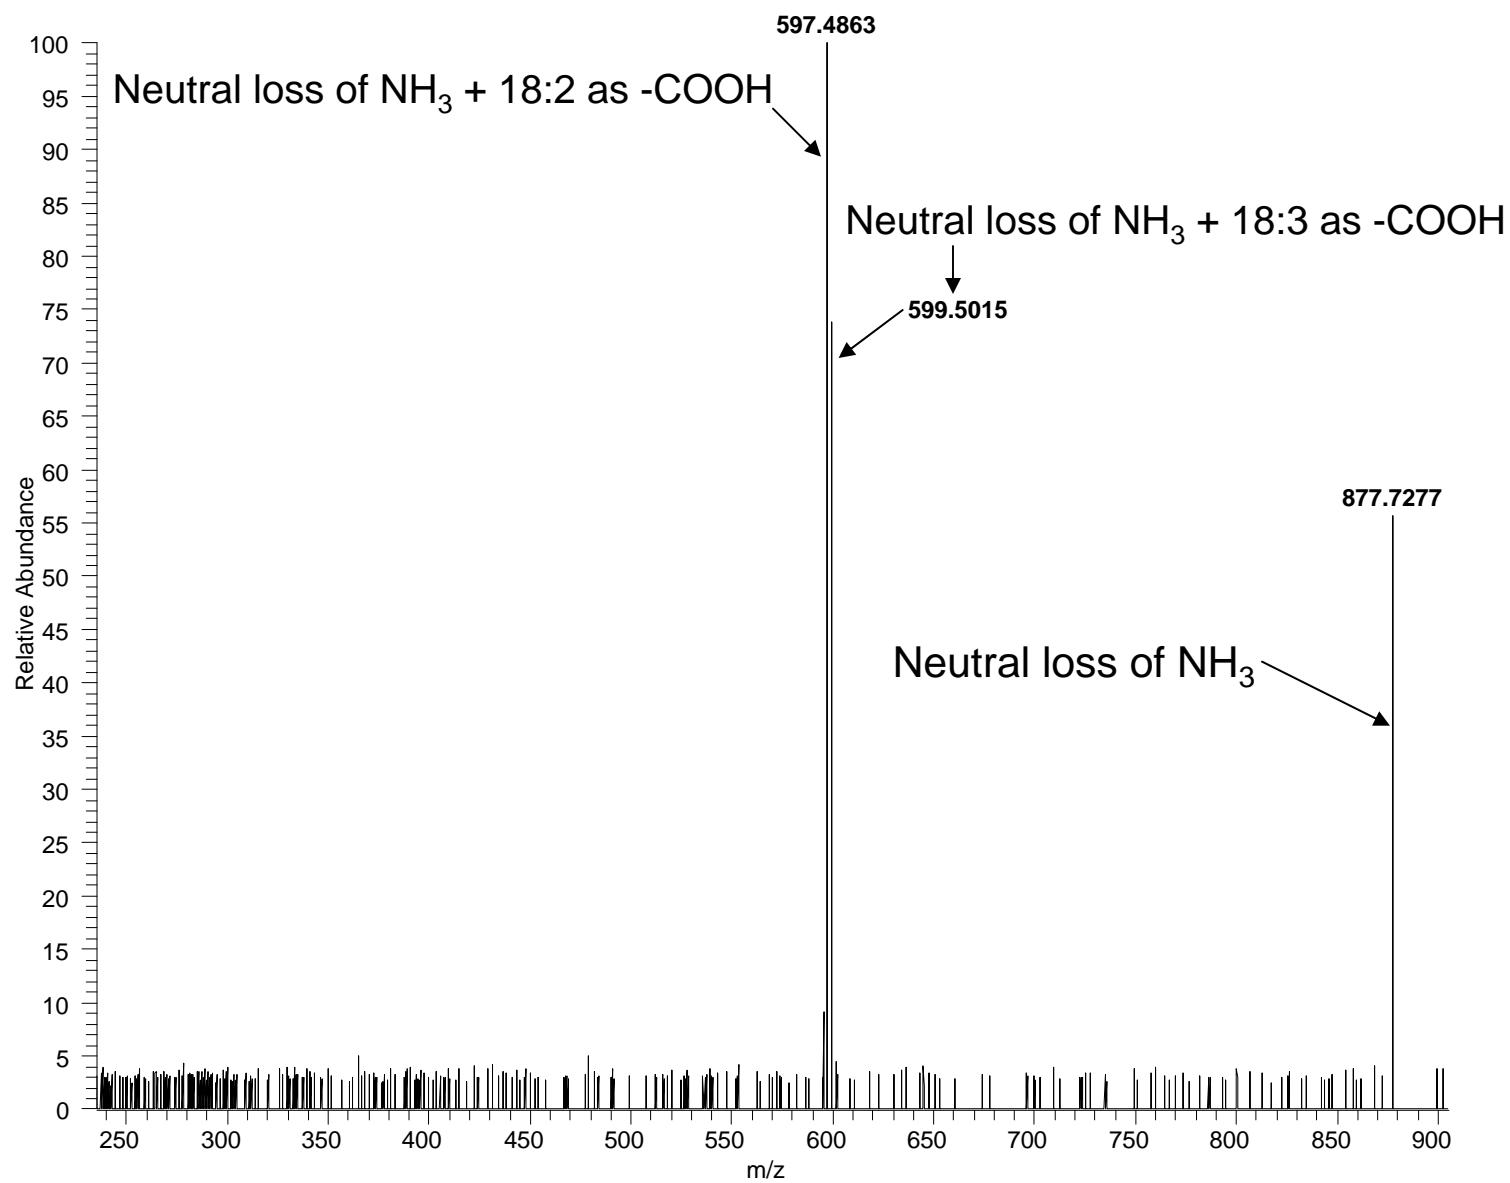

# High mass measurement accuracy MS/MS utilizing LTQ-FT

Positive ESI: TAG (14:0,18:2,18:2);  $C_{53}H_{94}O_6$ ; theoretical  $m/z$  844.7394,  $(M+NH_4)^+$

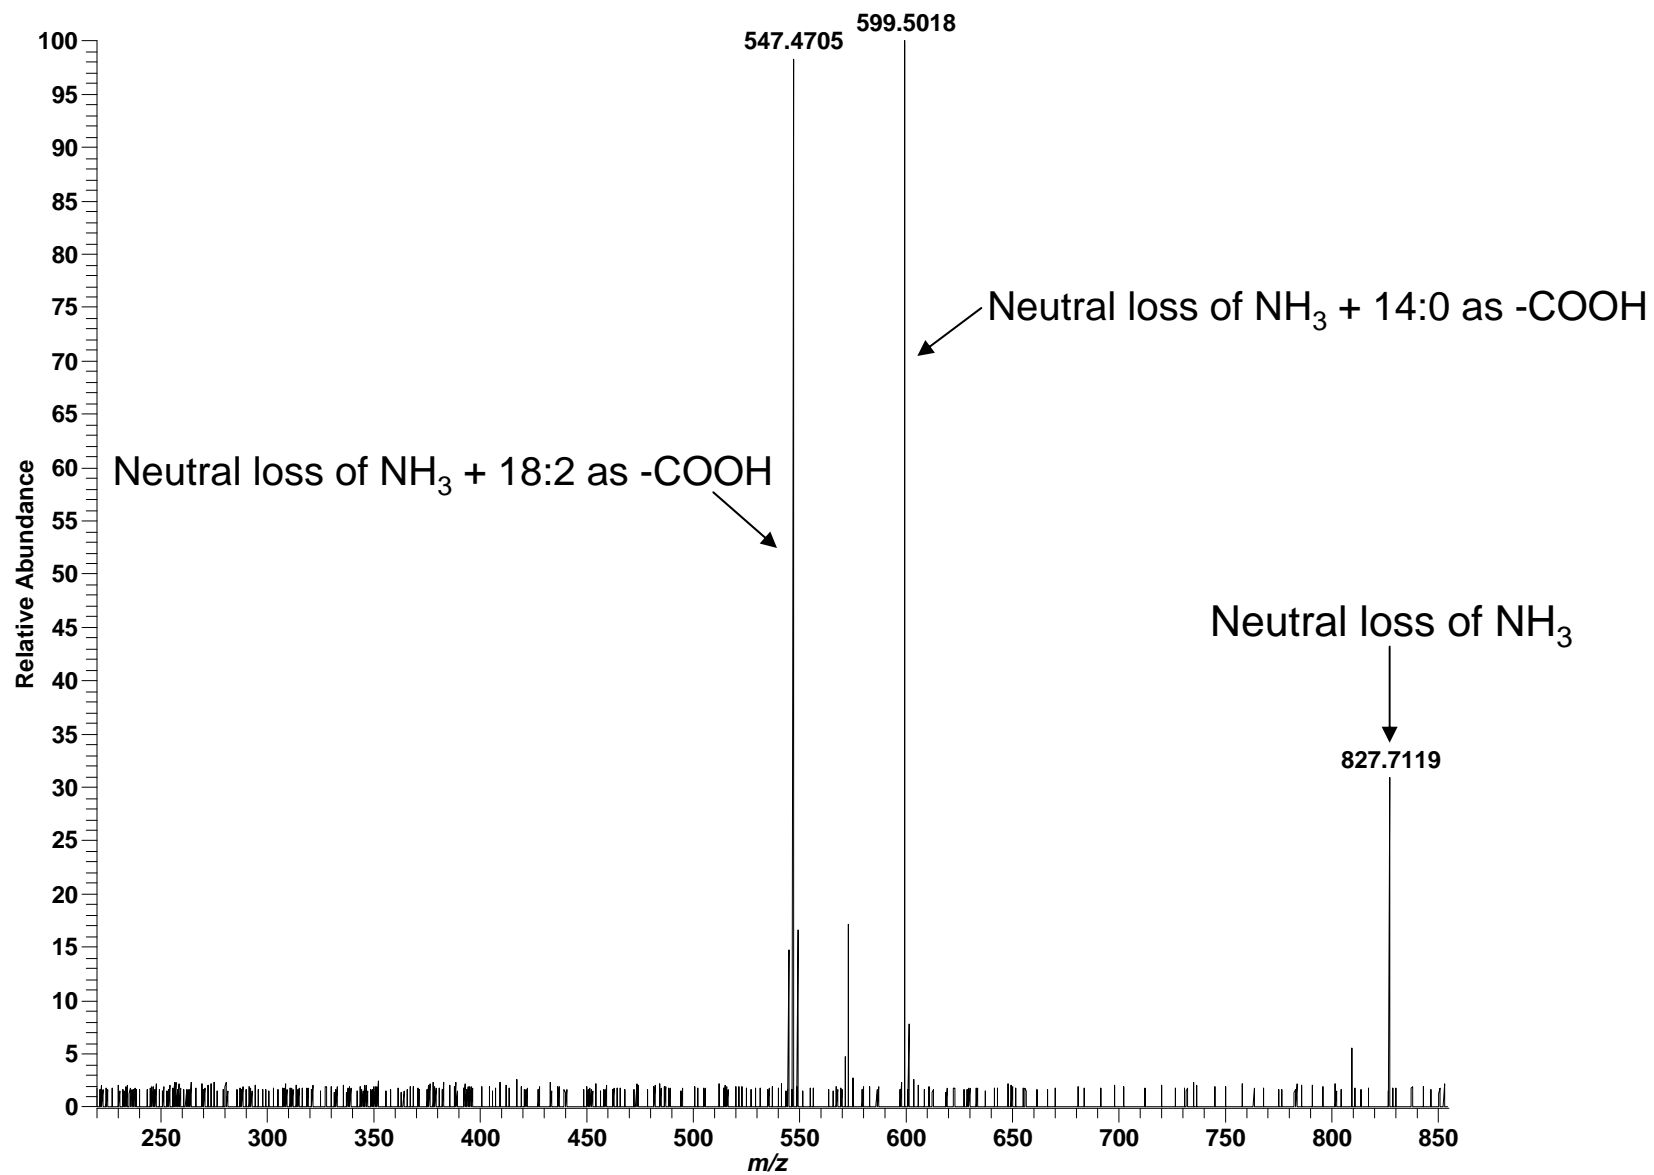

# High mass measurement accuracy MS/MS utilizing LTQ-FT

Positive ESI: TAG (16:1,18:2,18:2);  $C_{55}H_{96}O_6$ ; theoretical  $m/z$  870.7550,  $(M+NH_4)^+$

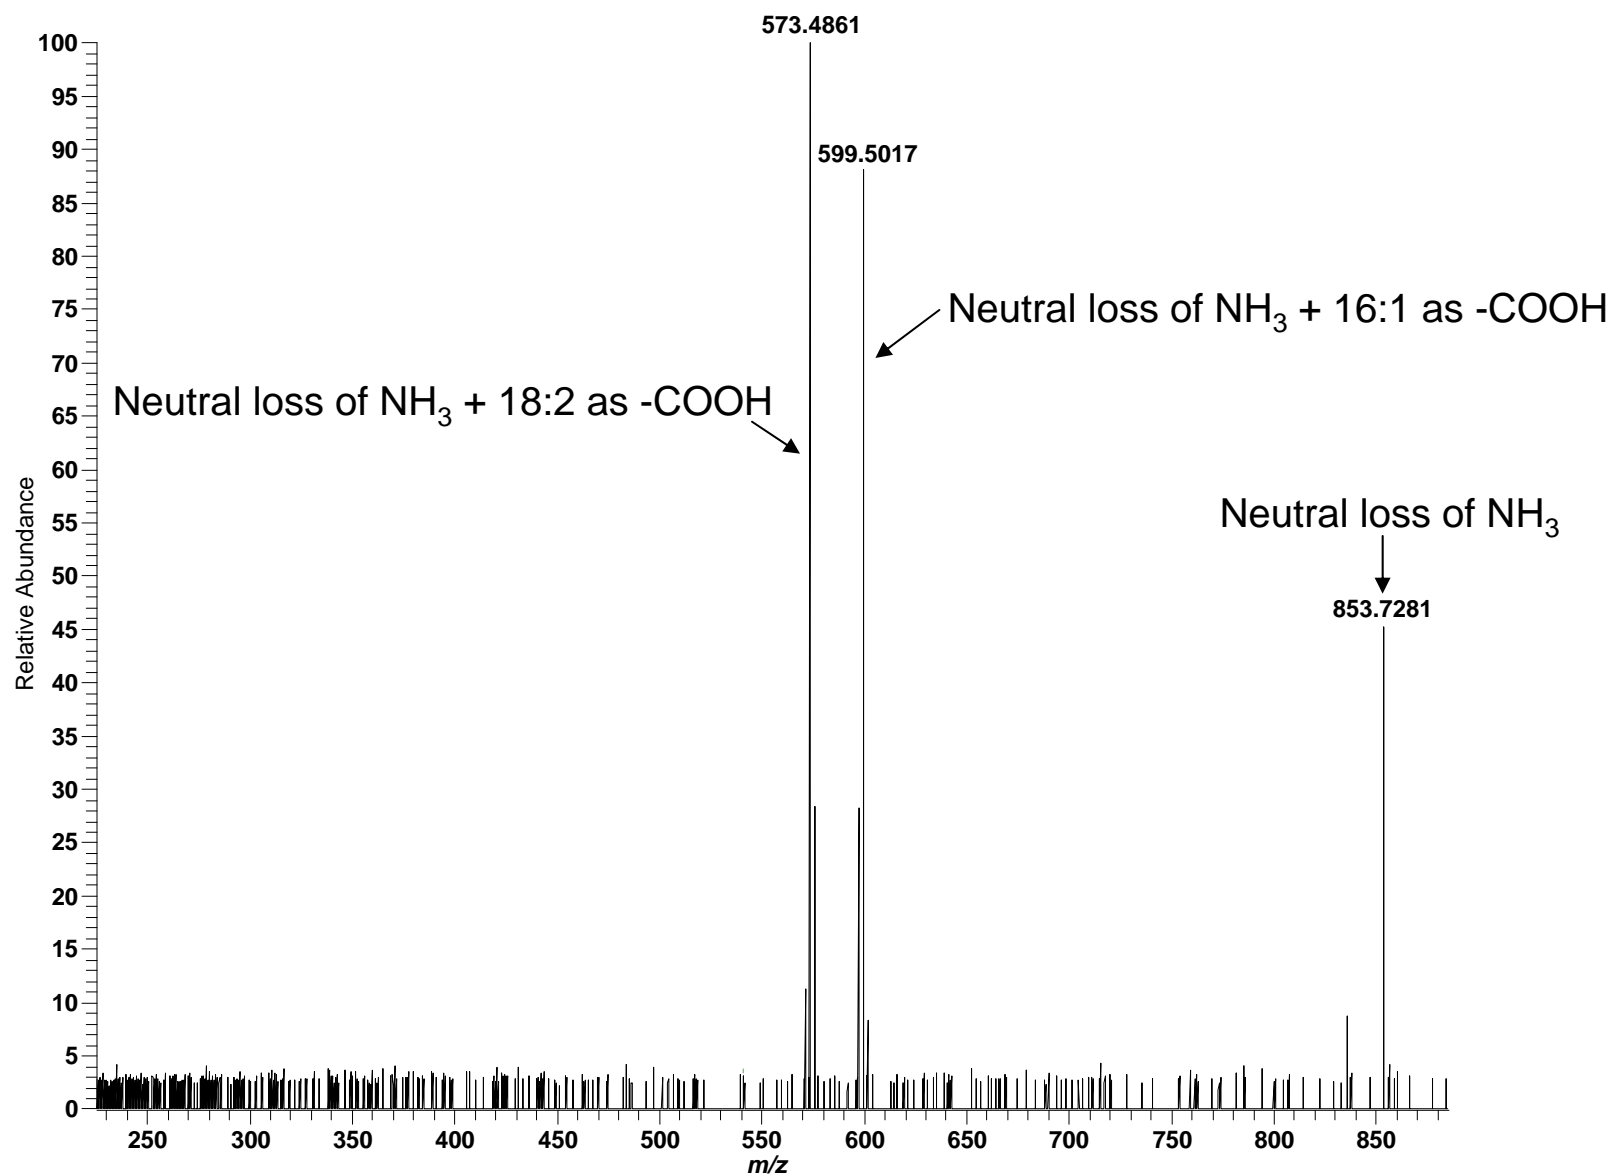



# High mass measurement accuracy MS/MS utilizing LTQ-FT

Positive ESI: TAG (16:0,18:2,18:3);  $C_{55}H_{96}O_6$ ; theoretical  $m/z$  870.7550,  $(M+NH_4)^+$

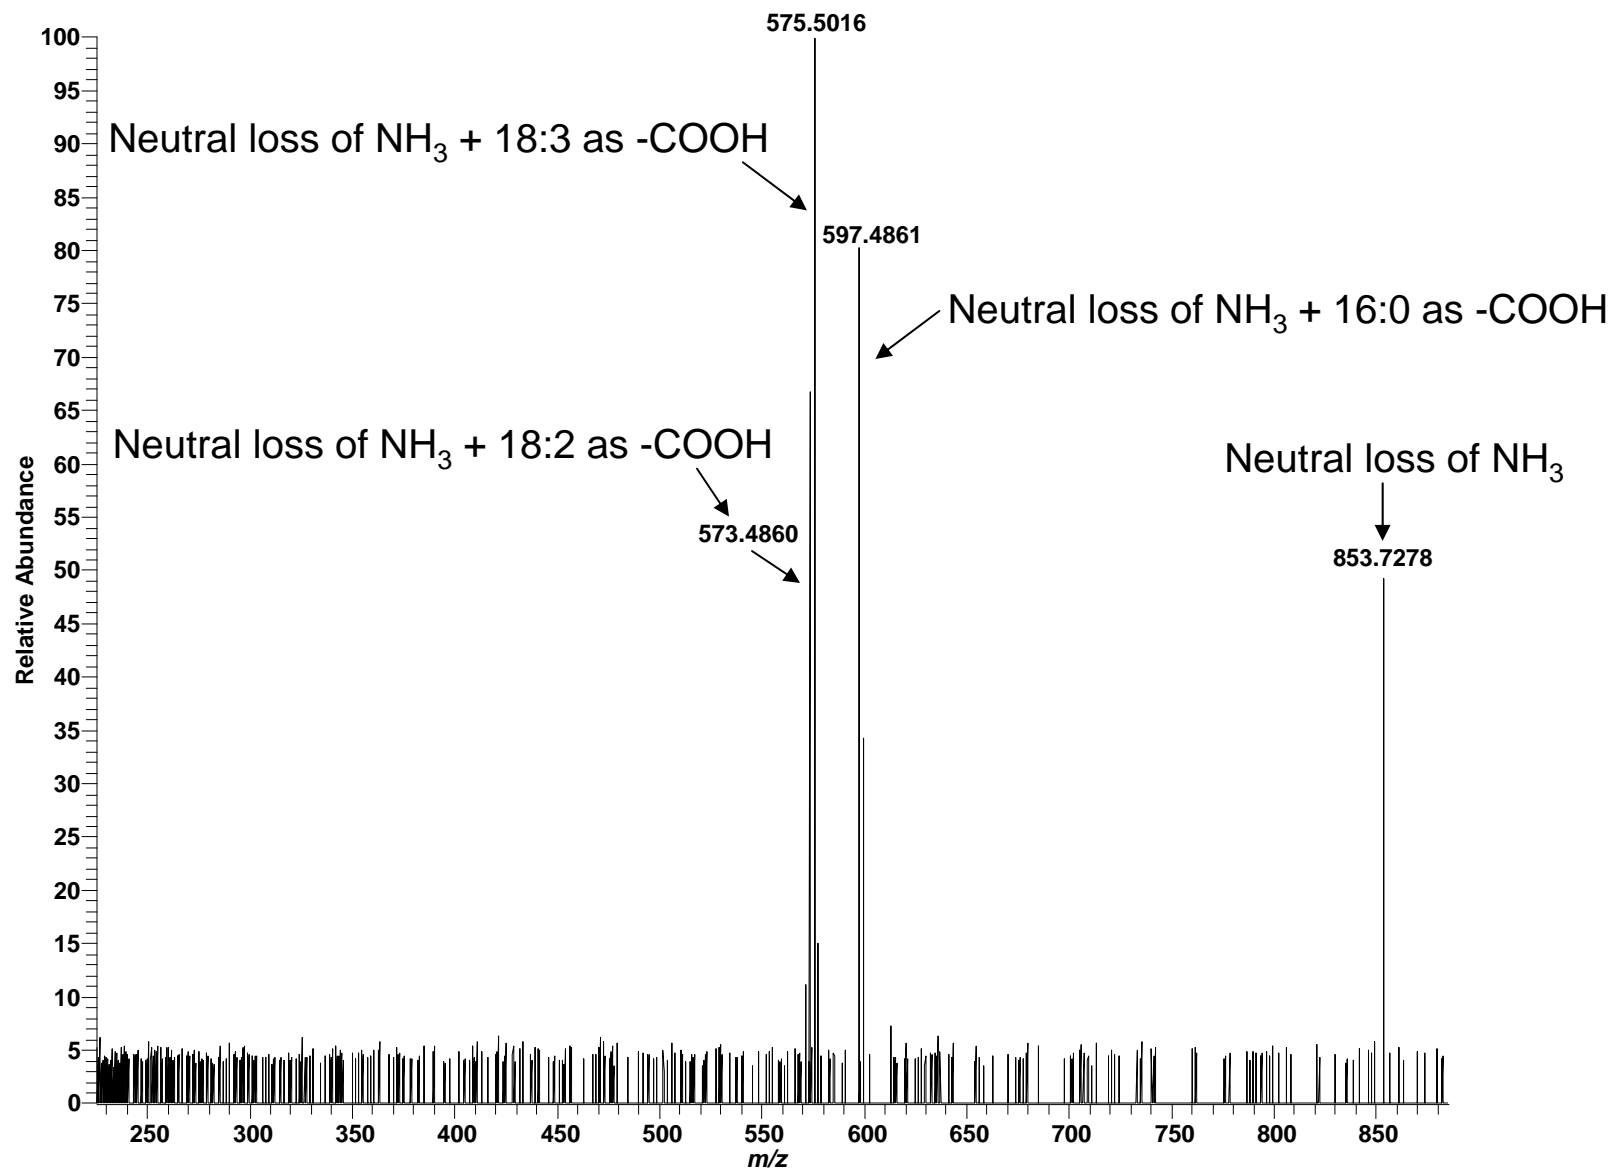

# High mass measurement accuracy MS/MS utilizing LTQ-FT

Positive ESI: TAG (16:0,18:2,22:6);  $C_{59}H_{98}O_6$ ; theoretical  $m/z$  920.7707,  $(M+NH_4)^+$

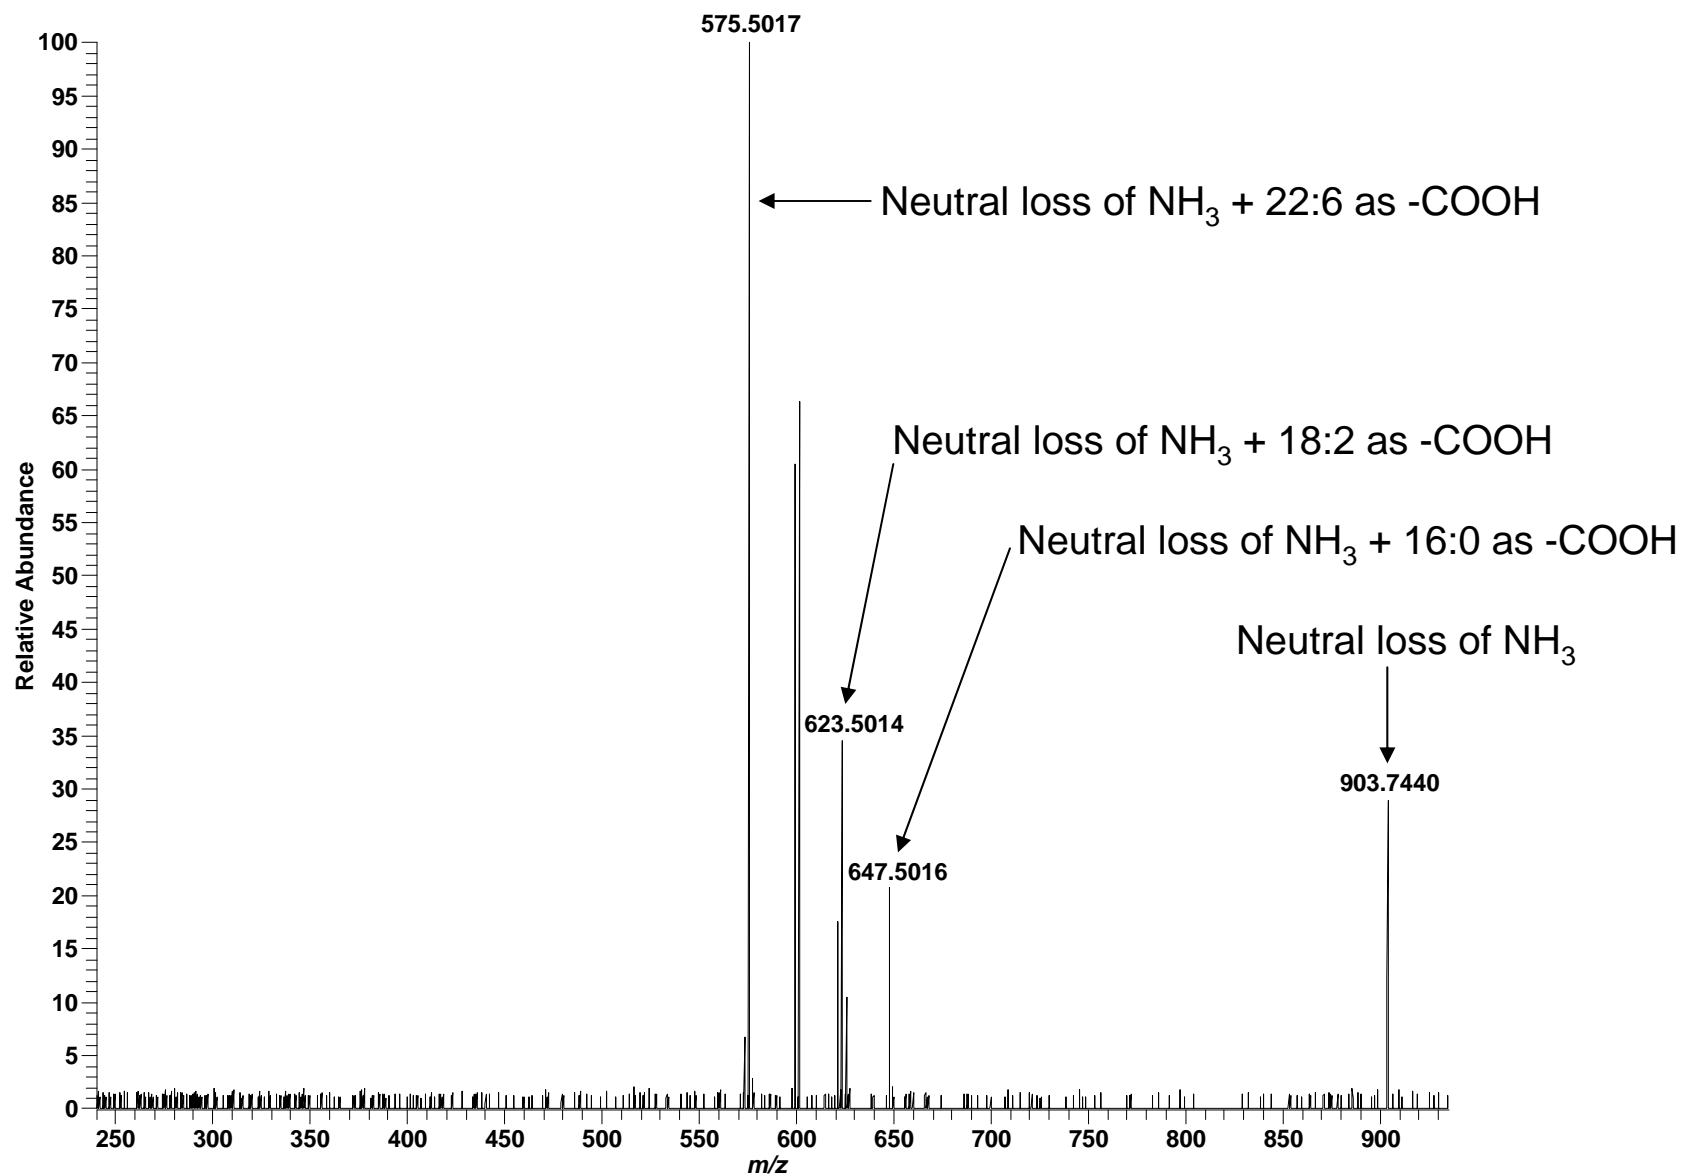

# High mass measurement accuracy MS/MS utilizing LTQ-FT

Positive ESI: TAG (18:1,18:2,20:4);  $C_{59}H_{100}O_6$ ; theoretical  $m/z$  922.7864,  $(M+NH_4)^+$

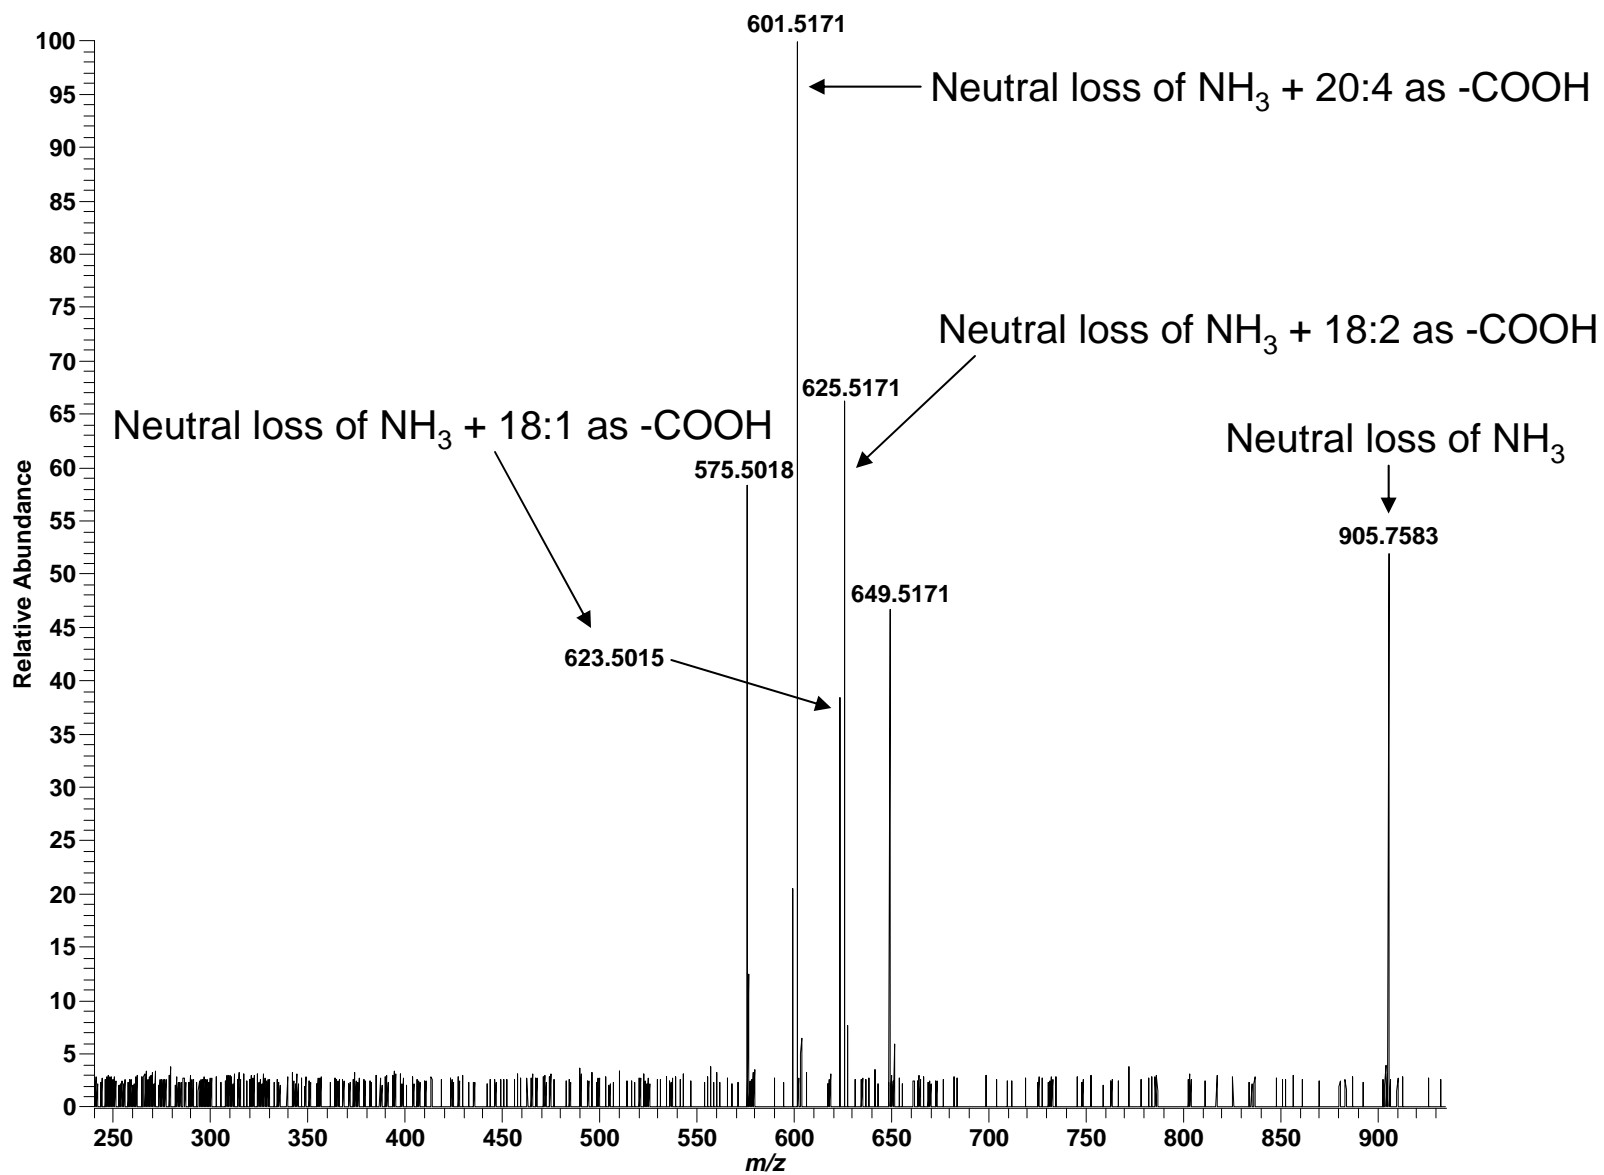

# High mass measurement accuracy MS/MS utilizing LTQ-FT

Positive ESI: TAG (16:0,20:3,20:4);  $C_{59}H_{100}O_6$ ; theoretical  $m/z$  922.7864,  $(M+NH_4)^+$

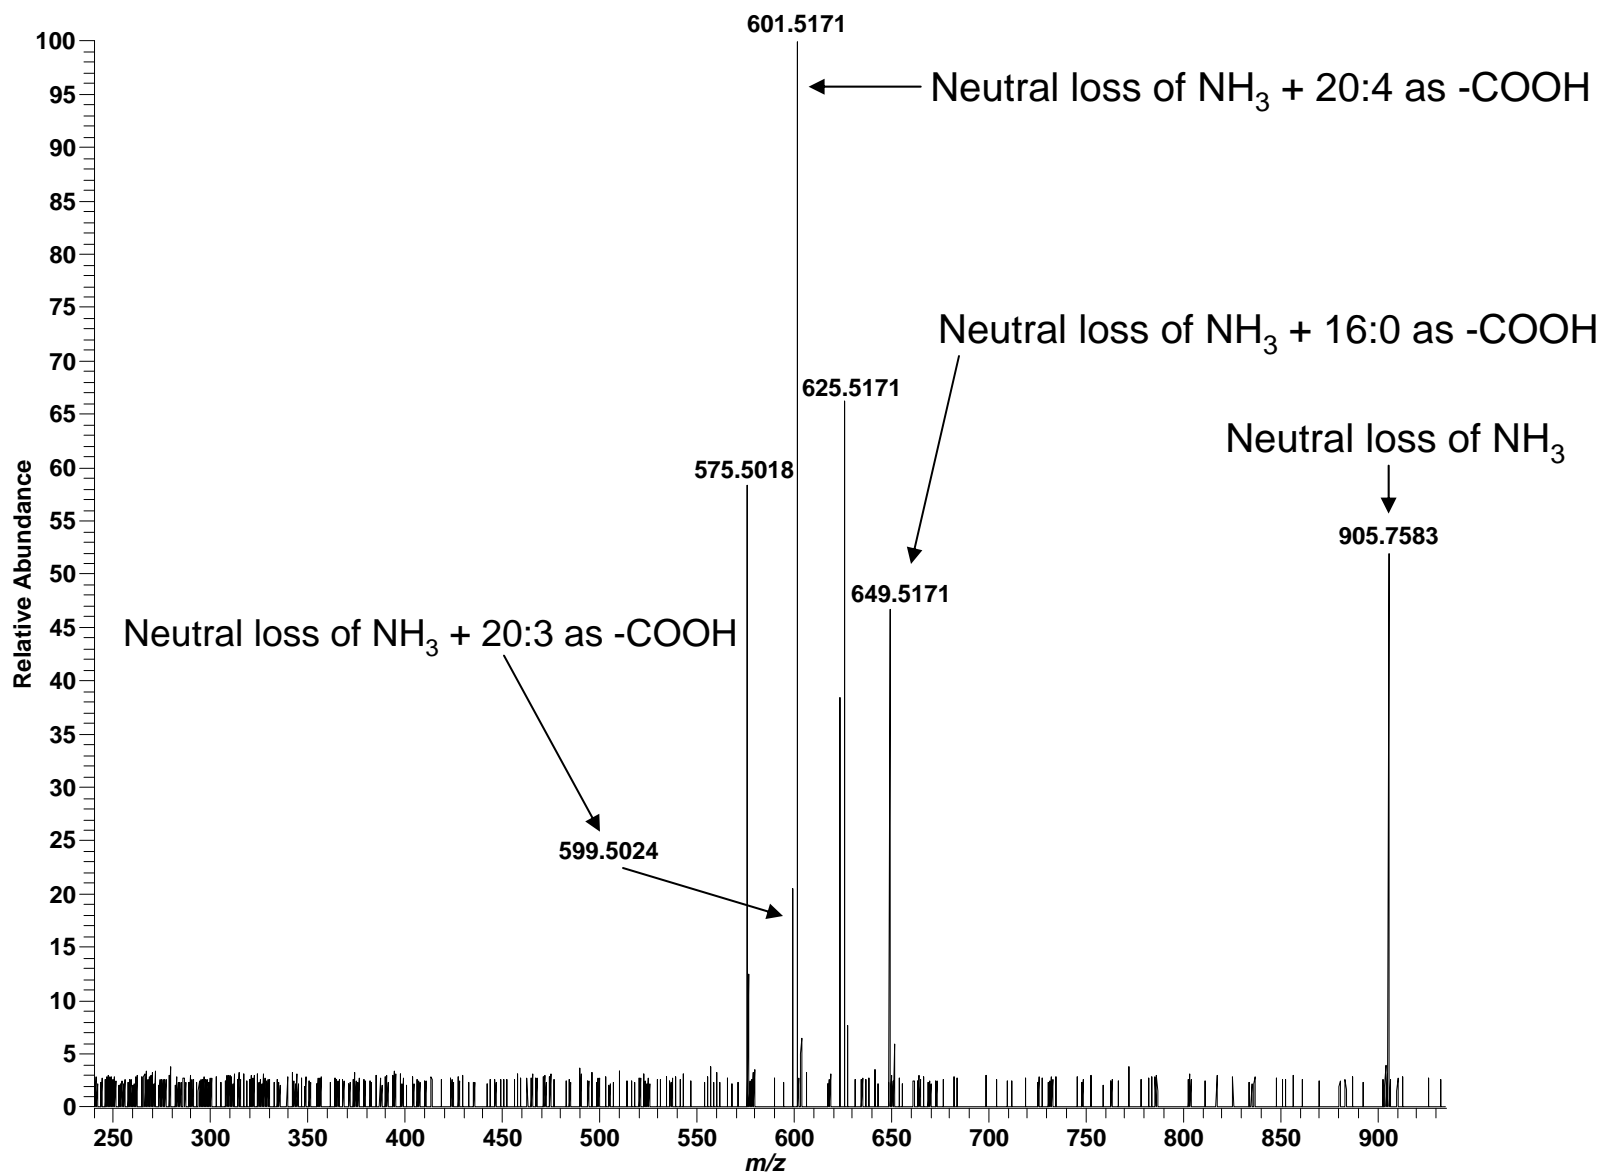

# High mass measurement accuracy MS/MS utilizing LTQ-FT

Positive ESI: TAG (16:0,18:2,20:4);  $C_{57}H_{98}O_6$ ; theoretical  $m/z$  896.7707,  $(M+NH_4)^+$

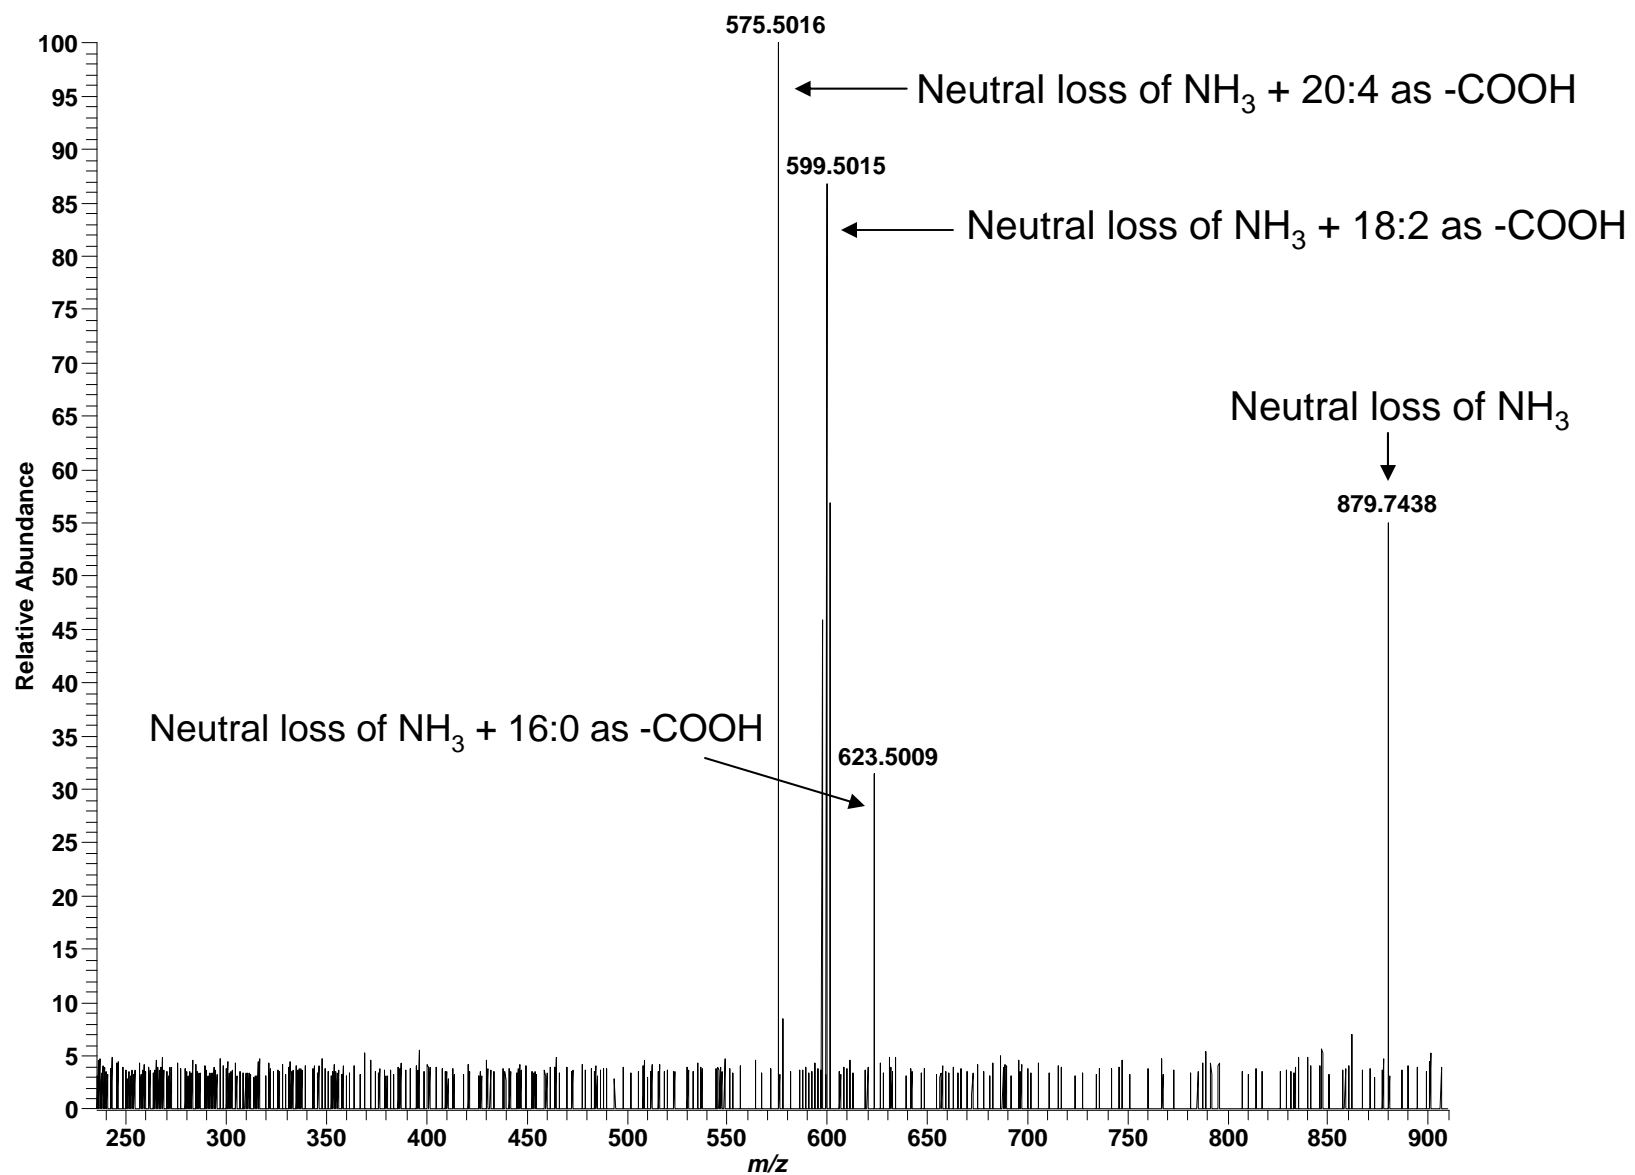

# High mass measurement accuracy MS/MS utilizing LTQ-FT

Positive ESI: TAG (18:1,18:2,18:3);  $C_{57}H_{98}O_6$ ; theoretical  $m/z$  896.7707,  $(M+NH_4)^+$

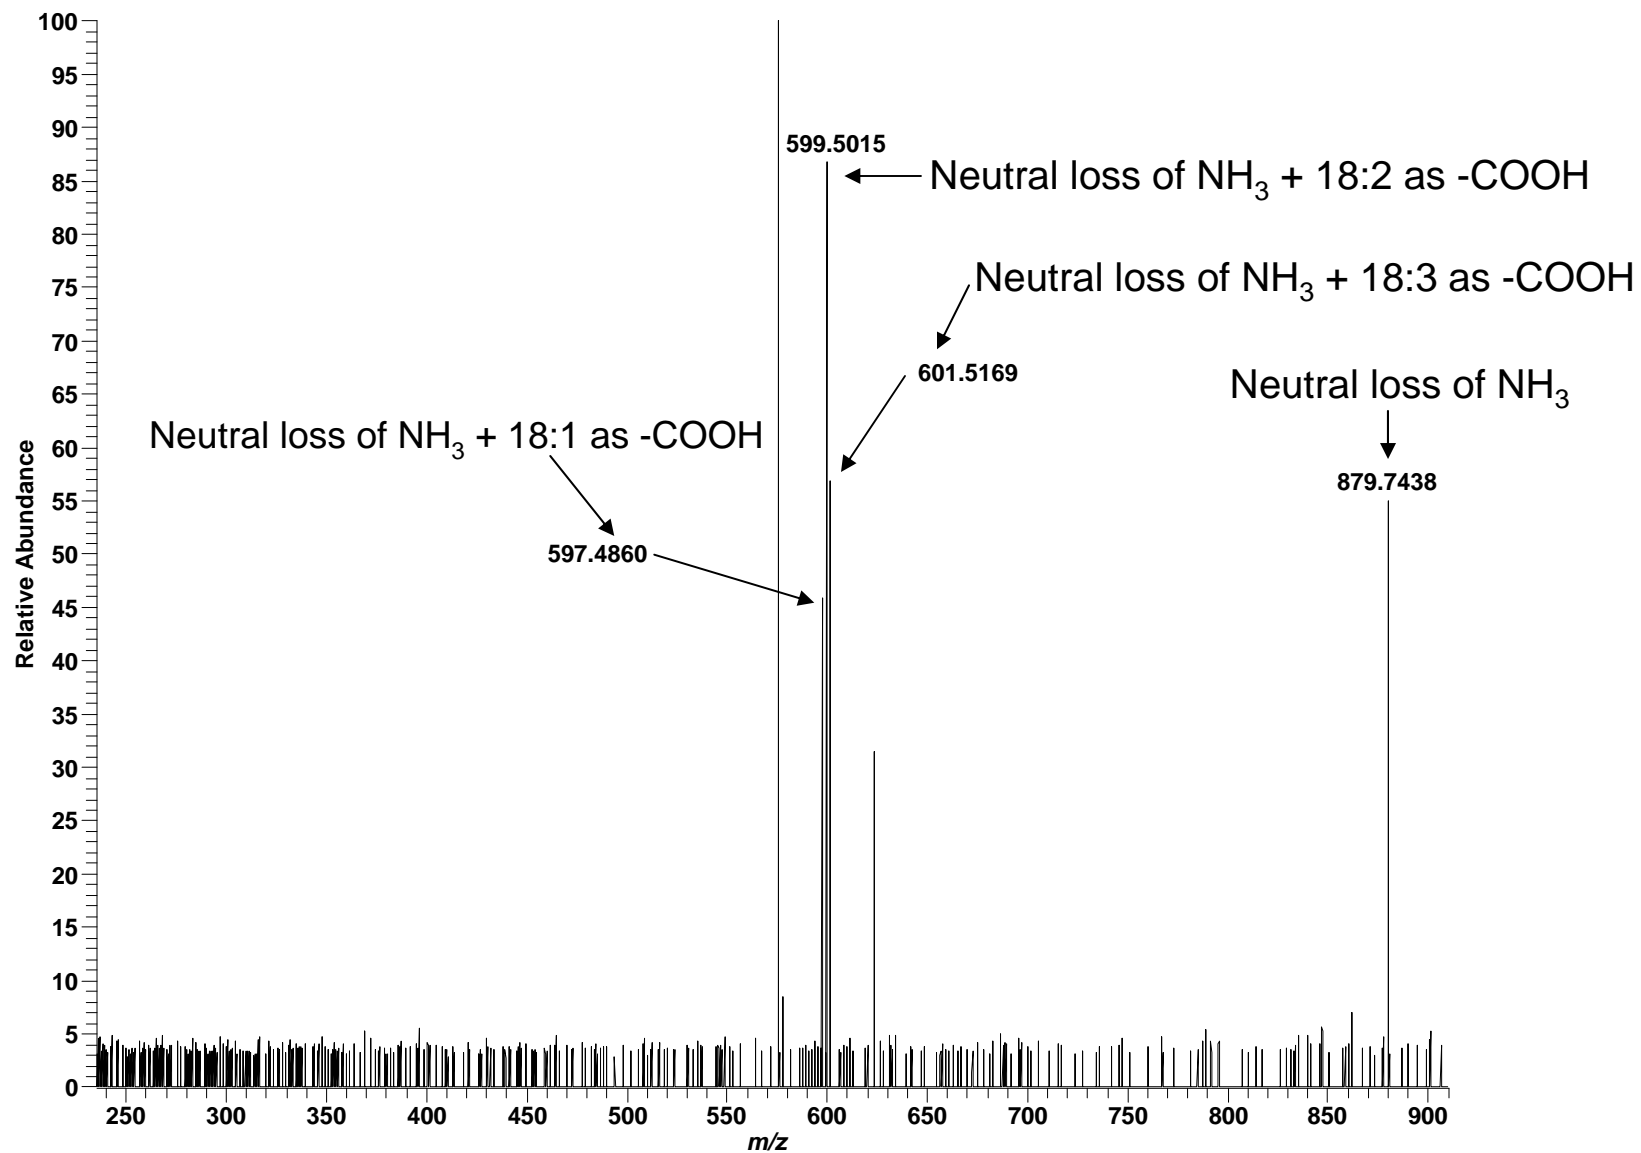

# High mass measurement accuracy MS/MS utilizing LTQ-FT

Positive ESI: TAG (14:0,18:1,18:2);  $C_{53}H_{96}O_6$ ; theoretical  $m/z$  846.7551,  $(M+NH_4)^+$

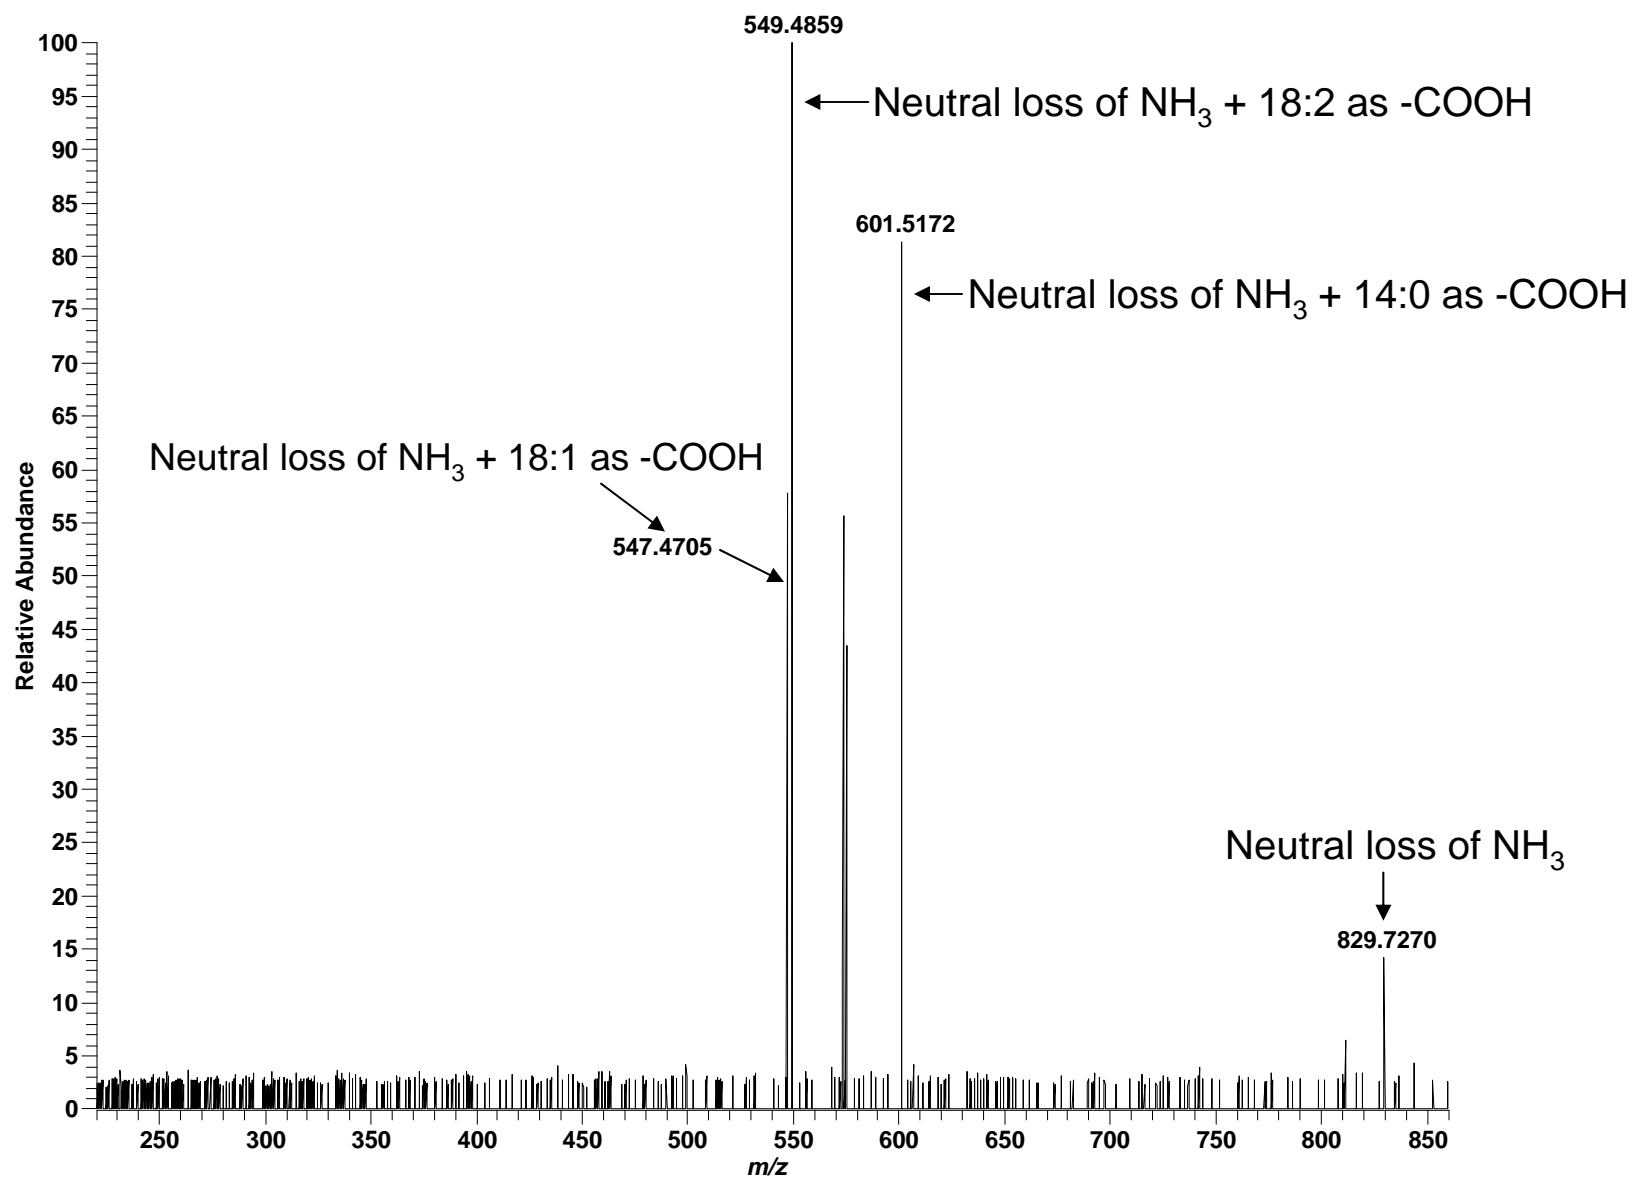

# High mass measurement accuracy MS/MS utilizing LTQ-FT

Positive ESI: TAG (16:0,16:1,18:2);  $C_{53}H_{96}O_6$ ; theoretical  $m/z$  846.7551,  $(M+NH_4)^+$

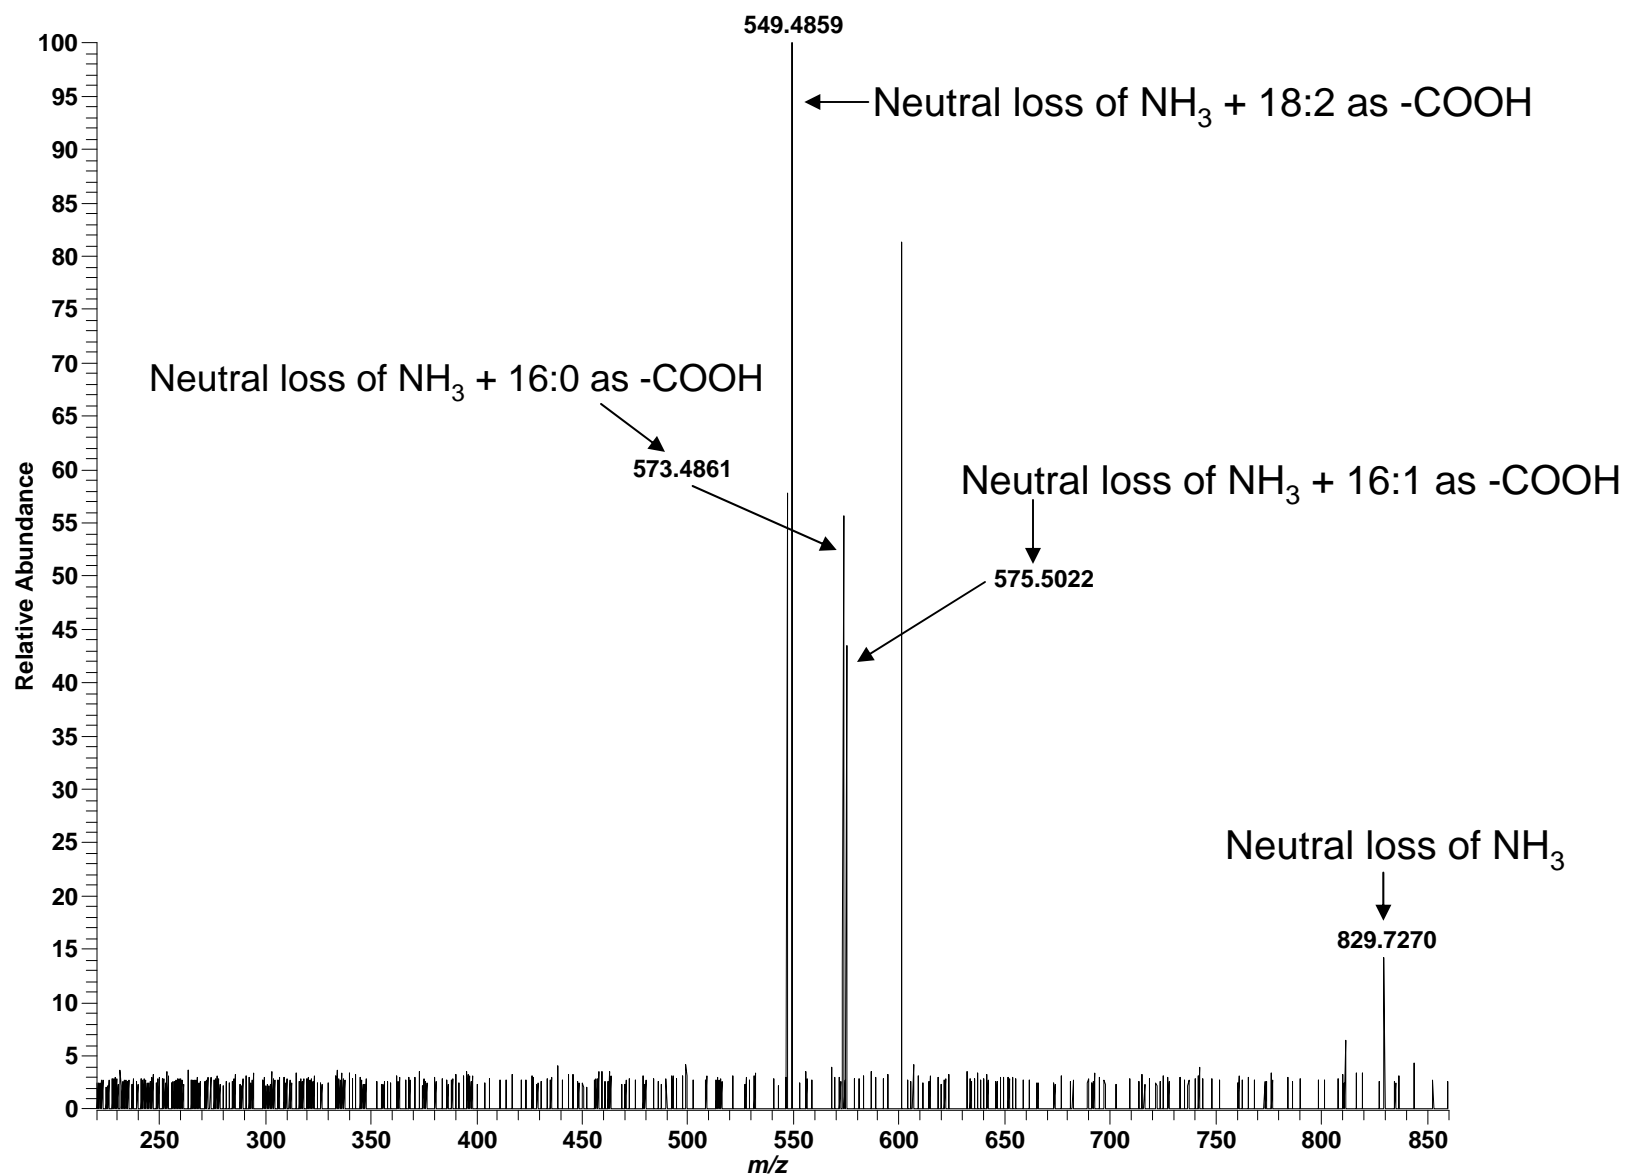



# High mass measurement accuracy MS/MS utilizing LTQ-FT

Positive ESI: TAG (16:0,18:2,18:2);  $C_{55}H_{98}O_6$ ; theoretical  $m/z$  872.7707,  $(M+NH_4)^+$

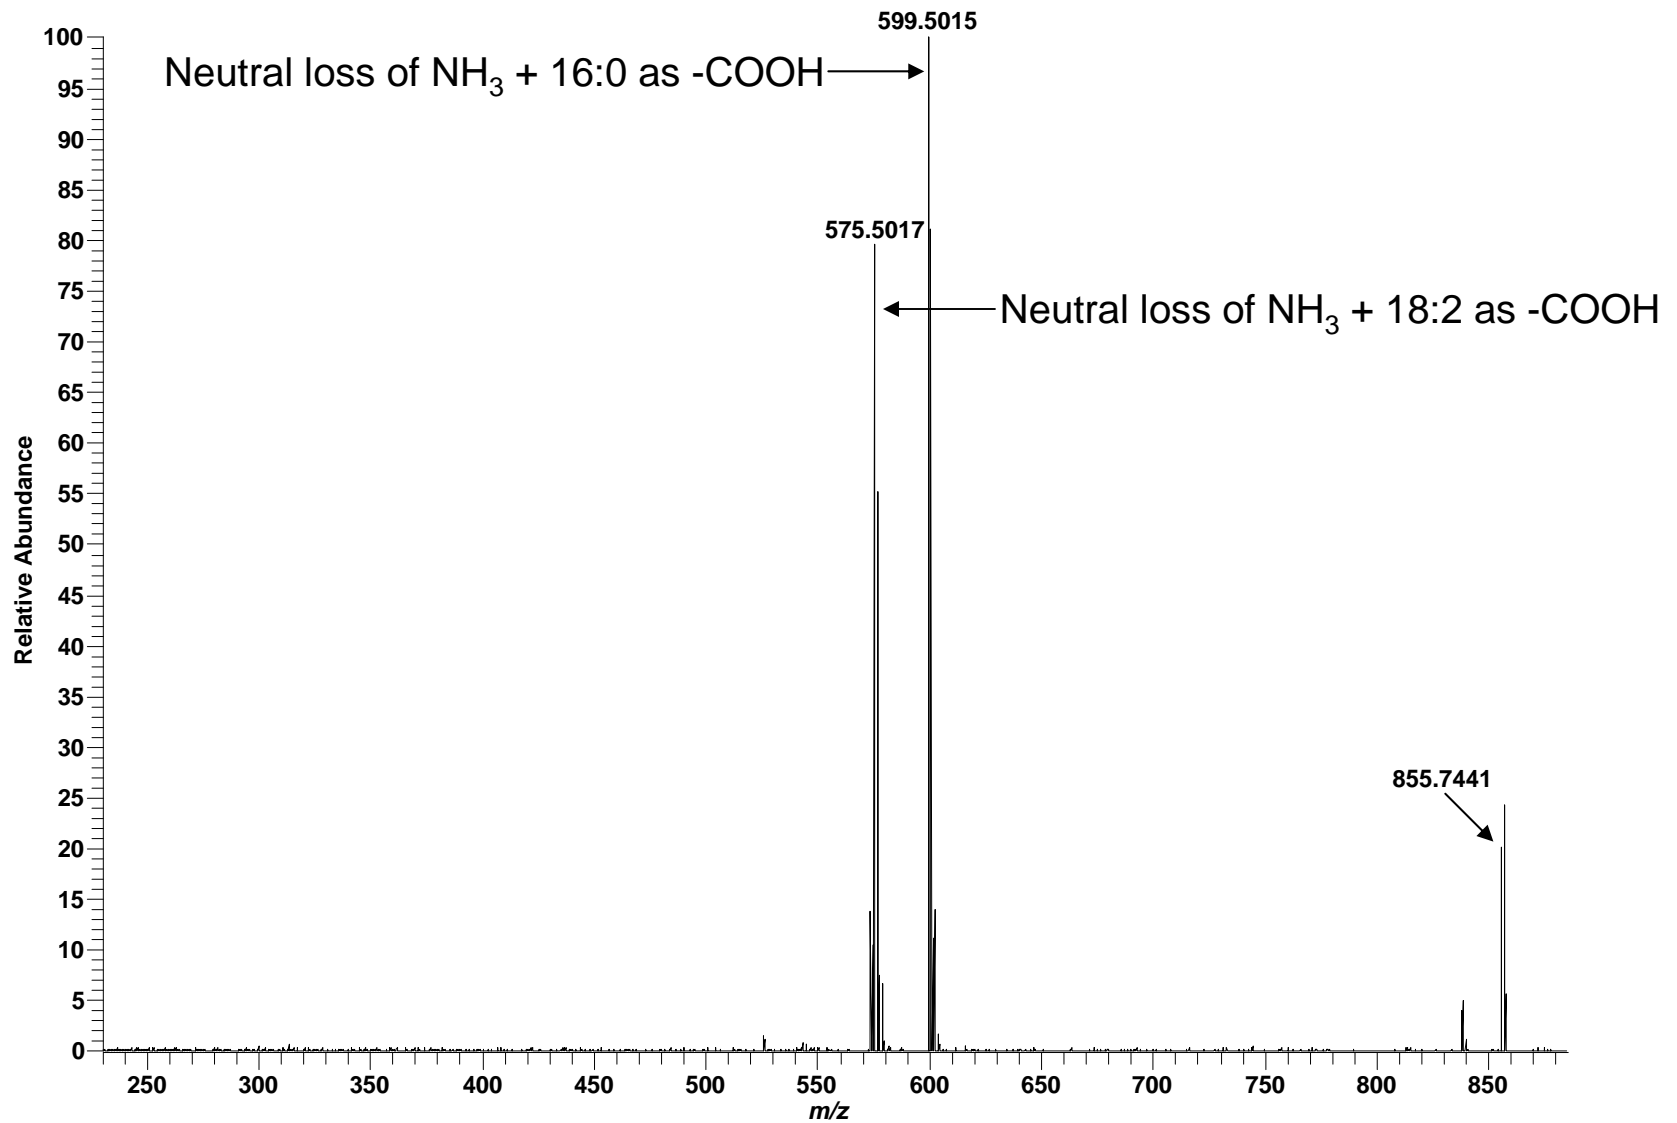

# High mass measurement accuracy MS/MS utilizing LTQ-FT

Positive ESI: TAG (16:0,18:2,18:3);  $C_{55}H_{98}O_6$ ; theoretical  $m/z$  872.7707,  $(M+NH_4)^+$

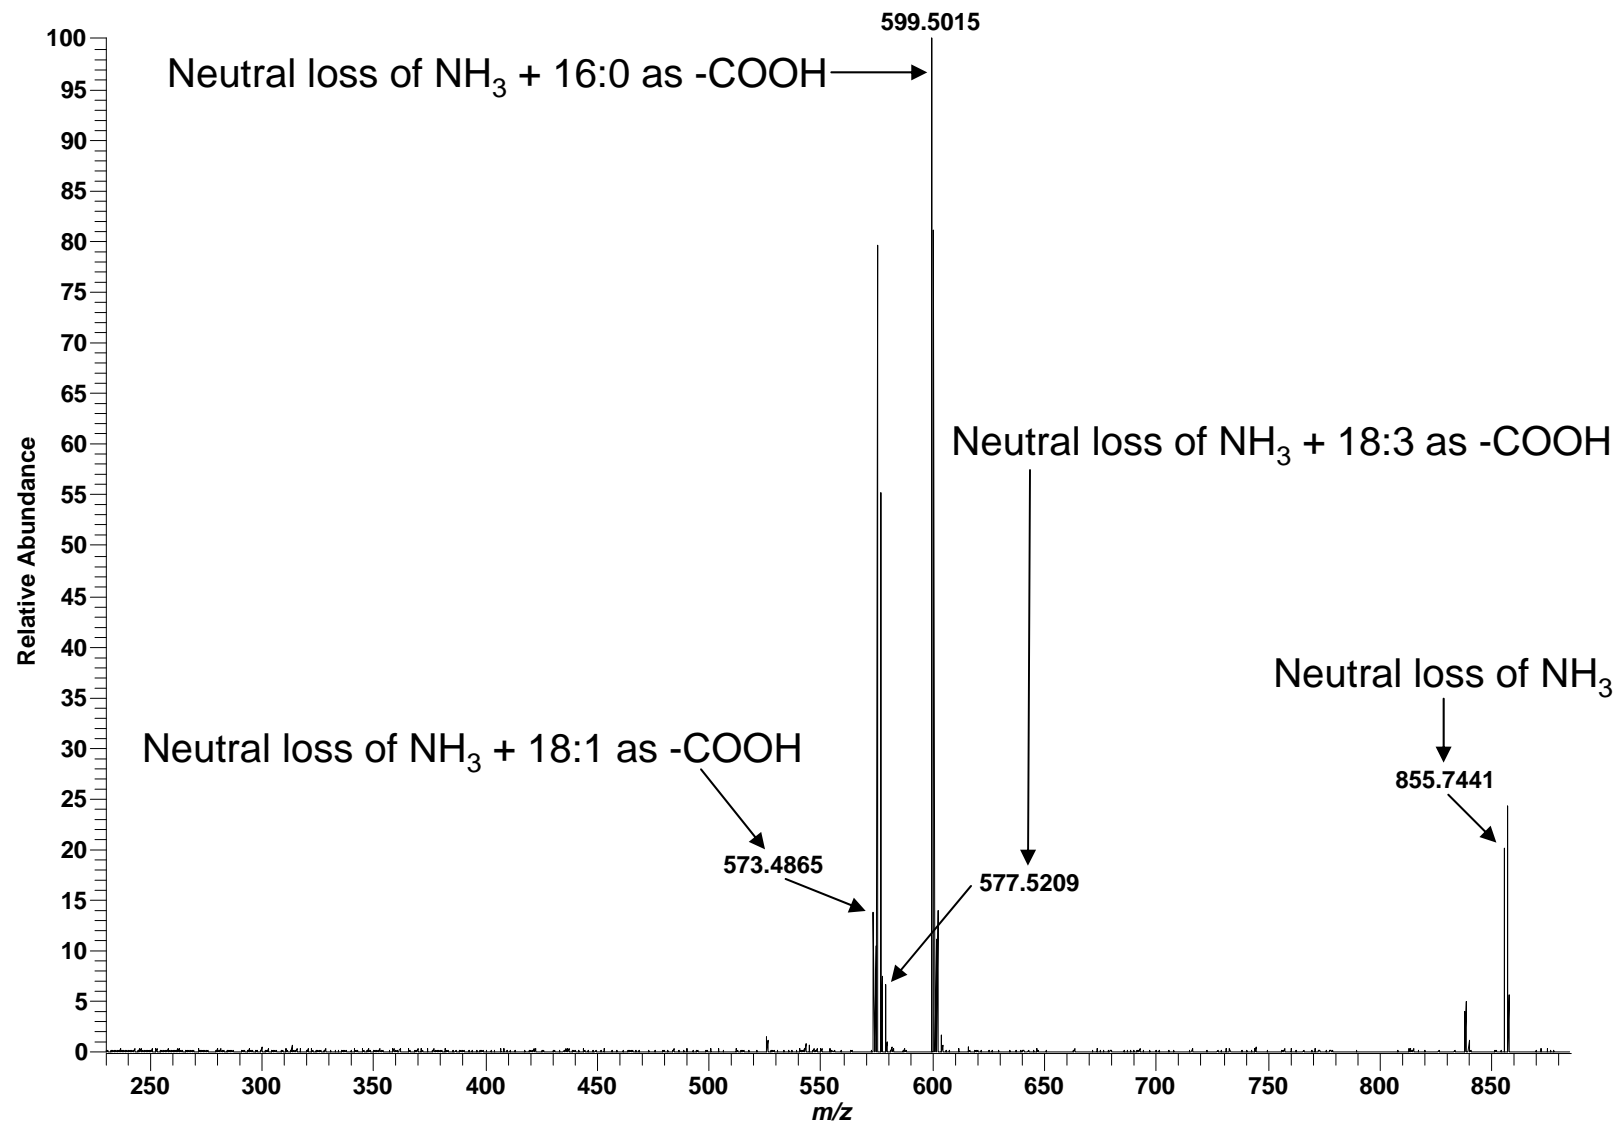

# High mass measurement accuracy MS/MS utilizing LTQ-FT

Positive ESI: TAG (18:1,18:2,18:2);  $C_{57}H_{100}O_6$ ; theoretical  $m/z$  898.7864,  $(M+NH_4)^+$

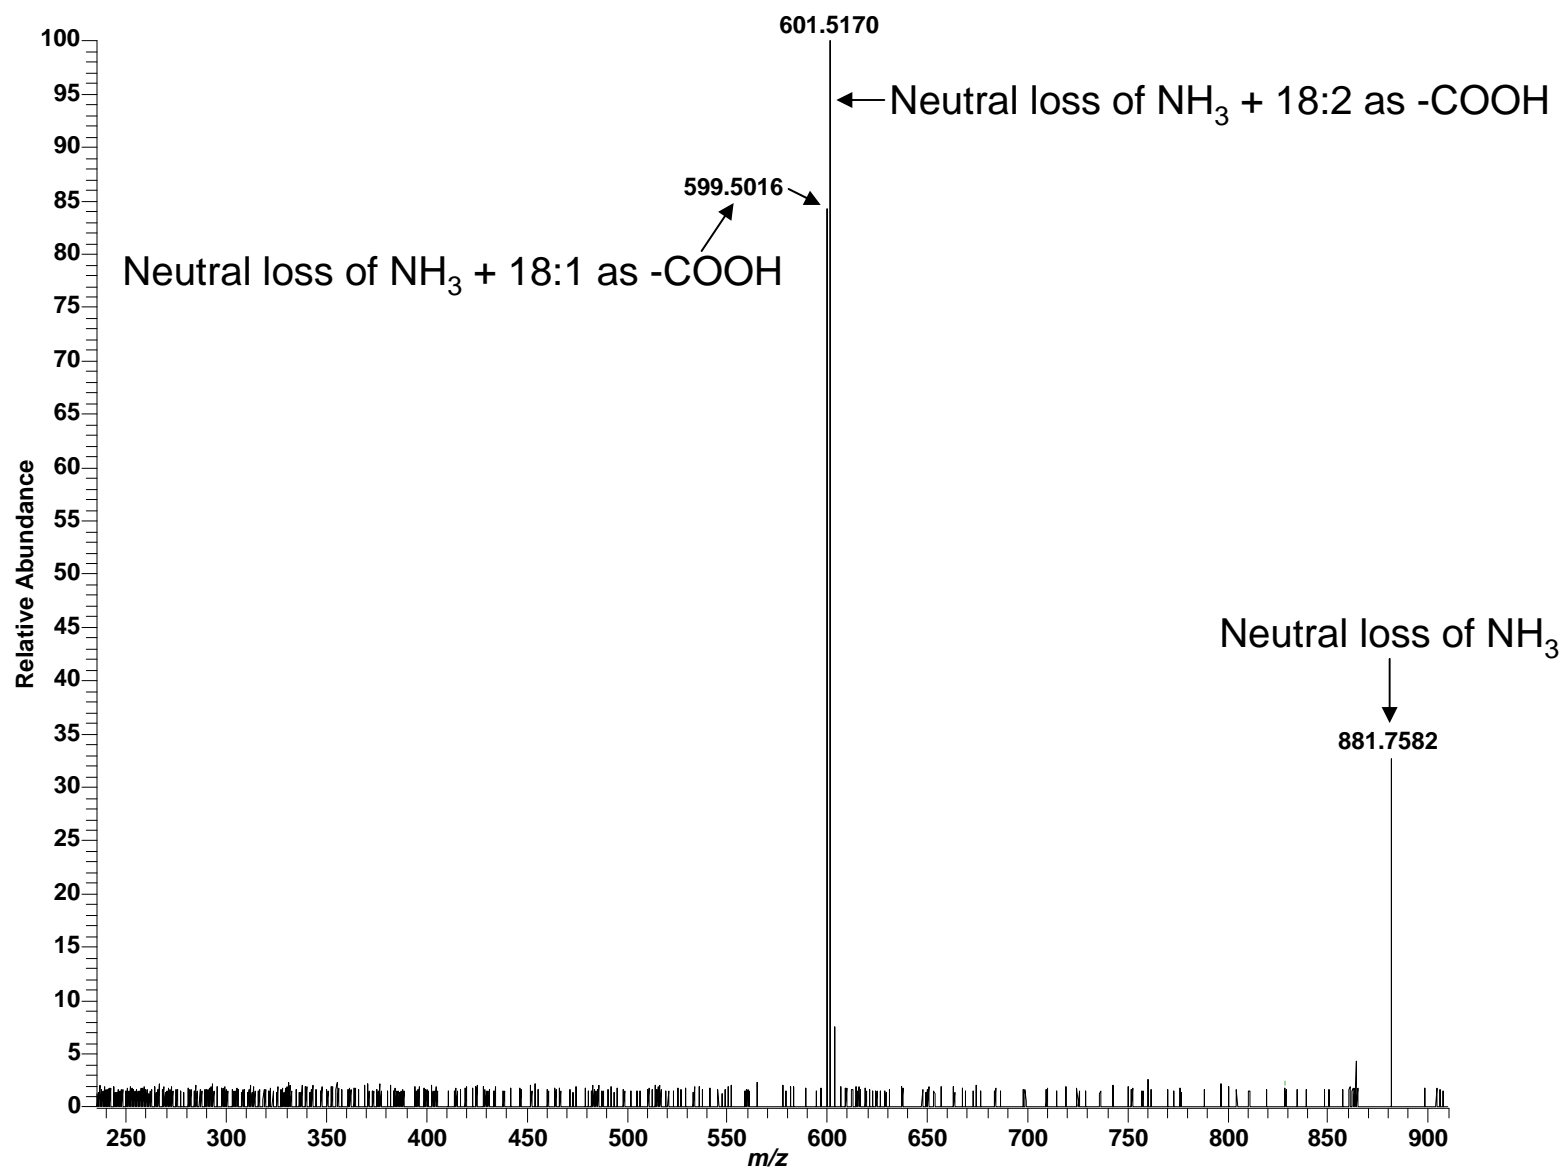

# High mass measurement accuracy MS/MS utilizing LTQ-FT

Positive ESI: TAG (14:0,16:0,18:2);  $C_{51}H_{94}O_6$ ; theoretical  $m/z$  820.7394,  $(M+NH_4)^+$

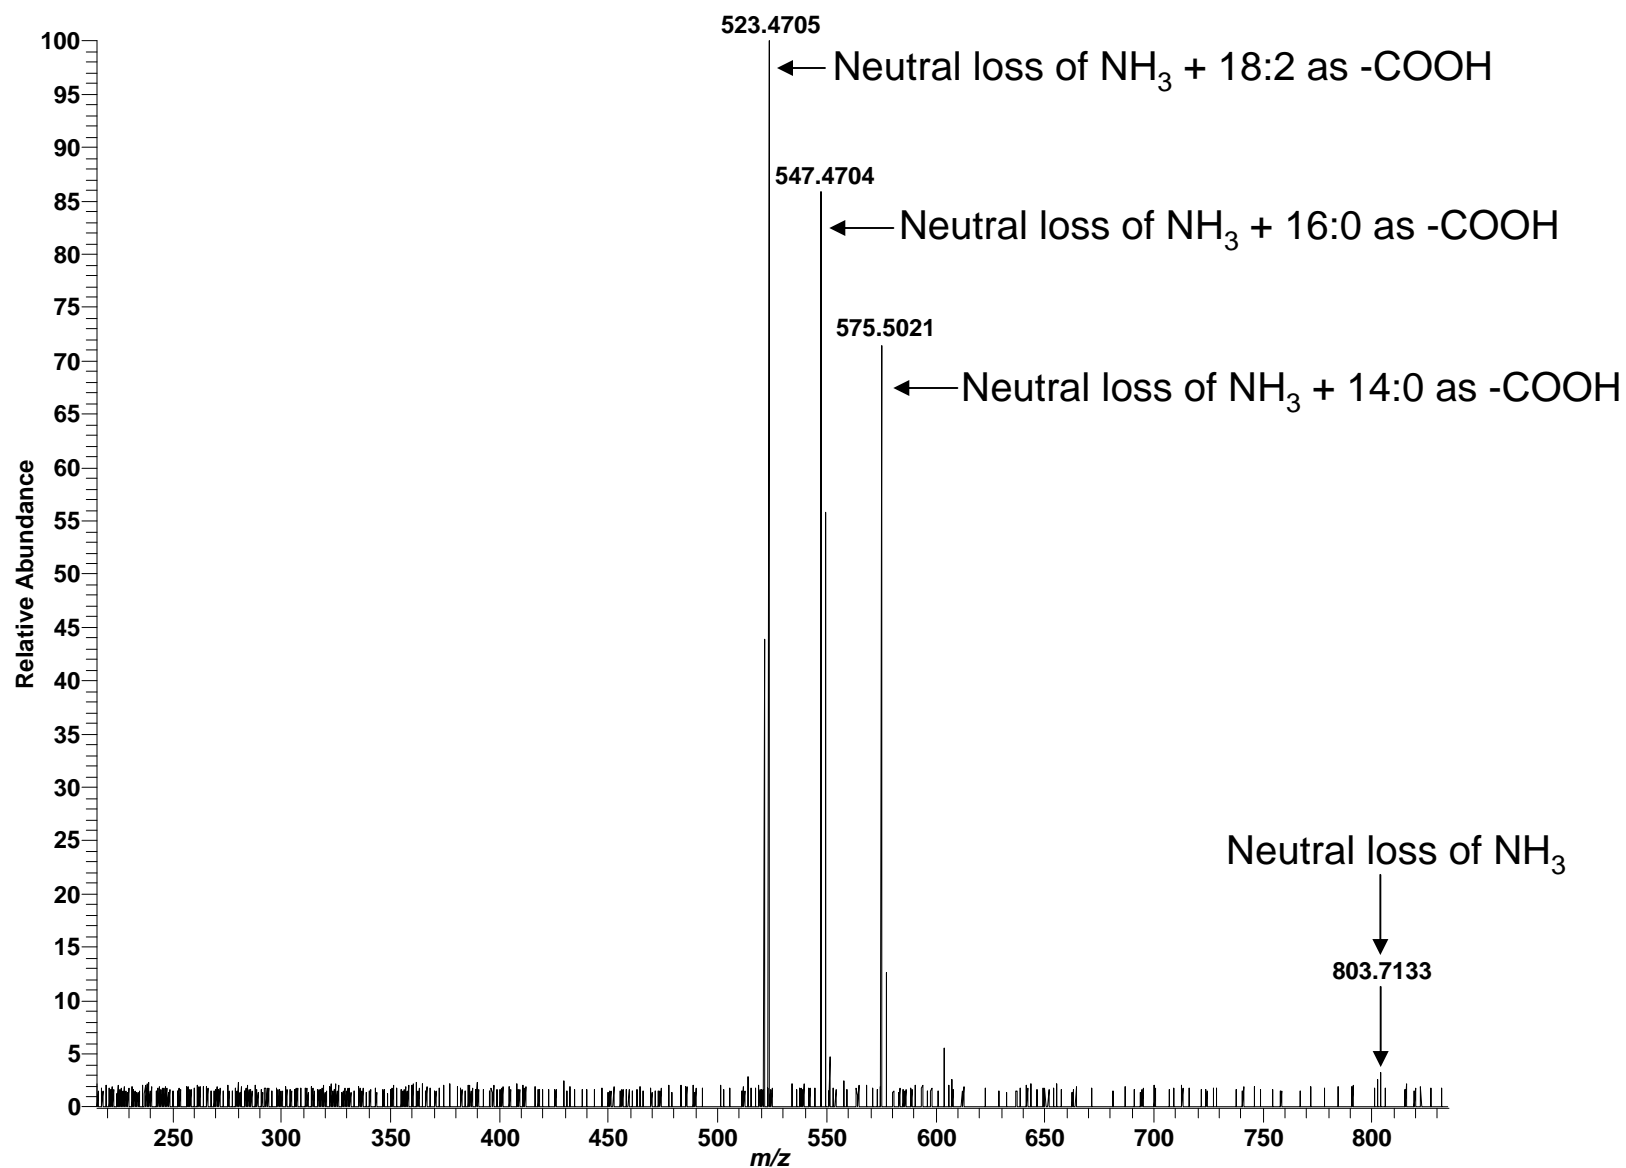

# High mass measurement accuracy MS/MS utilizing LTQ-FT

Positive ESI: TAG (14:0,16:1,18:1);  $C_{51}H_{94}O_6$ ; theoretical  $m/z$  820.7394,  $(M+NH_4)^+$

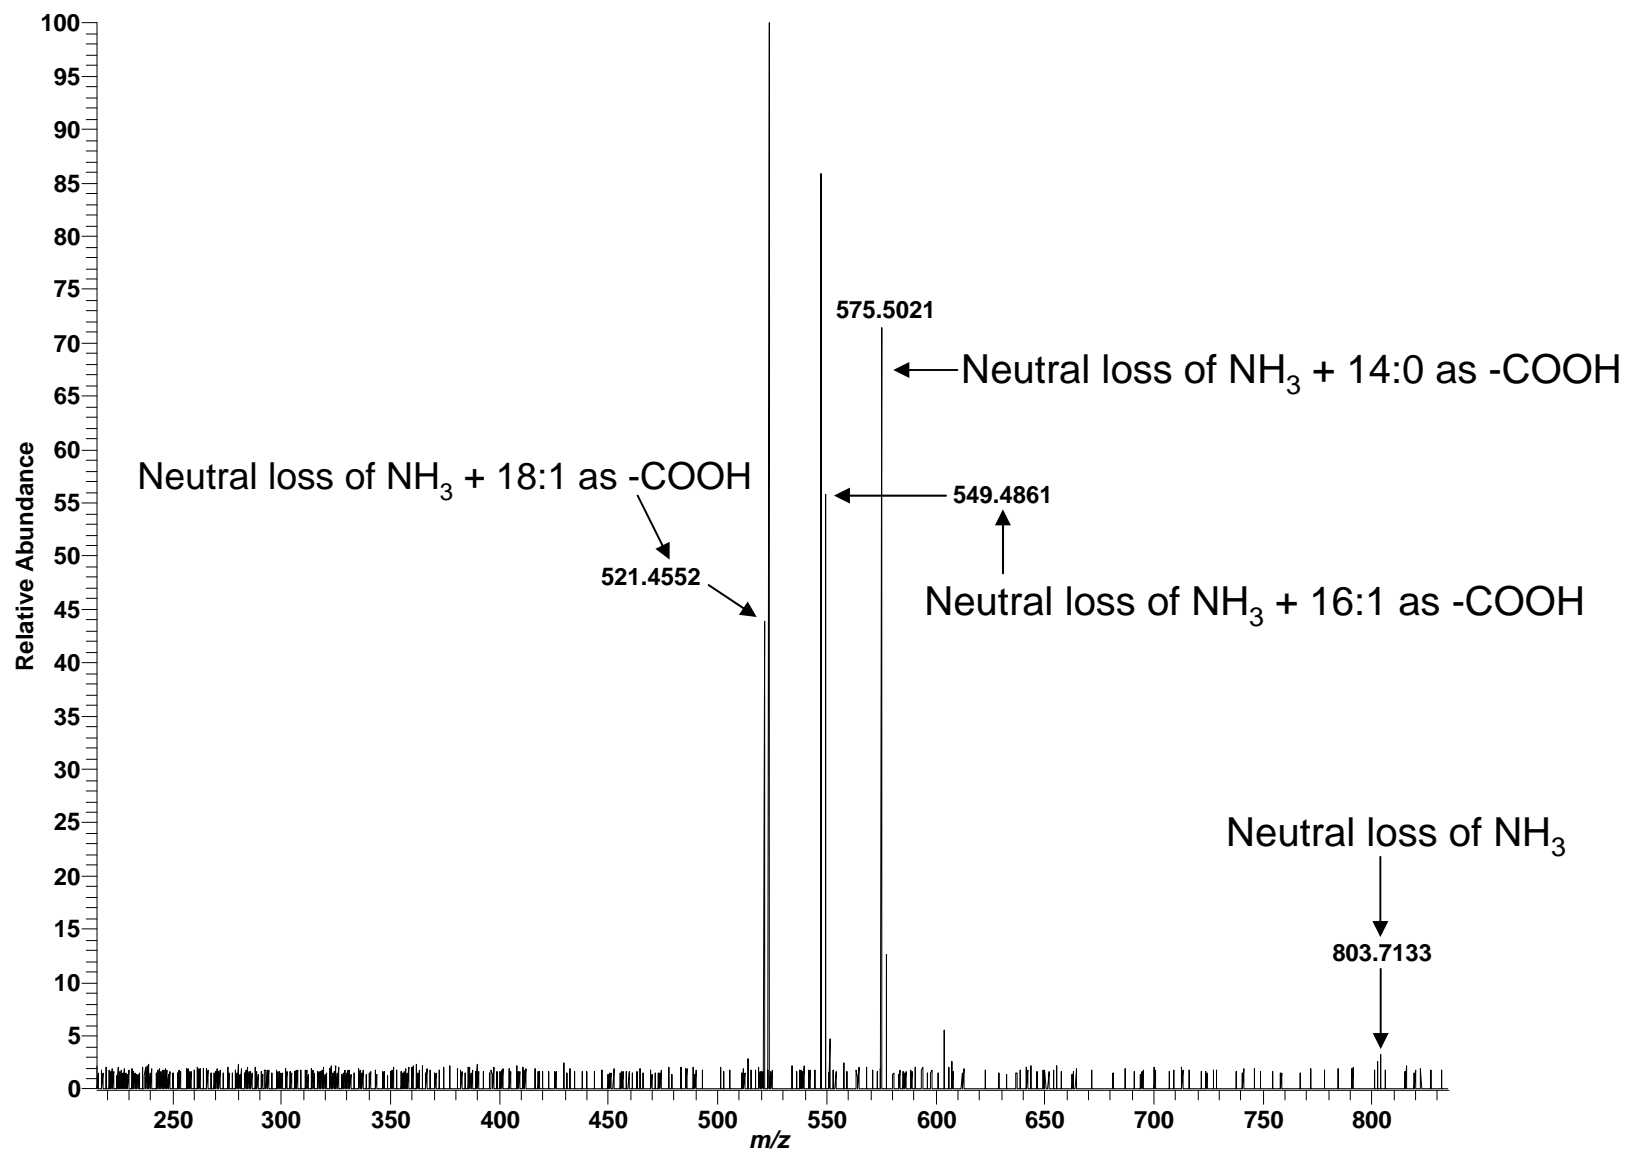

# High mass measurement accuracy MS/MS utilizing LTQ-FT

Positive ESI: TAG (16:0,18:1,18:2);  $C_{55}H_{100}O_6$ ; theoretical  $m/z$  874.7864,  $(M+NH_4)^+$

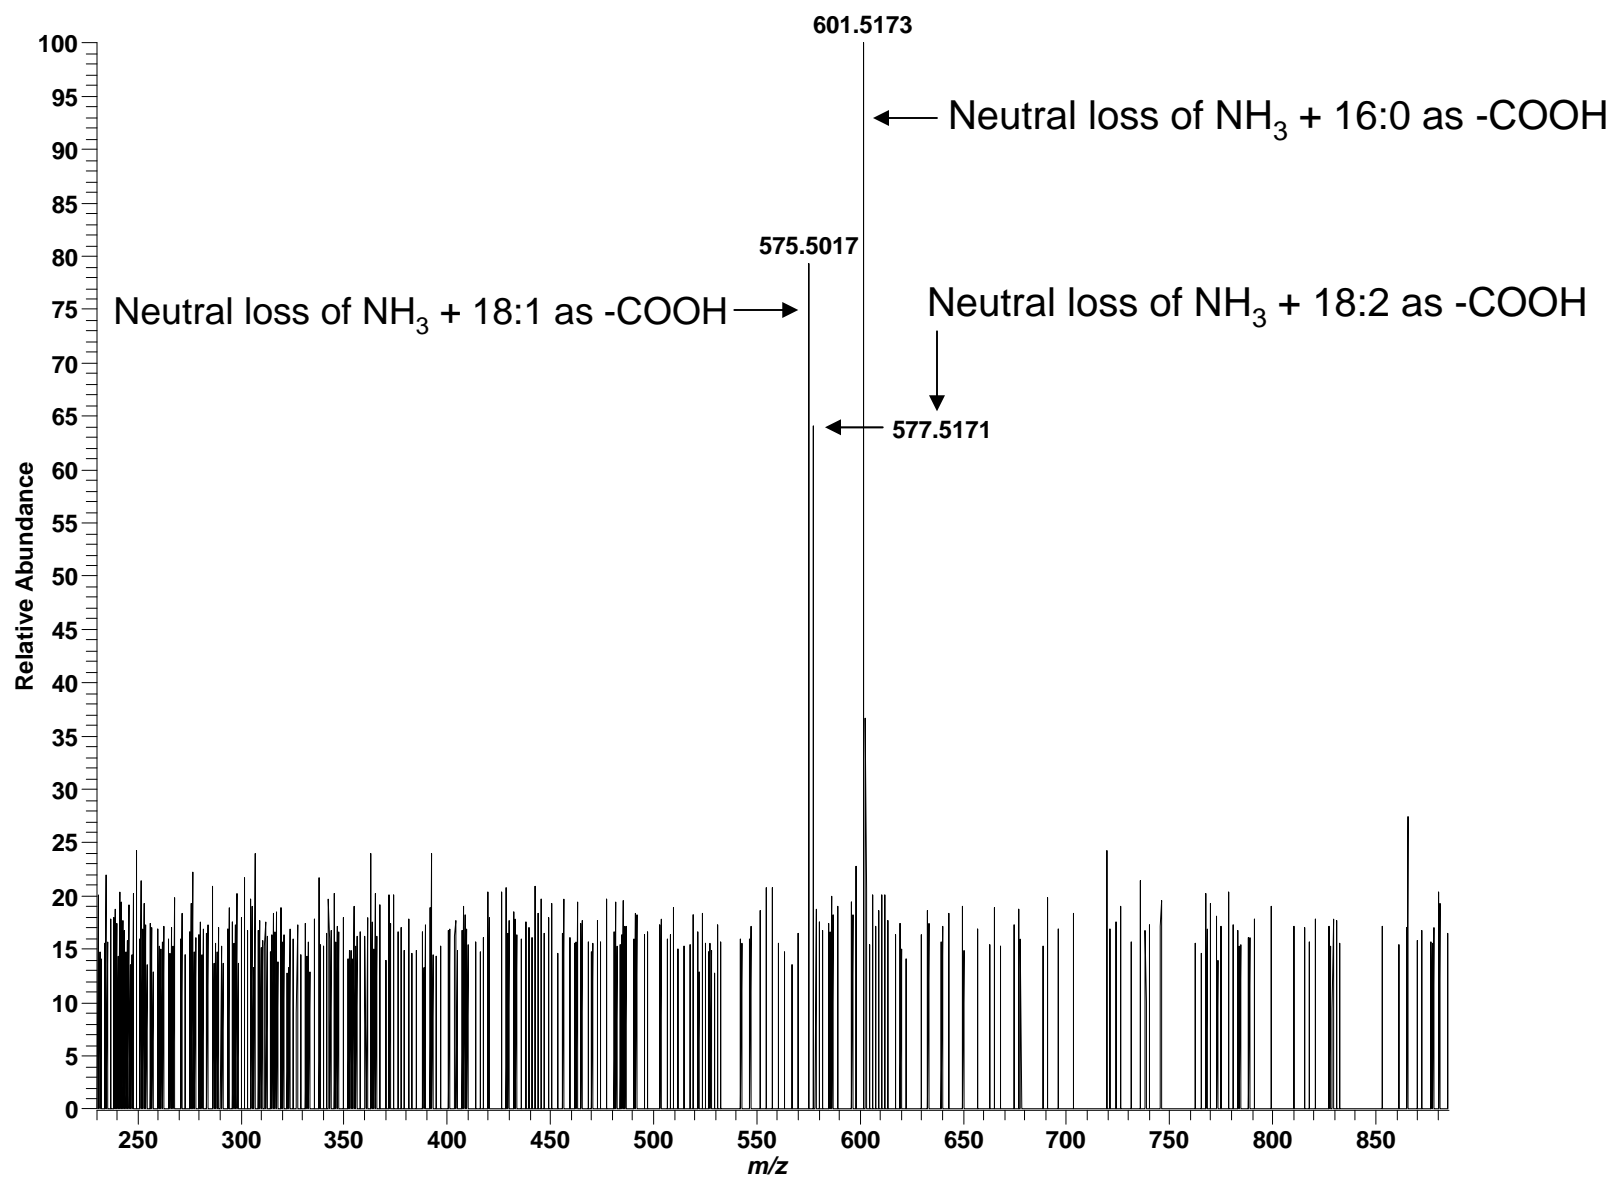

# High mass measurement accuracy MS/MS utilizing LTQ-FT

Positive ESI: TAG (16:0,16:1,18:1);  $C_{53}H_{98}O_6$ ; theoretical  $m/z$  848.7707,  $(M+NH_4)^+$

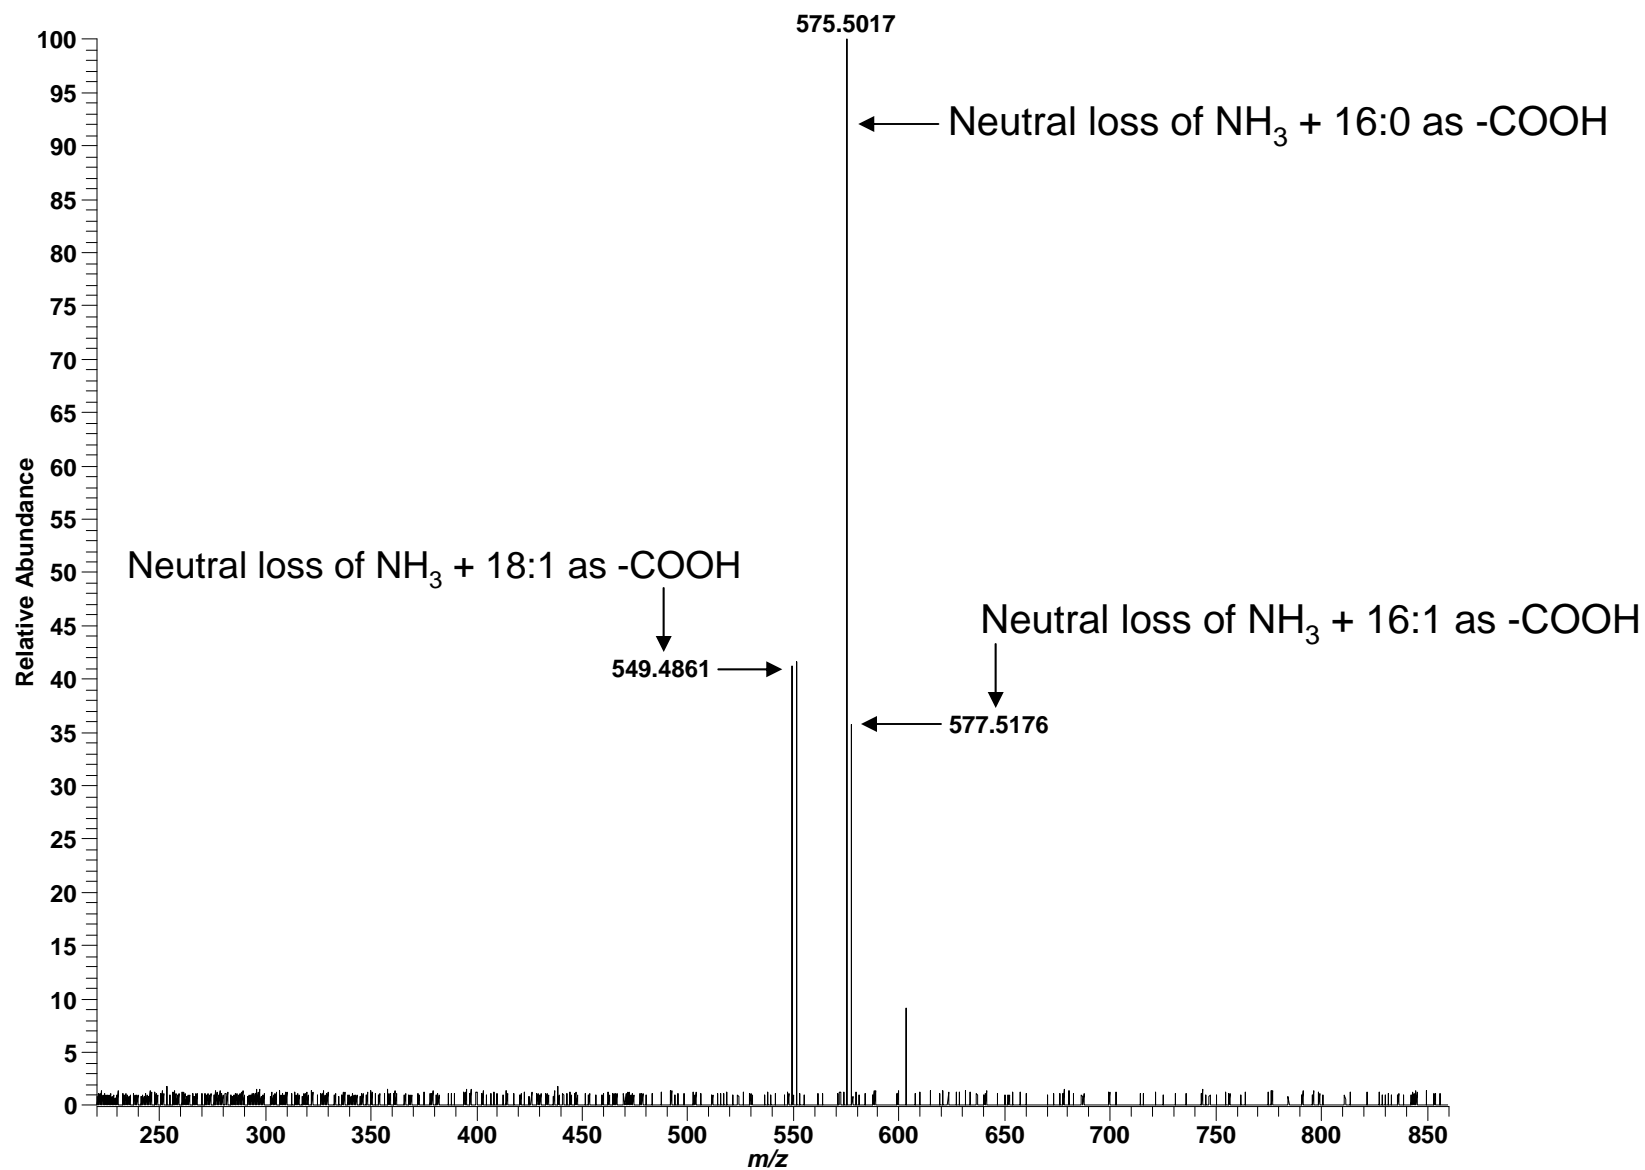

# High mass measurement accuracy MS/MS utilizing LTQ-FT

Positive ESI: TAG (16:0,16:0,18:2);  $C_{57}H_{102}O_6$ ; theoretical  $m/z$  848.7707,  $(M+NH_4)^+$

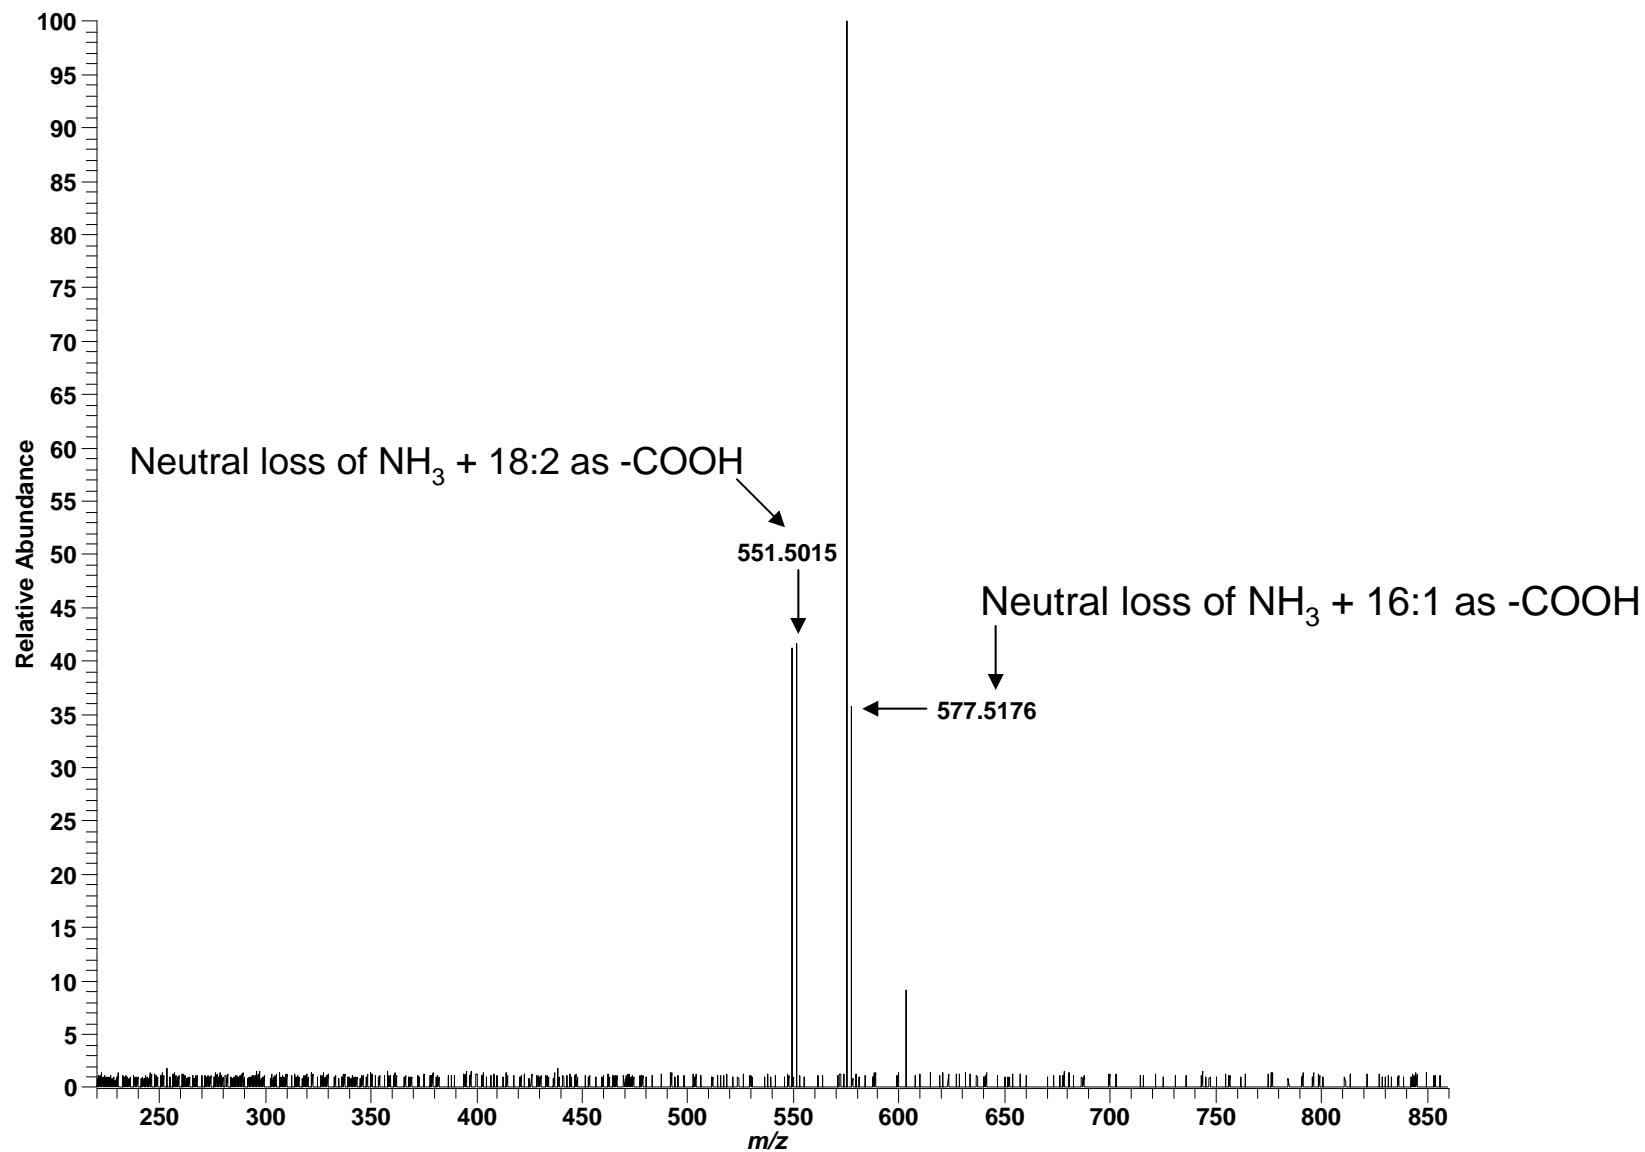



# High mass measurement accuracy MS/MS utilizing LTQ-FT

Positive ESI: TAG (18:1,18:1,18:2);  $C_{57}H_{102}O_6$ ; theoretical  $m/z$  900.8020,  $(M+NH_4)^+$

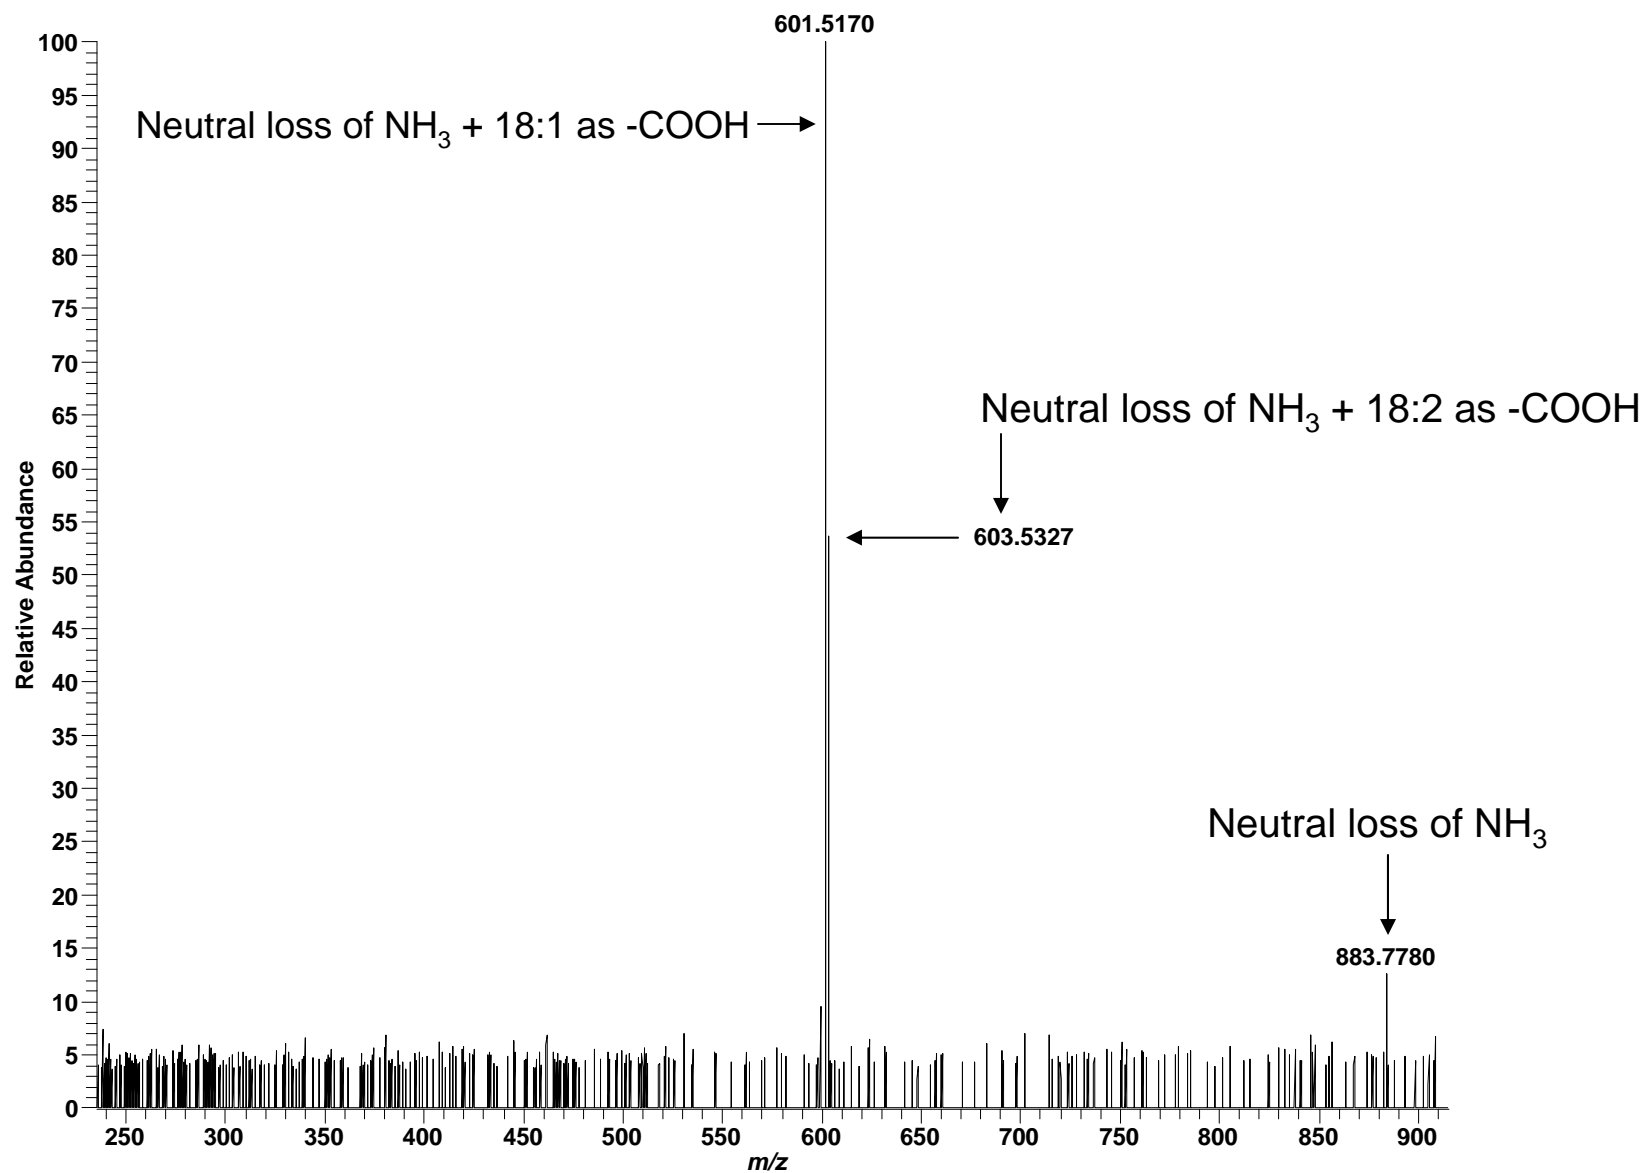

# High mass measurement accuracy MS/MS utilizing LTQ-FT

Positive ESI: TAG (16:0,18:1,18:1);  $C_{55}H_{102}O_6$ ; theoretical  $m/z$  876.8020,  $(M+NH_4)^+$

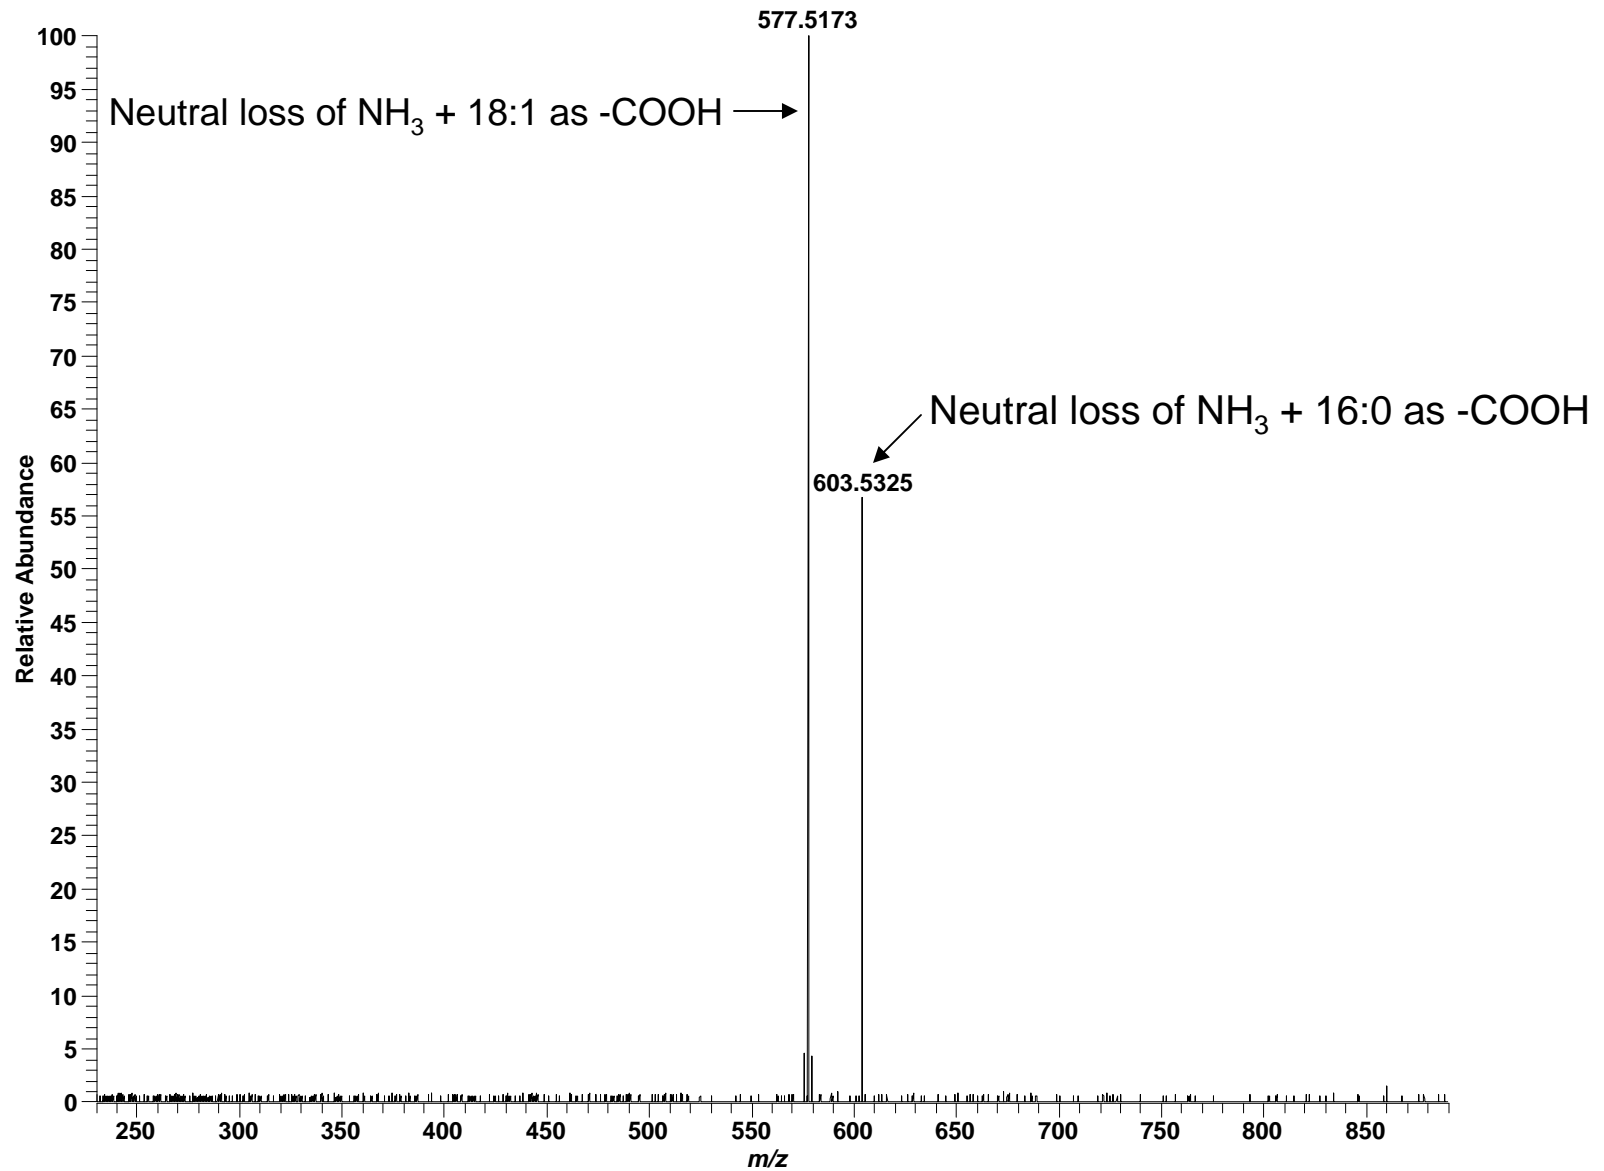

# High mass measurement accuracy MS/MS utilizing LTQ-FT

Positive ESI: TAG (18:1,18:1,20:4);  $C_{59}H_{102}O_6$ ; theoretical  $m/z$  924.8020,  $(M+NH_4)^+$

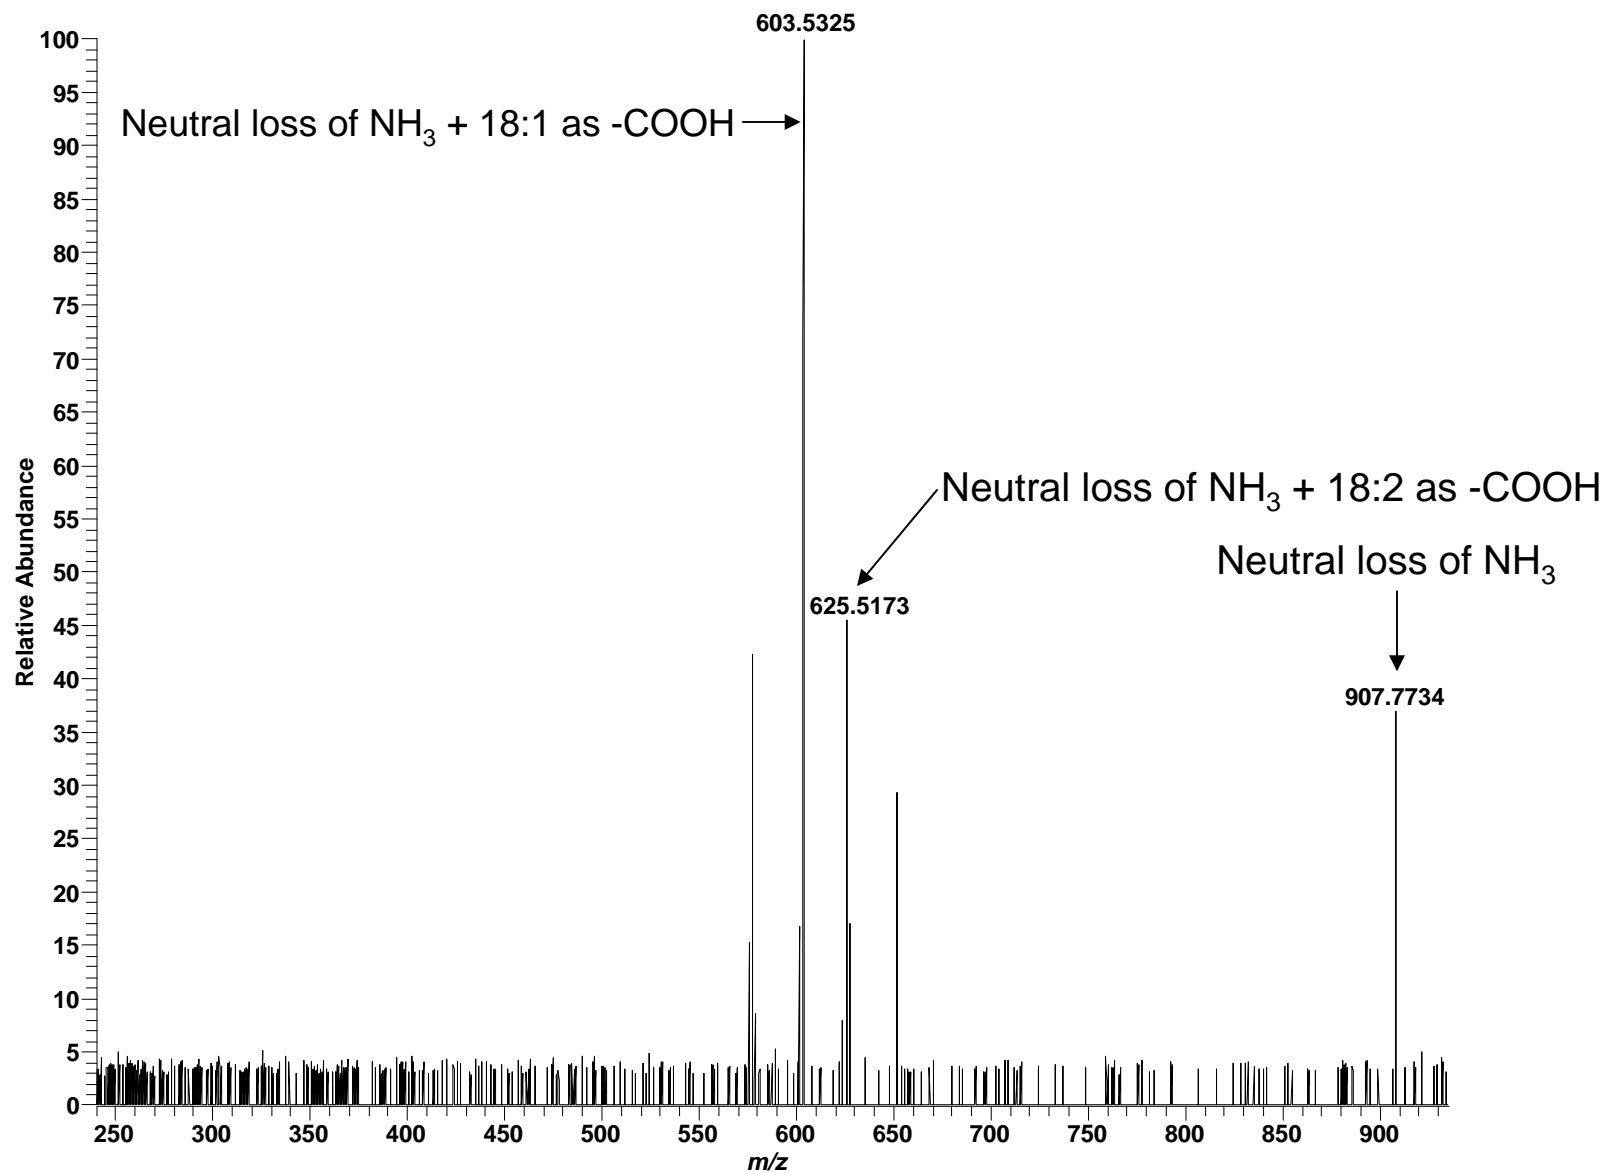

# High mass measurement accuracy MS/MS utilizing LTQ-FT

Positive ESI: TAG (16:0,20:3,20:3);  $C_{59}H_{102}O_6$ ; theoretical  $m/z$  924.8020,  $(M+NH_4)^+$

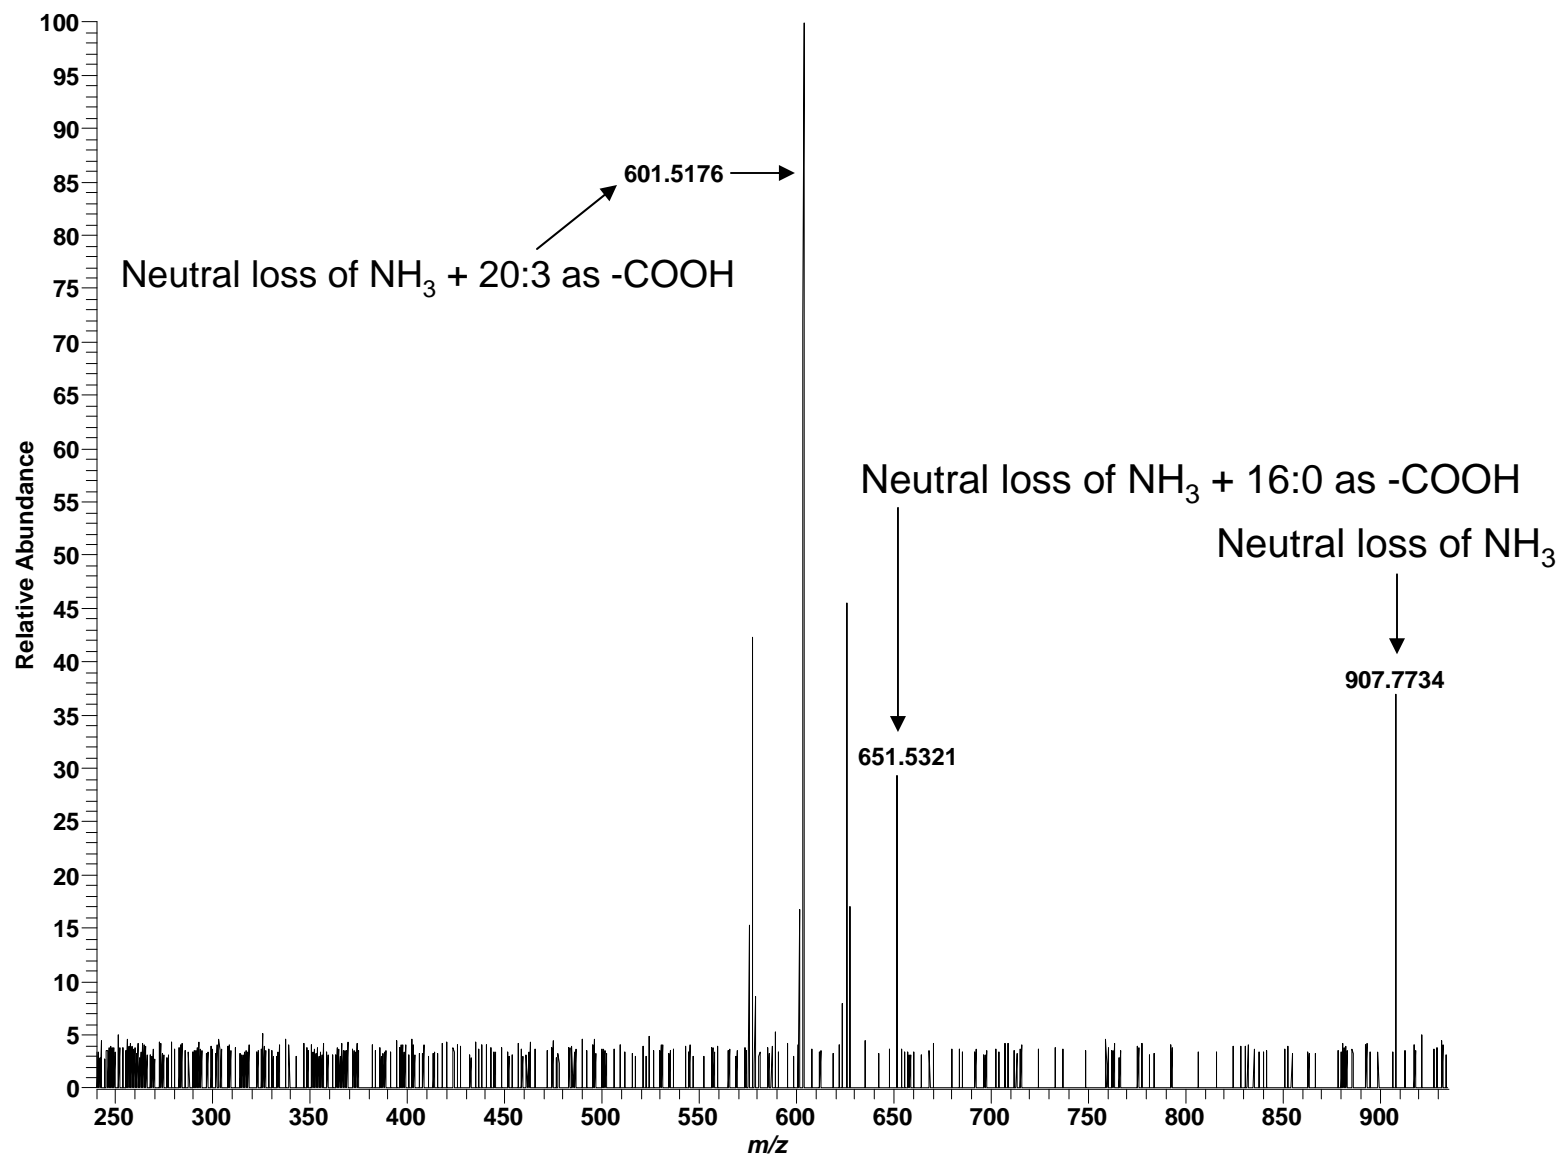

# High mass measurement accuracy MS/MS utilizing LTQ-FT

Positive ESI: TAG (16:0,18:2,22:4);  $C_{59}H_{102}O_6$ ; theoretical  $m/z$  924.8020,  $(M+NH_4)^+$

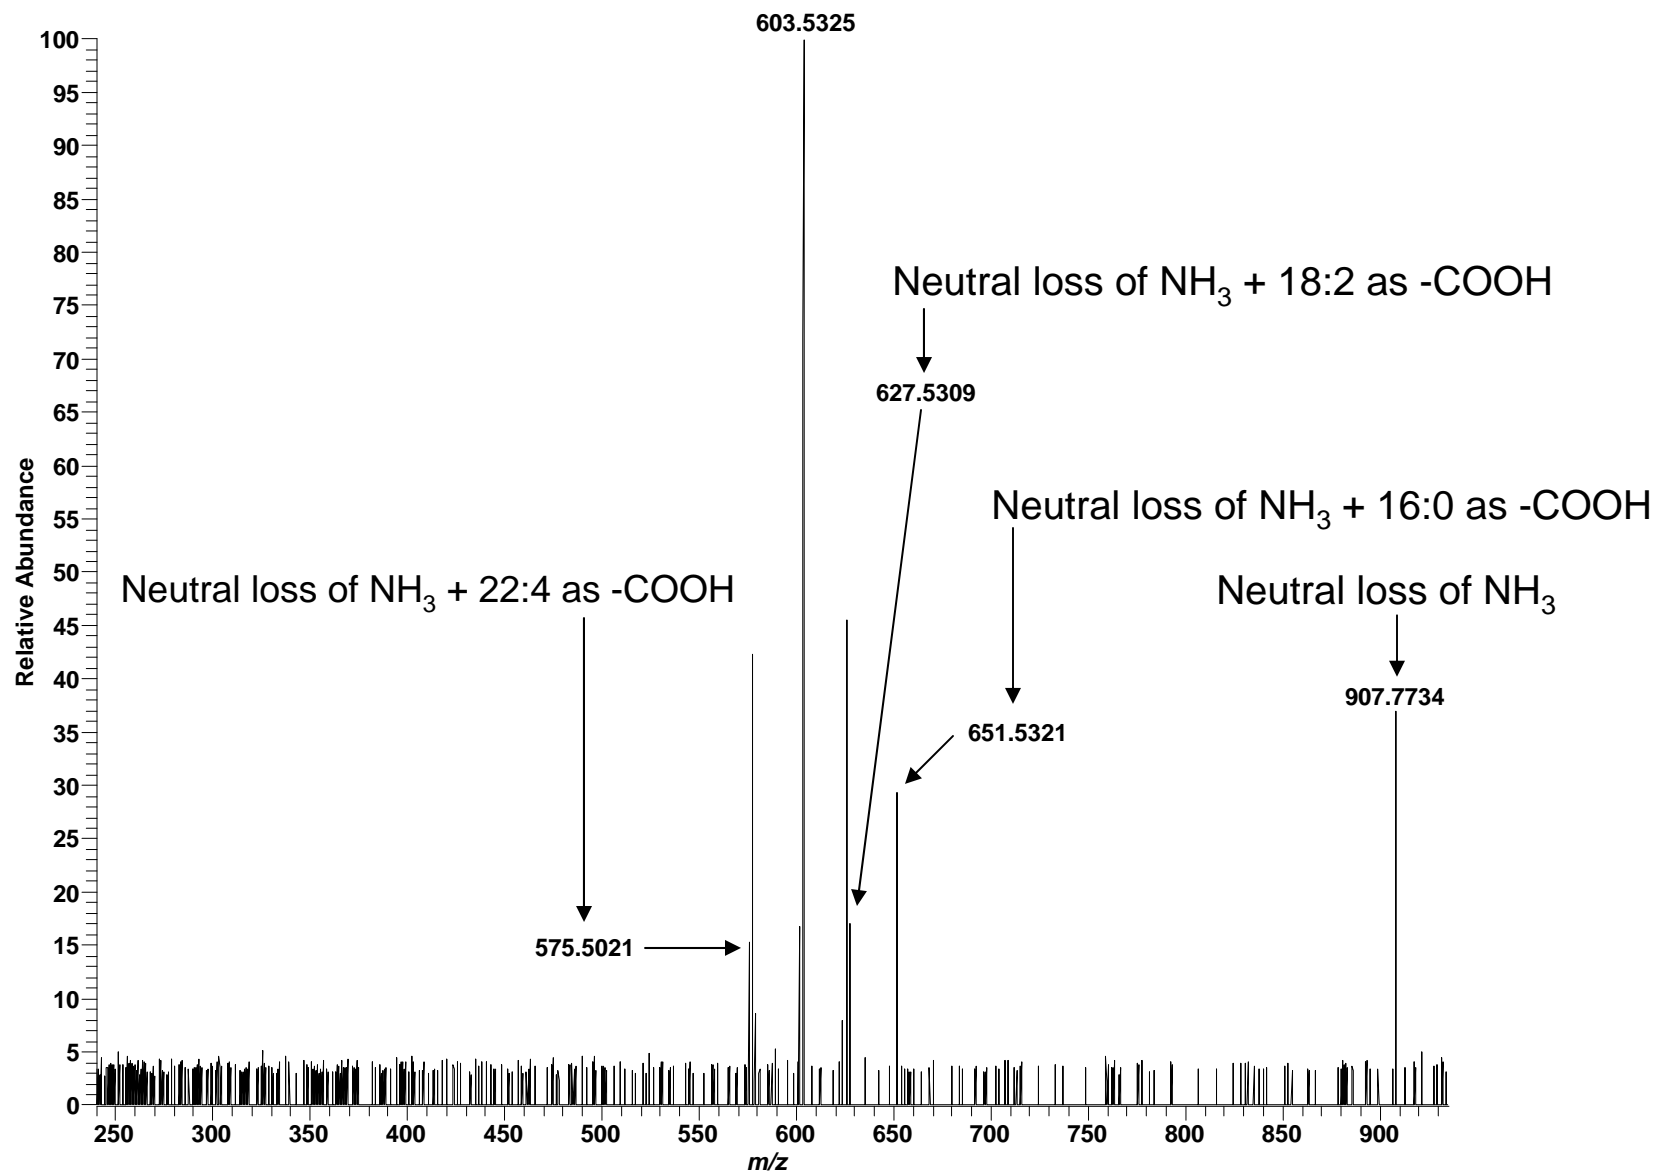

# High mass measurement accuracy MS/MS utilizing LTQ-FT

Positive ESI: TAG (14:0,16:0,18:1);  $C_{51}H_{96}O_6$ ; theoretical  $m/z$  822.7550,  $(M+NH_4)^+$

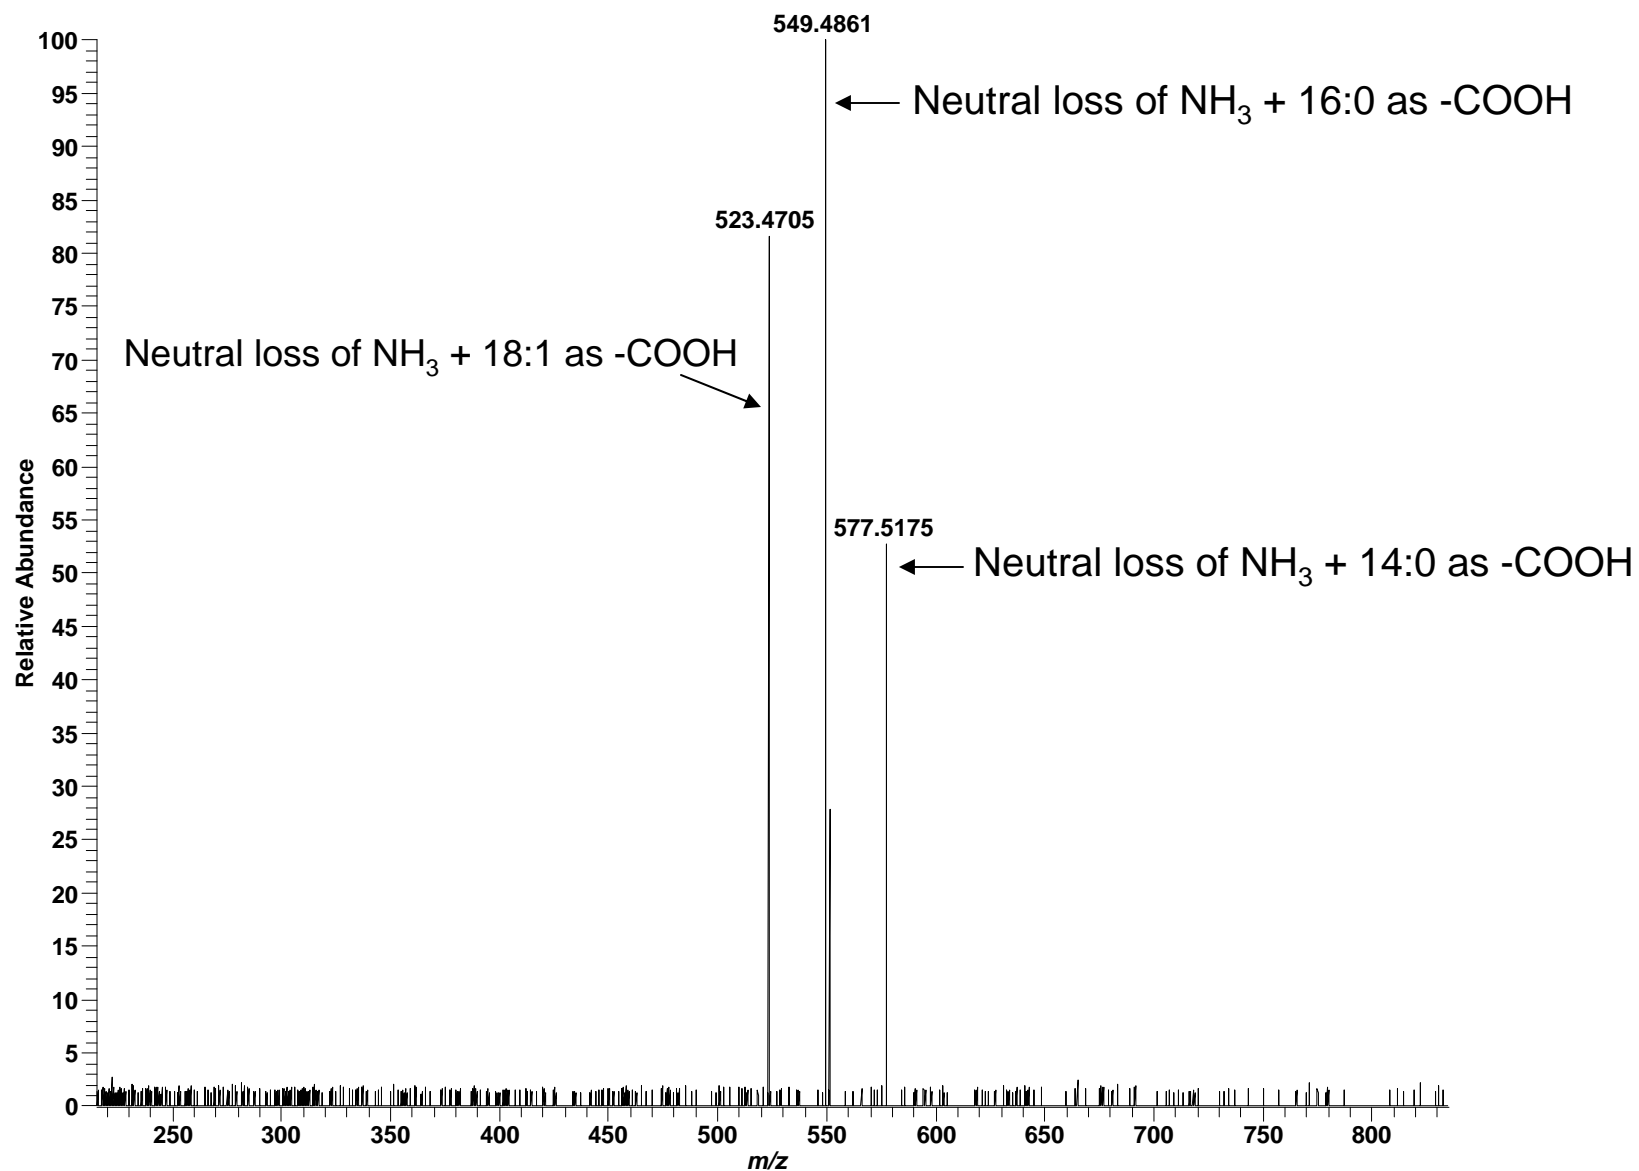

# High mass measurement accuracy MS/MS utilizing LTQ-FT

Positive ESI: TAG (16:0,16:0,16:1);  $C_{51}H_{96}O_6$ ; theoretical  $m/z$  822.7550,  $(M+NH_4)^+$

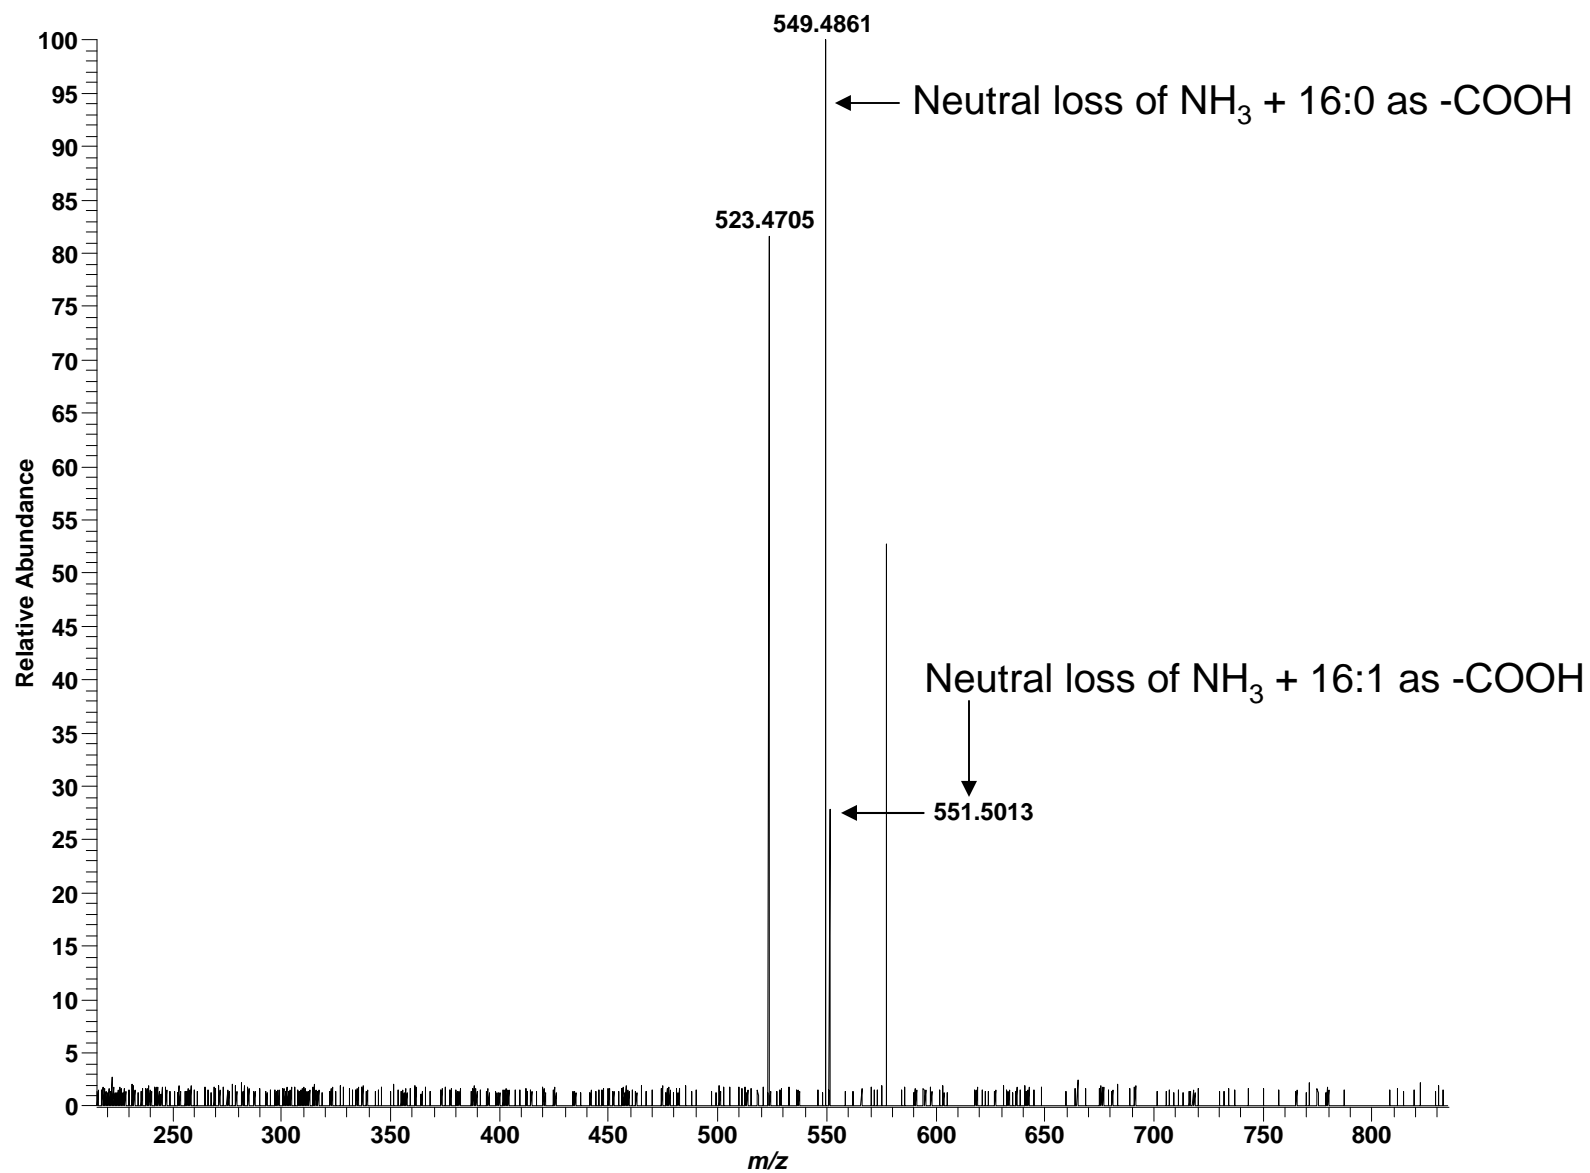

# High mass measurement accuracy MS/MS utilizing LTQ-FT

Positive ESI: TAG (18:0,18:1,18:2);  $C_{57}H_{104}O_6$ ; theoretical  $m/z$  902.8177,  $(M+NH_4)^+$

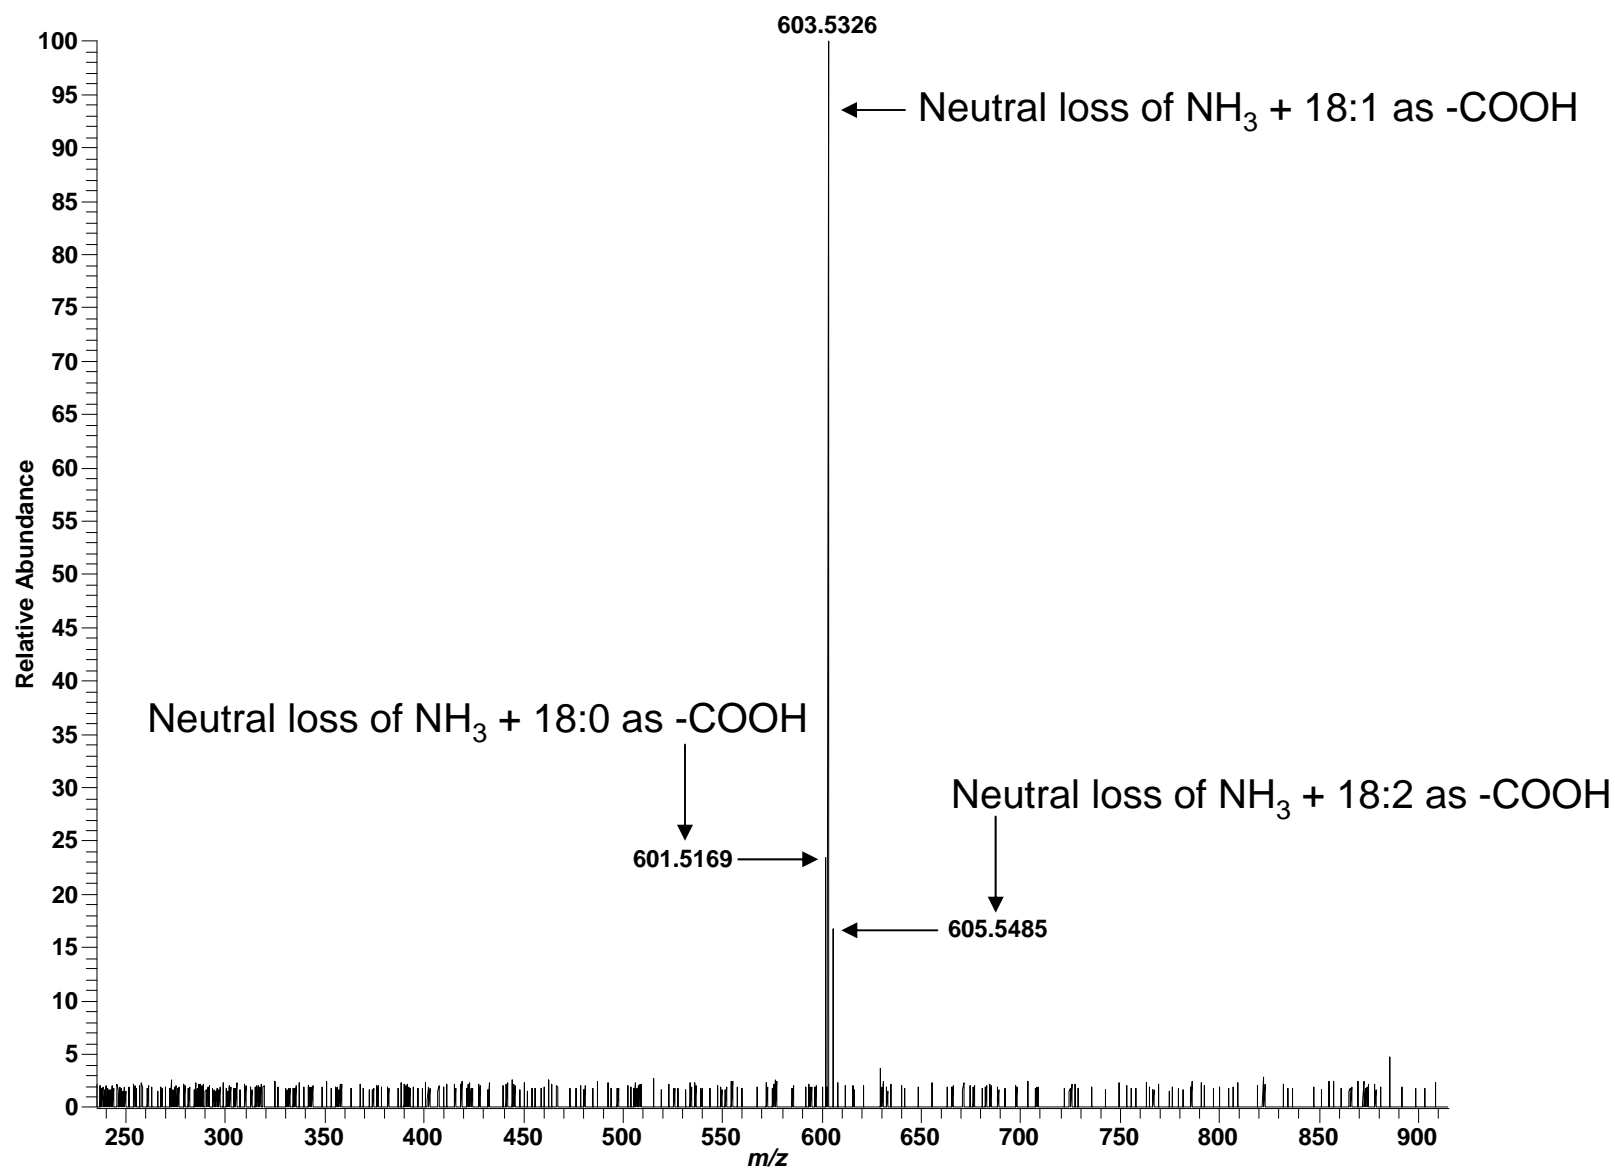



# High mass measurement accuracy MS/MS utilizing LTQ-FT

Positive ESI: TAG (16:0,16:0,18:1);  $C_{53}H_{100}O_6$ ; theoretical  $m/z$  850.7864,  $(M+NH_4)^+$

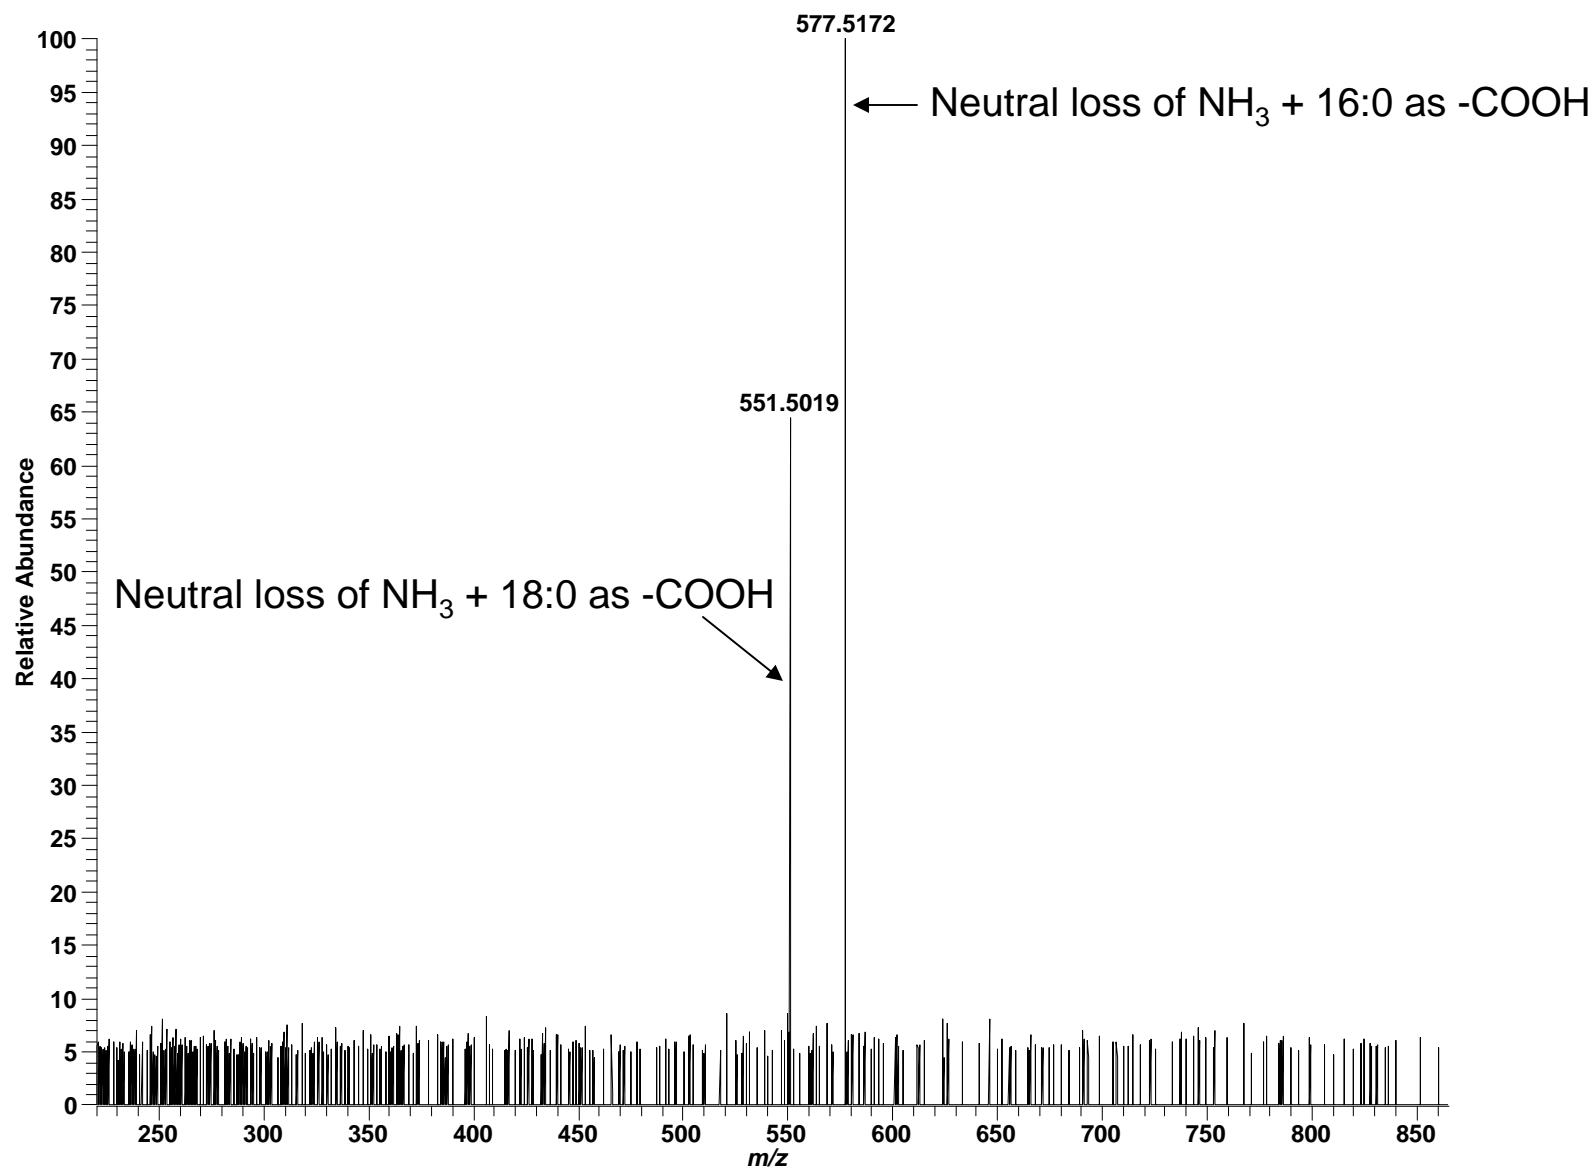

Supplement: NIHMS66614-supplement-02.pdf [file NIHMS66614-supplement-02.pdf]
